# Supplementary material for: Comparative efficacy and acceptability of 21 antidepressant drugs for the acute treatment of adults with major depressive disorder: a systematic review and network meta-analysis
Source: PubMed Central journal article supplement (PMC5889788; doi:10.1016/s0140-6736(17)32802-7), 2018-04-07
Supplement: mmc1.pdf [file mmc1.pdf]

# THE LANCET

## Supplementary appendix

This appendix formed part of the original submission and has been peer reviewed.  
We post it as supplied by the authors.

Supplement to: Cipriani A, Furukawa TA, Salanti G, et al. Comparative efficacy and acceptability of 21 antidepressant drugs for the acute treatment of adults with major depressive disorder: a systematic review and network meta-analysis. *Lancet* 2018; published online Feb 21. [http://dx.doi.org/10.1016/S0140-6736\(17\)32802-7](http://dx.doi.org/10.1016/S0140-6736(17)32802-7).

**COMPARATIVE EFFICACY AND ACCEPTABILITY OF FIRST- AND  
SECOND- GENERATION ANTIDEPRESSANTS IN THE ACUTE  
TREATMENT OF MAJOR DEPRESSIVE DISORDER: A NETWORK  
META-ANALYSIS**

Andrea Cipriani, Toshi A Furukawa, Georgia Salanti, Anna Chaimani, Lauren Z Atkinson, Yusuke Ogawa, Stefan Leucht, Henricus G Ruhe, Erick H Turner, Julian PT Higgins, Matthias Egger, Nozomi Takeshima, Yu Hayasaka, Hissei Imai, Kiyomi Shinohara, Aran Tajika, John PA Ioannidis, John R Geddes

## Supplementary Appendix

## Contents

|                                                                                        |            |
|----------------------------------------------------------------------------------------|------------|
| <b>Supplementary Appendix .....</b>                                                    | <b>1</b>   |
| <b>Contents.....</b>                                                                   | <b>2</b>   |
| <b>1 Reference list of included studies .....</b>                                      | <b>6</b>   |
| <b>2 Characteristics of included studies .....</b>                                     | <b>65</b>  |
| <b>3 Risk of bias table of included studies .....</b>                                  | <b>115</b> |
| <b>4 Definition of covariates .....</b>                                                | <b>133</b> |
| <b>4.1 Sponsorship.....</b>                                                            | <b>133</b> |
| <b>4.2 Baseline severity.....</b>                                                      | <b>133</b> |
| <b>4.3 Novelty of the agent .....</b>                                                  | <b>133</b> |
| <b>4.4 Licensed and accepted dose ranges.....</b>                                      | <b>133</b> |
| <b>4.5 Unpublished data.....</b>                                                       | <b>134</b> |
| <b>4.6 Risk of bias in the included studies .....</b>                                  | <b>136</b> |
| <b>5 Heterogeneity parameter standard deviations estimated in various models .....</b> | <b>137</b> |
| <b>5.1 Primary outcomes.....</b>                                                       | <b>137</b> |
| 5.1.1 Response.....                                                                    | 137        |
| 5.1.2 Dropouts for any reason .....                                                    | 137        |
| <b>5.2 Secondary outcomes .....</b>                                                    | <b>137</b> |
| 5.2.1 Efficacy continuous .....                                                        | 137        |
| 5.2.2 Remission .....                                                                  | 137        |
| 5.2.3 Dropouts due to adverse events .....                                             | 137        |
| <b>6 Estimation of inconsistency: summary of results .....</b>                         | <b>138</b> |
| <b>7 Analyses of the all trials network (including placebo arms).....</b>              | <b>139</b> |
| <b>7.1 Results from pairwise meta-analyses .....</b>                                   | <b>139</b> |
| 7.1.1 Response.....                                                                    | 140        |
| 7.1.2 Dropouts for any reason .....                                                    | 141        |
| 7.1.3 Efficacy continuous .....                                                        | 142        |
| 7.1.4 Remission .....                                                                  | 143        |
| 7.1.5 Dropouts due to adverse events .....                                             | 144        |
| <b>7.2 Results from network meta-analyses .....</b>                                    | <b>145</b> |
| 7.2.1 Response.....                                                                    | 145        |

|            |                                                                                    |            |
|------------|------------------------------------------------------------------------------------|------------|
| 7.2.2      | Dropouts for any reason .....                                                      | 148        |
| 7.2.3      | Efficacy continuous .....                                                          | 150        |
| 7.2.4      | Remission .....                                                                    | 152        |
| 7.2.5      | Dropouts due to adverse events .....                                               | 154        |
| <b>7.3</b> | <b>Assessment of transitivity .....</b>                                            | <b>156</b> |
| <b>7.4</b> | <b>Evaluation of inconsistency.....</b>                                            | <b>157</b> |
| 7.4.1      | Response .....                                                                     | 157        |
| 7.4.2      | Dropouts for any reason.....                                                       | 161        |
| 7.4.3      | Efficacy continuous .....                                                          | 166        |
| 7.4.4      | Remission.....                                                                     | 170        |
| 7.4.5      | Dropouts due to adverse events.....                                                | 174        |
| <b>7.5</b> | <b>Comparison-adjusted funnel plots (all drugs vs placebo).....</b>                | <b>179</b> |
| 7.5.1      | Response .....                                                                     | 179        |
| 7.5.2      | Dropouts for any reason.....                                                       | 180        |
| 7.5.3      | Efficacy continuous .....                                                          | 180        |
| 7.5.4      | Remission.....                                                                     | 181        |
| 7.5.5      | Dropouts due to adverse events.....                                                | 181        |
| <b>7.6</b> | <b>Meta-regressions and sensitivity analyses .....</b>                             | <b>182</b> |
| 7.6.1      | Statistical details for network meta-analysis and meta-regression models.....      | 182        |
| 7.6.2      | Changes in heterogeneity after accounting for potential effect modifiers.....      | 183        |
| 7.6.3      | Sensitivity analyses .....                                                         | 184        |
| 7.6.4      | Summary of significance in the regression coefficients from meta-regressions ..... | 187        |
| 7.6.5      | Odds-ratios for response and dropout for any reason adjusted for covariates. ....  | 188        |
| 7.6.6      | Summary of the findings from meta-regressions and subgroup analyses .....          | 195        |
| <b>8</b>   | <b>Analyses of the head-to-head trials network.....</b>                            | <b>197</b> |
| <b>8.1</b> | <b>Results from network meta-analyses .....</b>                                    | <b>197</b> |
| 8.1.1      | Response.....                                                                      | 197        |
| 8.1.2      | Dropouts for any reason .....                                                      | 199        |
| 8.1.3      | Efficacy continuous .....                                                          | 202        |
| 8.1.4      | Remission .....                                                                    | 204        |
| 8.1.5      | Dropouts due to adverse events.....                                                | 206        |
| <b>8.2</b> | <b>Assessment of transitivity .....</b>                                            | <b>208</b> |
| <b>8.3</b> | <b>Inconsistency .....</b>                                                         | <b>209</b> |
| 8.3.1      | Response .....                                                                     | 209        |
| 8.3.2      | Dropouts for any reason.....                                                       | 212        |
| 8.3.3      | Efficacy continuous .....                                                          | 215        |

|             |                                                                                                        |            |
|-------------|--------------------------------------------------------------------------------------------------------|------------|
| 8.3.4       | <b>Remission</b> .....                                                                                 | 218        |
| 8.3.5       | <b>Dropouts due to adverse events</b> .....                                                            | 221        |
| <b>8.4</b>  | <b>Comparison-adjusted funnel plots (active vs fluoxetine)</b> .....                                   | <b>225</b> |
| 8.4.1       | <b>Response</b> .....                                                                                  | 225        |
| 8.4.2       | <b>Dropouts for any reason</b> .....                                                                   | 226        |
| 8.4.3       | <b>Efficacy continuous</b> .....                                                                       | 226        |
| 8.4.4       | <b>Remission</b> .....                                                                                 | 227        |
| 8.4.5       | <b>Dropouts due to adverse events</b> .....                                                            | 227        |
| <b>8.5</b>  | <b>Meta-regressions and sensitivity analyses</b> .....                                                 | <b>228</b> |
| 8.5.1       | Changes in heterogeneity after accounting for potential effect modifiers.....                          | 228        |
| 8.5.2       | Odds-ratios for response and dropout for any reason adjusted for covariates.....                       | 228        |
| <b>9</b>    | <b>GRADE for the primary outcomes</b> .....                                                            | <b>231</b> |
| <b>9.1</b>  | <b>Response</b> .....                                                                                  | <b>231</b> |
| 9.1.1       | Summary of study limitations of the included studies.....                                              | 231        |
| 9.1.2       | Contribution of low or moderate RoB comparisons to each network estimate.....                          | 231        |
| 9.1.3       | Table of reasons for downgrading.....                                                                  | 237        |
| <b>9.2</b>  | <b>Dropouts for any reason</b> .....                                                                   | <b>250</b> |
| 9.2.1       | Summary of study limitations of the included studies.....                                              | 250        |
| 9.2.2       | Contribution of low or moderate RoB comparisons to each network estimate.....                          | 250        |
| 9.2.3       | Table of reasons for downgrading.....                                                                  | 255        |
| <b>10</b>   | <b>SUCRA and cumulative probability plots</b> .....                                                    | <b>266</b> |
| <b>10.1</b> | <b>All trials</b> .....                                                                                | <b>266</b> |
| 10.1.1      | Response.....                                                                                          | 266        |
| 10.1.2      | Dropouts for any reason.....                                                                           | 268        |
| 10.1.3      | Efficacy as continuous outcome.....                                                                    | 270        |
| 10.1.4      | Remission.....                                                                                         | 272        |
| 10.1.5      | Dropouts due to adverse events.....                                                                    | 274        |
| <b>10.2</b> | <b>Head-to-head trials</b> .....                                                                       | <b>276</b> |
| 10.2.1      | Response.....                                                                                          | 276        |
| 10.2.2      | Dropouts for any reason.....                                                                           | 278        |
| 10.2.3      | Efficacy as continuous outcome.....                                                                    | 280        |
| 10.2.4      | Remission.....                                                                                         | 282        |
| 10.2.5      | Dropouts due to adverse eventss.....                                                                   | 284        |
| <b>11</b>   | <b>Post hoc sensitivity analyses and meta-regression analyses (as requested by peer reviewers)</b> ... | <b>286</b> |
| <b>11.1</b> | <b>Meta-regression using the mean age of participants as covariate</b> .....                           | <b>286</b> |

|      |                                                                                               |     |
|------|-----------------------------------------------------------------------------------------------|-----|
| 11.2 | Meta-regression using the sex distribution (percentage of females in each study) as covariate | 286 |
| 11.3 | Sensitivity analysis excluding studies including bipolar patients.....                        | 287 |
| 11.4 | Sensitivity analysis for study duration (8 weeks or less versus more than 8 weeks) .....      | 288 |
| 11.5 | Sensitivity analysis for country (North America only vs other) .....                          | 288 |
| 12   | Changes to the protocol.....                                                                  | 289 |

## ***1 Reference list of included studies***

### **1. Aberg-Wistedt 2000**

- Aberg-Wistedt A, Agren H, Ekselius L, Bengtsson F, Akerblad AC. Sertraline versus paroxetine in major depression: clinical outcome after six months of continuous therapy. *J Clin Psychopharmacol.* 2000;20(6):645-52.

### **2. Aguglia 1993**

- Aguglia E, Casacchia M, Cassano GB, Faravelli C, Ferrari G, Giordano P, Pancheri P, Ravizza L, Trabucchi M, Bolino F, Scarpato A, Berardi D, Provenzano G, Brugnoli R, Rozzini R. Double-blind study of the efficacy and safety of sertraline versus fluoxetine in major depression. *Int Clin Psychopharmacol.* 1993;8(3):197-202.

### **3. AK1102365**

- <https://www.gsk-clinicalstudyregister.com/study/AK1102365#ps>

### **4. Alexopoulos 2004 (poster SCT-MD-27)**

- [www.ncbi.nlm.nih.gov/pubmedhealth/PMH0016624/bin/app17c\\_et6.pdf](http://www.ncbi.nlm.nih.gov/pubmedhealth/PMH0016624/bin/app17c_et6.pdf)

### **5. Allard 2004**

- Allard P, Gram L, Timdahl K, Behnke K, Hanson M, Sogaard J. Efficacy and tolerability of venlafaxine in geriatric outpatients with major depression: a double-blind, randomised 6-month comparative trial with citalopram. *Int J Geriatr Psychiatry.* 2004;19(12):1123-30.

### **6. Altamura 1989b**

- Altamura AC, Mauri MC, Rudas N, Carpiniello B, Montanini R, Perini M, Scapicchio PL, Hadjichristos C, Carucci G, Minervini M, D'Aloise A, Malinconico A, Aguglia E, De Vanna R, D'Aronco R. Clinical activity and tolerability of trazodone, mianserin, and amitriptyline in elderly subjects with major depression: a controlled multicenter trial. *Clin Neuropharmacol.* 1989;12 Suppl 1:S25-33; S34-7.

### **7. Alvarez 2012 (11492A, NCT00839423)**

- Alvarez E, Perez V, Dragheim M, Loft H, Artigas F. A double-blind, randomized, placebo-controlled, active reference study of Lu AA21004 in patients with major depressive disorder. *Int J Neuropsychopharmacol.* 2012;15(5):589-600.
- <https://clinicaltrials.gov/ct2/show/NCT00839423>

### **8. Alves 1999**

- Alves C, Cachola I, Brandao J. Efficacy and tolerability of venlafaxine and fluoxetine in outpatients with major depression. *Primary Care Psychiatry.* 1999;5, 57-63.

#### **9. Amin 1984**

- Amin MM, Ananth JV, Coleman BS, Darcourt G, Farkas T, Goldstein B, Lapierre YD, Paykel E, Wakelin JS. Fluvoxamine: antidepressant effects confirmed in a placebo-controlled international study. *Clinical Neuropharmacology* 1984;7(suppl 1):580-581.

#### **10. Amini 2005**

- Amini H, Aghayan S, Jalili SA, Akhondzadeh S, Yahyazadeh O, Pakravan-Nejad M. Comparison of mirtazapine and fluoxetine in the treatment of major depressive disorder: a double-blind, randomized trial. *J Clin Pharmacy and Therapeutics*. 2005;30(2):133-138.

#### **11. Amsterdam 1986**

- Amsterdam JD, Case WG, Csanalosi E, Singer M, Rickels K. A double-blind comparative trial of zimelidine, amitriptyline, and placebo in patients with mixed anxiety and depression. *Pharmacopsychiatry*. 1986 May;19(3):115-9.

#### **12. Andersen 1986**

- Danish University Antidepressant Group. Citalopram: clinical effect profile in comparison with clomipramine. A controlled multicenter study. *Psychopharmacology*. 1986;90(1): 131-138.

#### **13. Ansseau 1989a**

- Ansseau M, von Frenckell R, Mertens C, de Wilde J, Botte L, Devoitille JM, Evrard JL, De Nayer A, Darimont P, Dejaiffe G, Mirel J, Meurice E, Parent M, Couzinier JP, Demarez JP, Serre C. Controlled comparison of two doses of milnacipran (F 2207) and amitriptyline in major depressive inpatients. *Psychopharmacology*. 1989;98(2):163-8.

#### **14. Ansseau 1989b**

- Ansseau M, von Frenckell R, Papart P, Mertens C, de Wilde J, Botte L, Devoitille JM, Evrard JL, De Nayer, Couzinier JP, Demarez JP, Serre C. A Controlled comparison of milnacipran (F2207) 200 mg and amitriptyline in endogenous depressive inpatients. *Human Psychopharmacology*. 1989;4(3);221-227.

#### **15. Ansseau 1991**

- Ansseau M, von Frenckell R, Gérard MA, Mertens C, De Wilde J, Botte L, Devoitille JM, Evrard JL, De Nayer A, Darimont P, Mirel J, Troisfontaines B, Toussaint C, Couzinier JP, Demarez JP, Serre C. Interest of a loading dose of milnacipran in endogenous depressive inpatients. Comparison with the standard regimen and with fluvoxamine. *Eur Neuropsychopharmacol*. 1991;1(2):113-21.

#### **16. Ansseau 1994a (MY-1005/BRL-029060/1/CPMS-112)**

- Ansseau M, Gabriëls A, Loyens J, Bartholomé F, Evrard JL, De Nayer A, Linhart R, Wirtz J, Bruynooghe F, Surinx K, Clarysse H, Marganne R, Papart P. Controlled comparison of paroxetine and fluvoxamine in major depression. *Human Psychopharmacology: Clinical and Experimental*. 1994;9(5):329-336.
- <https://www.gsk-clinicalstudyregister.com/study/29060/112?search=study&#rs>



#### **17. Ansseau 1994b**

- Anseau M, Papart P, Troisfontaines B, Bartholomé F, Bataille M, Charles G, Schittecatte M, Darimont P, Devoitille JM, De Wilde J, Dufrasne M, Gilson H, Evrard JL, De Nayer A, Krémer P, Mertens C, Serre C. Controlled comparison of milnacipran and fluoxetine in major depression. *Psychopharmacology*. 1994;114:131-7.

#### **18. Ansseau 1994c**

- Anseau M, Darimont P, Lecoq A, De Nayer A, Evrard JL, Krémer P, Devoitille JM, Dierick M, Mertens C, Mesotten F, Mirel J, Troisfontaines B, Van Moffaert M, Vanbrabant E. Controlled comparison of nefazodone and amitriptyline in major depressive inpatients. *Psychopharmacology*. 1994;115(1-2):254-60.

#### **19. Armitage 1997**

- Armitage R, Yonkers K, Cole DBA, Rush, JA. A Multicenter, Double-Blind Comparison of the Effects of Nefazodone and Fluoxetine on Sleep Architecture and Quality of Sleep in Depressed Outpatients. *J Clin Psychopharmacology*. 1997;17(3)161-168.

#### **20. Asnis 2013 (LVM-MD-01, NCT00969709)**

- Asnis GM, Bose A, Gommoll CP, Chen C, Greenberg WM. Efficacy and safety of levomilnacipran sustained release 40 mg, 80 mg, or 120 mg in major depressive disorder: a phase 3, randomized, double-blind, placebo-controlled study. *J Clin Psychiatry*. 2013 Mar;74(3):242-8.
- <https://clinicaltrials.gov/ct2/show/NCT00969709>

#### **21. Bakish 1992**

- Bakish D, Bradwejn J, Nair N, McClure J, Remick R, Bulger L. A comparison of moclobemide, amitriptyline and placebo in depression: a Canadian multicentre study. *Psychopharmacology (Berl)*. 1992;106 Suppl:S98-101.

#### **22. Bakish 1997**

- Bakish D, Cavazzonia P, Chudzika J, Ravindrana A, Hrdinaa PD. Effects of selective serotonin reuptake inhibitors on platelet serotonin parameters in major depressive disorder. *Biological Psychiatry*. 1997 Jan;41(2):184-190.

#### **23. Bakish 2014 (LVM-MD-10, NCT01377194)**

- Bakish D, Bose A, Gommoll C, Chen C, Nunez R, Greenberg WM, Liebowitz M, Khan A. Levomilnacipran ER 40 mg and 80 mg in patients with major depressive disorder: a phase III, randomized, double-blind, fixed-dose, placebo-controlled study. *J Psychiatry Neurosci*. 2014 Jan;39(1):40-9.
- <https://clinicaltrials.gov/ct2/show/NCT01377194>

#### **24. Baldwin 1996**

- Baldwin DS, Hawley CJ, Abed RT, Maragakis BP, Cox J, Buckingham SA, Pover GH, Ascher A. A multicenter double-blind comparison of nefazodone and paroxetine in the treatment of outpatients with moderate-to-severe depression. *J Clin Psychiatry*. 1996;57 Suppl 2:46-52.

#### **25. Baldwin 2006a (97-CRBX-052 - Study 052)**

- Baldwin D, Bridgman K, Buis C. Resolution of sexual dysfunction during double-blind treatment of major depression with reboxetine or paroxetine. *J Psychopharmacol*. 2006 Jan;20(1):91-6. Epub 2005 Oct 4.
- [https://www.iqwig.de/download/Studie\\_052.pdf](https://www.iqwig.de/download/Studie_052.pdf)

#### **26. Baldwin 2006b (Study 99505)**

- Baldwin DS, Cooper JA, Huusom AK, Hindmarch I. A double-blind, randomized, parallel-group, flexible-dose study to evaluate the tolerability, efficacy and effects of treatment discontinuation with escitalopram and paroxetine in patients with major depressive disorder. *Int Clin Psychopharmacol*. 2006 May;21(3):159-69.
- [http://www.lundbeck.com/upload/trials/files/pdf/completed/99505%20\\_14June2006\\_Final%20for%20upload\\_CTRS.pdf](http://www.lundbeck.com/upload/trials/files/pdf/completed/99505%20_14June2006_Final%20for%20upload_CTRS.pdf)

#### **27. Baldwin 2012 (11984A, NCT00635219)**

- Baldwin DS, Loft H, Dragheim M. A randomised, double-blind, placebo controlled, duloxetine-referenced, fixed-dose study of three dosages of Lu AA21004 in acute treatment of major depressive disorder (MDD). *Eur Neuropsychopharmacol*. 2012 Jul;22(7):482-91.
- <https://clinicaltrials.gov/ct2/show/NCT00635219>

#### **28. Ban 1998 (Study 008)**

- Ban TA, Gaszner P, Aguglia E, Vergara L. Clinical Efficacy of Reboxetine: a Comparative Study with Desipramine, with Methodological Considerations. *Human Psychopharmacology* 1998;13: S29-S39.
- <https://www.iqwig.de/de/projekte-ergebnisse/studieninformationen-zu-reboxetin.3304.html>

#### **29. Barber 2011**

- Barber JP, Barrett MS, Gallop R, Rynn MA, Rickels K. Short-term dynamic psychotherapy versus pharmacotherapy for major depressive disorder: a randomized, placebo-controlled trial. *J Clin Psychiatry*. 2012 Jan;73(1):66-73.

#### **30. Bategay 1985 (PAR 29060.309 HP/81/162A)**

- Bategay R, Hager M, Rauchfleisch U. Double-blind comparative study of paroxetine and amitriptyline in depressed patients of a university psychiatric outpatient clinic (pilot study). *Neuropsychobiology*. 1985;13(1-2):31-7.
- <https://www.gsk-clinicalstudyregister.com/study/29060/309?search=compound&compound=paroxetine#rs>

**31. Beasley 1991**

- Beasley CM Jr, Dornseif BE, Pultz JA, Bosomworth JC, Sayler ME. Fluoxetine versus trazodone: efficacy and activating-sedating effects. *J Clin Psychiatry*. 1991 Jul;52:294-9.

**32. Behnke 2003 (E-1690, Kjernisted2002)**

- Behnke K, Søgaard J, Martin S, Bäuml J, Ravindran AV, Agren H, Vester-Blokland ED. Mirtazapine orally disintegrating tablet versus sertraline: a prospective onset of action study. *J Clin Psychopharmacol*. 2003 Aug;23(4):358-64.

**33. Benkert 2000 (E-1559)**

- Benkert O, Szegedi A, Kohlen R. Mirtazapine compared with paroxetine in major depression. *J Clin Psychiatry*. 2000 Sep;61(9):656-63.

**34. Benkert 2006(C-1763)**

- [https://www.iqwig.de/download/A05-20C\\_Abschlussbericht\\_Bupropion\\_Mirtazapin\\_und\\_Reboxetin\\_bei\\_Depressionen.pdf](https://www.iqwig.de/download/A05-20C_Abschlussbericht_Bupropion_Mirtazapin_und_Reboxetin_bei_Depressionen.pdf)

**35. Bennie 1995**

- Bennie EH, Mullin JM, Martindale JJ. A double-blind multicentre trial comparing sertraline and fluoxetine in outpatients with major depression. *J Clin Psychiatry*. 1995 Jun;56(6):229-37.

**36. Berlanga 1997**

- Berlanga C, Arechavaleta B, Heinze G, Campillo C, Torres M, Caballero A, Apiquián R, Castelli P. A double-blind comparison of nefazodone and fluoxetine in the treatment of depressed outpatients. *Salud Mental*. 1997;20(3):1-8.

**37. Berlanga 2006**

- Berlanga C, Flores-Ramos M. Different gender response to serotonergic and noradrenergic antidepressants. A comparative study of the efficacy of citalopram and reboxetine. *J Affect Disord*. 2006 Oct;95(1-3):119-23.

**38. Bersani 1994**

- Bersani G, Rapisarda V, Ciani N, Bertolino A, Sorge G. A double-blind comparative study of sertraline and amitriptyline in outpatients with major depressive episodes. *Human Psychopharmacology: Clinical and Experimental*. 1994;9(1):63-68.

**39. Bhatia 1991**

- Bhatia SC, Hsieh HH, Theesen KA, Townley RG, Andersen JM, Weiss S, Agrawal DK. Platelet alpha-2 adrenoceptor activity pre-treatment and post-treatment in major depressive disorder with melancholia. *Res Commun Chem Pathol Pharmacol*. 1991 Oct;74(1):47-57.

**40. Bielski 2004 (SCT-MD-12)**

- Bielski RJ, Ventura D, Chang CC. A double-blind comparison of escitalopram and venlafaxine extended release in the treatment of major depressive disorder. *J Clin Psychiatry*. 2004 Sep;65(9):1190-6.

**41. Bignamini 1992 (PAR 29060/078)**

- Bignamini A, Rapisarda V. A double-blind multicentre study of paroxetine and amitriptyline in depressed outpatients. Italian Paroxetine Study Group. *Int Clin Psychopharmacol.* 1992 Jun;6 Suppl 4:37-41.
- <https://www.gsk-clinicalstudyregister.com/study/29060/078#rs>

**42. Binnemann 2008 (NCT00143091)**

- Binneman B, Feltner D, Kolluri S, Shi Y, Qiu R, Stiger T. A 6-week randomized, placebo-controlled trial of CP-316,311 (a selective CRH1 antagonist) in the treatment of major depression. *Am J Psychiatry.* 2008;165(5):617-20.

**43. Bjerkenstedt 2005**

- Bjerkenstedt L1, Edman GV, Alken RG, Mannel M. Hypericum extract LI 160 and fluoxetine in mild to moderate depression: a randomized, placebo-controlled multi-center study in outpatients. *Eur Arch Psychiatry Clin Neurosci.* 2005 Feb;255(1):40-7.

**44. Blacker 1988**

- Blacker R, Shanks NJ, Chapman N, Davey A. The drug treatment of depression in general practice: a comparison of nocte administration of trazodone with mianserin, dothiepin and amitriptyline. *Psychopharmacology.* 1988;95 Suppl:S18-24.

**45. Bosc 1997a (Study 014 – Andreoli 2002)**

- Andreoli V, Caillard V, Deo RS, Rybakowski JK, Versiani M. Reboxetine, a new noradrenaline selective antidepressant, is at least as effective as fluoxetine in the treatment of depression. *J Clin Psychopharm* 2002; 22: 393–99.

**46. Bosc 1997b (Study 016 - Massana 1999)**

- Massana J, Möller HJ, Burrows GD, Montenegro RM. Reboxetine: a double-blind comparison with fluoxetine in major depressive disorder. *Int Clin Psychopharmacol.* 1999 Mar;14(2):73-80.
- [https://www.iqwig.de/download/Studienbericht\\_zu\\_Studie\\_016.pdf](https://www.iqwig.de/download/Studienbericht_zu_Studie_016.pdf)

**47. Bose 2008 (SCT-MD-13)**

- Bose A, Li D, Gandhi C. Escitalopram in the Acute Treatment of Depressed Patients Aged 60 Years or Older. *Am J Geriatric Psychiatry.* 2008 Jan;16(1):14-20.

**48. Bougerol 1997 (Study 91302 - FDA)**

- Bougerol T, Scotto JC, Patris M, Strut N, Lemming O, Petersen HEH. Citalopram and Fluoxetine in Major Depression. Comparison of Two Clinical Trials in a Psychiatrist Setting and in General Practice. *Clin. Drug Investig.* 1997;14(2):77-89.

**49. Boulenger 2006 (Study 10351)**

- Boulenger JP, Huusom AK, Florea I, Baekdal T, Sarchiapone M. A comparative study of the efficacy of long-term treatment with escitalopram and paroxetine in severely depressed patients. *Curr Med Res Opin.* 2006 Jul;22(7):1331-41.
- [http://www.lundbeck.com/upload/trials/files/pdf/completed/10351\\_Final%20for%20upload\\_28Feb2007\\_CTRS.pdf](http://www.lundbeck.com/upload/trials/files/pdf/completed/10351_Final%20for%20upload_28Feb2007_CTRS.pdf)

**50. Boulenger 2014 (13267A, NCT01140906)**

- Boulenger JP, Loft H, Olsen CK. Efficacy and safety of vortioxetine (Lu AA21004), 15 and 20 mg/day: a randomized, double-blind, placebo-controlled, duloxetine-referenced study in the acute treatment of adult patients with major depressive disorder. *Int Clin Psychopharmacol.* 2014;29(3):138-49.
- <https://clinicaltrials.gov/ct2/show/NCT01140906>

**51. Boyer 2008 (Study 333, NCT00300378, EUCTR2005-005463-28, 3151A1-333-EU)**

- Boyer P, Montgomery S, Lepola U, Germain JM, Brisard C, Ganguly R, Padmanabhan SK, Tourian KA. Efficacy, safety, and tolerability of fixed-dose desvenlafaxine 50 and 100 mg/day for major depressive disorder in a placebo-controlled trial. *Int Clin Psychopharmacol.* 2008;23(5):243-53.
- <https://clinicaltrials.gov/ct2/show/NCT00300378>

**52. Bremner 1995 (MIR 003-022 - FDA)**

- Bremner JD. A double-blind comparison of Org 3770, amitriptyline, and placebo in major depression. *J Clin Psychiatry.* 1995 Nov;56(11):519-25.

**53. Brown 1986**

- Brown WA, Arato M, Shrivastava R. Pituitary-adrenocortical hyperfunction and intolerance to fluvoxamine, a selective serotonin uptake inhibitor. *Am J Psychiatry.* 1986 Jan;143(1):88-90.

**54. Brunoni 2012**

- Brunoni AR, Valiengo L, Baccaro A, Zanão TA, de Oliveira JF, Goulart A, Boggio PS, Lotufo PA, Benseñor IM, Fregni F. The sertraline vs. electrical current therapy for treating depression clinical study: results from a factorial, randomized, controlled trial. *JAMA Psychiatry.* 2013;70(4):383-91.

**55. Buchsbaum 1997**

- Buchsbaum MS, Wu J, Siegel BV, Hackett E, Trenary M, Abel L, Reynolds C. Effect of sertraline on regional metabolic rate in patients with affective disorder. *Biol Psychiatry.* 1997 Jan 1;41(1):15-22.

**56. Bueno 1997**

- Bueno JR, Mattos P. Estudo duplo-cego comparativo da eficacia e seguranca da nefazodona e amitriptilina. *J Bras Psiquiat.* 1997;7(46):385-389.

**57. Burke 2002 (SCT-MD-01)**

- Burke WJ, Gergel I, Bose A. Fixed-dose trial of the single isomer SSRI escitalopram in depressed outpatients. *J Clin Psychiatry.* 2002 Apr;63(4):331-6

**58. Byerley 1988**

- Byerley WF, Reimherr FW, Wood DR, Grosser BI. Fluoxetine, a selective serotonin uptake inhibitor, for the treatment of outpatients with major depression. *J Clin Psychopharmacol.* 1988;8(2):112-5.

**59. CAGO178A2303 (NCT00463242)**

- <https://clinicaltrials.gov/ct2/show/record/NCT00463242>

**60. Caligiuri 2003**

- Caligiuri MP, Gentili V, Ebersson S, Kelsoe J, Rapaport M, Gillin JC. A quantitative neuromotor predictor of antidepressant non-response in patients with major depression. *J Affect Disord.* 2003 Nov;77(2):135-41.

**61. Carman 1991**

- Carman JS, Ahdieh H, Wyatt-Knowles E, Warga E, Panagides J. A controlled study of mianserin in moderately to severely depressed outpatients. *Psychopharmacol Bull.* 1991;27(2):135-9.

**62. Casabona 2002 (0600B 428)**

- Casabona GM, Silenzi V, Guazzelli M. A randomized, double blind, comparison of venlafaxine ER and paroxetine in outpatients with moderate to severe major depression. *Eur Neuropsychopharm.* 2002;12(Supp3):208.

**63. Cassano 1986**

- Cassano GB, Conti L, Massimetti G, Mengali F, Waekelin JS, Levine J. Use of a standardized documentation system (BLIPS/BDP) in the conduct of a multicenter international trial comparing fluvoxamine, imipramine, and placebo. *Psychopharmacol Bull.* 1986;22(1):52-8.

**64. Cassano 2002 (29060/421)**

- Cassano GB, Puca F, Scapicchio PL, Trabucchi M; Italian Study Group on Depression in Elderly Patients. Paroxetine and fluoxetine effects on mood and cognitive functions in depressed nondemented elderly patients. *J Clin Psychiatry.* 2002 May;63(5):396-402.
- <https://www.gsk-clinicalstudyregister.com/study/29060/421?search=compound&compound=paroxetine#rs>

**65. Chang 2015**

- Chang HH, Chou CH, Yang YK, Lee IH, Chen PS. Association between ABCB1 Polymorphisms and Antidepressant Treatment Response in Taiwanese Major Depressive Patients. *Clin Psychopharmacol Neurosci.* 2015 Dec 31;13(3):250-5. doi: 10.9758/cpn.2015.13.3.250.

**66. Chouinard 1983a**

- Chouinard G. Bupropion and amitriptyline in the treatment of depressed patients. *J Clin Psychiatry.* 1983 May;44(5 Pt 2):121-9.

**67. Chouinard 1985**

- Chouinard G. A double-blind controlled clinical trial of fluoxetine and amitriptyline in the treatment of outpatients with major depressive disorder. *J Clin Psychiatry.* 1985 Mar;46(3 Pt 2):32-7.

**68. Chouinard 1999 (29060/131)**

- Chouinard G1, Saxena B, Bélanger MC, Ravindran A, Bakish D, Beauclair L, Morris P, Vasavan Nair NP, Manchanda R, Reesal R, Remick R, O'Neill MC. A Canadian multicenter, double-blind study of paroxetine and fluoxetine in major depressive disorder. *J Affect Disord.* 1999 Jul;54(1-2):39-48.
- <https://www.gsk-clinicalstudyregister.com/study/29060/131#rs>

**69. Christiansen 1996**

- Christiansen PE1, Behnke K, Black CH, Ohrström JK, Bork-Rasmussen H, Nilsson J. Paroxetine and amitriptyline in the treatment of depression in general practice. *Acta Psychiatr Scand.* 1996 Mar;93(3):158-63.

**70. CL3-20098-022**

- [http://www.ema.europa.eu/docs/en\\_GB/document\\_library/EPAR\\_-\\_Public\\_assessment\\_report/human/000916/WC500038315.pdf](http://www.ema.europa.eu/docs/en_GB/document_library/EPAR_-_Public_assessment_report/human/000916/WC500038315.pdf)

**71. CL3-20098-023**

- [http://www.ema.europa.eu/docs/en\\_GB/document\\_library/EPAR\\_-\\_Public\\_assessment\\_report/human/000915/WC500046226.pdf](http://www.ema.europa.eu/docs/en_GB/document_library/EPAR_-_Public_assessment_report/human/000915/WC500046226.pdf)

**72. CL3-20098-024**

- [http://www.ema.europa.eu/docs/en\\_GB/document\\_library/EPAR\\_-\\_Public\\_assessment\\_report/human/000916/WC500038315.pdf](http://www.ema.europa.eu/docs/en_GB/document_library/EPAR_-_Public_assessment_report/human/000916/WC500038315.pdf)

**73. CL3-20098-026**

- [http://www.ema.europa.eu/docs/en\\_GB/document\\_library/EPAR\\_-\\_Public\\_assessment\\_report/human/000916/WC500038315.pdf](http://www.ema.europa.eu/docs/en_GB/document_library/EPAR_-_Public_assessment_report/human/000916/WC500038315.pdf)

**74. CL3-20098-036**

- Unpublished data provided from Servier upon request.

**75. CL3-20098-048**

- [https://www.clinicaltrialsregister.eu/ctr-search/search?query=eudract\\_number:2005-002388-95](https://www.clinicaltrialsregister.eu/ctr-search/search?query=eudract_number:2005-002388-95)

**76. CL3-20098-062**

- <https://www.clinicaltrialsregister.eu/ctr-search/search?query=2008-004642-92>

**77. CL3-20098-070**

- <https://www.clinicaltrialsregister.eu/ctr-search/trial/2009-011795-29/FI>

**78. Claghorn 1983**

- Claghorn J, Gershon S, Goldstein BJ. Zimeldine tolerability in comparison to amitriptyline and placebo. *Acta Psychiatr Scand Suppl.* 1983;308:104-14.

**79. Claghorn 1995 (MIR 003-002 (FDA))**

- Claghorn JL, Lesem MD. A double-blind placebo-controlled study of Org 3770 in depressed outpatients. *J Affect Disord.* 1995 Jun 8;34(3):165-71.

**80. Claghorn 1996**

- Claghorn JL, Earl CQ, Walczak DD, Stoner KA, Wong LF, Kanter D, Houser VP. Fluvoxamine maleate in the treatment of depression: a single-center, double-blind, placebo-controlled comparison with imipramine in outpatients. *J Clin Psychopharmacol*. 1996 Apr;16(2):113-20.

**81. Clayton 2003 (Study 050)**

- Clayton AH, Zajecka J, Ferguson JM, Filipiak-Reisner JK, Brown MT, Schwartz GE. Lack of sexual dysfunction with the selective noradrenaline reuptake inhibitor reboxetine during treatment for major depressive disorder. *Int Clin Psychopharmacol*. 2003;18(3):151-6.
- <https://www.iqwig.de/de/projekte-ergebnisse/studieninformationen-zu-reboxetin.3304.html>

**82. Clayton 2006a (WELL AK130926)**

- Clayton AH, Croft H, Horrigan JP, et al. Bupropion XL compared with escitalopram: effects on sexual functioning and antidepressant efficacy in two randomized, double-blind, placebo controlled studies. *J Clin Psychiatry* 2006; 67: 736–46.
- <https://www.gsk-clinicalstudyregister.com/files2/20466.pdf>

**83. Clayton 2006b (WELL AK130927)**

- Clayton AH, Croft H, Horrigan JP, et al. Bupropion XL compared with escitalopram: effects on sexual functioning and antidepressant efficacy in two randomized, double-blind, placebo controlled studies. *J Clin Psychiatry* 2006; 67: 736–46.
- <https://www.gsk-clinicalstudyregister.com/files2/20467.pdf>

**84. Clayton 2013 (NCT01121484)**

- Clayton AH, Kornstein SG, Dunlop BW, Focht K, Musgnung J, Ramey T, Bao W, Ninan PT. Efficacy and safety of desvenlafaxine 50 mg/d in a randomized, placebo-controlled study of perimenopausal and postmenopausal women with major depressive disorder. *J Clin Psychiatry*. 2013 Oct;74(10):1010-7.
- <https://clinicaltrials.gov/ct2/show/NCT01121484>

**85. Clayton 2015 (NCT01432457)**

- Clayton AH, Tourian KA, Focht K, Hwang E, Cheng RF, Thase ME. Desvenlafaxine 50 and 100 mg/d versus placebo for the treatment of major depressive disorder: a phase 4, randomized controlled trial. *J Clin Psychiatry*. 2015 May;76(5):562-9.
- <https://clinicaltrials.gov/show/NCT01432457>

**86. Clerc 1994**

- Clerc GE, Ruimy P, Verdeau-Pallès J. A double-blind comparison of venlafaxine and fluoxetine in patients hospitalized for major depression and melancholia. The Venlafaxine French Inpatient Study Group. *Int Clin Psychopharmacol*. 1994 Sep;9(3):139-43.



**87. Clerc 2001**

- Clerc G; Milnacipran/Fluvoxamine Study Group. Antidepressant efficacy and tolerability of milnacipran, a dual serotonin and noradrenaline reuptake inhibitor: a comparison with fluvoxamine. *Int Clin Psychopharmacol.* 2001 May;16(3):145-51.

**88. CN104-002 (FDA)**

- <http://digitalcommons.ohsu.edu/fdadrug/23/>

**89. CN104-045 (FDA)**

- <http://digitalcommons.ohsu.edu/fdadrug/23/>

**90. CN104-054 (FDA)**

- <http://digitalcommons.ohsu.edu/fdadrug/23/>

**91. Cohn 1985a**

- Cohn JB, Wilcox C. A comparison of fluoxetine, imipramine, and placebo in patients with major depressive disorder. *J Clin Psychiatry.* 1985 Mar;46(3 Pt 2):26-31.

**92. Cohn 1990**

- Cohn CK, Shrivastava R, Mendels J, Cohn JB, Fabre LF, Claghorn JL, Dessain EC, Itil TM, Laitin A. Double-blind, multicenter comparison of sertraline and amitriptyline in elderly depressed patients. *J Clin Psychiatry.* 1990 Dec;51 Suppl B:28-33.

**93. Cohn 1996 (FDA CN104-006-2)**

- Cohn CK, Robinson DS, Roberts DL, Schwiderski UE, O'Brien K, Ieni JR. Responders to antidepressant drug treatment: a study comparing nefazodone, imipramine, and placebo in patients with major depression. *J Clin Psychiatry.* 1996;57 Suppl 2:15-8.
- <http://digitalcommons.ohsu.edu/fdadrug/23/>

**94. Coleman 1999 (AK1A4002)**

- Coleman CC, Cunningham LA, Foster VJ, et al. Sexual dysfunction associated with the treatment of depression: a placebo-controlled comparison of bupropion sustained release and sertraline treatment. *Ann Clin Psychiatry* 1999; 11: 205–15.
- <http://www.gsk-clinicalstudyregister.com/study/AK1A4002#rs>

**95. Coleman 2001 (AK1A4007)**

- Coleman CC, King BR, Bolden-Watson C, et al. A placebo-controlled comparison of the effects on sexual functioning of bupropion sustained release and fluoxetine. *Clin Ther* 2001; 23: 1040–58.
- <http://www.gsk-clinicalstudyregister.com/study/AK1A4007#rs>

**96. Colonna 2005 (Study 99022)**

- Colonna L, Andersen HF, Reines EH. A randomized, double-blind, 24-week study of escitalopram (10 mg/day) versus citalopram (20 mg/day) in primary care patients with major depressive disorder. *Curr Med Res Opin.* 2005 Oct;21(10):1659-68.
- [http://www.lundbeck.com/upload/trials/files/pdf/completed/99022\\_CTRS\\_final\\_30Dec2005.pdf](http://www.lundbeck.com/upload/trials/files/pdf/completed/99022_CTRS_final_30Dec2005.pdf)

**97. Corrigan 2000**

- Corrigan MH, Denahan AQ, Wright CE, Ragual RJ, Evans DL. Comparison of pramipexole, fluoxetine, and placebo in patients with major depression. *Depress Anxiety* 2000;11(2):58-65.

**98. Corruble 2013 (CL3-20098-063)**

- Corruble E, de Bodinat C, Belaïdi C, Goodwin GM; agomelatine study group. Efficacy of agomelatine and escitalopram on depression, subjective sleep and emotional experiences in patients with major depressive disorder: a 24-wk randomized, controlled, double-blind trial. *Int J Neuropsychopharmacol.* 2013 Nov;16(10):2219-34.
- <https://www.clinicaltrialsregister.eu/ctr-search/trial/2006-006540-54/results>

**99. Costaesilva 1998**

- Costa e Silva J. Randomized, double-blind comparison of venlafaxine and fluoxetine in outpatients with major depression. *J Clin Psychiatry.* 1998 Jul;59(7):352-7.

**100. Croft 1999 (AK1A4001)**

- Croft H, Settle E Jr, Houser T, Batey SR, Donahue RMJ, Ascher JA. A placebo-controlled comparison of the antidepressant efficacy and effects on sexual functioning of sustained-release bupropion and sertraline. *Clin Ther* 1999; 21: 643–58.
- <http://www.gsk-clinicalstudyregister.com/study/AK1A4001#rs>

**101. Croft 2014 (NCT01473394)**

- Croft HA, Pomara N, Gommoll C, Chen D, Nunez R, Mathews M. Efficacy and safety of vilazodone in major depressive disorder: a randomized, double-blind, placebo-controlled trial. *J Clin Psychiatry.* 2014 Nov;75(11):e1291-8.
- <https://clinicaltrials.gov/ct2/show/NCT01473394>

**102. Cunningham 1994 (VEN 600A-302 FDA)**

- Cunningham LA, Borison RL, Carman JS, Chouinard G, Crowder JE, Diamond BI, Fischer DE, Hearst E. A comparison of venlafaxine, trazodone, and placebo in major depression. *J Clin Psychopharmacol.* 1994 Apr;14(2):99-106.
- <http://digitalcommons.ohsu.edu/fdadrug/24/>

**103. Cunningham 1997 (VEN XR 208 - FDA)**

- Cunningham LA. Once-daily venlafaxine extended release (XR) and venlafaxine immediate release (IR) in outpatients with major depression. Venlafaxine XR 208 Study Group. *Ann Clin Psychiatry.* 1997 Sep;9(3):157-64.
- <http://digitalcommons.ohsu.edu/fdadrug/25/>

**104. Cutler 2009**

- Cutler AJ, Montgomery SA, Feifel D, Lazarus A, Aström M, Brecher M. Extended release quetiapine fumarate monotherapy in major depressive disorder: a placebo- and duloxetine-controlled study. *J Clin Psychiatry.* 2009 Apr;70(4):526-39.

### **105. Dalery 2003**

- Dalery J, Honig A. Fluvoxamine versus fluoxetine in major depressive episode: a double-blind randomised comparison. *Hum Psychopharmacol*. 2003 Jul;18(5):379-84.

### **106. D'Amico 1990 (FDA 030-A2-0007)**

- D'Amico MF, Roberts DL, Robinson DS, Schwiderski UE, Copp J. Placebo-controlled dose-ranging trial designs in phase II development of nefazodone. *Psychopharmacol Bull*. 1990;26(1):147-50.
- <http://digitalcommons.ohsu.edu/fdadrug/23/>

### **107. Davidson 2002 (HDTSG, NCT00005013)**

- Hypericum Depression Trial Study Group. Effect of Hypericum perforatum (St John's wort) in major depressive disorder: a randomized controlled trial. *JAMA*. 2002 Apr 10;287(14):1807-14.
- <https://www.clinicaltrials.gov/ct2/show/NCT00005013>

### **108. Debonnel 2000 (Blier2009, iQWIG E-1639)**

- Blier P, Gobbi G, Turcotte JE, de Montigny C, Boucher N, Hébert C, Debonnel G. Mirtazapine and paroxetine in major depression: a comparison of monotherapy versus their combination from treatment initiation. *Eur Neuropsychopharmacol*. 2009 Jul;19(7):457-65.
- [https://www.iqwig.de/download/A05-20C\\_Abschlussbericht\\_1-1\\_Bupropion\\_Mirtazapin\\_und\\_Reboxetin\\_bei\\_Depressionen.pdf](https://www.iqwig.de/download/A05-20C_Abschlussbericht_1-1_Bupropion_Mirtazapin_und_Reboxetin_bei_Depressionen.pdf)

### **109. Debus 1988**

- Debus JR, Rush AJ, Himmel C, et al. Fluoxetine versus trazodone in the treatment of outpatients with major depression. *J Clin Psychiatry* 1988;49:422-6.

### **110. DeMartinis 2007 (Study 306, NCT00072774)**

- DeMartinis NA, Yeung PP, Entsua R, Manley AL. A double-blind, placebo-controlled study of the efficacy and safety of desvenlafaxine succinate in the treatment of major depressive disorder. *J Clin Psychiatry*. 2007 May;68(5):677-88.
- [http://www.accessdata.fda.gov/drugsatfda\\_docs/nda/2008/021992s000TOC.cfm](http://www.accessdata.fda.gov/drugsatfda_docs/nda/2008/021992s000TOC.cfm)
- <https://clinicaltrials.gov/ct2/show/NCT00072774>

### **111. Demyttenaere 1998**

- Demyttenaere K, Van Ganse E, Gregoire J, Gaens E, Mesters P. Compliance in depressed patients treated with fluoxetine or amitriptyline. Belgian Compliance Study Group. *Int Clin Psychopharmacol*. 1998 Jan;13(1):11-7.

### **112. DeRonchi 1998**

- De Ronchi D, Rucci P, Lodi M, Ravaglia G, Forti P, Volterra V. Fluoxetine and amitriptyline in elderly depressed patients. A 10-week, double-blind study on course of neurocognitive adverse events and depressive symptoms. *Arch. Gerontology and Geriatrics*. 1998;26(Supp 1):125-140.

**113. Detke 2002a (HMBH - Study Group A)**

- Detke MJ, Lu Y, Goldstein DJ, Hayes JR, Demitrack MA. Duloxetine, 60 mg once daily, for major depressive disorder: a randomized double-blind placebo-controlled trial. *J Clin Psychiatry*. 2002 Apr;63(4):308-15.

**114. Detke 2002b (HMBH - Study Group B)**

- Detke MJ, Lu Y, Goldstein D, McNamara R, Demitrack M. Duloxetine 60 mg once daily dosing versus placebo in the acute treatment of major depression. *J Psychiatr Res* 2002;36:383-90.

**115. Detke 2004 (HMAy Study Group A)**

- Detke MJ, Wiltse CG, Mallinckrodt CH, McNamara RK, Demitrack MA, Bitter I. Duloxetine in the acute and long-term treatment of major depressive disorder: a placebo- and paroxetine-controlled trial. *Eur Neuropsychopharmacol* 2004; 14: 457–70.
- <http://www.lillytrials.com/results/Cymbalta.pdf>

**116. Deuschle 2003 (NCT01049347)**

- Deuschle M, Hamann B, Meichel C, Krumm B, Lederbogen F, Kniest A, Colla M, Heuser I. Antidepressive treatment with amitriptyline and paroxetine: effects on saliva cortisol concentrations. *J Clin Psychopharmacol*. 2003 Apr;23(2):201-5.
- <https://clinicaltrials.gov/ct2/show/study/NCT01049347>

**117. DeWilde 1983a**

- De Wilde JE, Mertens C, Wakelin JS. Clinical trials of fluvoxamine vs chlorimipramine with single and three times daily dosing. *Br J Clin Pharmacol*. 1983;15 Suppl 3:427S-431S.

**118. DeWilde 1993**

- De Wilde J, Spiers R, Mertens C, Bartholomé F, Schotte G, Leyman S. A double-blind, comparative, multicentre study comparing paroxetine with fluoxetine in depressed patients. *Acta Psychiatr Scand*. 1993 Feb;87(2):141-5.
- <https://www.gsk-clinicalstudyregister.com/files2/1992.pdf>

**119. Dierick 1996**

- Dierick M, Ravizza L, Realini R, Martin A. A double-blind comparison of venlafaxine and fluoxetine for treatment of major depression in outpatients. *Prog Neuropsychopharmacol Biol Psychiatry*. 1996 Jan;20(1):57-71.

**120. Dimidjian 2006**

- Dimidjian S, Hollon SD, Dobson KS, Schmaling KB, Kohlenberg RJ, Addis ME, Gallop R, McGlinchey JB, Markley DK, Gollan JK, Atkins DC, Dunner DL, Jacobson NS. Randomized trial of behavioral activation, cognitive therapy, and antidepressant medication in the acute treatment of adults with major depression. *J Consult Clin Psychol*. 2006 Aug;74(4):658-70.

**121. Dominguez 1985**

- Dominguez RA, Goldstein BJ, Jacobson AF, Steinbook RM. A double-blind placebo-controlled study of fluvoxamine and imipramine in depression. *J Clin Psychiatry*. 1985;46(3):84-7.

**122. Doogan 1994**

- Doogan D, Langdon C. Double-blind, placebo-controlled comparison of sertraline and dothiepin in treatment of major depression in general practice. *Int Clin Psychopharmacol* 1994;9:95-100.

**123. DUAG 1990**

- Danish University Antidepressant Group. Paroxetine: a selective serotonin reuptake inhibitor showing better tolerance, but weaker antidepressant effect than clomipramine in a controlled multicenter study. *J Affect Disord*. 1990 Apr;18(4):289-99.

**124. Dube 2010 (NCT00420004)**

- Dubé S, Dellva MA, Jones M, Kielbasa W, Padich R, Saha A, Rao P. A study of the effects of LY2216684, a selective norepinephrine reuptake inhibitor, in the treatment of major depression. *J Psychiatr Res*. 2010 Apr;44(6):356-63
- <https://clinicaltrials.gov/ct2/show/NCT00420004>

**125. Dunbar 1993a (Claghorn1992, Rickels1989, Rickels1992, PAR 02-001 - FDA)**

- Claghorn JL. The safety and efficacy of paroxetine compared with placebo in a double-blind trial of depressed outpatients. *J Clin Psychiatry*. 1992 Feb;53 Suppl:33-5.
- <http://digitalcommons.ohsu.edu/fdadrug/26/>

**126. Dunbar 1993b (Claghorn1992, PAR 02-002 - FDA)**

- Dunbar GC, Claghorn JL, Kiev A, Rickels K, Smith WT. A comparison of paroxetine and placebo in depressed outpatients. *Acta Psychiatr Scand*. 1993;87(5):302-5
- <http://digitalcommons.ohsu.edu/fdadrug/26/>

**127. Dunbar 1993c (Smith1992, PAR 02-003 - FDA)**

- Smith WT, Glaudin V. A placebo-controlled trial of paroxetine in the treatment of major depression. *J Clin Psychiatry*. 1992;53 Suppl:36-9.
- <http://digitalcommons.ohsu.edu/fdadrug/26/>

**128. Dunbar 1993d (Kiev1992, PAR 02-004 - FDA)**

- Kiev A. A double-blind, placebo-controlled study of paroxetine in depressed outpatients. *J Clin Psychiatry*. 1992;53 Suppl:27-9.
- <http://digitalcommons.ohsu.edu/fdadrug/26/>

**129. Dunlop 2011 (NCT00824291)**

- Dunlop BW, Reddy S, Yang L, Lubaczewski S, Focht K, Guico-Pabia CJ. Symptomatic and functional improvement in employed depressed patients: a double-blind clinical trial of desvenlafaxine versus placebo. *J Clin Psychopharmacol*. 2011 Oct;31(5):569-76.
- <https://clinicaltrials.gov/ct2/show/NCT00824291>

**130. Dunner 1992 (PAR 29060.09)**

- Dunner DL, Dunbar GC. Optimal dose regimen for paroxetine. *J Clin Psychiatry*. 1992;53 Suppl:21-6.
- <http://www.gsk-clinicalstudyregister.com/study/29060/009#rs>

**131. E-1569**

- [https://www.iqwig.de/download/A05-20C\\_Abschlussbericht\\_1-1\\_Bupropion\\_Mirtazapin\\_und\\_Reboxetin\\_bei\\_Depressionen.pdf](https://www.iqwig.de/download/A05-20C_Abschlussbericht_1-1_Bupropion_Mirtazapin_und_Reboxetin_bei_Depressionen.pdf)

**132. Edwards 1989 (MD/PAR/009 PAR-276)**

- Edwards JG, Goldie A. Placebo-controlled trial of paroxetine in depressive illness. *Human Psychopharmacology* 1993;8:203-209
- <http://www.gsk-clinicalstudyregister.com/study/29060/276?search=compound&compound=paroxetine#rs>

**133. Ekselius 1997**

- Ekselius L, von Knorring L. Personality disorder comorbidity with major depression and response to treatment with sertraline or citalopram. *Int Clin Psychopharmacol*. 1998 Sep;13(5):205-11.

**134. Faber 1995 (SER 103 FDA)**

- Fabre L, Abuzzahab F, Amin M, Claghorn J, Mendels J, Dubé S, Small JG. Sertraline in major depression: double-blind comparison with placebo. *Biol Psychiatry* 1995;38:592-602.
- <http://digitalcommons.ohsu.edu/fdadrug/27/>

**135. Fabre 1979**

- Fabre LF, McLendon DM, Gainey A. Trazodone efficacy in depression: a double-blind comparison with imipramine and placebo in day-hospital type patients. *Current Therapeutic research* 1979;25:827-834

**136. Fabre 1996**

- Fabre L, Birkhimer L, Zaborny B, Wong L, Kapik B. Fluvoxamine vs imipramine and placebo: a double-blind comparison in depressed patients. *Int Clin Psychopharmacol* 1996;11:119-27.

**137. Falk 1989**

- Falk WE, Rosenbaum JF, Otto MW, Zusky PM, Weilburg JB, Nixon RA. Fluoxetine versus trazodone in depressed geriatric patients. *J Geriatr Psychiatry Neurol*. 1989 Oct-Dec;2(4):208-14.

**138. Fang 1997 (Yu 1997)**

- Fang Y, Wang Z, Sheng J, Xie B, Da Z, Gao Z, Shi Q. Fluoxetine vs amitriptyline in treating 105 patients with depressive disorder with a double-blind study. *New Drugs and Clinical Remedies* 1997 July 16(4):254-256. (in Chinese)
- Yu B, Zhou R, Zhang F. Fluoxetine and amitriptyline for treating 22 patients of depressive disorder: a double blind controlled study. *New Drugs and Clinical Remedies* 1997 16(4):J23-J24.

**139. Fava 1998**

- Fava M, Amsterdam JD, Deltito JA. A double-blind study of paroxetine, fluoxetine, and placebo in outpatients with major depression. *Ann Clin Psychiatry* 1998; 10: 145–50.

**140. Fava 2002**

- Fava M, Hoog SL, Judge RA, Kopp JB, Nilsson ME, Gonzales JS. Acute efficacy of fluoxetine versus sertraline and paroxetine in major depressive disorder including effects of baseline insomnia. *J Clin Psychopharmacol.* 2002 Apr;22(2):137-47.

**141. Fava 2005**

- Fava M, Alpert J, Nierenberg AA, Mischoulon D, Otto MW, Zajecka J, Murck H, Rosenbaum JF. A Double-blind, randomized trial of St John's wort, fluoxetine, and placebo in major depressive disorder. *J Clin Psychopharmacol.* 2005 Oct;25(5):441-7.

**142. Fawcett 1989**

- Fawcett J, Zajecka JM, Kravitz HM, Edwards J, Jeffriess H, Scorza E. Fluoxetine versus amitriptyline in adult outpatients with major depression. *Current Therapeutic Research - Clinical and Experimental.* 1989 Jan 1;45(5):821-832.

**143. Feiger 1996**

- Feiger A, Kiev A, Shrivastava RK, Wisselink PG, Wilcox CS. Nefazodone versus sertraline in outpatients with major depression: focus on efficacy, tolerability, and effects on sexual function and satisfaction. *J Clin Psychiatry.* 1996;57 Suppl 2:53-62.

**144. Feighner 1979**

- Feighner JP, Brauzer B, Gelenberg AJ, Gomez E, Kiev A, Kurland ML, Weiss BL. A placebo-controlled multicenter trial of Limbitrol versus its components (amitriptyline and chlordiazepoxide) in the symptomatic treatment of depressive illness. *Psychopharmacology (Berl).* 1979 Mar 22;61(2):217-25.

**145. Feighner 1980**

- Feighner JP. Trazodone, a triazolopyridine derivative, in primary depressive disorder. *J Clin Psychiatry.* 1980;41(7):250-5.

**146. Feighner 1984**

- Feighner JP, Meredith CH, Stern WC, Hendrickson G, Miller LL. A double-blind study of bupropion and placebo in depression. *Am J Psychiatry.* 1984;141(4):525-9.

**147. Feighner 1989a**

- Feighner JP, Boyer WF, Merideth CH, Hendrickson GG. A double-blind comparison of fluoxetine, imipramine and placebo in outpatients with major depression. *Int Clin Psychopharmacol.* 1989 Apr;4(2):127-34.

**148. Feighner 1989b**

- Feighner JP, Boyer WF, Meredith CH, Hendrickson GG. A placebo-controlled inpatient comparison of fluvoxamine maleate and imipramine in major depression. *Int Clin Psychopharmacol*. 1989 Jul;4(3):239-44.

**149. Feighner 1991**

- Feighner JP, Gardner EA, Johnston JA, Batey SR, Khayrallah MA, Ascher JA, Lineberry CG. Double-blind comparison of bupropion and fluoxetine in depressed outpatients. *J Clin Psychiatry*. 1991 Aug;52(8):329-35.

**150. Feighner 1993a (Feighner 1989c, PAR 03 001 - FDA)**

- Feighner JP, Boyer WF. Paroxetine in the treatment of depression: a comparison with imipramine and placebo. *Acta Psychiatr Scand Suppl*. 1989;350:125-9.
- <http://digitalcommons.ohsu.edu/fdadrug/26/>

**151. Feighner 1993b (Cohn1990, Cohn1992, PAR 03 002 - FDA)**

- Cohn JB, Wilcox CS. Paroxetine in major depression: a double-blind trial with imipramine and placebo. *J Clin Psychiatry*. 1992 Feb;53 Suppl:52-6.
- <http://digitalcommons.ohsu.edu/fdadrug/26/>

**152. Feighner 1993c (PAR 03 003 - FDA)**

- Dunbar GC, Cohn JB, Fabre LF, Feighner JP, Fieve RR, Mendels J, Shrivastava RK. A comparison of paroxetine, imipramine and placebo in depressed out-patients. *Br J Psychiatry*. 1991 Sep;159:394-8
- <http://digitalcommons.ohsu.edu/fdadrug/26/>

**153. Feighner 1993d (Shrivastava 1992, PAR 03 004 - FDA)**

- Shrivastava RK, Shrivastava SH, Overweg N, Blumhardt CL. A double-blind comparison of paroxetine, imipramine and placebo in major depression. *J Clin Psychiatry* 1992;53 Suppl:48-51.
- <http://digitalcommons.ohsu.edu/fdadrug/26/>

**154. Feighner 1993e (PAR 03 005 - FDA)**

- Feighner JP. Cohn JB. Fabre LF Jr. Fieve RR. Mendels J. Shrivastava RK. Dunbar GC. A study comparing paroxetine placebo and imipramine in depressed patients. *Journal of Affective Disorders*. 28(2):71-79, 1993.
- <http://digitalcommons.ohsu.edu/fdadrug/26/>

**155. Feighner 1993f (Fabre 1992, PAR 03 006 - FDA)**

- Fabre LF. A 6-week, double-blind trial of paroxetine, imipramine, and placebo in depressed outpatients. *J Clin Psychiatry*. 1992;53 Suppl:40-3.
- <http://digitalcommons.ohsu.edu/fdadrug/26/>



**156. Feighner 1998**

- Feighner J, Targum SD, Bennett ME, Roberts DL, Kensler TT, D'Amico MF, Hardy SA. A double-blind, placebo-controlled trial of nefazodone in the treatment of patients hospitalized for major depression. *J Clin Psychiatry*. 1998 May;59(5):246-53.

**157. Feighner 1999 (Study 91206 FDA)**

- Feighner JP1, Overø K. Multicenter, placebo-controlled, fixed-dose study of citalopram in moderate-to-severe depression. *J Clin Psychiatry*. 1999 Dec;60(12):824-30.

**158. Fontaine 1994 (FDA 03A0A-003)**

- Fontaine R, Ontiveros A, Elie R, Kensler TT, Roberts DL, Kaplita S, Ecker JA, Faludi G. A double-blind comparison of nefazodone, imipramine, and placebo in major depression. *J Clin Psychiatry*. 1994;55(6):234-41.
- <http://digitalcommons.ohsu.edu/fdadrug/23/>

**159. Frank 2004**

- Frank MG, Hendricks SE, Burke WJ, Johnson DR. Clinical response augments NK cell activity independent of treatment modality: a randomized double-blind placebo controlled antidepressant trial. *Psychol Med*. 2004 Apr;34(3):491-8.

**160. Fudge 1990**

- Fudge JL, Perry PJ, Garvey MJ, Kelly MW. A comparison of the effect of fluoxetine and trazodone on the cognitive functioning of depressed outpatients. *J Affect Disord*. 1990 Apr;18(4):275-80.

**161. Gagiano 1993**

- Gagiano C. A double-blind comparison of paroxetine and fluoxetine in patients with major depression. *Br J Clin Res*. 1993;4:145-152.
- <https://www.gsk-clinicalstudyregister.com/files2/2783.pdf>

**162. Gastpar 2006**

- Gastpar M, Singer A, Zeller K. Comparative efficacy and safety of a once-daily dosage of hypericum extract STW3-VI and citalopram in patients with moderate depression: a double-blind, randomised, multicentre, placebo-controlled study. *Pharmacopsychiatry*. 2006 Mar;39(2):66-75.

**163. Gelenberg 1990**

- Gelenberg AJ, Wojcik JD, Falk WE, Spring B, Brotman AW, Galvin-Nadeau M. Clovoxamine in the treatment of depressed outpatients: a double-blind, parallel-group comparison against amitriptyline and placebo. *Compr Psychiatry*. 1990 Jul-Aug;31(4):307-14.

**164. Gentil 2000**

- Gentil V, Kerr-Correa F, Moreno R, D'Arrigo Busnello E, De Campos JA, Juruena MF, Lafer B, Moreno DH, De Cassia Rodrigues RL, Tiosso A, Benedictis E. Double-blind comparison of venlafaxine and amitriptyline in outpatients with major depression with or without melancholia. *J Psychopharmacol*. 2000 Mar;14(1):61-6.

**165. Georgotas 1982**

- Georgotas A, Krakowski M, Gershon S. Controlled trial of zimelidine, a 5-HT reuptake inhibitor, for treatment of depression. *Am J Psychiatry*. 1982 Aug;139(8):1057-8.

**166. Geretsegger 1995 (MY-060/BRL-029060/1)**

- Geretsegger C, Stuppaeck CH, Mair M, Platz T, Fartacek R, Heim M. Multicenter double blind study of paroxetine and amitriptyline in elderly depressed inpatients. *Psychopharmacology (Berl)*. 1995 Jun;119(3):277-81.
- <https://www.gsk-clinicalstudyregister.com/study/29060/073?search=study&#rs>

**167. Gerner 1980**

- Gerner R, Estabrook W, Steuer J, Jarvik L. Treatment of geriatric depression with trazodone, imipramine, and placebo: a double-blind study. *J Clin Psychiatry*. 1980 Jun;41(6):216-20.

**168. Gillin 1997**

- Gillin JC, Rapaport M, Erman MK, Winokur A, Albala BJ. A comparison of nefazodone and fluoxetine on mood and on objective, subjective, and clinician-rated measures of sleep in depressed patients: a double-blind, 8-week clinical trial. *J Clin Psychiatry*. 1997 May;58(5):185-92.

**169. Ginestet 1989**

- Ginestet D. Fluoxetine in endogenous depression and melancholia versus clomipramine. *Int Clin Psychopharmacol*. 1989 Jan;4 Suppl 1:37-40.

**170. Golden 2002a (29060/448)**

- Golden RN, Nemeroff CB, McSorley P, Pitts CD, Dubé EM. Efficacy and tolerability of controlled-release and immediate-release paroxetine in the treatment of depression. *J Clin Psychiatry*. 2002 Jul;63(7):577-84.
- <http://www.gsk-clinicalstudyregister.com/study/29060/448#rs>

**171. Golden 2002b (29060/449)**

- Golden RN, Nemeroff CB, McSorley P, Pitts CD, Dubé EM. Efficacy and tolerability of controlled-release and immediate-release paroxetine in the treatment of depression. *J Clin Psychiatry*. 2002 Jul;63(7):577-84.
- <http://www.gsk-clinicalstudyregister.com/study/29060/449#rs>

**172. Goldstein 2002 (HMAQ - Study Group A)**

- Goldstein DJ, Mallinckrodt C, Lu Y, Demitrack MA. Duloxetine in the treatment of major depressive disorder: a double-blind clinical trial. *J Clin Psychiatry*. 2002; 63: 225–31.
- <http://www.lillytrials.com/results/Cymbalta.pdf>

**173. Goldstein 2004a (HMAQ - Study Group A, ID#4091)**

- <http://www.lillytrials.com/results/Cymbalta.pdf>

**174. Goldstein 2004b (HMAT - Study Group B, ID#4091)**

- Goldstein DJ, Lu Y, Detke MJ, Wiltse C, Mallinckrodt C, Demitrack MA. Duloxetine in the treatment of depression: a double-blind placebo-controlled comparison with paroxetine. *J Clin Psychopharmacol.* 2004; 24: 389–99.

**175. Gommoll 2014 (LVM-MD-02, NCT00969150)**

- Gommoll CP, Greenberg WM, Chen C. A randomized, double-blind, placebo-controlled study of flexible doses of levomilnacipran ER (40–120 mg/day) in patients with major depressive disorder. *Journal of Drug Assessment.* 2014;3(1):10-19

**176. Goodarzi 2015 (IRCT2012101811155N1)**

- Goodarzi K, Astaneh N, Mazinani R, Alibeigi N, Mousavi Z. Comparison of therapeutic effects of mirtazaine and citalopram on outpatients with major depressive disorder and anxiety symptoms. *World Journal of Pharmaceutical Research.* 2015; 4(8):346-357.
- <http://www.irct.ir/searchresult.php?id=11155&number=1>

**177. Gorman 2002 (SCT-MD-02)**

- Gorman JM, Korotzer A, Su G. Efficacy comparison of escitalopram and citalopram in the treatment of major depressive disorder: pooled analysis of placebo-controlled trials. *CNS Spectr.* 2002 Apr;7(4 Suppl 1):40-4.
- [www.ncbi.nlm.nih.gov/pubmedhealth/PMH0016624/bin/app17c\\_et6.pdf](http://www.ncbi.nlm.nih.gov/pubmedhealth/PMH0016624/bin/app17c_et6.pdf)

**178. Griebel 2012 (Study DF15878, NCT00358631)**

- Griebel G, Beeské S, Stahl SM. The vasopressin V(1b) receptor antagonist SSR149415 in the treatment of major depressive and generalized anxiety disorders: results from 4 randomized, double-blind, placebo-controlled studies. *J Clin Psychiatry.* 2012 Nov;73(11):1403-11.
- <https://clinicaltrials.gov/ct2/show/NCT00358631>

**179. Griebel 2012b (Study DF15879, NCT00361491)**

- Griebel G, Beeské S, Stahl SM. The vasopressin V(1b) receptor antagonist SSR149415 in the treatment of major depressive and generalized anxiety disorders: results from 4 randomized, double-blind, placebo-controlled studies. *J Clin Psychiatry.* 2012 Nov;73(11):1403-11.
- <https://clinicaltrials.gov/ct2/show/NCT00361491>

**180. Grunebaum 2012 (NCT00429169)**

- Grunebaum MF, Ellis SP, Duan N, Burke AK, Oquendo MA, Mann JJ. Pilot Randomized Clinical Trial of an SSRI vs Bupropion: Effects on Suicidal Behavior, Ideation, and Mood in Major Depression. *Neuropsychopharmacology.* 2012 Feb; 37(3): 697–706.
- <https://clinicaltrials.gov/ct2/show/NCT00429169>

**181. GSK14**

- <http://www.gsk-clinicalstudyregister.com/study/14#rs>

**182. Guelfi 1995 (VEN 600A-206 FDA)**

- Guelfi JD, White C, Hackett D, Guichoux JY, Magni G. Effectiveness of venlafaxine in patients hospitalized for major depression and melancholia. *J Clin Psychiatry*. 1995 Oct;56(10):450-8.
- <http://digitalcommons.ohsu.edu/fdadrug/24/>

**183. Guelfi 1998**

- Guelfi JD, Anseau M, Corruble E, Samuelian JC, Tonelli I, Tournoux A, Plétan Y. A double-blind comparison of the efficacy and safety of milnacipran and fluoxetine in depressed inpatients. *Int Clin Psychopharmacol*. 1998 May;13(3):121-8.

**184. Guillibert 1989 (PAR 290 MDF 29060 1727 M)**

- Guillibert E, Pelicier Y, Archambault JC, Chabannes JP, Clerc G, Desvilles M, Guibert M, Pagot R, Poisat JL, Thobie Y. A double-blind, multicentre study of paroxetine versus clomipramine in depressed elderly patients. *Acta Psychiatr Scand Suppl*. 1989;350:132-4.
- <https://www.gsk-clinicalstudyregister.com/study/29060/290?search=study&#rs>

**185. Hackett 1998**

- Hackett D, Salinas E, Desmet A. Efficacy and safety of venlafaxine vs. fluvoxamine in outpatients with major depression. *Eur Neuropsychopharmacol*. 1998;8(Supp2):S209

**186. Hale 2010 (CL3-20098-045)**

- Hale A, Corral RM, Mencacci C, Ruiz JS, Severo CA, Gentil V. Superior antidepressant efficacy results of agomelatine versus fluoxetine in severe MDD patients: a randomized, double-blind study. *Int Clin Psychopharmacol*. 2010 Nov;25(6):305-14.
- <https://www.tga.gov.au/sites/default/files/auspar-valdoxan.pdf>

**187. Halikas 1995 (MIR 003-023 - FDA)**

- Halikas JA. Org 3770 (Mirtazapine) versus Trazodone: A Placebo Controlled Trial in Depressed Elderly Patients. *Human Psychopharmacology* 1995;10:S125-S133.
- <http://digitalcommons.ohsu.edu/fdadrug/20/>

**188. Hao 2014**

- Hao X, Yang F, Kuang H, Shi J, Du B, Zhang K, Zhang H. Duloxetine hydrochloride enteric tablets in the treatment of major depressive disorder: a multicentre, randomised, double-blind and positive drug parallel controlled clinical trial. *Chinese Journal of new Drugs*. 2014;23:2767-2780.

**189. Harris 1991**

- Harris B, Szulecka TK, Anstee JA. Fluvoxamine versus amitriptyline in depressed hospital outpatients: A multicentre double-blind comparative trial. *Br J Clin Res*. 1991;2:89-99.

**190. Heiligenstein 1994**

- Heiligenstein J, Faries D, Rush A, Andersen J, Pande A, Roffwarg H, Dunner D, Gillin J, James S, Lahmeyer H. Latency to rapid eye movement sleep as a predictor of treatment response to fluoxetine and placebo in nonpsychotic depressed outpatients. *Psychiatry Res*. 1994;52:327-39.

**191. Heller 2009 (NCT00909155)**

- Heller AS, Johnstone T, Shackman AJ, Light SN, Peterson MJ, Kolden GG, Kalin NH, Davidson RJ. Reduced capacity to sustain positive emotion in major depression reflects diminished maintenance of fronto-striatal brain activation. *Proc Natl Acad Sci U S A*. 2009 Dec 29;106(52):22445-50.
- <https://clinicaltrials.gov/ct2/show/NCT00909155>

**192. Henigsberg 2012 (305, NCT00735709)**

- Henigsberg N, Mahableshwarkar AR, Jacobsen P, Chen Y, Thase ME. A randomized, double-blind, placebo-controlled 8-week trial of the efficacy and tolerability of multiple doses of Lu AA21004 in adults with major depressive disorder. *J Clin Psychiatry* 2012;73(7):953-9.
- <https://clinicaltrials.gov/ct2/show/NCT00735709>

**193. Heun 2013 (ISRCTN57507360)**

- Heun R, Ahokas A, Boyer P, Giménez-Montesinos N, Pontes-Soares F, Olivier V; Agomelatine Study Group. The efficacy of agomelatine in elderly patients with recurrent major depressive disorder: a placebo-controlled study. *J Clin Psychiatry*. 2013 Jun;74(6):587-94.

**194. Hewett 2009 (WXL101497)**

- Hewett K, Chrzanowski W, Schmitz M, Savela A, Milanova V, Gee M, Krishen A, Millen L, Leary MO, Modell J. Eight-week, placebo-controlled, double-blind comparison of the antidepressant efficacy and tolerability of bupropion XR and venlafaxine XR. *J Psychopharmacol*. 2009;23(5):531-8.
- <http://www.gsk-clinicalstudyregister.com/study/101497#rs>

**195. Hewett 2010a (AK130940, NCT00093288)**

- Hewett K, Chrzanowski W, Schmitz M, Savela A, Milanova V, Gee M, Krishen A, Millen L, Leary MO, Modell J. Eight-week, placebo-controlled, double-blind comparison of the antidepressant efficacy and tolerability of bupropion XR and venlafaxine XR. *J Psychopharmacol*. 2009;23(5):531-8.
- <http://www.gsk-clinicalstudyregister.com/study/AK130940#ps>
- <https://clinicaltrials.gov/ct2/show/NCT00093288>

**196. Hewett 2010b (AK130939)**

- Hewett K, Gee MD, Krishen A, Wunderlich HP, Le Clus A, Evoniuk G, Modell JG. Double-blind, placebo-controlled comparison of the antidepressant efficacy and tolerability of bupropion XR and venlafaxine XR. *J Psychopharmacol*. 2010;24(8):1209-16.
- <http://www.gsk-clinicalstudyregister.com/study/AK130939#rs>

**197. Hicks 1988**

- Hicks F, Robins E, Murphy GE. Comparison of adinazolam, amitriptyline, and placebo in the treatment of melancholic depression. *Psychiatry Res*. 1988 Feb;23(2):221-7.

**198. Hicks 2002**

- Hicks JA, Argyropoulos SV, Rich AS, Nash JR, Bell CJ, Edwards C, Nutt DJ, Wilson SJ. Randomised controlled study of sleep after nefazodone or paroxetine treatment in out-patients with depression. *Br J Psychiatry*. 2002 Jun;180:528-35.

**199. Higuchi 2014 (NCT01441440)**

- Higuchi T, Kamijima K, Nakagome K, Itamura R, Asami Y, Kuribayashi K, Imaeda T. A randomized, double-blinded, placebo-controlled study to evaluate the efficacy and safety of venlafaxine extended release and a long-term extension study for patients with major depressive disorder in Japan. *Int Clin Psychopharmacol*. 2016 Jan;31(1):8-19.
- <https://clinicaltrials.gov/ct2/show/NCT01441440>

**200. Higuchi 2009**

- Higuchi T, Murasaki M, Kamijima K. Clinical evaluation of duloxetine in the treatment of major depressive disorder. *Jpn J Clin Psychopharmacol* 2009;12:1613-1634.

**201. Higuchi 2011 (PCR112810, NCT00866294)**

- Higuchi T, Hong JP, Jung HY, Watanabe Y, Kunitomi T, Kamijima K. Paroxetine controlled-release formulation in the treatment of major depressive disorder: a randomized, double-blind, placebo-controlled study in Japan and Korea. *Psychiatry Clin Neurosci* 2011;65:655-63.
- <http://www.gsk-clinicalstudyregister.com/study/112810#ps>
- <https://clinicaltrials.gov/ct2/show/NCT00866294>

**202. Hirayasu 2011a**

- Hirayasu Y. A dose-response study of escitalopram in patients with major depressive disorder: a placebo-controlled, double-blind study. *Jpn J Clin Psychopharmacol* 2011;14:871-882.

**203. Hirayasu 2011b**

- Hirayasu Y. A dose-response and non-inferiority study evaluating the efficacy and safety of escitalopram in patients with major depressive disorder. *Jpn J Clin Psychopharmacol* 2011;14:883-899.

**204. Hong 2003 (22521)**

- Hong CJ, Hu WH, Chen CC, Hsiao CC, Tsai SJ, Ruwe FJ. A double-blind, randomized, group-comparative study of the tolerability and efficacy of 6 weeks' treatment with mirtazapine or fluoxetine in depressed Chinese patients. *J Clin Psychiatry*. 2003 Aug;64(8):921-6.

**205. Hormazabal 1985**

- Hormazabal L, Omer LM, Ismail S. Cianopramine and amitriptyline in the treatment of depressed patients--a placebo-controlled study. *Psychopharmacology (Berl)* 1985;86(1-2):205-8.

**206. Hosseini 2015 (IRCT201203048513N1)**

- Hosseini F, Amini F, Yassini Ardekani SM, Shariat N, Nadi M. Double-Blind Randomized Clinical Trial of the Efficacy of Venlafaxine Versus Citalopram in the Treatment of the Acute Phase of Major Depressive Disorder. *Iran J Psychiatry Behav Sci.* 2015 Jun;9(2):e1041.
- <http://www.irct.ir/searchresult.php?keyword=&id=8513&field=&number=1&prt=43&total=10&m=1>

**207. Hoyberg 1996 (Organon 88013, FDA88013)**

- Hoyberg OJ, Maragakis B, Mullin J, Norum D, Stordall E, Ekdahl P, Ose E, Moksnes KM, Sennef C. A double-blind multicentre comparison of mirtazapine and amitriptyline in elderly depressed patients. *Acta Psychiatr Scand.* 1996; 93(3): 184-190.

**208. Hsu 2011**

- Hsu JW, Su TP, Huang CY, Chen YS, Chou YH. Faster onset of antidepressant effects of citalopram compared with sertraline in drug-naïve first-episode major depressive disorder in a Chinese population: a 6-week double-blind, randomized comparative study. *J Clin Psychopharmacol.* 2011 Oct;31(5):577-81.

**209. Hu 2009**

- Hu M, Li L, Lu X, Xun G, Chen J. Escitalopram vs citalopram for depression: a randomized, double-blind, double-dummy, multicentre, parallel controlled study. *Central South Pharmacy.* 2009; 8(1):1-4.

**210. Hunter 2010 (Study 1)**

- Hunter AM, Muthén BO, Cook IA, Leuchter AF. Antidepressant response trajectories and quantitative electroencephalography (QEEG) biomarkers in major depressive disorder. *J Psychiatr Res.* 2010 Jan;44(2):90-8.

**211. Hunter 2010 (Study 2)**

- Hunter AM, Muthén BO, Cook IA, Leuchter AF. Antidepressant response trajectories and quantitative electroencephalography (QEEG) biomarkers in major depressive disorder. *J Psychiatr Res.* 2010 Jan;44(2):90-8.

**212. Hunter 2010 (Study 3)**

- Hunter AM, Muthén BO, Cook IA, Leuchter AF. Antidepressant response trajectories and quantitative electroencephalography (QEEG) biomarkers in major depressive disorder. *J Psychiatr Res.* 2010 Jan;44(2):90-8.

**213. Hutchinson 1992**

- Hutchinson DR, Tong S, Moon CA, Vince M, Clarke A. Paroxetine in the treatment of elderly depressed patients in general practice: a double-blind comparison with amitriptyline. *Int Clin Psychopharmacol.* 1992 Jun;6(Suppl 4):43-51.

**214. Itil 1983**

- Itil TM, Shrivastava RK, Mukherjee S, Coleman BS, Michael ST. A double-blind placebo-controlled study of fluvoxamine and imipramine in out-patients with primary depression. *Br J Clin Pharmacol.* 1983;15(Suppl 3):433S-438S.

**215. Iwata 2013 (NCT00798707)**

- Iwata N1, Tourian KA, Hwang E, Mele L, Violet C. Efficacy and safety of desvenlafaxine 25 and 50mg/day in a randomized, placebo-controlled study of depressed outpatients. *J Psychiatr Pract.* 2013 Jan;19(1):5-14.
- <https://clinicaltrials.gov/ct2/show/NCT00798707>

**216. Jacobsen 2015 (316, NCT01163266)**

- Jacobsen PL, Mahableshwarkar AR, Serenko M, Chan S, Trivedi MH. A randomized, double-blind, placebo-controlled study of the efficacy and safety of vortioxetine 10 mg and 20 mg in adults with major depressive disorder. *J Clin Psychiatry* 2015;76(5):575-82.
- <https://clinicaltrials.gov/ct2/show/NCT01163266>

**217. Jain 2013 (303, NCT00672958)**

- Jain R, Mahableshwarkar AR, Jacobsen PL, Chen Y, Thase ME. A randomized, double-blind, placebo-controlled 6-wk trial of the efficacy and tolerability of 5 mg vortioxetine in adults with major depressive disorder. *Int J Neuropsychopharmacol.* 2013;16(2):313-21.
- <https://clinicaltrials.gov/ct2/show/NCT00672958>

**218. Jefferson 2000 (29060/785)**

- Jefferson J, Griest J. A double-blind, placebo controlled, fixed-dosage study comparing the efficacy and tolerability of paroxetine CR and citalopram to placebo in the treatment of Major Depressive Disorder with anxiety. American College of Neuropsychopharmacology, 39th Annual Meeting 12/11/2000 San Juan, Puerto Rico.
- <http://www.gsk-clinicalstudyregister.com/study/29060/785#csr>

**219. Jefferson 2006**

- Jefferson JW, Rush AJ, Nelson JC, VanMeter SA, Krishen A, Hampton KD, Wightman DS, Modell JG. Extended-release bupropion for patients with major depressive disorder presenting with symptoms of reduced energy, pleasure, and interest: findings from a randomized, double-blind, placebo-controlled study. *J Clin Psychiatry.* 2006 Jun;67(6):865-73.

**220. Jiang 2009**

- Jiang X, Ren K. A comparative study on escitalopram and citalopram hydrobromide in the treatment of depression. *Journal of Qiqihar Medical College,* 2009; 30(1):1-2.



**221. Judd 1993**

- Judd FK, Moore K, Norman TR, Burrows GD, Gupta RK, Parker G. A multicentre double blind trial of fluoxetine versus amitriptyline in the treatment of depressive illness. *Aust N Z J Psychiatry*. 1993 Mar;27(1):49-55.

**222. Kamijima 2013 (japicCTI-090733)**

- Kamijima K, Hashimoto S, Nagayoshi E, Koyama T. Double-blind, comparative study of milnacipran and paroxetine in Japanese patients with major depression. *Neuropsychiatr Dis Treat*. 2013;9:555-65.

**223. Kane 1983**

- Kane JM, Cole K, Sarantakos S, Howard A, Borenstein M. Safety and efficacy of bupropion in elderly patients: preliminary observations. *J Clin Psychiatry*. 1983 May;44(5 Pt 2):134-6.

**224. Kasper 2005a (Study 99024)**

- Kasper S, de Swart H, Friis Andersen H. Escitalopram in the treatment of depressed elderly patients. *Am J Geriatr Psychiatry*. 2005 Oct;13(10):884-91.

**225. Kasper 2005b**

- Kasper S, Olivieri L, Di Loreto G, Dionisio P. A comparative, randomised, double-blind study of trazodone prolonged-release and paroxetine in the treatment of patients with major depressive disorder. *Curr Med Res Opin*. 2005 Aug;21(8):1139-46.

**226. Kasper 2012 (NCT00807248)**

- Kasper S, Ebert B, Larsen K, Tonnoir B. Combining escitalopram with gaboxadol provides no additional benefit in the treatment of patients with severe major depressive disorder. *Int J Neuropsychopharmacol*. 2012 Jul;15(6):715-25.
- <https://clinicaltrials.gov/ct2/show/NCT00807248>

**227. Katona 2012 (12541A, NCT00811252)**

- Katona C, Hansen T, Olsen CK. A randomized, double-blind, placebo-controlled, duloxetine-referenced, fixed-dose study comparing the efficacy and safety of Lu AA21004 in elderly patients with major depressive disorder. *Int Clin Psychopharmacol* 2012;27(4):215-23.
- <https://clinicaltrials.gov/ct2/show/NCT00811252>

**228. Katz 1993a**

- Katz RJ, Lott M, Landau P, Waldmeier P. A clinical test of noradrenergic involvement in the therapeutic mode of action of an experimental antidepressant. *Biol Psychiatry*. 1993 Feb 15;33(4):261-6.

**229. Katz 1993b**

- Katz RJ, Lott M, Landau P, Waldmeier P. A clinical test of noradrenergic involvement in the therapeutic mode of action of an experimental antidepressant. *Biol Psychiatry*. 1993 Feb 15;33(4):261-6.

**230. Katz 2004**

- Katz MM, Tekell JL, Bowden CL, Brannan S, Houston JP, Berman N, Frazer A. Onset and early behavioral effects of pharmacologically different antidepressants and placebo in depression. *Neuropsychopharmacology*. 2004;29(3):566-79.

**231. Kavoussi 1997**

- Kavoussi RJ, Segraves RT, Hughes AR, Ascher JA, Johnston JA. Double-blind comparison of bupropion sustained release and sertraline in depressed outpatients. *J Clin Psychiatry*. 1997 Dec;58(12):532-7.

**232. Keegan 1991**

- Keegan D, Bowen RC, Blackshaw S, Saleh S, Dayal N, Remillard F, Shrikhande S, Cebrian Perez S, Boulton A. A comparison of fluoxetine and amitriptyline in the treatment of major depression. *Int Clin Psychopharmacol*. 1991 Summer;6(2):117-24.

**233. Kellams 1979**

- Kellams JJ, Klapper M, Small J. Trazodone, a new antidepressant: efficacy and safety in endogenous depression. *J Clin Psychiatry*. 1979;40(9):390-5.

**234. Keller 2006a (Study059, NCT00035009)**

- Keller M, Montgomery S, Ball W, Morrison M, Snively D, Liu G, Hargreaves R, Hietala J, Lines C, Beebe K, Reines S. Lack of efficacy of the substance p (neurokinin1 receptor) antagonist aprepitant in the treatment of major depressive disorder. *Biol Psychiatry*. 2006 Feb 1;59(3):216-23.
- <https://clinicaltrials.gov/ct2/show/NCT00035009>

**235. Keller 2006b (Study061, NCT00035295)**

- Keller M, Montgomery S, Ball W, Morrison M, Snively D, Liu G, Hargreaves R, Hietala J, Lines C, Beebe K, Reines S. Lack of efficacy of the substance p (neurokinin1 receptor) antagonist aprepitant in the treatment of major depressive disorder. *Biol Psychiatry*. 2006 Feb 1;59(3):216-23.
- <https://clinicaltrials.gov/ct2/show/NCT00035295?term=NCT00035295&rank=1>

**236. Keller 2006c (Study062, NCT00048607)**

- Keller M, Montgomery S, Ball W, Morrison M, Snively D, Liu G, Hargreaves R, Hietala J, Lines C, Beebe K, Reines S. Lack of efficacy of the substance p (neurokinin1 receptor) antagonist aprepitant in the treatment of major depressive disorder. *Biol Psychiatry*. 2006 Feb 1;59(3):216-23.
- <https://clinicaltrials.gov/ct2/show/NCT00048607?term=NCT00048607&rank=1>

**237. Keller 2007 (NCT00046020)**

- Keller MB, Trivedi MH, Thase ME, Shelton RC, Kornstein SG, Nemeroff CB, Friedman ES, Gelenberg AJ, Kocsis JH, Dunner DL, Hirschfeld RM, Rothschild AJ, Ferguson JM, Schatzberg AF, Zajecka JM, Pedersen RD, Yan B, Ahmed S, Musgnung J, Ninan PT. The Prevention of Recurrent Episodes of Depression with Venlafaxine for Two Years (PREVENT) Study: Outcomes from the 2-year and combined maintenance phases. *J Clin Psychiatry*. 2007 Aug;68(8):1246-56.
- <https://clinicaltrials.gov/ct2/show/NCT00046020>

**238. Kennedy 2005 (SCT-MD-16)**

- Kennedy SH, Anderson HF, Lam RW. A pooled analysis of selective serotonin reuptake inhibitors and venlafaxine. Poster presented at the American Psychiatric Association, May 2005.

**239. Kennedy 2006 (CL3-20098-043)**

- Kennedy, SH, Emsley, R Placebo-controlled trial of agomelatine in the treatment of major depressive disorder. *Eur Neuropsychopharm* 2006; 16: 93-100.
- [http://www.ema.europa.eu/docs/en\\_GB/document\\_library/EPAR\\_-\\_Public\\_assessment\\_report/human/000916/WC500038315.pdf](http://www.ema.europa.eu/docs/en_GB/document_library/EPAR_-_Public_assessment_report/human/000916/WC500038315.pdf)

**240. Kennedy 2014 (EudraCT 2009-011238-84, CL3-20098-069)**

- Kennedy SH, Avedisova A, Giménez-Montesinos N, Belaïdi C, de Bodinat C; Agomelatine Study Group. A placebo-controlled study of three agomelatine dose regimens (10 mg, 25 mg, 25-50 mg) in patients with major depressive disorder. *Eur Neuropsychopharmacol*. 2014 Apr;24(4):553-63.
- <https://www.clinicaltrialsregister.eu/ctr-search/search?query=2009-011238-84>
- [http://www.ema.europa.eu/docs/en\\_GB/document\\_library/EPAR\\_-\\_Public\\_assessment\\_report/human/000916/WC500038315.pdf](http://www.ema.europa.eu/docs/en_GB/document_library/EPAR_-_Public_assessment_report/human/000916/WC500038315.pdf)

**241. Kerkhofs 1990**

- Kerkhofs M, Rielaert C, de Maertelaer V, Linkowski P, Czarka M, Mendlewicz J. Fluoxetine in major depression: efficacy, safety and effects on sleep polygraphic variables. *Int Clin Psychopharmacol*. 1990 Oct;5(4):253-60.

**242. Kerr 1984**

- Kerr TA, McClelland HA, Stephens DA, Ankier SI. Trazodone. A comparative clinical and predictive study. *Acta Psychiatr Scand*. 1984 Dec;70(6):573-7.

**243. Khan 1998**

- Khan A, Upton GV, Rudolph RL, Entsuah R, Leventer SM. The use of venlafaxine in the treatment of major depression and major depression associated with anxiety: a dose-response study. Venlafaxine Investigator Study Group. *J Clin Psychopharmacol*. 1998 Feb;18(1):19-25.

**244. Khan 2007 (SCT-MD-23, NCT00108979)**

- <https://clinicaltrials.gov/ct2/show/NCT00108979>

**245. Khan 2011 (CLDA-07-DP-02, NCT00683592)**

- Khan A, Cutler AJ, Kajdasz DK, Gallipoli S, Athanasiou M, Robinson DS, Whalen H, Reed CR. A randomized, double-blind, placebo-controlled, 8-week study of vilazodone, a serotonergic agent for the treatment of major depressive disorder. *J Clin Psychiatry*. 2011;72(4):441-7.
- <https://clinicaltrials.gov/ct2/show/NCT00683592>

**246. Kiev 1997**

- Kiev A, Feiger A. A double-blind comparison of fluvoxamine and paroxetine in the treatment of depressed outpatients. *J Clin Psychiatry*. 1997 Apr;58(4):146-52.

**247. Kinoshita 2009**

- Kinoshita T. A double-blind, placebo controlled study of a new antidepressant, mirtazapine, in depressed patients. *Jpn J Clin Psychopharmacol* 2009;12:289-306.

**248. Koshino 2013 (NCT01138007)**

- Koshino Y, Bahk W, Sakai H, Kobayashi T. Efficacy and safety of bupropion sustained-release formulation for the treatment of major depressive disorder: a multi-center, randomized, double-blind, placebo-controlled study in Asian patients. *Neuropsychiatr Dis Treat*. 2013;9:1273-80.
- <https://clinicaltrials.gov/ct2/show/NCT01138007>

**249. Kramer 1998**

- Kramer MS, Cutler N, Feighner J, Shrivastava R, Carman J, Sramek JJ, Reines SA, Liu G, Snavely D, Wyatt-Knowles E, Hale JJ, Mills SG, MacCoss M, Swain CJ, Harrison T, Hill RG, Hefti F, Scolnick EM, Cascieri MA, Chicchi GG, Sadowski S, Williams AR, Hewson L, Smith D, Carlson EJ, Hargreaves RJ, Rupniak NM. Distinct mechanism for antidepressant activity by blockade of central substance P receptors. *Science*. 1998 Sep 11;281(5383):1640-5.

**250. Kuhs 1989 (MDUK\_29060\_III\_85\_043)**

- Kuhs H, Rudolf GA. A double-blind study of the comparative antidepressant effect of paroxetine and amitriptyline. *Acta Psychiatr Scand Suppl*. 1989;350:145-6.
- <https://www.gsk-clinicalstudyregister.com/study/29060/043?search=compound&compound=paroxetine#rs>

**251. Kusalic 1993**

- Kusalic M1, Engelsmann F, Bradwejn J. Thyroid functioning during treatment for depression. *J Psychiatry Neurosci*. 1993;18(5):260-3.

**252. Kyle 1998 (Study 92032 - FDA)**

- Kyle CJ, Petersen HE, Overø KF. Comparison of the tolerability and efficacy of citalopram and amitriptyline in elderly depressed patients treated in general practice. *Depress Anxiety*. 1998;8(4):147-53.

**253. Laakman 1988**

- Laakmann G, Blaschke D, Engel R, Schwarz A. Fluoxetine vs amitriptyline in the treatment of depressed out-patients. *Br J Psychiatry Suppl.* 1988 Sep;(3):64-8.

**254. Lalit 2004**

- Lalit V, Appaya PM, Hegde RP, Mital AK, Mittal S, Nagpal R, Palaniappun V, Ramsubramaniam C, Rao GP, Roy K, Trivedi JK, Vankar GK, Karan RS, Shah S, Patel RB. Escitalopram Versus Citalopram and Sertraline: A Double-Blind Controlled, Multi-centric Trial in Indian Patients with Unipolar Major Depression. *Indian J Psychiatry.* 2004 Oct-Dec; 46(4): 333–341.

**255. Lam 1995**

- Lam RW, Gorman CP, Michalon M, Steiner M, Levitt AJ, Corral MR, Watson GD, Morehouse RL, Tam W, Joffe RT. Multicenter, placebo-controlled study of fluoxetine in seasonal affective disorder. *Am J Psychiatry.* 1995;152(12):1765-70.

**256. Langlois 1985**

- Langlois R, Cournoyer G, de Montigny C, Caillé G. High incidence of multisystemic reactions to zimeldine. *Eur J Clin Pharmacol.* 1985;28(1):67-71.

**257. Lapierre 1980**

- Lapierre YD, Sussman P, Ghadirian A. Differential antidepressant properties of trazodone and amitriptyline in agitated and retarded depression. *Current Therapeutic Research.* 1980; 28:845-856.

**258. Lapierre 1987**

- Lapierre YD, Browne M, Horn E, Oyewumi LK, Sarantidis D, Roberts N, Badoe K, Tessier P. Treatment of major affective disorder with fluvoxamine. *J Clin Psychiatry.* 1987 Feb;48(2):65-8.

**259. Larsen 1989**

- Larsen JK, Holm P, Høyer E, Mejlhede A, Mikkelsen PL, Olesen A, Schaumburg E. Moclobemide and clomipramine in reactive depression. A placebo-controlled randomized clinical trial. *Acta Psychiatr Scand.* 1989 Jun;79(6):530-6.

**260. Learned 2012a Study1 (EUCTR2005-003401-87, SND103285, NCT00448058)**

- Learned S, Graff O, Roychowdhury S, Moate R, Krishnan KR, Archer G, Modell JG, Alexander R, Zamuner S, Lavergne A, Evoniuk G, Ratti E. Efficacy, safety, and tolerability of a triple reuptake inhibitor GSK372475 in the treatment of patients with major depressive disorder: two randomized, placebo- and active-controlled clinical trials. *J Psychopharmacol.* 2012;26:653-62.
- <https://www.clinicaltrialsregister.eu/ctr-search/search?query=2005-003401-87>
- <https://clinicaltrials.gov/ct2/show/NCT00448058>

**261. Learned 2012b Study2 (NCT00420641)**

- Learned S, Graff O, Roychowdhury S, Moate R, Krishnan KR, Archer G, Modell JG, Alexander R, Zamuner S, Lavergne A, Evoniuk G, Ratti E. Efficacy, safety, and tolerability of a triple reuptake inhibitor GSK372475 in the treatment of patients with major depressive disorder: two randomized, placebo- and active-controlled clinical trials. *J Psychopharmacol*. 2012 May;26(5):653-62.
- <https://clinicaltrials.gov/ct2/show/NCT00420641>

**262. Lecrubier 1997**

- Lecrubier Y, Bourin M, Moon CA, Schifano F, Blanchard C, Danjou P, Hackett D. Efficacy of venlafaxine in depressive illness in general practice. *Acta Psychiatr Scand*. 1997;95(6):485-93.

**263. Lee 2007 (F1J-AA-HMCV, NCT00489775)**

- Lee P, Shu L, Xu X, Wang CY, Lee MS, Liu CY, Hong JP, Ruschel S, Raskin J, Colman SA, Harrison GA. Once-daily duloxetine 60 mg in the treatment of major depressive disorder: multicenter, double-blind, randomized, paroxetine-controlled, non-inferiority trial in China, Korea, Taiwan and Brazil. *Psychiatry Clin Neurosci*. 2007 Jun;61(3):295-307.
- <https://clinicaltrials.gov/ct2/show/NCT00489775>

**264. Leinonen 1997**

- Leinonen E, Lepola U, Koponen H, Mehtonen OP, Rimon R. Long-term efficacy and safety of milnacipran compared to clomipramine in patients with major depression. *Acta Psychiatr Scand*. 1997 Dec;96(6):497-504.

**265. Leinonen 1999 (Agren1995)**

- Leinonen E, Skarstein J, Behnke K, Agren H, Helsdingen JT. Efficacy and tolerability of mirtazapine versus citalopram: a double-blind, randomized study in patients with major depressive disorder. Nordic Antidepressant Study Group. *Int Clin Psychopharmacol*. 1999 Nov;14(6):329-37.

**266. Lemoine 2007 (CL3-20098-035)**

- Lemoine P, Guilleminault C, Alvarez E. Improvement in subjective sleep in major depressive disorder with a novel antidepressant, agomelatine: randomized, double-blind comparison with venlafaxine. *J Clin Psychiatry*. 2007 Nov;68(11):1723-32.
- Servier. Study CL3-20098-035. Efficacy of agomelatine (25 mg with potential adjustment at 50 mg) given orally versus venlafaxine on subjective sleep evaluation of patients with Major Depressive Disorder. A randomised double-blind parallel groups study. 6-week treatment plus optional continuation for 18 weeks. Available from Servier. 2005.

**267. Lepine 2000**

- Lépine JP, Goger J, Blashko C, Probst C, Moles MF, Kosolowski J, Scharfetter B, Lane RM. A double-blind study of the efficacy and safety of sertraline and clomipramine in outpatients with severe major depression. *Int Clin Psychopharmacol*. 2000 Sep;15(5):263-71.

**268. Lepola 2003 (ESC 99003)**

- Lepola UM, Loft H, Reines EH .Escitalopram (10-20 mg/day) is effective and well tolerated in a placebo-controlled study in depression in primary care. *Int Clin Psychopharmacol.* 2003 Jul;18(4):211-7.

**269. Li 2006**

- Li J, Shen W, Liu Y, Xu L, Liu S, Kuang W. The Effectiveness and Safety of Escitalopram in the Treatment of Depression: A Randomized Double-blind Active-drug Controlled Trial. *Chin J Evid-based Med.* 2006; 6 (8):1-5.

**270. Li 2010**

- Li X, Tao F, Wang X, Li Ji. Clinical Research on Escitalopram Oxalate Tablets in Treatment of Depression. *Pharmaceutical and Clinical Research.* 2010; 18(1):1-3.

**271. Lieberman 2008a (Study 309, EUCTR2004-000562-13, 3151A1-309-EU, NCT00090649)**

- Lieberman DZ, Montgomery SA, Tourian KA, Brisard C, Rosas G, Padmanabhan K, Germain JM, Pitrosky B. A pooled analysis of two placebo-controlled trials of desvenlafaxine in major depressive disorder. *Int Clin Psychopharmacol.* 2008 Jul;23(4):188-97
- <https://www.clinicaltrialsregister.eu/ctr-search/search?query=2004-000562-13>
- <https://clinicaltrials.gov/ct2/show/NCT00090649>

**272. Lieberman 2008b (Study 317)**

- Lieberman DZ, Montgomery SA, Tourian KA, Brisard C, Rosas G, Padmanabhan K, Germain JM, Pitrosky B. A pooled analysis of two placebo-controlled trials of desvenlafaxine in major depressive disorder. *Int Clin Psychopharmacol.* 2008 Jul;23(4):188-97

**273. Liebowitz 2008 (Study 332, NCT00277823)**

- Liebowitz MR, Manley AL, Padmanabhan SK, Ganguly R, Tummala R, Tourian KA. Efficacy, safety, and tolerability of desvenlafaxine 50 mg/day and 100 mg/day in outpatients with major depressive disorder. *Curr Med Res Opin.* 2008;24(7):1877-90.
- <https://clinicaltrials.gov/ct2/show/NCT00277823>

**274. Liebowitz 2013 (NCT00863798)**

- Liebowitz MR1, Tourian KA, Hwang E, Mele L; Study 3362 Investigators. A double-blind, randomized, placebo-controlled study assessing the efficacy and tolerability of desvenlafaxine 10 and 50 mg/day in adult outpatients with major depressive disorder. *BMC Psychiatry.* 2013 Mar 22;13:94.
- <https://www.clinicaltrials.gov/ct2/show/NCT00863798>

**275. Lineberry 1990 (WELL 84A)**

- Lineberry CG, Johnston JA, Raymond RN, Samara B, Feighner JP, Harto NE, Granacher RP Jr, Weisler RH, Carman JS, Boyer WF. A fixed-dose (300 mg) efficacy study of bupropion and placebo in depressed outpatients. *J Clin Psychiatry.* 1990;51(5):194-9.
- <http://www.gsk-clinicalstudyregister.com/study/Well%2084A#rs>

**276. Loo 2002 (CL2-014)**

- Loo H, Hale A, D'haenen H. Determination of the dose of agomelatine, a melatonergic agonist and selective 5-HT(2C) antagonist, in the treatment of major depressive disorder: a placebo-controlled dose range study. *Int Clin Psychopharmacol.* 2002 Sep;17(5):239-47.

**277. Lopez-Rodriguez 2004**

- Rodriguez JL, Lopez Butron MA, Vargas Terrez BE, Villamil Salcedo V. Estudio doble ciego con antidepressivo, psicoterapia breve y placebo en pacientes con depression leve a moderada. *Salud Mental* 2004;27:53-61.

**278. Lv 2013**

- Lv Z, Zhang Y, Qi S. A randomized double-blind study of escitalopram and citalopram in treating major depression. *J Clin Psychiatry.* 2013;23(1):1-3.

**279. Lydiard 1989**

- Lydiard RB, Laird LK, Morton WA Jr, Steele TE, Kellner C, Laraia MT, Ballenger JC. Fluvoxamine, imipramine, and placebo in the treatment of depressed outpatients: effects on depression. *Psychopharmacol Bull.* 1989;25(1):68-70.

**280. Lydiard 1997**

- Lydiard RB1, Stahl SM, Hertzman M, Harrison WM. A double-blind, placebo-controlled study comparing the effects of sertraline versus amitriptyline in the treatment of major depression. *J Clin Psychiatry.* 1997 Nov;58(11):484-91.

**281. M/2020/0046 (Study 046)**

- <https://www.iqwig.de/de/projekte-ergebnisse/studieninformationen-zu-reboxetin.3304.html>

**282. M/2020/0047 (Study 047)**

- <https://www.iqwig.de/de/projekte-ergebnisse/studieninformationen-zu-reboxetin.3304.html>

**283. Mahableshwarkar 2013 (304, NCT00672620)**

- Mahableshwarkar AR, Jacobsen PL, Chen Y. A randomized, double-blind trial of 2.5 mg and 5 mg vortioxetine (Lu AA21004) versus placebo for 8 weeks in adults with major depressive disorder. *Curr Med Res Opin.* 2013;29(3):217-26.
- <https://clinicaltrials.gov/ct2/show/NCT00672620>

**284. Mahableshwarkar 2015a (315, NCT01153009)**

- Mahableshwarkar AR, Jacobsen PL, Chen Y, Serenko M, Trivedi MH. A randomized, double-blind, duloxetine-referenced study comparing efficacy and tolerability of 2 fixed doses of vortioxetine in the acute treatment of adults with MDD. *Psychopharmacology (Berl).* 2015;232(12):2061-70.
- <https://clinicaltrials.gov/ct2/show/NCT01153009>



**285. Mahableshwarkar 2015b (317, NCT01179516)**

- Mahableshwarkar AR, Jacobsen PL, Serenko M, Chen Y, Trivedi MH. A randomized, double-blind, placebo-controlled study of the efficacy and safety of 2 doses of vortioxetine in adults with major depressive disorder. *J Clin Psychiatry* 2015;76(5):583-91.
- <https://clinicaltrials.gov/ct2/show/NCT01179516>

**286. Mahableshwarkar 2015c (NCT01564862)**

- Mahableshwarkar AR, Zajecka J, Jacobson W, Chen Y, Keefe RS. A Randomized, Placebo-Controlled, Active-Reference, Double-Blind, Flexible-Dose Study of the Efficacy of Vortioxetine on Cognitive Function in Major Depressive Disorder. *Neuropsychopharmacology*. 2015;40(8):2025-37.
- <https://clinicaltrials.gov/ct2/show/NCT01564862>

**287. Mann 1981**

- Mann JJ, Georgotas A, Newton R, Gershon S. A controlled study of trazodone, imipramine, and placebo in outpatients with endogenous depression. *J Clin Psychopharmacol*. 1981;1(2):75-80.

**288. Manna 1989**

- Manna V, Martucci N, Agnoli A. Double-blind controlled study on the clinical efficacy and safety of fluoxetine vs clomipramine in the treatment of major depressive disorders. *Int Clin Psychopharmacol*. 1989 Jan;4 Suppl 1:81-8.

**289. Mao 2008**

- Mao P, Tang Y, Jiang F, Shu L, Gu X, Li M, Qian M, Ma C, Mitchell PB, Cai Z. Escitalopram in major depressive disorder: a multicenter, randomized, double-blind, fixed-dose, parallel trial in a Chinese population. *Depression and Anxiety*. 2008; 25(1): 46–54.

**290. Mao 2015 (NCT01098318)**

- Mao JJ, Xie SX, Zee J, Soeller I, Li QS, Rockwell K, Amsterdam JD. *Rhodiola rosea* versus sertraline for major depressive disorder: A randomized placebo-controlled trial. *Phytomedicine*. 2015 Mar 15;22(3):394-9.
- <https://clinicaltrials.gov/ct2/show/NCT01098318>

**291. March 1990**

- March JS, Kobak KA, Jefferson JW, Mazza J, Greist JH. A double-blind, placebo-controlled trial of fluvoxamine versus imipramine in outpatients with major depression. *J Clin Psychiatry*. 1990 May;51(5):200-2.

**292. Marchesi 1998**

- Marchesi C, Ceccherininelli A, Rossi A, Maggini C. Is Anxious-Agitated Major Depression Responsive to Fluoxetine? A Double-Blind Comparison with Amitriptyline. *Pharmacopsychiatry*. 1998;31(6):216-21.

**293. Masco 1985**

- Masco HL, Sheetz MS. Double-blind comparison of Fluoxetine and Amitriptyline in the treatment of Major Depressive Illness. *Advances in Therapy*. 1985; 2(6):275-283.

**294. Mathews 2015 (NCT01473381)**

- Mathews M, Gommoll C, Chen D, Nunez R, Khan A. Efficacy and safety of vilazodone 20 and 40 mg in major depressive disorder: a randomized, double-blind, placebo-controlled trial. *Int Clin Psychopharmacol*. 2015;30(2):67-74.
- <https://clinicaltrials.gov/ct2/show/NCT01473381>

**295. McGrath 2000**

- McGrath PJ, Stewart JW, Janal MN, Petkova E, Quitkin FM, Klein DF. A placebo-controlled study of fluoxetine versus imipramine in the acute treatment of atypical depression. *Am J Psychiatry*. 2000 Mar;157(3):344-50.

**296. McIntyre 2014 (NCT01422213)**

- McIntyre RS, Lophaven S, Olsen CK. A randomized, double-blind, placebo-controlled study of vortioxetine on cognitive function in depressed adults. *Int J Neuropsychopharmacol*. 2014;17(10):1557-67.
- <https://clinicaltrials.gov/ct2/show/NCT01422213>

**297. McPartlin 1998**

- McPartlin GM, Reynolds A, Anderson C, Casoy J. A comparison of once daily venlafaxine xr and paroxetine in depressed outpatients treated in general practice. *Primary Care Psychiatry*. 1998;4:127-32.

**298. MDF/29060/III/070/88/MC**

- <https://www.gsk-clinicalstudyregister.com/study/29060/070#rs>

**299. MDUK/26090/III/83/007**

- <https://www.gsk-clinicalstudyregister.com/study/26090/007#rs>

**300. Mehtonen 2000**

- Mehtonen OP, Sogaard J, Roponen P, Behnke K. Randomized, Double-Blind Comparison of Venlafaxine and Sertraline in Outpatients With Major Depressive Disorder. *The Journal of Clinical Psychiatry*. 2000;61(2):95-100.

**301. Mendels 1995 (FDA 03A0A-004B)**

- Mendels J, Reimherr F, Marcus RN, Roberts DL, Francis RJ, Anton SF. A double-blind, placebo-controlled trial of two dose ranges of nefazodone in the treatment of depressed outpatients. *J Clin Psychiatry*. 1995;56 Suppl 6:30-6.
- <http://digitalcommons.ohsu.edu/fdadrug/23/>

**302. Mendels 1999 (Study 85A - FDA)**

- Mendels J, Kiev A, Fabre LF. Double blind comparison of citalopram and placebo in depressed outpatients with melancholia. *Depress Anxiety*. 1999;9(2):54-60.
- [http://www.accessdata.fda.gov/drugsatfda\\_docs/nda/98/020822a.cfm](http://www.accessdata.fda.gov/drugsatfda_docs/nda/98/020822a.cfm)

**303. Miller 1989 (MDUK/29060/III/82/006, PAR-274, PAR UK 06 - FDA)**

- Miller SM, Naylor GJ, Murtagh M, Winslow G. A double-blind comparison of paroxetine and placebo in the treatment of depressed patients in a psychiatric outpatient clinic. *Acta Psychiatr Scand Suppl*. 1989;350:143-4
- <http://digitalcommons.ohsu.edu/fdadrug/26/>

**304. MIR 003-003 (FDA)**

- <http://digitalcommons.ohsu.edu/fdadrug/20/>

**305. MIR 003-020 (FDA)**

- <http://digitalcommons.ohsu.edu/fdadrug/20/>

**306. MIR 003-021 (FDA)**

- <http://digitalcommons.ohsu.edu/fdadrug/20/>

**307. MIR 84062 (FDA)**

- <http://digitalcommons.ohsu.edu/fdadrug/20/>

**308. Mischoulon 2014 (NCT00101452)**

- A Double-Blind, Randomized, Placebo-Controlled Clinical Trial of S-Adenosyl-L-Methionine (SAMe) Versus Escitalopram in Major Depressive Disorder. *The Journal of Clinical Psychiatry*. 2014;75(4):370-76.
- <https://clinicaltrials.gov/ct2/show/NCT00101452>

**309. Miura 2000**

- Miura S, Koyama T, Asai M, Endo S, Kamijima K, Ushijima S, Murasaki M, Kariya T, Koshino Y, Nakajima T, Nishimura K, Kudo Y, Saito M, Watanabe M, Tashiro N, Nakane Y. Clinical evaluation of paroxetine HCl, a selective serotonin reuptake inhibitor, in the treatment of depression or depressive episodes: Double-blind, parallel group study with amitriptyline HCl. *Yakuri To Chiro (Jpn Pharmacol Ther)*. 2000; 28 Supplement: 187-210. (in Japanese)

**310. Moises 1981**

- Moises HW, Kasper S, Beckmann H. Trazodone and amitriptyline in treatment of depressed inpatients. A double-blind study. *Pharmacopsychiatria*. 1981 Sep;14(5):167-71.

**311. Moller1993 (Stuppaeck1994, MY-059.073/29060/1)**

- Möller HJ, Berzewski H, Eckmann F, Gonzalves N, Kissling W, Knorr W, Ressler P, Rudolf GA, Steinmeyer EM, Magyar I. Double-blind multicenter study of paroxetine and amitriptyline in depressed inpatients. *Pharmacopsychiatry*. 1993 May;26(3):75-8.
- <https://www.gsk-clinicalstudyregister.com/study/29060/073?search=study&#rs>

**312. Moller 1998 (Hegerl 1997)**

- Möller HJ, Gallinat J, Hegerl U, Arató M, Janka Z, Pflug B, Bauer H. Double-Blind, Multicenter Comparative Study of Sertraline and Amitriptyline in Hospitalized Patients with Major Depression. *Pharmacopsychiatry*. 1998;31(5):170-7.

**313. Moller 2000**

- Möller HJ, Glaser K, Leverkus F, Göbel C. Double-blind, multicenter comparative study of sertraline versus amitriptyline in outpatients with major depression. *Pharmacopsychiatry*. 2000 Nov;33(6):206-12.

**314. Montgomery 1992 (Study 89303 FDA)**

- [http://www.accessdata.fda.gov/drugsatfda\\_docs/nda/98/020822a.cfm](http://www.accessdata.fda.gov/drugsatfda_docs/nda/98/020822a.cfm)

**315. Montgomery 2004a (Study 99067)**

- Montgomery SA, Huusom AKT, Bothmer J. A Randomised Study Comparing Escitalopram with Venlafaxine XR in Primary Care Patients with Major Depressive Disorder. *Neuropsychobiology*. 2004;50(1):57-64.

**316. Montgomery 2004b (CL3-20098-030)**

- Montgomery SA, Kennedy SH, Burrows GD, Lejoyeux M, Hindmarch I. Absence of discontinuation symptoms with agomelatine and occurrence of discontinuation symptoms with paroxetine: A randomized, double-blind, placebo-controlled discontinuation study. *International Clinical Psychopharmacology*. 2004;19(5):271-80.

**317. Montgomery 2013 (F02695LP202, EudraCT2006-002404-34)**

- Montgomery SA, Mansuy L, Ruth A, Bose A, Li H, Li D. Efficacy and safety of levomilnacipran sustained release in moderate to severe major depressive disorder: a randomized, double-blind, placebo-controlled, proof-of-concept study. *J Clin Psychiatry* 2013;74(4):363-9.
- <https://www.clinicaltrialsregister.eu/ctr-search/search?query=2006-002404-34>

**318. Moon 1994**

- Moon CAL, Jago W, Wood K, Doogan DP. A double-blind comparison of sertraline and clomipramine in the treatment of major depressive disorder and associated anxiety in general practice. *Journal of Psychopharmacology*. 1994;8(3):171-6.

**319. Moore 2005**

- Moore N, Verdoux H, Fantino B. Prospective, multicentre, randomized, double-blind study of the efficacy of escitalopram versus citalopram in outpatient treatment of major depressive disorder. *Int Clin Psychopharmacol*. 2005 May;20(3):131-7.

**320. Moreno 2005**

- Moreno RA, Teng CT, Almeida KM, Tavares Junior H. *Hypericum perforatum* versus fluoxetine in the treatment of mild to moderate depression: a randomized double-blind trial in a Brazilian sample. *Rev Bras Psiquiatr*. 2006 Mar;28(1):29-32.

**321. Moscovitch 2004**

- Moscovitch A, Blashko CA, Eagles JM, Darcourt G, Thompson C, Kasper S, Lane RM; International Collaborative Group on Sertraline in the Treatment of Outpatients with Seasonal Affective Disorders. A placebo-controlled study of sertraline in the treatment of outpatients with seasonal affective disorder. *Psychopharmacology (Berl)*. 2004 Feb;171(4):390-7.

**322. Mullin 1996**

- Mullin J, Lodge A, Bennie E, McCreadie R, Bhatt GS, Fenton G. A multicentre, double-blind, amitriptyline-controlled study of mirtazapine in patients with major depression. *Journal of Psychopharmacology*. 1996;10(3): 235-240

**323. Mundt 2012 (NCT00406952)**

- Mundt JC, Vogel AP, Feltner DE, Lenderking WR. Vocal acoustic biomarkers of depression severity and treatment response. *Biol Psychiatry*. 2012 Oct 1;72(7):580-7.
- <https://clinicaltrials.gov/ct2/show/NCT00406952>

**324. Munizza 2006**

- Munizza C, Olivieri L, Di Loreto G, Dionisio P. A comparative, randomized, double-blind study of trazodone prolonged-release and sertraline in the treatment of major depressive disorder. *Curr Med Res Opin*. 2006 Sep;22(9):1703-13.

**325. Murasaki 1998**

- Murasaki M, Mori A, Miura S et al. Clinical evaluation of SME3110 (fluvoxamine maleate) in the treatment of depression and depressive state: A double-blind, comparative study with amitriptyline. *Rinsho-Iyaku (Journal of Clinical Therapeutics & Medicines)* 1998; 14(5): 951-980. (in Japanese)

**326. Murasaki 2010a (iQWIG22532, Schoemaker 2002)**

- Murasaki M, Schoemaker JH, Miyake K, Gailledreau J, Heukels AJ, Fennema HP, Sitsen JMA. Comparison of efficacy and safety of mirtazapine versus fluvoxamine in Japanese and Caucasian patients with major depressive disorder. *Rinsho-Seishin-Yakuri (Japanese Journal of Clinical Psychopharmacology)* 2010 13(2): 339-355. (in Japanese)

**327. Murasaki 2010b (iQWIG9902, Schoemaker 2002)**

- Murasaki M, Schoemaker JH, Miyake K, Gailledreau J, Heukels AJ, Fennema HP, Sitsen JMA. Comparison of efficacy and safety of mirtazapine versus fluvoxamine in Japanese and Caucasian patients with major depressive disorder. *Rinsho-Seishin-Yakuri (Japanese Journal of Clinical Psychopharmacology)* 2010 13(2): 339-355. (in Japanese)

**328. MY-1008/BRL-029060/2/CPMS-076**

- <https://www.gsk-clinicalstudyregister.com/study/29060/076#rs>

**329. MY-1042/BRL-029060/CPMS-251**

- <http://www.gsk-clinicalstudyregister.com/study/29060/251?search=compound&compound=paroxetine#rs>

**330. MY-1043/BRL-029060/115**

- <http://www.gsk-clinicalstudyregister.com/study/29060/115#rs>

**331. MY-1045/BRL-029060/1 (PAR 128)**

- <http://www.gsk-clinicalstudyregister.com/study/29060/128#rs>

**332. Mynors-Wallis 1995**

- Mynors-Wallis LM, Gath DH, Lloyd-Thomas AR, Tomlinson D. Randomised controlled trial comparing problem solving treatment with amitriptyline and placebo for major depression in primary care. *BMJ* 1995 Feb 18;310(6977):441-5.

**333. NCT00822744 (EudraCT Number2008-001718-26)**

- <https://clinicaltrials.gov/ct2/show/NCT00822744>
- <https://www.clinicaltrialsregister.eu/ctr-search/trial/2008-001718-26/SK>

**334. NCT01020799**

- <https://clinicaltrials.gov/ct2/show/NCT01020799>

**335. NCT01145755**

- <https://clinicaltrials.gov/ct2/show/NCT01145755>

**336. NCT01254305**

- <https://clinicaltrials.gov/ct2/show/NCT01254305>

**337. NCT01255787 (EUCTR2010-022257-41, JapicCTI-101344, CTRI/2011/08/001963)**

- <https://clinicaltrials.gov/ct2/show/NCT01255787>
- <https://www.clinicaltrialsregister.eu/ctr-search/search?query=2010-022257-41>

**338. NCT01355081 (japicCTI-111492, U1111-1120-9277)**

- <https://clinicaltrials.gov/ct2/show/NCT01355081>

**339. NCT01808612**

- <https://clinicaltrials.gov/ct2/show/NCT01808612>

**340. Nemeroff 1995**

- Nemeroff CB, Ninan P, Ballenger J, Lydiard RB, Feighner J, Patterson WM, Greist JH. Double-blind multicenter comparison of fluvoxamine versus sertraline in the treatment of depressed outpatients. *Depression*. 1995;3(4):163-69.

**341. Nemeroff 2007**

- Nemeroff CB, Thase ME; EPIC 014 Study Group. A double-blind, placebo-controlled comparison of venlafaxine and fluoxetine treatment in depressed outpatients. *J Psychiatry Res* 2007;41: 351–59.

**342. Newhouse 2000**

- Newhouse PA, Krishnan KR, Doraiswamy PM, Richter EM, Batzar ED, Clary CM. A double-blind comparison of sertraline and fluoxetine in depressed elderly patients. *J Clin Psychiatry*. 2000;61(8):559-68.

**343. Nierenberg 2007 (F1J-MC-HMCR, NCT00073411, Pigott 2007)**

- Nierenberg AA, Greist JH, Mallinckrodt CH, et al. Duloxetine versus escitalopram and placebo in the treatment of patients with major depressive disorder: onset of antidepressant action, a non-inferiority study. *Curr Med Res Opin* 2007; 23: 401–16.
- <http://www.lillytrials.com/results/Cymbalta.pdf>
- <https://clinicaltrials.gov/ct2/show/NCT00073411>

**344. Ninan 2003 (poster SCT-MD-26)**

- [www.ncbi.nlm.nih.gov/pubmedhealth/PMH0016624/bin/app17c\\_et6.pdf](http://www.ncbi.nlm.nih.gov/pubmedhealth/PMH0016624/bin/app17c_et6.pdf)

**345. NKD20006 (NCT00048204)**

- <http://www.gsk-clinicalstudyregister.com/study/NKD20006#ps>
- <https://clinicaltrials.gov/ct2/show/NCT00048204>

**346. Noguera 1991**

- Noguera R, Altuna R. Fluoxetine vs. clomipramine in depressed patients: a controlled multicentre trial. *J Affect Disord*. 1991;22(3):119-24.

**347. Norton 1984**

- Norton KR, Sireling LI, Bhat AV, Rao B, Paykel ES. A double-blind comparison of fluvoxamine, imipramine and placebo in depressed patients. *J Affect Disord*. 1984;7:297-308.

**348. Oakes 2012a (NCT00536471)**

- Oakes TM, Myers AL, Marangell LB, Ahl J, Prakash A, Thase ME, Kornstein SG. Assessment of depressive symptoms and functional outcomes in patients with major depressive disorder treated with duloxetine versus placebo: primary outcomes from two trials conducted under the same protocol. *Hum Psychopharmacol*. 2012 Jan;27(1):47-56.
- <https://www.clinicaltrials.gov/ct2/show/NCT00536471>

**349. Oakes 2012b (NCT00536471)**

- Oakes TM, Myers AL, Marangell LB, Ahl J, Prakash A, Thase ME, Kornstein SG. Assessment of depressive symptoms and functional outcomes in patients with major depressive disorder treated with duloxetine versus placebo: primary outcomes from two trials conducted under the same protocol. *Hum Psychopharmacol*. 2012 Jan;27(1):47-56.
- <https://www.clinicaltrials.gov/ct2/show/NCT00536471>

**350. Olie 1997**

- Olie J, Gunn K, Katz E. A double-blind placebo-controlled multicentre study of sertraline in the acute and continuation treatment of major depression. *Eur Psychiatry*. 1997;12(1):34-41.

**351. Olie 2007 (CL3-20098-042)**

- Olie, JP, Kasper, S Efficacy of agomelatine, a MT1/MT2 receptor agonist with 5-HT2C antagonistic properties, in major depressive disorder. *Int J Neuropsychoph* 2007; 10: 661-73.
- [http://www.ema.europa.eu/docs/en\\_GB/document\\_library/EPAR\\_-\\_Public\\_assessment\\_report/human/000916/WC500038315.pdf](http://www.ema.europa.eu/docs/en_GB/document_library/EPAR_-_Public_assessment_report/human/000916/WC500038315.pdf)

**352. Ontiveros 1994 (MY-0144/BRL 29060/1/CPMS-135, PAR135)**

- Ontiveros A, Garcia-Barriga C. A double-blind, comparative study of paroxetine and fluoxetine in out-patients with depression. *Brit J Clin Research*. 1997; 8:23-32.
- <https://www.gsk-clinicalstudyregister.com/study/29060/135#rs>

**353. Ontiveros Sanchez 1998**

- Ontiveros Sánchez JA, Brandi F, Brunner E. Estudio doble-ciego sobre fluoxetina vs amitriptilina en los síntomas depresivos y de ansiedad, y calidad de vida de los adultos con depresión mayor. *Salud Mental*. 1998;21(1):58-63.

**354. Ottevanger 1995**

- Ottevanger EA. Fluvoxamine and clomipramine in depressed hospitalised patients: Results from a randomised, double-blind study. *L Encéphale*. 1995;21(4):317-21.

**355. Ou 2010**

- Ou JJ, Xun GL, Wu RR, Li LH, Fang MS, Zhang HG, Xie SP, Shi JG, Du B, Yuan XQ, Zhao JP. Efficacy and safety of escitalopram versus citalopram in major depressive disorder: a 6-week, multicenter, randomized, double-blind, flexible-dose study. *Psychopharmacology*. 2011; 213(2): 639–46.

**356. PAR 01 001 (GSK & FDA)**

- <http://digitalcommons.ohsu.edu/fdadrug/26/>

**357. PAR 279 MDUK**

- [http://www.gsk-clinicalstudyregister.com/study/29060/012\\_3?search=compound&compound=paroxetine#rs](http://www.gsk-clinicalstudyregister.com/study/29060/012_3?search=compound&compound=paroxetine#rs)

**358. PAR 29060.308 (HP/81/74A)**

- <https://www.gsk-clinicalstudyregister.com/study/29060/308#rs>

**359. PAR 29060.310 (HP 81/85A)**

- <https://www.gsk-clinicalstudyregister.com/study/29060/310#rs>

**360. PAR 29060.314 (HP 82/134)**

- <https://www.gsk-clinicalstudyregister.com/study/29060/314?search=study#rs>

**361. PAR 29060.316 (HP/82/47A)**

- <https://www.gsk-clinicalstudyregister.com/study/29060/316#rs>

**362. PAR 29060.318 (HP/82/64A)**

- <https://www.gsk-clinicalstudyregister.com/study/29060/318#rs>



**363. PAR 29060/281**

- <https://www.gsk-clinicalstudyregister.com/study/29060/281#rs>

**364. PAR MDUK 032**

- <https://www.gsk-clinicalstudyregister.com/study/29060/032#rs>

**365. Patris 1996 (Study 91301 - FDA)**

- Patris M, Bouchard JM, Bougerol T, Charbonnier JF, Chevalier JF, Clerc G, Cyran C, Van Amerongen P, Lemming O, Høpfner-Peterson HE. Citalopram versus fluoxetine: A double-blind, controlled, multicentre, phase III trial in patients with unipolar major depression treated in general practice. *International Clinical Psychopharmacology*. 1996;11(2):129-36.

**366. Paykel 1988**

- Paykel ES, Hollyman JA, Freeling P, Sedgwick P. Predictors of therapeutic benefit from amitriptyline in mild depression: a general practice placebo-controlled trial. *J Affect Disord*. 1988 Jan-Feb;14(1):83-95.

**367. Pélicier 1993 (PAR MDED/29060/III/86/1728M291)**

- Pélicier Y, Schaeffer P. Multicenter double-blind study comparing the efficacy and tolerance of paroxetine and clomipramine in reactive depression in the elderly patient. *L Encéphale*. 1993;19(3):257-61.
- <https://www.gsk-clinicalstudyregister.com/study/29060/291#rs>

**368. Perahia 2006 (HMAY - Study Group B)**

- Perahia DG, Wang F, Mallinckrodt CH, Walker DJ, Detke MJ. Duloxetine in the treatment of major depressive disorder: a placebo- and paroxetine-controlled trial. *Eur Psychiatry* 2006; 21: 367–78.
- <http://www.lillytrials.com/results/Cymbalta.pdf>

**369. Perahia 2008a (HMBU, NCT00071695)**

- Perahia DGS, Pritchett Y, Kajdasz D, Bauer M, Jain R, Russell JM, Walker DJ, Spencer KA, Froud DM, Raskin J, Thase ME. A randomized, double-blind comparison of duloxetine and venlafaxine in the treatment of patients with major depressive disorder. *Journal of Psychiatric Research*. 2008;42(1):22-34.
- <https://www.clinicaltrials.gov/ct2/show/NCT00071695>

**370. Perahia 2008b (HMCQ, NCT00067912)**

- Perahia DGS, Pritchett Y, Kajdasz D, Bauer M, Jain R, Russell JM, Walker DJ, Spencer KA, Froud DM, Raskin J, Thase ME. A randomized, double-blind comparison of duloxetine and venlafaxine in the treatment of patients with major depressive disorder. *Journal of Psychiatric Research*. 2008;42(1):22-34.
- <https://clinicaltrials.gov/ct2/show/NCT00067912>

**371. Pomara 2013**

- Croft HA, Pomara N, Gommoll C, Chen D, Nunez R, Mathews M. Efficacy and Safety of Vilazodone in Major Depressive Disorder: A Randomized, Double-blind, Placebo-controlled Trial. *J Clin Psychiatry*. 2014 Nov;75(11):e1291-8.

**372. Preskorn 1991**

- Preskorn S, Silkey B, Beber J, Dorey C. Antidepressant Response and Plasma Concentrations of Fluoxetine. *Annals of Clinical Psychiatry*. 1991;3(2):147-151.

**373. PZ/109**

- Hieronymus F, Emilsson JF, Nilsson S, Eriksson E. Consistent superiority of selective serotonin reuptake inhibitors over placebo in reducing depressed mood in patients with major depression. *Mol Psychiatry*. 2016 Apr;21(4):523-30.

**374. PZ/111**

- Hieronymus F, Emilsson JF, Nilsson S, Eriksson E. Consistent superiority of selective serotonin reuptake inhibitors over placebo in reducing depressed mood in patients with major depression. *Mol Psychiatry*. 2016 Apr;21(4):523-30.

**375. Quera-Salva 2010 (CL3-20098-056)**

- Quera-Salva MA, Hajak G, Philip P, Montplaisir J, Keufer-Le Gall S, Laredo J, Guilleminault C. Comparison of agomelatine and escitalopram on nighttime sleep and daytime condition and efficacy in major depressive disorder patients. *International Clin psychopharmacology*. 2011;26(5):252-62.
- <https://www.clinicaltrialsregister.eu/ctr-search/trial/2006-004716-48/results>

**376. Raft 1981**

- Raft D, Davidson J, Wasik J, Mattox A. Relationship between response to phenelzine and MAO inhibition in a clinical trial of phenelzine, amitriptyline and placebo. *Neuropsychobiology*. 1981;7(3):122-6.

**377. Rapaport 1996**

- Rapaport M, Coccaro EF, Sheline YI, Perse T, Holland P, Fabre L, Bradford D. A Comparison of Fluvoxamine and Fluoxetine in the Treatment of Major Depression. *Journal of Clinical Psychopharmacology*. 1996;16(5):373-8.

**378. Rapaport 2003 (PAR487)**

- Rapaport MH, Schneider LS, Dunner DL, Davies JT, Pitts CD. Efficacy of controlled-release paroxetine in the treatment of late-life depression. *J Clin Psychiatry* 2003;64(9):1065-74.
- <http://www.gsk-clinicalstudyregister.com/study/29060/487#rs>

**379. Rapaport 2009 (BRL-29060/874, NCT00067444)**

- Rapaport MH, Lydiard RB, Pitts CD, Schaefer D, Bartolic EI, Iyengar M, Carfagno M, Lipschitz A. Low doses of controlled-release paroxetine in the treatment of late-life depression: a randomized, placebo-controlled trial. *J Clin Psychiatry*. 2009 Jan;70(1):46-57.
- <https://www.clinicaltrials.gov/ct2/show/NCT00067444>

**380. Raskin 2007 (HMBV, NCT00062673)**

- Raskin J, Wiltse CG, Siegal A, Sheikh J, Xu J, Dinkel JJ, Rotz BT, Mohs RC. Efficacy of duloxetine on cognition, depression, and pain in elderly patients with major depressive disorder: an 8-week, double-blind, placebo-controlled trial. *Am J Psychiatry* 2007;164(6):900-9.
- <http://www.lillytrials.com/results/Cymbalta.pdf>
- <https://clinicaltrials.gov/ct2/show/NCT00062673>

**381. Ravindran 1995**

- Ravindran AV, Teehan MD, Bakish D, Yatham L, O'Reilly R, Fernando ML, Manchanda R, Charbonneau Y, Buttar J. The impact of sertraline, desipramine, and placebo on psychomotor functioning in depression. *Human Psychopharmacology*. 1995; 10(4):273–281.

**382. Ravindran 1997 (MY-1055/BRL-029060/1/CPMS-245 PAR 245)**

- Ravindran AV, Judge R, Hunter BN, Bray J, Morten NH. A double-blind, multicenter study in primary care comparing paroxetine and clomipramine in subjects with depression and associated anxiety. *J. Clin. Psychiatry*. 1997; 58:112-118.
- <https://www.gsk-clinicalstudyregister.com/study/29060/245#rs>

**383. Reimherr 1990 (SER 104 - FDA)**

- Reimherr FW, Chouinard G, Cohn CK, Cole JO, Itil TM, LaPierre YD, Masco HL, Mendels J. Antidepressant efficacy of sertraline: a double-blind, placebo- and amitriptyline-controlled, multicenter comparison study in outpatients with major depression. *J Clin Psychiatry*. 1990 Dec;51 Suppl B:18-27.
- <http://digitalcommons.ohsu.edu/fdadrug/27/>

**384. Reimherr 1998 (WELL203)**

- Reimherr FW, Cunningham LA, Batey SR, Johnston JA, Ascher JA. A multicenter evaluation of the efficacy and safety of 150 and 300 mg/d sustained-release bupropion tablets versus placebo in depressed outpatients. *Clin Ther*. 1998 May-Jun;20(3):505-16.
- <http://digitalcommons.ohsu.edu/fdadrug/21/>

**385. Remick 1994**

- Remick RA, Reesal R, Oakander M, Allen J, Claman J, Ramirez CE, Perry K, Keller FD. Comparison of fluvoxamine and amitriptyline in depressed outpatients. *Current Therapeutic Research*. 1994;55(3):243-250.

**386. Rickels 1982**

- Rickels K, Case WG. Trazodone in depressed outpatients. *Am J Psychiatry*. 1982 Jun;139(6):803-6.

**387. Rickels 1985**

- Rickels K, Feighner JP, Smith WT. Alprazolam, amitriptyline, doxepin, and placebo in the treatment of depression. *Arch Gen Psychiatry*. 1985 Feb;42(2):134-41.

**388. Rickels 1994 ( FDA CN104-005)**

- Rickels K, Schweizer E, Clary C, Fox I, Weise C. Nefazodone and imipramine in major depression: a placebo-controlled trial. *Br J Psychiatry*. 1994;164(6):802-5.
- <http://digitalcommons.ohsu.edu/fdadrug/23/>

**389. Rickels 1995 (FDA CN104-006-1)**

- Rickels K, Robinson DS, Schweizer E, Marcus RN, Roberts DL. Nefazodone: aspects of efficacy. *J Clin Psychiatry*. 1995;56 Suppl 6:43-6.
- <http://digitalcommons.ohsu.edu/fdadrug/23/>

**390. Rickels 2009 (GNSC-04-DP-02, NCT00285376)**

- Rickels K, Athanasiou M, Robinson DS, Gibertini M, Whalen H, Reed CR. Evidence for efficacy and tolerability of vilazodone in the treatment of major depressive disorder: a randomized, double-blind, placebo-controlled trial. *J Clin Psychiatry*. 2009 Mar;70(3):326-33.
- <https://clinicaltrials.gov/ct2/show/NCT00285376>

**391. Robinson 2014 (NCT00406848)**

- Robinson M, Oakes TM, Raskin J, Liu P, Shoemaker S, Nelson JC. Acute and long-term treatment of late-life major depressive disorder: duloxetine versus placebo. *Am J Geriatr Psychiatry*. 2014 Jan;22(1):34-45.
- <https://clinicaltrials.gov/ct2/show/NCT00406848>

**392. Roffman 1982**

- Roffman M, Gould EE. A Double-blind comparative study of oxaprotiline with amitriptyline and placebo in moderate depression. *Current Therapeutic Research* 1982;32:2247-256.

**393. Roose 2004 (CIT-MD-03)**

- Roose SP, Sackeim HA, Krishnan KR, Pollock BG, Alexopoulos G, Lavretsky H, Katz IR, Hakkarainen H; Old-Old Depression Study Group. Antidepressant pharmacotherapy in the treatment of depression in the very old: a randomized, placebo-controlled trial. *Am J Psychiatry*. 2004 Nov;161(11):2050-9.

**394. Ropert 1989**

- Ropert R. Fluoxetine versus clomipramine in major depressive disorders. *Int Clin Psychopharmacol*. 1989 Jan;4 Suppl 1:89-95.

**395. Rossini 2005**

- Rossini D, Serretti A, Franchini L, Mandelli L, Smeraldi E, De Ronchi D, Zanardi R. Sertraline Versus Fluvoxamine in the Treatment of Elderly Patients With Major Depression *Journal of Clinical Psychopharmacology*. 2005;25(5):471-5.

**396. Roth 1990**

- Roth D, Mattes J, Sheehan KH, Sheehan DV. A double-blind comparison of fluvoxamine, desipramine and placebo in outpatients with depression. *Progress in Neuro-Psychopharmacology and Biological Psychiatry*. 1990;14(6):929-939.

**397. Rouillon 1991 (Limosin 2006, 029060/1/CPMS 069 1991)**

- Rouillon F. A double-blind, multicentre study comparing increasing doses of paroxetine (20-50mg) and clomipramine (50-150mg) in elderly patients with major depression. *World Congress of Biological Psychiatry* 1991:28 (poster presentation)
- Limosin F, Samuelian JC, Rouillon F. Multicenter Double-Blind Study of the Efficacy of Paroxetine versus Clomipramine in Elderly Patients with Major Depression. *Journal of Aging and Pharmacotherapy*. 2006;13(2):7-19.
- <https://www.gsk-clinicalstudyregister.com/study/29060/069#rs>

**398. Rowan 1980**

- Rowan P, Paykel ES, Parker PR, West E. Comparative effects of phenelzine and amitriptyline: a placebo controlled trial. *Neuropharmacology*. 1980 Dec;19(12):1223-5.

**399. Rudolph 1998 (VEN 600A-203 (FDA))**

- Rudolph RL, Fabre LF, Feighner JP, Rickels K, Entsuah R, Derivan AT. A randomized, placebo-controlled, dose-response trial of venlafaxine hydrochloride in the treatment of major depression. *J Clin Psychiatry*. 1998 Mar;59(3):116-22.
- <http://digitalcommons.ohsu.edu/fdadrug/24/>

**400. Rudolph 1999**

- Rudolph RL, Feiger AD. A double-blind, randomized, placebo-controlled trial of once-daily venlafaxine extended release (xr) and fluoxetine for the treatment of depression. *J Affect Disord* 1999; 56: 171-81.

**401. Rush 1998 (excluding Armitage 1997 and Gillin 1997)**

- Rush AJ, Armitage R, Gillin JC, Yonkers KA, Winokur A, Moldofsky H, Vogel GW, Kaplita SB, Fleming JB, Montplaisir J, Erman MK, Albala BJ, McQuade RD. Comparative effects of nefazodone and fluoxetine on sleep in outpatients with major depressive disorder. *Biol Psychiatry*. 1998 Jul 1;44(1):3-14.

**402. Rush 2001**

- Rush AJ, Trivedi MH, Carmody TJ, Donahue RM, Houser TL, Bolden-Watson C, Batey SR, Ascher JA, Metz A. Response in relation to baseline anxiety levels in major depressive disorder treated with bupropion sustained release or sertraline. *Neuropsychopharmacology*. 2001 Jul;25(1):131-8.

**403. Sacchetti 2002 (BRL-29060/109)**

- Sacchetti E, Cassano GB, Penati G, Pavan L, Nardini M, Casacchia M, Pancheri P, Muscettola G, Faravelli C, Aguglia E, Nivoli G, Ravizza L, Castrogiovanni P. Paroxetine versus amitriptyline in patients with recurrent major depression: A double-blind trial. *Int J Psychiatry Clin Pract*. 2002;6(1):23-9.
- <https://www.gsk-clinicalstudyregister.com/study/29060/109#rs>

**404. Sambunaris 2014 (LVM-MD-03, NCT01034462)**

- Sambunaris A, Bose A, Gommoll CP, Chen C, Greenberg WM, Sheehan DV. A phase III, double-blind, placebo-controlled, flexible-dose study of levomilnacipran extended-release in patients with major depressive disorder. *J Clin Psychopharmacol*. 2014 Feb;34(1):47-56.
- <https://clinicaltrials.gov/ct2/show/NCT01034462>

**405. Samuelian 1998**

- Samuelian JC, Hackett D. A Randomized, Double-Blind, Parallel-Group Comparison of Venlafaxine and Clomipramine in Outpatients With Major Depression. *J Psychopharmacol*. 1998;12 (3):273-278.

**406. Sauer 2003**

- Sauer H, Huppertz-Helmhold S, Dierkes W. Efficacy and safety of venlafaxine ER vs. amitriptyline ER in patients with major depression of moderate severity. *Pharmacopsychiatry*. 2003 Sep;36(5):169-75.

**407. Schatzberg 2002 (003-901)**

- Schatzberg AF, Kremer C, Rodrigues HE, Murphy GM Jr: Mirtazapine vs. Paroxetine Study Group. Double-blind, randomized comparison of mirtazapine and paroxetine in elderly depressed patients. *Am J Geriatr Psychiatry*. 2002 Sep-Oct;10(5):541-50.

**408. Schatzberg 2006a**

- Schatzberg A1, Roose S. A double-blind, placebo-controlled study of venlafaxine and fluoxetine in geriatric outpatients with major depression. *Am J Geriatr Psychiatry*. 2006 Apr;14(4):361-70.

**409. Schneider 2003**

- Schneider LS, Nelson JC, Clary CM, Newhouse P, Krishnan KR, Shiovitz T, Weihs K; Sertraline Elderly Depression Study Group. An 8-week multicenter, parallel-group, double-blind, placebo-controlled study of sertraline in elderly outpatients with major depression. *Am J Psychiatry*. 2003 Jul;160(7):1277-85.

**410. Schoene 1993 (Geretsegger 1994, MY1021/BRC)**

- Schöne W, Ludwig M. A double-blind study of paroxetine compared with fluoxetine in geriatric patients with major depression. *J Clin Psychopharmacol.* 1993 Dec;13(6 Suppl 2):34S-39S.

**411. Schwartz 2002 (iQWIG)**

- [https://www.iqwig.de/download/Studie\\_Schwartz\\_et\\_al\\_Poster.pdf](https://www.iqwig.de/download/Studie_Schwartz_et_al_Poster.pdf)

**412. Schweizer 1994 (VEN 600A-301 FDA)**

- Schweizer E, Feighner J, Mandos LA, Rickels K. Comparison of venlafaxine and imipramine in the acute treatment of major depression in outpatients. *J Clin Psychiatry.* 1994 Mar;55(3):104-8.
- <http://digitalcommons.ohsu.edu/fdadrug/24/>

**413. SCT-MD-09**

- Forest Research Institute. Double-blind comparison of the effects of lu 26-054 (escitalopram) and fluoxetine on sleep in depressed patients (SCT-MD-09).

**414. SCT-MD-49 (NCT00668525)**

- <https://clinicaltrials.gov/ct2/show/NCT00668525>

**415. Sechter 1999**

- Sechter D, Troy S, Paternetti S, Boyer P. A double-blind comparison of sertraline and fluoxetine in the treatment of major depressive episode in outpatients. *Eur Psychiatry.* 1999 Mar;14(1):41-8.

**416. Sechter 2004**

- Sechter D, Vandel P, Weiller E, Pezous N, Cabanac F, Tournoux A; study co-coordinators. A comparative study of milnacipran and paroxetine in outpatients with major depression. *J Affect Disord.* 2004 Dec;83(2-3):233-6.

**417. SER 101 (FDA)**

- <http://digitalcommons.ohsu.edu/fdadrug/27/>

**418. SER 310 (FDA)**

- <http://digitalcommons.ohsu.edu/fdadrug/27/>

**419. SER 315 (FDA)**

- <http://digitalcommons.ohsu.edu/fdadrug/27/>

**420. SER-CHN-1**

- <https://www.gsk-clinicalstudyregister.com/study/29060/403#rs>

**421. Settle 1999 (WELL212)**

- Settle EC, Stahl SM, Batey SR, Johnston JA, Ascher JA. Safety profile of sustained-release bupropion in depression: results of three clinical trials. *Clin Ther.* 1999;21(3):454-63.
- <http://digitalcommons.ohsu.edu/fdadrug/21/>

**422. Shaw 1986**

- Shaw DM, Thomas DR, Briscoe MH, Watkins SE, Crimmins R, Harris B, Lovett J, Raj M, Lloyd AT, Osborne C. A comparison of the antidepressant action of citalopram and amitriptyline. *Br J Psychiatry*. 1986 Oct;149:515-7.

**423. Sheehan 2009a**

- Sheehan DV, Nemeroff CB, Thase ME, Entsuah R; EPIC 016 Study Group. Placebo-controlled inpatient comparison of venlafaxine and fluoxetine for the treatment of major depression with melancholic features. *Int Clin Psychopharmacol*. 2009 Mar;24(2):61-86.

**424. Sheehan 2009b (NCT00775203)**

- Sheehan DV, Croft HA, Gossen ER, Levitt RJ, Brullé C, Bouchard S, Rozova A. Extended-release Trazodone in Major Depressive Disorder: A Randomized, Double-blind, Placebo-controlled Study. *Psychiatry (Edgmont)*. 2009;6(5):20-33.
- <https://clinicaltrials.gov/ct2/show/NCT00775203>

**425. Shelton 2006 (NCT00179283)**

- Shipley JE, Kupfer DJ, Spiker DG, Shaw DH, Coble PA, Neil JF, Cofsky J. Neuropsychological assessment and EEG sleep in affective disorders. *Biol Psychiatry*. 1981 Oct;16(10):907-18.
- <https://clinicaltrials.gov/ct2/show/NCT00179283>

**426. Shipley 1981**

- Shipley JE, Kupfer DJ, Spiker DG, Shaw DH, Coble PA, Neil JF, Cofsky J. Neuropsychological assessment and EEG sleep in affective disorders. *Biol Psychiatry*. 1981 Oct;16(10):907-18.

**427. Shu 2014 (CL3-20098-052, ChiCTR-TRC-11001668)**

- Shu L, Sulaiman AH, Huang YS, Fones Soon Leng C, Crutel VS, Kim YS. Comparable efficacy and safety of 8 weeks treatment with agomelatine 25-50mg or fluoxetine 20-40mg in Asian out-patients with major depressive disorder. *Asian J Psychiatr*. 2014 Apr;8:26-32.

**428. Silverstone 1999**

- Silverstone PH, Ravindran A. Once-daily venlafaxine extended release (xr) compared with fluoxetine in outpatients with depression and anxiety. Venlafaxine xr 360 study group. *J Clin Psychiatry* 1999; 60: 22–28.

**429. Sir 2005**

- Sir A, D'Souza RF, Uguz S, George T, Vahip S, Hopwood M, Martin AJ, Lam W, Burt T. Randomized trial of sertraline versus venlafaxine XR in major depression: efficacy and discontinuation symptoms. *J Clin Psychiatry*. 2005 Oct;66(10):1312-20.



**430. Smeraldi 1998**

- Smeraldi E, Aguglia A, Cattaneo M, Cerati C, Covelli C, Del Zompo M, Faravelli C, Gerrari G, Ghirlanda A, Guazzelli G, Mansi M, Ravizza L. Double-blind, randomized study of venlafaxine, clomipramine, and trazodone in geriatric patients with major depression. *Eur Neuropsychopharm.* 1997;7(2):S170.

**431. Smith 1990 (MIR 003-024 FDA)**

- Smith WT, Glaudin V, Panagides J, Gilvary E. Mirtazapine vs Amitriptyline vs Placebo in the treatment of major depressive disorder. *Psychopharmacologi Bulltin* 1990;26:191-195.
- <http://digitalcommons.ohsu.edu/fdadrug/20/>

**432. Sramek 1995**

- Sramek JJ, Kashkin K, Jasinsky O, Kardatzke D, Kennedy S, Cutler NR. Placebo-controlled study of ABT-200 versus fluoxetine in the treatment of major depressive disorder. *Depression* 1995;3:199-203.

**433. Stahl 2000**

- Stahl SM. Placebo-controlled comparison of the selective serotonin reuptake inhibitors citalopram and sertraline. *Biol Psychiatry.* 2000 Nov 1;48(9):894-901.

**434. Stahl 2010 (CAGO178A2302)**

- Stahl, SM, Fava, M, Trivedi, MH, Caputo, A, Shah, A, Post, A Agomelatine in the treatment of major depressive disorder: an 8-week, multicenter, randomized, placebo-controlled trial. *J Clin Psychiat* 2010; 71: 616-26.
- <https://clinicaltrials.gov/ct2/show/NCT00411242>

**435. Staner 1995 (063)**

- <https://www.gsk-clinicalstudyregister.com/study/29060/063?#rs>

**436. Stark 1985 (Study 27 - FDA)**

- Stark P, Hardison CD. A review of multicenter controlled studies of fluoxetine vs. imipramine and placebo in outpatients with major depressive disorder. *J Clin Psychiatry* 1985;46:53-8.
- <http://digitalcommons.ohsu.edu/fdadrug/22/>

**437. Stratas 1984**

- Stratas NE. A double-blind study of the efficacy and safety of dothiepin hydrochloride in the treatment of major depressive disorder. *J Clin Psychiatry.* 1984 Nov;45(11):466-9.

**438. Studie009 (CTN009-FCE20124)**

- <https://www.iqwig.de/de/projekte-ergebnisse/studieninformationen-zu-reboxetin.3304.html>

**439. Studie032 (M2020/0032)**

- [https://www.iqwig.de/download/Studie\\_032.pdf](https://www.iqwig.de/download/Studie_032.pdf)

**440. Study 015**

- <https://www.iqwig.de/de/projekte-ergebnisse/studieninformationen-zu-reboxetin.3304.html>

**441. Study 032a (CTN032-FCE20124)**

- <https://www.iqwig.de/de/projekte-ergebnisse/studieninformationen-zu-reboxetin.3304.html>

**442. Study 043**

- [https://www.iqwig.de/download/Studie\\_043.pdf](https://www.iqwig.de/download/Studie_043.pdf)

**443. Study 045**

- <https://www.iqwig.de/de/projekte-ergebnisse/studieninformationen-zu-reboxetin.3304.html>

**444. Study 049**

- <https://www.iqwig.de/de/projekte-ergebnisse/studieninformationen-zu-reboxetin.3304.html>

**445. Study 19 (FDA) (Fabre 1985)**

- Fabre, LF, Crismon, L. Efficacy of fluoxetine in outpatients with major depression. *Current Therapeutic Research*. 1985;37(1):115-23.
- <http://digitalcommons.ohsu.edu/fdadrug/22/>

**446. Study 205 (FDA) (WELL 205)**

- <http://digitalcommons.ohsu.edu/fdadrug/21/>

**447. Study 25 (FDA) (Rickels 1986)**

- Rickels K, Amsterdam JD, Avallone MF. Fluoxetine in major depression: A controlled study. *Current Therapeutic Research*. 1986;39(4):559-63.
- <http://digitalcommons.ohsu.edu/fdadrug/22/>

**448. Study 62a (FDA) - MILD depression (Dunlop 1990)**

- Dunlop SR, Dornseif BE, Wernicke JR, Potvin JH. Pattern analysis shows beneficial effect of fluoxetine treatment in mild depression. *Psychopharmacology bulletin*. 1990;26(2):173-80.
- <http://digitalcommons.ohsu.edu/fdadrug/22/>

**449. Study 62b (FDA) - MODERATE depression**

- <http://digitalcommons.ohsu.edu/fdadrug/22/>

**450. Study 89306 (FDA)**

- [http://www.accessdata.fda.gov/drugsatfda\\_docs/nda/98/020822a\\_medr\\_P2.pdf](http://www.accessdata.fda.gov/drugsatfda_docs/nda/98/020822a_medr_P2.pdf)

**451. Study F1J-MC-HMAQ - Study Group B (starting page in the pdf document: 147)**

- <http://www.lillytrials.com/results/Cymbalta.pdf>

**452. Szegedi 2006**

- Benkert O, Szegedi A, Philipp M, Kohlen R, Heinrich C, Heukels A, van der Vegte-Senden M, Baker RA, Simmons JH, Schutte AJ. Mirtazapine orally disintegrating tablets versus venlafaxine extended release: a double-blind, randomized multicenter trial comparing the onset of antidepressant response in patients with major depressive disorder. *J Clin Psychopharmacol*. 2006 Feb;26(1):75-8.

**453. Thase 1997 (VEN XR 209 FDA)**

- Thase ME. Efficacy and tolerability of once-daily venlafaxine extended release (XR) in outpatients with major depression. *J Clin Psychiatry*. 1997;58(9):393-8.
- <http://digitalcommons.ohsu.edu/fdadrug/25/>

**454. Thase 2006**

- Thase ME, Clayton AH, Haight BR, Thompson AH, Modell JG, Johnston JA. A double-blind comparison between bupropion XL and venlafaxine XR: sexual functioning, antidepressant efficacy, and tolerability. *J Clin Psychopharmacol*. 2006 Oct;26(5):482-8.

**455. Thomson 1982**

- Thomson J, Rankin H, Ashcroft GW, Yates CM, McQueen JK, Cummings SW. The treatment of depression in general practice: a comparison of L-tryptophan, amitriptyline, and a combination of L-tryptophan and amitriptyline with placebo. *Psychol Med*. 1982 Nov;12(4):741-51.

**456. Tignol 1993 (29060/087)**

- Tignol J. A double-blind, randomized, fluoxetine-controlled, multicenter study of paroxetine in the treatment of depression. *J Clin Psychopharmacol*. 1993 Dec;13(6 Suppl 2):18S-22S.
- <https://www.gsk-clinicalstudyregister.com/study/29060/087>

**457. Timmerman 1993 (Study 89422 – FDA, Haffmans 1996)**

- Haffmans PM, Timmerman L, Hoogduin CA. Efficacy and tolerability of citalopram in comparison with fluvoxamine in depressed outpatients: a double-blind, multicentre study. The LUCIFER Group. *Int Clin Psychopharmacol*. 1996 Sep;11(3):157-64.

**458. Tollefson 1995**

- Tollefson GD, Bosomworth JC, Heiligenstein JH, Potvin JH, Holman S. A double-blind, placebo-controlled clinical trial of fluoxetine in geriatric patients with major depression. The Fluoxetine Collaborative Study Group. *Int Psychogeriatr*. 1995 Spring;7(1):89-104.

**459. Tomarken 2004**

- Tomarken AJ, Dichter GS, Freid C, Addington S, Shelton RC. Assessing the effects of bupropion SR on mood dimensions of depression. *J Affect Disord*. 2004 Mar;78(3):235-41.

**460. Tourian 2009 (NCT00384033)**

- Tourian KA, Padmanabhan SK, Groark J. Desvenlafaxine 50 and 100 mg/d in the Treatment of Major Depressive Disorder: An 8-Week, Phase III, Multicenter, Randomized, Double-Blind, Placebo-Controlled, Parallel Group Trial and a Post Hoc Pooled Analysis of Three Studies. *Clinical Therapeutics* 2009;31:1405-1423.
- <https://clinicaltrials.gov/show/NCT00384033>

**461. Trivedi 2004 (29060/810)**

- Trivedi MH, Pigotti TA, Perera P, Dillingham KE, Carfagno ML, Pitts CD. Effectiveness of low doses of paroxetine controlled release in the treatment of major depressive disorder. *J Clin Psychiatry*. 2004;65(10):1356-64.
- <http://www.gsk-clinicalstudyregister.com/study/29060/810?search=study&#rs>

**462. Tsutsui 2000**

- Tsutsui S, Okuse T, Sasaki D et al. Clinical evaluation of paroxetine HCl, a selective serotonin reuptake inhibitor, in the treatment of depression or depressive episodes: Double-blind, parallel group study with trazodone HCl. *Yakuri-To-Chiryō (Jpn Pharmacol Ther)* 2000; Supplement: 161-185.

**463. Tylee 1997**

- Tylee A, Beaumont G, Bowden MW, Reynolds A. A double-blind, randomized, 12-week comparison study of the safety and efficacy of venlafaxine and fluoxetine in moderate to severe major depression in general practice. *Primary Care Psychiatry*. 1997;3:51-58.

**464. Tzanakaki 2000**

- Tzanakaki M, Guazzelli M, Nimatoudis I, Zissis NP, Smeraldi E, Rizzo F. Increased remission rates with venlafaxine compared with fluoxetine in hospitalized patients with major depression and melancholia. *Int Clin Psychopharmacol*. 2000 Jan;15(1):29-34.

**465. Upward 1988**

- Upward JW, Edwards JG, Goldie A, Waller DG. Comparative effects of fluoxetine and amitriptyline on cardiac function. *Br J Clin Pharmacol*. 1988 Oct; 26(4): 399–402.

**466. Van de Merwe 1984**

- Van de Merwe TJ, Silverstone T, Anker SI, Warrington SJ, Turner P. A double-blind non-crossover placebo-controlled study between group comparison of trazodone and amitriptyline on cardiovascular function in major depressive disorder. *Psychopathology*. 1984;17 Suppl 2:64-76.

**467. Van Moffaert 1995a**

- Van Moffaert M, Bartholome F, Cosyns P, De Nayer AR, Mertens C. A controlled comparison of sertraline and fluoxetine in acute and continuation treatment of major depression. *Human Psychopharm*. 1995;10(5):393–405.

**468. Van Moffaert 1995b**

- Van Moffaert M, de Wilde J, Vereecken A, Dierick M, Evrard JL, Wilmotte J, Mendlewicz J. Mirtazapine is more effective than trazodone: a double-blind controlled study in hospitalized patients with major depression. *Int Clin Psychopharmacol*. 1995 Mar;10(1):3-9.

**469. Vartiainen 1994 (MIR 84023 FDA)**

- Vartiainen H, Leinonen E. Double-blind study of mirtazapine and placebo in hospitalized patients with major depression. *Eur Neuropsychopharmacol*. 1994 Jun;4(2):145-50.
- <http://digitalcommons.ohsu.edu/fdadrug/20/>

**470. VEN 600A-303 (FDA)**

- <http://digitalcommons.ohsu.edu/fdadrug/24/>

**471. VEN 600A-313 (FDA)**

- <http://digitalcommons.ohsu.edu/fdadrug/24/>

**472. VEN XR 367 (FDA)**

- <http://digitalcommons.ohsu.edu/fdadrug/25/>

**473. Ventura 2007 (SCT-MD-18)**

- Ventura D, Armstrong EP, Skrepnek GH, Haim Erder M. Escitalopram versus sertraline in the treatment of major depressive disorder: A randomized clinical trial *Current Medical Research and Opinion*. 2007;23(2):245-50.

**474. Versiani 1999**

- Versiani M, Ontiveros JA, Mazzotti G, Ospina J, Dávila J, Mata S, Pacheco A, Plewes JM, Tamura RN, Palacios M. Fluoxetine versus amitriptyline in the treatment of major depression with associated anxiety (anxious depression): A double-blind comparison. *International Clinical Psychopharmacology*. 1993;8(3):143-9.

**475. Versiani 2000 (Study 091)**

- Versiani M, Amin M, Chouinard G. Double-blind, placebo-controlled study with reboxetine in inpatients with severe major depressive disorder. *J Clin Psychopharmacol*. 2000;20(1):28-34
- <https://www.iqwig.de/de/projekte-ergebnisse/studieninformationen-zu-reboxetin.3304.html>

**476. Versiani 2005**

- Versiani M, Moreno R, Ramakers-van Moorsel CJ, Schutte AJ; Comparative Efficacy Antidepressants Study Group. Comparison of the effects of mirtazapine and fluoxetine in severely depressed patients. *CNS Drugs*. 2005;19(2):137-46.

**477. Wade 2002 (ESC Study 99001 - FDA)**

- Wade A, Michael Lemming O, Bang Hedegaard K. Escitalopram 10 mg/day is effective and well tolerated in a placebo-controlled study in depression in primary care. *Int Clin Psychopharmacol*. 2002;17(3):95-102.
- [http://www.lundbeck.com/upload/trials/files/pdf/completed/99001\\_CTRS\\_final\\_30Dec2005.pdf](http://www.lundbeck.com/upload/trials/files/pdf/completed/99001_CTRS_final_30Dec2005.pdf)

**478. Wade 2003 (E-1721)**

- Wade A, Crawford GM, Angus M, Wilson R, Hamilton L. A randomized, double-blind, 24-week study comparing the efficacy and tolerability of mirtazapine and paroxetine in depressed patients in primary care. *Int Clin Psychopharmacol*. 2003 May;18(3):133-41.

**479. Wade 2007 (Study 10990)**

- Wade A, Gembert K, Florea I. A comparative study of the efficacy of acute and continuation treatment with escitalopram versus duloxetine in patients with major depressive disorder. *Curr Med Res Opin*. 2007 Jul;23(7):1605-14.

**480. Walczak 1996**

- Walczak DD, Apter JT, Halikas JA, Borison RL, Carman JS, Post GL, Patrick R, Cohn JB, Cunningham LA, Rittberg B, Preskorn SH, Kang JS, Wilcox CS. The oral dose-effect relationship for fluvoxamine: a fixed-dose comparison against placebo in depressed outpatients. *Ann Clin Psychiatry*. 1996 Sep;8(3):139-51.

**481. Wang 2014 (EUCTR2005-005052-40, NCT00351169, D1448C00004)**

- Wang G, McIntyre A, Earley WR, Raines SR, Eriksson H. A randomized, double-blind study of the efficacy and tolerability of extended-release quetiapine fumarate (quetiapine XR) monotherapy in patients with major depressive disorder. *Neuropsychiatr Dis Treat*. 2014 Jan 30;10:201-16.

**482. Wang 2015 (NCT01571453, KCT0000432, 13926A)**

- Wang G, Gislum M, Filippov G, Montgomery S. Comparison of vortioxetine versus venlafaxine XR in adults in Asia with major depressive disorder: a randomized, double-blind study. *Curr Med Res Opin*. 2015 Apr;31(4):785-94.
- <https://clinicaltrials.gov/ct2/show/NCT01571453>

**483. Weisler 1994**

- Weisler RH, Johnston JA, Lineberry CG, Samara B, Branconnier RJ, Billow AA. Comparison of bupropion and trazodone for the treatment of major depression. *J Clin Psychopharmacol*. 1994 Jun;14(3):170-9.

**484. WELL 029**

- <http://digitalcommons.ohsu.edu/fdadrug/21/>

**485. WELL AK140016**

- <https://www.gsk-clinicalstudyregister.com/study/AK140016#rs>

**486. WELL AK1A4006**

- <http://digitalcommons.ohsu.edu/fdadrug/21/>

**487. Wellbutrin 06**

- <http://digitalcommons.ohsu.edu/fdadrug/21/>

**488. Wellbutrin 25**

- <http://digitalcommons.ohsu.edu/fdadrug/21/>

**489. Wheatley 1998**

- Wheatley DP, van Moffaert M, Timmerman L, Kremer CM. Mirtazapine: efficacy and tolerability in comparison with fluoxetine in patients with moderate to severe major depressive disorder. Mirtazapine-Fluoxetine Study Group. *J Clin Psychiatry*. 1998 Jun;59(6):306-12.

**490. Wilcox 1994**

- Wilcox CS, Cohn JB, Katz BB, Mijares CP, Guarino JJ, Panagides J, DeFrancisco DF. A double-blind, placebo-controlled study comparing mianserin and amitriptyline in moderately depressed outpatients. *Int Clin Psychopharmacol*. 1994 Winter;9(4):271-9.

**491. Winokur 2003**

- Winokur A, DeMartinis NA 3rd, McNally DP, Gary EM, Cormier JL, Gary KA. Comparative effects of mirtazapine and fluoxetine on sleep physiology measures in patients with major depression and insomnia. *J Clin Psychiatry*. 2003 Oct;64(10):1224-9.

**492. Yang 2003**

- Yang JC, Kim, SW, Yu BH. Milnacipran vs Sertraline in Major Depressive Disorder: A double-blind randomised comparative study on the treatment effect and  $\beta$ -adrenergic receptor responsiveness. *Korean J Psychopharmacol*. 2003;14(4):387-396.

**493. Yevtushenko 2007**

- Yevtushenko VY, Belous AI, Yevtushenko YG, Gusinin SE, Buzik OJ, Agibalova TV. Efficacy and tolerability of escitalopram versus citalopram in major depressive disorder: a 6-week, multicenter, prospective, randomized, double-blind, active-controlled study in adult outpatients. *Clin Ther*. 2007 Nov;29(11):2319-32.

**494. Young 1987**

- Young JP, Coleman A, Lader MH. A controlled comparison of fluoxetine and amitriptyline in depressed out-patients. *Br J Psychiatry*. 1987 Sep;151:337-40.

**495. Zajecka 2010 (CAGO178A2301, NCT00411099)**

- Zajecka J, Schatzberg A, Stahl S. Efficacy and safety of agomelatine in the treatment of major depressive disorder. *J Clin Psychopharm* 2010; 30: 135-44.
- <https://clinicaltrials.gov/ct2/show/NCT00411099>

**496. Zhang 2014**

- Zhang L, Xie WW, Li LH,. Efficacy and safety of prolonged-release trazodone in major depressive disorder. *Pharmacology*. 2014;94(5-6):199-206.

**497. Zivkov 1995 (Organon 85146, FDA85146)**

- Zivkov M, De Jongh GD. Org 3770 versus amitriptyline: A 6-week randomized double-blind multicentre trial in hospitalized depressed patients. *Human Psychopharmacology*. 1995;10(3):173-180.

**498. 845**

- <http://digitalcommons.ohsu.edu/fdadrug/21/>

**499. 003-008 (FDA)**

- <http://digitalcommons.ohsu.edu/fdadrug/20/>

**500. 003-042**

- <http://digitalcommons.ohsu.edu/fdadrug/20/>

**501. 003-048**

- <http://digitalcommons.ohsu.edu/fdadrug/20/>

**502. 030A2-0004/030A2-0005 (FDA)**

- <http://digitalcommons.ohsu.edu/fdadrug/23/>

**503. 03A0A-004A (FDA)**

- <http://digitalcommons.ohsu.edu/fdadrug/23/>

**504. 0600A1-300**

- Unpublished Report-Wyeth Research Philadelphia: a randomized, double-blind comparison of venlafaxine, amitriptyline, and placebo capsules in inpatients with major depression: final report (Protocol: 0600A1-300-US). 19-11-2002.

**505. 0600A1-372**

- Unpublished Report-Wyeth Research Philadelphia: a double-blind, placebo-controlled, parallel-group, comparative study of venlafaxine and fluoxetine in depressed outpatients to measure onset of clinical activity: final report (Protocol 0600A1-372-US). 6-10-1998

**506. 0600A-326**

- Unpublished Study Report-Wyeth-Ayerst France: a randomised, double-blind, parallel group comparison of venlafaxine and clomipramine in outpatients with major depression (Protocol 600A-326). 1991.

**507. 0600A-332**

- Unpublished Report-Wyeth-Ayerst USA: a randomized double-blind comparison of venlafaxine and fluoxetine in outpatients with major depression: final report (Protocol 600A-332-US). 1992.

**508. 0600A-347**

- Unpublished Report-Wyeth Research Philadelphia: a double-blind randomization study of the safety and efficacy of two regimens of venlafaxine compared with one regimen of fluvoxamine: final report (Protocol 0600A1-347-FR/NE). 4-3-2001.

**509. 0600A-349**

- Unpublished Report-Wyeth Research Philadelphia: a double-blind, randomized 8-week, comparative study of the safety and efficacy of venlafaxine and paroxetine: final report (Protocol 0600A1-349-NE/UK). 28-2-2001.

**510. 0600A-626**

- Unpublished Report-Wyeth-Ayerst: a randomised double-blind parallel-group comparison of the efficacy and safety of venlafaxine versus fluoxetine in the treatment of moderately depressed outpatients (Protocol 600A-626-NL). 2007.

**511. 0600A-654**

- Unpublished Report-Wyeth-Ayerst: a double-blind, randomized 12-week study of the safety and efficacy of oral venlafaxine up to 75 mg bid compared with oral fluoxetine up to 20 mg bid in patients with moderate and severe major depression (Protocol 600A-654-AU). 2007.



**512. 0600B1-367**

- Unpublished Study Report-Wyeth-Ayerst France: a randomized, double-blind, placebo controlled, fixed-dose study of the efficacy and safety of venlafaxine extended release and paroxetine in depressed outpatients: final report (Protocol 600B-367-EU). 1996.

**513. 0600B1-384**

- Unpublished Report-Wyeth-Ayerst USA: a double-blind, placebo-controlled, comparative study of an extended release formulation of venlafaxine and imipramine on the time of onset of anti-depressant response in patients with severe major depression: final report (Protocol 600B1-384-US/EU/CA). 12-9-2002.

**514. 0600B1-402**

- Unpublished Report-Wyeth Research Philadelphia: a double-blind, placebo-controlled, comparative efficacy study of venlafaxine ER and sertraline in producing remission in outpatients with major depressive disorder: final report (Protocol 0600B1-402-US/CA). 28-5-2003.

**515. 244 (EMD 68 843-009)**

- [http://www.accessdata.fda.gov/drugsatfda\\_docs/nda/2011/022567Orig1s000MedR.pdf](http://www.accessdata.fda.gov/drugsatfda_docs/nda/2011/022567Orig1s000MedR.pdf)

**516. 245 (EMD 68 843-010)**

- [http://www.accessdata.fda.gov/drugsatfda\\_docs/nda/2011/022567Orig1s000MedR.pdf](http://www.accessdata.fda.gov/drugsatfda_docs/nda/2011/022567Orig1s000MedR.pdf)

**517. 246 (SB 659746-003)**

- [http://www.accessdata.fda.gov/drugsatfda\\_docs/nda/2011/022567Orig1s000MedR.pdf](http://www.accessdata.fda.gov/drugsatfda_docs/nda/2011/022567Orig1s000MedR.pdf)

**518. 247 (SB 659746-014)**

- [http://www.accessdata.fda.gov/drugsatfda\\_docs/nda/2011/022567Orig1s000MedR.pdf](http://www.accessdata.fda.gov/drugsatfda_docs/nda/2011/022567Orig1s000MedR.pdf)

**519. 248 (SB 659746-002)**

- [http://www.accessdata.fda.gov/drugsatfda\\_docs/nda/2011/022567Orig1s000MedR.pdf](http://www.accessdata.fda.gov/drugsatfda_docs/nda/2011/022567Orig1s000MedR.pdf)

**520. 29060 07 001**

- <http://www.gsk-clinicalstudyregister.com/study/29060/07/001#rs>

**521. 29060/299**

- <https://www.gsk-clinicalstudyregister.com/study/29060/299#rs>

**522. 29060/356**

- <https://www.gsk-clinicalstudyregister.com/study/29060/356#rs>

## 2 Characteristics of included studies

| Study Name                          | Year        | No. of arms included in NMA | No of total study arms | Drug          | Sponsored | No. randomized | Mean age (SD) | % Female | Dose (min-max, mg daily) | Dosing Schedule | Mean Dose Delivered | Baseline Severity Scale | Mean Baseline Severity | Length of trial (weeks) | Diagnostic Criteria | Recruitment       | Multi/Single Centre | Treatment Setting       | Patient Status   | Placebo Run in | Rescue Medication |  |  |  |
|-------------------------------------|-------------|-----------------------------|------------------------|---------------|-----------|----------------|---------------|----------|--------------------------|-----------------|---------------------|-------------------------|------------------------|-------------------------|---------------------|-------------------|---------------------|-------------------------|------------------|----------------|-------------------|--|--|--|
| Aberg-Wisted 2000                   | 2000        | 2                           | 2                      | paroxetine    | No        | 177            | *             | *        | 20-40                    | Flexible        | *                   | MADRS                   | 30.70                  | 8                       | DSM-III-R           | Europe            | Multi-center        | Unclear                 | Outpatients only | No             | Unclear           |  |  |  |
|                                     |             |                             |                        | sertraline    | No        | 176            | *             | *        | 50-150                   | Flexible        | *                   | MADRS                   | 30.30                  |                         |                     |                   |                     |                         |                  |                |                   |  |  |  |
| Aguglia 1993                        | 1993        | 2                           | 2                      | sertraline    | No        | 52             | 57.5 (15.5)   | *        | 50-150                   | Flexible        | 72                  | HAMD 17                 | 24.80                  | 8                       | DSM-III-R           | Europe            | Multi-center        | Unclear                 | Outpatients only | Yes            | Unclear           |  |  |  |
|                                     |             |                             |                        | fluoxetine    | No        | 56             | 58.9 (17.3)   | *        | 20-60                    | Flexible        | 28                  | HAMD 17                 | 25.10                  |                         |                     |                   |                     |                         |                  |                |                   |  |  |  |
| AK1102365                           | unpublished | 2                           | 2                      | bupropion     | Yes       | 166            | 36.8 (9.3)    | 0.47     | 200-300                  | Flexible        | *                   | HAMD 17                 | 19.40                  | 12                      | *                   | Asia              | Multi-center        | Unclear                 | Unclear          | No             | Unclear           |  |  |  |
|                                     |             |                             |                        | placebo       | No        | 159            | 36 (8.9)      | 0.44     | 0-0                      | Flexible        | 0                   | HAMD 17                 | 19.80                  |                         |                     |                   |                     |                         |                  |                |                   |  |  |  |
| Alexopoulos 2004 (poster SCT-MD-27) | 2004        | 3                           | 3                      | escitalopram  | Yes       | 136            | 39.5 (10.7)   | *        | 10-20                    | Flexible        | *                   | HAMD 24                 | 26.47                  | 8                       | DSM-IV              | North America     | Multi-center        | Unclear                 | Outpatients only | Unclear        | Unclear           |  |  |  |
|                                     |             |                             |                        | sertraline    | No        | 138            | 40 (11.4)     | *        | 50-200                   | Flexible        | *                   | HAMD 24                 | 26.15                  |                         |                     |                   |                     |                         |                  |                |                   |  |  |  |
|                                     |             |                             |                        | placebo       | No        | 135            | 40.6 (12.3)   | *        | 0-0                      | Flexible        | 0                   | HAMD 24                 | 27.29                  |                         |                     |                   |                     |                         |                  |                |                   |  |  |  |
| Allard 2004                         | 2004        | 2                           | 2                      | citalopram    | No        | 75             | 72.5 (5.7)    | *        | 20-30                    | Flexible        | 26                  | MADRS                   | 27.00                  | 8                       | DSM-IV              | Europe            | Multi-center        | Unclear                 | Outpatients only | No             | Unclear           |  |  |  |
|                                     |             |                             |                        | venlafaxine   | Yes       | 76             | 73.6 (5.9)    | *        | 75-150                   | Flexible        | 116                 | MADRS                   | 27.60                  |                         |                     |                   |                     |                         |                  |                |                   |  |  |  |
| Altamura 1989b                      | 1989        | 2                           | 3                      | amitriptyline | Unclear   | 37             | 66.43 (5.6)   | 0.57     | 75-75                    | Fixed           | 75                  | HAMD 21                 | 29.03                  | 5                       | DSM-III             | Europe            | Multi-center        | Unclear                 | Inpatients only  | Unclear        | Unclear           |  |  |  |
|                                     |             |                             |                        | trazodone     | Unclear   | 36             | 64.61 (5.7)   | 0.61     | 150-150                  | Fixed           | 150                 | HAMD 21                 | 29.68                  |                         |                     |                   |                     |                         |                  |                |                   |  |  |  |
| Alvarez 2012 (11492A, NCT00839423)  | 2012        | 4                           | 4                      | placebo       | No        | 105            | 42 (10.9)     | 0.66     | 0-0                      | Fixed           | 0                   | HAMD 24                 | 29.70                  | 6                       | DSM-IV              | Cross-Continental | Multi-center        | Secondary/Tertiary care | Outpatients only | Unclear        | Yes               |  |  |  |
|                                     |             |                             |                        | vortioxetine  | Yes       | 109            | 43.8 (11.6)   | 0.64     | 5-5                      | Fixed           | 5                   | HAMD 24                 | 29.90                  |                         |                     |                   |                     |                         |                  |                |                   |  |  |  |
|                                     |             |                             |                        | vortioxetine  | Yes       | 101            | 42.3 (13.1)   | 0.65     | 10-10                    | Fixed           | 10                  | HAMD 24                 | 29.30                  |                         |                     |                   |                     |                         |                  |                |                   |  |  |  |
|                                     |             |                             |                        | venlafaxine   | No        | 114            | 45 (10.3)     | 0.54     | 225-225                  | Fixed           | 225                 | HAMD24                  | 29.40                  |                         |                     |                   |                     |                         |                  |                |                   |  |  |  |
| Alves 1999                          | 1999        | 2                           | 2                      | fluoxetine    | No        | 47             | 42.3 (12.2)   | *        | 20-40                    | Flexible        | *                   | HAMD 21                 | 26.90                  | 12                      | DSM-IV              | Europe            | Multi-center        | Unclear                 | Outpatients only | No             | Unclear           |  |  |  |
|                                     |             |                             |                        | venlafaxine   | Yes       | 40             | 45.4 (12)     | *        | 75-150                   | Flexible        | *                   | HAMD 21                 | 27.90                  |                         |                     |                   |                     |                         |                  |                |                   |  |  |  |
| Amin 1984                           | 1984        | 2                           | 3                      | fluvoxamine   | Yes       | 161            | 42 (*)        | *        | *                        | Flexible        | 155                 | HAMD unspecified        | 22.60                  | 4                       | Feighner            | Cross-Continental | Multi-center        | Secondary/Tertiary care | Both             | Unclear        | Unclear           |  |  |  |
|                                     |             |                             |                        | placebo       | No        | 150            | 42 (*)        | *        | 0-0                      | Flexible        | 0                   | HAMD unspecified        | 22.70                  |                         |                     |                   |                     |                         |                  |                |                   |  |  |  |

|                                               |      |   |   |               |         |    |                |      |         |          |     |         |       |   |           |               |               |                          |                  |         |         |
|-----------------------------------------------|------|---|---|---------------|---------|----|----------------|------|---------|----------|-----|---------|-------|---|-----------|---------------|---------------|--------------------------|------------------|---------|---------|
| Amini 2005                                    | 2005 | 2 | 2 | mirtazapine   | No      | 18 | 35<br>(10.6)   | *    | 30-30   | Fixed    | 30  | HAMD 17 | 25.80 | 6 | DSM-IV    | Asia          | Single center | Secondary /Tertiary care | Both             | No      | Unclear |
|                                               |      |   |   | fluoxetine    | No      | 18 | 37.7<br>(11.3) | *    | 20-20   | Fixed    | 20  | HAMD 17 | 24.80 |   |           |               |               |                          |                  |         |         |
| Amsterdam 1986                                | 1986 | 2 | 3 | amitriptyline | No      | 55 | 41<br>(12)     | *    | 200-300 | Flexible | 182 | HAMD 21 | 24.5  | 4 | RDC       | North America | Single center | Secondary /Tertiary care | Outpatients only | Yes     | Yes     |
|                                               |      |   |   | placebo       | No      | 54 | 41<br>(12)     | *    | 0-0     | Flexible | 0   | HAMD 21 | 23.4  |   |           |               |               |                          |                  |         |         |
| Andersen 1986                                 | 1986 | 2 | 2 | citalopram    | Unclear | 57 | *              | 0.70 | 40-40   | Fixed    | 40  | HAMD 17 | 22.5  | 5 | *         | Europe        | Multi-center  | Secondary /Tertiary care | Inpatients only  | Yes     | Yes     |
|                                               |      |   |   | clomipramine  | Unclear | 57 | *              | 0.69 | 150-150 | Fixed    | 150 | HAMD17  | 22    |   |           |               |               |                          |                  |         |         |
| Anseau 1989a                                  | 1989 | 3 | 3 | milnacipran   | Unclear | 47 | 48.6<br>(10.9) | 0.66 | 50-50   | Fixed    | 50  | HAMD 17 | 25.10 | 4 | RDC       | Europe        | Multi-center  | Secondary /Tertiary care | Inpatients only  | Yes     | Yes     |
|                                               |      |   |   | milnacipran   | Unclear | 48 | 48.6<br>(10.9) | 0.66 | 100-100 | Fixed    | 100 | HAMD 17 | 24.40 |   |           |               |               |                          |                  |         |         |
|                                               |      |   |   | amitriptyline | No      | 49 | 48.6(10.9)     | 0.66 | 150-150 | Fixed    | 150 | HAMD 17 | 24.80 |   |           |               |               |                          |                  |         |         |
| Anseau 1989b                                  | 1989 | 2 | 2 | milnacipran   | Unclear | 44 | 49.6<br>(11.6) | *    | 200-200 | Fixed    | 200 | HAMD 24 | 37.30 | 4 | RDC       | Europe        | Multi-center  | Secondary /Tertiary care | Inpatients only  | Yes     | Yes     |
|                                               |      |   |   | amitriptyline | No      | 43 | 49.6<br>(11.6) | *    | 150-150 | Fixed    | 150 | HAMD 24 | 37.60 |   |           |               |               |                          |                  |         |         |
| Anseau 1991                                   | 1991 | 3 | 3 | fluvoxamine   | Unclear | 41 | 46.6<br>(11.6) | *    | 200-200 | Fixed    | 200 | HAMD 24 | 32.69 | 4 | RDC       | Europe        | Multi-center  | Secondary /Tertiary care | Inpatients only  | Yes     | Yes     |
|                                               |      |   |   | milnacipran   | Unclear | 42 | 49.9<br>(12.4) | *    | 150-150 | Fixed    | 150 | HAMD 24 | 33.94 |   |           |               |               |                          |                  |         |         |
|                                               |      |   |   | milnacipran   | Unclear | 43 | 46.5<br>(13.3) | *    | 200-200 | Fixed    | 200 | HAMD 24 | 31.89 |   |           |               |               |                          |                  |         |         |
| Anseau 1994a (MY-1005/BRL-029060/1/CPM S-112) | 1994 | 2 | 2 | paroxetine    | Yes     | 55 | 43.7<br>(11.5) | 0.46 | 20-30   | Flexible | *   | HAMD 21 | 26.00 | 6 | DSM-III-R | Europe        | Multi-center  | Other/Unclear            | Other/Unclear    | Yes     | Unclear |
|                                               |      |   |   | fluvoxamine   | No      | 65 | 43.4<br>(9.9)  | 0.67 | 100-200 | Flexible | *   | HAMD 21 | 26.50 |   |           |               |               |                          |                  |         |         |
| Anseau 1994b                                  | 1994 | 2 | 2 | milnacipran   | Yes     | 97 | 44.8<br>(11.2) | *    | 100-100 | Fixed    | 100 | HAMD 24 | 30.60 | 6 | DSM-III-R | Europe        | Multi-center  | Secondary /Tertiary care | Outpatients only | Yes     | Yes     |
|                                               |      |   |   | fluoxetine    | No      | 93 | 45<br>(12.3)   | *    | 20-20   | Fixed    | 20  | HAMD 24 | 32.40 |   |           |               |               |                          |                  |         |         |
| Anseau 1994c                                  | 1994 | 2 | 2 | nefazodone    | Yes     | 55 | 45.8<br>(12.6) | 0.73 | 100-400 | Flexible | 242 | HAMD 17 | 27.70 | 6 | DSM-III-R | Europe        | Multi-center  | Secondary /Tertiary care | Inpatients only  | Unclear | Yes     |
|                                               |      |   |   | amitriptyline | No      | 51 | 48.6<br>(13.6) | 0.67 | 50-200  | Flexible | 124 | HAMD 17 | 28.10 |   |           |               |               |                          |                  |         |         |
| Armitage 1997                                 | 1997 | 2 | 2 | nefazodone    | Yes     | 22 | 37.1<br>(8.4)  | 0.50 | 400-500 | Flexible | 433 | HAMD 17 | 23.50 | 8 | DSM-III-R | North America | Multi-center  | Other/Unclear            | Outpatients only | Unclear | Unclear |
|                                               |      |   |   | fluoxetine    | No      | 21 | 37.2<br>(10.5) | 0.76 | 20-40   | Flexible | 31  | HAMD 17 | 23.60 |   |           |               |               |                          |                  |         |         |

|                                               |      |   |   |                     |         |     |                |      |         |          |     |         |       |    |               |                       |                  |                                |                     |         |         |  |  |
|-----------------------------------------------|------|---|---|---------------------|---------|-----|----------------|------|---------|----------|-----|---------|-------|----|---------------|-----------------------|------------------|--------------------------------|---------------------|---------|---------|--|--|
| Asnis 2013<br>(LVM-MD-01,<br>NCT00969709)     | 2013 | 4 | 4 | placebo             | No      | 179 | 41.3<br>(11.3) | 0.61 | 0-0     | Fixed    | 0   | HAMD 17 | 24.60 | 8  | DSM-IV        | North<br>America      | Multi-<br>center | Unclear                        | Outpatients<br>only | Yes     | Yes     |  |  |
|                                               |      |   |   | levomilnacip<br>ran | Yes     | 181 | 41.6<br>(13.1) | 0.69 | 40-40   | Fixed    | 40  | HAMD 17 | 24.70 |    |               |                       |                  |                                |                     |         |         |  |  |
|                                               |      |   |   | levomilnacip<br>ran | Yes     | 181 | 41<br>(12.8)   | 0.62 | 80-80   | Fixed    | 80  | HAMD 17 | 24.90 |    |               |                       |                  |                                |                     |         |         |  |  |
|                                               |      |   |   | levomilnacip<br>ran | Yes     | 183 | 40.3<br>(11.9) | 0.59 | 120-120 | Fixed    | 120 | HAMD 17 | 25.00 |    |               |                       |                  |                                |                     |         |         |  |  |
| Bakish 1992                                   | 1992 | 2 | 3 | amitriptyline       | No      | 58  | 42 (9)         | *    | 50-150  | Flexible | 112 | HAMD 17 | 22.81 | 6  | DSM-<br>III-R | North<br>America      | Multi-<br>center | Unclear                        | Outpatients<br>only | Yes     | Yes     |  |  |
|                                               |      |   |   | placebo             | No      | 56  | 44<br>(10.7)   | *    | 0-0     | Flexible | 0   | HAMD 17 | 23.04 |    |               |                       |                  |                                |                     |         |         |  |  |
| Bakish 1997                                   | 1997 | 2 | 2 | fluoxetine          | No      | 9   | 39 (9)         | 0.62 | 20-80   | Flexible | *   | HAMD 17 | 22.30 | 12 | DSM-<br>III-R | North<br>America      | Unclear          | Unclear                        | Other/Unclea<br>r   | Unclear | Yes     |  |  |
|                                               |      |   |   | paroxetine          | Yes     | 12  | 39 (9)         | 0.62 | 20-50   | Flexible | *   | HAMD 17 | 22.30 |    |               |                       |                  |                                |                     |         |         |  |  |
| Bakish 2014<br>(LVM-MD-10,<br>NCT01377194)    | 2014 | 3 | 3 | placebo             | No      | 189 | 42.3<br>(13.2) | 0.62 | 0-0     | Fixed    | 0   | MADRS   | 31.00 | 8  | DSM-IV        | North<br>America      | Multi-<br>center | Unclear                        | Outpatients<br>only | Yes     | Unclear |  |  |
|                                               |      |   |   | levomilnacip<br>ran | Yes     | 190 | 42.9<br>(13.4) | 0.62 | 40-40   | Fixed    | 40  | MADRS   | 30.80 |    |               |                       |                  |                                |                     |         |         |  |  |
|                                               |      |   |   | levomilnacip<br>ran | Yes     | 189 | 43.1<br>(12.8) | 0.66 | 80-80   | Fixed    | 80  | MADRS   | 31.20 |    |               |                       |                  |                                |                     |         |         |  |  |
| Baldwin 1996                                  | 1996 | 2 | 2 | nefazodone          | Yes     | 105 | 38.3<br>(*)    | 0.60 | 200-600 | Flexible | 472 | HAMD 17 | 24.60 | 8  | DSM-<br>III-R | Europe                | Multi-<br>center | Secondary<br>/Tertiary<br>care | Outpatients<br>only | Unclear | Yes     |  |  |
|                                               |      |   |   | paroxetine          | No      | 101 | 37.9<br>(*)    | 0.50 | 20-40   | Flexible | 33  | HAMD 17 | 24.80 |    |               |                       |                  |                                |                     |         |         |  |  |
| Baldwin 2006a<br>(97-CRBX-052 -<br>Study 052) | 2006 | 2 | 2 | reboxetine          | Yes     | 159 | 42.4<br>(12.1) | 0.63 | 8-10    | Flexible | 9   | HAMD 17 | 24.20 | 8  | DSM-IV        | Europe                | Multi-<br>center | Other/Unc<br>lear              | Other/Unclea<br>r   | Unclear | Yes     |  |  |
|                                               |      |   |   | paroxetine          | No      | 166 | 45.1<br>(11)   | 0.62 | 20-40   | Flexible | 27  | HAMD 17 | 24.10 |    |               |                       |                  |                                |                     |         |         |  |  |
| Baldwin 2006b<br>(Study 99505)                | 2006 | 2 | 2 | paroxetine          | No      | 159 | 45.1<br>(13.2) | *    | 20-40   | Flexible | 26  | MADRS   | 29.70 | 8  | DSM-<br>III-R | Europe                | Multi-<br>center | Other/Unc<br>lear              | Other/Unclea<br>r   | Yes     | Unclear |  |  |
|                                               |      |   |   | escitalopram        | Yes     | 166 | 44.9<br>(14.7) | *    | 10-20   | Flexible | 14  | MADRS   | 29.60 |    |               |                       |                  |                                |                     |         |         |  |  |
| Baldwin 2012<br>(11984A,<br>NCT00635219)      | 2012 | 4 | 5 | placebo             | No      | 152 | 43.3<br>(12.5) | 0.70 | 0-0     | Fixed    | 0   | HAMD 24 | 29.80 | 8  | DSM-IV        | Cross-<br>Continental | Multi-<br>center | Secondary<br>/Tertiary<br>care | Both                | Unclear | Yes     |  |  |
|                                               |      |   |   | vortioxetine        | Yes     | 159 | 44.7<br>(13.1) | 0.66 | 5-5     | Fixed    | 5   | HAMD 24 | 31.30 |    |               |                       |                  |                                |                     |         |         |  |  |
|                                               |      |   |   | vortioxetine        | Yes     | 153 | 45.2<br>(13.1) | 0.68 | 10-10   | Fixed    | 10  | HAMD 24 | 30.40 |    |               |                       |                  |                                |                     |         |         |  |  |
|                                               |      |   |   | duloxetine          | No      | 157 | 45.3<br>(12)   | 0.68 | 60-60   | Fixed    | 60  | HAMD 24 | 29.90 |    |               |                       |                  |                                |                     |         |         |  |  |
| Ban 1998<br>(Study 008)                       | 1998 | 2 | 3 | reboxetine          | Unclear | 84  | 46.4<br>(11.4) | 0.50 | 8-8     | Fixed    | 8   | HAMD 17 | 26.89 | 4  | DSM-<br>III-R | Cross-<br>Continental | Multi-<br>center | Secondary<br>/Tertiary<br>care | Inpatients<br>only  | No      | Yes     |  |  |
|                                               |      |   |   | placebo             | No      | 85  | 46.7<br>(11.8) | 0.64 | 0-0     | Fixed    | 0   | HAMD 17 | 25.43 |    |               |                       |                  |                                |                     |         |         |  |  |

|                                                |      |   |   |               |         |     |                |      |         |          |     |         |       |    |           |                   |               |                          |                  |         |         |
|------------------------------------------------|------|---|---|---------------|---------|-----|----------------|------|---------|----------|-----|---------|-------|----|-----------|-------------------|---------------|--------------------------|------------------|---------|---------|
| Barber 2011                                    | 2011 | 2 | 3 | sertraline    | No      | 55  | 38<br>(12.5)   | *    | 50-200  | Fixed    | 200 | HAMD 17 | 19.00 | 16 | DSM-IV    | North America     | Multi-center  | Secondary /Tertiary care | Outpatients only | No      | Unclear |
|                                                |      |   |   | placebo       | No      | 50  | 38.3<br>(12)   | *    | 0-0     | Fixed    | 0   | HAMD 17 | 19.3  |    |           |                   |               |                          |                  |         |         |
| Battegay 1985<br>(PAR 29060.309<br>HP/81/162A) | 1985 | 2 | 2 | paroxetine    | Yes     | 11  | 41.5<br>(11.3) | 0.55 | 30-30   | Fixed    | 30  | *       | *     | 7  | *         | Europe            | Single center | Unclear                  | Unclear          | Unclear | Unclear |
|                                                |      |   |   | amitriptyline | No      | 10  | 36.9<br>(10.8) | 0.60 | 100-100 | Fixed    | 100 | *       | *     |    |           |                   |               |                          |                  |         |         |
| Beasley 1991                                   | 1991 | 2 | 2 | trazodone     | No      | 61  | 40<br>(10.8)   | 0.69 | 50-400  | Flexible | 244 | HAMD 21 | 24.30 | 6  | DSM-III   | North America     | Multi-center  | Unclear                  | Outpatients only | Yes     | Yes     |
|                                                |      |   |   | fluoxetine    | Yes     | 65  | 40<br>(11.3)   | 0.65 | 20-60   | Flexible | 21  | HAMD 21 | 23.40 |    |           |                   |               |                          |                  |         |         |
| Behnke 2003<br>(E-1690,<br>Kjernisted<br>2002) | 2003 | 2 | 2 | mirtazapine   | Yes     | 176 | 42<br>(11)     | *    | 30-45   | Flexible | 38  | HAMD 17 | *     | 8  | DSM-IV    | Cross-Continental | Multi-center  | Both                     | Unclear          | No      | Unclear |
|                                                |      |   |   | sertraline    | No      | 170 | 41<br>(12)     | *    | 50-150  | Flexible | 93  | HAMD 17 | *     |    |           |                   |               |                          |                  |         |         |
| Benkert 2000<br>(E-1559)                       | 2000 | 2 | 2 | mirtazapine   | Yes     | 139 | 47.2<br>(11.1) | *    | 15-45   | Flexible | 33  | HAMD 17 | 22.40 | 6  | DSM-IV    | Europe            | Multi-center  | Both                     | Outpatients only | Yes     | Unclear |
|                                                |      |   |   | paroxetine    | No      | 136 | 47.3<br>(10.3) | *    | 20-40   | Flexible | 23  | HAMD 17 | 22.40 |    |           |                   |               |                          |                  |         |         |
| Benkert<br>2006(C-1763)                        | 2006 | 2 | 2 | mirtazapine   | Yes     | 140 | 46.4<br>(11.1) | 0.56 | 45-45   | Fixed    | 45  | HAMD 17 | 24.60 | 6  | DSM-IV    | Europe            | Multi-center  | Unclear                  | Outpatients only | No      | Unclear |
|                                                |      |   |   | venlafaxine   | No      | 135 | 45.1<br>(12.7) | 0.59 | 225-225 | Fixed    | 225 | HAMD17  | 24.90 |    |           |                   |               |                          |                  |         |         |
| Bennie 1995                                    | 1995 | 2 | 2 | sertraline    | Yes     | 142 | 49.9<br>(*)    | *    | 50-100  | Flexible | 62  | HAMD 17 | 23.20 | 6  | DSM-III-R | Europe            | Multi-center  | Secondary /Tertiary care | Outpatients only | Yes     | Yes     |
|                                                |      |   |   | fluoxetine    | No      | 144 | 49.9<br>(*)    | *    | 20-40   | Flexible | 25  | HAMD 17 | 23.40 |    |           |                   |               |                          |                  |         |         |
| Berlanga 1997                                  | 1997 | 2 | 2 | nefazodone    | Yes     | 37  | 41.5<br>(12.8) | 0.78 | 400-500 | Flexible | 400 | HAMD 17 | 25.10 | 8  | DSM-III-R | South America     | Multi-center  | Unclear                  | Outpatients only | Unclear | Yes     |
|                                                |      |   |   | fluoxetine    | No      | 37  | 39.9<br>(13.4) | 0.76 | 20-40   | Flexible | 24  | HAMD 17 | 23.70 |    |           |                   |               |                          |                  |         |         |
| Berlanga 2006                                  | 2006 | 2 | 2 | reboxetine    | No      | 46  | 29.2<br>(6)    | *    | 4-8     | Flexible | *   | HAMD 21 | 26.99 | 8  | DSM-IV    | South America     | Single center | Secondary /Tertiary care | Outpatients only | No      | No      |
|                                                |      |   |   | citalopram    | Yes     | 55  | 29.65<br>(7.3) | *    | 20-40   | Flexible | *   | HAMD21  | 27.15 |    |           |                   |               |                          |                  |         |         |
| Bersani 1994                                   | 1994 | 2 | 2 | sertraline    | Unclear | 34  | 47.2<br>(12)   | 0.63 | 50-150  | Flexible | 88  | HAMD 21 | 33    | 8  | DSM-III-R | Europe            | Unclear       | Unclear                  | Outpatients only | Unclear | No      |
|                                                |      |   |   | amitriptyline | Unclear | 34  | 46.9<br>(12)   | 0.63 | 50-150  | Flexible | 84  | HAMD 21 | 32    |    |           |                   |               |                          |                  |         |         |
| Bhatia 1991                                    | 1991 | 2 | 3 | amitriptyline | No      | 7   | 38<br>(15.1)   | *    | 200-300 | Flexible | 250 | HAMD 17 | 32.92 | 6  | DSM-III   | North America     | Multi-center  | Secondary /Tertiary care | Inpatients only  | No      | Unclear |
|                                                |      |   |   | placebo       | No      | 8   | 45.6<br>(10.2) | *    | 0-0     | Flexible | 0   | HAMD 17 | 32.92 |    |           |                   |               |                          |                  |         |         |
| Bielski 2004<br>(SCT-MD-12)                    | 2004 | 2 | 2 | escitalopram  | Yes     | 101 | 37.3<br>(12.3) | *    | 20-20   | Fixed    | 20  | HAMD 24 | 28.60 | 8  | DSM-IV    | North America     | Multi-center  | Secondary /Tertiary care | Outpatients only | Yes     | Unclear |
|                                                |      |   |   | venlafaxine   | No      | 101 | 37.5<br>(11.6) | *    | 225-225 | Fixed    | 225 | HAMD 24 | 27.40 |    |           |                   |               |                          |                  |         |         |

|                                                 |             |   |   |                |         |     |             |      |         |          |     |                  |       |    |           |                   |              |                         |                  |         |         |  |  |  |
|-------------------------------------------------|-------------|---|---|----------------|---------|-----|-------------|------|---------|----------|-----|------------------|-------|----|-----------|-------------------|--------------|-------------------------|------------------|---------|---------|--|--|--|
| Bignamini 1992 (PAR 29060/078)                  | 1992        | 2 | 2 | paroxetine     | Yes     | 156 | 49.1 (13.8) | *    | 20-30   | Flexible | *   | HAMD 21          | 30.50 | 6  | DSM-III   | Europe            | Multi-center | Unclear                 | Outpatients only | Unclear | Unclear |  |  |  |
|                                                 |             |   |   | amitriptyline  | No      | 153 | 49.8 (11.9) | *    | 75-150  | Flexible | *   | HAMD 21          | 30.90 |    |           |                   |              |                         |                  |         |         |  |  |  |
| Binnemann 2008 (NCT00143091)                    | 2008        | 2 | 3 | sertraline     | Yes     | 43  | 49 (*)      | *    | 100-100 | Fixed    | 100 | HAMD 17          | 23.30 | 6  | DSM-IV    | Cross-Continental | Multi-center | Unclear                 | Outpatients only | Yes     | Unclear |  |  |  |
|                                                 |             |   |   | placebo        | No      | 39  | 49 (*)      | *    | 0-0     | Fixed    | 0   | HAMD 17          | 23.55 |    |           |                   |              |                         |                  |         |         |  |  |  |
| Bjerkstedt 2005                                 | 2005        | 2 | 3 | fluoxetine     | No      | 57  | 50.4 (11.6) | *    | 20-20   | Fixed    | 20  | HAMD 21          | 23.80 | 6  | DSM-IV    | Europe            | Multi-center | Primary care            | Outpatients only | Yes     | Unclear |  |  |  |
|                                                 |             |   |   | placebo        | No      | 58  | 51.4 (11.8) | *    | 0-0     | Fixed    | 0   | HAMD 21          | 25.20 |    |           |                   |              |                         |                  |         |         |  |  |  |
| Blacker 1988                                    | 1988        | 2 | 4 | amitriptyline  | No      | 44  | 42 (12.5)   | *    | 100-100 | Fixed    | 100 | HAMD 21          | 26.70 | 6  | DSM-III   | Europe            | Multi-center | Primary care            | Outpatients only | Unclear | Unclear |  |  |  |
|                                                 |             |   |   | trazodone      | Unclear | 112 | 45 (12.8)   | *    | 150-150 | Fixed    | 150 | HAMD 21          | 26.30 |    |           |                   |              |                         |                  |         |         |  |  |  |
| Bosc 1997a (Study 014 - Andreoli2002)           | 1997        | 3 | 3 | reboxetine     | Yes     | 126 | 40 (12)     | 0.67 | 8-10    | Flexible | *   | HAMD 21          | 26.80 | 8  | DSM-III-R | Cross-Continental | Multi-center | Unclear                 | Outpatients only | No      | Yes     |  |  |  |
|                                                 |             |   |   | placebo        | No      | 128 | 44.1 (12.1) | 0.54 | 0-0     | Flexible | 0   | HAMD 21          | 27.40 |    |           |                   |              |                         |                  |         |         |  |  |  |
|                                                 |             |   |   | fluoxetine     | No      | 127 | 40.2 (11.5) | 0.65 | 20-40   | Flexible | *   | HAMD 21          | 26.90 |    |           |                   |              |                         |                  |         |         |  |  |  |
| Bosc 1997b (Study 016 - Massana 1999)           | 1997        | 2 | 2 | reboxetine     | Yes     | 79  | 44 (12.6)   | 0.72 | 8-10    | Flexible | 8   | HAMD 21          | 28.60 | 8  | DSM-III-R | Cross-Continental | Multi-center | Unclear                 | Both             | Unclear | Yes     |  |  |  |
|                                                 |             |   |   | fluoxetine     | No      | 89  | 43.6 (11.8) | 0.72 | 20-40   | Flexible | 23  | HAMD 21          | 27.40 |    |           |                   |              |                         |                  |         |         |  |  |  |
| Bose 2008 (SCT-MD-13)                           | unpublished | 2 | 2 | escitalopram   | Yes     | 132 | 68.1 (6.7)  | *    | 10-20   | Flexible | *   | HAMD unspecified | 24.90 | 12 | DSM-IV    | North America     | Multi-center | Unclear                 | Outpatients only | Unclear | Unclear |  |  |  |
|                                                 |             |   |   | placebo        | No      | 135 | 68.5 (7.1)  | *    | 0-0     | Flexible | 0   | HAMD unspecified | 24.30 |    |           |                   |              |                         |                  |         |         |  |  |  |
| Bougerol 1997 (Study 91302 - FDA)               | 1997        | 2 | 2 | fluoxetine     | No      | 158 | 41 (*)      | *    | 20-20   | Fixed    | 20  | MADRS            | 31.80 | 8  | DSM-III-R | Europe            | Multi-center | Secondary/Tertiary care | Other/Unclear    | No      | Yes     |  |  |  |
|                                                 |             |   |   | citalopram     | Yes     | 158 | 43 (*)      | *    | 40-40   | Fixed    | 40  | MADRS            | 31.20 |    |           |                   |              |                         |                  |         |         |  |  |  |
| Boulenger 2006 (Study 10351)                    | 2006        | 2 | 2 | escitalopram   | Yes     | 232 | 43.8 (12.5) | *    | 20-20   | Fixed    | 20  | MADRS            | 35.20 | 24 | DSM-IV    | Europe            | Multi-center | Both                    | Outpatients only | No      | Unclear |  |  |  |
|                                                 |             |   |   | paroxetine     | Yes     | 227 | 44.7 (13)   | *    | 40-40   | Fixed    | 40  | MADRS            | 34.80 |    |           |                   |              |                         |                  |         |         |  |  |  |
| Boulenger 2014 (13267A, NCT01140906)            | 2014        | 4 | 4 | placebo        | No      | 158 | 48.1 (13.1) | 0.70 | 0-0     | Fixed    | 0   | MADRS            | 31.50 | 8  | DSM-IV    | Cross-Continental | Multi-center | Secondary/Tertiary care | Both             | Unclear | Yes     |  |  |  |
|                                                 |             |   |   | vortioxetine   | Yes     | 152 | 47 (14.6)   | 0.64 | 15-15   | Fixed    | 15  | MADRS            | 31.80 |    |           |                   |              |                         |                  |         |         |  |  |  |
|                                                 |             |   |   | vortioxetine   | Yes     | 151 | 46.2 (13.4) | 0.60 | 20-20   | Fixed    | 20  | MADRS            | 31.20 |    |           |                   |              |                         |                  |         |         |  |  |  |
|                                                 |             |   |   | duloxetine     | No      | 147 | 45.6 (13.6) | 0.69 | 60-60   | Fixed    | 60  | MADRS            | 31.20 |    |           |                   |              |                         |                  |         |         |  |  |  |
| Boyer 2008 (Study 333, NCT00300378)( EUCTR2005- | 2008        | 3 | 3 | desvenlafaxine | Yes     | 166 | 44 (14)     | 0.70 | 50-50   | Fixed    | 50  | HAMD 17          | 24.26 | 8  | DSM-IV    | Cross-Continental | Multi-center | Both                    | Outpatients only | Unclear | Unclear |  |  |  |
|                                                 |             |   |   | desvenlafaxine | Yes     | 158 | 46 (13)     | 0.71 | 100-100 | Fixed    | 100 | HAMD 17          | 24.44 |    |           |                   |              |                         |                  |         |         |  |  |  |

|                                        |                 |   |   |               |         |     |                |      |         |                   |     |                     |       |    |               |                  |                  |                                    |                     |         |         |
|----------------------------------------|-----------------|---|---|---------------|---------|-----|----------------|------|---------|-------------------|-----|---------------------|-------|----|---------------|------------------|------------------|------------------------------------|---------------------|---------|---------|
| 005463-28,<br>3151A1-333-<br>EU)       |                 |   |   | placebo       | No      | 161 | 46<br>(12)     | 0.68 | 0-0     | Fixed             | 0   | HAMD 17             | 24.29 |    |               |                  |                  |                                    |                     |         |         |
| Bremner<br>1995(MIR 003-<br>022 - FDA) | 1995            | 3 | 3 | amitriptyline | No      | 50  | 39 (*)         | *    | 40-280  | Flexible          | 187 | HAMD 21             | 32    | 6  | DSM-III       | North<br>America | Single<br>center | Secondary<br>/Tertiary<br>care     | Outpatients<br>only | Yes     | Yes     |
|                                        |                 |   |   | placebo       | No      | 50  | 37 (*)         | *    | 0-0     | Flexible          | 0   | HAMD 21             | 31.2  |    |               |                  |                  |                                    |                     |         |         |
|                                        |                 |   |   | mirtazapine   | Yes     | 50  | 39 (*)         | *    | 5-35    | Flexible          | 31  | HAMD 21             | 33    |    |               |                  |                  |                                    |                     |         |         |
| Brown 1986                             | 1986            | 2 | 3 | fluvoxamine   | Unclear | 33  | 33.4<br>(*)    | *    | 200-300 | Flexible          | 214 | HAMD 21             | *     | 6  | DSM-III       | North<br>America | Multi-<br>center | Secondary<br>/Tertiary<br>care     | Outpatients<br>only | Unclear | Unclear |
|                                        |                 |   |   | placebo       | No      | 31  | *              | *    | 0-0     | Flexible          | 0   | HAMD 21             | *     |    |               |                  |                  |                                    |                     |         |         |
| Brunoni 2012                           | 2012            | 2 | 4 | sertraline    | No      | 30  | 41<br>(12)     | *    | 50-50   | Fixed             | 50  | MADRS               | 30.5  | 6  | DSM-IV        | South<br>America | Single<br>center | Secondary<br>/<br>Tertiary<br>care | Outpatients<br>only | No      | Yes     |
|                                        |                 |   |   | placebo       | No      | 30  | 46.4<br>(14)   | *    | 0-0     | Fixed             | 0   | MADRS               | 30.76 |    |               |                  |                  |                                    |                     |         |         |
| Buchsbaum<br>1997                      | 1997            | 2 | 2 | sertraline    | Yes     | 7   | 38.5<br>(12.3) | 0.59 | *       | Other/U<br>nclear | *   | HAMD 24             | 32.00 | 10 | DSM-<br>III-R | North<br>America | Unclear          | Secondary<br>/Tertiary<br>care     | Unclear             | Yes     | Unclear |
|                                        |                 |   |   | placebo       | No      | 10  | 38.5<br>(12.3) | 0.59 | 0-0     | Other/U<br>nclear | 0   | HAMD 24             | 29.45 |    |               |                  |                  |                                    |                     |         |         |
| Bueno 1997                             | 1997            | 2 | 2 | nefazodone    | Unclear | 19  | 46.7<br>(10.5) | 0.79 | 200-500 | Flexible          | *   | HAMD<br>unspecified | *     | 8  | DSM-<br>III-R | South<br>America | Unclear          | Unclear                            | Outpatients<br>only | Yes     | Unclear |
|                                        |                 |   |   | amitriptyline | Unclear | 18  | 45.2<br>(12.2) | 0.89 | 50-125  | Flexible          | *   | HAMD<br>unspecified | *     |    |               |                  |                  |                                    |                     |         |         |
| Burke 2002<br>(SCT-MD-01)              | 2002            | 4 | 4 | escitalopram  | Yes     | 124 | 40.6<br>(12.3) | *    | 10-10   | Fixed             | 10  | HAMD<br>unspecified | 24.30 | 8  | DSM-IV        | North<br>America | Multi-<br>center | Unclear                            | Outpatients<br>only | Yes     | Unclear |
|                                        |                 |   |   | escitalopram  | Yes     | 128 | 39.6<br>(12.1) | *    | 20-20   | Fixed             | 20  | HAMD<br>unspecified | 25.80 |    |               |                  |                  |                                    |                     |         |         |
|                                        |                 |   |   | citalopram    | Yes     | 127 | 40<br>(11.5)   | *    | 40-40   | Fixed             | 40  | HAMD<br>unspecified | 25.90 |    |               |                  |                  |                                    |                     |         |         |
|                                        |                 |   |   | placebo       | No      | 127 | 40.3<br>(10.6) | *    | 0-0     | Fixed             | 0   | HAMD<br>unspecified | 25.80 |    |               |                  |                  |                                    |                     |         |         |
| Byerley 1988                           | 1988            | 2 | 3 | placebo       | No      | 29  | 37.5<br>(9.1)  | *    | 0-0     | Flexible          | 0   | HAMD 21             | 27.40 | 6  | DSM-III       | North<br>America | Multi-<br>center | Secondary<br>/Tertiary<br>care     | Outpatients<br>only | Yes     | Yes     |
|                                        |                 |   |   | fluoxetine    | Yes     | 32  | 38.9<br>(10.7) | *    | 40-80   | Flexible          | *   | HAMD 21             | 27.10 |    |               |                  |                  |                                    |                     |         |         |
| CAGO178A230<br>3<br>(NCT00463242)      | unpublis<br>hed | 3 | 3 | agomelatine   | Yes     | 169 | 42.1<br>(13.1) | 0.62 | 25-50   | Flexible          | *   | HAMD 17             | 27.20 | 8  | DSM-IV        | North<br>America | Multi-<br>center | Unclear                            | Unclear             | Unclear | Unclear |
|                                        |                 |   |   | paroxetine    | No      | 168 | 43.7<br>(12.7) | 0.59 | 20-40   | Flexible          | *   | HAMD 17             | 27.00 |    |               |                  |                  |                                    |                     |         |         |
|                                        |                 |   |   | placebo       | No      | 166 | 42.9<br>(11.8) | 0.67 | 0-0     | Flexible          | 0   | HAMD 17             | 26.90 |    |               |                  |                  |                                    |                     |         |         |
| Caligiuri 2003                         | 2003            | 2 | 3 | bupropion     | No      | 7   | 42<br>(9.8)    | *    | *       | Flexible          | 400 | HAMD 17             | 18.40 | 9  | DSM-IV        | North<br>America | Single<br>center | Secondary<br>/Tertiary<br>care     | Outpatients<br>only | Unclear | Unclear |
|                                        |                 |   |   | sertraline    | No      | 9   | 42<br>(9.8)    | *    | 50-*    | Flexible          | 165 | HAMD 17             | 18.40 | 8  |               |                  |                  |                                    |                     |         |         |

|                            |      |   |   |               |         |     |              |      |         |          |     |                  |       |    |                       |                   |              |                         |                  |         |         |  |
|----------------------------|------|---|---|---------------|---------|-----|--------------|------|---------|----------|-----|------------------|-------|----|-----------------------|-------------------|--------------|-------------------------|------------------|---------|---------|--|
| Carman 1991                | 1991 | 2 | 3 | amitriptyline | No      | 50  | *            | *    | 60-300  | Flexible | *   | HAMD 17          | 27.6  | 6  | DSM-III               | North America     | Unclear      | Unclear                 | Outpatients only | Yes     | Unclear |  |
|                            |      |   |   | placebo       | No      | 50  | *            | *    | 0-0     | Flexible | 0   | HAMD 17          | 26.7  |    |                       |                   |              |                         |                  |         |         |  |
| Casabona 2002 (0600B 428)  | 2002 | 2 | 2 | paroxetine    | No      | 56  | *            | *    | 20-20   | Fixed    | 20  | *                | *     | 8  | DSM-IV                | Europe            | Multi-center | Unclear                 | Outpatients only | Unclear | Unclear |  |
|                            |      |   |   | venlafaxine   | Yes     | 58  | *            | *    | 75-75   | Fixed    | 75  | *                | *     |    |                       |                   |              |                         |                  |         |         |  |
| Cassano 1986               | 1986 | 2 | 3 | fluvoxamine   | Yes     | 161 | 42.7 (13.7)  | *    | 50-300  | Flexible | 145 | HAMD 17          | 25.61 | 4  | DSM-III               | Cross-Continental | Multi-center | Unclear                 | Both             | Yes     | Yes     |  |
|                            |      |   |   | placebo       | No      | 149 | 42.1 (11.8)  | *    | 0-0     | Flexible | 0   | HAMD 17          | 25.60 |    |                       |                   |              |                         |                  |         |         |  |
| Cassano 2002 (29060/421)   | 2002 | 2 | 2 | paroxetine    | Yes     | 123 | 75.61 (6.99) | *    | 20-40   | Flexible | *   | HAMD unspecified | 22.95 | 6  | ICD-10                | Europe            | Multi-center | Unclear                 | Outpatients only | Yes     | Unclear |  |
|                            |      |   |   | fluoxetine    | No      | 119 | 74.85 (6.67) | *    | 20-60   | Flexible | *   | HAMD unspecified | 23.41 |    |                       |                   |              |                         |                  |         |         |  |
| Chang 2015                 | 2015 | 2 | 2 | fluoxetine    | No      | 58  | 41.7 (12)    | 0.76 | 20-80   | Flexible | 21  | HAMD 21          | 24.30 | 6  | DSM-IV                | Asia              | Unclear      | Other/Unclear           | Outpatients only | Unclear | Yes     |  |
|                            |      |   |   | venlafaxine   | No      | 54  | 37.5 (12.5)  | 0.70 | 75-225  | Flexible | 80  | HAMD 21          | 25.90 |    |                       |                   |              |                         |                  |         |         |  |
| Chouinard 1983a            | 1983 | 2 | 2 | amitriptyline | Unclear | 41  | 35.1 (*)     | *    | 75-150  | Flexible | 119 | HAMD 21          | 26.10 | 13 | Other operationalized | North America     | Multi-center | Unclear                 | Outpatients only | Yes     | Yes     |  |
|                            |      |   |   | bupropion     | Unclear | 77  | 38.9 (*)     | *    | 300-450 | Flexible | 374 | HAMD 21          | 26.50 |    |                       |                   |              |                         |                  |         |         |  |
| Chouinard 1985             | 1985 | 2 | 2 | fluoxetine    | Unclear | 25  | 41 (*)       | *    | 40-80   | Flexible | 69  | HAMD 21          | 27.60 | 5  | RDC                   | North America     | Multi-center | Secondary/Tertiary care | Outpatients only | Yes     | Yes     |  |
|                            |      |   |   | amitriptyline | Unclear | 28  | 39 (*)       | *    | 150-300 | Flexible | 163 | HAMD 21          | 25.90 |    |                       |                   |              |                         |                  |         |         |  |
| Chouinard 1999 (29060/131) | 1999 | 2 | 2 | paroxetine    | Yes     | 102 | 40.6 (10.7)  | *    | 20-50   | Flexible | 26  | HAMD 21          | 25.91 | 12 | DSM-III-R             | North America     | Multi-center | Unclear                 | Unclear          | Yes     | Unclear |  |
|                            |      |   |   | fluoxetine    | No      | 101 | 41.2 (10.7)  | *    | 20-80   | Flexible | 28  | HAMD 21          | 25.45 |    |                       |                   |              |                         |                  |         |         |  |
| Christiansen 1996          | 1996 | 2 | 2 | paroxetine    | Unclear | 71  | *            | *    | 20-40   | Flexible | *   | HAMD 17          | 23.8  | 8  | *                     | Europe            | Multi-center | Unclear                 | Outpatients only | Unclear | Unclear |  |
|                            |      |   |   | amitriptyline | Unclear | 73  | *            | *    | 100-150 | Flexible | *   | HAMD 17          | 24.2  |    |                       |                   |              |                         |                  |         |         |  |
| CL3-20098-022              | 2001 | 3 | 3 | agomelatine   | Yes     | 133 | 41 (9.7)     | 0.67 | 25-25   | Fixed    | 25  | HAMD 17          | 27.60 | 24 | DSM-IV                | Europe            | Multi-center | Secondary/Tertiary care | Both             | Yes     | No      |  |
|                            |      |   |   | fluoxetine    | no      | 137 | 42.9 (11.3)  | 0.67 | 20-20   | Fixed    | 20  | HAMD 17          | 27.50 |    |                       |                   |              |                         |                  |         |         |  |
|                            |      |   |   | placebo       | No      | 149 | 43 (9.5)     | 0.67 | 0-0     | Fixed    | 0   | HAMD 17          | 28.00 |    |                       |                   |              |                         |                  |         |         |  |
| CL3-20098-023              | 2001 | 3 | 3 | agomelatine   | Yes     | 142 | 40.6 (10.8)  | 0.75 | 25-25   | Fixed    | 25  | HAMD 17          | 25.70 | 24 | DSM-IV                | Cross-Continental | Multi-center | Secondary/Tertiary care | Both             | No      | No      |  |
|                            |      |   |   | paroxetine    | No      | 138 | 40.9 (11)    | 0.75 | 20-20   | Fixed    | 20  | HAMD 17          | 26.10 |    |                       |                   |              |                         |                  |         |         |  |
|                            |      |   |   | placebo       | No      | 137 | 41.2 (10.1)  | 0.75 | 0-0     | Fixed    | 0   | HAMD 17          | 26.00 |    |                       |                   |              |                         |                  |         |         |  |



|                                         |      |   |   |               |         |     |                |      |         |          |     |         |       |    |           |                   |               |                         |                  |         |         |  |  |
|-----------------------------------------|------|---|---|---------------|---------|-----|----------------|------|---------|----------|-----|---------|-------|----|-----------|-------------------|---------------|-------------------------|------------------|---------|---------|--|--|
| CL3-20098-024                           | 2002 | 3 | 4 | agomelatine   | Yes     | 301 | 40.4<br>(11.1) | 0.73 | 25-50   | Fixed    | 38  | HAMD 17 | 26.40 | 24 | DSM-IV    | Cross-Continental | Multi-center  | Secondary/Tertiary care | Both             | No      | Unclear |  |  |
|                                         |      |   |   | fluoxetine    | No      | 148 | 41.3<br>(10)   | 0.73 | 20-20   | Fixed    | 20  | HAMD 17 | 26.50 |    |           |                   |               |                         |                  |         |         |  |  |
|                                         |      |   |   | placebo       | No      | 158 | 41.6<br>(11.2) | 0.73 | 0-0     | Fixed    | 0   | HAMD 17 | 26.90 |    |           |                   |               |                         |                  |         |         |  |  |
| CL3-20098-026                           | 2001 | 2 | 2 | agomelatine   | Yes     | 109 | 66.8<br>(5.3)  | *    | 25-25   | Fixed    | 25  | HAMD 17 | 23.40 | 24 | DSM-IV    | Cross-Continental | Multi-center  | Secondary/Tertiary care | Both             | No      | No      |  |  |
|                                         |      |   |   | placebo       | No      | 109 | 67.8<br>(5.1)  | *    | 0-0     | Fixed    | 0   | HAMD 17 | 23.00 |    |           |                   |               |                         |                  |         |         |  |  |
| CL3-20098-036                           | 2004 | 2 | 2 | agomelatine   | Yes     | 137 | 39.6<br>(10.3) | 0.72 | 50-50   | Fixed    | 50  | MADRS   | 27.90 | 24 | DSM-IV    | Cross-Continental | Multi-center  | Primary care            | Outpatients only | No      | No      |  |  |
|                                         |      |   |   | venlafaxine   | No      | 140 | 42.1<br>(10)   | 0.72 | 75-150  | Flexible | *   | MADRS   | 27.90 |    |           |                   |               |                         |                  |         |         |  |  |
| CL3-20098-048                           | 2008 | 2 | 2 | agomelatine   | Yes     | 213 | 68.6<br>(6.2)  | *    | 25-50   | Flexible | *   | HAMD 17 | 26.30 | 24 | DSM-IV    | Cross-Continental | Multi-center  | Primary care            | Outpatients only | No      | No      |  |  |
|                                         |      |   |   | paroxetine    | No      | 199 | 68.3<br>(6.2)  | *    | 20-30   | Flexible | *   | HAMD 17 | 26.20 |    |           |                   |               |                         |                  |         |         |  |  |
| CL3-20098-062                           | 2010 | 2 | 2 | agomelatine   | Yes     | 202 | 43<br>(12.3)   | *    | 25-50   | Flexible | *   | HAMD 17 | 26.20 | 25 | DSM-IV    | Cross-Continental | Multi-center  | Primary care            | Outpatients only | No      | No      |  |  |
|                                         |      |   |   | duloxetine    | No      | 216 | 42.5<br>(11.9) | *    | 60-60   | Fixed    | 60  | HAMD 17 | 26.30 |    |           |                   |               |                         |                  |         |         |  |  |
| CL3-20098-070                           | 2011 | 2 | 2 | agomelatine   | Yes     | 151 | 71.9<br>(5.1)  | *    | 25-50   | Flexible | *   | HAMD 17 | 26.80 | 24 | DSM-IV    | Cross-Continental | Multi-center  | Primary care            | Outpatients only | No      | No      |  |  |
|                                         |      |   |   | placebo       | No      | 71  | 71.7<br>(4.8)  | *    | 0-0     | Flexible | 0   | HAMD 17 | 26.70 |    |           |                   |               |                         |                  |         |         |  |  |
| Claghorn 1983                           | 1983 | 2 | 3 | amitriptyline | No      | 85  | 39<br>(12.7)   | *    | 75-300  | Flexible | 180 | HAMD 21 | 26.51 | 4  | RDC       | North America     | Multi-center  | Secondary/Tertiary care | Outpatients only | Yes     | Yes     |  |  |
|                                         |      |   |   | placebo       | No      | 87  | 39.1<br>(12.5) | *    | 0-0     | Flexible | 0   | HAMD 21 | 27.11 |    |           |                   |               |                         |                  |         |         |  |  |
| Claghorn 1995<br>(MIR 003-002<br>(FDA)) | 1995 | 2 | 2 | mirtazapine   | Yes     | 45  | 39 (*)         | *    | *-35    | Flexible | 17  | HAMD 21 | 24.20 | 6  | DSM-III   | North America     | Single center | Secondary/Tertiary care | Outpatients only | Yes     | Yes     |  |  |
|                                         |      |   |   | placebo       | No      | 45  | 40 (*)         | *    | 0-0     | Flexible | 0   | HAMD 21 | 24.70 |    |           |                   |               |                         |                  |         |         |  |  |
| Claghorn 1996                           | 1996 | 2 | 3 | fluvoxamine   | Yes     | 50  | 39<br>(10.9)   | *    | 50-150  | Flexible | 93  | HAMD 21 | 26.09 | 6  | DSM-III-R | North America     | Single center | Unclear                 | Outpatients only | Yes     | Unclear |  |  |
|                                         |      |   |   | placebo       | No      | 50  | 39<br>(10.9)   | *    | 0-0     | Flexible | 0   | HAMD 21 | 26.42 | 7  |           |                   |               |                         |                  |         |         |  |  |
| Clayton 2003<br>(Study 050)             | 2003 | 3 | 3 | reboxetine    | Yes     | 150 | 39.8<br>(11.4) | 0.63 | 8-10    | Flexible | 10  | HAMD 21 | 25.60 | 8  | DSM-IV    | North America     | Multi-center  | Unclear                 | Outpatients only | Yes     | Yes     |  |  |
|                                         |      |   |   | placebo       | No      | 150 | 39.8<br>(11.1) | 0.60 | 0-0     | Flexible | 0   | HAMD 21 | 25.50 |    |           |                   |               |                         |                  |         |         |  |  |
|                                         |      |   |   | fluoxetine    | No      | 150 | 40.7<br>(10.6) | 0.66 | 20-40   | Flexible | 36  | HAMD 21 | 26.00 |    |           |                   |               |                         |                  |         |         |  |  |
| Clayton 2006a<br>(WELL<br>AK130926)     | 2006 | 3 | 3 | bupropion     | Yes     | 138 | 37<br>(12.5)   | *    | 300-450 | Flexible | 309 | HAMD 17 | *     | 8  | DSM-IV    | North America     | Multi-center  | Unclear                 | Outpatients only | Unclear | Yes     |  |  |
|                                         |      |   |   | escitalopram  | Unclear | 149 | 35.7<br>(12.1) | *    | 10-20   | Flexible | 13  | HAMD 17 | *     |    |           |                   |               |                         |                  |         |         |  |  |
|                                         |      |   |   | placebo       | No      | 137 | 37<br>(10.7)   | *    | 0-0     | Flexible | 0   | HAMD 17 | *     |    |           |                   |               |                         |                  |         |         |  |  |

|                                     |                 |   |   |                    |         |     |                |      |         |                   |     |                     |       |   |               |                  |                  |                                |                     |         |         |  |  |
|-------------------------------------|-----------------|---|---|--------------------|---------|-----|----------------|------|---------|-------------------|-----|---------------------|-------|---|---------------|------------------|------------------|--------------------------------|---------------------|---------|---------|--|--|
| Clayton 2006b<br>(WELL<br>AK130927) | 2006            | 3 | 3 | escitalopram       | Unclear | 138 | 35.4<br>(10.4) | *    | 10-20   | Flexible          | 13  | HAMD 17             | 23.80 | 8 | DSM-IV        | North<br>America | Multi-<br>center | Unclear                        | Outpatients<br>only | Unclear | Yes     |  |  |
|                                     |                 |   |   | bupropion          | Yes     | 141 | 36.5<br>(12.2) | *    | 300-450 | Flexible          | 323 | HAMD 17             | 24.50 |   |               |                  |                  |                                |                     |         |         |  |  |
|                                     |                 |   |   | placebo            | No      | 141 | 35.1<br>(11.8) | *    | 0-0     | Flexible          | 0   | HAMD 17             | 24.40 |   |               |                  |                  |                                |                     |         |         |  |  |
| Clayton 2013<br>(NCT01121484)       | 2013            | 2 | 2 | desvenlafaxi<br>ne | Yes     | 218 | 53.2<br>(6.8)  | 1.00 | 50-50   | Fixed             | 50  | HAMD 17             | 22.8  | 8 | DSM-IV        | North<br>America | Multi-<br>center | Secondary<br>/Tertiary<br>care | Outpatients<br>only | No      | Yes     |  |  |
|                                     |                 |   |   | placebo            | No      | 221 | 52.8<br>(6.6)  | 1.00 | 0-0     | Fixed             | 0   | HAMD 17             | 22.4  |   |               |                  |                  |                                |                     |         |         |  |  |
| Clayton 2015                        | 2015            | 3 | 3 | placebo            | No      | 306 | 41.7<br>(12.4) | 0.58 | 0-0     | Fixed             | 0   | HAMD 17             | 23.6  | 8 | DSM-IV        | North<br>America | Multi-<br>center | Unclear                        | Outpatients<br>only | Unclear | Unclear |  |  |
|                                     |                 |   |   | desvenlafaxi<br>ne | Yes     | 306 | 41.8<br>(13.6) | 0.57 | 50-50   | Fixed             | 50  | HAMD 17             | 23.4  |   |               |                  |                  |                                |                     |         |         |  |  |
|                                     |                 |   |   | desvenlafaxi<br>ne | Yes     | 312 | 41.3<br>(12.8) | 0.53 | 100-100 | Fixed             | 100 | HAMD 17             | 23.5  |   |               |                  |                  |                                |                     |         |         |  |  |
| Clerc 1994                          | 1994            | 2 | 2 | fluoxetine         | No      | 34  | 53.6<br>(*)    | *    | 40-40   | Fixed             | 40  | HAMD 21             | 29.70 | 6 | DSM-<br>III-R | Europe           | Multi-<br>center | Secondary<br>/Tertiary<br>care | Inpatients<br>only  | Yes     | Unclear |  |  |
|                                     |                 |   |   | venlafaxine        | Yes     | 34  | 49 (*)         | *    | 200-200 | Fixed             | 200 | HAMD 21             | 29.10 |   |               |                  |                  |                                |                     |         |         |  |  |
| Clerc 2001                          | 2001            | 2 | 2 | fluvoxamine        | No      | 56  | 52.2<br>(12.6) | *    | 200-200 | Fixed             | 200 | HAMD 24             | 31.40 | 6 | DSM-<br>III-R | Europe           | Multi-<br>center | Secondary<br>/Tertiary<br>care | Both                | Yes     | Yes     |  |  |
|                                     |                 |   |   | milnacipran        | Yes     | 57  | 48.7<br>(15.1) | *    | 100-100 | Fixed             | 100 | HAMD 24             | 32.80 |   |               |                  |                  |                                |                     |         |         |  |  |
| CN104-002<br>(FDA)                  | unpublis<br>hed | 2 | 3 | nefazodone         | Yes     | 60  | 38.2<br>(*)    | 0.57 | 50-300  | Flexible          | 263 | HAMD 17             | 23.30 | 6 | DSM-<br>III-R | North<br>America | Multi-<br>center | Secondary<br>/Tertiary<br>care | Outpatients<br>only | Unclear | Yes     |  |  |
|                                     |                 |   |   | placebo            | No      | 60  | 38.6<br>(*)    | 0.65 | 0-0     | Flexible          | 0   | HAMD 17             | 23.10 |   |               |                  |                  |                                |                     |         |         |  |  |
| CN104-045<br>(FDA)                  | unpublis<br>hed | 2 | 2 | nefazodone         | Yes     | *   | *              | 0.63 | 100-400 | Other/U<br>nclear | *   | *                   | *     | 6 | Unclear       | North<br>America | Multi-<br>center | Unclear                        | Outpatients         | Unclear | Unclear |  |  |
|                                     |                 |   |   | placebo            | No      | *   | *              | 0.63 | 0-0     | Other/U<br>nclear | 0   | *                   | *     |   |               |                  |                  |                                |                     |         |         |  |  |
| CN104-054<br>(FDA)                  | unpublis<br>hed | 3 | 3 | nefazodone         | Yes     | *   | *              | 0.68 | 100-600 | Fixed             | *   | *                   | *     | 8 | Unclear       | North<br>America | Multi-<br>center | Unclear                        | Outpatients         | Unclear | Unclear |  |  |
|                                     |                 |   |   | fluoxetine         | No      | *   | *              | 0.68 | 20-20   | Fixed             | 20  | *                   | *     |   |               |                  |                  |                                |                     |         |         |  |  |
|                                     |                 |   |   | placebo            | No      | *   | *              | 0.68 | 0-0     | Fixed             | 0   | *                   | *     |   |               |                  |                  |                                |                     |         |         |  |  |
| Cohn 1985a                          | 1985            | 2 | 3 | fluoxetine         | Yes     | 54  | 41 (*)         | 0.72 | 20-80   | Flexible          | *   | HAMD<br>unspecified | 25.75 | 6 | DSM-III       | North<br>America | Single<br>center | Unclear                        | Outpatients<br>only | Yes     | Unclear |  |  |
|                                     |                 |   |   | placebo            | No      | 58  | 44 (*)         | 0.48 | 0-0     | Flexible          | 0   | HAMD<br>unspecified | 25.14 |   |               |                  |                  |                                |                     |         |         |  |  |
| Cohn 1990                           | 1990            | 2 | 2 | sertraline         | Unclear | 161 | 70.2<br>(*)    | 0.50 | 50-200  | Flexible          | 116 | HAMD 17             | 23.7  | 8 | DSM-III       | North<br>America | Multi-<br>center | Secondary<br>/Tertiary<br>care | Outpatients<br>only | Yes     | Yes     |  |  |
|                                     |                 |   |   | amitriptyline      | No      | 80  | 70.6<br>(*)    | 0.46 | 50-150  | Flexible          | 88  | HAMD 17             | 25.2  |   |               |                  |                  |                                |                     |         |         |  |  |
| Cohn 1996<br>(FDA CN104-<br>006-2)  | 1996            | 2 | 3 | nefazodone         | Yes     | 43  | 39.4<br>(13.1) | 0.77 | 200-600 | Flexible          | 321 | HAMD 17             | 22.80 | 8 | DSM-<br>III-R | North<br>America | Single<br>center | Unclear                        | Outpatients<br>only | Unclear | No      |  |  |
|                                     |                 |   |   | placebo            | No      | 43  | 38.8<br>(12.5) | 0.64 | 0-0     | Flexible          | 0   | HAMD 17             | 23.40 |   |               |                  |                  |                                |                     |         |         |  |  |

|                                       |      |   |   |              |     |     |                |      |         |          |     |         |       |    |           |                   |              |                         |                  |         |         |  |  |
|---------------------------------------|------|---|---|--------------|-----|-----|----------------|------|---------|----------|-----|---------|-------|----|-----------|-------------------|--------------|-------------------------|------------------|---------|---------|--|--|
| Coleman 1999<br>(AK1A4002)            | 1999 | 3 | 3 | sertraline   | No  | 118 | 38.3<br>(11.7) | *    | 50-200  | Flexible | 106 | HAMD 31 | 34.80 | 8  | DSM-IV    | North America     | Multi-center | Secondary/Tertiary care | Outpatients only | Unclear | No      |  |  |
|                                       |      |   |   | placebo      | No  | 124 | 38.5<br>(10.6) | *    | 0-0     | Flexible | 0   | HAMD 31 | 34.00 |    |           |                   |              |                         |                  |         |         |  |  |
|                                       |      |   |   | bupropion    | Yes | 122 | 38.1<br>(10.4) | *    | 150-400 | Flexible | 290 | HAMD 31 | 34.50 |    |           |                   |              |                         |                  |         |         |  |  |
| Coleman 2001<br>(AK1A4007)            | 2001 | 3 | 3 | fluoxetine   | No  | 154 | 37.1<br>(10.6) | *    | 20-60   | Flexible | 26  | HAMD 21 | 24.50 | 8  | DSM-IV    | North America     | Multi-center | Unclear                 | Outpatients only | No      | Unclear |  |  |
|                                       |      |   |   | bupropion    | Yes | 150 | 36.6<br>(10.5) | *    | 150-400 | Flexible | 319 | HAMD 21 | 24.60 |    |           |                   |              |                         |                  |         |         |  |  |
|                                       |      |   |   | placebo      | No  | 152 | 36.7<br>(10.7) | *    | 0-0     | Flexible | 0   | HAMD 21 | 24.40 |    |           |                   |              |                         |                  |         |         |  |  |
| Colonna 2005<br>(Study 99022)         | 2005 | 2 | 2 | escitalopram | Yes | 175 | 46<br>(12)     | *    | 10-10   | Fixed    | 10  | MADRS   | 29.50 | 8  | DSM-IV    | Europe            | Multi-center | Primary care            | Outpatients only | Yes     | Unclear |  |  |
|                                       |      |   |   | citalopram   | No  | 182 | 46<br>(11)     | *    | 20-20   | Fixed    | 20  | MADRS   | 30.20 |    |           |                   |              |                         |                  |         |         |  |  |
| Corrigan 2000                         | 2000 | 2 | 5 | fluoxetine   | No  | 35  | 42 (*)         | *    | 20-20   | Fixed    | 20  | HAMD 17 | 22.00 | 8  | DSM-III-R | North America     | Multi-center | Secondary/Tertiary care | Unclear          | Yes     | Unclear |  |  |
|                                       |      |   |   | placebo      | No  | 35  | 42 (*)         | *    | 0-0     | Fixed    | 0   | HAMD 17 | 20.80 |    |           |                   |              |                         |                  |         |         |  |  |
| Corruble 2013<br>(CL3-20098-063)      | 2008 | 2 | 2 | agomelatine  | Yes | 164 | 43.6<br>(12.9) | 0.73 | 25-50   | Flexible | *   | HAMD 17 | 26.80 | 25 | DSM-IV    | Cross-Continental | Multi-center | Primary care            | Outpatients only | No      | No      |  |  |
|                                       |      |   |   | escitalopram | No  | 160 | 42.8<br>(11.8) | 0.69 | 10-20   | Flexible | *   | HAMD 17 | 26.60 |    |           |                   |              |                         |                  |         |         |  |  |
| Costaesilva 1998                      | 1998 | 2 | 2 | fluoxetine   | No  | 186 | 39.8<br>(10.3) | *    | 20-40   | Flexible | *   | HAMD 17 | 29.70 | 8  | DSM-III-R | South America     | Multi-center | Unclear                 | Outpatients only | No      | Unclear |  |  |
|                                       |      |   |   | venlafaxine  | Yes | 196 | 40.5<br>(10.7) | *    | 75-150  | Flexible | *   | HAMD 17 | 30.40 |    |           |                   |              |                         |                  |         |         |  |  |
| Croft 1999<br>(AK1A4001)              | 1999 | 3 | 3 | sertraline   | No  | 119 | 36<br>(9.8)    | *    | 50-200  | Flexible | 121 | HAMD 29 | 33.10 | 8  | DSM-IV    | North America     | Multi-center | Unclear                 | Unclear          | No      | No      |  |  |
|                                       |      |   |   | bupropion    | Yes | 120 | 35.9<br>(10.8) | *    | 150-400 | Flexible | 293 | HAMD 29 | 32.90 |    |           |                   |              |                         |                  |         |         |  |  |
|                                       |      |   |   | placebo      | No  | 121 | 37.4<br>(10.9) | *    | 0-0     | Flexible | 0   | HAMD 29 | 32.20 |    |           |                   |              |                         |                  |         |         |  |  |
| Croft 2014<br>(NCT01473394)           | 2014 | 2 | 2 | vilazodone   | Yes | 260 | 39.3<br>(12.8) | 0.51 | 40-40   | Fixed    | 40  | MADRS   | 30.60 | 8  | DSM-IV    | North America     | Multi-center | Unclear                 | Outpatients only | No      | Yes     |  |  |
|                                       |      |   |   | placebo      | No  | 258 | 41.1<br>(13.2) | 0.56 | 0-0     | Fixed    | 0   | MADRS   | 30.90 |    |           |                   |              |                         |                  |         |         |  |  |
| Cunningham 1994<br>(VEN 600A-302 FDA) | 1994 | 3 | 3 | venlafaxine  | Yes | 76  | 42 (*)         | 0.63 | 75-200  | Flexible | 160 | HAMD 21 | 25.02 | 6  | DSM-III-R | North America     | Multi-center | Unclear                 | Outpatients only | Yes     | Yes     |  |  |
|                                       |      |   |   | trazodone    | No  | 77  | 39 (*)         | 0.69 | 150-400 | Flexible | 300 | HAMD 21 | 24.66 |    |           |                   |              |                         |                  |         |         |  |  |
|                                       |      |   |   | placebo      | No  | 76  | 41 (*)         | 0.67 | 0-0     | Flexible | 0   | HAMD 21 | 24.41 |    |           |                   |              |                         |                  |         |         |  |  |
| Cunningham 1997<br>(VEN XR 208 - FDA) | 1997 | 3 | 3 | venlafaxine  | Yes | 97  | 39.7<br>(11)   | 0.63 | 75-150  | Flexible | 139 | HAMD 21 | 24.40 | 12 | DSM-III-R | North America     | Multi-center | Unclear                 | Outpatients only | Yes     | Yes     |  |  |
|                                       |      |   |   | venlafaxine  | Yes | 96  | 42.8<br>(11.4) | 0.67 | 75-150  | Flexible | 123 | HAMD 21 | 23.98 |    |           |                   |              |                         |                  |         |         |  |  |
|                                       |      |   |   | placebo      | No  | 100 | 39.9<br>(10.1) | 0.59 | 0-0     | Flexible | 0   | HAMD 21 | 24.56 |    |           |                   |              |                         |                  |         |         |  |  |

|                                                |      |   |   |                |         |     |                 |      |         |          |     |                  |       |    |           |               |               |                         |                  |         |         |  |  |
|------------------------------------------------|------|---|---|----------------|---------|-----|-----------------|------|---------|----------|-----|------------------|-------|----|-----------|---------------|---------------|-------------------------|------------------|---------|---------|--|--|
| Cutler 2009                                    | 2009 | 2 | 3 | duloxetine     | No      | 151 | 40.2<br>(12.5)  | *    | 60-60   | Fixed    | 60  | HAMD 17          | 25.20 | 8  | DSM-IV    | North America | Multi-center  | Unclear                 | Outpatients only | Unclear | Yes     |  |  |
|                                                |      |   |   | placebo        | No      | 157 | 42.3<br>(11.5)  | *    | 0-0     | Fixed    | 0   | HAMD 17          | 25.20 |    |           |               |               |                         |                  |         |         |  |  |
| Dalery 2003                                    | 2003 | 2 | 2 | fluvoxamine    | Yes     | 90  | 42 (*)          | *    | 100-100 | Fixed    | 100 | HAMD 17          | 22.30 | 6  | DSM-III-R | Europe        | Multi-center  | Secondary/Tertiary care | Outpatients only | Yes     | Yes     |  |  |
|                                                |      |   |   | fluoxetine     | No      | 94  | 42.1<br>(*)     | *    | 20-20   | Fixed    | 20  | HAMD 17          | 22.20 |    |           |               |               |                         |                  |         |         |  |  |
| D'Amico 1990<br>(FDA 030-A2-0007)              | 1990 | 3 | 5 | nefazodone     | Yes     | 47  | *               | *    | 200-200 | Fixed    | 200 | HAMD 17          | 26.10 | 6  | RDC       | North America | Multi-center  | Unclear                 | Outpatients only | Unclear | Unclear |  |  |
|                                                |      |   |   | nefazodone     | Yes     | 47  | *               | *    | 300-300 | Fixed    | 300 | HAMD 17          | 25.40 |    |           |               |               |                         |                  |         |         |  |  |
|                                                |      |   |   | placebo        | No      | 47  | *               | *    | 0-0     | Fixed    | 0   | HAMD 17          | 26.40 |    |           |               |               |                         |                  |         |         |  |  |
| Davidson 2002<br>(HDTSG)<br>(NCT00005013)      | 2002 | 2 | 3 | sertraline     | Unclear | 111 | 43.9<br>(13.9)  | 0.67 | 50-100  | Flexible | 75  | HAMD 17          | 22.50 | 8  | DSM-IV    | North America | Multi-center  | Secondary/Tertiary care | Outpatients only | Yes     | Yes     |  |  |
|                                                |      |   |   | placebo        | No      | 116 | 40.1<br>(12.2)  | 0.66 | 0-0     | Flexible | 0   | HAMD 17          | 22.70 |    |           |               |               |                         |                  |         |         |  |  |
| Debonnel 2000<br>(Blier 2009,<br>iQWIG E-1639) | 2009 | 2 | 3 | mirtazapine    | Yes     | 21  | 45.9<br>(9.1)   | 0.29 | 30-45   | Flexible | *   | HAMD 17          | 24.00 | 6  | DSM-IV    | North America | Single center | Unclear                 | Unclear          | Yes     | Yes     |  |  |
|                                                |      |   |   | paroxetine     | No      | 21  | 39.7<br>(11.8)  | 0.48 | 20-30   | Flexible | *   | HAMD 17          | 24.20 |    |           |               |               |                         |                  |         |         |  |  |
| Debus 1988                                     | 1988 | 2 | 2 | fluoxetine     | Yes     | 22  | 35.4<br>(8.6)   | *    | 20-60   | Flexible | 31  | HAMD 21          | 23.40 | 6  | DSM-III   | North America | Multi-center  | Both                    | Outpatients only | Yes     | No      |  |  |
|                                                |      |   |   | trazodone      | No      | 21  | 39.3<br>(8.3)   | *    | 50-400  | Flexible | 305 | HAMD 21          | 25.20 |    |           |               |               |                         |                  |         |         |  |  |
| DeMartinis 2007 (Study 306,<br>NCT00072774)    | 2007 | 2 | 4 | placebo        | No      | 120 | 40<br>(12.8)    | 0.68 | 0-0     | Fixed    | 0   | HAMD 17          | 23.1  | 8  | DSM-IV    | North America | Multi-center  | Unclear                 | Outpatients only | Unclear | Unclear |  |  |
|                                                |      |   |   | desvenlafaxine | Yes     | 118 | 40.4<br>(12.1)  | 0.65 | 100-100 | Fixed    | 100 | HAMD 17          | 23.2  |    |           |               |               |                         |                  |         |         |  |  |
| Demyttenaere 1998                              | 1998 | 2 | 2 | amitriptyline  | No      | 31  | 42.1<br>(8.1)   | *    | 150-150 | Fixed    | 150 | HAMD unspecified | 23.90 | 9  | DSM-III-R | Europe        | Multi-center  | Secondary/Tertiary care | Outpatients only | Unclear | Unclear |  |  |
|                                                |      |   |   | fluoxetine     | Yes     | 35  | 41.4<br>(8.9)   | *    | 20-20   | Fixed    | 20  | HAMD unspecified | 24.90 |    |           |               |               |                         |                  |         |         |  |  |
| DeRonchi 1998                                  | 1988 | 2 | 2 | fluoxetine     | Unclear | 32  | 69.1<br>(5.92)  | *    | 20-20   | Fixed    | 20  | HAMD 17          | 25.60 | 10 | DSM-III-R | Europe        | Multi-center  | Secondary/Tertiary care | Outpatients only | Yes     | Yes     |  |  |
|                                                |      |   |   | amitriptyline  | Unclear | 33  | 68.6<br>(7.64)  | *    | 50-100  | Fixed    | 100 | HAMD 17          | 26.50 |    |           |               |               |                         |                  |         |         |  |  |
| Detke 2002a<br>(HMBH - Study Group A)          | 2002 | 2 | 2 | duloxetine     | Yes     | 123 | 42.44<br>(13.7) | *    | 60-60   | Fixed    | 60  | HAMD 17          | 21.50 | 8  | DSM-IV    | North America | Multi-center  | Unclear                 | Outpatients only | Yes     | Unclear |  |  |
|                                                |      |   |   | placebo        | No      | 122 | 42.34<br>(12.6) | *    | 0-0     | Fixed    | 0   | HAMD 17          | 21.09 |    |           |               |               |                         |                  |         |         |  |  |
| Detke 2002b<br>(HMBH - Study Group B)          | 2002 | 2 | 2 | duloxetine     | Yes     | 128 | 40.83<br>(12.6) | *    | 60-60   | Fixed    | 60  | HAMD 17          | 20.28 | 8  | DSM-IV    | North America | Multi-center  | Unclear                 | Outpatients only | Yes     | Unclear |  |  |
|                                                |      |   |   | placebo        | No      | 139 | 41.04<br>(14.7) | *    | 0-0     | Fixed    | 0   | HAMD 17          | 20.49 |    |           |               |               |                         |                  |         |         |  |  |
| Detke 2004<br>(HMBH Study Group A)             | 2004 | 4 | 4 | duloxetine     | Yes     | 95  | 43.09<br>(11.1) | *    | 80-80   | Fixed    | 80  | HAMD 17          | 19.88 | 8  | DSM-IV    | Unspecified   | Multi-center  | Unclear                 | Outpatients only | Yes     | Unclear |  |  |
|                                                |      |   |   | duloxetine     | Yes     | 93  | 44.72<br>(10.7) | *    | 120-120 | Fixed    | 120 | HAMD 17          | 20.17 |    |           |               |               |                         |                  |         |         |  |  |

|                                                                                           |      |   |   |               |         |     |                 |      |         |          |     |                     |       |    |           |                       |                  |                                |                     |         |         |
|-------------------------------------------------------------------------------------------|------|---|---|---------------|---------|-----|-----------------|------|---------|----------|-----|---------------------|-------|----|-----------|-----------------------|------------------|--------------------------------|---------------------|---------|---------|
|                                                                                           |      |   |   | paroxetine    | No      | 86  | 42<br>(10.6)    | *    | 20-20   | Fixed    | 20  | HAMD 17             | 20.26 |    |           |                       |                  |                                |                     |         |         |
|                                                                                           |      |   |   | placebo       | No      | 93  | 43.67<br>(12.2) | *    | 0-0     | Fixed    | 0   | HAMD 17             | 19.86 |    |           |                       |                  |                                |                     |         |         |
| Deushle 2003<br>(NCT01049347)                                                             | 2003 | 2 | 2 | amitriptyline | No      | 14  | 49.5<br>(17.5)  | 0.64 | 150-150 | Fixed    | 150 | HAMD<br>unspecified | 21.64 | 5  | DSM-IV    | Europe                | Unclear          | Unclear                        | Inpatients<br>only  | Unclear | Yes     |
|                                                                                           |      |   |   | paroxetine    | No      | 21  | 61.2<br>(13)    | 0.67 | 40-40   | Fixed    | 40  | HAMD<br>unspecified | 23.62 |    |           |                       |                  |                                |                     |         |         |
| DeWilde 1983a                                                                             | 1983 | 2 | 2 | fluvoxamine   | Yes     | 22  | *               | *    | 100-300 | Flexible | 300 | HAMD 17             | 23.40 | 6  | Feighner  | Europe                | Single<br>center | Secondary<br>/Tertiary<br>care | Outpatients<br>only | Unclear | Yes     |
|                                                                                           |      |   |   | clomipramine  | No      | 21  | *               | *    | 50-150  | Flexible | 144 | HAMD 17             | 24.20 |    |           |                       |                  |                                |                     |         |         |
| DeWilde 1993                                                                              | 1993 | 2 | 2 | paroxetine    | Yes     | 49  | 43.9<br>(13.2)  | *    | 20-40   | Flexible | *   | HAMD 21             | 27.00 | 6  | DSM-III   | Europe                | Multi-<br>center | Other/Unclear                  | Other/Unclear       | Yes     | Unclear |
|                                                                                           |      |   |   | fluoxetine    | No      | 50  | 44.3<br>(12)    | *    | 20-60   | Flexible | *   | HAMD 21             | 28.20 |    |           |                       |                  |                                |                     |         |         |
| Dierick 1996                                                                              | 1996 | 2 | 2 | fluoxetine    | No      | 161 | 43.2<br>(13)    | 0.64 | 20-20   | Fixed    | 20  | HAMD 17             | 26.60 | 8  | DSM-III-R | Europe                | Multi-<br>center | Unclear                        | Outpatients<br>only | Unclear | Unclear |
|                                                                                           |      |   |   | venlafaxine   | Yes     | 153 | 43.7<br>(12.5)  | 0.65 | 75-150  | Flexible | 112 | HAMD 17             | 27.00 |    |           |                       |                  |                                |                     |         |         |
| Dimidjian 2006                                                                            | 2006 | 2 | 4 | paroxetine    | No      | 100 | 39.9<br>(*)     | 0.68 | *-50    | Flexible | 32  | HAMD 17             | 20.87 | 16 | DSM-IV    | North<br>America      | Unclear          | Secondary<br>/Tertiary<br>care | Outpatients<br>only | No      | Unclear |
|                                                                                           |      |   |   | placebo       | No      | 53  | 39.9<br>(*)     | 0.72 | 0-0     | Flexible | 0   | HAMD 17             | 21.15 |    |           |                       |                  |                                |                     |         |         |
| Dominguez 1985                                                                            | 1985 | 2 | 3 | fluvoxamine   | Unclear | 35  | *               | *    | 100-300 | Flexible | *   | HAMD 17             | 20.40 | 4  | DSM-III   | North<br>America      | Single<br>center | Secondary<br>/Tertiary<br>care | Outpatients<br>only | Yes     | Unclear |
|                                                                                           |      |   |   | placebo       | No      | 31  | *               | *    | 0-0     | Flexible | 0   | HAMD 17             | 20.90 |    |           |                       |                  |                                |                     |         |         |
| Doogan 1994                                                                               | 1994 | 2 | 3 | sertraline    | Yes     | 99  | 46 (*)          | 0.71 | 50-100  | Flexible | 62  | MADRS               | 27.9  | 6  | DSM-III-R | Europe                | Multi-<br>center | Primary<br>care                | Outpatients<br>only | Yes     | Yes     |
|                                                                                           |      |   |   | placebo       | No      | 101 | 45.4<br>(*)     | 0.64 | 0-0     | Flexible | 0   | MADRS               | 27.4  |    |           |                       |                  |                                |                     |         |         |
| DUAG 1990                                                                                 | 1990 | 2 | 2 | paroxetine    | Unclear | 62  | *               | *    | 30-30   | Fixed    | 30  | HAMD 17             | 23.12 | 6  | DSM-III   | Europe                | Multi-<br>center | Secondary<br>/Tertiary<br>care | Inpatients<br>only  | Yes     | Yes     |
|                                                                                           |      |   |   | clomipramine  | Unclear | 58  | *               | *    | 150-150 | Fixed    | 150 | HAMD 17             | 23.36 |    |           |                       |                  |                                |                     |         |         |
| Dube 2010<br>(NCT00420004)                                                                | 2010 | 2 | 3 | escitalopram  | No      | 62  | 34.3<br>(9.7)   | 0.36 | 10-20   | Flexible | 15  | HAMD21              | *     | 8  | DSM-IV    | Cross-<br>Continental | Multi-<br>center | Secondary<br>/Tertiary<br>care | Outpatients<br>only | Unclear | Yes     |
|                                                                                           |      |   |   | placebo       | No      | 138 | 37.5<br>(11)    | 0.47 | 0-0     | Flexible | 0   | HAMD 21             | *     |    |           |                       |                  |                                |                     |         |         |
| Dunbar 1993a<br>(Claghorn 1992,<br>Rickels 1989,<br>Rickels 1992,<br>PAR 02-001 -<br>FDA) | 1993 | 2 | 2 | paroxetine    | Yes     | 55  | 43.4<br>(*)     | 0.69 | 20-50   | Flexible | *   | HAMD 21             | 26.80 | 6  | DSM-III   | North<br>America      | Single<br>center | Secondary<br>/Tertiary<br>care | Outpatients<br>only | Yes     | Unclear |
|                                                                                           |      |   |   | placebo       | No      | 56  | 46 (*)          | 0.59 | 0-0     | Flexible | 0   | HAMD 21             | 25.90 |    |           |                       |                  |                                |                     |         |         |
| Dunbar 1993b<br>(Claghorn 1992,                                                           | 1993 | 2 | 2 | paroxetine    | Yes     | 36  | 34.5<br>(*)     | 0.41 | 20-50   | Flexible | *   | HAMD 21             | 25.00 | 6  | DSM-III   | North<br>America      | Single<br>center | Secondary<br>/Tertiary<br>care | Outpatients<br>only | Yes     | Unclear |

|                                             |             |   |   |                |     |     |             |      |         |          |     |                  |       |    |                       |               |               |                         |                  |         |         |
|---------------------------------------------|-------------|---|---|----------------|-----|-----|-------------|------|---------|----------|-----|------------------|-------|----|-----------------------|---------------|---------------|-------------------------|------------------|---------|---------|
| PAR 02-002 - FDA)                           |             |   |   | placebo        | No  | 36  | 35.7 (*)    | 0.39 | 0-0     | Flexible | 0   | HAMD 21          | 24.60 |    |                       |               |               |                         |                  |         |         |
| Dunbar 1993c (Smith 1992, PAR 02-003 - FDA) | 1993        | 2 | 2 | paroxetine     | Yes | 39  | 44.9 (*)    | 0.46 | 20-50   | Flexible | *   | HAMD 21          | 28.60 | 6  | DSM-III               | North America | Single center | Secondary/Tertiary care | Outpatients only | Yes     | Unclear |
|                                             |             |   |   | placebo        | No  | 38  | 44.6 (*)    | 0.55 | 0-0     | Flexible | 0   | HAMD 21          | 28.90 |    |                       |               |               |                         |                  |         |         |
| Dunbar 1993d (Kiev 1992, PAR 02-004 - FDA)  | 1993        | 2 | 2 | paroxetine     | Yes | 40  | 34.9 (*)    | 0.41 | 20-50   | Flexible | *   | HAMD 21          | 28.80 | 6  | DSM-III               | North America | Single center | Secondary/Tertiary care | Outpatients only | Yes     | Unclear |
|                                             |             |   |   | placebo        | No  | 41  | 40.3 (*)    | 0.50 | 0-0     | Flexible | 0   | HAMD 21          | 27.50 |    |                       |               |               |                         |                  |         |         |
| Dunlop 2011 (NCT00824291)                   | 2011        | 2 | 2 | desvenlafaxine | Yes | 291 | 43.2 (11.7) | 0.66 | 50-50   | Fixed    | 50  | HAMD 17          | 22    | 12 | DSM-IV                | North America | Multi-center  | Secondary/Tertiary care | Outpatients only | Unclear | Yes     |
|                                             |             |   |   | placebo        | No  | 146 | 41.6 (12.6) | 0.66 | 0-0     | Fixed    | 0   | HAMD 17          | 21.8  |    |                       |               |               |                         |                  |         |         |
| Dunner 1992 (PAR 29060.09)                  | 1992        | 4 | 5 | paroxetine     | Yes | 106 | 41.6 (*)    | *    | 20-20   | Fixed    | 20  | HAMD 21          | 25.19 | 6  | DSM-III               | North America | Multi-center  | Other/Unclear           | Outpatients only | Unclear | Unclear |
|                                             |             |   |   | paroxetine     | Yes | 104 | 41.6 (*)    | *    | 30-30   | Fixed    | 30  | HAMD 21          | 25.18 |    |                       |               |               |                         |                  |         |         |
|                                             |             |   |   | paroxetine     | Yes | 106 | 41.4 (*)    | *    | 40-40   | Fixed    | 40  | HAMD 21          | 25.03 |    |                       |               |               |                         |                  |         |         |
|                                             |             |   |   | placebo        | No  | 53  | 40.9 (*)    | *    | 0-0     | Fixed    | 0   | HAMD 21          | 24.50 |    |                       |               |               |                         |                  |         |         |
| E-1569                                      | unpublished | 2 | 2 | mirtazapine    | Yes | 73  | 46.5 (12.5) | 0.68 | 30-45   | Flexible | *   | HAMD 17          | 24.60 | 6  | DSM-IV                | Europe        | Multi-center  | Other/Unclear           | Outpatients only | Yes     | Unclear |
|                                             |             |   |   | paroxetine     | No  | 75  | 43 (12.5)   | 0.69 | 20-40   | Flexible | *   | HAMD 17          | 25.70 |    |                       |               |               |                         |                  |         |         |
| Edwards 1989 (MD/PAR/009 PAR-276)           | 1989        | 2 | 2 | paroxetine     | Yes | 21  | 45.1 (*)    | 0.55 | 30-30   | Fixed    | 30  | HAMD 17          | 26.80 | 6  | DSM-III               | Europe        | Single center | Secondary/Tertiary care | Outpatients only | Unclear | Yes     |
|                                             |             |   |   | placebo        | No  | 21  | 43.3 (*)    | 0.57 | 0-0     | Fixed    | 0   | HAMD 17          | 25.50 |    |                       |               |               |                         |                  |         |         |
| Ekselius 1997                               | 1997        | 2 | 2 | citalopram     | No  | 200 | 48.1 (12)   | *    | 20-60   | Flexible | 34  | MADRS            | 28.30 | 12 | DSM-III-R             | Europe        | Multi-center  | Primary care            | Outpatients only | Yes     | No      |
|                                             |             |   |   | sertraline     | Yes | 200 | 47.3 (13.3) | *    | 50-150  | Flexible | 82  | MADRS            | 28.30 |    |                       |               |               |                         |                  |         |         |
| Faber 1995 (SER 103 FDA)                    | 1995        | 4 | 4 | sertraline     | Yes | 95  | 37 (*)      | 0.51 | 50-50   | Fixed    | 50  | HAMD17           | 24.80 | 6  | DSM-III               | North America | Multi-center  | Other/Unclear           | Outpatients only | Yes     | Yes     |
|                                             |             |   |   | sertraline     | Yes | 92  | 37 (*)      | 0.57 | 100-100 | Fixed    | 100 | HAMD 17          | 24.90 |    |                       |               |               |                         |                  |         |         |
|                                             |             |   |   | sertraline     | Yes | 91  | 38 (*)      | 0.63 | 200-200 | Fixed    | 200 | HAMD 17          | 25.70 |    |                       |               |               |                         |                  |         |         |
|                                             |             |   |   | placebo        | No  | 91  | 37 (*)      | 0.44 | 0-0     | Fixed    | 0   | HAMD 17          | 25.30 |    |                       |               |               |                         |                  |         |         |
| Fabre 1979                                  | 1979        | 2 | 3 | trazodone      | Yes | 13  | *           | *    | 200-300 | Flexible | 287 | HAMD unspecified | *     | 4  | Other operationalized | North America | Unclear       | Secondary/Tertiary care | Unclear          | Yes     | Yes     |
|                                             |             |   |   | placebo        | No  | 11  | *           | *    | 0-0     | Flexible | 0   | HAMD unspecified | *     |    |                       |               |               |                         |                  |         |         |

|                     |      |   |   |               |         |    |             |      |         |          |     |                  |       |    |                       |               |               |                         |                  |         |         |  |  |
|---------------------|------|---|---|---------------|---------|----|-------------|------|---------|----------|-----|------------------|-------|----|-----------------------|---------------|---------------|-------------------------|------------------|---------|---------|--|--|
| Fabre 1996          | 1996 | 2 | 3 | fluvoxamine   | Yes     | 50 | 45 (*)      | *    | 50-150  | Flexible | 119 | HAMD 21          | 27.70 | 6  | DSM-III-R             | North America | Single center | Secondary/Tertiary care | Outpatients only | Yes     | Yes     |  |  |
|                     |      |   |   | placebo       | No      | 50 | 41 (*)      | *    | 0-0     | Flexible | 0   | HAMD 21          | 26.00 |    |                       |               |               |                         |                  |         |         |  |  |
| Falk 1989           | 1989 | 2 | 2 | trazodone     | No      | 13 | 67.5 (4)    | *    | 50-400  | Flexible | 350 | HAMD 21          | 26.17 | 6  | DSM-III               | North America | Single center | Secondary/Tertiary care | Outpatients only | Yes     | Unclear |  |  |
|                     |      |   |   | fluoxetine    | Yes     | 14 | 69.1 (6.2)  | *    | 20-60   | Flexible | 48  | HAMD 21          | 23.77 |    |                       |               |               |                         |                  |         |         |  |  |
| Fang 1997 (Yu 1997) | 1997 | 2 | 2 | fluoxetine    | Unclear | 11 | 36 (8)      | 0.55 | 20-20   | Fixed    | 20  | HAMD17           | 33    | 6  | Other operationalized | Asia          | Single center | Secondary/Tertiary care | Inpatients only  | No      | Unclear |  |  |
|                     |      |   |   | amitriptyline | Unclear | 12 | 34 (13)     | 0.58 | 25-75   | Other    | *   | HAMD 17          | 34    |    |                       |               |               |                         |                  |         |         |  |  |
| Fava 1998           | 1998 | 3 | 3 | paroxetine    | Yes     | 55 | 41.3 (12.6) | *    | 20-50   | Flexible | *   | HAMD 21          | 23.10 | 12 | DSM-III-R             | North America | Multi-center  | Unclear                 | Outpatients only | Yes     | Unclear |  |  |
|                     |      |   |   | fluoxetine    | No      | 54 | 41.3 (12.6) | *    | 20-80   | Flexible | *   | HAMD 21          | 23.90 |    |                       |               |               |                         |                  |         |         |  |  |
|                     |      |   |   | placebo       | No      | 19 | 41.3 (12.6) | *    | 0-0     | Flexible | 0   | HAMD 21          | 23.70 |    |                       |               |               |                         |                  |         |         |  |  |
| Fava 2002           | 2002 | 3 | 3 | sertraline    | No      | 96 | 44 (14.7)   | *    | 50-200  | Flexible | 108 | HAMD 17          | 21.00 | 10 | DSM-IV                | North America | Multi-center  | Secondary/Tertiary care | Outpatients only | Yes     | Yes     |  |  |
|                     |      |   |   | fluoxetine    | Yes     | 92 | 42.1 (13.5) | *    | 20-60   | Flexible | 42  | HAMD 17          | 20.50 |    |                       |               |               |                         |                  |         |         |  |  |
|                     |      |   |   | paroxetine    | No      | 96 | 42.5 (14.7) | *    | 20-60   | Flexible | 37  | HAMD 17          | 20.60 |    |                       |               |               |                         |                  |         |         |  |  |
| Fava 2005           | 2005 | 2 | 3 | placebo       | No      | 43 | 37.8 (12)   | *    | 0-0     | Fixed    | 0   | HAMD 17          | 19.90 | 12 | DSM-IV                | North America | Multi-center  | Secondary/Tertiary care | Outpatients only | Yes     | Unclear |  |  |
|                     |      |   |   | fluoxetine    | No      | 47 | 36.7 (9.6)  | *    | 20-20   | Fixed    | 20  | HAMD 17          | 19.60 |    |                       |               |               |                         |                  |         |         |  |  |
| Fawcett 1989        | 1989 | 2 | 2 | amitriptyline | No      | 20 | 44.5 (10.3) | *    | 50-200  | Flexible | *   | HAMD 21          | 23.50 | 6  | DSM-III               | North America | Multi-center  | Secondary/Tertiary care | Outpatients only | Yes     | Yes     |  |  |
|                     |      |   |   | fluoxetine    | Yes     | 20 | 39.9 (10.6) | *    | 20-60   | Flexible | *   | HAMD 21          | 23.60 |    |                       |               |               |                         |                  |         |         |  |  |
| Feiger 1996         | 1996 | 2 | 2 | nefazodone    | Yes     | 78 | 44.5 (11.5) | 0.55 | 100-600 | Flexible | 456 | HAMD 17          | 23.30 | 6  | DSM-III-R             | North America | Multi-center  | Other/Unclear           | Outpatients only | Unclear | Yes     |  |  |
|                     |      |   |   | sertraline    | No      | 82 | 43.1 (10)   | 0.48 | 50-200  | Flexible | 148 | HAMD 17          | 23.30 |    |                       |               |               |                         |                  |         |         |  |  |
| Feighner 1979       | 1979 | 2 | 4 | amitriptyline | No      | 93 | 40.9 (*)    | *    | 100-150 | Flexible | 115 | HAMD 24          | 36    | 4  | Feighner              | North America | Multi-center  | Secondary/Tertiary care | Outpatients only | Yes     | Unclear |  |  |
|                     |      |   |   | placebo       | No      | 50 | 40.9 (*)    | *    | 0-0     | Flexible | 0   | HAMD 24          | 34.7  |    |                       |               |               |                         |                  |         |         |  |  |
| Feighner 1980       | 1980 | 2 | 3 | trazodone     | Yes     | 19 | *           | 0.65 | 200-600 | Flexible | 313 | HAMD unspecified | 35.40 | 4  | Feighner              | North America | Unclear       | Secondary/Tertiary care | Inpatients only  | Yes     | Unclear |  |  |
|                     |      |   |   | placebo       | No      | 10 | *           | 0.60 | 0-0     | Flexible | 0   | HAMD unspecified | 36.00 |    |                       |               |               |                         |                  |         |         |  |  |

|                                                       |      |   |   |             |         |     |             |      |         |          |     |                  |       |   |           |               |               |                          |                  |         |         |
|-------------------------------------------------------|------|---|---|-------------|---------|-----|-------------|------|---------|----------|-----|------------------|-------|---|-----------|---------------|---------------|--------------------------|------------------|---------|---------|
| Feighner 1984                                         | 1984 | 2 | 2 | bupropion   | Yes     | 45  | 43.9 (*)    | *    | 300-600 | Flexible | 392 | HAMD 21          | 31.00 | 4 | Feighner  | North America | Unclear       | Secondary /Tertiary care | Inpatients only  | No      | Yes     |
|                                                       |      |   |   | placebo     | No      | 22  | 49 (*)      | *    | 0-0     | Flexible | 0   | HAMD 21          | 28.00 |   |           |               |               |                          |                  |         |         |
| Feighner 1989a                                        | 1989 | 2 | 3 | placebo     | No      | 59  | 39.7 (*)    | *    | 0-0     | Flexible | 0   | HAMD 21          | 25.90 | 6 | DSM-III   | North America | Single center | Unclear                  | Outpatients only | Yes     | Unclear |
|                                                       |      |   |   | fluoxetine  | Unclear | 62  | 45 (*)      | *    | *-80    | Flexible | *   | HAMD 21          | 25.60 |   |           |               |               |                          |                  |         |         |
| Feighner 1989b                                        | 1989 | 2 | 3 | fluvoxamine | Unclear | 31  | 41 (*)      | *    | 150-300 | Flexible | 145 | HAMD unspecified | 25.00 | 6 | DSM-III   | North America | Unclear       | Secondary /Tertiary care | Inpatients only  | No      | Unclear |
|                                                       |      |   |   | placebo     | No      | 19  | 41 (*)      | *    | 0-0     | Flexible | 0   | HAMD unspecified | 25.00 |   |           |               |               |                          |                  |         |         |
| Feighner 1991                                         | 1991 | 2 | 2 | fluoxetine  | No      | 62  | 42.9 (*)    | *    | 20-80   | Flexible | 38  | HAMD 17          | 26.10 | 6 | DSM-III-R | North America | Multi-center  | Unclear                  | Outpatients only | Yes     | Unclear |
|                                                       |      |   |   | bupropion   | Yes     | 61  | 40.9 (*)    | *    | 225-450 | Flexible | 382 | HAMD 17          | 25.30 |   |           |               |               |                          |                  |         |         |
| Feighner 1993a (Feighner 1989c PAR 03 001 - FDA)      | 1993 | 2 | 3 | paroxetine  | Yes     | 40  | 42.6 (*)    | 0.56 | 10-50   | Flexible | 26  | HAMD 21          | 24.80 | 6 | DSM-III   | North America | Single center | Secondary /Tertiary care | Outpatients only | Yes     | Unclear |
|                                                       |      |   |   | placebo     | No      | 40  | 42.3 (*)    | 0.55 | 0-0     | Flexible | 0   | HAMD 21          | 24.70 |   |           |               |               |                          |                  |         |         |
| Feighner 1993b (Cohn 1990 Cohn 1992 PAR 03 002 - FDA) | 1993 | 2 | 3 | paroxetine  | Yes     | 40  | 42.3 (*)    | 0.69 | 10-50   | Flexible | 31  | HAMD 21          | 25.60 | 6 | DSM-III   | North America | Single center | Secondary /Tertiary care | Outpatients only | Yes     | Unclear |
|                                                       |      |   |   | placebo     | No      | 40  | 41.3 (*)    | 0.47 | 0-0     | Flexible | 0   | HAMD 21          | 26.70 |   |           |               |               |                          |                  |         |         |
| Feighner 1993c (PAR 03 003 - FDA)                     | 1993 | 2 | 3 | paroxetine  | Yes     | 41  | 39.8 (*)    | 0.61 | 10-50   | Flexible | *   | HAMD 21          | 25.60 | 6 | DSM-III   | North America | Single center | Secondary /Tertiary care | Outpatients only | Yes     | Unclear |
|                                                       |      |   |   | placebo     | No      | 42  | 41.3 (*)    | 0.65 | 0-0     | Flexible | 0   | HAMD 21          | 26.70 |   |           |               |               |                          |                  |         |         |
| Feighner 1993d (Shrivastava 1992 PAR 03 004 - FDA)    | 1993 | 2 | 3 | paroxetine  | Yes     | 40  | 38 (*)      | 0.33 | 10-50   | Flexible | 40  | HAMD 21          | 27.60 | 6 | DSM-III   | North America | Single center | Unclear                  | Outpatients only | Yes     | Unclear |
|                                                       |      |   |   | placebo     | No      | 40  | 34.6 (*)    | 0.39 | 0-0     | Flexible | 0   | HAMD 21          | 26.70 |   |           |               |               |                          |                  |         |         |
| Feighner 1993e (Peselow 1989 PAR 03 005 - FDA)        | 1993 | 2 | 3 | paroxetine  | Yes     | 40  | 43.5 (*)    | 0.41 | 10-50   | Flexible | 38  | HAMD 21          | 25.60 | 6 | DSM-III   | North America | Single center | Unclear                  | Outpatients only | Yes     | Unclear |
|                                                       |      |   |   | placebo     | No      | 42  | 44.7 (*)    | 0.24 | 0-0     | Flexible | 0   | HAMD 21          | 26.70 |   |           |               |               |                          |                  |         |         |
| Feighner 1993f (Fabre 1992 PAR 03 006 - FDA)          | 1993 | 2 | 3 | paroxetine  | Yes     | 40  | 35.6 (*)    | 0.55 | 10-50   | Flexible | 35  | HAMD 21          | 29.70 | 6 | DSM-III   | North America | Single center | Unclear                  | Outpatients only | Yes     | Unclear |
|                                                       |      |   |   | placebo     | No      | 40  | 35.9 (*)    | 0.64 | 0-0     | Flexible | 0   | HAMD 21          | 28.80 |   |           |               |               |                          |                  |         |         |
| Feighner 1998                                         | 1998 | 2 | 2 | nefazodone  | Yes     | 61  | 37.2 (11.7) | 0.61 | 400-600 | Flexible | 503 | HAMD 17          | 27.50 | 6 | DSM-III-R | North America | Multi-center  | Secondary /Tertiary care | Inpatients only  | Unclear | Yes     |
|                                                       |      |   |   | placebo     | No      | 59  | 39.5 (12.3) | 0.63 | 0-0     | Flexible | 0   | HAMD 17          | 27.90 |   |           |               |               |                          |                  |         |         |
| Feighner 1999 (Study 91206 FDA)                       | 1999 | 4 | 5 | citalopram  | Yes     | 130 | 39 (*)      | 0.66 | 20-20   | Fixed    | 20  | HAMD 21          | 24.24 | 6 | DSM-III-R | North America | Multi-center  | Unclear                  | Outpatients only | Yes     | Yes     |
|                                                       |      |   |   | citalopram  | Yes     | 131 | 39 (*)      | 0.60 | 40-40   | Fixed    | 40  | HAMD 21          | 24.44 |   |           |               |               |                          |                  |         |         |
|                                                       |      |   |   | citalopram  | Yes     | 129 | 38 (*)      | 0.53 | 60-60   | Fixed    | 60  | HAMD 21          | 24.52 |   |           |               |               |                          |                  |         |         |



|                                        |      |   |   |               |         |     |             |      |         |          |     |                  |       |   |           |               |               |                          |                  |         |         |
|----------------------------------------|------|---|---|---------------|---------|-----|-------------|------|---------|----------|-----|------------------|-------|---|-----------|---------------|---------------|--------------------------|------------------|---------|---------|
|                                        |      |   |   | placebo       | No      | 129 | 38 (*)      | 0.55 | 0-0     | Fixed    | 0   | HAMD 21          | 24.62 |   |           |               |               |                          |                  |         |         |
| Fontaine 1994 (FDA 03A0A-003)          | 1994 | 3 | 4 | nefazodone    | Yes     | 46  | 39.9 (10.9) | 0.61 | 50-250  | Flexible | 242 | HAMD 17          | 25.20 | 6 | RDC       | North America | Single center | Secondary /Tertiary care | Outpatients only | Yes     | Yes     |
|                                        |      |   |   | nefazodone    | Yes     | 44  | 43.3 (10.6) | 0.73 | 100-500 | Flexible | 460 | HAMD 17          | 25.60 |   |           |               |               |                          |                  |         |         |
|                                        |      |   |   | placebo       | No      | 45  | 42.2 (10.7) | 0.67 | 0-0     | Flexible | 0   | HAMD 17          | 25.90 |   |           |               |               |                          |                  |         |         |
| Frank 2004                             | 2004 | 2 | 2 | citalopram    | Yes     | 8   | 39.12 (6.7) | 0.25 | 20-20   | Fixed    | 20  | *                | *     | 4 | DSM-IV    | North America | Single center | Secondary /Tertiary care | Outpatients only | No      | Unclear |
|                                        |      |   |   | placebo       | No      | 8   | 41.5 (7.1)  | 0.75 | 0-0     | Fixed    | 0   | *                | *     |   |           |               |               |                          |                  |         |         |
| Fudge 1990                             | 1990 | 2 | 2 | fluoxetine    | Unclear | 21  | *           | *    | 20-60   | Flexible | *   | HAMD unspecified | 23.20 | 6 | DSM-III   | North America | Single center | Secondary /Tertiary care | Outpatients only | Yes     | Unclear |
|                                        |      |   |   | trazodone     | Unclear | 17  | *           | *    | 50-400  | Flexible | *   | HAMD unspecified | 23.60 |   |           |               |               |                          |                  |         |         |
| Gagiano 1993                           | 1993 | 2 | 2 | paroxetine    | Yes     | 45  | 37.8 (12.5) | *    | 20-40   | Flexible | *   | HAMD 21          | 25.00 | 6 | DSM-III   | Africa        | Single center | Unclear                  | Outpatients only | Yes     | Unclear |
|                                        |      |   |   | fluoxetine    | No      | 45  | 39.6 (11.7) | *    | 20-60   | Flexible | *   | HAMD 21          | 24.50 |   |           |               |               |                          |                  |         |         |
| Gastpar 2006                           | 2006 | 2 | 3 | citalopram    | No      | 127 | 49.3 (10.7) | 0.65 | 20-20   | Fixed    | 20  | HAMD unspecified | 21.80 | 6 | DSM-IV    | Europe        | Multi-center  | Primary care             | Outpatients only | Unclear | Unclear |
|                                        |      |   |   | placebo       | No      | 130 | 49.4 (12.7) | 0.73 | 0-0     | Fixed    | 0   | HAMD unspecified | 22.00 |   |           |               |               |                          |                  |         |         |
| Gelenberg 1990                         | 1990 | 2 | 3 | amitriptyline | No      | 19  | *           | *    | 50-350  | Flexible | 114 | HAMD 21          | 24.84 | 6 | DSM-III   | North America | Single center | Secondary /Tertiary care | Outpatients only | Yes     | Yes     |
|                                        |      |   |   | placebo       | No      | 22  | *           | *    | 0-0     | Flexible | 0   | HAMD 21          | 23.6  |   |           |               |               |                          |                  |         |         |
| Gentil 2000                            | 2000 | 2 | 2 | venlafaxine   | Yes     | 57  | 37.9 (10.1) | *    | 75-150  | Flexible | 103 | HAMD 21          | 23.90 | 8 | DSM-IV    | South America | Multi-center  | Unclear                  | Outpatients only | Yes     | Yes     |
|                                        |      |   |   | amitriptyline | No      | 59  | 39.1 (8.7)  | *    | 75-150  | Flexible | 103 | HAMD 21          | 24.50 |   |           |               |               |                          |                  |         |         |
| Georgotas 1982                         | 1981 | 2 | 3 | amitriptyline | No      | 15  | 36.1 (2.84) | *    | 150-300 | Flexible | 206 | HAMD 21          | 28.5  | 4 | RDC       | North America | Unclear       | Unclear                  | Other/Unclear    | Unclear | Unclear |
|                                        |      |   |   | placebo       | No      | 18  | 39.5 (3.11) | *    | 0-0     | Flexible | 0   | HAMD 21          | 28.6  |   |           |               |               |                          |                  |         |         |
| Geretsegger 1995 (MY-060/BRL-029060/1) | 1995 | 2 | 2 | paroxetine    | Yes     | 44  | 71 (*)      | *    | 20-30   | Flexible | *   | HAMD 21          | 26.80 | 6 | DSM-III   | Europe        | Multi-center  | Unclear                  | Inpatients only  | No      | Unclear |
|                                        |      |   |   | amitriptyline | No      | 47  | 71.3 (*)    | *    | 100-150 | Flexible | *   | HAMD 21          | 28.30 |   |           |               |               |                          |                  |         |         |
| Gerner 1980                            | 1980 | 2 | 3 | trazodone     | Yes     | 19  | 68.4 (*)    | 0.62 | 100-400 | Flexible | 305 | HAMD unspecified | 27.38 | 4 | RDC       | North America | Unclear       | Unclear                  | Outpatients only | Unclear | Unclear |
|                                        |      |   |   | placebo       | No      | 20  | 68.4 (*)    | 0.62 | 0-0     | Flexible | 0   | HAMD unspecified | 25.00 |   |           |               |               |                          |                  |         |         |
| Gillin 1997                            | 1997 | 2 | 2 | nefazodone    | Yes     | 24  | 35.3 (8.8)  | 0.67 | 400-500 | Flexible | 435 | HAMD 17          | 22.90 | 8 | DSM-III-R | North America | Multi-center  | Unclear                  | Outpatients only | Unclear | Unclear |
|                                        |      |   |   | fluoxetine    | No      | 20  | 36.7 (8.5)  | 0.70 | 20-40   | Flexible | 34  | HAMD 17          | 23.20 |   |           |               |               |                          |                  |         |         |
| Ginestet 1989                          | 1989 | 2 | 2 | fluoxetine    | Unclear | 28  | 46.5 (10.8) | 0.71 | 20-80   | Flexible | 58  | HAMD 21          | 33.10 | 8 | DSM-III   | Europe        | Multi-center  | Secondary /Tertiary care | Inpatients only  | Unclear | Yes     |

|                                                  |      |   |   |                 |         |     |                 |      |         |          |     |                  |       |    |        |               |              |                          |                  |         |         |  |  |
|--------------------------------------------------|------|---|---|-----------------|---------|-----|-----------------|------|---------|----------|-----|------------------|-------|----|--------|---------------|--------------|--------------------------|------------------|---------|---------|--|--|
|                                                  |      |   |   | clomipramine    | No      | 26  | 51.6<br>(11)    | 0.73 | 50-200  | Flexible | 148 | HAMD 21          | 33.70 |    |        |               |              |                          |                  |         |         |  |  |
| Golden 2002a<br>(29060/448)                      | 2002 | 3 | 3 | paroxetine      | Yes     | 106 | 38.9<br>(10.6)  | *    | 25-62.5 | Flexible | *   | HAMD 17          | 23.00 | 12 | DSM-IV | North America | Multi-center | Unclear                  | Outpatients only | Yes     | Unclear |  |  |
|                                                  |      |   |   | paroxetine      | Yes     | 106 | 39.4<br>(10.7)  | *    | 20-50   | Flexible | *   | HAMD 17          | 23.30 |    |        |               |              |                          |                  |         |         |  |  |
|                                                  |      |   |   | placebo         | No      | 103 | 38.7<br>(9.91)  | *    | 0-0     | Flexible | 0   | HAMD 17          | 23.40 |    |        |               |              |                          |                  |         |         |  |  |
| Golden 2002b<br>(29060/449)                      | 2002 | 3 | 3 | paroxetine      | Yes     | 108 | 42.38<br>(10.8) | *    | 25-62.5 | Flexible | *   | HAMD 17          | 23.80 | 12 | DSM-IV | North America | Multi-center | Unclear                  | Outpatients only | Yes     | Unclear |  |  |
|                                                  |      |   |   | paroxetine      | Yes     | 112 | 40.55<br>(12.1) | *    | 20-50   | Flexible | *   | HAMD 17          | 23.70 |    |        |               |              |                          |                  |         |         |  |  |
|                                                  |      |   |   | placebo         | No      | 110 | 40.71<br>(11.6) | *    | 0-0     | Flexible | 0   | HAMD 17          | 23.50 |    |        |               |              |                          |                  |         |         |  |  |
| Goldstein 2002<br>(HMAQ - Study Group A)         | 2002 | 3 | 3 | duloxetine      | Yes     | 70  | 42.33<br>(10.8) | *    | 40-120  | Flexible | *   | HAMD 17          | 18.47 | 10 | DSM-IV | North America | Multi-center | Unclear                  | Outpatients only | Yes     | Unclear |  |  |
|                                                  |      |   |   | placebo         | No      | 70  | 41.35<br>(13.2) | *    | 0-0     | Flexible | 0   | HAMD 17          | 19.44 |    |        |               |              |                          |                  |         |         |  |  |
|                                                  |      |   |   | fluoxetine      | No      | 33  | 39.69<br>(10.5) | *    | 20-20   | Flexible | *   | HAMD 17          | 17.88 |    |        |               |              |                          |                  |         |         |  |  |
| Goldstein 2004a (HMAT - Study Group A, ID#4091)  | 2004 | 4 | 4 | duloxetine      | Yes     | 91  | 43.36<br>(15.3) | *    | 40-40   | Fixed    | 40  | HAMD 17          | 17.47 | 8  | DSM-IV | North America | Multi-center | Unclear                  | Outpatients only | Yes     | Unclear |  |  |
|                                                  |      |   |   | duloxetine      | Yes     | 84  | 43.68<br>(14.1) | *    | 80-80   | Fixed    | 80  | HAMD 17          | 17.44 |    |        |               |              |                          |                  |         |         |  |  |
|                                                  |      |   |   | placebo         | No      | 90  | 43.18<br>(14.5) | *    | 0-0     | Fixed    | 0   | HAMD 17          | 17.79 |    |        |               |              |                          |                  |         |         |  |  |
|                                                  |      |   |   | paroxetine      | Yes     | 89  | 44.43<br>(14.7) | *    | 20-20   | Fixed    | 20  | HAMD 17          | 17.97 |    |        |               |              |                          |                  |         |         |  |  |
| Goldstein 2004b (HMAT - Study Group B, ID#4091)  | 2004 | 4 | 4 | duloxetine      | Yes     | 86  | 40.69<br>(10.0) | *    | 40-40   | Fixed    | 40  | HAMD 17          | 18.63 | 8  | DSM-IV | North America | Multi-center | Unclear                  | Outpatients only | Yes     | Unclear |  |  |
|                                                  |      |   |   | duloxetine      | Yes     | 91  | 40.89<br>(11.9) | *    | 80-80   | Fixed    | 80  | HAMD 17          | 18.06 |    |        |               |              |                          |                  |         |         |  |  |
|                                                  |      |   |   | placebo         | No      | 89  | 40.14<br>(12.9) | *    | 0-0     | Fixed    | 0   | HAMD 17          | 17.19 |    |        |               |              |                          |                  |         |         |  |  |
|                                                  |      |   |   | paroxetine      | No      | 87  | 40.25<br>(11.0) | *    | 20-20   | Fixed    | 20  | HAMD 17          | 17.65 |    |        |               |              |                          |                  |         |         |  |  |
| Gommoll 2014<br>(LVM-MD-02, NCT00969150)         | 2014 | 2 | 2 | placebo         | No      | 182 | 43.7<br>(13.3)  | 0.64 | 0-0     | Flexible | 0   | HAMD 17          | 24.40 | 8  | DSM-IV | North America | Multi-center | Unclear                  | Outpatients only | Yes     | Unclear |  |  |
|                                                  |      |   |   | levomilnacipran | Yes     | 175 | 42.8<br>(12.9)  | 0.57 | 40-120  | Flexible | 93  | HAMD 17          | 24.90 |    |        |               |              |                          |                  |         |         |  |  |
| Goodarzi 2015 (IRCT2012 101811155N1)             | 2015 | 2 | 2 | mirtazapine     | Unclear | 24  | 38<br>(5.47)    | 0.79 | 30-30   | Fixed    | 30  | HAMD unspecified | 30.58 | 8  | DSM-IV | Asia          | Multi-center | Secondary /Tertiary care | Both             | Unclear | Unclear |  |  |
|                                                  |      |   |   | citalopram      | Unclear | 28  | 40.35<br>(10.2) | 0.89 | 40-40   | Fixed    | 40  | HAMD unspecified | 28.85 |    |        |               |              |                          |                  |         |         |  |  |
| Gorman 2002<br>(SCT-MD-02)                       | 2002 | 3 | 3 | escitalopram    | Yes     | 129 | 41.4<br>(11.9)  | *    | 10-20   | Flexible | *   | HAMD unspecified | 24.80 | 8  | DSM-IV | North America | Multi-center | Unclear                  | Outpatients only | Yes     | Unclear |  |  |
|                                                  |      |   |   | citalopram      | Yes     | 128 | 42.1<br>(12.7)  | *    | 20-40   | Flexible | *   | HAMD unspecified | 25.00 |    |        |               |              |                          |                  |         |         |  |  |
|                                                  |      |   |   | placebo         | No      | 129 | 42.2<br>(12.5)  | *    | 0-0     | Flexible | 0   | HAMD unspecified | 25.00 |    |        |               |              |                          |                  |         |         |  |  |
| Griebel 2012<br>(Study DF15878)<br>(NCT00358631) | 2012 | 2 | 4 | escitalopram    | No      | 84  | 40.8<br>(10.7)  | 0.62 | 10-10   | Fixed    | 10  | HAMD 17          | 23.40 | 8  | DSM-IV | North America | Multi-center | Unclear                  | Outpatients only | Yes     | Unclear |  |  |
|                                                  |      |   |   | placebo         | No      | 76  | 41.2<br>(12.4)  | 0.63 | 0-0     | Fixed    | 0   | HAMD 17          | 23.00 |    |        |               |              |                          |                  |         |         |  |  |

|                                                      |                 |   |   |                  |         |     |                |      |         |          |     |         |       |    |               |                       |                  |                                |                     |     |         |
|------------------------------------------------------|-----------------|---|---|------------------|---------|-----|----------------|------|---------|----------|-----|---------|-------|----|---------------|-----------------------|------------------|--------------------------------|---------------------|-----|---------|
| Griebel 2012b<br>(Study<br>DF15879)<br>(NCT00361491) | 2012            | 2 | 4 | paroxetine       | No      | 80  | 40<br>(13.2)   | 0.70 | 20-20   | Fixed    | 20  | HAMD 17 | 24.90 | 8  | DSM-IV        | Cross-<br>Continental | Multi-<br>center | Unclear                        | Outpatients<br>only | Yes | Unclear |
|                                                      |                 |   |   | placebo          | No      | 79  | 40.1<br>(10.6) | 0.73 | 0-0     | Fixed    | 0   | HAMD 17 | 24.80 |    |               |                       |                  |                                |                     |     |         |
| Grunebaum<br>2011<br>(NCT00429169)                   | 2011            | 2 | 2 | bupropion        | Yes     | 40  | 37.9<br>(11.9) | *    | 300-450 | Flexible | 275 | HAMD 17 | 17.60 | 24 | DSM-IV        | North<br>America      | Single<br>center | Secondary<br>/Tertiary<br>care | Both                | No  | Yes     |
|                                                      |                 |   |   | paroxetine       | Yes     | 38  | 35.2<br>(12.8) | *    | 37.5-50 | Flexible | 34  | HAMD 17 | 16.90 |    |               |                       |                  |                                |                     |     |         |
| GSK14                                                | unpublis<br>hed | 2 | 2 | bupropion        | Yes     | 77  | 45.9<br>(*)    | *    | 300-600 | Flexible | *   | HAMD 21 | 31.20 | 4  | DSM-III       | North<br>America      | Multi-<br>center | Unclear                        | Inpatients<br>only  | No  | Unclear |
|                                                      |                 |   |   | placebo          | No      | 40  | 48.2<br>(*)    | *    | 0-0     | Flexible | 0   | HAMD 21 | 30.30 |    |               |                       |                  |                                |                     |     |         |
| Guelfi 1995<br>(VEN 600A-206<br>FDA)                 | 1995            | 2 | 2 | venlafaxine      | Yes     | 46  | 56<br>(14)     | *    | 150-375 | Flexible | 350 | HAMD 21 | 28.20 | 4  | DSM-<br>III-R | Europe                | Multi-<br>center | Secondary<br>/Tertiary<br>care | Inpatients<br>only  | Yes | Yes     |
|                                                      |                 |   |   | placebo          | No      | 47  | 56<br>(13)     | *    | 0-0     | Flexible | 0   | HAMD 21 | 28.60 |    |               |                       |                  |                                |                     |     |         |
| Guelfi 1998                                          | 1998            | 3 | 3 | milnacipran      | Yes     | 100 | 45.6<br>(12.4) | *    | 100-100 | Fixed    | 100 | HAMD 17 | 27.90 | 12 | DSM-<br>III-R | Europe                | Multi-<br>center | Secondary<br>/Tertiary<br>care | Inpatients<br>only  | Yes | Yes     |
|                                                      |                 |   |   | milnacipran      | Yes     | 100 | 45.2<br>(12.5) | *    | 200-200 | Fixed    | 200 | HAMD 17 | 27.70 |    |               |                       |                  |                                |                     |     |         |
|                                                      |                 |   |   | fluoxetine       | No      | 100 | 45.8<br>(12.8) | *    | 20-20   | Fixed    | 20  | HAMD 17 | 27.40 |    |               |                       |                  |                                |                     |     |         |
| Guillibert 1989<br>(PAR 290 MDF<br>29060 1727 M)     | 1989            | 2 | 2 | clomipramin<br>e | No      | 39  | 68.1<br>(6.1)  | *    | 75-75   | Fixed    | 75  | HAMD 21 | 27.50 | 6  | DSM-III       | Europe                | Multi-<br>center | Unclear                        | Unclear             | Yes | Yes     |
|                                                      |                 |   |   | paroxetine       | Yes     | 40  | 69.3<br>(5.3)  | *    | 30-30   | Fixed    | 30  | HAMD 21 | 27.90 |    |               |                       |                  |                                |                     |     |         |
| Hackett 1998                                         | 1998            | 2 | 2 | fluvoxamine      | No      | 34  | *              | *    | 200-200 | Fixed    | 200 | MADRS   | 31.60 | 6  | DSM-<br>III-R | Europe                | Multi-<br>center | Unclear                        | Outpatients<br>only | No  | Unclear |
|                                                      |                 |   |   | venlafaxine      | Yes     | 77  | *              | *    | 150-150 | Fixed    | 150 | MADRS   | 32.20 |    |               |                       |                  |                                |                     |     |         |
| Hale 2010 (CL3-<br>20098-045)                        | 2008            | 2 | 2 | agomelatine      | Yes     | 252 | 41.8<br>(11.2) | 0.77 | 25-50   | Flexible | *   | HAMD 17 | 28.50 | 24 | DSM-IV        | Cross-<br>Continental | Multi-<br>center | Primary<br>care                | Outpatients<br>only | No  | No      |
|                                                      |                 |   |   | fluoxetine       | No      | 263 | 42.7<br>(11.9) | 0.78 | 20-40   | Flexible | *   | HAMD 17 | 28.70 |    |               |                       |                  |                                |                     |     |         |
| Halikas 1995<br>(MIR 003-023 -<br>FDA)               | 1995            | 3 | 3 | mirtazapine      | Yes     | 50  | 63 (*)         | 0.43 | 5-35    | Flexible | 29  | HAMD 21 | 24.60 | 6  | DSM-III       | North<br>America      | Unclear          | Unclear                        | Outpatients<br>only | Yes | Yes     |
|                                                      |                 |   |   | trazodone        | No      | 50  | 61 (*)         | 0.60 | 40-280  | Flexible | 220 | HAMD 21 | 24.60 |    |               |                       |                  |                                |                     |     |         |
|                                                      |                 |   |   | placebo          | No      | 50  | 62 (*)         | 0.59 | 0-0     | Flexible | 0   | HAMD 21 | 23.50 |    |               |                       |                  |                                |                     |     |         |
| Hao 2014                                             | 2014            | 2 | 2 | duloxetine       | Yes     | 140 | 38.4<br>(13)   | 0.56 | 60-60   | Fixed    | 60  | HAMD 17 | 23.70 | 6  | DSM-IV        | Asia                  | Multi-<br>center | Both                           | Both                | No  | Yes     |
|                                                      |                 |   |   | paroxetine       | No      | 141 | 38.5<br>(1.6)  | 0.62 | 20-20   | Fixed    | 20  | HAMD 17 | 23.70 |    |               |                       |                  |                                |                     |     |         |
| Harris 1991                                          | 1991            | 2 | 2 | fluvoxamine      | Unclear | 35  | 38.6<br>(12.1) | 0.63 | 50-150  | Flexible | 115 | HAMD 17 | 22.70 | 6  | DSM-III       | Europe                | Multi-<br>center | Secondary<br>/Tertiary<br>care | Outpatients<br>only | Yes | Yes     |
|                                                      |                 |   |   | amitriptyline    | Unclear | 34  | 48.1<br>(12.3) | 0.82 | 50-150  | Flexible | 99  | HAMD 17 | 22.80 |    |               |                       |                  |                                |                     |     |         |
| Heiligenstein<br>1994                                | 1994            | 2 | 2 | fluoxetine       | Yes     | 46  | 41.6<br>(10.9) | *    | 20-20   | Fixed    | 20  | HAMD 17 | 21.10 | 8  | DSM-<br>III-R | North<br>America      | Multi-<br>center | Secondary<br>/Tertiary<br>care | Outpatients<br>only | Yes | Yes     |

|                                             |      |   |   |               |     |     |                     |      |         |          |     |                     |       |    |         |                       |                  |                                |                     |         |         |  |
|---------------------------------------------|------|---|---|---------------|-----|-----|---------------------|------|---------|----------|-----|---------------------|-------|----|---------|-----------------------|------------------|--------------------------------|---------------------|---------|---------|--|
|                                             |      |   |   | placebo       | No  | 43  | 39.2<br>(9.8)       | *    | 0-0     | Fixed    | 0   | HAMD 17             | 21.60 |    |         |                       |                  |                                |                     |         |         |  |
| Heller 2009<br>(NCT00909155)                | 2009 | 2 | 2 | venlafaxine   | Yes | 15  | 30.74<br>(11.5)     | 0.53 | 75-300  | Flexible | 118 | HAMD 21             | 20.07 | 24 | DSM-IV  | North<br>America      | Unclear          | /Unclear                       | Other/Unclear       | Unclear | Unclear |  |
|                                             |      |   |   | fluoxetine    | No  | 14  | 33.14<br>(10.7)     | 0.57 | 20-80   | Flexible | 37  | HAMD 21             | 21.36 |    |         |                       |                  |                                |                     |         |         |  |
| Henigsberg<br>2012 (305,<br>NCT00735709)    | 2012 | 3 | 4 | placebo       | No  | 140 | 46.4<br>(12.3)      | 0.61 | 0-0     | Fixed    | 0   | HAMD 24             | 32.70 | 8  | DSM-IV  | Cross-<br>Continental | Multi-<br>center | Unclear                        | Unclear             | Unclear | Unclear |  |
|                                             |      |   |   | vortioxetine  | Yes | 140 | 47.3<br>(11.9)      | 0.62 | 5-5     | Fixed    | 5   | HAMD 24             | 32.10 |    |         |                       |                  |                                |                     |         |         |  |
|                                             |      |   |   | vortioxetine  | Yes | 140 | 46.4<br>(12.3)      | 0.61 | 10-10   | Fixed    | 10  | HAMD 24             | 33.10 |    |         |                       |                  |                                |                     |         |         |  |
| Heun 2013<br>(ISRCTN1575073<br>60)          | 2013 | 2 | 2 | agomelatine   | Yes | 151 | 71.9<br>(5.1)       | 0.70 | 25-50   | Flexible | *   | HAMD 17             | 26.80 | 8  | DSM-IV  | Cross-<br>Continental | Multi-<br>center | Both                           | Outpatients<br>only | Unclear | Yes     |  |
|                                             |      |   |   | placebo       | No  | 71  | 71.7<br>(4.8)       | 0.65 | 0-0     | Flexible | 0   | HAMD 17             | 26.70 |    |         |                       |                  |                                |                     |         |         |  |
| Hewett 2009<br>(WXL101497)                  | 2009 | 3 | 3 | bupropion     | Yes | 188 | 41.8<br>(11.7)      | *    | 150-300 | Flexible | *   | MADRS               | 30.40 | 12 | DSM-IV  | Cross-<br>Continental | Multi-<br>center | Secondary<br>/Tertiary<br>care | Outpatients<br>only | Yes     | Unclear |  |
|                                             |      |   |   | venlafaxine   | No  | 189 | 42.7<br>(11.48<br>) | *    | 75-150  | Flexible | *   | MADRS               | 30.00 |    |         |                       |                  |                                |                     |         |         |  |
|                                             |      |   |   | placebo       | No  | 199 | 41.8<br>(11.6)      | *    | 0-0     | Flexible | 0   | MADRS               | 30.40 |    |         |                       |                  |                                |                     |         |         |  |
| Hewett 2010a<br>(AK130940)<br>(NCT00093288) | 2010 | 2 | 2 | bupropion     | Yes | 212 | 70.9<br>(5.55)      | *    | 150-300 | Flexible | *   | MADRS               | 29.50 | 10 | DSM-IV  | Cross-<br>Continental | Multi-<br>center | Unclear                        | Outpatients<br>only | Unclear | Unclear |  |
|                                             |      |   |   | placebo       | No  | 208 | 71.3<br>(5.88)      | *    | 0-0     | Flexible | 0   | MADRS               | 29.80 |    |         |                       |                  |                                |                     |         |         |  |
| Hewett 2010b<br>(AK130939)                  | 2010 | 2 | 3 | venlafaxine   | No  | 198 | 44.1<br>(11.5)      | *    | 75-150  | Flexible | 85  | MADRS               | 30.10 | 8  | DSM-IV  | Cross-<br>Continental | Multi-<br>center | Unclear                        | Outpatients<br>only | No      | Unclear |  |
|                                             |      |   |   | placebo       | No  | 189 | 44.5<br>(10.8)      | *    | 0-0     | Flexible | 0   | MADRS               | 30.60 |    |         |                       |                  |                                |                     |         |         |  |
| Hicks 1988                                  | 1988 | 2 | 3 | amitriptyline | No  | 16  | 42.2<br>(*)         | *    | 25-300  | Flexible | 142 | HAMD 17             | 30.8  | 6  | DSM-III | North<br>America      | Single<br>center | Secondary<br>/Tertiary<br>care | Inpatients<br>only  | Yes     | Unclear |  |
|                                             |      |   |   | placebo       | No  | 15  | 40.8<br>(*)         | *    | 0-0     | Flexible | 0   | HAMD 17             | 29.4  |    |         |                       |                  |                                |                     |         |         |  |
| Hicks 2002                                  | 2002 | 2 | 2 | nefazodone    | Yes | 20  | 42.8<br>(11.9)      | 0.40 | 400-600 | Flexible | 495 | HAMD<br>unspecified | 21.60 | 24 | DSM-IV  | Europe                | Single<br>center | Secondary<br>/Tertiary<br>care | Outpatients<br>only | Unclear | No      |  |
|                                             |      |   |   | paroxetine    | No  | 20  | 43<br>(10.1)        | 0.45 | 20-40   | Flexible | 30  | HAMD<br>unspecified | 22.30 |    |         |                       |                  |                                |                     |         |         |  |
| Higuchi 2014<br>(NCT01441440)               | 2016 | 3 | 3 | venlafaxine   | Yes | 174 | 38.4<br>(11.9)      | 0.52 | 75-75   | Fixed    | 75  | HAMD 17             | *     | 8  | DSM-IV  | Asia                  | Multi-<br>center | Unclear                        | Outpatients<br>only | Unclear | Unclear |  |
|                                             |      |   |   | venlafaxine   | Yes | 180 | 38.3<br>(10.2)      | 0.48 | 75-225  | Flexible | *   | HAMD 17             | *     |    |         |                       |                  |                                |                     |         |         |  |
|                                             |      |   |   | placebo       | No  | 184 | 38.6<br>(11.1)      | 0.51 | 0-0     | Flexible | 0   | HAMD 17             | *     |    |         |                       |                  |                                |                     |         |         |  |
| Higuchi 2009                                | 2009 | 4 | 4 | duloxetine    | Yes | 75  | 37.9<br>(9.3)       | *    | 40-40   | Flexible | 40  | HAMD 17             | 20.60 | 6  | DSM-IV  | Asia                  | Multi-<br>center | Both                           | Both                | Yes     | Yes     |  |
|                                             |      |   |   | duloxetine    | Yes | 75  | 39<br>(10.1)        | *    | 60-60   | Fixed    | 60  | HAMD 17             | 20.40 |    |         |                       |                  |                                |                     |         |         |  |
|                                             |      |   |   | paroxetine    | No  | 148 | 37.9<br>(9.6)       | *    | 20-40   | Flexible | *   | HAMD 17             | 20.40 |    |         |                       |                  |                                |                     |         |         |  |

|                                                 |      |   |   |               |         |     |                 |      |          |               |    |                  |       |   |                       |               |               |                         |                  |         |         |  |  |
|-------------------------------------------------|------|---|---|---------------|---------|-----|-----------------|------|----------|---------------|----|------------------|-------|---|-----------------------|---------------|---------------|-------------------------|------------------|---------|---------|--|--|
|                                                 |      |   |   | placebo       | No      | 146 | 38.7<br>(10.5)  | *    | 0-0      | Fixed         | 0  | HAMD 17          | 20.40 |   |                       |               |               |                         |                  |         |         |  |  |
| Higuchi 2011<br>(PCR112810,<br>NCT00866294)     | 2011 | 3 | 3 | paroxetine    | Yes     | 83  | 35.5<br>(10.4)  | *    | 20-40    | Flexible      | *  | HAMD 17          | 22.70 | 8 | DSM-IV                | Asia          | Multi-center  | Unclear                 | Unclear          | Yes     | Unclear |  |  |
|                                                 |      |   |   | paroxetine    | Yes     | 161 | 36.4<br>(11.5)  | *    | 25-50    | Flexible      | *  | HAMD 17          | 22.70 |   |                       |               |               |                         |                  |         |         |  |  |
|                                                 |      |   |   | placebo       | No      | 172 | 36.8<br>(10.1)  | *    | 0-0      | Flexible      | 0  | HAMD 17          | 22.60 |   |                       |               |               |                         |                  |         |         |  |  |
| Hirayasu 2011a                                  | 2011 | 3 | 3 | escitalopram  | Yes     | 105 | 35.9<br>(11.2)  | *    | 20-20    | Fixed         | 20 | HAMD 17          | 22.20 | 8 | DSM-IV                | Asia          | Multi-center  | Both                    | Outpatients only | No      | Yes     |  |  |
|                                                 |      |   |   | escitalopram  | Yes     | 100 | 33.1<br>(9)     | *    | 10-10    | Fixed         | 10 | HAMD 17          | 22.30 |   |                       |               |               |                         |                  |         |         |  |  |
|                                                 |      |   |   | placebo       | No      | 105 | 34.7<br>(8.6)   | *    | 0-0      | Fixed         | 0  | HAMD 17          | 22.50 |   |                       |               |               |                         |                  |         |         |  |  |
| Hirayasu 2011b                                  | 2011 | 4 | 4 | placebo       | No      | 124 | 36.4<br>(10.8)  | *    | 0-0      | Fixed         | 0  | MADRS            | 29.00 | 8 | DSM-IV                | Asia          | Multi-center  | Both                    | Outpatients only | Yes     | Yes     |  |  |
|                                                 |      |   |   | escitalopram  | Yes     | 121 | 36.3<br>(9.7)   | *    | 10-10    | Fixed         | 10 | MADRS            | 29.40 |   |                       |               |               |                         |                  |         |         |  |  |
|                                                 |      |   |   | escitalopram  | Yes     | 119 | 35.7<br>(9.8)   | *    | 20-20    | Fixed         | 20 | MADRS            | 29.80 |   |                       |               |               |                         |                  |         |         |  |  |
|                                                 |      |   |   | paroxetine    | No      | 121 | 36.3<br>(8.4)   | *    | 20-40    | Flexible      | *  | MADRS            | 29.80 |   |                       |               |               |                         |                  |         |         |  |  |
| Hong 2003<br>(22521)                            | 2003 | 2 | 2 | mirtazapine   | Yes     | 66  | 47.2<br>(14.7)  | *    | 30-45    | Flexible      | 34 | HAMD 17          | 23.10 | 6 | DSM-IV                | Asia          | Multi-center  | Secondary/Tertiary care | Outpatients only | Yes     | Unclear |  |  |
|                                                 |      |   |   | fluoxetine    | No      | 66  | 47.1<br>(15.5)  | *    | 20-40    | Flexible      | 31 | HAMD 17          | 24.30 |   |                       |               |               |                         |                  |         |         |  |  |
| Hormazabal<br>1985                              | 1985 | 2 | 3 | amitriptyline | No      | 20  | 43.9<br>(15.3)  | *    | 50-150   | Flexible      | 86 | HAMD 21          | 36.7  | 4 | DSM-III               | South America | Unclear       | Unclear                 | Both             | Unclear | Unclear |  |  |
|                                                 |      |   |   | placebo       | No      | 20  | 42.3<br>(14.5)  | *    | 0-0      | Flexible      | 0  | HAMD 21          | 35.8  |   |                       |               |               |                         |                  |         |         |  |  |
| Hosseini 2015<br>(IRCT20120304<br>8513N1.)      | 2015 | 2 | 2 | venlafaxine   | No      | 28  | 37.12<br>(10.9) | 0.75 | 37.5-150 | Other/Unclear | *  | HAMD unspecified | 19.88 | 8 | DSM-IV                | Asia          | Single center | Secondary/Tertiary care | Outpatients only | Unclear | Unclear |  |  |
|                                                 |      |   |   | citalopram    | No      | 25  | 35.6<br>(8.72)  | 0.91 | 10-40    | Other/Unclear | *  | HAMD unspecified | 17.63 |   |                       |               |               |                         |                  |         |         |  |  |
| Hoyberg 1996<br>(Organon<br>88013,<br>FDA88013) | 1996 | 2 | 2 | mirtazapine   | Yes     | 56  | 70.3<br>(5.4)   | *    | 15-45    | Flexible      | 37 | HAMD 17          | 26.70 | 6 | DSM-III               | Europe        | Multi-center  | Secondary/Tertiary care | Outpatients only | No      | Yes     |  |  |
|                                                 |      |   |   | amitriptyline | No      | 59  | 71.3<br>(5.6)   | *    | 30-90    | Flexible      | 74 | HAMD 17          | 25.70 |   |                       |               |               |                         |                  |         |         |  |  |
| Hsu 2011                                        | 2011 | 2 | 2 | citalopram    | No      | 25  | 43.4<br>(11.4)  | *    | 20-*     | Flexible      | 23 | MADRS            | 36.60 | 6 | DSM-IV                | Asia          | Single center | Secondary/Tertiary care | Other/Unclear    | No      | Yes     |  |  |
|                                                 |      |   |   | sertraline    | No      | 26  | 38<br>(13.8)    | *    | 50-*     | Flexible      | 57 | MADRS            | 38.20 |   |                       |               |               |                         |                  |         |         |  |  |
| Hu 2009                                         | 2009 | 2 | 2 | escitalopram  | Unclear | 25  | 30.92<br>(8.04) | 0.52 | 10-20    | Flexible      | *  | HAMD 17          | 21.30 | 6 | Other operationalized | Asia          | Single center | Secondary/Tertiary care | Outpatients only | Yes     | Yes     |  |  |
|                                                 |      |   |   | citalopram    | Unclear | 23  | 30.61<br>(8.61) | 0.57 | 20-40    | Flexible      | *  | HAMD 17          | 20.78 |   |                       |               |               |                         |                  |         |         |  |  |

|                                  |      |   |   |                |         |     |               |      |         |          |     |            |       |   |                       |                   |               |                         |                  |         |         |  |
|----------------------------------|------|---|---|----------------|---------|-----|---------------|------|---------|----------|-----|------------|-------|---|-----------------------|-------------------|---------------|-------------------------|------------------|---------|---------|--|
| Hunter 2010 (Study 1)            | 2010 | 2 | 2 | fluoxetine     | Yes     | 14  | 42.4 (12.6)   | 0.68 | 20-20   | Fixed    | 20  | HAMD 17    | 22.10 | 8 | DSM-IV                | North America     | Multi-center  | Unclear                 | Outpatients only | Yes     | No      |  |
|                                  |      |   |   | placebo        | No      | 14  | 42.4 (12.6)   | 0.68 | 0-0     | Fixed    | 0   | HAMD 17    | 22.10 |   |                       |                   |               |                         |                  |         |         |  |
| Hunter 2010 (Study 2)            | 2010 | 2 | 2 | venlafaxine    | Yes     | 17  | 44.7 (14)     | 0.64 | 150-150 | Fixed    | 150 | HAMD 17    | 22.30 | 8 | DSM-IV                | North America     | Multi-center  | Unclear                 | Outpatients only | Yes     | No      |  |
|                                  |      |   |   | placebo        | No      | 16  | 44.7 (14)     | 0.64 | 0-0     | Fixed    | 0   | HAMD 17    | 22.30 |   |                       |                   |               |                         |                  |         |         |  |
| Hunter 2010 (Study 3)            | 2010 | 2 | 2 | venlafaxine    | Yes     | 18  | 38.1 (12.5)   | 0.55 | 150-150 | Fixed    | 150 | HAMD 17    | 21.50 | 8 | DSM-IV                | North America     | Multi-center  | Unclear                 | Outpatients only | Yes     | No      |  |
|                                  |      |   |   | placebo        | No      | 15  | 38.1 (12.5)   | 0.55 | 0-0     | Fixed    | 0   | HAMD 17    | 21.50 |   |                       |                   |               |                         |                  |         |         |  |
| Hutchinson 1992                  | 1992 | 2 | 2 | amitriptyline  | No      | 32  | 71.5 (9.5)    | *    | 100-100 | Fixed    | 100 | HAMD 21    | 20.28 | 6 | DSM-III               | Europe            | Multi-center  | Primary care            | Outpatients only | Yes     | Yes     |  |
|                                  |      |   |   | paroxetine     | Yes     | 58  | 72 (5.6)      | *    | 30-30   | Fixed    | 30  | HAMD 21    | 21.56 |   |                       |                   |               |                         |                  |         |         |  |
| Itil 1983                        | 1983 | 2 | 3 | fluvoxamine    | Yes     | 22  | 41.3 (*)      | 0.43 | 50-300  | Flexible | 101 | HAMD 17    | 20.30 | 4 | RDC                   | North America     | Unclear       | Unclear                 | Outpatients only | Yes     | Yes     |  |
|                                  |      |   |   | placebo        | No      | 22  | 41.3 (*)      | 0.43 | 0-0     | Flexible | 0   | HAMD 17    | 19.70 |   |                       |                   |               |                         |                  |         |         |  |
| Iwata 2013 (NCT00798707)         | 2013 | 2 | 3 | desvenlafaxine | Yes     | 237 | 39 (12)       | 0.56 | 50-50   | Fixed    | 50  | HAMD 17    | 23    | 8 | DSM-IV                | Cross-Continental | Multi-center  | Unclear                 | Outpatients only | Yes     | Unclear |  |
|                                  |      |   |   | placebo        | No      | 235 | 40 (12)       | 0.55 | 0-0     | Fixed    | 0   | HAMD 17    | 23    |   |                       |                   |               |                         |                  |         |         |  |
| Jacobsen 2015 (316, NCT01163266) | 2015 | 3 | 3 | placebo        | No      | 157 | 42.3 (11.6)   | 0.70 | 0-0     | Fixed    | 0   | MADRS      | 32.00 | 8 | DSM-IV                | North America     | Multi-center  | Unclear                 | Unclear          | Unclear | Unclear |  |
|                                  |      |   |   | vortioxetine   | Yes     | 155 | 43.1 (12.0)   | 0.76 | 10-10   | Fixed    | 10  | MADRS      | 32.30 |   |                       |                   |               |                         |                  |         |         |  |
|                                  |      |   |   | vortioxetine   | Yes     | 150 | 43.1 (13.1)   | 0.71 | 20-20   | Fixed    | 20  | MADRS      | 32.40 |   |                       |                   |               |                         |                  |         |         |  |
| Jain 2013 (303, NCT00672958)     | 2013 | 2 | 2 | placebo        | No      | 300 | 42.4 (12.7)   | 0.55 | 0-0     | Fixed    | 0   | HAMD 24    | 32.20 | 6 | DSM-IV                | North America     | Multi-center  | Both                    | Outpatients only | Unclear | No      |  |
|                                  |      |   |   | vortioxetine   | Yes     | 300 | 42.5 (13.0)   | 0.62 | 5-5     | Fixed    | 5   | HAMD 24    | 32.70 |   |                       |                   |               |                         |                  |         |         |  |
| Jefferson 2000 (29060/785)       | 2000 | 4 | 5 | placebo        | No      | 105 | 40.2 (11.5)   | *    | 0-0     | Fixed    | 0   | MADRS      | 31.70 | 6 | DSM-IV                | North America     | Multi-center  | Unclear                 | Outpatients only | No      | Unclear |  |
|                                  |      |   |   | paroxetine     | Yes     | 103 | 41.5 (12.1)   | *    | 25-25   | Fixed    | 25  | MADRS      | 31.40 |   |                       |                   |               |                         |                  |         |         |  |
|                                  |      |   |   | citalopram     | Yes     | 107 | 38.4 (11.3)   | *    | 20-20   | Fixed    | 20  | MADRS      | 31.40 |   |                       |                   |               |                         |                  |         |         |  |
|                                  |      |   |   | citalopram     | Yes     | 100 | 39.6 (11.1)   | *    | 40-40   | Fixed    | 40  | MADRS      | 31.00 |   |                       |                   |               |                         |                  |         |         |  |
| Jefferson 2006                   | 2006 | 2 | 2 | placebo        | No      | 139 | 39.8 (*)      | *    | 0-0     | Flexible | 0   | IDS-IVR-30 | 46.00 | 8 | DSM-IV                | North America     | Multi-center  | Secondary/Tertiary care | Outpatients only | Unclear | Yes     |  |
|                                  |      |   |   | bupropion      | Yes     | 135 | 40 (*)        | *    | 300-450 | Flexible | 384 | IDS-IVR-30 | 45.90 |   |                       |                   |               |                         |                  |         |         |  |
| Jiang 2009                       | 2009 | 2 | 2 | escitalopram   | Unclear | 32  | 38.62 (11.54) | 0.56 | 10-20   | Flexible | *   | HAMD 17    | 23.82 | 6 | Other operationalized | Asia              | Single center | Secondary/Tertiary care | Both             | Unclear | Yes     |  |
|                                  |      |   |   | citalopram     | Unclear | 32  | 39.23 (11.9)  | 0.53 | 20-60   | Flexible | *   | HAMD 17    | 23.46 |   |                       |                   |               |                         |                  |         |         |  |

|                                         |      |   |   |               |         |     |                |      |         |          |     |                  |       |    |                       |                   |              |                         |                  |         |         |  |  |
|-----------------------------------------|------|---|---|---------------|---------|-----|----------------|------|---------|----------|-----|------------------|-------|----|-----------------------|-------------------|--------------|-------------------------|------------------|---------|---------|--|--|
| Judd 1993                               | 1993 | 2 | 2 | fluoxetine    | Yes     | 30  | 41.7<br>(9.8)  | 0.66 | 20-20   | Fixed    | 20  | HAMD 17          | 24.40 | 6  | DSM-III-R             | Australia         | Multi-center | Unclear                 | Unclear          | Yes     | Yes     |  |  |
|                                         |      |   |   | amitriptyline | No      | 28  | 41.7<br>(9.8)  | 0.66 | 150-200 | Flexible | 171 | HAMD 17          | 23.70 |    |                       |                   |              |                         |                  |         |         |  |  |
| Kamijima 2013<br>(japicCTI-090733)      | 2013 | 3 | 3 | milnacipran   | Yes     | 303 | 35.9<br>(10.4) | 0.53 | 100-100 | Fixed    | 100 | HAMD 17          | 22.10 | 9  | DSM-IV                | Asia              | Multi-center | Unclear                 | Both             | Yes     | Yes     |  |  |
|                                         |      |   |   | milnacipran   | Yes     | 301 | 36.7<br>(10.5) | 0.51 | 200-200 | Fixed    | 200 | HAMD 17          | 22.30 |    |                       |                   |              |                         |                  |         |         |  |  |
|                                         |      |   |   | paroxetine    | No      | 301 | 36.6<br>(11.1) | 0.55 | 30-40   | Flexible | *   | HAMD 17          | 22.10 |    |                       |                   |              |                         |                  |         |         |  |  |
| Kane 1983                               | 1983 | 2 | 4 | bupropion     | Unclear | 13  | 63.9<br>(6.98) | *    | 100-450 | Flexible | 323 | HAMD unspecified | 24.10 | 4  | Other operationalized | North America     | Multi-center | Unclear                 | Unclear          | Yes     | Unclear |  |  |
|                                         |      |   |   | placebo       | No      | 7   | 63.9<br>(6.98) | *    | 0-0     | Flexible | 0   | HAMD unspecified | 25.60 |    |                       |                   |              |                         |                  |         |         |  |  |
| Kasper 2005a<br>(Study 99024)           | 2005 | 3 | 3 | escitalopram  | Yes     | 174 | 75 (7)         | *    | 10-10   | Fixed    | 10  | MADRS            | 28.20 | 8  | DSM-IV                | Europe            | Multi-center | Both                    | Both             | Yes     | Unclear |  |  |
|                                         |      |   |   | fluoxetine    | No      | 164 | 75 (7)         | *    | 20-20   | Fixed    | 20  | MADRS            | 28.50 |    |                       |                   |              |                         |                  |         |         |  |  |
|                                         |      |   |   | placebo       | No      | 180 | 75 (7)         | *    | 0-0     | Fixed    | 0   | MADRS            | 28.60 |    |                       |                   |              |                         |                  |         |         |  |  |
| Kasper 2005b                            | 2005 | 2 | 2 | paroxetine    | Unclear | 53  | 44.3<br>(11.3) | 0.68 | 20-40   | Flexible | 22  | HAMD 17          | 20.90 | 6  | DSM-IV                | Europe            | Multi-center | Unclear                 | Outpatients only | Yes     | Yes     |  |  |
|                                         |      |   |   | trazodone     | Unclear | 55  | 43.5<br>(12.2) | 0.58 | 150-450 | Flexible | 305 | HAMD 17          | 21.00 |    |                       |                   |              |                         |                  |         |         |  |  |
| Kasper 2012<br>(NCT00807248)            | 2012 | 2 | 4 | escitalopram  | Yes     | 140 | 41.6<br>(12.6) | 0.69 | 20-20   | Fixed    | 20  | MADRS            | 35.40 | 8  | DSM-IV                | Europe            | Multi-center | Secondary/Tertiary care | Both             | Unclear | No      |  |  |
|                                         |      |   |   | placebo       | No      | 71  | 42.6<br>(11.6) | 0.75 | 0-0     | Fixed    | 0   | MADRS            | 34.70 |    |                       |                   |              |                         |                  |         |         |  |  |
| Katona 2012<br>(12541A,<br>NCT00811252) | 2012 | 3 | 3 | placebo       | No      | 145 | 70.3<br>(4.4)  | 0.62 | 0-0     | Fixed    | 0   | HAMD 24          | 29.40 | 8  | DSM-IV                | Cross-Continental | Multi-center | Secondary/Tertiary care | Both             | Unclear | Unclear |  |  |
|                                         |      |   |   | vortioxetine  | Yes     | 156 | 70.5<br>(4.8)  | 0.69 | 5-5     | Fixed    | 5   | HAMD 24          | 29.20 |    |                       |                   |              |                         |                  |         |         |  |  |
|                                         |      |   |   | duloxetine    | No      | 151 | 70.9<br>(5.5)  | 0.66 | 60-60   | Fixed    | 60  | HAMD 24          | 28.50 |    |                       |                   |              |                         |                  |         |         |  |  |
| Katz 1993a                              | 1993 | 2 | 3 | amitriptyline | No      | 95  | 42.6<br>(*)    | *    | 75-150  | Flexible | *   | HAMD 17          | 24.3  | 4  | DSM-III               | Cross-Continental | Unclear      | Unclear                 | Unclear          | Yes     | Yes     |  |  |
|                                         |      |   |   | placebo       | No      | 94  | 44.7<br>(*)    | *    | 0-0     | Flexible | 0   | HAMD 17          | 24.5  |    |                       |                   |              |                         |                  |         |         |  |  |
| Katz 1993b                              | 1993 | 2 | 3 | amitriptyline | No      | 93  | 43.2<br>(*)    | *    | 75-225  | Flexible | *   | HAMD 17          | 23.6  | 4  | DSM-III-R             | Cross-Continental | Unclear      | Unclear                 | Unclear          | Yes     | Yes     |  |  |
|                                         |      |   |   | placebo       | No      | 104 | 44 (*)         | *    | 0-0     | Flexible | 0   | HAMD 17          | 22.2  |    |                       |                   |              |                         |                  |         |         |  |  |
| Katz 2004                               | 2004 | 2 | 3 | paroxetine    | Unclear | 28  | 46 (*)         | *    | 20-60   | Flexible | *   | HAMD 21          | 24.00 | 6  | DSM-III-R             | North America     | Multi-center | Secondary/Tertiary care | Inpatients only  | Yes     | Unclear |  |  |
|                                         |      |   |   | placebo       | No      | 25  | 46 (*)         | *    | 0-0     | Flexible | 0   | HAMD 21          | 25.90 |    |                       |                   |              |                         |                  |         |         |  |  |
| Kavoussi 1997                           | 1997 | 2 | 2 | bupropion     | Yes     | 122 | 39.2<br>(10.3) | 0.48 | 100-300 | Flexible | 238 | HAMD unspecified | *     | 16 | DSM-IV                | North America     | Multi-center | Unclear                 | Outpatients only | No      | Yes     |  |  |
|                                         |      |   |   | sertraline    | No      | 126 | 40<br>(10.5)   | 0.48 | 50-200  | Flexible | 114 | HAMD unspecified | *     |    |                       |                   |              |                         |                  |         |         |  |  |

|                                                                |                 |   |   |               |         |     |                          |      |         |          |     |                     |       |    |                               |                       |                  |                                |                     |         |         |
|----------------------------------------------------------------|-----------------|---|---|---------------|---------|-----|--------------------------|------|---------|----------|-----|---------------------|-------|----|-------------------------------|-----------------------|------------------|--------------------------------|---------------------|---------|---------|
| Keegan 1991                                                    | 1991            | 2 | 2 | fluoxetine    | Yes     | 20  | 39.5<br>(13.6)           | 0.67 | 20-80   | Flexible | 53  | HAMD 21             | *     | 6  | DSM-III                       | North<br>America      | Multi-<br>center | Unclear                        | Unclear             | Yes     | Yes     |
|                                                                |                 |   |   | amitriptyline | No      | 22  | 47.8<br>(14.2)           | 0.67 | 100-250 | Flexible | 171 | HAMD 21             | *     |    |                               |                       |                  |                                |                     |         |         |
| Kellams 1979                                                   | 1979            | 2 | 3 | trazodone     | Unclear | 9   | *                        | *    | 200-600 | Flexible | 515 | HAMD<br>unspecified | 23.50 | 4  | Other operati<br>onalize<br>d | North<br>America      | Single<br>center | Secondary<br>/Tertiary<br>care | Inpatients<br>only  | Yes     | Yes     |
|                                                                |                 |   |   | placebo       | No      | 9   | *                        | *    | 0-0     | Flexible | 0   | HAMD<br>unspecified | 26.90 |    |                               |                       |                  |                                |                     |         |         |
| Keller 2006a<br>(Study 059,<br>NCT00035009)                    | 2006            | 2 | 3 | paroxetine    | No      | 154 | 39 (*)                   | 0.68 | 20-20   | Fixed    | 20  | HAMD 17             | 27.50 | 8  | DSM-IV                        | North<br>America      | Multi-<br>center | Unclear                        | Outpatients<br>only | Unclear | Unclear |
|                                                                |                 |   |   | placebo       | No      | 155 | 41.4<br>(*)              | 0.61 | 0-0     | Fixed    | 0   | HAMD 17             | 27.70 |    |                               |                       |                  |                                |                     |         |         |
| Keller 2006b<br>(Study 061)<br>(NCT00035295)                   | 2006            | 2 | 4 | paroxetine    | No      | 143 | 42.2<br>(*)              | 0.75 | 20-20   | Fixed    | 20  | HAMD 17             | 27.60 | 8  | DSM-IV                        | North<br>America      | Multi-<br>center | Unclear                        | Outpatients<br>only | Unclear | Unclear |
|                                                                |                 |   |   | placebo       | No      | 145 | 41.1<br>(*)              | 0.74 | 0-0     | Fixed    | 0   | HAMD 17             | 27.30 |    |                               |                       |                  |                                |                     |         |         |
| Keller 2006c<br>(Study 062)<br>(NCT00048607)                   | 2006            | 2 | 4 | paroxetine    | No      | 164 | 40.6<br>(*)              | 0.64 | 20-20   | Fixed    | 20  | HAMD 17             | 28.30 | 8  | DSM-IV                        | Cross-<br>Continental | Multi-<br>center | Unclear                        | Outpatients<br>only | Unclear | Unclear |
|                                                                |                 |   |   | placebo       | No      | 161 | 41.3<br>(*)              | 0.71 | 0-0     | Fixed    | 0   | HAMD 17             | 28.30 |    |                               |                       |                  |                                |                     |         |         |
| Keller 2007<br>(NCT00046020)                                   | 2007            | 2 | 2 | fluoxetine    | Unclear | 275 | 40<br>(11.6)             | *    | 20-60   | Flexible | 50  | HAMD 17             | 23.00 | 10 | DSM-IV                        | North<br>America      | Multi-<br>center | Secondary<br>/Tertiary<br>care | Outpatients<br>only | Unclear | No      |
|                                                                |                 |   |   | venlafaxine   | Yes     | 821 | 39.6<br>(11.2)           | *    | 75-300  | Flexible | 208 | HAMD 17             | 22.60 |    |                               |                       |                  |                                |                     |         |         |
| Kennedy 2005<br>(SCT-MD-16)                                    | unpublis<br>hed | 2 | 2 | escitalopram  | Yes     | 102 | 37.1<br>(11.4)           | *    | 10-20   | Flexible | *   | HAMD<br>unspecified | 25.90 | 8  | DSM-IV                        | North<br>America      | Multi-<br>center | Unclear                        | Outpatients<br>only | Unclear | Unclear |
|                                                                |                 |   |   | fluoxetine    | No      | 103 | 37<br>(11.8)             | *    | 20-40   | Flexible | *   | HAMD<br>unspecified | 26.50 |    |                               |                       |                  |                                |                     |         |         |
| Kennedy 2008<br>(CL3-20098-<br>043)                            | 2003            | 2 | 2 | agomelatine   | Yes     | 107 | 42.3<br>(12.7)           | 0.65 | 25-50   | Flexible | *   | HAMD 17             | 26.50 | 6  | DSM-IV                        | Cross-<br>Continental | Multi-<br>center | Secondary<br>/Tertiary<br>care | Both                | No      | No      |
|                                                                |                 |   |   | placebo       | No      | 105 | 42.7<br>(12)             | 0.55 | 0-0     | Flexible | 0   | HAMD 17             | 26.70 |    |                               |                       |                  |                                |                     |         |         |
| Kennedy 2014<br>(EudraCT 2009-<br>011238-84,<br>CL3-20098-069) | 2014            | 3 | 4 | agomelatine   | Yes     | 138 | 46.5<br>(11.9)           | 0.65 | 25-25   | Fixed    | 25  | HAMD 17             | 26.70 | 6  | DSM-IV                        | Cross-<br>Continental | Multi-<br>center | Unclear                        | Outpatients<br>only | Unclear | No      |
|                                                                |                 |   |   | agomelatine   | Yes     | 137 | 43.1<br>(12.6)           | 0.72 | 25-50   | Flexible | *   | HAMD 17             | 26.70 |    |                               |                       |                  |                                |                     |         |         |
|                                                                |                 |   |   | placebo       | No      | 141 | 45<br>(13.1)             | 0.77 | 0-0     | Flexible | 0   | HAMD 17             | 26.60 |    |                               |                       |                  |                                |                     |         |         |
| Kerkhofs 1990                                                  | 1990            | 2 | 2 | fluoxetine    | Yes     | 16  | 45.3<br>(12.7)           | 0.69 | 60-60   | Fixed    | 60  | HAMD<br>unspecified | 21.90 | 6  | RDC                           | Europe                | Unclear          | Unclear                        | Other/Unclea<br>r   | Yes     | Yes     |
|                                                                |                 |   |   | amitriptyline | No      | 18  | 46.2<br>(11.4)           | 0.61 | 150-150 | Fixed    | 150 | HAMD<br>unspecified | 21.80 |    |                               |                       |                  |                                |                     |         |         |
| Kerr 1984                                                      | 1984            | 2 | 2 | amitriptyline | No      | 38  | 62.5(<br>media<br>n) (*) | 0.62 | 75-225  | Flexible | *   | HAMD 17             | 19.00 | 6  | Other operati<br>onalize<br>d | Europe                | Multi-<br>center | Secondary<br>/Tertiary<br>care | Both                | Unclear | Unclear |
|                                                                |                 |   |   | trazodone     | Yes     | 36  | 59<br>(medi<br>an) (*)   | 0.76 | 150-300 | Flexible | *   | HAMD 17             | 20.00 |    |                               |                       |                  |                                |                     |         |         |
| Khan 1998                                                      | 1998            | 4 | 4 | venlafaxine   | Yes     | 85  | 43.3<br>(*)              | 0.68 | 75-75   | Fixed    | 75  | HAMD 21             | 24.30 | 12 | DSM-<br>III-R                 | North<br>America      | Multi-<br>center | Unclear                        | Outpatients<br>only | yes     | unclear |



|                                                  |      |   |   |               |         |     |                |      |         |          |     |                     |       |   |                                  |                  |                  |                                |                     |         |         |
|--------------------------------------------------|------|---|---|---------------|---------|-----|----------------|------|---------|----------|-----|---------------------|-------|---|----------------------------------|------------------|------------------|--------------------------------|---------------------|---------|---------|
|                                                  |      |   |   | venlafaxine   | Yes     | 90  | 40 (*)         | 0.64 | 150-150 | Fixed    | 150 | HAMD 21             | 24.50 |   |                                  |                  |                  |                                |                     |         |         |
|                                                  |      |   |   | venlafaxine   | Yes     | 83  | 43.6 (*)       | 0.60 | 200-200 | Fixed    | 200 | HAMD 21             | 24.80 |   |                                  |                  |                  |                                |                     |         |         |
|                                                  |      |   |   | placebo       | No      | 95  | 40.2 (*)       | 0.61 | 0-0     | Fixed    | 0   | HAMD 21             | 25.10 |   |                                  |                  |                  |                                |                     |         |         |
| Khan 2007<br>(SCT-MD-23,<br>NCT00108979)         | 2007 | 2 | 2 | escitalopram  | Yes     | 140 | 41.8<br>(12.7) | *    | 10-20   | Flexible | *   | HAMD 24             | 26.60 | 8 | DSM-IV                           | North<br>America | Multi-<br>center | Unclear                        | Outpatients<br>only | Unclear | Unclear |
|                                                  |      |   |   | duloxetine    | No      | 138 | 43<br>(13.4)   | *    | 60-60   | Fixed    | 60  | HAMD 24             | 26.90 |   |                                  |                  |                  |                                |                     |         |         |
| Khan 2011<br>(CLDA-07-DP-<br>02,<br>NCT00683592) | 2011 | 2 | 2 | vilazodone    | Yes     | 240 | 41.1<br>(12.2) | *    | 40-40   | Fixed    | 40  | HAMD 17             | 25.00 | 8 | DSM-IV                           | North<br>America | Multi-<br>center | Other/Unclear                  | Other/Unclear       | Unclear | Unclear |
|                                                  |      |   |   | placebo       | No      | 241 | 42.4<br>(12.5) | *    | 0-0     | Fixed    | 0   | HAMD 17             | 25.30 |   |                                  |                  |                  |                                |                     |         |         |
| Kiev 1997                                        | 1997 | 2 | 2 | fluvoxamine   | Yes     | 30  | 42.7<br>(*)    | *    | 50-150  | Flexible | 102 | HAMD 21             | 24.40 | 7 | DSM-<br>III-R                    | North<br>America | Multi-<br>center | Secondary<br>/Tertiary<br>care | Outpatients<br>only | Yes     | Yes     |
|                                                  |      |   |   | paroxetine    | No      | 30  | 39.9<br>(*)    | *    | 20-50   | Flexible | 36  | HAMD 21             | 24.40 |   |                                  |                  |                  |                                |                     |         |         |
| Kinoshita 2009                                   | 2009 | 4 | 4 | mirtazapine   | Yes     | 70  | 39.4<br>(10.9) | *    | 15-15   | Fixed    | 15  | HAMD 17             | 23.20 | 6 | DSM-IV                           | Asia             | Multi-<br>center | Both                           | Both                | No      | No      |
|                                                  |      |   |   | mirtazapine   | Yes     | 70  | 37.7<br>(10.8) | *    | 30-30   | Fixed    | 30  | HAMD 17             | 22.50 |   |                                  |                  |                  |                                |                     |         |         |
|                                                  |      |   |   | mirtazapine   | Yes     | 71  | 41.6<br>(12.5) | *    | 45-45   | Fixed    | 45  | HAMD 17             | 22.10 |   |                                  |                  |                  |                                |                     |         |         |
|                                                  |      |   |   | placebo       | No      | 70  | 39.9<br>(12.8) | *    | 0-0     | Fixed    | 0   | HAMD 17             | 22.50 |   |                                  |                  |                  |                                |                     |         |         |
| Koshino 2013<br>(NCT01138007)                    | 2013 | 2 | 3 | bupropion     | Yes     | 192 | 37.5<br>(10.9) | 0.56 | 300-300 | Fixed    | 300 | MADRS               | 32.10 | 8 | DSM-IV                           | Asia             | Multi-<br>center | Secondary<br>/Tertiary<br>care | Other/Unclear       | Unclear | Unclear |
|                                                  |      |   |   | placebo       | No      | 187 | 37.9<br>(11.1) | 0.54 | 0-0     | Fixed    | 0   | MADRS               | 31.90 |   |                                  |                  |                  |                                |                     |         |         |
| Kramer 1998                                      | 1998 | 2 | 3 | paroxetine    | Unclear | 72  | *              | *    | 20-20   | Fixed    | 20  | HAMD 21             | *     | 6 | DSM-IV                           | North<br>America | Multi-<br>center | Other/Unclear                  | Outpatients<br>only | Unclear | Unclear |
|                                                  |      |   |   | placebo       | No      | 70  | *              | *    | 0-0     | Fixed    | 0   | HAMD 24             | *     |   |                                  |                  |                  |                                |                     |         |         |
| Kuhs 1989<br>(MDUK_29060-<br>III_85_043)         | 1989 | 2 | 2 | paroxetine    | Yes     | 12  | 39.2<br>(11.8) | 0.9  | 30-30   | Fixed    | 30  | HAMD 21             | 24.60 | 6 | DSM-III                          | Europe           | Single<br>center | Other/Unclear                  | Other/Unclear       | Yes     | Unclear |
|                                                  |      |   |   | amitriptyline | No      | 12  | 39.1<br>(11.5) | 1.0  | 150-150 | Fixed    | 150 | HAMD 21             | 25.00 |   |                                  |                  |                  |                                |                     |         |         |
| Kusalic 1993                                     | 1993 | 2 | 3 | amitriptyline | No      | 13  | 41.3<br>(10.1) | *    | *.*     | Flexible | 110 | HAMD 17             | *     | 6 | DSM-<br>III-R                    | North<br>America | Unclear          | Secondary<br>/Tertiary<br>care | Outpatients<br>only | Yes     | Unclear |
|                                                  |      |   |   | placebo       | No      | 15  | 41.3<br>(10.1) | *    | 0-0     | Flexible | 0   | HAMD 17             | *     |   |                                  |                  |                  |                                |                     |         |         |
| Kyle 1998<br>(Study 92032 -<br>FDA)              | 1998 | 2 | 2 | citalopram    | Yes     | 179 | 73.4<br>(*)    | 0.73 | 20-40   | Flexible | 24  | MADRS               | 27.8  | 8 | DSM-<br>III-R                    | Europe           | Multi-<br>center | Primary<br>care                | Other/Unclear       | Yes     | Unclear |
|                                                  |      |   |   | amitriptyline | No      | 186 | 74.1<br>(*)    | 0.74 | 50-100  | Flexible | 57  | MADRS               | 29.4  |   |                                  |                  |                  |                                |                     |         |         |
| Laakman 1988                                     | 1988 | 2 | 2 | fluoxetine    | Unclear | 63  | *              | *    | 20-60   | Flexible | *   | HAMD<br>unspecified | 26.7  | 5 | Other<br>operati<br>onalize<br>d | Europe           | Unclear          | Other/Unclear                  | Outpatients<br>only | Yes     | Yes     |

|                                                                    |      |   |   |               |         |     |             |      |         |          |     |                  |       |    |           |                   |               |                         |                  |         |         |
|--------------------------------------------------------------------|------|---|---|---------------|---------|-----|-------------|------|---------|----------|-----|------------------|-------|----|-----------|-------------------|---------------|-------------------------|------------------|---------|---------|
|                                                                    |      |   |   | amitriptyline | Unclear | 65  | *           | *    | 50-150  | Flexible | *   | HAMD unspecified | 23.8  |    |           |                   |               |                         |                  |         |         |
| Lalit 2004                                                         | 2004 | 3 | 3 | escitalopram  | Yes     | 69  | 33 (8)      | *    | 10-20   | Flexible | *   | HAMD 17          | 26.00 | 4  | ICD-10    | Asia              | Multi-center  | Other/Unclear           | Outpatients only | No      | Yes     |
|                                                                    |      |   |   | citalopram    | Yes     | 74  | 33 (9)      | *    | 20-40   | Flexible | *   | HAMD 17          | 25.00 |    |           |                   |               |                         |                  |         |         |
|                                                                    |      |   |   | sertraline    | No      | 71  | 37 (11)     | *    | 100-150 | Flexible | *   | HAMD 17          | 25.00 |    |           |                   |               |                         |                  |         |         |
| Lam 1995                                                           | 1995 | 2 | 2 | fluoxetine    | Yes     | 36  | 40.9 (8.6)  | *    | 20-20   | Fixed    | 20  | HAMD 21          | 18.70 | 5  | DSM-III-R | North America     | Multi-center  | Secondary/Tertiary care | Outpatients only | Yes     | No      |
|                                                                    |      |   |   | placebo       | No      | 32  | 38.1 (9.7)  | *    | 0-0     | Fixed    | 0   | HAMD 21          | 18.30 |    |           |                   |               |                         |                  |         |         |
| Langlois 1985                                                      | 1985 | 2 | 3 | amitriptyline | No      | 15  | *           | *    | 150-225 | Flexible | *   | HAMD 17          | *     | 4  | DSM-III   | North America     | Single center | Secondary/Tertiary care | Outpatients only | No      | Unclear |
|                                                                    |      |   |   | placebo       | No      | 15  | *           | *    | 0-0     | Flexible | 0   | HAMD 17          | *     |    |           |                   |               |                         |                  |         |         |
| Lapierre 1980                                                      | 1980 | 2 | 2 | amitriptyline | Unclear | 20  | *           | *    | 150-150 | Fixed    | 150 | *                | *     | 4  | Feighner  | North America     | Unclear       | Secondary/Tertiary care | Both             | Yes     | Unclear |
|                                                                    |      |   |   | trazodone     | Unclear | 20  | *           | *    | 150-150 | Fixed    | 150 | *                | *     |    |           |                   |               |                         |                  |         |         |
| Lapierre 1987                                                      | 1987 | 2 | 3 | fluvoxamine   | Yes     | 22  | 43.3 (*)    | *    | 150-300 | Flexible | 207 | HAMD 17          | 24.84 | 6  | DSM-III   | North America     | Multi-center  | Secondary/Tertiary care | Inpatients only  | Yes     | Unclear |
|                                                                    |      |   |   | placebo       | No      | 20  | 45.8 (*)    | *    | 0-0     | Flexible | 0   | HAMD 17          | 21.98 |    |           |                   |               |                         |                  |         |         |
| Larsen 1989                                                        | 1989 | 2 | 3 | clomipramine  | Unclear | 20  | 48 (*)      | 0.65 | 75-150  | Fixed    | 150 | HAMD 17          | 17.80 | 6  | DSM-III   | Europe            | Unclear       | Other/Unclear           | Both             | Unclear | Yes     |
|                                                                    |      |   |   | placebo       | No      | 18  | 57 (*)      | 0.67 | 0-0     | Fixed    | 0   | HAMD 17          | 18.30 |    |           |                   |               |                         |                  |         |         |
| Learned 2012a Study1 (EUCTR2005-003401-87, SND103285, NCT00448058) | 2012 | 2 | 3 | venlafaxine   | No      | 134 | 43 (11.19)  | 0.61 | 150-225 | Flexible | *   | HAMD 17          | *     | 10 | DSM-IV    | Cross-Continental | Multi-center  | Other/Unclear           | Outpatients only | Unclear | Unclear |
|                                                                    |      |   |   | Placebo       | No      | 126 | 41.9 (11.8) | 0.64 | 0-0     | Flexible | 0   | HAMD 17          | *     |    |           |                   |               |                         |                  |         |         |
| Learned 2012b Study2 (NCT00420641)                                 | 2012 | 2 | 3 | paroxetine    | Yes     | 166 | 44.4 (10.9) | 0.33 | 30-30   | Fixed    | 30  | MADRS            | 30.30 | 10 | DSM-IV    | Cross-Continental | Multi-center  | Other/Unclear           | Outpatients only | Unclear | Unclear |
|                                                                    |      |   |   | placebo       | No      | 156 | 41.8 (10.9) | 0.25 | 0-0     | Fixed    | 0   | MADRS            | 31.80 |    |           |                   |               |                         |                  |         |         |
| Leclubier 1997                                                     | 1997 | 2 | 3 | venlafaxine   | Unclear | 78  | 38.3 (*)    | 0.71 | 75-150  | Flexible | 128 | MADRS            | 24.90 | 13 | RDC       | Europe            | Multi-center  | Other/Unclear           | Outpatients only | Yes     | Yes     |
|                                                                    |      |   |   | placebo       | No      | 76  | 40.5 (*)    | 0.63 | 0-0     | Flexible | 0   | MADRS            | 24.20 |    |           |                   |               |                         |                  |         |         |
| Lee 2007 (F1J-AA-HMCV) (NCT00489775)                               | 2007 | 2 | 2 | duloxetine    | Yes     | 238 | 39 (13.9)   | *    | 60-60   | Fixed    | 60  | HAMD 17          | 21.10 | 8  | DSM-IV    | *                 | Multi-center  | Secondary/Tertiary care | Both             | No      | Unclear |
|                                                                    |      |   |   | paroxetine    | No      | 240 | 38 (15.3)   | *    | 20-20   | Fixed    | 20  | HAMD 17          | 21.20 |    |           |                   |               |                         |                  |         |         |
| Leinonen 1997                                                      | 1997 | 2 | 2 | milnacipran   | Yes     | 52  | 49.2 (9.8)  | *    | 100-200 | Flexible | *   | HAMD 17          | 23.70 | 26 | DSM-III-R | Europe            | Multi-center  | Secondary/Tertiary care | Both             | Unclear | Yes     |
|                                                                    |      |   |   | clomipramine  | No      | 55  | 47.1 (10.6) | *    | 75-150  | Flexible | *   | HAMD 17          | 23.10 |    |           |                   |               |                         |                  |         |         |

|                                                                              |      |   |   |                |         |     |                |      |         |          |     |                  |       |    |                       |                   |               |                         |                  |         |         |  |  |
|------------------------------------------------------------------------------|------|---|---|----------------|---------|-----|----------------|------|---------|----------|-----|------------------|-------|----|-----------------------|-------------------|---------------|-------------------------|------------------|---------|---------|--|--|
| Leinonen 1999<br>(Agren1995)                                                 | 1999 | 2 | 2 | mirtazapine    | Yes     | 137 | 42.1<br>(12.3) | *    | 15-60   | Flexible | 35  | MADRS            | 29.60 | 8  | DSM-IV                | Europe            | Multi-center  | Secondary/Tertiary care | Both             | Yes     | Yes     |  |  |
|                                                                              |      |   |   | citalopram     | No      | 133 | 41.1<br>(10.8) | *    | 20-60   | Flexible | 37  | MADRS            | 29.10 |    |                       |                   |               |                         |                  |         |         |  |  |
| Lemoine 2007<br>(CL3-20098-035)                                              | 2004 | 2 | 4 | agomelatine    | Yes     | 165 | 40.7<br>(10.7) | 0.75 | 25-50   | Fixed    | 50  | HAMD 17          | 25.90 | 24 | DSM-IV                | Europe            | Multi-center  | Primary care            | Outpatients only | No      | No      |  |  |
|                                                                              |      |   |   | venlafaxine    | No      | 167 | 39.6<br>(10.3) | 0.67 | 75-150  | Fixed    | 150 | HAMD 17          | 26.00 |    |                       |                   |               |                         |                  |         |         |  |  |
| Lepine 2000                                                                  | 2000 | 2 | 2 | sertraline     | Yes     | 82  | 42.3<br>(*)    | 0.71 | 50-200  | Flexible | 114 | HAMD 17          | 29.8  | 8  | DSM-III-R             | Cross-Continental | Multi-center  | Secondary/Tertiary care | Outpatients only | Yes     | Yes     |  |  |
|                                                                              |      |   |   | clomipramine   | No      | 84  | 41.8<br>(*)    | 0.69 | 50-150  | Flexible | 98  | HAMD 17          | 29.6  |    |                       |                   |               |                         |                  |         |         |  |  |
| Lepola 2003<br>(ESC 99003)                                                   | 2001 | 3 | 3 | escitalopram   | Yes     | 156 | 43<br>(11)     | *    | 10-20   | Flexible | *   | MADRS            | 29.00 | 8  | DSM-IV                | Cross-Continental | Multi-center  | Primary care            | Outpatients only | Yes     | Unclear |  |  |
|                                                                              |      |   |   | citalopram     | No      | 161 | 44<br>(11)     | *    | 20-40   | Flexible | *   | MADRS            | 29.20 |    |                       |                   |               |                         |                  |         |         |  |  |
|                                                                              |      |   |   | placebo        | No      | 154 | 43<br>(12)     | *    | 0-0     | Flexible | 0   | MADRS            | 28.70 |    |                       |                   |               |                         |                  |         |         |  |  |
| Li 2006                                                                      | 2006 | 2 | 2 | escitalopram   | Unclear | 28  | 36.5<br>(12.8) | 0.55 | 10-20   | Flexible | *   | HAMD 17          | 23.70 | 6  | Other operationalized | Asia              | Single center | Secondary/Tertiary care | Outpatients only | Unclear | Yes     |  |  |
|                                                                              |      |   |   | citalopram     | Unclear | 28  | 34.4<br>(11.9) | 0.53 | 20-40   | Flexible | *   | HAMD 17          | 23.80 |    |                       |                   |               |                         |                  |         |         |  |  |
| Li 2010                                                                      | 2010 | 2 | 2 | escitalopram   | Yes     | 24  | *              | *    | 10-20   | Flexible | *   | HAMD unspecified | *     | 6  | Other operationalized | Asia              | Multi-center  | Other/Unclear           | Other/Unclear    | Unclear | Unclear |  |  |
|                                                                              |      |   |   | citalopram     | Yes     | 24  | *              | *    | 20-40   | Flexible | *   | HAMD unspecified | *     |    |                       |                   |               |                         |                  |         |         |  |  |
| Lieberman 2008a (Study 309, EUCTR2004-000562-13, 3151A1-309-EU, NCT00090649) | 2008 | 2 | 3 | placebo        | No      | 120 | 45.4<br>(12)   | 0.67 | 0-0     | Flexible | 0   | HAMD 17          | *     | 8  | DSM-IV                | Europe            | Multi-center  | Other/Unclear           | Outpatients only | Unclear | Unclear |  |  |
|                                                                              |      |   |   | venlafaxine    | Yes     | 127 | 45.9<br>(12)   | 0.72 | 75-150  | Flexible | *   | HAMD 17          | 25.8  |    |                       |                   |               |                         |                  |         |         |  |  |
| Lieberman 2008b (Study 317)                                                  | 2008 | 2 | 3 | placebo        | No      | 125 | 39.5<br>(11.4) | 0.64 | 0-0     | Flexible | 0   | HAMD 17          | *     | 8  | DSM-IV                | North America     | Multi-center  | Other/Unclear           | Outpatients only | Unclear | Unclear |  |  |
|                                                                              |      |   |   | venlafaxine    | Yes     | 117 | 41.5<br>(11.6) | 0.70 | 150-225 | Flexible | *   | HAMD 17          | 25.1  |    |                       |                   |               |                         |                  |         |         |  |  |
| Liebowitz 2008 (Study 332, NCT00277823)                                      | 2008 | 3 | 3 | desvenlafaxine | Yes     | 151 | 43<br>(15)     | 0.62 | 50-50   | Fixed    | 50  | HAMD 17          | 23.37 | 8  | DSM-IV                | North America     | Multi-center  | Other/Unclear           | Outpatients only | Unclear | Yes     |  |  |
|                                                                              |      |   |   | desvenlafaxine | Yes     | 148 | 43<br>(13)     | 0.53 | 100-100 | Fixed    | 100 | HAMD 17          | 23.35 |    |                       |                   |               |                         |                  |         |         |  |  |
|                                                                              |      |   |   | placebo        | No      | 152 | 42<br>(14)     | 0.63 | 0-0     | Fixed    | 0   | HAMD 17          | 23.02 |    |                       |                   |               |                         |                  |         |         |  |  |
| Liebowitz 2013 (NCT00863798)                                                 | 2013 | 2 | 3 | desvenlafaxine | Yes     | 227 | 43<br>(14)     | 0.60 | 50-50   | Fixed    | 50  | HAMD 17          | 23    | 8  | DSM-IV                | North America     | Multi-center  | Both                    | Outpatients only | Yes     | Unclear |  |  |

|                                         |             |   |   |               |         |     |                 |      |         |          |     |                  |       |    |                       |               |               |                         |                  |         |         |
|-----------------------------------------|-------------|---|---|---------------|---------|-----|-----------------|------|---------|----------|-----|------------------|-------|----|-----------------------|---------------|---------------|-------------------------|------------------|---------|---------|
|                                         |             |   |   | placebo       | No      | 227 | 42<br>(13)      | 0.62 | 0-0     | Fixed    | 0   | HAMD 17          | 23    |    |                       |               |               |                         |                  |         |         |
| Lineberry 1990<br>(WELL 84A)            | 1990        | 2 | 2 | bupropion     | Yes     | 112 | 41.9<br>(*)     | *    | 300-300 | Fixed    | 300 | HAMD 21          | 26.54 | 6  | DSM-III-R             | North America | Multi-center  | Secondary/Tertiary care | Outpatients only | Yes     | Yes     |
|                                         |             |   |   | placebo       | No      | 112 | 40.8<br>(*)     | *    | 0-0     | Fixed    | 0   | HAMD 21          | 27.02 |    |                       |               |               |                         |                  |         |         |
| Loo 2002<br>(CL2-014)                   | 2002        | 3 | 5 | agomelatine   | Yes     | 137 | 42.3<br>(*)     | 0.67 | 25-25   | Fixed    | 25  | HAMD 17          | 27.40 | 8  | DSM-IV                | Europe        | Multi-center  | Both                    | Other/Unclear    | Yes     | Yes     |
|                                         |             |   |   | placebo       | No      | 139 | 42.3<br>(*)     | 0.67 | 0-0     | Fixed    | 0   | HAMD 17          | 27.40 |    |                       |               |               |                         |                  |         |         |
|                                         |             |   |   | paroxetine    | No      | 147 | 42.3<br>(*)     | 0.67 | 20-20   | Fixed    | 20  | HAMD 17          | 27.30 |    |                       |               |               |                         |                  |         |         |
| LopezRodriguez 2004                     | 2004        | 2 | 4 | fluoxetine    | Unclear | 10  | 31.9<br>(*)     | *    | 20-20   | Fixed    | 20  | HAMD 21          | 17.27 | 20 | DSM-IV                | South America | Single center | Primary care            | Outpatients only | No      | Unclear |
|                                         |             |   |   | placebo       | No      | 10  | 31.9<br>(*)     | *    | 0-0     | Fixed    | 0   | HAMD 21          | 17.27 |    |                       |               |               |                         |                  |         |         |
| Lv 2013                                 | 2013        | 2 | 2 | escitalopram  | Unclear | 20  | 32.1<br>(7.64)  | 0.50 | 10-20   | Flexible | *   | HAMD 17          | 23.06 | 6  | Other operationalized | Asia          | Single center | Secondary/Tertiary care | Outpatients only | Unclear | Yes     |
|                                         |             |   |   | citalopram    | Unclear | 22  | 31.61<br>(8.61) | 0.50 | 20-40   | Flexible | *   | HAMD 17          | 22.78 |    |                       |               |               |                         |                  |         |         |
| Lydiard 1989                            | 1989        | 2 | 3 | fluvoxamine   | Yes     | 18  | 47.2<br>(*)     | *    | 100-300 | Flexible | 240 | HAMD unspecified | 24.50 | 6  | DSM-III               | North America | Single center | Secondary/Tertiary care | Outpatients only | Yes     | Unclear |
|                                         |             |   |   | placebo       | No      | 18  | 47.2<br>(*)     | *    | 0-0     | Flexible | 0   | HAMD unspecified | 26.00 |    |                       |               |               |                         |                  |         |         |
| Lydiard 1997                            | 1997        | 3 | 3 | amitriptyline | No      | 131 | 39(*)           | *    | 50-150  | Flexible | 103 | HAMD 17          | 22.1  | 8  | DSM-III-R             | North America | Multi-center  | Other/Unclear           | Outpatients only | Yes     | Yes     |
|                                         |             |   |   | placebo       | No      | 129 | 40.2<br>(*)     | *    | 0-0     | Flexible | 0   | HAMD 17          | 22.1  |    |                       |               |               |                         |                  |         |         |
|                                         |             |   |   | sertraline    | No      | 132 | 41.2<br>(*)     | *    | 50-200  | Flexible | 139 | HAMD 17          | 21.5  |    |                       |               |               |                         |                  |         |         |
| M/2020/0046<br>(Study 046)              | unpublished | 3 | 3 | reboxetine    | Yes     | 265 | 39.9<br>(11.1)  | 0.71 | 8-10    | Flexible | 9   | HAMD 21          | 23.00 | 8  | DSM-IV                | North America | Multi-center  | Other/Unclear           | Other/Unclear    | No      | Yes     |
|                                         |             |   |   | placebo       | No      | 257 | 39<br>(11.6)    | 0.70 | 0-0     | Flexible | 0   | HAMD 21          | 23.00 |    |                       |               |               |                         |                  |         |         |
|                                         |             |   |   | paroxetine    | No      | 265 | 39.8<br>(11.8)  | 0.69 | 20-40   | Flexible | 29  | HAMD 21          | 22.80 |    |                       |               |               |                         |                  |         |         |
| M/2020/0047<br>(Study 047)              | unpublished | 3 | 3 | reboxetine    | Yes     | 258 | 39.3<br>(11.6)  | 0.74 | 8-10    | Flexible | 9   | HAMD 21          | 24.20 | 8  | DSM-IV                | North America | Multi-center  | Other/Unclear           | Other/Unclear    | No      | Yes     |
|                                         |             |   |   | placebo       | No      | 254 | 37.1<br>(11)    | 0.82 | 0-0     | Flexible | 0   | HAMD 21          | 23.70 |    |                       |               |               |                         |                  |         |         |
|                                         |             |   |   | paroxetine    | No      | 262 | 39.8<br>(10.8)  | 0.72 | 20-40   | Flexible | 33  | HAMD 21          | 23.90 |    |                       |               |               |                         |                  |         |         |
| Mahableshwar 2013 (304,<br>NCT00672620) | 2013        | 3 | 4 | placebo       | No      | 153 | 42.6<br>(13.7)  | 0.61 | 0-0     | Fixed    | 0   | HAMD 24          | 29.50 | 8  | DSM-IV                | North America | Multi-center  | Other/Unclear           | Other/Unclear    | Unclear | Unclear |
|                                         |             |   |   | vortioxetine  | Yes     | 153 | 43.1<br>(13.9)  | 0.69 | 5-5     | Fixed    | 5   | HAMD 24          | 29.80 |    |                       |               |               |                         |                  |         |         |
|                                         |             |   |   | duloxetine    | No      | 152 | 42.7<br>(14.4)  | 0.60 | 60-60   | Fixed    | 60  | HAMD 24          | 28.70 |    |                       |               |               |                         |                  |         |         |
|                                         | 2015        | 4 | 4 | placebo       | No      | 161 | 42.4<br>(12.6)  | 0.72 | 0-0     | Fixed    | 0   | MADRS            | 31.60 | 8  | DSM-IV                | North America | Multi-center  | Other/Unclear           | Other/Unclear    | Unclear | No      |

|                                       |      |   |   |               |         |     |                |      |         |          |     |                  |       |    |           |                   |               |                         |                  |         |         |
|---------------------------------------|------|---|---|---------------|---------|-----|----------------|------|---------|----------|-----|------------------|-------|----|-----------|-------------------|---------------|-------------------------|------------------|---------|---------|
| Mahableshwar 2015a (315, NCT01153009) |      |   |   | vortioxetine  | Yes     | 147 | 43.1<br>(12.3) | 0.71 | 15-15   | Fixed    | 15  | MADRS            | 31.90 |    |           |                   |               |                         |                  |         |         |
|                                       |      |   |   | vortioxetine  | Yes     | 154 | 42.8<br>(12.4) | 0.74 | 20-20   | Fixed    | 20  | MADRS            | 32.00 |    |           |                   |               |                         |                  |         |         |
|                                       |      |   |   | duloxetine    | No      | 152 | 43.4<br>(12.2) | 0.78 | 60-60   | Fixed    | 60  | MADRS            | 32.90 |    |           |                   |               |                         |                  |         |         |
| Mahableshwar 2015b (317, NCT01179516) | 2015 | 3 | 3 | placebo       | No      | 160 | 46.2<br>(11.8) | 0.68 | 0-0     | Fixed    | 0   | MADRS            | 33.40 | 8  | DSM-IV    | North America     | Multi-center  | Other/Unclear           | Other/Unclear    | Unclear | Unclear |
|                                       |      |   |   | vortioxetine  | Yes     | 157 | 45.2<br>(11.9) | 0.72 | 10-10   | Fixed    | 10  | MADRS            | 34.10 |    |           |                   |               |                         |                  |         |         |
|                                       |      |   |   | vortioxetine  | Yes     | 152 | 43.8<br>(13.5) | 0.71 | 15-15   | Fixed    | 15  | MADRS            | 33.70 |    |           |                   |               |                         |                  |         |         |
| Mahableshwar 2015c (NCT01564862)      | 2015 | 3 | 3 | vortioxetine  | Yes     | 198 | 44.2<br>(12.2) | 0.68 | 10-20   | Flexible | 16  | MADRS            | 31.40 | 8  | DSM-IV    | Cross-Continental | Multi-center  | Secondary/Tertiary care | Both             | Unclear | Unclear |
|                                       |      |   |   | duloxetine    | No      | 210 | 45.7<br>(11.5) | 0.66 | 60-60   | Fixed    | 60  | MADRS            | 31.70 |    |           |                   |               |                         |                  |         |         |
|                                       |      |   |   | placebo       | No      | 194 | 45<br>(12.1)   | 0.61 | 0-0     | Fixed    | 0   | MADRS            | 31.90 |    |           |                   |               |                         |                  |         |         |
| Mann 1981                             | 1981 | 2 | 3 | trazodone     | Yes     | 10  | 44.5<br>(3.9)  | 0.10 | 200-600 | Flexible | 418 | HAMD unspecified | 26.30 | 4  | Feighner  | North America     | Single center | Secondary/Tertiary care | Outpatients only | Yes     | Unclear |
|                                       |      |   |   | placebo       | No      | 10  | 47.2<br>(4.1)  | 0.11 | 0-0     | Flexible | 0   | HAMD unspecified | 22.90 |    |           |                   |               |                         |                  |         |         |
| Manna 1989                            | 1989 | 2 | 2 | fluoxetine    | Unclear | 15  | 47.7<br>(10)   | 0.63 | 20-20   | Fixed    | 20  | HAMD 17          | 25.7  | 5  | DSM-III   | Europe            | Unclear       | Secondary/Tertiary care | Inpatients only  | Unclear | Unclear |
|                                       |      |   |   | clomipramine  | Unclear | 15  | 48.5<br>(8.36) | 0.63 | 75-75   | Fixed    | 75  | HAMD 17          | 25    |    |           |                   |               |                         |                  |         |         |
| Mao 2008                              | 2008 | 2 | 2 | fluoxetine    | No      | 117 | 40.7<br>(13.9) | 0.74 | 20-20   | Fixed    | 20  | HAMD 17          | 24.10 | 8  | DSM-IV    | Asia              | Multi-center  | Secondary/Tertiary care | Both             | No      | Yes     |
|                                       |      |   |   | escitalopram  | Yes     | 123 | 37.1<br>(14.1) | 0.61 | 10-10   | Fixed    | 10  | HAMD 17          | 24.70 |    |           |                   |               |                         |                  |         |         |
| Mao 2015 (NCT01098318)                | 2015 | 2 | 3 | sertraline    | No      | 19  | 41.4<br>(14.6) | 0.53 | 50-200  | Flexible | *   | HAMD 17          | 15.40 | 12 | DSM-IV    | North America     | Single center | Primary care            | Outpatients only | Unclear | Unclear |
|                                       |      |   |   | placebo       | No      | 18  | 46.7<br>(15.2) | 0.44 | 0-0     | Fixed    | 0   | HAMD 17          | 14.40 |    |           |                   |               |                         |                  |         |         |
| March 1990                            | 1990 | 2 | 3 | fluvoxamine   | Yes     | 18  | 39.4<br>(*)    | *    | 100-300 | Flexible | *   | HAMD unspecified | 25.10 | 6  | DSM-III   | North America     | Single center | Secondary/Tertiary care | Outpatients only | Yes     | Unclear |
|                                       |      |   |   | placebo       | No      | 18  | 39.4<br>(*)    | *    | 0-0     | Flexible | 0   | HAMD unspecified | 27.30 |    |           |                   |               |                         |                  |         |         |
| Marchesi 1998                         | 1998 | 2 | 2 | fluoxetine    | Yes     | 67  | 43.6<br>(11.9) | 0.73 | 20-20   | Fixed    | 20  | HAMD 17          | 25.50 | 10 | DSM-III-R | Europe            | Multi-center  | Secondary/Tertiary care | Outpatients only | Yes     | Yes     |
|                                       |      |   |   | amitriptyline | No      | 75  | 43.6<br>(11.9) | 0.75 | 75-225  | Flexible | 115 | HAMD 17          | 25.30 |    |           |                   |               |                         |                  |         |         |
| Masco 1985                            | 1985 | 2 | 2 | fluoxetine    | Yes     | 21  | 51 (*)         | 0.65 | 40-80   | Flexible | *   | HAMD unspecified | *     | 6  | *         | North America     | Unclear       | Secondary/Tertiary care | Outpatients only | Unclear | Unclear |
|                                       |      |   |   | amitriptyline | No      | 21  | 51 (*)         | 0.81 | 150-300 | Flexible | *   | HAMD unspecified | *     |    |           |                   |               |                         |                  |         |         |
| Mathews 2015 (NCT01473381)            | 2015 | 4 | 4 | vilazodone    | Yes     | 292 | 41.7<br>(12.7) | 0.58 | 20-20   | Fixed    | 17  | MADRS            | 31.00 | 10 | DSM-IV    | North America     | Multi-center  | Other/Unclear           | Outpatients only | Unclear | Yes     |

|                                                                            |                 |   |   |              |     |     |                |      |         |          |     |         |       |    |          |                   |               |                         |                  |         |         |
|----------------------------------------------------------------------------|-----------------|---|---|--------------|-----|-----|----------------|------|---------|----------|-----|---------|-------|----|----------|-------------------|---------------|-------------------------|------------------|---------|---------|
|                                                                            |                 |   |   | vilazodone   | Yes | 291 | 40.8<br>(13.2) | 0.57 | 40-40   | Fixed    | 30  | MADRS   | 30.80 |    |          |                   |               |                         |                  |         |         |
|                                                                            |                 |   |   | placebo      | No  | 290 | 42<br>(13)     | 0.56 | 0-0     | Fixed    | 0   | MADRS   | 31.30 |    |          |                   |               |                         |                  |         |         |
|                                                                            |                 |   |   | citalopram   | No  | 289 | 42.6<br>(12.6) | 0.59 | 40-40   | Fixed    | 40  | MADRS   | 31.10 |    |          |                   |               |                         |                  |         |         |
| McGrath 2000                                                               | 2000            | 2 | 2 | fluoxetine   | Yes | 49  | 41.6<br>(11)   | *    | 20-60   | Flexible | 51  | HAMD 17 | *     | 10 | DSM-IV   | North America     | Single center | Secondary/Tertiary care | Outpatients only | Yes     | Unclear |
|                                                                            |                 |   |   | placebo      | No  | 52  | 41.6<br>(11)   | *    | 0-0     | Flexible | 0   | HAMD 17 | *     |    |          |                   |               |                         |                  |         |         |
| McIntyre 2014<br>(NCT01422213)                                             | 2014            | 3 | 3 | placebo      | No  | 198 | 45.6<br>(12.1) | 0.66 | 0-0     | Fixed    | 0   | MADRS   | 31.34 | 8  | DSM-IV   | Cross-Continental | Multi-center  | Secondary/Tertiary care | Both             | Unclear | No      |
|                                                                            |                 |   |   | vortioxetine | Yes | 197 | 45.4<br>(12.2) | 0.69 | 10-10   | Fixed    | 10  | MADRS   | 31.62 |    |          |                   |               |                         |                  |         |         |
|                                                                            |                 |   |   | vortioxetine | Yes | 207 | 46.1<br>(11.8) | 0.64 | 20-20   | Fixed    | 20  | MADRS   | 31.74 |    |          |                   |               |                         |                  |         |         |
| McPartlin 1998                                                             | 1998            | 2 | 2 | paroxetine   | No  | 178 | 44<br>(14)     | *    | 20-20   | Fixed    | 20  | HAMD 17 | 23.00 | 12 | DSM-IV   | Europe            | Multi-center  | Primary care            | Outpatients only | Unclear | Yes     |
|                                                                            |                 |   |   | venlafaxine  | Yes | 183 | 45<br>(15)     | *    | 75-75   | Fixed    | 75  | HAMD 17 | 23.00 |    |          |                   |               |                         |                  |         |         |
| MDF/29060/III/<br>070/88/MC                                                | unpublis<br>hed | 2 | 2 | paroxetine   | Yes | 32  | 73 (*)         |      | 20-30   | Flexible | *   | MADRS   | 30.88 | 5  | Feighner | Europe            | Multi-center  | Other/Unclear           | Outpatients only | Yes     | Yes     |
|                                                                            |                 |   |   | clomipramine | No  | 30  | 73 (*)         |      | 60-75   | Flexible | *   | MADRS   | 29.00 |    |          |                   |               |                         |                  |         |         |
| MDUK/26090/II<br>I/83/007                                                  | unpublis<br>hed | 2 | 3 | paroxetine   | Yes | 4   | *              | 0.50 | 15-30   | Flexible | *   | *       | *     | 4  | Feighner | Europe            | Single center | Secondary/Tertiary care | Inpatients only  | Unclear | Unclear |
|                                                                            |                 |   |   | placebo      | No  | 3   | *              | 0.67 | 0-0     | Flexible | 0   | *       | *     |    |          |                   |               |                         |                  |         |         |
| Mehtonen<br>2000                                                           | 2000            | 2 | 2 | sertraline   | No  | 72  | 41<br>(10.7)   | *    | 50-100  | Flexible | *   | HAMD 21 | 25.80 | 8  | DSM-IV   | Europe            | Multi-center  | Other/Unclear           | Outpatients only | No      | Unclear |
|                                                                            |                 |   |   | venlafaxine  | Yes | 75  | 44.1<br>(11.4) | *    | 75-150  | Flexible | *   | HAMD 21 | 25.50 |    |          |                   |               |                         |                  |         |         |
| Mendels 1995<br>(FDA 03A0A-<br>004B)                                       | 1995            | 3 | 3 | nefazodone   | Yes | 80  | 38.4<br>(*)    | 0.64 | 50-300  | Flexible | 247 | HAMD 17 | 25.10 | 6  | DSM-III  | North America     | Multi-center  | Other/Unclear           | Other/Unclear    | Unclear | Unclear |
|                                                                            |                 |   |   | nefazodone   | Yes | 80  | 39.1<br>(*)    | 0.60 | 100-600 | Flexible | 397 | HAMD 17 | 25.40 |    |          |                   |               |                         |                  |         |         |
|                                                                            |                 |   |   | placebo      | No  | 80  | 40.1<br>(*)    | 0.61 | 0-0     | Flexible | 0   | HAMD 17 | 25.00 |    |          |                   |               |                         |                  |         |         |
| Mendels 1999<br>(Study 85A -<br>FDA)                                       | 1999            | 2 | 2 | citalopram   | No  | 89  | 43.3<br>(*)    | *    | 20-80   | Flexible | 52  | HAMD 24 | 33.52 | 4  | DSM-III  | North America     | Multi-center  | Secondary/Tertiary care | Outpatients only | Yes     | Yes     |
|                                                                            |                 |   |   | placebo      | No  | 91  | 42.7<br>(*)    | *    | 0-0     | Flexible | 0   | HAMD 24 | 33.72 |    |          |                   |               |                         |                  |         |         |
| Miller 1989<br>(MDUK/29060/I<br>II/82/006 (PAR-<br>274) PAR UK 06<br>-FDA) | 1989            | 2 | 2 | paroxetine   | Yes | 22  | 41.6<br>(13.2) | *    | 30-30   | Fixed    | 30  | HAMD 21 | 23.70 | 4  | Feighner | Europe            | Single center | Other/Unclear           | Outpatients only | Unclear | Unclear |
|                                                                            |                 |   |   | placebo      | No  | 25  | 43.3<br>(11.8) | *    | 0-0     | Fixed    | 0   | HAMD 21 | 24.20 |    |          |                   |               |                         |                  |         |         |
| MIR 003-003<br>(FDA)                                                       | unpublis<br>hed | 2 | 2 | mirtazapine  | Yes | 45  | 43 (*)         | 0.47 | *-35    | Flexible | 27  | HAMD 21 | 25.40 | 6  | *        | North America     | Unclear       | Other/Unclear           | Other/Unclear    | Yes     | Yes     |
|                                                                            |                 |   |   | placebo      | No  | 45  | 43 (*)         | 0.67 | 0-0     | Flexible | 0   | HAMD 21 | 25.50 |    |          |                   |               |                         |                  |         |         |

|                                                   |              |   |   |               |         |     |             |      |         |          |     |                  |       |    |                       |               |               |                         |                  |         |         |
|---------------------------------------------------|--------------|---|---|---------------|---------|-----|-------------|------|---------|----------|-----|------------------|-------|----|-----------------------|---------------|---------------|-------------------------|------------------|---------|---------|
| MIR 003-020 (FDA)                                 | unpublis hed | 3 | 3 | mirtazapine   | Yes     | 44  | 44 (*)      | 0.46 | 5-35    | Flexible | 24  | HAMD 21          | 27.80 | 6  | *                     | North America | Unclear       | Other/Unclear           | Outpatients only | Yes     | Yes     |
|                                                   |              |   |   | amitriptyline | No      | 43  | 43 (*)      | 0.45 | 40-280  | Flexible | 137 | HAMD 21          | 29.20 |    |                       |               |               |                         |                  |         |         |
|                                                   |              |   |   | placebo       | No      | 43  | 45 (*)      | 0.62 | 0-0     | Flexible | 0   | HAMD 21          | 29.50 |    |                       |               |               |                         |                  |         |         |
| MIR 003-021 (FDA)                                 | unpublis hed | 3 | 3 | mirtazapine   | Yes     | 50  | 45 (*)      | 0.56 | 5-35    | Flexible | 21  | HAMD 21          | 24.20 | 6  | *                     | North America | Unclear       | Other/Unclear           | Outpatients only | Yes     | Yes     |
|                                                   |              |   |   | amitriptyline | No      | 50  | 44 (*)      | 0.54 | 40-280  | Flexible | 116 | HAMD 21          | 25.00 |    |                       |               |               |                         |                  |         |         |
|                                                   |              |   |   | placebo       | No      | 50  | 48 (*)      | 0.56 | 0-0     | Flexible | 0   | HAMD 21          | 24.40 |    |                       |               |               |                         |                  |         |         |
| MIR 84062 (FDA)                                   | unpublis hed | 3 | 3 | mirtazapine   | Yes     | 15  | *           | *    | *       | Flexible | *   | HAMD 17          | *     | 6  | DSM-III               | Europe        | Single center | Other/Unclear           | Outpatients only | Unclear | Unclear |
|                                                   |              |   |   | amitriptyline | No      | 15  | *           | *    | *       | Flexible | *   | HAMD 17          | *     |    |                       |               |               |                         |                  |         |         |
|                                                   |              |   |   | placebo       | No      | 15  | *           | *    | 0-0     | Flexible | 0   | HAMD 17          | *     |    |                       |               |               |                         |                  |         |         |
| Mischoulon 2014 (NCT00101452)                     | 2014         | 2 | 3 | escitalopram  | No      | 69  | 45 (15)     | 0.50 | 10-20   | Flexible | *   | HAMD 17          | 19.25 | 12 | DSM-IV                | North America | Multi-center  | Other/Unclear           | Outpatients only | Unclear | Unclear |
|                                                   |              |   |   | placebo       | No      | 65  | 45 (15)     | 0.50 | *       | Flexible | *   | HAMD 17          | 19.43 |    |                       |               |               |                         |                  |         |         |
| Miura 2000                                        | 2000         | 2 | 2 | paroxetine    | Yes     | 109 | 45.9 (13.9) | *    | 20-40   | Flexible | 32  | HAMD 17          | 23.80 | 6  | DSM-IV                | Asia          | Multi-center  | Secondary/Tertiary care | Both             | No      | Yes     |
|                                                   |              |   |   | amitriptyline | No      | 119 | 47.1 (13.8) | *    | 50-150  | Flexible | 109 | HAMD 17          | 23.90 |    |                       |               |               |                         |                  |         |         |
| Moises 1981                                       | 1981         | 2 | 2 | amitriptyline | Unclear | 22  | 48.7 (*)    | 0.86 | 150-200 | Flexible | 164 | HAMD unspecified | 24.9  | 4  | Other operationalized | Europe        | Single center | Secondary/Tertiary care | Inpatients only  | Unclear | Yes     |
|                                                   |              |   |   | trazodone     | Unclear | 21  | 48.7 (*)    | 0.86 | 450-600 | Flexible | 512 | HAMD unspecified | 25.3  |    |                       |               |               |                         |                  |         |         |
| Moller 1993 (Stuppaeck 1994, MY-059.073/29060 /1) | 1993         | 2 | 2 | paroxetine    | Yes     | 78  | 47.5 (11.6) | *    | 30-50   | Flexible | 33  | HAMD 21          | 28.60 | 6  | DSM-III               | Europe        | Multi-center  | Secondary/Tertiary care | Inpatients only  | Yes     | Yes     |
|                                                   |              |   |   | amitriptyline | No      | 75  | 46.6 (11.4) | *    | 150-250 | Flexible | 166 | HAMD 21          | 28.90 |    |                       |               |               |                         |                  |         |         |
| Moller 1998 (Hegerl 1997)                         | 1998         | 2 | 2 | amitriptyline | No      | 79  | 49.5 (12.9) | 0.71 | 75-225  | Flexible | 141 | HAMD 21          | 29.1  | 6  | DSM-III-R             | Europe        | Multi-center  | Secondary/Tertiary care | Inpatients only  | No      | Yes     |
|                                                   |              |   |   | sertraline    | Yes     | 81  | 47.7 (13)   | 0.69 | 50-150  | Flexible | 105 | HAMD 21          | 28.3  |    |                       |               |               |                         |                  |         |         |
| Moller 2000                                       | 2000         | 2 | 2 | sertraline    | Yes     | 116 | 47.7 (13.2) | *    | 50-100  | Flexible | 55  | HAMD 21          | 27.10 | 6  | DSM-III-R             | Europe        | Multi-center  | Both                    | Outpatients only | No      | Yes     |
|                                                   |              |   |   | amitriptyline | No      | 124 | 48.1 (14)   | *    | 75-150  | Flexible | 87  | HAMD 21          | 27.50 |    |                       |               |               |                         |                  |         |         |
| Montgomery 1992 (Study 89303 FDA)                 | unpublis hed | 3 | 3 | citalopram    | Yes     | 70  | *           | *    | 20-20   | Fixed    | 20  | HAMD 17          | 24.29 | 6  | DSM-III-R             | *             | Multi-center  | Other/Unclear           | Both             | Yes     | Yes     |
|                                                   |              |   |   | citalopram    | Yes     | 64  | *           | *    | 40-40   | Fixed    | 40  | HAMD 17          | 22.98 |    |                       |               |               |                         |                  |         |         |
|                                                   |              |   |   | placebo       | No      | 66  | *           | *    | 0-0     | Fixed    | 0   | HAMD 17          | 23.72 |    |                       |               |               |                         |                  |         |         |
| Montgomery 2004a (Study 99067)                    | 2004         | 2 | 2 | escitalopram  | Yes     | 148 | 49 (15)     | *    | 10-20   | Flexible | 12  | HAMD 17          | 19.99 | 8  | DSM-IV                | Europe        | Multi-center  | Primary care            | Other/Unclear    | No      | Unclear |
|                                                   |              |   |   | venlafaxine   | No      | 145 | 47 (14)     | *    | 75-150  | Flexible | 95  | HAMD 17          | 20.44 |    |                       |               |               |                         |                  |         |         |

|                                                      |             |   |   |                 |     |     |             |      |         |          |     |         |       |    |           |                   |               |                         |                  |         |         |
|------------------------------------------------------|-------------|---|---|-----------------|-----|-----|-------------|------|---------|----------|-----|---------|-------|----|-----------|-------------------|---------------|-------------------------|------------------|---------|---------|
| Montgomery 2004b (CL3-20098-030)                     | 2001        | 2 | 2 | agomelatine     | Yes | 167 | 42.8 (13.5) | *    | 25-25   | Fixed    | 25  | MADRS   | 23.10 | 12 | DSM-IV    | Cross-Continental | Multi-center  | Primary care            | Outpatients only | No      | No      |
|                                                      |             |   |   | paroxetine      | No  | 168 | 42.1 (13.4) | *    | 20-20   | Fixed    | 20  | MADRS   | 23.00 |    |           |                   |               |                         |                  |         |         |
| Montgomery 2013 (F02695LP202, EudraCT2006-002404-34) | 2013        | 2 | 2 | placebo         | No  | 281 | 45 (*)      | 0.66 | 0-0     | Flexible | 0   | HAMD 17 | 25.80 | 10 | DSM-IV    | Cross-Continental | Multi-center  | Other/Unclear           | Outpatients only | Unclear | Yes     |
|                                                      |             |   |   | levomilnacipran | Yes | 282 | 44 (*)      | 0.67 | 75-100  | Flexible | 65  | HAMD 17 | 26.20 |    |           |                   |               |                         |                  |         |         |
| Moon 1994                                            | 1994        | 2 | 2 | sertraline      | Yes | 51  | 42 (*)      | 0.41 | 50-150  | Flexible | 64  | HAMD 17 | 23.9  | 6  | DSM-III   | Europe            | Multi-center  | Primary care            | Outpatients only | Yes     | Yes     |
|                                                      |             |   |   | clomipramine    | No  | 55  | 45 (*)      | 0.60 | 50-150  | Flexible | 61  | HAMD 17 | 22.7  |    |           |                   |               |                         |                  |         |         |
| Moore 2005                                           | 2005        | 2 | 2 | escitalopram    | Yes | 142 | 44.1 (10.9) | *    | 20-20   | Fixed    | 20  | MADRS   | 36.30 | 8  | DSM-IV    | Europe            | Multi-center  | Both                    | Outpatients only | No      | Unclear |
|                                                      |             |   |   | citalopram      | No  | 152 | 46.2 (11.1) | *    | 40-40   | Fixed    | 40  | MADRS   | 35.70 |    |           |                   |               |                         |                  |         |         |
| Moreno 2005                                          | 2005        | 2 | 3 | fluoxetine      | No  | 20  | 37.7 (9.9)  | 0.83 | 20-20   | Fixed    | 20  | HAMD 21 | 15.41 | 8  | DSM-IV    | South America     | Single center | Secondary/Tertiary care | Outpatients only | Yes     | Yes     |
|                                                      |             |   |   | placebo         | No  | 26  | 45.9 (10.8) | 0.83 | 0-0     | Fixed    | 0   | HAMD 21 | 16.49 |    |           |                   |               |                         |                  |         |         |
| Moscovitch 2004                                      | 2004        | 2 | 2 | sertraline      | Yes | 93  | 39.6 (11.6) | *    | 50-200  | Flexible | 111 | HAMD 17 | 18.62 | 8  | DSM-III-R | Cross-Continental | Multi-center  | Secondary/Tertiary care | Outpatients only | Yes     | Yes     |
|                                                      |             |   |   | placebo         | No  | 94  | 40 (11.2)   | *    | 0-0     | Flexible | 0   | HAMD 17 | 17.76 |    |           |                   |               |                         |                  |         |         |
| Mullin 1996                                          | 1996        | 2 | 2 | mirtazapine     | Yes | 79  | 45.4 (11.8) | *    | 20-60   | Flexible | *   | HAMD 17 | 22.50 | 5  | DSM-III   | Europe            | Multi-center  | Secondary/Tertiary care | Outpatients only | Yes     | Yes     |
|                                                      |             |   |   | amitriptyline   | No  | 77  | 44.2 (10.3) | *    | 75-225  | Flexible | *   | HAMD 17 | 22.60 |    |           |                   |               |                         |                  |         |         |
| Mundt 2012 (NCT00406952)                             | 2012        | 2 | 2 | sertraline      | Yes | 80  | 37.8 (12.5) | 0.63 | 50-100  | Flexible | *   | HAMD 17 | 24.90 | 4  | DSM-IV    | North America     | Multi-center  | Other/Unclear           | Outpatients only | Unclear | Unclear |
|                                                      |             |   |   | placebo         | No  | 85  | 37.8 (12.5) | 0.63 | 0-0     | Flexible | 0   | HAMD 17 | 24.60 |    |           |                   |               |                         |                  |         |         |
| Munizza 2006                                         | 2006        | 2 | 2 | sertraline      | No  | 60  | 46.9 (10.6) | 0.70 | 50-100  | Flexible | 59  | HAMD 17 | 21.9  | 6  | DSM-IV    | Europe            | Multi-center  | Other/Unclear           | Outpatients only | Unclear | Yes     |
|                                                      |             |   |   | trazodone       | Yes | 62  | 45 (11.5)   | 0.60 | 150-450 | Flexible | 297 | HAMD 17 | 21.7  |    |           |                   |               |                         |                  |         |         |
| Murasaki 1998                                        | 1998        | 2 | 2 | fluvoxamine     | Yes | 113 | 40.5 (*)    | *    | 50-150  | Flexible | 87  | HAMD 21 | 22.90 | 4  | DSM-III-R | Asia              | Multi-center  | Both                    | Both             | No      | Yes     |
|                                                      |             |   |   | amitriptyline   | No  | 122 | 45.3 (*)    | *    | 50-150  | Flexible | 76  | HAMD 21 | 23.60 |    |           |                   |               |                         |                  |         |         |
| Murasaki 2010a (iQWIG22532, Schoemaker 2002)         | 2002        | 2 | 2 | mirtazapine     | Yes | 104 | 42 (12.1)   | 0.68 | 15-45   | Flexible | 23  | HAMD 17 | 25.10 | 6  | DSM-IV    | Europe            | Multi-center  | Both                    | Outpatients only | No      | Yes     |
|                                                      |             |   |   | fluvoxamine     | No  | 105 | 39.4 (12.7) | 0.64 | 50-150  | Flexible | 78  | HAMD 17 | 25.10 |    |           |                   |               |                         |                  |         |         |
| Murasaki 2010b (iQWIG9902, Schoemaker 2002)          | 2002        | 2 | 2 | mirtazapine     | Yes | 101 | 40.7 (11.8) | 0.50 | 15-45   | Flexible | *   | HAMD 17 | 22.90 | 6  | DSM-IV    | Asia              | Multi-center  | Both                    | Outpatients only | No      | Yes     |
|                                                      |             |   |   | fluvoxamine     | No  | 102 | 42.2 (12.9) | 0.39 | 50-150  | Flexible | *   | HAMD 17 | 22.50 |    |           |                   |               |                         |                  |         |         |
|                                                      | unpublished | 2 | 3 | paroxetine      | Yes | 4   | 49.3 (*)    | 1.00 | 30-30   | Fixed    | 30  | HAMD 21 | *     | 4  | DSM-IV    | Europe            | Multi-center  | Other/Unclear           | Other/Unclear    | Unclear | Unclear |



|                                                                                                              |              |   |   |                  |         |     |              |      |         |          |     |                  |       |    |           |                   |               |               |                  |         |         |  |  |
|--------------------------------------------------------------------------------------------------------------|--------------|---|---|------------------|---------|-----|--------------|------|---------|----------|-----|------------------|-------|----|-----------|-------------------|---------------|---------------|------------------|---------|---------|--|--|
| MY-1008/BRL-029060/2/CPMS-S-076                                                                              |              |   |   | placebo          | No      | 4   | 46.5 (*)     | 0.50 | 0-0     | Fixed    | 0   | HAMD 21          | *     |    |           |                   |               |               |                  |         |         |  |  |
| MY-1042/BRL-029060/CPMS-251                                                                                  | unpublis hed | 2 | 2 | paroxetine       | Yes     | 125 | 41.7 (11.3)  | *    | 20-50   | Flexible | *   | HAMD unspecified | 24.47 | 8  | DSM-III-R | North America     | Multi-center  | Other/Unclear | Outpatients only | Yes     | Unclear |  |  |
|                                                                                                              |              |   |   | placebo          | No      | 129 | 42 (10.5)    | *    | 0-0     | Flexible | 0   | HAMD unspecified | 24.35 |    |           |                   |               |               |                  |         |         |  |  |
| MY-1043/BRL-029060/115                                                                                       | unpublis hed | 3 | 3 | paroxetine       | Yes     | 284 | 42.3 (12.5)  | *    | 20-50   | Flexible | *   | HAMD 21          | *     | 12 | DSM-III-R | North America     | Multi-center  | Other/Unclear | Outpatients only | Yes     | Unclear |  |  |
|                                                                                                              |              |   |   | fluoxetine       | No      | 289 | 41.7 (11.3)  | *    | 20-80   | Flexible | *   | HAMD 21          | *     |    |           |                   |               |               |                  |         |         |  |  |
|                                                                                                              |              |   |   | placebo          | No      | 118 | 42.1 (11.6)  | *    | 0-0     | Flexible | 0   | HAMD 21          | *     |    |           |                   |               |               |                  |         |         |  |  |
| MY-1045/BRL-029060/1 (PAR 128)                                                                               | unpublis hed | 3 | 3 | paroxetine       | Yes     | 357 | 42.3 (12.6)  | *    | 20-50   | Flexible | *   | HAMD 21          | 25.60 | 12 | DSM-III-R | North America     | Multi-center  | Other/Unclear | Outpatients only | Yes     | Unclear |  |  |
|                                                                                                              |              |   |   | fluoxetine       | No      | 351 | 40.6 (11.6)  | *    | 20-80   | Flexible | *   | HAMD 21          | 25.60 |    |           |                   |               |               |                  |         |         |  |  |
|                                                                                                              |              |   |   | placebo          | No      | 140 | 43.3 (12.2)  | *    | 0-0     | Flexible | 0   | HAMD 21          | 25.70 |    |           |                   |               |               |                  |         |         |  |  |
| Mynors-Wallis 1995                                                                                           | 1995         | 2 | 3 | amitriptyline    | No      | 31  | 37.2 (11.4)  | *    | 150-150 | Fixed    | 139 | HAMD 17          | 19.1  | 12 | RDC       | Europe            | Single center | Primary care  | Outpatients only | Unclear | Unclear |  |  |
|                                                                                                              |              |   |   | placebo          | No      | 30  | 37 (10.4)    | *    | 0-0     | Fixed    | 0   | HAMD 17          | 18.4  |    |           |                   |               |               |                  |         |         |  |  |
| NCT00822744 (EudraCT Number2008-001718-26)                                                                   | unpublis hed | 2 | 5 | escitalopram     | Unclear | 103 | *            | *    | 10-10   | Fixed    | 10  | HAMD 17          | *     | 8  | DSM-IV    | Cross-Continental | Multi-center  | Other/Unclear | Other/Unclear    | Unclear | Unclear |  |  |
|                                                                                                              |              |   |   | placebo          | No      | 106 | *            | *    | 0-0     | Fixed    | 0   | HAMD 17          | *     |    |           |                   |               |               |                  |         |         |  |  |
| NCT01020799                                                                                                  | unpublis hed | 2 | 3 | escitalopram     | No      | 50  | 36.22 (11.3) | 0.44 | 20-20   | Fixed    | 20  | HAMD unspecified | 24.40 | 4  | DSM-IV    | North America     | Multi-center  | Other/Unclear | Other/Unclear    | Unclear | Unclear |  |  |
|                                                                                                              |              |   |   | placebo          | No      | 99  | 41.77 (10.0) | 0.49 | 0-0     | Fixed    | 0   | HAMD unspecified | 24.60 |    |           |                   |               |               |                  |         |         |  |  |
| NCT01145755                                                                                                  | unpublis hed | 2 | 3 | duloxetine       | No      | 47  | 39.9 (*)     | 0.51 | 60-60   | Fixed    | 60  | MADRS            | *     | 6  | *         | North America     | Multi-center  | Other/Unclear | Other/Unclear    | Unclear | Unclear |  |  |
|                                                                                                              |              |   |   | placebo          | No      | 44  | 38.4 (*)     | 0.68 | 0-0     | Fixed    | 0   | MADRS            | *     |    |           |                   |               |               |                  |         |         |  |  |
| NCT01254305                                                                                                  | Unpubli shed | 2 | 3 | placebo          | No      | 93  | 41.4 (12)    | 0.65 | 0-0     | Flexible | 0   | *                | *     | 8  | DSM-IV    | North America     | Multi-center  | Other/Unclear | Other/Unclear    | Yes     | Unclear |  |  |
|                                                                                                              |              |   |   | levomilnacip ran | Yes     | 90  | 42.9 (12.6)  | 0.58 | 40-120  | Flexible | *   | *                | *     |    |           |                   |               |               |                  |         |         |  |  |
| NCT01255787 (EUCTR2010-022257-41, Lu AA21004/CCT-002, U1111-1117-6595, JapicCTI-101344, CTRI/2011/08/001963) | Unpubli shed | 4 | 4 | placebo          | No      | 152 | 43.6 (11.6)  | 0.60 | 0-0     | Fixed    | 0   | MADRS            | 31.60 | 8  | DSM-IV    | Cross-Continental | Multi-center  | Other/Unclear | Other/Unclear    | Unclear | Unclear |  |  |
|                                                                                                              |              |   |   | vortioxetine     | Yes     | 144 | 44.2 (11.9)  | 0.68 | 5-5     | Fixed    | 5   | MADRS            | 31.60 |    |           |                   |               |               |                  |         |         |  |  |
|                                                                                                              |              |   |   | vortioxetine     | Yes     | 150 | 45.7 (10.9)  | 0.62 | 10-10   | Fixed    | 10  | MADRS            | 31.80 |    |           |                   |               |               |                  |         |         |  |  |
|                                                                                                              |              |   |   | vortioxetine     | Yes     | 154 | 44 (11.8)    | 0.60 | 20-20   | Fixed    | 20  | MADRS            | 31.70 |    |           |                   |               |               |                  |         |         |  |  |
| NCT01355081(j apicCTI-111492, U1111-1120-9277)                                                               | Unpubli shed | 3 | 3 | vortioxetine     | Yes     | 119 | 38.8 (10.8)  | 0.42 | 5-5     | Fixed    | 5   | HAMD 17          | 20.90 | 8  | DSM-IV    | Asia              | Multi-center  | Other/Unclear | Other/Unclear    | Unclear | Unclear |  |  |
|                                                                                                              |              |   |   | vortioxetine     | Yes     | 123 | 38.8 (11)    | 0.44 | 10-10   | Fixed    | 10  | HAMD 17          | 21.20 |    |           |                   |               |               |                  |         |         |  |  |
|                                                                                                              |              |   |   | placebo          | No      | 124 | 37.6 (10.7)  | 0.54 | 0-0     | Fixed    | 0   | HAMD 17          | 21.50 |    |           |                   |               |               |                  |         |         |  |  |

|                                                                      |                 |   |   |                  |         |     |                 |      |         |          |     |                     |       |    |               |                  |                  |                                |                     |         |         |  |  |
|----------------------------------------------------------------------|-----------------|---|---|------------------|---------|-----|-----------------|------|---------|----------|-----|---------------------|-------|----|---------------|------------------|------------------|--------------------------------|---------------------|---------|---------|--|--|
| NCT01808612                                                          | unpublis<br>hed | 3 | 3 | fluoxetine       | Yes     | 169 | 40.5<br>(11.2)  | 0.49 | 20-20   | Fixed    | 20  | HAMD 21             | *     | 6  | *             | Asia             | Multi-<br>center | Other/Unc<br>lear              | Outpatients<br>only | Unclear | Unclear |  |  |
|                                                                      |                 |   |   | fluoxetine       | Yes     | 84  | 39.58<br>(10.6) | 0.40 | 40-40   | Fixed    | 40  | HAMD 21             | *     |    |               |                  |                  |                                |                     |         |         |  |  |
|                                                                      |                 |   |   | placebo          | No      | 260 | 38.54<br>(11.6) | 0.50 | 0-0     | Fixed    | 0   | HAMD 21             | *     |    |               |                  |                  |                                |                     |         |         |  |  |
| Nemeroff 1995                                                        | 1995            | 2 | 2 | fluvoxamine      | Yes     | 49  | 38.5<br>(*)     | *    | 50-150  | Flexible | 124 | HAMD 21             | 24.57 | 7  | DSM-<br>III-R | North<br>America | Multi-<br>center | Secondary<br>/Tertiary<br>care | Outpatients<br>only | Yes     | Yes     |  |  |
|                                                                      |                 |   |   | sertraline       | No      | 48  | 41.2<br>(*)     | *    | 50-200  | Flexible | 137 | HAMD 21             | 23.15 |    |               |                  |                  |                                |                     |         |         |  |  |
| Nemeroff 2007                                                        | 2007            | 3 | 3 | fluoxetine       | Unclear | 104 | 37.9<br>(11.5)  | *    | 20-60   | Flexible | 41  | HAMD 21             | 23.70 | 6  | DSM-IV        | North<br>America | Multi-<br>center | Secondary<br>/Tertiary<br>care | Outpatients<br>only | Yes     | Unclear |  |  |
|                                                                      |                 |   |   | venlafaxine      | Yes     | 102 | 40.1<br>(11.1)  | *    | 75-225  | Flexible | 142 | HAMD 21             | 23.50 |    |               |                  |                  |                                |                     |         |         |  |  |
|                                                                      |                 |   |   | placebo          | No      | 102 | 40.4<br>(11.7)  | *    | 0-0     | Flexible | 0   | HAMD 21             | 23.70 |    |               |                  |                  |                                |                     |         |         |  |  |
| Newhouse<br>2000                                                     | 2000            | 2 | 2 | sertraline       | Yes     | 117 | 68<br>(5.3)     | *    | 50-100  | Flexible | 72  | HAMD 24             | 25.10 | 12 | DSM-<br>III-R | North<br>America | Multi-<br>center | Secondary<br>/Tertiary<br>care | Outpatients<br>only | Yes     | Yes     |  |  |
|                                                                      |                 |   |   | fluoxetine       | No      | 119 | 67<br>(5.9)     | *    | 20-40   | Flexible | 29  | HAMD 24             | 25.00 |    |               |                  |                  |                                |                     |         |         |  |  |
| Nierenberg<br>2007 (F1J-MC-<br>HMCR,<br>NCT00073411,<br>Pigott 2007) | 2007            | 3 | 3 | escitalopram     | No      | 274 | 43.3<br>(13)    | *    | 10-10   | Fixed    | 10  | HAMD 17             | 17.80 | 8  | DSM-IV        | North<br>America | Multi-<br>center | Secondary<br>/Tertiary<br>care | Outpatients<br>only | Yes     | Unclear |  |  |
|                                                                      |                 |   |   | duloxetine       | Yes     | 273 | 41.1<br>(11.6)  | *    | 60-60   | Fixed    | 60  | HAMD 17             | 17.60 |    |               |                  |                  |                                |                     |         |         |  |  |
|                                                                      |                 |   |   | placebo          | No      | 137 | 42.5<br>(12.3)  | *    | 0-0     | Fixed    | 0   | HAMD 17             | 17.70 |    |               |                  |                  |                                |                     |         |         |  |  |
| Ninan 2003<br>(poster SCT-<br>MD-26)                                 | unpublis<br>hed | 2 | 2 | escitalopram     | Yes     | 154 | 37.8<br>(11.6)  | *    | 10-20   | Flexible | *   | MADRS               | 30.40 | 8  | DSM-IV        | North<br>America | Multi-<br>center | Other/Unc<br>lear              | Outpatients<br>only | Unclear | Unclear |  |  |
|                                                                      |                 |   |   | placebo          | No      | 155 | 39<br>(11.6)    | *    | 0-0     | Flexible | 0   | MADRS               | 30.50 |    |               |                  |                  |                                |                     |         |         |  |  |
| NKD20006<br>(NCT00048204)                                            | unpublis<br>hed | 2 | 3 | paroxetine       | Yes     | 125 | 37.9<br>(11.9)  | 0.63 | 20-20   | Fixed    | 20  | HAMD 17             | 24.70 | 8  | DSM-IV        | North<br>America | Multi-<br>center | Other/Unc<br>lear              | Outpatients<br>only | Yes     | No      |  |  |
|                                                                      |                 |   |   | placebo          | No      | 125 | 38<br>(11.3)    | 0.56 | 0-0     | Fixed    | 0   | HAMD 17             | 24.50 |    |               |                  |                  |                                |                     |         |         |  |  |
| Noguera 1991                                                         | 1991            | 2 | 2 | clomipramin<br>e | No      | 60  | 46 (*)          | *    | 100-100 | Fixed    | 100 | HAMD<br>unspecified | 24.60 | 6  | DSM-III       | Europe           | Multi-<br>center | Secondary<br>/Tertiary<br>care | Other/Unclea<br>r   | Yes     | Yes     |  |  |
|                                                                      |                 |   |   | fluoxetine       | Yes     | 60  | 46.3<br>(*)     | *    | 20-40   | Flexible | *   | HAMD<br>unspecified | 24.30 |    |               |                  |                  |                                |                     |         |         |  |  |
| Norton 1984                                                          | 1984            | 2 | 3 | fluvoxamine      | Yes     | 35  | 39.2<br>(*)     | *    | 100-*   | Flexible | 133 | HAMD 17             | 19.50 | 4  | RDC           | Europe           | Multi-<br>center | Secondary<br>/Tertiary<br>care | Outpatients<br>only | No      | Yes     |  |  |
|                                                                      |                 |   |   | placebo          | No      | 25  | 38.8<br>(*)     | *    | 0-0     | Flexible | 0   | HAMD 17             | 19.90 |    |               |                  |                  |                                |                     |         |         |  |  |
| Oakes 2012a<br>(NCT00536471)                                         | 2012            | 2 | 2 | duloxetine       | Yes     | 257 | 42.2<br>(12.2)  | 0.60 | 60-60   | Fixed    | 60  | HAMD 17             | 22.90 | 36 | DSM-IV        | North<br>America | Multi-<br>center | Other/Unc<br>lear              | Other/Unclea<br>r   | Unclear | Unclear |  |  |
|                                                                      |                 |   |   | placebo          | No      | 127 | 43.7<br>(12.5)  | 0.61 | 0-0     | Fixed    | 0   | HAMD 17             | 22.80 |    |               |                  |                  |                                |                     |         |         |  |  |
| Oakes 2012b<br>(NCT00536471)                                         | 2012            | 2 | 2 | duloxetine       | Yes     | 261 | 44.7<br>(12.2)  | 0.65 | 60-60   | Fixed    | 60  | HAMD 17             | 22.80 | 36 | DSM-IV        | North<br>America | Multi-<br>center | Other/Unc<br>lear              | Outpatients<br>only | Unclear | Unclear |  |  |

|                                                       |             |   |   |               |         |     |                 |      |         |          |     |                  |       |   |           |               |               |                         |                  |         |         |
|-------------------------------------------------------|-------------|---|---|---------------|---------|-----|-----------------|------|---------|----------|-----|------------------|-------|---|-----------|---------------|---------------|-------------------------|------------------|---------|---------|
|                                                       |             |   |   | placebo       | No      | 131 | 43.9<br>(11.9)  | 0.66 | 0-0     | Fixed    | 0   | HAMD 17          | 22.90 |   |           |               |               |                         |                  |         |         |
| Olie 1997                                             | 1997        | 2 | 2 | sertraline    | Yes     | 129 | 43.6<br>(11.4)  | 0.61 | 50-200  | Flexible | *   | HAMD 17          | 25.4  | 6 | DSM-III-R | Europe        | Unclear       | Other/Unclear           | Outpatients only | Yes     | Yes     |
|                                                       |             |   |   | placebo       | No      | 129 | 43.9<br>(12.1)  | 0.65 | 0-0     | Flexible | 0   | HAMD 17          | 25.5  |   |           |               |               |                         |                  |         |         |
| Olie 2007 (CL3-20098-042)                             | 2004        | 2 | 2 | agomelatine   | Yes     | 118 | 44.3<br>(11.5)  | 0.72 | 25-50   | Flexible | *   | HAMD 17          | 27.40 | 6 | DSM-IV    | Europe        | Multi-center  | Secondary/Tertiary care | Both             | No      | No      |
|                                                       |             |   |   | placebo       | No      | 120 | 45.6<br>(11.1)  | 0.75 | 0-0     | Flexible | 0   | HAMD 17          | 27.20 |   |           |               |               |                         |                  |         |         |
| Ontiveros 1994 (MY-0144/BRL 29060/1/CPMS-135, PAR135) | 1994        | 2 | 2 | paroxetine    | No      | 60  | 43.1<br>(11)    | *    | 20-20   | Fixed    | 20  | HAMD 21          | 26.20 | 6 | DSM-III-R | North America | Multi-center  | Other/Unclear           | Outpatients only | Yes     | No      |
|                                                       |             |   |   | fluoxetine    | No      | 62  | 38.7<br>(10.7)  | *    | 20-20   | Fixed    | 20  | HAMD 21          | 26.40 |   |           |               |               |                         |                  |         |         |
| Ontiveros Sanchez 1998                                | 1998        | 2 | 2 | fluoxetine    | Yes     | 21  | 38.6<br>(11.5)  | 0.43 | 20-20   | Fixed    | 20  | HAMD 17          | 23.50 | 6 | DSM-III-R | South America | Single center | Secondary/Tertiary care | Outpatients only | Yes     | Unclear |
|                                                       |             |   |   | amitriptyline | No      | 21  | 36.5<br>(9.34)  | 0.62 | 150-250 | Flexible | 160 | HAMD 17          | 23.10 |   |           |               |               |                         |                  |         |         |
| Ottevanger 1995                                       | 1995        | 2 | 2 | fluvoxamine   | Yes     | 20  | 51.3<br>(15.39) | *    | 100-300 | Flexible | 204 | HAMD 17          | 26.40 | 4 | Feighner  | Europe        | Multi-center  | Other/Unclear           | Inpatients only  | Unclear | Yes     |
|                                                       |             |   |   | clomipramine  | No      | 20  | 47.05<br>(12.4) | *    | 50-150  | Flexible | 106 | HAMD 17          | 25.70 |   |           |               |               |                         |                  |         |         |
| Ou 2010                                               | 2010        | 2 | 2 | citalopram    | Unclear | 120 | 36.4<br>(12.3)  | 0.54 | 20-40   | Flexible | 28  | HAMD 17          | 22.9  | 6 | DSM-IV    | Asia          | Multi-center  | Secondary/Tertiary care | Both             | Unclear | Yes     |
|                                                       |             |   |   | escitalopram  | Unclear | 120 | 36.7<br>(12.5)  | 0.58 | 10-20   | Flexible | 14  | HAMD 17          | 23.4  |   |           |               |               |                         |                  |         |         |
| PAR 01 001 (GSK & FDA)                                | 1989        | 2 | 2 | paroxetine    | Yes     | 25  | 42.1<br>(*)     | 0.35 | 10-50   | Flexible | 27  | HAMD 21          | 27.90 | 6 | DSM-III   | North America | Single center | Other/Unclear           | Outpatients only | Yes     | Unclear |
|                                                       |             |   |   | placebo       | No      | 25  | 44.1<br>(*)     | 0.35 | 0-0     | Flexible | 0   | HAMD 21          | 27.50 |   |           |               |               |                         |                  |         |         |
| PAR 279 MDUK                                          | unpublished | 2 | 3 | paroxetine    | Yes     | 19  | 39.7<br>(18.2)  | 0.68 | 30-30   | Fixed    | 30  | HAMD unspecified | 22.80 | 6 | *         | Europe        | Multi-center  | Other/Unclear           | Other/Unclear    | Yes     | Unclear |
|                                                       |             |   |   | placebo       | No      | 10  | 51.6<br>(17.3)  | 0.70 | 0-0     | Fixed    | 0   | HAMD unspecified | 22.30 |   |           |               |               |                         |                  |         |         |
| PAR 29060.308 (HP/81/74A)                             | unpublished | 2 | 2 | paroxetine    | Yes     | 10  | 43.3<br>(12.6)  | 0.60 | 30-30   | Fixed    | 30  | *                | *     | 6 | *         | Europe        | Single center | Secondary/Tertiary care | Inpatients only  | Yes     | Unclear |
|                                                       |             |   |   | amitriptyline | No      | 12  | 45.3<br>(12.5)  | 0.58 | 150-150 | Fixed    | 150 | *                | *     |   |           |               |               |                         |                  |         |         |
| PAR 29060.310 (HP 81/85A)                             | unpublished | 2 | 2 | paroxetine    | Yes     | 10  | 39.1<br>(11.9)  | 0.67 | 30-30   | Fixed    | 30  | *                | *     | 7 | *         | Europe        | Single center | Other/Unclear           | Other/Unclear    | Yes     | Unclear |
|                                                       |             |   |   | amitriptyline | No      | 13  | 43.7<br>(10.2)  | 0.50 | 150-150 | Fixed    | 150 | *                | *     |   |           |               |               |                         |                  |         |         |
| PAR 29060.314 (HP 82/134)                             | unpublished | 2 | 2 | paroxetine    | Yes     | 10  | 46.8<br>(13.1)  | 0.30 | 30-30   | Fixed    | 30  | *                | *     | 6 | *         | Europe        | Single center | Other/Unclear           | Other/Unclear    | Yes     | Unclear |
|                                                       |             |   |   | amitriptyline | No      | 8   | 41.8<br>(11.7)  | 0.75 | 150-150 | Fixed    | 150 | *                | *     |   |           |               |               |                         |                  |         |         |
| PAR 29060.316 (HP/82/47A)                             | unpublished | 2 | 2 | paroxetine    | Yes     | 9   | 47.2<br>(14.8)  | 0.78 | 30-30   | Fixed    | 30  | *                | *     | 7 | RDC       | Europe        | Multi-center  | Secondary/Tertiary care | Inpatients only  | Yes     | Unclear |

|                                                              |                 |   |   |                  |         |     |                 |      |         |          |     |                     |       |   |               |                       |                  |                               |                     |         |         |
|--------------------------------------------------------------|-----------------|---|---|------------------|---------|-----|-----------------|------|---------|----------|-----|---------------------|-------|---|---------------|-----------------------|------------------|-------------------------------|---------------------|---------|---------|
|                                                              |                 |   |   | amitriptyline    | No      | 8   | 41<br>(11.7)    | 1.00 | 150-150 | Fixed    | 150 | *                   | *     |   |               |                       |                  |                               |                     |         |         |
| PAR 29060.318<br>(HP/82/64A)                                 | unpublis<br>hed | 2 | 2 | paroxetine       | Yes     | 9   | 47.3<br>(10.1)  | 1.00 | 30-30   | Fixed    | 30  | *                   | *     | 7 | *             | Europe                | Single<br>center | Secondary<br>Tertiary<br>care | Inpatients<br>only  | Yes     | Unclear |
|                                                              |                 |   |   | amitriptyline    | No      | 12  | 50.1<br>(8.2)   | 1.00 | 150-150 | Fixed    | 150 | *                   | *     |   |               |                       |                  |                               |                     |         |         |
| PAR 29060/281                                                | unpublis<br>hed | 2 | 2 | paroxetine       | Yes     | 82  | 39.5<br>(13.1)  | 0.78 | 30-30   | Fixed    | 30  | HAMD 21             | 27.80 | 6 | Feighne<br>r  | Europe                | Single<br>center | Primary<br>care               | Other/Unclea<br>r   | Yes     | Unclear |
|                                                              |                 |   |   | amitriptyline    | No      | 80  | 38.1<br>(13.1)  | 0.75 | 75-150  | Flexible | *   | HAMD 21             | 26.60 |   |               |                       |                  |                               |                     |         |         |
| PAR MDUK 032                                                 | unpublis<br>hed | 2 | 2 | paroxetine       | Yes     | 29  | 42.6<br>(11.7)  | *    | 20-30   | Flexible | *   | HAMD 17             | 24.00 | 6 | DSM-III       | *                     | Multi-<br>center | Primary<br>care               | Outpatients<br>only | Unclear | Unclear |
|                                                              |                 |   |   | amitriptyline    | No      | 30  | 46.2<br>(11.8)  | *    | 100-150 | Flexible | *   | HAMD 17             | 23.20 |   |               |                       |                  |                               |                     |         |         |
| Patris 1996<br>(Study 91301 -<br>FDA)                        | 1996            | 2 | 2 | fluoxetine       | No      | 184 | 43 (*)          | *    | 20-20   | Fixed    | 20  | MADRS               | 29.40 | 8 | DSM-<br>III-R | Europe                | Multi-<br>center | Primary<br>care               | Outpatients<br>only | Yes     | Unclear |
|                                                              |                 |   |   | citalopram       | Yes     | 173 | 44 (*)          | *    | 20-20   | Fixed    | 20  | MADRS               | 29.70 |   |               |                       |                  |                               |                     |         |         |
| Paykel 1988                                                  | 1988            | 2 | 2 | amitriptyline    | No      | 45  | *               | *    | 125-175 | Flexible | 111 | HAMD 17             | 16.2  | 6 | RDC           | Europe                | Multi-<br>center | Primary<br>care               | Outpatients<br>only | Unclear | Yes     |
|                                                              |                 |   |   | placebo          | No      | 55  | *               | *    | 0-0     | Flexible | 0   | HAMD 17             | 15.8  |   |               |                       |                  |                               |                     |         |         |
| Pelicier 1993<br>(PAR<br>MDED/29060/II<br>I/86/1728M291<br>) | 1993            | 2 | 2 | clomipramin<br>e | No      | 42  | 70.2<br>(8.9)   |      | 60-60   | Fixed    | 60  | MADRS               | 30.00 | 5 | Feighne<br>r  | Europe                | Multi-<br>center | Other/Unc<br>lear             | Outpatients<br>only | Unclear | Unclear |
|                                                              |                 |   |   | paroxetine       | Yes     | 41  | 71.1<br>(8)     |      | 20-20   | Fixed    | 20  | MADRS               | 29.50 |   |               |                       |                  |                               |                     |         |         |
| Perahia 2006<br>(HMAY - Study<br>Group B)                    | 2006            | 4 | 4 | duloxetine       | Yes     | 93  | 46.47<br>(12.7) | *    | 80-80   | Fixed    | 80  | HAMD 17             | 21.30 | 8 | DSM-IV        | Unspecified           | Multi-<br>center | Other/Unc<br>lear             | Outpatients<br>only | Yes     | Unclear |
|                                                              |                 |   |   | duloxetine       | Yes     | 103 | 43.99<br>(10.8) | *    | 120-120 | Fixed    | 120 | HAMD 17             | 21.38 |   |               |                       |                  |                               |                     |         |         |
|                                                              |                 |   |   | paroxetine       | No      | 97  | 45.81<br>(10.6) | *    | 20-20   | Fixed    | 20  | HAMD 17             | 21.03 |   |               |                       |                  |                               |                     |         |         |
|                                                              |                 |   |   | placebo          | No      | 99  | 44.67<br>(10.1) | *    | 0-0     | Fixed    | 0   | HAMD 17             | 20.58 |   |               |                       |                  |                               |                     |         |         |
| Perahia 2008a<br>(HMBU)<br>(NCT00071695)                     | 2008            | 2 | 2 | duloxetine       | Yes     | 166 | 45.42<br>(13)   | 0.72 | 60-60   | Fixed    | 60  | HAMD 17             | 23.10 | 6 | DSM-IV        | Cross-<br>Continental | Multi-<br>center | Other/Unc<br>lear             | Outpatients<br>only | Unclear | Unclear |
|                                                              |                 |   |   | venlafaxine      | No      | 166 | 42.62<br>(13.1) | 0.69 | 150-150 | Fixed    | 150 | HAMD 17             | 23.10 |   |               |                       |                  |                               |                     |         |         |
| Perahia 2008b<br>(HMCQ,<br>NCT00067912)                      | 2008            | 3 | 3 | duloxetine       | Yes     | 164 | 43.07<br>(12.6) | 0.67 | 60-60   | Fixed    | 60  | HAMD 17             | 22.21 | 6 | DSM-IV        | Cross-<br>Continental | Multi-<br>center | Other/Unc<br>lear             | Outpatients<br>only | Unclear | Unclear |
|                                                              |                 |   |   | venlafaxine      | No      | 169 | 42.46<br>(12.4) | 0.68 | 75-75   | Fixed    | 75  | HAMD 17             | 22.51 |   |               |                       |                  |                               |                     |         |         |
|                                                              |                 |   |   | venlafaxine      | No      | 171 | 40.64<br>(11.4) | 0.62 | 150-150 | Fixed    | 150 | HAMD 17             | 22.24 |   |               |                       |                  |                               |                     |         |         |
| Pomara 2013                                                  | 2013            | 2 | 2 | vilazodone       | Unclear | 255 | *               | *    | 40-40   | Fixed    | 40  | MADRS               | *     | 9 | DSM-IV        | North<br>America      | Multi-<br>center | Other/Unc<br>lear             | Outpatients<br>only | Unclear | Unclear |
|                                                              |                 |   |   | placebo          | No      | 253 | *               | *    | 0-0     | Fixed    | 0   | MADRS               | *     |   |               |                       |                  |                               |                     |         |         |
| Preskorn 1991                                                | 1991            | 2 | 2 | fluoxetine       | Yes     | 30  | *               | *    | 20-60   | Flexible | *   | HAMD<br>unspecified | 23.8  | 6 | DSM-III       | North<br>America      | Multi-<br>center | Other/Unc<br>lear             | Outpatients<br>only | Yes     | Yes     |
|                                                              |                 |   |   | amitriptyline    | No      | 31  | *               | *    | 50-200  | Flexible | *   | HAMD<br>unspecified | 23.5  |   |               |                       |                  |                               |                     |         |         |

|                                                                   |                 |   |   |                  |         |     |                 |      |         |          |     |         |       |    |                                  |                       |                  |                                |                     |         |         |  |
|-------------------------------------------------------------------|-----------------|---|---|------------------|---------|-----|-----------------|------|---------|----------|-----|---------|-------|----|----------------------------------|-----------------------|------------------|--------------------------------|---------------------|---------|---------|--|
| PZ/109                                                            | unpublis<br>hed | 2 | 2 | sertraline       | Yes     | 104 | *               | 0.60 | *       | Flexible | *   | HAMD 17 | 22.00 | 8  | *                                | *                     | *                | *                              | *                   | *       | *       |  |
|                                                                   |                 |   |   | placebo          | No      | 103 | *               | 0.66 | *       | Flexible | *   | HAMD 17 | 21.50 |    |                                  |                       |                  |                                |                     |         |         |  |
| PZ/111                                                            | unpublis<br>hed | 3 | 3 | fluoxetine       | No      | 108 | *               | 0.67 | *       | Flexible | *   | HAMD 17 | 24.40 | 8  | *                                | *                     | *                | *                              | *                   | *       | *       |  |
|                                                                   |                 |   |   | sertraline       | Yes     | 106 | *               | 0.75 | *       | Flexible | *   | HAMD 17 | 24.1  |    |                                  |                       |                  |                                |                     |         |         |  |
|                                                                   |                 |   |   | placebo          | No      | 105 | *               | 0.65 | *       | Flexible | *   | HAMD 17 | 24.2  |    |                                  |                       |                  |                                |                     |         |         |  |
| Quera-Salva<br>2010 (CL3-<br>20098-056)                           | 2010            | 2 | 2 | agomelatine      | Yes     | 71  | 41.3<br>(12.4)  | *    | 25-50   | Flexible | *   | HAMD 17 | 26.10 | 25 | DSM-IV                           | Cross-<br>Continental | Multi-<br>center | Primary<br>care                | Outpatients<br>only | No      | No      |  |
|                                                                   |                 |   |   | escitalopram     | No      | 67  | 41.4<br>(10.7)  | *    | 10-20   | Flexible | *   | HAMD 17 | 26.10 |    |                                  |                       |                  |                                |                     |         |         |  |
| Raft 1981                                                         | 1981            | 2 | 3 | amitriptyline    | No      | 12  | *               | *    | 100-300 | Flexible | 235 | HAMD17  | 29.66 | 5  | Feighner                         | North<br>America      | Single<br>center | Secondary<br>/Tertiary<br>care | Inpatients<br>only  | Unclear | Unclear |  |
|                                                                   |                 |   |   | placebo          | No      | 7   | *               | *    | 0-0     | Flexible | 0   | HAMD 17 | 27.2  |    |                                  |                       |                  |                                |                     |         |         |  |
| Rapaport 1996                                                     | 1996            | 2 | 2 | fluvoxamine      | Yes     | 51  | 40 (*)          | *    | 100-150 | Flexible | 102 | HAMD 21 | 25.20 | 7  | DSM-<br>III-R                    | North<br>America      | Multi-<br>center | Other/Unc<br>lear              | Outpatients<br>only | Yes     | Yes     |  |
|                                                                   |                 |   |   | fluoxetine       | No      | 49  | 38.6<br>(*)     | *    | 20-80   | Flexible | 34  | HAMD 21 | 25.60 |    |                                  |                       |                  |                                |                     |         |         |  |
| Rapaport 2003<br>(PAR487)                                         | 2003            | 3 | 3 | paroxetine       | Yes     | 104 | 70.39<br>(5.93) | *    | 12.5-50 | Flexible | 30  | HAMD 17 | 22.10 | 12 | DSM-IV                           | North<br>America      | Multi-<br>center | Other/Unc<br>lear              | Outpatients<br>only | Yes     | Unclear |  |
|                                                                   |                 |   |   | paroxetine       | Yes     | 106 | 70.05<br>(6.59) | *    | 10-40   | Flexible | 26  | HAMD 17 | 22.30 |    |                                  |                       |                  |                                |                     |         |         |  |
|                                                                   |                 |   |   | placebo          | No      | 109 | 69.39<br>(5.4)  | *    | 0-0     | Flexible | 0   | HAMD 17 | 22.10 |    |                                  |                       |                  |                                |                     |         |         |  |
| Rapaport 2009<br>(BRL-<br>29060/874)<br>(NCT00067444)             | 2009            | 2 | 3 | paroxetine       | Yes     | 177 | 67<br>(6.56)    | *    | 25-25   | Fixed    | 25  | HAMD 17 | 22.74 | 10 | DSM-IV                           | North<br>America      | Multi-<br>center | Other/Unc<br>lear              | Outpatients<br>only | Yes     | Unclear |  |
|                                                                   |                 |   |   | placebo          | No      | 180 | 68<br>(6.7)     | *    | 0-0     | Fixed    | 0   | HAMD 17 | 22.41 |    |                                  |                       |                  |                                |                     |         |         |  |
| Raskin 2007<br>(HMBV,<br>NCT00062673)                             | 2007            | 2 | 2 | duloxetine       | Yes     | 207 | 72.63<br>(5.65) | 0.60 | 60-60   | Fixed    | 60  | HAMD 17 | 18.76 | 8  | DSM-IV                           | North<br>America      | Multi-<br>center | Other/Unc<br>lear              | Other/Unclea<br>r   | Yes     | Unclear |  |
|                                                                   |                 |   |   | placebo          | No      | 104 | 73.33<br>(5.73) | 0.58 | 0-0     | Fixed    | 0   | HAMD 17 | 18.94 |    |                                  |                       |                  |                                |                     |         |         |  |
| Ravindran 1995                                                    | 1995            | 2 | 3 | sertraline       | Yes     | 40  | 38.8<br>(10.9)  | 0.65 | 50-200  | Flexible | *   | HAMD 17 | 20.7  | 8  | DSM-<br>III-R                    | North<br>America      | Multi-<br>center | Secondary<br>/Tertiary<br>care | Outpatients<br>only | Yes     | Unclear |  |
|                                                                   |                 |   |   | placebo          | No      | 26  | 39<br>(9.7)     | 0.58 | 0-0     | Flexible | 0   | HAMD 17 | 21    |    |                                  |                       |                  |                                |                     |         |         |  |
| Ravindran 1997<br>(MY-1055/BRL-<br>029060/1/CPM<br>S-245 PAR 245) | 1997            | 2 | 2 | paroxetine       | Yes     | 513 | 43.3<br>(13)    | 0.73 | 20-40   | Flexible | *   | MADRS   | 29.7  | 12 | Other<br>operati<br>onalize<br>d | Cross-<br>Continental | Multi-<br>center | Primary<br>care                | Other/Unclea<br>r   | Yes     | Yes     |  |
|                                                                   |                 |   |   | clomipramin<br>e | No      | 506 | 42<br>(12.5)    | 0.73 | 75-150  | Flexible | *   | MADRS   | 29.1  |    |                                  |                       |                  |                                |                     |         |         |  |
| Reimherr 1990<br>(SER 104 - FDA)                                  | 1990            | 3 | 3 | amitriptyline    | No      | 149 | 37.9<br>(*)     | *    | 50-150  | Flexible | 104 | HAMD 17 | 23.18 | 8  | DSM-III                          | North<br>America      | Multi-<br>center | Secondary<br>/Tertiary<br>care | Outpatients<br>only | Yes     | No      |  |
|                                                                   |                 |   |   | placebo          | No      | 150 | 40.1<br>(*)     | *    | 0-0     | Flexible | 0   | HAMD 17 | 23.43 |    |                                  |                       |                  |                                |                     |         |         |  |
|                                                                   |                 |   |   | sertraline       | Unclear | 149 | 39 (*)          | *    | 50-200  | Flexible | 145 | HAMD 17 | 23.28 |    |                                  |                       |                  |                                |                     |         |         |  |

|                                                 |      |   |   |               |         |     |                 |      |         |          |     |         |       |    |           |                   |               |                         |                  |         |         |  |  |
|-------------------------------------------------|------|---|---|---------------|---------|-----|-----------------|------|---------|----------|-----|---------|-------|----|-----------|-------------------|---------------|-------------------------|------------------|---------|---------|--|--|
| Reimherr 1998<br>(WELL203,<br>FDA203)           | 1998 | 2 | 3 | placebo       | No      | 121 | 40.2<br>(12.2)  | *    | 0-0     | Fixed    | 0   | HAMD 17 | 23.21 | 8  | DSM-III-R | North America     | Multi-center  | Other/Unclear           | Outpatients only | Yes     | Unclear |  |  |
|                                                 |      |   |   | bupropion     | Yes     | 120 | 38.6<br>(10.7)  | *    | 300-300 | Fixed    | 300 | HAMD 17 | 23.41 |    |           |                   |               |                         |                  |         |         |  |  |
| Remick 1994                                     | 1994 | 2 | 2 | amitriptyline | No      | 17  | 41 (*)          | *    | 50-300  | Flexible | 135 | HAMD 17 | 23.50 | 7  | DSM-III   | North America     | Multi-center  | Secondary/Tertiary care | Outpatients only | Yes     | Unclear |  |  |
|                                                 |      |   |   | fluvoxamine   | Yes     | 16  | 41.7<br>(*)     | *    | 50-300  | Flexible | 175 | HAMD 17 | 23.80 |    |           |                   |               |                         |                  |         |         |  |  |
| Rickels 1982                                    | 1982 | 3 | 3 | amitriptyline | No      | 68  | 40<br>(13)      | *    | 75-200  | Flexible | 140 | HAMD 21 | 26.46 | 6  | DSM-III   | North America     | Single center | Both                    | Outpatients only | Unclear | Unclear |  |  |
|                                                 |      |   |   | placebo       | No      | 68  | 40<br>(13)      | *    | 0-0     | Flexible | 0   | HAMD 21 | 26.46 |    |           |                   |               |                         |                  |         |         |  |  |
|                                                 |      |   |   | trazodone     | Unclear | 66  | 40<br>(13)      | *    | 150-400 | Flexible | 275 | HAMD 21 | 26.46 |    |           |                   |               |                         |                  |         |         |  |  |
| Rickels 1985                                    | 1985 | 2 | 4 | amitriptyline | No      | 124 | 39<br>(11.7)    | *    | 50-225  | Flexible | 148 | HAMD 21 | 25.48 | 6  | DSM-III   | North America     | Multi-center  | Secondary/Tertiary care | Outpatients only | Yes     | No      |  |  |
|                                                 |      |   |   | placebo       | No      | 130 | 39<br>(11.7)    | *    | 0-0     | Flexible | 0   | HAMD 21 | 26.38 |    |           |                   |               |                         |                  |         |         |  |  |
| Rickels 1994<br>(FDA CN104-005)                 | 1994 | 2 | 3 | nefazodone    | Yes     | 96  | 44.7<br>(13.5)  | 0.68 | 100-600 | Flexible | 375 | HAMD 17 | 24.40 | 8  | DSM-III-R | North America     | Multi-center  | Both                    | Outpatients only | Unclear | Yes     |  |  |
|                                                 |      |   |   | placebo       | No      | 95  | 42.6<br>(13.5)  | 0.60 | 0-0     | Flexible | 0   | HAMD 17 | 23.50 |    |           |                   |               |                         |                  |         |         |  |  |
| Rickels 1995<br>(FDA CN104-006-1)               | 1995 | 2 | 3 | nefazodone    | Yes     | 45  | *               | *    | 200-600 | Flexible | 419 | HAMD 17 | 24.20 | 8  | DSM-III-R | North America     | Single center | Other/Unclear           | Outpatients only | Unclear | No      |  |  |
|                                                 |      |   |   | placebo       | No      | 44  | *               | *    | 0-0     | Flexible | 0   | HAMD 17 | 24.20 |    |           |                   |               |                         |                  |         |         |  |  |
| Rickels 2009<br>(GNSC-04-DP-02,<br>NCT00285376) | 2009 | 2 | 2 | vilazodone    | Yes     | 205 | 40<br>(12.1)    | *    | 40-40   | Fixed    | 40  | HAMD 17 | 24.80 | 8  | DSM-IV    | North America     | Multi-center  | Other/Unclear           | Other/Unclear    | Unclear | Unclear |  |  |
|                                                 |      |   |   | placebo       | No      | 205 | 39.8<br>(12.7)  | *    | 0-0     | Fixed    | 0   | HAMD 17 | 24.90 |    |           |                   |               |                         |                  |         |         |  |  |
| Robinson 2014<br>(NCT00406848)                  | 2014 | 2 | 2 | duloxetine    | Yes     | 249 | 73.01<br>(6.26) | 0.66 | 60-60   | Fixed    | 60  | HAMD 17 | 19.40 | 24 | DSM-IV    | Cross-Continental | Multi-center  | Other/Unclear           | Other/Unclear    | Yes     | Unclear |  |  |
|                                                 |      |   |   | placebo       | No      | 121 | 73.1<br>(5.64)  | 0.59 | 0-0     | Fixed    | 0   | HAMD 17 | 19.30 |    |           |                   |               |                         |                  |         |         |  |  |
| Roffman 1982                                    | 1982 | 2 | 3 | amitriptyline | No      | 95  | 42.55<br>(12.3) | *    | 75-225  | Fixed    | 225 | HAMD 21 | 24.2  | 4  | DSM-III   | North America     | Multi-center  | Other/Unclear           | Outpatients only | Yes     | Yes     |  |  |
|                                                 |      |   |   | placebo       | No      | 94  | 44.66<br>(12.1) | *    | 0-0     | Fixed    | 0   | HAMD 21 | 24.5  |    |           |                   |               |                         |                  |         |         |  |  |
| Roose 2004<br>(CIT-MD-03)                       | 2004 | 2 | 2 | citalopram    | Yes     | 87  | 79.9<br>(4)     | 0.54 | 10-40   | Flexible | *   | HAMD 24 | 24.40 | 8  | DSM-IV    | North America     | Multi-center  | Other/Unclear           | Outpatients only | Yes     | Unclear |  |  |
|                                                 |      |   |   | placebo       | No      | 91  | 79.3<br>(4.7)   | 0.62 | 0-0     | Flexible | 0   | HAMD 24 | 24.20 |    |           |                   |               |                         |                  |         |         |  |  |
| Ropert 1989                                     | 1989 | 2 | 2 | fluoxetine    | Unclear | 71  | 42.7<br>(11)    | 0.60 | 20-20   | Fixed    | 20  | HAMD 21 | 23.00 | 6  | DSM-III   | Europe            | Multi-center  | Other/Unclear           | Outpatients only | Unclear | Unclear |  |  |
|                                                 |      |   |   | clomipramine  | No      | 72  | 44.8<br>(12.6)  | 0.69 | 75-75   | Fixed    | 75  | HAMD 21 | 23.00 |    |           |                   |               |                         |                  |         |         |  |  |
| Rossini 2005                                    | 2005 | 2 | 2 | fluvoxamine   | Unclear | 40  | 67.8<br>(*)     | *    | 200-200 | Fixed    | 200 | HAMD 21 | 31.23 | 7  | DSM-IV    | Europe            | Single center | Secondary/Tertiary care | Inpatients only  | Unclear | Yes     |  |  |
|                                                 |      |   |   | sertraline    | Unclear | 48  | 68.2<br>(*)     | *    | 150-150 | Fixed    | 150 | HAMD 21 | 29.23 |    |           |                   |               |                         |                  |         |         |  |  |

|                                                                |      |   |   |                 |     |     |                |      |              |                   |     |                     |       |    |               |                  |                  |                                |                     |         |         |  |  |  |
|----------------------------------------------------------------|------|---|---|-----------------|-----|-----|----------------|------|--------------|-------------------|-----|---------------------|-------|----|---------------|------------------|------------------|--------------------------------|---------------------|---------|---------|--|--|--|
| Roth 1990                                                      | 1990 | 2 | 3 | fluvoxamine     | Yes | 30  | 42.8<br>(11.1) | 0.67 | 100-300      | Flexible          | 218 | HAMD<br>unspecified | 28.3  | 6  | DSM-III       | North<br>America | Multi-<br>center | Secondary<br>/Tertiary<br>care | Outpatients<br>only | Yes     | Yes     |  |  |  |
|                                                                |      |   |   | placebo         | No  | 30  | 43.9<br>(11.3) | 0.52 | 0-0          | Flexible          | 0   | HAMD<br>unspecified | 28.9  |    |               |                  |                  |                                |                     |         |         |  |  |  |
| Rouillon 1991<br>(Limosin 2006,<br>029060/1/CPM<br>S 069 1991) | 1991 | 2 | 2 | paroxetine      | Yes | 45  | 71.8<br>(7.4)  | 0.87 | 20-50        | Other/U<br>nclear | *   | HAMD 21             | 27    | 6  | DSM-III       | Europe           | Multi-<br>center | Secondary<br>/Tertiary<br>care | Inpatients<br>only  | Unclear | Unclear |  |  |  |
|                                                                |      |   |   | clomipramine    | No  | 47  | 70.8<br>(6.5)  | 0.91 | 50-150       | Other/U<br>nclear | *   | HAMD 21             | 27.6  |    |               |                  |                  |                                |                     |         |         |  |  |  |
| Rowan 1980                                                     | 1980 | 2 | 3 | amitriptyline   | No  | 44  | *              | *    | 75-<br>187.5 | Flexible          | *   | HAMD 17             | *     | 6  | RDC           | Europe           | Single<br>center | Secondary<br>/Tertiary<br>care | Outpatients<br>only | Yes     | Unclear |  |  |  |
|                                                                |      |   |   | placebo         | No  | 45  | *              | *    | 0-0          | Flexible          | 0   | HAMD 17             | *     |    |               |                  |                  |                                |                     |         |         |  |  |  |
| Rudolph 1998<br>(VEN 600A-203<br>FDA)                          | 1998 | 4 | 4 | venlafaxine     | Yes | 89  | 43.6<br>(10.9) | 0.40 | 75-75        | Fixed             | 75  | HAMD 21             | 26.00 | 6  | DSM-III       | North<br>America | Multi-<br>center | Secondary<br>/Tertiary<br>care | Outpatients<br>only | Yes     | Yes     |  |  |  |
|                                                                |      |   |   | venlafaxine     | Yes | 89  | 43.1<br>(9.61) | 0.43 | 225-225      | Fixed             | 225 | HAMD 21             | 26.00 |    |               |                  |                  |                                |                     |         |         |  |  |  |
|                                                                |      |   |   | venlafaxine     | Yes | 88  | 43.8<br>(10.3) | 0.33 | 375-375      | Fixed             | 375 | HAMD 21             | 24.90 |    |               |                  |                  |                                |                     |         |         |  |  |  |
|                                                                |      |   |   | placebo         | No  | 92  | 41.5<br>(11.3) | 0.32 | 0-0          | Fixed             | 0   | HAMD 21             | 25.30 |    |               |                  |                  |                                |                     |         |         |  |  |  |
| Rudolph 1999                                                   | 1999 | 3 | 3 | fluoxetine      | No  | 103 | 40 (*)         | *    | 20-60        | Flexible          | 47  | HAMD 21             | 26.00 | 8  | DSM-IV        | North<br>America | Multi-<br>center | Secondary<br>/Tertiary<br>care | Outpatients<br>only | Yes     | Unclear |  |  |  |
|                                                                |      |   |   | venlafaxine     | Yes | 100 | 40 (*)         | *    | 75-225       | Flexible          | 175 | HAMD 21             | 25.00 |    |               |                  |                  |                                |                     |         |         |  |  |  |
|                                                                |      |   |   | placebo         | No  | 98  | 40 (*)         | *    | 0-0          | Flexible          | 0   | HAMD 21             | 25.00 |    |               |                  |                  |                                |                     |         |         |  |  |  |
| Rush 1998<br>(excluding<br>Armitage 1997<br>and Gillin 1997)   | 1998 | 2 | 2 | nefazodone      | Yes | *   | *              | *    | 200-500      | Flexible          | *   | HAMD 17             | *     | 8  | DSM-<br>III-R | North<br>America | Multi-<br>center | Other/Unc<br>lear              | Outpatients<br>only | Unclear | Unclear |  |  |  |
|                                                                |      |   |   | fluoxetine      | No  | *   | *              | *    | 20-40        | Flexible          | *   | HAMD 17             | *     |    |               |                  |                  |                                |                     |         |         |  |  |  |
| Rush 2001                                                      | 2001 | 2 | 2 | bupropion       | Yes | 122 | 39 (*)         | 0.48 | 100-300      | Flexible          | 259 | HAMD 21             | 24.8  | 16 | DSM-IV        | North<br>America | Multi-<br>center | Other/Unc<br>lear              | Outpatients<br>only | Unclear | Unclear |  |  |  |
|                                                                |      |   |   | sertraline      | No  | 126 | 40 (*)         | 0.48 | 50-200       | Flexible          | 123 | HAMD 21             | 24.8  |    |               |                  |                  |                                |                     |         |         |  |  |  |
| Sacchetti 2002<br>(BRL-<br>29060/109)                          | 2002 | 2 | 2 | paroxetine      | Yes | 64  | 48.7<br>(*)    | 0.64 | 20-50        | Flexible          | *   | HAMD 21             | 25.4  | 12 | DSM-<br>III-R | Europe           | Multi-<br>center | Secondary<br>/Tertiary<br>care | Outpatients<br>only | Yes     | Yes     |  |  |  |
|                                                                |      |   |   | amitriptyline   | No  | 65  | 50.5<br>(*)    | 0.66 | 100-250      | Flexible          | *   | HAMD 21             | 26.2  |    |               |                  |                  |                                |                     |         |         |  |  |  |
| Sambunaris<br>2014 (LVM-MD-<br>03,<br>NCT01034462)             | 2014 | 2 | 2 | placebo         | No  | 220 | 44.6<br>(13.9) | 0.66 | 0-0          | Flexible          | 0   | HAMD 17             | 22.90 | 8  | DSM-IV        | North<br>America | Multi-<br>center | Other/Unc<br>lear              | Outpatients<br>only | Yes     | Yes     |  |  |  |
|                                                                |      |   |   | levomilnacipran | Yes | 222 | 45<br>(13.2)   | 0.65 | 40-120       | Flexible          | 73  | HAMD 17             | 23.30 |    |               |                  |                  |                                |                     |         |         |  |  |  |
| Samuelian 1998                                                 | 1998 | 2 | 2 | venlafaxine     | Yes | 52  | 47<br>(12)     | *    | 100-150      | Flexible          | 105 | HAMD 21             | 27.80 | 6  | DSM-<br>III-R | Europe           | Multi-<br>center | Other/Unc<br>lear              | Outpatients<br>only | Yes     | Yes     |  |  |  |
|                                                                |      |   |   | clomipramine    | No  | 50  | 47<br>(11)     | *    | 100-150      | Flexible          | 105 | HAMD 21             | 27.80 |    |               |                  |                  |                                |                     |         |         |  |  |  |
| Sauer 2003                                                     | 2003 | 2 | 2 | venlafaxine     | Yes | 79  | 48.5<br>(10.8) | *    | 75-150       | Flexible          | 85  | HAMD 21             | 23.60 | 6  | ICD-10        | Europe           | Multi-<br>center | Both                           | Outpatients<br>only | Unclear | No      |  |  |  |
|                                                                |      |   |   | amitriptyline   | No  | 77  | 46<br>(10.9)   | *    | 75-150       | Flexible          | 84  | HAMD 21             | 23.64 |    |               |                  |                  |                                |                     |         |         |  |  |  |

|                                            |             |   |   |              |         |     |                |        |         |          |          |         |         |       |           |                   |               |                         |                  |         |         |  |  |
|--------------------------------------------|-------------|---|---|--------------|---------|-----|----------------|--------|---------|----------|----------|---------|---------|-------|-----------|-------------------|---------------|-------------------------|------------------|---------|---------|--|--|
| Schatzberg 2002 (003-901)                  | 2002        | 2 | 2 | mirtazapine  | Yes     | 128 | 71.7<br>(5.7)  | *      | 15-45   | Flexible | 34       | HAMD 17 | 22.20   | 8     | DSM-IV    | North America     | Multi-center  | Other/Unclear           | Outpatients only | Unclear | Yes     |  |  |
|                                            |             |   |   | paroxetine   | No      | 126 | 72<br>(5.1)    | *      | 20-40   | Flexible | 34       | HAMD 17 | 22.40   |       |           |                   |               |                         |                  |         |         |  |  |
| Schatzberg 2006a                           | 2006        | 3 | 3 | fluoxetine   | No      | 100 | 71 (*)         | *      | 20-60   | Flexible | *        | HAMD 21 | 24.00   | 8     | DSM-IV    | North America     | Multi-center  | Secondary/Tertiary care | Outpatients only | Yes     | Yes     |  |  |
|                                            |             |   |   | venlafaxine  | Yes     | 104 | 71 (*)         | *      | 75-225  | Flexible | *        | HAMD 21 | 24.00   |       |           |                   |               |                         |                  |         |         |  |  |
|                                            |             |   |   | 3            | placebo | No  | 96             | 71 (*) | *       | 0-0      | Flexible | 0       | HAMD 21 | 23.00 |           |                   |               |                         |                  |         |         |  |  |
| Schneider 2003                             | 2003        | 2 | 2 | sertraline   | Yes     | 371 | 70<br>(6.8)    | 0.54   | 50-100  | Flexible | 82       | HAMD 17 | 21.40   | 8     | DSM-IV    | North America     | Multi-center  | Both                    | Outpatients only | Yes     | Yes     |  |  |
|                                            |             |   |   | placebo      | No      | 376 | 69.6<br>(6.5)  | 0.58   | 0-0     | Flexible | 0        | HAMD 17 | 21.40   |       |           |                   |               |                         |                  |         |         |  |  |
| Schoene 1993 (Geretsegger 1994 MY1021/BRC) | 1993        | 2 | 2 | paroxetine   | Yes     | 54  | 74.3<br>(6)    | *      | 20-50   | Flexible | *        | HAMD 21 | 29.00   | 6     | DSM-III-R | Europe            | Multi-center  | Other/Unclear           | Outpatients only | Yes     | Unclear |  |  |
|                                            |             |   |   | fluoxetine   | No      | 52  | 73.7<br>(6.4)  | *      | 20-80   | Flexible | *        | HAMD 21 | 27.90   |       |           |                   |               |                         |                  |         |         |  |  |
| Schwartz 2002 (iQWIG)                      | 2002        | 2 | 2 | reboxetine   | Unclear | 80  | 41.9<br>(*)    | 0.71   | 8-10    | Flexible | *        | HAMD 17 | 28.60   | 8     | DSM-IV    | Cross-Continental | Multi-center  | Other/Unclear           | Other/Unclear    | Unclear | Unclear |  |  |
|                                            |             |   |   | venlafaxine  | Unclear | 87  | 42.2<br>(*)    | 0.67   | 225-375 | Flexible | *        | HAMD 17 | 28.80   |       |           |                   |               |                         |                  |         |         |  |  |
| Schweizer 1994 (VEN 600A-301 FDA)          | 1994        | 2 | 3 | venlafaxine  | Yes     | 76  | 41<br>(13)     | 0.71   | 150-225 | Flexible | 179      | HAMD 21 | 25.39   | 6     | DSM-III-R | North America     | Multi-center  | Other/Unclear           | Outpatients only | Yes     | Unclear |  |  |
|                                            |             |   |   | placebo      | No      | 78  | 42<br>(12)     | 0.67   | 0-0     | Flexible | 0        | HAMD 21 | 24.56   |       |           |                   |               |                         |                  |         |         |  |  |
| SCT-MD-09                                  | unpublished | 2 | 2 | escitalopram | Yes     | 16  | 35.9<br>(10.6) | *      | 10-20   | Fixed    | *        | *       | *       | 5     | DSM-IV    | North America     | Single center | Other/Unclear           | Outpatients only | Unclear | Unclear |  |  |
|                                            |             |   |   | fluoxetine   | No      | 14  | 41.4<br>(9.8)  | *      | 20-40   | Fixed    | *        | *       | *       |       |           |                   |               |                         |                  |         |         |  |  |
| SCT-MD-49 (NCT00668525)                    | unpublished | 3 | 3 | escitalopram | Yes     | 325 | 41.4<br>(12.3) | 0.64   | 10-10   | Fixed    | 10       | HAMD 24 | 29.30   | 8     | DSM-IV    | North America     | Multi-center  | Other/Unclear           | Other/Unclear    | Yes     | Unclear |  |  |
|                                            |             |   |   | escitalopram | Yes     | 332 | 40.4<br>(11.9) | 0.69   | 28-28   | Fixed    | 28       | HAMD 24 | 29.30   |       |           |                   |               |                         |                  |         |         |  |  |
|                                            |             |   |   | placebo      | No      | 220 | 42.3<br>(12.7) | 0.63   | *       | Fixed    | *        | HAMD 24 | 28.90   |       |           |                   |               |                         |                  |         |         |  |  |
| Sechter 1999                               | 1999        | 2 | 2 | sertraline   | Yes     | 118 | 43.4<br>(12.3) | *      | 50-150  | Flexible | 77       | HAMD 17 | 24.50   | 8     | DSM-III-R | Europe            | Multi-center  | Secondary/Tertiary care | Outpatients only | No      | Unclear |  |  |
|                                            |             |   |   | fluoxetine   | No      | 120 | 42.5<br>(11.1) | *      | 20-60   | Flexible | 34       | HAMD 17 | 24.90   |       |           |                   |               |                         |                  |         |         |  |  |
| Sechter 2004                               | 2004        | 2 | 2 | milnacipran  | Yes     | 149 | 44.8<br>(11.6) | *      | 100-100 | Fixed    | 100      | HAMD 17 | 23.70   | 6     | DSM-IV    | Europe            | Multi-center  | Secondary/Tertiary care | Outpatients only | Unclear | Unclear |  |  |
|                                            |             |   |   | paroxetine   | No      | 153 | 42.8<br>(11.2) | *      | 20-20   | Fixed    | 20       | HAMD 17 | 23.40   |       |           |                   |               |                         |                  |         |         |  |  |
| SER 101 (FDA)                              | unpublished | 4 | 5 | sertraline   | Yes     | 26  | *              | *      | 50-50   | Fixed    | 50       | HAMD 17 | *       | 4     | DSM-III   | North America     | Multi-center  | Secondary/Tertiary care | Inpatients only  | Yes     | Unclear |  |  |
|                                            |             |   |   | sertraline   | Yes     | 24  | *              | *      | 100-100 | Fixed    | 100      | HAMD 17 | *       |       |           |                   |               |                         |                  |         |         |  |  |
|                                            |             |   |   | sertraline   | Yes     | 23  | *              | *      | 200-200 | Fixed    | 200      | HAMD 17 | *       |       |           |                   |               |                         |                  |         |         |  |  |



|                                                          |                 |   |   |               |         |     |                      |      |               |          |     |                     |       |   |               |                  |                  |                                |                     |         |         |
|----------------------------------------------------------|-----------------|---|---|---------------|---------|-----|----------------------|------|---------------|----------|-----|---------------------|-------|---|---------------|------------------|------------------|--------------------------------|---------------------|---------|---------|
|                                                          |                 |   |   | placebo       | No      | 26  | *                    | *    | 0-0           | Fixed    | 0   | HAMD 17             | *     |   |               |                  |                  |                                |                     |         |         |
| SER 310 (FDA)                                            | unpublis<br>hed | 4 | 4 | sertraline    | Yes     | 33  | *                    | *    | 50-50         | Fixed    | 50  | *                   | *     | 4 | DSM-III       | Europe           | Multi-<br>center | Secondary<br>/Tertiary<br>care | Inpatients<br>only  | Yes     | Yes     |
|                                                          |                 |   |   | sertraline    | Yes     | 35  | *                    | *    | 100-100       | Fixed    | 100 | *                   | *     |   |               |                  |                  |                                |                     |         |         |
|                                                          |                 |   |   | sertraline    | Yes     | 37  | *                    | *    | 200-200       | Fixed    | 200 | *                   | *     |   |               |                  |                  |                                |                     |         |         |
|                                                          |                 |   |   | placebo       | No      | 34  | *                    | *    | 0-0           | Fixed    | 0   | *                   | *     |   |               |                  |                  |                                |                     |         |         |
| SER 315 (FDA)                                            | unpublis<br>hed | 3 | 3 | sertraline    | Yes     | 85  | 41 (*)               | 0.66 | 50-200        | Flexible | 105 | HAMD 17             | 23.10 | 8 | DSM-III       | Europe           | Multi-<br>center | Other/Unc<br>lear              | Outpatients<br>only | Yes     | Yes     |
|                                                          |                 |   |   | amitriptyline | No      | 77  | 44 (*)               | 0.71 | 50-200        | Flexible | 82  | HAMD 17             | 23.50 |   |               |                  |                  |                                |                     |         |         |
|                                                          |                 |   |   | placebo       | No      | 80  | 43 (*)               | 0.78 | 0-0           | Flexible | 0   | HAMD 17             | 22.20 |   |               |                  |                  |                                |                     |         |         |
| SER-CHN-1                                                | unpublis<br>hed | 2 | 2 | paroxetine    | Yes     | 113 | 40.14<br>(13.2)      | 0.55 | 20-30         | Flexible | *   | HAMD<br>unspecified | 27.10 | 6 | DSM-<br>III-R | Asia             | Multi-<br>center | Other/Unc<br>lear              | Other/Unclea<br>r   | Unclear | Unclear |
|                                                          |                 |   |   | amitriptyline | No      | 118 | 40.54<br>(13.45<br>) | 0.53 | 150-150       | Fixed    | 150 | HAMD<br>unspecified | 26.60 |   |               |                  |                  |                                |                     |         |         |
| Settle 1999<br>(WELL212)                                 | 1999            | 2 | 3 | bupropion     | Yes     | 150 | 37.2<br>(11.3)       | *    | 100-300       | Flexible | *   | HAMD 21             | 24.40 | 8 | DSM-<br>III-R | North<br>America | Multi-<br>center | Other/Unc<br>lear              | Outpatients<br>only | Yes     | No      |
|                                                          |                 |   |   | placebo       | No      | 154 | 38.2<br>(11.4)       | *    | 0-0           | Flexible | 0   | HAMD 21             | 23.88 |   |               |                  |                  |                                |                     |         |         |
| Shaw 1986                                                | 1986            | 2 | 2 | citalopram    | Unclear | 24  | *                    | *    | 30-60         | Flexible | 46  | HAMD 17             | 25.67 | 6 | DSM-III       | Europe           | Multi-<br>center | Secondary<br>/Tertiary<br>care | Both                | Unclear | Yes     |
|                                                          |                 |   |   | amitriptyline | Unclear | 20  | *                    | *    | 112.5-<br>225 | Flexible | 148 | HAMD 17             | 26.48 |   |               |                  |                  |                                |                     |         |         |
| Sheehan 2009a                                            | 2009            | 3 | 3 | fluoxetine    | No      | 99  | 37.8<br>(11.1)       | 0.69 | 60-80         | Flexible | 61  | HAMD 21             | 29.50 | 6 | DSM-IV        | North<br>America | Multi-<br>center | Secondary<br>/Tertiary<br>care | Inpatients<br>only  | Yes     | Yes     |
|                                                          |                 |   |   | venlafaxine   | Yes     | 95  | 41.7<br>(12.8)       | 0.48 | 225-375       | Flexible | 298 | HAMD 21             | 29.90 |   |               |                  |                  |                                |                     |         |         |
|                                                          |                 |   |   | placebo       | No      | 95  | 39.9<br>(13)         | 0.64 | 0-0           | Flexible | 0   | HAMD 21             | 29.40 |   |               |                  |                  |                                |                     |         |         |
| Sheehan 2009b<br>(NCT00775203)                           | 2009            | 2 | 2 | trazodone     | Yes     | 206 | 43.8<br>(12.8)       | 0.64 | 150-375       | Flexible | 310 | HAMD 17             | 23.20 | 8 | DSM-IV        | North<br>America | Multi-<br>center | Other/Unc<br>lear              | Other/Unclea<br>r   | No      | No      |
|                                                          |                 |   |   | placebo       | No      | 206 | 44<br>(13.5)         | 0.64 | 0-0           | Flexible | 0   | HAMD 17             | 22.40 |   |               |                  |                  |                                |                     |         |         |
| Shelton 2006<br>(NCT00179283)                            | 2006            | 2 | 2 | venlafaxine   | Unclear | 78  | 37.2<br>(11.6)       | *    | 75-225        | Flexible | *   | HAMD 17             | 22.40 | 8 | DSM-IV        | North<br>America | Multi-<br>center | Secondary<br>/Tertiary<br>care | Outpatients<br>only | Unclear | No      |
|                                                          |                 |   |   | sertraline    | Yes     | 82  | 41.2<br>(12)         | *    | 50-150        | Flexible | *   | HAMD 17             | 22.10 |   |               |                  |                  |                                |                     |         |         |
| Shibley 1981                                             | 1981            | 2 | 2 | amitriptyline | No      | 53  | 39<br>(13.1)         | *    | 200-200       | Fixed    | 200 | HAMD 17             | 38.5  | 4 | RDC           | North<br>America | Single<br>center | Secondary<br>/Tertiary<br>care | Inpatients<br>only  | Yes     | Unclear |
|                                                          |                 |   |   | placebo       | No      | 23  | 40.3<br>(13.9)       | *    | 0-0           | Fixed    | 0   | HAMD 17             | 44.2  |   |               |                  |                  |                                |                     |         |         |
| Shu 2014 (CL3-<br>20098-052,<br>ChiCTR-TRC-<br>11001668) | 2014            | 2 | 2 | agomelatine   | Yes     | 314 | 39.2<br>(12.8)       | 0.68 | 25-50         | Flexible | *   | HAMD 17             | 26.80 | 8 | DSM-IV        | Asia             | Multi-<br>center | Primary<br>care                | Outpatients<br>only | No      | No      |
|                                                          |                 |   |   | fluoxetine    | No      | 314 | 38.9<br>(12.6)       | 0.71 | 20-40         | Flexible | *   | HAMD 17             | 26.80 |   |               |                  |                  |                                |                     |         |         |

|                              |      |   |   |               |         |     |                 |      |         |          |     |         |       |    |           |                   |               |                         |                  |         |         |  |  |
|------------------------------|------|---|---|---------------|---------|-----|-----------------|------|---------|----------|-----|---------|-------|----|-----------|-------------------|---------------|-------------------------|------------------|---------|---------|--|--|
| Silverstone 1999             | 1999 | 3 | 3 | fluoxetine    | No      | 121 | 43.2<br>(10.9)  | *    | 20-60   | Flexible | 40  | HAMD 21 | 27.20 | 12 | DSM-IV    | *                 | Multi-center  | Other/Unclear           | Outpatients only | Yes     | Unclear |  |  |
|                              |      |   |   | venlafaxine   | Yes     | 128 | 41.1<br>(12)    | *    | 75-225  | Flexible | 141 | HAMD 21 | 27.20 |    |           |                   |               |                         |                  |         |         |  |  |
|                              |      |   |   | placebo       | No      | 119 | 41.6<br>(10.8)  | *    | 0-0     | Flexible | 0   | HAMD 21 | 27.20 |    |           |                   |               |                         |                  |         |         |  |  |
| Sir 2005                     | 2005 | 2 | 2 | venlafaxine   | No      | 84  | 36.8<br>(12.4)  | *    | 75-225  | Flexible | 161 | HAMD 17 | 23.50 | 8  | DSM-IV    | Cross-Continental | Multi-center  | Secondary/Tertiary care | Outpatients only | Unclear | Unclear |  |  |
|                              |      |   |   | sertraline    | Yes     | 79  | 37.3<br>(13.5)  | *    | 50-150  | Flexible | 105 | HAMD 17 | 23.40 |    |           |                   |               |                         |                  |         |         |  |  |
| Smeraldi 1998                | 1998 | 3 | 3 | venlafaxine   | Unclear | 55  | 71 (6)          | *    | 75-150  | Flexible | *   | *       | *     | 6  | DSM-III-R | Europe            | Multi-center  | Other/Unclear           | Both             | Yes     | Unclear |  |  |
|                              |      |   |   | clomipramine  | Unclear | 58  | 71 (6)          | *    | 50-100  | Flexible | *   | *       | *     |    |           |                   |               |                         |                  |         |         |  |  |
|                              |      |   |   | trazodone     | Unclear | 57  | 71 (6)          | *    | 150-300 | Flexible | *   | *       | *     |    |           |                   |               |                         |                  |         |         |  |  |
| Smith 1990 (MIR 003-024 FDA) | 1990 | 3 | 3 | mirtazapine   | Yes     | 50  | *               | *    | 10-35   | Flexible | 18  | HAMD 21 | 27.50 | 6  | DSM-III   | North America     | Unclear       | Secondary/Tertiary care | Outpatients only | Yes     | Unclear |  |  |
|                              |      |   |   | amitriptyline | No      | 50  | *               | *    | 80-280  | Flexible | 111 | HAMD 21 | 27.60 |    |           |                   |               |                         |                  |         |         |  |  |
|                              |      |   |   | placebo       | No      | 50  | *               | *    | 0-0     | Flexible | 0   | HAMD 21 | 27.70 |    |           |                   |               |                         |                  |         |         |  |  |
| Sramek 1995                  | 1995 | 2 | 3 | fluoxetine    | No      | 72  | 33.9<br>(*)     | 0.60 | 20-20   | Fixed    | 20  | HAMD 24 | 28.20 | 9  | DSM-III-R | North America     | Single center | Other/Unclear           | Other/Unclear    | Yes     | Unclear |  |  |
|                              |      |   |   | placebo       | No      | 72  | 33.9<br>(*)     | 0.60 | 0-0     | Fixed    | 0   | HAMD 24 | 27.50 |    |           |                   |               |                         |                  |         |         |  |  |
| Stahl 2000                   | 2000 | 3 | 3 | citalopram    | Yes     | 107 | 39.1<br>(*)     | *    | 20-60   | Flexible | 57  | HAMD 21 | 26.50 | 8  | DSM-IV    | North America     | Multi-center  | Other/Unclear           | Outpatients only | Yes     | Unclear |  |  |
|                              |      |   |   | sertraline    | Unclear | 108 | 39.5<br>(*)     | *    | 50-150  | Flexible | 143 | HAMD 21 | 26.60 |    |           |                   |               |                         |                  |         |         |  |  |
|                              |      |   |   | placebo       | No      | 108 | 37.3<br>(*)     | *    | 0-0     | Flexible | 0   | HAMD 21 | 26.40 |    |           |                   |               |                         |                  |         |         |  |  |
| Stahl 2010 (CAGO178A2302)    | 2010 | 3 | 3 | agomelatine   | Yes     | 168 | 43.2<br>(11.82) | 0.68 | 25-25   | Fixed    | 25  | HAMD 17 | 26.80 | 8  | DSM-IV    | North America     | Multi-center  | Other/Unclear           | Outpatients only | Unclear | No      |  |  |
|                              |      |   |   | agomelatine   | Yes     | 169 | 43.8<br>(11.96) | 0.64 | 50-50   | Fixed    | 50  | HAMD17  | 26.80 |    |           |                   |               |                         |                  |         |         |  |  |
|                              |      |   |   | placebo       | No      | 166 | 43<br>(13.11)   | 0.65 | 0-0     | Fixed    | 0   | HAMD 17 | 26.40 |    |           |                   |               |                         |                  |         |         |  |  |
| Staner 1995 (063)            | 1995 | 2 | 2 | paroxetine    | Yes     | 21  | 41.7<br>(10.8)  | *    | 30-30   | Fixed    | 30  | HAMD 21 | 26.00 | 5  | RDC       | Europe            | Single center | Secondary/Tertiary care | Inpatients only  | Yes     | Yes     |  |  |
|                              |      |   |   | amitriptyline | No      | 19  | 42.5<br>(11.7)  | *    | 150-150 | Fixed    | 150 | HAMD 21 | 24.00 |    |           |                   |               |                         |                  |         |         |  |  |
| Stark 1985 (Study 27 - FDA)  | 1985 | 2 | 3 | fluoxetine    | Yes     | 185 | 40 (*)          | 0.68 | 20-80   | Flexible | 69  | HAMD 21 | 27.50 | 6  | DSM-III   | North America     | Multi-center  | Other/Unclear           | Outpatients only | Yes     | Unclear |  |  |
|                              |      |   |   | placebo       | No      | 169 | 41 (*)          | 0.67 | 0-0     | Flexible | 0   | HAMD 21 | 28.10 |    |           |                   |               |                         |                  |         |         |  |  |

|                              |              |   |   |               |     |     |              |      |         |               |     |         |       |    |                       |                   |               |                         |                  |         |         |
|------------------------------|--------------|---|---|---------------|-----|-----|--------------|------|---------|---------------|-----|---------|-------|----|-----------------------|-------------------|---------------|-------------------------|------------------|---------|---------|
| Stratas 1984                 | 1984         | 2 | 3 | amitriptyline | No  | 12  | *            | *    | 50-300  | Flexible      | 179 | HAMD 21 | *     | 6  | RDC                   | North America     | Single center | Secondary/Tertiary care | Outpatients only | Yes     | Unclear |
|                              |              |   |   | placebo       | No  | 10  | *            | *    | 0-0     | Flexible      | 0   | HAMD 21 | *     |    |                       |                   |               |                         |                  |         |         |
| Studie009 (CTN009-FCE20124)  | unpublis hed | 2 | 2 | reboxetine    | Yes | 26  | 45.81 (11.3) | 0.65 | 8-8     | Fixed         | 8   | HAMD 17 | 25.33 | 4  | DSM-III               | Europe            | Multi-center  | Secondary/Tertiary care | Inpatients only  | Unclear | Yes     |
|                              |              |   |   | placebo       | No  | 24  | 47.04 (13.5) | 0.67 | 0-0     | Fixed         | 0   | HAMD 17 | 25.27 |    |                       |                   |               |                         |                  |         |         |
| Studie032 (M2020/0032)       | unpublis hed | 2 | 2 | reboxetine    | Yes | 43  | 40.65 (14.6) | 0.63 | 8-10    | Flexible      | 8   | HAMD 21 | 27.23 | 8  | DSM-IV                | Asia              | Multi-center  | Secondary/Tertiary care | Both             | Yes     | Yes     |
|                              |              |   |   | fluoxetine    | No  | 42  | 35.98 (12.7) | 0.62 | 20-40   | Flexible      | 27  | HAMD 21 | 28.33 |    |                       |                   |               |                         |                  |         |         |
| Study 015                    | unpublis hed | 2 | 3 | reboxetine    | Yes | 112 | 45.9 (12.7)  | 0.63 | 8-10    | Flexible      | 9   | HAMD 21 | 27.50 | 6  | DSM-III-R             | Cross-Continental | Multi-center  | Secondary/Tertiary care | Both             | Unclear | Yes     |
|                              |              |   |   | placebo       | No  | 112 | 43.3 (11.7)  | 0.48 | 0-0     | Flexible      | 0   | HAMD 21 | 27.10 |    |                       |                   |               |                         |                  |         |         |
| Study 032a (CTN032-FCE20124) | unpublis hed | 2 | 2 | reboxetine    | Yes | 24  | 79.75 (7.11) | 0.79 | 4-6     | Flexible      | *   | HAMD 21 | 23.20 | 8  | DSM-III-R             | Europe            | Multi-center  | Secondary/Tertiary care | Inpatients only  | Unclear | Yes     |
|                              |              |   |   | placebo       | No  | 26  | 80.15 (4.51) | 0.77 | 0-0     | Flexible      | 0   | HAMD 21 | 23.10 |    |                       |                   |               |                         |                  |         |         |
| Study 043                    | 2006         | 2 | 2 | reboxetine    | Yes | 183 | 42.8 (13.3)  | 0.69 | 8-10    | Flexible      | 9   | HAMD 21 | 27.40 | 24 | DSM-IV                | Europe            | Multi-center  | Other/Unclear           | Outpatients only | Unclear | Yes     |
|                              |              |   |   | citalopram    | No  | 176 | 41.5 (12)    | 0.60 | 20-40   | Flexible      | 28  | HAMD 21 | 27.40 |    |                       |                   |               |                         |                  |         |         |
| Study 045                    | unpublis hed | 3 | 4 | reboxetine    | Yes | 87  | 40.8 (10)    | 0.63 | 4-4     | Fixed         | 4   | HAMD 21 | 26.20 | 6  | DSM-IV                | Cross-Continental | Multi-center  | Both                    | Both             | No      | Yes     |
|                              |              |   |   | reboxetine    | Yes | 89  | 41.6 (10.6)  | 0.63 | 8-8     | Fixed         | 8   | HAMD 21 | 26.40 |    |                       |                   |               |                         |                  |         |         |
|                              |              |   |   | placebo       | No  | 87  | 40.5 (11.2)  | 0.70 | 0-0     | Fixed         | 0   | HAMD 21 | 26.40 |    |                       |                   |               |                         |                  |         |         |
| Study 049                    | unpublis hed | 2 | 2 | reboxetine    | Yes | 107 | 39.9 (11.6)  | 0.55 | 8-10    | Flexible      | 10  | HAMD 21 | 25.10 | 6  | DSM-IV                | North America     | Multi-center  | Other/Unclear           | Outpatients only | Yes     | No      |
|                              |              |   |   | placebo       | No  | 105 | 39.7 (11.1)  | 0.58 | 0-0     | Flexible      | 0   | HAMD 21 | 25.30 |    |                       |                   |               |                         |                  |         |         |
| Study 19 (FDA, Fabre 1985)   | unpublis hed | 2 | 2 | fluoxetine    | Yes | 22  | 34.1 (*)     | 0.75 | 40-80   | Flexible      | *   | HAMD 21 | 28.90 | 5  | RDC                   | *                 | Single center | Other/Unclear           | Outpatients only | Yes     | Unclear |
|                              |              |   |   | placebo       | No  | 25  | 32 (*)       | 0.48 | 0-0     | Flexible      | 0   | HAMD 21 | 27.40 |    |                       |                   |               |                         |                  |         |         |
| Study 205 (FDA, WELL 205)    | unpublis hed | 4 | 5 | bupropion     | Yes | 120 | 39.6 (10.4)  | 0.57 | 200-200 | Fixed         | 200 | HAMD 17 | 23.20 | 8  | Other operationalized | North America     | Multi-center  | Other/Unclear           | Outpatients only | Yes     | Unclear |
|                              |              |   |   | bupropion     | Yes | 120 | 39.9 (11.4)  | 0.62 | 300-300 | Fixed         | 300 | HAMD 17 | 23.60 |    |                       |                   |               |                         |                  |         |         |
|                              |              |   |   | bupropion     | Yes | 119 | 38.8 (11.7)  | 0.58 | 400-400 | Fixed         | 400 | HAMD 17 | 24.20 |    |                       |                   |               |                         |                  |         |         |
|                              |              |   |   | placebo       | No  | 124 | 40.7 (11.6)  | 0.68 | 0-0     | Fixed         | 0   | HAMD 17 | 23.40 |    |                       |                   |               |                         |                  |         |         |
| Study 25 (FDA, Rickels 1986) | unpublis hed | 2 | 2 | fluoxetine    | Yes | 18  | 49.4 (*)     | 0.72 | *-80    | Other/Unclear | *   | HAMD 21 | 25.20 | 5  | RDC                   | *                 | Unclear       | Other/Unclear           | Outpatients only | Yes     | Unclear |

|                                                          |                 |   |   |               |     |     |                 |      |         |                  |     |                     |       |    |               |                  |                  |                                |                     |         |         |  |  |
|----------------------------------------------------------|-----------------|---|---|---------------|-----|-----|-----------------|------|---------|------------------|-----|---------------------|-------|----|---------------|------------------|------------------|--------------------------------|---------------------|---------|---------|--|--|
|                                                          |                 |   |   | placebo       | No  | 24  | 45.7<br>(*)     | 0.83 | 0-0     | Other/U<br>nclar | 0   | HAMD 21             | 25.80 |    |               |                  |                  |                                |                     |         |         |  |  |
| Study 62a (FDA)<br>- MILD<br>depression<br>(Dunlop 1990) | unpublis<br>hed | 4 | 4 | fluoxetine    | Yes | 104 | 38.31<br>(*)    | 0.59 | 60-60   | Fixed            | 60  | HAMD 21             | 17.20 | 6  | DSM-III       | *                | Multi-<br>center | Other/Unc<br>lear              | Outpatients<br>only | Yes     | Unclear |  |  |
|                                                          |                 |   |   | fluoxetine    | Yes | 105 | 39.8<br>(*)     | 0.56 | 40-40   | Fixed            | 40  | HAMD 21             | 16.83 |    |               |                  |                  |                                |                     |         |         |  |  |
|                                                          |                 |   |   | fluoxetine    | Yes | 107 | 39.97<br>(*)    | 0.62 | 20-20   | Fixed            | 20  | HAMD 21             | 16.99 |    |               |                  |                  |                                |                     |         |         |  |  |
|                                                          |                 |   |   | placebo       | No  | 56  | 38.96<br>(*)    | 0.50 | 0-0     | Fixed            | 0   | HAMD 21             | 17.41 |    |               |                  |                  |                                |                     |         |         |  |  |
| Study 62b<br>(FDA) -<br>MODERATE<br>depression           | unpublis<br>hed | 4 | 4 | fluoxetine    | Yes | 105 | 39.93<br>(*)    | 0.58 | 60-60   | Fixed            | 60  | HAMD 21             | 24.20 | 6  | DSM-III       | *                | Multi-<br>center | Other/Unc<br>lear              | Outpatients<br>only | Yes     | Unclear |  |  |
|                                                          |                 |   |   | fluoxetine    | Yes | 103 | 41.15<br>(*)    | 0.56 | 40-40   | Fixed            | 40  | HAMD 21             | 24.19 |    |               |                  |                  |                                |                     |         |         |  |  |
|                                                          |                 |   |   | fluoxetine    | Yes | 100 | 39.4<br>(*)     | 0.60 | 20-20   | Fixed            | 20  | HAMD 21             | 24.72 |    |               |                  |                  |                                |                     |         |         |  |  |
|                                                          |                 |   |   | placebo       | No  | 48  | 38.56<br>(*)    | 0.50 | 0-0     | Fixed            | 0   | HAMD 21             | 24.25 |    |               |                  |                  |                                |                     |         |         |  |  |
| Study 89306<br>(FDA)                                     | unpublis<br>hed | 3 | 3 | citalopram    | Yes | 88  | *               | *    | 20-20   | Fixed            | 20  | MADRS               | 32.70 | 6  | DSM-<br>III-R | *                | Multi-<br>center | Both                           | Both                | Yes     | Yes     |  |  |
|                                                          |                 |   |   | citalopram    | Yes | 97  | *               | *    | 40-40   | Fixed            | 40  | MADRS               | 31.30 |    |               |                  |                  |                                |                     |         |         |  |  |
|                                                          |                 |   |   | placebo       | No  | 89  | *               | *    | 0-0     | Fixed            | 0   | MADRS               | 33.14 |    |               |                  |                  |                                |                     |         |         |  |  |
| Study F1J-MC-<br>HMAQ - Study<br>Group B                 | unpublis<br>hed | 3 | 3 | duloxetine    | Yes | 82  | 39.86<br>(9.8)  | *    | 40-120  | Flexible         | *   | HAMD 17             | 17.88 | 10 | DSM-IV        | North<br>America | Multi-<br>center | Other/Unc<br>lear              | Outpatients<br>only | Yes     | Unclear |  |  |
|                                                          |                 |   |   | placebo       | No  | 75  | 41.39<br>(11.8) | *    | 0-0     | Flexible         | 0   | HAMD 17             | 18.32 |    |               |                  |                  |                                |                     |         |         |  |  |
|                                                          |                 |   |   | fluoxetine    | No  | 37  | 39.65<br>(12.7) | *    | 20-20   | Fixed            | 20  | HAMD 17             | 20.03 |    |               |                  |                  |                                |                     |         |         |  |  |
| Szegedi 2006                                             | 2006            | 2 | 2 | mirtazapine   | Yes | 130 | *               | *    | 45-45   | Fixed            | 45  | HAMD 17             | 24.60 | 6  | DSM-IV        | Europe           | Multi-<br>center | Other/Unc<br>lear              | Outpatients<br>only | No      | Unclear |  |  |
|                                                          |                 |   |   | venlafaxine   | No  | 128 | *               | *    | 225-225 | Fixed            | 225 | HAMD 17             | 24.90 |    |               |                  |                  |                                |                     |         |         |  |  |
| Thase 1997<br>(VEN XR 209<br>FDA)                        | 1997            | 2 | 2 | venlafaxine   | Yes | 95  | 40<br>(11)      | 0.63 | 75-225  | Flexible         | 177 | HAMD 21             | 24.53 | 8  | DSM-IV        | North<br>America | Multi-<br>center | Other/Unc<br>lear              | Outpatients<br>only | Yes     | Yes     |  |  |
|                                                          |                 |   |   | placebo       | No  | 102 | 42<br>(12)      | 0.60 | 0-0     | Flexible         | 0   | HAMD 21             | 23.63 |    |               |                  |                  |                                |                     |         |         |  |  |
| Thase 2006<br>(WELL 100368)                              | 2006            | 2 | 2 | bupropion     | Yes | 171 | 37.1<br>(12.3)  | *    | 150-450 | Flexible         | 300 | HAMD 17             | 24.90 | 12 | DSM-IV        | North<br>America | Multi-<br>center | Secondary<br>/Tertiary<br>care | Outpatients<br>only | Unclear | Unclear |  |  |
|                                                          |                 |   |   | venlafaxine   | No  | 177 | 37.4<br>(11.6)  | *    | 75-225  | Flexible         | 150 | HAMD 17             | 24.10 |    |               |                  |                  |                                |                     |         |         |  |  |
| Thomson 1982                                             | 1982            | 2 | 4 | amitriptyline | No  | 31  | *               | *    | 150-150 | Fixed            | 150 | HAMD<br>unspecified | 17.35 | 12 | RDC           | Europe           | Multi-<br>center | Primary<br>care                | Outpatients<br>only | Yes     | Yes     |  |  |
|                                                          |                 |   |   | placebo       | No  | 28  | *               | *    | 0-0     | Fixed            | 0   | HAMD<br>unspecified | 19.43 |    |               |                  |                  |                                |                     |         |         |  |  |
| Tignol 1993<br>(29060/087)                               | 1993            | 2 | 2 | paroxetine    | Yes | 89  | 43<br>(11.6)    | *    | 20-20   | Fixed            | 20  | MADRS               | 30.74 | 6  | DSM-<br>III-R | Europe           | Multi-<br>center | Secondary<br>/Tertiary<br>care | Inpatients<br>only  | Yes     | Unclear |  |  |
|                                                          |                 |   |   | fluoxetine    | No  | 87  | 45<br>(13.2)    | *    | 20-20   | Fixed            | 20  | MADRS               | 31.60 |    |               |                  |                  |                                |                     |         |         |  |  |
| Timmerman<br>1993 (Study<br>89422 - FDA)                 | 1993            | 2 | 2 | fluvoxamine   | No  | 109 | *               | *    | 100-200 | Flexible         | *   | HAMD 17             | 24.50 | 6  | DSM-<br>III-R | Europe           | Multi-<br>center | Secondary<br>/Tertiary<br>care | Outpatients<br>only | Unclear | Yes     |  |  |

|                            |      |   |   |                |     |     |             |      |         |          |     |         |       |    |           |               |               |                         |                  |         |         |
|----------------------------|------|---|---|----------------|-----|-----|-------------|------|---------|----------|-----|---------|-------|----|-----------|---------------|---------------|-------------------------|------------------|---------|---------|
| and Haffmans 1996)         |      |   |   | citalopram     | Yes | 108 | *           | *    | 20-40   | Flexible | *   | HAMD 17 | 24.70 |    |           |               |               |                         |                  |         |         |
| Tollefson 1995             | 1995 | 2 | 2 | fluoxetine     | Yes | 335 | 67.4 (5.4)  | 0.54 | *-20    | Flexible | *   | HAMD 17 | 22.20 | 6  | DSM-III-R | North America | Multi-center  | Other/Unclear           | Outpatients only | Yes     | Unclear |
|                            |      |   |   | placebo        | No  | 336 | 68.1 (5.9)  | 0.55 | 0-0     | Flexible | 0   | HAMD 17 | 22.10 |    |           |               |               |                         |                  |         |         |
| Tomarken 2004              | 2004 | 2 | 2 | bupropion      | Yes | 10  | 39.4 (9.8)  | *    | 200-300 | Flexible | *   | HAMD 17 | 21.70 | 6  | DSM-IV    | North America | Single center | Secondary/Tertiary care | Outpatients only | No      | Unclear |
|                            |      |   |   | placebo        | No  | 9   | 37.5 (7.8)  | *    | 0-0     | Flexible | 0   | HAMD 17 | 21.70 |    |           |               |               |                         |                  |         |         |
| Tourian 2009 (NCT00384033) | 2009 | 4 | 4 | desvenlafaxine | Yes | 155 | 41 (13)     |      | 50-50   | Fixed    | 50  | HAMD 17 | 23    | 8  | DSM-IV    | North America | Multi-center  | Other/Unclear           | Outpatients only | No      | Unclear |
|                            |      |   |   | desvenlafaxine | Yes | 160 | 39 (12)     |      | 100-100 | Fixed    | 100 | HAMD 17 | 23    |    |           |               |               |                         |                  |         |         |
|                            |      |   |   | duloxetine     | No  | 159 | 39 (12)     |      | 60-60   | Fixed    | 60  | HAMD 17 | 23    |    |           |               |               |                         |                  |         |         |
|                            |      |   |   | placebo        | No  | 164 | 39 (13)     |      | 0-0     | Fixed    | 0   | HAMD 17 | 24    |    |           |               |               |                         |                  |         |         |
| Trivedi 2004 (29060/810)   | 2004 | 2 | 3 | placebo        | No  | 149 | 38.4 (11.7) | *    | 0-0     | Fixed    | 0   | HAMD 17 | 23.80 | 8  | DSM-IV    | North America | Multi-center  | Other/Unclear           | Other/Unclear    | Yes     | Unclear |
|                            |      |   |   | paroxetine     | Yes | 154 | 39.4 (10.8) | *    | 25-25   | Fixed    | 25  | HAMD 17 | 23.50 |    |           |               |               |                         |                  |         |         |
| Tsutsui 2000               | 2000 | 2 | 2 | paroxetine     | Yes | 116 | 39.1 (13.9) | *    | 10-40   | Flexible | 32  | HAMD 17 | 23.60 | 6  | DSM-IV    | Asia          | Multi-center  | Both                    | Both             | No      | Yes     |
|                            |      |   |   | trazodone      | No  | 109 | 38.5 (12.7) | *    | 75-200  | Flexible | 154 | HAMD 17 | 24.40 |    |           |               |               |                         |                  |         |         |
| Tylee 1997                 | 1997 | 2 | 2 | fluoxetine     | No  | 170 | 45.5 (14.3) | 0.75 | 20-20   | Fixed    | 20  | HAMD 17 | 22.50 | 12 | DSM-IV    | Europe        | Multi-center  | Primary care            | Outpatients only | Unclear | Unclear |
|                            |      |   |   | venlafaxine    | Yes | 171 | 43.5 (14)   | 0.68 | 75-75   | Fixed    | 75  | HAMD 17 | 22.40 |    |           |               |               |                         |                  |         |         |
| Tzanakaki 2000             | 2000 | 2 | 2 | fluoxetine     | No  | 54  | 49 (10)     | *    | 20-60   | Flexible | *   | HAMD 21 | 27.10 | 6  | DSM-IV    | Europe        | Multi-center  | Secondary/Tertiary care | Both             | Yes     | Unclear |
|                            |      |   |   | venlafaxine    | Yes | 55  | 47 (11)     | *    | 75-225  | Flexible | *   | HAMD 21 | 27.80 |    |           |               |               |                         |                  |         |         |
| Upward 1988                | 1988 | 2 | 2 | fluoxetine     | Yes | 13  | 40 (10.6)   | 0.55 | 60-80   | Flexible | 75  | *       | *     | 4  | *         | Europe        | Unclear       | Other/Unclear           | Outpatients only | Yes     | Yes     |
|                            |      |   |   | amitriptyline  | No  | 14  | 45 (13.2)   | 0.58 | 150-200 | Flexible | 183 | *       | *     |    |           |               |               |                         |                  |         |         |
| Van de Merwe 1984          | 1984 | 3 | 3 | amitriptyline  | No  | 5   | *           | *    | 100-150 | Flexible | *   | HAMD 17 | *     | 4  | RDC       | Europe        | Single center | Secondary/Tertiary care | Outpatients only | Yes     | Yes     |
|                            |      |   |   | placebo        | No  | 3   | *           | *    | 0-0     | Flexible | 0   | HAMD 17 | *     |    |           |               |               |                         |                  |         |         |
|                            |      |   |   | trazodone      | Yes | 6   | *           | *    | 50-300  | Flexible | *   | HAMD 17 | *     |    |           |               |               |                         |                  |         |         |
| VanMoffaert 1995a          | 1995 | 2 | 2 | sertraline     | Yes | 83  | 46.1 (*)    | *    | 50-100  | Flexible | *   | HAMD 17 | 24.50 | 8  | DSM-III-R | Europe        | Multi-center  | Secondary/Tertiary care | Other/Unclear    | Yes     | Yes     |
|                            |      |   |   | fluoxetine     | No  | 82  | 48.4 (*)    | *    | 20-40   | Flexible | *   | HAMD 17 | 23.20 |    |           |               |               |                         |                  |         |         |
| VanMoffaert 1995b          | 1995 | 2 | 2 | mirtazapine    | Yes | 100 | 46.1 (10.8) | 0.69 | 24-72   | Flexible | *   | HAMD 17 | 29.2  | 6  | DSM-III   | Europe        | Multi-center  | Secondary/Tertiary care | Inpatients only  | Unclear | Yes     |

|                                         |                 |   |   |               |     |     |                |      |         |          |     |         |       |    |           |                   |               |                         |                  |         |         |
|-----------------------------------------|-----------------|---|---|---------------|-----|-----|----------------|------|---------|----------|-----|---------|-------|----|-----------|-------------------|---------------|-------------------------|------------------|---------|---------|
|                                         |                 |   |   | trazodone     | No  | 100 | 46.3<br>(12.6) | 0.71 | 150-450 | Flexible | *   | HAMD 17 | 27.5  |    |           |                   |               |                         |                  |         |         |
| Vartiainen 1994<br>(MIR 84023<br>FDA)   | 1994            | 2 | 2 | mirtazapine   | Yes | 60  | 46 (*)         | 0.58 | 15-50   | Flexible | 33  | HAMD 21 | 25.60 | 6  | *         | Europe            | Multi-center  | Secondary/Tertiary care | Inpatients only  | Yes     | Yes     |
|                                         |                 |   |   | placebo       | No  | 57  | 46 (*)         | 0.48 | 0-0     | Flexible | 0   | HAMD 21 | 26.00 |    |           |                   |               |                         |                  |         |         |
| VEN 600A-303<br>(FDA)                   | unpublis<br>hed | 2 | 3 | venlafaxine   | Yes | 83  | 39 (*)         | 0.70 | 150-225 | Flexible | 185 | HAMD 21 | 23.63 | 6  | DSM-III-R | North America     | Single center | Other/Unclear           | Outpatients only | Yes     | Yes     |
|                                         |                 |   |   | placebo       | No  | 82  | 38 (*)         | 0.68 | 0-0     | Flexible | 0   | HAMD 21 | 24.59 |    |           |                   |               |                         |                  |         |         |
| VEN 600A-313<br>(FDA)                   | unpublis<br>hed | 3 | 4 | venlafaxine   | Yes | 76  | 38 (*)         | 0.70 | 75-75   | Fixed    | 75  | HAMD 21 | 25.57 | 6  | DSM-III-R | North America     | Unclear       | Other/Unclear           | Outpatients only | Yes     | Yes     |
|                                         |                 |   |   | venlafaxine   | Yes | 82  | 39 (*)         | 0.61 | 200-200 | Fixed    | 200 | HAMD 21 | 25.57 |    |           |                   |               |                         |                  |         |         |
|                                         |                 |   |   | placebo       | No  | 79  | 38 (*)         | 0.69 | 0-0     | Fixed    | 0   | HAMD 21 | 25.39 |    |           |                   |               |                         |                  |         |         |
| VEN XR 367<br>(FDA)                     | unpublis<br>hed | 4 | 4 | venlafaxine   | Yes | 83  | *              | 0.70 | 75-75   | Fixed    | 75  | HAMD 21 | 26.49 | 8  | DSM-III-R | Europe            | Multi-center  | Other/Unclear           | Outpatients only | Yes     | Yes     |
|                                         |                 |   |   | venlafaxine   | Yes | 82  | *              | 0.61 | 150-150 | Fixed    | 150 | HAMD 21 | 27.11 |    |           |                   |               |                         |                  |         |         |
|                                         |                 |   |   | paroxetine    | No  | 81  | *              | 0.54 | 20-20   | Fixed    | 20  | HAMD 21 | 26.13 |    |           |                   |               |                         |                  |         |         |
|                                         |                 |   |   | placebo       | No  | 83  | *              | 0.67 | 0-0     | Fixed    | 0   | HAMD 21 | 26.60 |    |           |                   |               |                         |                  |         |         |
| Ventura 2007<br>(SCT-MD-18)             | 2007            | 2 | 2 | escitalopram  | Yes | 107 | 40.6<br>(13.7) | *    | 10-10   | Fixed    | 10  | HAMD 24 | 26.80 | 8  | DSM-IV    | North America     | Multi-center  | Other/Unclear           | Outpatients only | Unclear | Unclear |
|                                         |                 |   |   | sertraline    | No  | 108 | 38.1<br>(11.5) | *    | 50-200  | Flexible | *   | HAMD 24 | 26.80 |    |           |                   |               |                         |                  |         |         |
| Versiani 1999                           | 1999            | 2 | 2 | fluoxetine    | Yes | 77  | 41.3<br>(*)    | 0.76 | 20-20   | Fixed    | 20  | HAMD 21 | 28.40 | 8  | DSM-IV    | South America     | Multi-center  | Other/Unclear           | Other/Unclear    | Yes     | No      |
|                                         |                 |   |   | amitriptyline | No  | 80  | 41.3<br>(*)    | 0.76 | 50-250  | Flexible | 138 | HAMD 21 | 27.80 |    |           |                   |               |                         |                  |         |         |
| Versiani 2000<br>(Study 091)            | 2000            | 2 | 2 | reboxetine    | Yes | 28  | 41.4<br>(*)    | 0.46 | 10-10   | Fixed    | 10  | HAMD 21 | 35.70 | 6  | DSM-III-R | Cross-Continental | Multi-center  | Secondary/Tertiary care | Inpatients only  | Yes     | No      |
|                                         |                 |   |   | placebo       | No  | 28  | 39.9<br>(*)    | 0.50 | 0-0     | Fixed    | 0   | HAMD 21 | 35.10 |    |           |                   |               |                         |                  |         |         |
| Versiani 2005                           | 2005            | 2 | 2 | mirtazapine   | Yes | 145 | 43 (*)         | *    | 15-60   | Flexible | *   | HAMD 17 | 29.00 | 8  | DSM-IV    | Cross-Continental | Multi-center  | Other/Unclear           | Other/Unclear    | Yes     | No      |
|                                         |                 |   |   | fluoxetine    | No  | 149 | 47 (*)         | *    | 20-40   | Flexible | *   | HAMD 17 | 28.00 |    |           |                   |               |                         |                  |         |         |
| Wade 2002<br>(ESC Study<br>99001 - FDA) | 2002            | 2 | 2 | placebo       | No  | 189 | 40<br>(12)     | 0.78 | 0-0     | Fixed    | 0   | MADRS   | 28.70 | 8  | DSM-IV    | Cross-Continental | Multi-center  | Primary care            | Outpatients only | Yes     | Unclear |
|                                         |                 |   |   | escitalopram  | Yes | 191 | 41<br>(11)     | 0.74 | 10-10   | Fixed    | 10  | MADRS   | 29.20 |    |           |                   |               |                         |                  |         |         |
| Wade 2003 (E-1721)                      | 2003            | 2 | 2 | mirtazapine   | Yes | 99  | 40<br>(14.3)   | *    | 15-45   | Flexible | 35  | HAMD 17 | 23.80 | 12 | DSM-IV    | Europe            | Multi-center  | Primary care            | Outpatients only | No      | No      |
|                                         |                 |   |   | paroxetine    | No  | 98  | 40<br>(11.7)   | *    | 10-30   | Flexible | 24  | HAMD 17 | 24.40 |    |           |                   |               |                         |                  |         |         |
| Wade 2007<br>(Study 10990)              | 2007            | 2 | 2 | escitalopram  | Yes | 144 | 43.3<br>(11.6) | *    | 20-20   | Fixed    | 20  | HAMD 17 | 22.70 | 8  | DSM-IV    | Cross-Continental | Multi-center  | Primary care            | Outpatients only | No      | Unclear |
|                                         |                 |   |   | duloxetine    | No  | 151 | 44.5<br>(11)   | *    | 60-60   | Fixed    | 60  | HAMD 17 | 22.70 |    |           |                   |               |                         |                  |         |         |
| Walczak 1996                            | 1996            | 4 | 5 | fluvoxamine   | Yes | 101 | *              | *    | 50-50   | Fixed    | 50  | HAMD 21 | *     | 6  | DSM-III-R | North America     | Multi-center  | Secondary/Tertiary care | Outpatients only | Yes     | No      |

|                                                              |             |   |   |               |     |     |                |      |         |          |     |                  |       |   |           |                   |               |                         |                  |         |         |
|--------------------------------------------------------------|-------------|---|---|---------------|-----|-----|----------------|------|---------|----------|-----|------------------|-------|---|-----------|-------------------|---------------|-------------------------|------------------|---------|---------|
|                                                              |             |   |   | fluvoxamine   | Yes | 100 | *              | *    | 100-100 | Fixed    | 100 | HAMD 21          | *     |   |           |                   |               |                         |                  |         |         |
|                                                              |             |   |   | fluvoxamine   | Yes | 99  | *              | *    | 150-150 | Fixed    | 150 | HAMD 21          | *     |   |           |                   |               |                         |                  |         |         |
|                                                              |             |   |   | placebo       | No  | 200 | *              | *    | 0-0     | Fixed    | 0   | HAMD 21          | *     |   |           |                   |               |                         |                  |         |         |
| Wang 2014<br>(EUCTR2005-005052-40, NCT00351169, D1448C00004) | 2014        | 2 | 3 | escitalopram  | No  | 157 | 40.3<br>(12.5) | 0.75 | 10-20   | Flexible | 11  | HAMD unspecified | 27.20 | 8 | DSM-IV    | Cross-Continental | Multi-center  | Other/Unclear           | Other/Unclear    | Unclear | Yes     |
|                                                              |             |   |   | placebo       | No  | 157 | 39.7<br>(11.1) | 0.67 | 0-0     | Flexible | 0   | HAMD unspecified | 26.60 |   |           |                   |               |                         |                  |         |         |
| Wang 2015<br>(NCT01571453, KCT0000432, 13926A)               | 2015        | 2 | 2 | vortioxetine  | Yes | 213 | 39.6<br>(12.4) | 0.58 | 10-10   | Fixed    | 10  | MADRS            | 32.30 | 8 | DSM-IV    | Asia              | Multi-center  | Secondary/Tertiary care | Both             | Unclear | Yes     |
|                                                              |             |   |   | venlafaxine   | No  | 230 | 40.7<br>(12.3) | 0.62 | 150-150 | Fixed    | 150 | MADRS            | 32.30 |   |           |                   |               |                         |                  |         |         |
| Weisler 1994                                                 | 1994        | 2 | 2 | bupropion     | Yes | 63  | 40.2<br>(*)    | *    | 225-450 | Flexible | 345 | HAMD 21          | 25.80 | 6 | DSM-III-R | North America     | Multi-center  | Secondary/Tertiary care | Outpatients only | Yes     | Unclear |
|                                                              |             |   |   | trazodone     | No  | 61  | 40.8<br>(*)    | *    | 150-400 | Flexible | 207 | HAMD 21          | 24.90 |   |           |                   |               |                         |                  |         |         |
| WELL 029                                                     | unpublished | 2 | 3 | bupropion     | Yes | 25  | 37.8<br>(*)    | 0.44 | 300-300 | Fixed    | 300 | HAMD 21          | 26.60 | 4 | *         | North America     | Multi-center  | Secondary/Tertiary care | Inpatients only  | Unclear | Unclear |
|                                                              |             |   |   | placebo       | No  | 24  | 41.5<br>(*)    | 0.50 | 0-0     | Fixed    | 0   | HAMD 21          | 26.20 |   |           |                   |               |                         |                  |         |         |
| WELL AK140016                                                | unpublished | 2 | 2 | bupropion     | Yes | 69  | 37.6<br>(10.6) | *    | 300-300 | Fixed    | 300 | HAMD 17          | 21.90 | 8 | DSM-IV    | North America     | Multi-center  | Other/Unclear           | Other/Unclear    | Unclear | Unclear |
|                                                              |             |   |   | paroxetine    | No  | 71  | 37<br>(10.8)   | *    | 20-20   | Fixed    | 20  | HAMD 17          | 22.30 |   |           |                   |               |                         |                  |         |         |
| WELL AK1A4006                                                | unpublished | 3 | 3 | fluoxetine    | No  | 155 | 38.6<br>(12)   | *    | 20-60   | Flexible | *   | HAMD 21          | 25.30 | 8 | DSM-IV    | North America     | Multi-center  | Other/Unclear           | Outpatients only | Unclear | Unclear |
|                                                              |             |   |   | bupropion     | Yes | 158 | 37.1<br>(10.7) | *    | 150-400 | Flexible | *   | HAMD 21          | 25.60 |   |           |                   |               |                         |                  |         |         |
|                                                              |             |   |   | placebo       | No  | 154 | 37.2<br>(11.2) | *    | 0-0     | Flexible | 0   | HAMD 21          | 25.20 |   |           |                   |               |                         |                  |         |         |
| Wellbutrin 06                                                | unpublished | 2 | 2 | bupropion     | Yes | 56  | 42<br>(*)      | 0.19 | 300-600 | Flexible | *   | HAMD 21          | 28.50 | 4 | *         | North America     | Multi-center  | Secondary/Tertiary care | Inpatients only  | Unclear | Unclear |
|                                                              |             |   |   | placebo       | No  | 29  | 40.7<br>(*)    | 0.26 | 0-0     | Flexible | 0   | HAMD 21          | 29.30 |   |           |                   |               |                         |                  |         |         |
| Wellbutrin 25                                                | unpublished | 3 | 3 | bupropion     | Yes | 45  | 52.4<br>(*)    | 0.49 | 300-300 | Fixed    | 300 | HAMD 21          | 32.40 | 4 | *         | North America     | Multi-center  | Secondary/Tertiary care | Inpatients only  | Unclear | Unclear |
|                                                              |             |   |   | bupropion     | Yes | 40  | 47.5<br>(*)    | 0.50 | 450-450 | Fixed    | 450 | HAMD 21          | 34.80 |   |           |                   |               |                         |                  |         |         |
|                                                              |             |   |   | placebo       | No  | 43  | 51.9<br>(*)    | 0.51 | 0-0     | Fixed    | 0   | HAMD 21          | 33.60 |   |           |                   |               |                         |                  |         |         |
| Wheatley 1998                                                | 1998        | 2 | 2 | mirtazapine   | Yes | 66  | 47.2<br>(15.3) | *    | 15-60   | Flexible | 40  | HAMD 17          | 26.00 | 6 | DSM-III   | Europe            | Multi-center  | Other/Unclear           | Both             | Yes     | No      |
|                                                              |             |   |   | fluoxetine    | No  | 67  | 47.5<br>(14.8) | *    | 20-40   | Flexible | 24  | HAMD 17          | 26.10 |   |           |                   |               |                         |                  |         |         |
| Wilcox 1994                                                  | 1994        | 2 | 3 | amitriptyline | No  | 50  | 40<br>(*)      | *    | 60-300  | Flexible | 122 | HAMD 17          | 23.8  | 6 | DSM-III   | North America     | Single center | Secondary/Tertiary care | Outpatients only | Yes     | Yes     |

|                                           |             |   |   |               |         |     |             |      |         |               |     |                  |       |   |         |               |               |                         |                  |         |         |
|-------------------------------------------|-------------|---|---|---------------|---------|-----|-------------|------|---------|---------------|-----|------------------|-------|---|---------|---------------|---------------|-------------------------|------------------|---------|---------|
|                                           |             |   |   | placebo       | No      | 49  | 40 (*)      | *    | 0-0     | Flexible      | 0   | HAMD 17          | 23.5  |   |         |               |               |                         |                  |         |         |
| Winokur 2003                              | 2003        | 2 | 2 | mirtazapine   | Yes     | 8   | 40.9 (*)    | *    | 15-45   | Flexible      | *   | HAMD 21          | 25.60 | 8 | DSM-IV  | North America | Unclear       | Other/Unclear           | Other/Unclear    | No      | No      |
|                                           |             |   |   | fluoxetine    | No      | 12  | 43.5 (*)    | *    | 20-40   | Flexible      | *   | HAMD 21          | 26.70 |   |         |               |               |                         |                  |         |         |
| Yang 2003                                 | 2003        | 2 | 2 | milnacipran   | Yes     | 27  | 43.5 (10.4) | *    | 50-100  | Flexible      | *   | HAMD 17          | 25.20 | 6 | DSM-IV  | Asia          | Multi-center  | Secondary/Tertiary care | Outpatients only | Unclear | Unclear |
|                                           |             |   |   | sertraline    | No      | 26  | 42 (8.9)    | *    | 50-100  | Flexible      | *   | HAMD 17          | 23.20 |   |         |               |               |                         |                  |         |         |
| Yevtushenko 2007                          | 2007        | 2 | 3 | escitalopram  | Yes     | 109 | 35.2 (6.5)  | 0.61 | 10-10   | Fixed         | 10  | MADRS            | 25.67 | 6 | DSM-IV  | Europe        | Multi-center  | Secondary/Tertiary care | Outpatients only | Unclear | Yes     |
|                                           |             |   |   | citalopram    | No      | 110 | 35.1 (6.5)  | 0.56 | 20-20   | Fixed         | 20  | MADRS            | 35.70 |   |         |               |               |                         |                  |         |         |
| Young 1987                                | 1987        | 2 | 2 | fluoxetine    | Unclear | 32  | 46.1 (*)    | 0.68 | 40-80   | Flexible      | 73  | HAMD unspecified | 44.00 | 6 | RDC     | Europe        | Unclear       | Secondary/Tertiary care | Outpatients only | Unclear | Yes     |
|                                           |             |   |   | amitriptyline | Unclear | 32  | 46.6 (*)    | 0.68 | 50-150  | Flexible      | 122 | HAMD unspecified | 48.10 |   |         |               |               |                         |                  |         |         |
| Zajecka 2010 (CAGO178A230 1, NCT00411099) | 2010        | 3 | 3 | agomelatine   | Yes     | 170 | 44.2 (12.3) | 0.69 | 25-25   | Fixed         | 25  | HAMD 17          | 26.70 | 8 | DSM-IV  | North America | Multi-center  | Primary care            | Outpatients only | No      | No      |
|                                           |             |   |   | agomelatine   | Yes     | 168 | 44.2 (12.3) | 0.63 | 50-50   | Fixed         | 50  | HAMD 17          | 27.10 |   |         |               |               |                         |                  |         |         |
|                                           |             |   |   | placebo       | No      | 173 | 43.1 (12)   | 0.68 | 0-0     | Fixed         | 0   | HAMD 17          | 27.10 |   |         |               |               |                         |                  |         |         |
| Zhang 2014                                | 2013        | 2 | 2 | trazodone     | No      | 192 | 39.5 (12.7) | 0.62 | 150-450 | Flexible      | 273 | HAMD 17          | 21.60 | 6 | DSM-IV  | Asia          | Multi-center  | Secondary/Tertiary care | Both             | Yes     | Unclear |
|                                           |             |   |   | placebo       | No      | 190 | 38.3 (12.2) | 0.61 | 0-0     | Flexible      | 0   | HAMD 17          | 21.90 |   |         |               |               |                         |                  |         |         |
| Zivkov 1995 (Organon 85146, FDA85146)     | 1997        | 2 | 2 | mirtazapine   | Yes     | 103 | 48.5 (10.6) | *    | *       | Other/Unclear | *   | HAMD 17          | 27.30 | 6 | DSM-III | North America | Multi-center  | Other/Unclear           | Other/Unclear    | Unclear | Unclear |
|                                           |             |   |   | amitriptyline | No      | 104 | 47.7 (12.4) | *    | *       | Other/Unclear | *   | HAMD 17          | 26.20 |   |         |               |               |                         |                  |         |         |
| 845                                       | unpublished | 2 | 3 | bupropion     | Yes     | 56  | 36.4 (*)    | 0.67 | 150-450 | Flexible      | *   | HAMD 21          | 24.60 | 6 | *       | North America | Multi-center  | Other/Unclear           | Outpatients only | Yes     | Unclear |
|                                           |             |   |   | placebo       | No      | 52  | 37.4 (*)    | 0.70 | 0-0     | Flexible      | 0   | HAMD 21          | 26.80 |   |         |               |               |                         |                  |         |         |
| 003-008 (FDA)                             | unpublished | 3 | 5 | mirtazapine   | Yes     | 30  | 38 (*)      | 0.63 | 15-15   | Fixed         | 15  | HAMD 21          | 26.00 | 6 | DSM-III | North America | Single center | Other/Unclear           | Outpatients only | Yes     | Unclear |
|                                           |             |   |   | mirtazapine   | Yes     | 30  | 40 (*)      | 0.71 | 30-30   | Fixed         | 30  | HAMD 21          | 25.50 |   |         |               |               |                         |                  |         |         |
|                                           |             |   |   | placebo       | No      | 30  | 39 (*)      | 0.61 | 0-0     | Fixed         | 0   | HAMD 21          | 25.80 |   |         |               |               |                         |                  |         |         |
| 003-042                                   | unpublished | 4 | 4 | mirtazapine   | Yes     | 70  | 41 (10.8)   | 0.71 | 15-15   | Fixed         | 15  | HAMD 21          | 25.30 | 8 | DSM-IV  | North America | Multi-center  | Other/Unclear           | Outpatients only | Yes     | Unclear |
|                                           |             |   |   | mirtazapine   | Yes     | 70  | 39.8 (10.2) | 0.56 | 30-30   | Fixed         | 30  | HAMD 21          | 24.70 |   |         |               |               |                         |                  |         |         |
|                                           |             |   |   | mirtazapine   | Yes     | 70  | 42.2 (12.9) | 0.60 | 45-45   | Fixed         | 45  | HAMD 21          | 25.00 |   |         |               |               |                         |                  |         |         |
|                                           |             |   |   | placebo       | No      | 70  | 40.8 (10.8) | 0.66 | 0-0     | Fixed         | 0   | HAMD 21          | 25.90 |   |         |               |               |                         |                  |         |         |



|                                     |                 |   |   |                  |         |     |                |      |         |                   |     |                     |       |    |               |                  |                  |                   |                     |         |         |
|-------------------------------------|-----------------|---|---|------------------|---------|-----|----------------|------|---------|-------------------|-----|---------------------|-------|----|---------------|------------------|------------------|-------------------|---------------------|---------|---------|
| 003-048                             | unpublis<br>hed | 3 | 3 | mirtazapine      | Yes     | 210 | 41.4<br>(12.1) | 0.60 | 45-45   | Fixed             | 45  | HAMD 17             | 22.30 | 8  | DSM-IV        | North<br>America | Multi-<br>center | Other/Unc<br>lear | Other/Unclea<br>r   | Yes     | Unclear |
|                                     |                 |   |   | fluoxetine       | No      | 210 | 40.8<br>(11.6) | 0.58 | 60-60   | Fixed             | 60  | HAMD 17             | 22.80 |    |               |                  |                  |                   |                     |         |         |
|                                     |                 |   |   | placebo          | No      | 72  | 40.2<br>(11.5) | 0.61 | 0-0     | Fixed             | 0   | HAMD 17             | 23.00 |    |               |                  |                  |                   |                     |         |         |
| 030A2-<br>0004/030A2-<br>0005 (FDA) | unpublis<br>hed | 2 | 3 | nefazodone       | Yes     | 76  | 44.9<br>(*)    | 0.53 | 50-250  | Flexible          | 175 | *                   | *     | 6  | DSM-III       | North<br>America | Multi-<br>center | Other/Unc<br>lear | Other/Unclea<br>r   | Unclear | Yes     |
|                                     |                 |   |   | placebo          | No      | 74  | 41.8<br>(*)    | 0.51 | 0-0     | Flexible          | 0   | *                   | *     |    |               |                  |                  |                   |                     |         |         |
| 03A0A-004A<br>(FDA)                 | unpublis<br>hed | 3 | 3 | nefazodone       | Yes     | 80  | 40.1<br>(*)    | 0.54 | 150-300 | Flexible          | 276 | HAMD 17             | 23.20 | 6  | DSM-III       | North<br>America | Multi-<br>center | Other/Unc<br>lear | Outpatients<br>only | Unclear | Yes     |
|                                     |                 |   |   | nefazodone       | Yes     | 80  | 39.6<br>(*)    | 0.63 | 300-600 | Flexible          | 514 | HAMD 17             | 23.60 |    |               |                  |                  |                   |                     |         |         |
|                                     |                 |   |   | placebo          | No      | 80  | 36.8<br>(*)    | 0.64 | 0-0     | Flexible          | 0   | HAMD 17             | 23.50 |    |               |                  |                  |                   |                     |         |         |
| 0600A1-300                          | unpublis<br>hed | 3 | * | venlafaxine      | Yes     | 58  | *              | *    | *       | Other/U<br>nclear | *   | *                   | *     | *  | *             | *                | Unclear          | Other/Unc<br>lear | Other/Unclea<br>r   | Unclear | Unclear |
|                                     |                 |   |   | amitriptyline    | No      | 52  | *              | *    | *       | Other/U<br>nclear | *   | *                   | *     |    |               |                  |                  |                   |                     |         |         |
|                                     |                 |   |   | placebo          | No      | *   | *              | *    | 0-0     | Other/U<br>nclear | 0   | *                   | *     |    |               |                  |                  |                   |                     |         |         |
| 0600A1-372                          | unpublis<br>hed | 2 | 2 | venlafaxine      | Yes     | 156 | *              | *    | *       | Other/U<br>nclear | *   | *                   | *     | 6  | DSM-IV        | North<br>America | Unclear          | Other/Unc<br>lear | Outpatients<br>only | Unclear | Unclear |
|                                     |                 |   |   | fluoxetine       | No      | 152 | *              | *    | *       | Other/U<br>nclear | *   | *                   | *     |    |               |                  |                  |                   |                     |         |         |
| 0600A-326                           | unpublis<br>hed | 2 | 2 | venlafaxine      | Unclear | 60  | *              | *    | *       | Other/U<br>nclear | *   | *                   | *     | 6  | DSM-<br>III-R | *                | *                | Other/Unc<br>lear | Other/Unclea<br>r   | Unclear | Unclear |
|                                     |                 |   |   | clomipramin<br>e | Unclear | 61  | *              | *    | *       | Other/U<br>nclear | *   | *                   | *     |    |               |                  |                  |                   |                     |         |         |
| 0600A-332                           | unpublis<br>hed | 2 | 2 | venlafaxine      | Yes     | 27  | *              | *    | *       | Other/U<br>nclear | *   | *                   | *     | 6  | DSM-<br>III-R | North<br>America | Unclear          | Other/Unc<br>lear | Outpatients<br>only | Unclear | Unclear |
|                                     |                 |   |   | fluoxetine       | No      | 24  | *              | *    | *       | Other/U<br>nclear | *   | *                   | *     |    |               |                  |                  |                   |                     |         |         |
| 0600A-347                           | unpublis<br>hed | 2 | 2 | venlafaxine      | Yes     | 63  | *              | *    | *       | Other/U<br>nclear | *   | *                   | *     | *  | *             | *                | Unclear          | Other/Unc<br>lear | Other/Unclea<br>r   | Unclear | Unclear |
|                                     |                 |   |   | fluvoxamine      | No      | 29  | *              | *    | *       | Other/U<br>nclear | *   | *                   | *     |    |               |                  |                  |                   |                     |         |         |
| 0600A-349                           | unpublis<br>hed | 2 | 2 | paroxetine       | No      | 85  | *              | *    | *       | Other/U<br>nclear | *   | *                   | *     | 8  | DSM-<br>III-R | *                | Unclear          | Other/Unc<br>lear | Other/Unclea<br>r   | Unclear | Unclear |
|                                     |                 |   |   | venlafaxine      | Yes     | 82  | *              | *    | *       | Other/U<br>nclear | *   | *                   | *     |    |               |                  |                  |                   |                     |         |         |
| 0600A-626                           | unpublis<br>hed | 2 | 2 | venlafaxine      | Yes     | 79  | *              | *    | *       | Other/U<br>nclear | *   | *                   | *     | 8  | DSM-IV        | North<br>America | Unclear          | Other/Unc<br>lear | Outpatients<br>only | Unclear | Unclear |
|                                     |                 |   |   | fluoxetine       | No      | 77  | *              | *    | *       | Other/U<br>nclear | *   | *                   | *     |    |               |                  |                  |                   |                     |         |         |
| 0600A-654                           | unpublis<br>hed | 2 | 2 | venlafaxine      | Yes     | 131 | *              | *    | *-150   | Flexible          | *   | MADRS               | *     | 12 | DSM-IV        | *                | Unclear          | Other/Unc<br>lear | Other/Unclea<br>r   | Unclear | Unclear |
|                                     |                 |   |   | fluoxetine       | No      | 135 | *              | *    | *-40    | Flexible          | *   | MADRS               | *     |    |               |                  |                  |                   |                     |         |         |
| 0600B1-367                          | unpublis<br>hed | 2 | 2 | paroxetine       | No      | 81  | *              | *    | *       | Other/U<br>nclear | *   | HAMD<br>unspecified | *     | 8  | DSM-<br>III-R | *                | Unclear          | Other/Unc<br>lear | Other/Unclea<br>r   | Unclear | Unclear |
|                                     |                 |   |   | venlafaxine      | Yes     | 165 | *              | *    | *       | Other/U<br>nclear | *   | HAMD<br>unspecified | *     |    |               |                  |                  |                   |                     |         |         |

|                         |                 |   |   |               |         |     |                 |      |         |                   |    |                     |       |   |               |                  |                  |                                |                     |         |         |  |  |  |
|-------------------------|-----------------|---|---|---------------|---------|-----|-----------------|------|---------|-------------------|----|---------------------|-------|---|---------------|------------------|------------------|--------------------------------|---------------------|---------|---------|--|--|--|
| 0600B1-384              | unpublis<br>hed | 2 | 2 | venlafaxine   | Yes     | 176 | *               | *    | *       | Other/U<br>nclear | *  | MADRS               | *     | 6 | DSM-<br>III-R | *                | Unclear          | Other/Unc<br>lear              | Other/Unclea<br>r   | Unclear | Unclear |  |  |  |
|                         |                 |   |   | placebo       | No      | 183 | *               | *    | 0-0     | Other/U<br>nclear | 0  | MADRS               | *     |   |               |                  |                  |                                |                     |         |         |  |  |  |
| 0600B1-402              | unpublis<br>hed | 2 | 2 | venlafaxine   | Yes     | 295 | *               | *    | *       | Other/U<br>nclear | *  | *                   | *     | 8 | DSM-IV        | North<br>America | Unclear          | Other/Unc<br>lear              | Outpatients<br>only | Unclear | Unclear |  |  |  |
|                         |                 |   |   | sertraline    | No      | 293 | *               | *    | *       | Other/U<br>nclear | *  | *                   | *     |   |               |                  |                  |                                |                     |         |         |  |  |  |
| 244 (EMD 68<br>843-009) | unpublis<br>hed | 2 | 3 | fluoxetine    | Unclear | 89  | *               | *    | 20-20   | Flexible          | 20 | HAMD<br>unspecified | 24.40 | 8 | DSM-IV        | North<br>America | Multi-<br>center | Other/Unc<br>lear              | Other/Unclea<br>r   | Yes     | Unclear |  |  |  |
|                         |                 |   |   | placebo       | No      | 95  | *               | *    | 0-0     | Flexible          | 0  | HAMD<br>unspecified | 24.00 |   |               |                  |                  |                                |                     |         |         |  |  |  |
| 245 (EMD 68<br>843-010) | unpublis<br>hed | 3 | 5 | vilazodone    | Yes     | 104 | *               | *    | 10-20   | Flexible          | *  | HAMD<br>17          | 23.80 | 8 | DSM-IV        | North<br>America | Multi-<br>center | Other/Unc<br>lear              | Outpatients<br>only | Yes     | Unclear |  |  |  |
|                         |                 |   |   | fluoxetine    | No      | 92  | *               | *    | 20-20   | Fixed             | 20 | HAMD<br>17          | 23.50 |   |               |                  |                  |                                |                     |         |         |  |  |  |
|                         |                 |   |   | placebo       | No      | 99  | *               | *    | 0-0     | Fixed             | 0  | HAMD<br>17          | 23.40 |   |               |                  |                  |                                |                     |         |         |  |  |  |
| 246 (SB<br>659746-003)  | unpublis<br>hed | 4 | 4 | vilazodone    | Yes     | 120 | *               | *    | 10-10   | Fixed             | 10 | HAMD<br>17          | 23.80 | 8 | DSM-IV        | North<br>America | Multi-<br>center | Other/Unc<br>lear              | Outpatients<br>only | Yes     | Unclear |  |  |  |
|                         |                 |   |   | vilazodone    | Yes     | 123 | *               | *    | 20-20   | Fixed             | 20 | HAMD<br>17          | 23.70 |   |               |                  |                  |                                |                     |         |         |  |  |  |
|                         |                 |   |   | citalopram    | No      | 117 | *               | *    | 20-20   | Fixed             | 20 | HAMD<br>17          | 23.10 |   |               |                  |                  |                                |                     |         |         |  |  |  |
|                         |                 |   |   | placebo       | No      | 129 | *               | *    | 0-0     | Fixed             | 0  | HAMD<br>17          | 23.30 |   |               |                  |                  |                                |                     |         |         |  |  |  |
| 247 (SB<br>659746-014)  | unpublis<br>hed | 2 | 2 | vilazodone    | Yes     | 109 | *               | *    | 5-20    | Flexible          | *  | HAMD<br>17          | 23.30 | 8 | DSM-IV        | North<br>America | Multi-<br>center | Other/Unc<br>lear              | Outpatients<br>only | Yes     | Unclear |  |  |  |
|                         |                 |   |   | placebo       | No      | 111 | *               | *    | 0-0     | Flexible          | 0  | HAMD<br>17          | 23.50 |   |               |                  |                  |                                |                     |         |         |  |  |  |
| 248 (SB<br>659746-002)  | unpublis<br>hed | 3 | 4 | vilazodone    | Yes     | 133 | *               | *    | 10-10   | Fixed             | 10 | HAMD<br>17          | 24.50 | 8 | DSM-IV        | North<br>America | Multi-<br>center | Other/Unc<br>lear              | Outpatients<br>only | Yes     | Unclear |  |  |  |
|                         |                 |   |   | vilazodone    | Yes     | 132 | *               | *    | 20-20   | Fixed             | 20 | HAMD<br>17          | 24.30 |   |               |                  |                  |                                |                     |         |         |  |  |  |
|                         |                 |   |   | placebo       | No      | 128 | *               | *    | 0-0     | Fixed             | 0  | HAMD<br>17          | 23.70 |   |               |                  |                  |                                |                     |         |         |  |  |  |
| 29060 07 001            | unpublis<br>hed | 3 | 3 | paroxetine    | Yes     | 13  | 40 (*)          | 0.69 | 10-60   | Flexible          | *  | HAMD<br>21          | 30.50 | 6 | DSM-III       | North<br>America | Multi-<br>center | Secondary<br>/Tertiary<br>care | Inpatients<br>only  | Yes     | Unclear |  |  |  |
|                         |                 |   |   | placebo       | No      | 12  | 45.1<br>(*)     | 0.42 | 0-0     | Flexible          | 0  | HAMD<br>21          | 28.30 |   |               |                  |                  |                                |                     |         |         |  |  |  |
|                         |                 |   |   | amitriptyline | No      | 13  | 44.6<br>(*)     | 0.62 | *       | Flexible          | *  | HAMD<br>21          | 30.40 |   |               |                  |                  |                                |                     |         |         |  |  |  |
| 29060/299               | unpublis<br>hed | 2 | 2 | paroxetine    | Yes     | 109 | 40.6<br>(12.6)  | *    | 20-50   | Flexible          | *  | HAMD<br>17          | 27.52 | 8 | ICD-10        | Europe           | Multi-<br>center | Secondary<br>/Tertiary<br>care | Inpatients<br>only  | Unclear | Unclear |  |  |  |
|                         |                 |   |   | amitriptyline | No      | 108 | 40.27<br>(12.7) | *    | 100-250 | Flexible          | *  | HAMD<br>17          | 28.16 |   |               |                  |                  |                                |                     |         |         |  |  |  |
| 29060/356               | unpublis<br>hed | 2 | 2 | paroxetine    | Yes     | 68  | 42.2<br>(1.5)   | *    | 20-20   | Fixed             | 20 | HAMD<br>17          | 24.60 | 8 | DSM-<br>III-R | Australia        | Multi-<br>center | Other/Unc<br>lear              | Both                | Unclear | Unclear |  |  |  |
|                         |                 |   |   | fluoxetine    | No      | 70  | 40.6<br>(1.5)   | *    | 20-20   | Fixed             | 20 | HAMD<br>17          | 23.80 |   |               |                  |                  |                                |                     |         |         |  |  |  |



### 3 Risk of bias table of included studies

For details about the rating criteria, see published protocol (Furukawa et al., BMJ Open 2016). ‘Stated not tested’ refers to the mention of double-blind procedures used in the methods section of a paper, but maintenance of blinding is not tested.

| StudyID              | Sequence_generation  | Allocation_concealment | Blinding_participant  | Blinding_therapist    | Blinding_assessor     | Selective_reporting_bias | Attrition_bias       |
|----------------------|----------------------|------------------------|-----------------------|-----------------------|-----------------------|--------------------------|----------------------|
| 1. Aberg-Wisted 2000 | Unclear risk of bias | Unclear risk of bias   | Stated but not tested | Stated but not tested | Stated but not tested | Unclear risk of bias     | Low risk of bias     |
| 2. Aguglia 1993      | Unclear risk of bias | Unclear risk of bias   | Stated but not tested | Stated but not tested | Stated but not tested | Low risk of bias         | High risk of bias    |
| 3. AK1102365         | Unclear risk of bias | Unclear risk of bias   | Stated but not tested | Stated but not tested | Stated but not tested | Low risk of bias         | High risk of bias    |
| 4. Alexopoulos 2004  | Unclear risk of bias | Unclear risk of bias   | Stated but not tested | Stated but not tested | Unclear risk of bias  | Low risk of bias         | Unclear risk of bias |
| 5. Allard 2004       | Unclear risk of bias | Unclear risk of bias   | Stated but not tested | Stated but not tested | Stated but not tested | Unclear risk of bias     | Unclear risk of bias |
| 6. Altamura 1989b    | Unclear risk of bias | Unclear risk of bias   | Stated but not tested | Stated but not tested | Unclear risk of bias  | Low risk of bias         | Low risk of bias     |
| 7. Alvarez 2012      | Low risk of bias     | Low risk of bias       | Stated but not tested | Stated but not tested | Stated but not tested | Low risk of bias         | High risk of bias    |
| 8. Alves 1999        | Low risk of bias     | Low risk of bias       | Stated but not tested | Stated but not tested | Unclear risk of bias  | Low risk of bias         | Unclear risk of bias |
| 9. Amin 1984         | Unclear risk of bias | Unclear risk of bias   | Unclear risk of bias  | Unclear risk of bias  | Unclear risk of bias  | Unclear risk of bias     | Unclear risk of bias |
| 10. Amini 2005       | Unclear risk of bias | Unclear risk of bias   | Stated but not tested | Stated but not tested | Unclear risk of bias  | Low risk of bias         | Low risk of bias     |
| 11. Amsterdam 1986   | Unclear risk of bias | Unclear risk of bias   | Stated but not tested | Stated but not tested | Unclear risk of bias  | Low risk of bias         | High risk of bias    |
| 12. Andersen 1986    | Unclear risk of bias | Unclear risk of bias   | Stated but not tested | Stated but not tested | Unclear risk of bias  | Low risk of bias         | Low risk of bias     |
| 13. Ansseau 1989a    | Unclear risk of bias | Unclear risk of bias   | Stated but not tested | Stated but not tested | Unclear risk of bias  | Unclear risk of bias     | High risk of bias    |
| 14. Ansseau 1989b    | Unclear risk of bias | Unclear risk of bias   | Stated but not tested | Stated but not tested | Unclear risk of bias  | Low risk of bias         | Low risk of bias     |
| 15. Ansseau 1991     | Unclear risk of bias | Unclear risk of bias   | Stated but not tested | Stated but not tested | Unclear risk of bias  | Low risk of bias         | High risk of bias    |
| 16. Ansseau 1994a    | Unclear risk of bias | Unclear risk of bias   | Stated but not tested | Stated but not tested | Unclear risk of bias  | Low risk of bias         | Unclear risk of bias |
| 17. Ansseau 1994b    | Low risk of bias     | Unclear risk of bias   | Stated but not tested | Stated but not tested | Unclear risk of bias  | Low risk of bias         | Unclear risk of bias |
| 18. Ansseau 1994c    | Unclear risk of bias | Unclear risk of bias   | Stated but not tested | Stated but not tested | Unclear risk of bias  | Low risk of bias         | High risk of bias    |
| 19. Armitage 1997    | Unclear risk of bias | Unclear risk of bias   | Stated but not tested | Stated but not tested | Unclear risk of bias  | Low risk of bias         | Unclear risk of bias |
| 20. Asnis 2013       | Low risk of bias     | Unclear risk of bias   | Stated but not tested | Stated but not tested | Stated but not tested | Low risk of bias         | High risk of bias    |
| 21. Bakish 1992      | Unclear risk of bias | Unclear risk of bias   | Stated but not tested | Stated but not tested | Unclear risk of bias  | Low risk of bias         | High risk of bias    |
| 22. Bakish 1997      | Unclear risk of bias | Unclear risk of bias   | Stated but not tested | Stated but not tested | Unclear risk of bias  | High risk of bias        | Unclear risk of bias |
| 23. Bakish 2014      | Low risk of bias     | Low risk of bias       | Stated but not tested | Stated but not tested | Stated but not tested | Low risk of bias         | Unclear risk of bias |

|     |                   |                      |                      |                       |                       |                       |                      |                      |
|-----|-------------------|----------------------|----------------------|-----------------------|-----------------------|-----------------------|----------------------|----------------------|
| 24. | Baldwin 1996      | Unclear risk of bias | Unclear risk of bias | Stated but not tested | Stated but not tested | Unclear risk of bias  | Low risk of bias     | Unclear risk of bias |
| 25. | Baldwin 2006a     | Unclear risk of bias | Unclear risk of bias | Stated but not tested | Stated but not tested | Unclear risk of bias  | Low risk of bias     | High risk of bias    |
| 26. | Baldwin 2006b     | Low risk of bias     | Low risk of bias     | Stated but not tested | Stated but not tested | Unclear risk of bias  | Low risk of bias     | Low risk of bias     |
| 27. | Baldwin 2012      | Low risk of bias     | Low risk of bias     | Stated but not tested | Stated but not tested | Stated but not tested | Low risk of bias     | Unclear risk of bias |
| 28. | Ban 1998          | Unclear risk of bias | Unclear risk of bias | Stated but not tested | Stated but not tested | Unclear risk of bias  | Low risk of bias     | Low risk of bias     |
| 29. | Barber 2011       | Unclear risk of bias | Unclear risk of bias | Stated but not tested | Stated but not tested | Unclear risk of bias  | Unclear risk of bias | Unclear risk of bias |
| 30. | Battegay 1985     | Unclear risk of bias | Unclear risk of bias | Stated but not tested | Stated but not tested | Unclear risk of bias  | Unclear risk of bias | High risk of bias    |
| 31. | Beasley 1991      | Unclear risk of bias | Unclear risk of bias | Stated but not tested | Stated but not tested | Unclear risk of bias  | Low risk of bias     | Unclear risk of bias |
| 32. | Behnke 2003       | Unclear risk of bias | Unclear risk of bias | Stated but not tested | Stated but not tested | Unclear risk of bias  | Low risk of bias     | Unclear risk of bias |
| 33. | Benkert 2000      | Unclear risk of bias | Unclear risk of bias | Stated but not tested | Stated but not tested | Unclear risk of bias  | Low risk of bias     | Unclear risk of bias |
| 34. | Benkert 2006      | Unclear risk of bias | Unclear risk of bias | Stated but not tested | Stated but not tested | Stated but not tested | Low risk of bias     | Unclear risk of bias |
| 35. | Bennie1995        | Low risk of bias     | Unclear risk of bias | Stated but not tested | Stated but not tested | Unclear risk of bias  | Unclear risk of bias | Low risk of bias     |
| 36. | Berlanga 1997     | Unclear risk of bias | Unclear risk of bias | Stated but not tested | Stated but not tested | Unclear risk of bias  | Low risk of bias     | High risk of bias    |
| 37. | Berlanga 2006     | Unclear risk of bias | Unclear risk of bias | Stated but not tested | Stated but not tested | Unclear risk of bias  | Low risk of bias     | Unclear risk of bias |
| 38. | Bersani 1994      | Unclear risk of bias | Unclear risk of bias | Stated but not tested | Stated but not tested | Unclear risk of bias  | Low risk of bias     | Low risk of bias     |
| 39. | Bhatia 1991       | Unclear risk of bias | Unclear risk of bias | Stated but not tested | Stated but not tested | Unclear risk of bias  | Unclear risk of bias | Unclear risk of bias |
| 40. | Bielski 2004      | Low risk of bias     | Unclear risk of bias | Stated but not tested | Stated but not tested | Unclear risk of bias  | Low risk of bias     | Unclear risk of bias |
| 41. | Bignamini 1992    | Unclear risk of bias | Unclear risk of bias | Stated but not tested | Stated but not tested | Unclear risk of bias  | Low risk of bias     | Low risk of bias     |
| 42. | Binnemann 2008    | Unclear risk of bias | Unclear risk of bias | Stated but not tested | Stated but not tested | Unclear risk of bias  | Low risk of bias     | Unclear risk of bias |
| 43. | Bjerkenstedt 2005 | Unclear risk of bias | Unclear risk of bias | Stated but not tested | Stated but not tested | Unclear risk of bias  | Low risk of bias     | Low risk of bias     |
| 44. | Blacker 1988      | Unclear risk of bias | Unclear risk of bias | Stated but not tested | Stated but not tested | Unclear risk of bias  | Low risk of bias     | Unclear risk of bias |
| 45. | Bosc 1997a        | Unclear risk of bias | Unclear risk of bias | Stated but not tested | Stated but not tested | Unclear risk of bias  | Low risk of bias     | High risk of bias    |
| 46. | Bosc 1997b        | Unclear risk of bias | Unclear risk of bias | Stated but not tested | Stated but not tested | Unclear risk of bias  | Low risk of bias     | Unclear risk of bias |
| 47. | Bose 2008         | Unclear risk of bias | Unclear risk of bias | Stated but not tested | Stated but not tested | Unclear risk of bias  | Low risk of bias     | Unclear risk of bias |
| 48. | Bougerol 1997     | Unclear risk of bias | Unclear risk of bias | Stated but not tested | Stated but not tested | Unclear risk of bias  | Low risk of bias     | Unclear risk of bias |
| 49. | Boulenger 2006    | Low risk of bias     | Unclear risk of bias | Stated but not tested | Stated but not tested | Unclear risk of bias  | Unclear risk of bias | Low risk of bias     |
| 50. | Boulenger 2014    | Low risk of bias     | Low risk of bias     | Stated but not tested | Stated but not tested | Unclear risk of bias  | Low risk of bias     | High risk of bias    |
| 51. | Boyer 2008        | Unclear risk of bias | Unclear risk of bias | Stated but not tested | Stated but not tested | Unclear risk of bias  | Low risk of bias     | Low risk of bias     |
| 52. | Bremner 1995      | Unclear risk of bias | Unclear risk of bias | Stated but not tested | Stated but not tested | Unclear risk of bias  | Low risk of bias     | Unclear risk of bias |
| 53. | Brown 1986        | Unclear risk of bias | Unclear risk of bias | Stated but not tested | Stated but not tested | Unclear risk of bias  | Unclear risk of bias | Unclear risk of bias |
| 54. | Brunoni 2012      | Low risk of bias     | Low risk of bias     | Low risk of bias      | Stated but not tested | Unclear risk of bias  | Unclear risk of bias | Low risk of bias     |



|      |                   |                      |                      |                       |                       |                       |                      |                      |
|------|-------------------|----------------------|----------------------|-----------------------|-----------------------|-----------------------|----------------------|----------------------|
| 86.  | Clerc 1994        | Unclear risk of bias | Unclear risk of bias | Stated but not tested | Stated but not tested | Unclear risk of bias  | Low risk of bias     | High risk of bias    |
| 87.  | Clerc 2001        | Unclear risk of bias | Unclear risk of bias | Stated but not tested | Stated but not tested | Unclear risk of bias  | Low risk of bias     | Unclear risk of bias |
| 88.  | CN104-002         | Unclear risk of bias | Unclear risk of bias | Stated but not tested | Stated but not tested | Unclear risk of bias  | Low risk of bias     | High risk of bias    |
| 89.  | CN104-045         | Unclear risk of bias | Unclear risk of bias | Stated but not tested | Stated but not tested | Unclear risk of bias  | High risk of bias    | Unclear risk of bias |
| 90.  | CN104-054         | Unclear risk of bias | Unclear risk of bias | Stated but not tested | Stated but not tested | Unclear risk of bias  | High risk of bias    | Unclear risk of bias |
| 91.  | Cohn 1985a        | Unclear risk of bias | Unclear risk of bias | Stated but not tested | Stated but not tested | Unclear risk of bias  | Low risk of bias     | High risk of bias    |
| 92.  | Cohn1990          | Unclear risk of bias | Unclear risk of bias | Stated but not tested | Stated but not tested | Unclear risk of bias  | Low risk of bias     | Unclear risk of bias |
| 93.  | Cohn 1996         | Unclear risk of bias | Unclear risk of bias | Stated but not tested | Stated but not tested | Unclear risk of bias  | Low risk of bias     | Unclear risk of bias |
| 94.  | Coleman 1999      | Low risk of bias     | Unclear risk of bias | Stated but not tested | Stated but not tested | Unclear risk of bias  | Low risk of bias     | High risk of bias    |
| 95.  | Coleman 2001      | Unclear risk of bias | Unclear risk of bias | Stated but not tested | Stated but not tested | Unclear risk of bias  | Low risk of bias     | Unclear risk of bias |
| 96.  | Colonna 2005      | Low risk of bias     | Low risk of bias     | Stated but not tested | Stated but not tested | Unclear risk of bias  | Unclear risk of bias | Low risk of bias     |
| 97.  | Corrigan 2000     | Unclear risk of bias | Unclear risk of bias | Stated but not tested | Stated but not tested | Unclear risk of bias  | Low risk of bias     | High risk of bias    |
| 98.  | Corruble 2013     | Low risk of bias     | Low risk of bias     | Stated but not tested | Stated but not tested | Unclear risk of bias  | Low risk of bias     | Low risk of bias     |
| 99.  | Costaesilva 1998  | Unclear risk of bias | Unclear risk of bias | Stated but not tested | Stated but not tested | Unclear risk of bias  | Low risk of bias     | Low risk of bias     |
| 100. | Croft 1999        | Unclear risk of bias | Unclear risk of bias | Stated but not tested | Stated but not tested | Stated but not tested | Low risk of bias     | Unclear risk of bias |
| 101. | Croft 2014        | Low risk of bias     | Unclear risk of bias | Stated but not tested | Stated but not tested | Unclear risk of bias  | Low risk of bias     | Low risk of bias     |
| 102. | Cunningham 1994   | Unclear risk of bias | Unclear risk of bias | Stated but not tested | Stated but not tested | Unclear risk of bias  | Low risk of bias     | Unclear risk of bias |
| 103. | Cunningham 1997   | Unclear risk of bias | Unclear risk of bias | Stated but not tested | Stated but not tested | Unclear risk of bias  | Low risk of bias     | High risk of bias    |
| 104. | Cutler 2009       | Low risk of bias     | Unclear risk of bias | Stated but not tested | Stated but not tested | Unclear risk of bias  | Low risk of bias     | Unclear risk of bias |
| 105. | Dalery 2003       | Unclear risk of bias | Unclear risk of bias | Stated but not tested | Stated but not tested | Unclear risk of bias  | Unclear risk of bias | Unclear risk of bias |
| 106. | D'Amico 1990      | Unclear risk of bias | Unclear risk of bias | Stated but not tested | Stated but not tested | Unclear risk of bias  | Low risk of bias     | Unclear risk of bias |
| 107. | Davidson 2002     | Low risk of bias     | Low risk of bias     | Stated but not tested | Stated but not tested | Unclear risk of bias  | Low risk of bias     | Unclear risk of bias |
| 108. | Debonnel 2000     | Unclear risk of bias | Unclear risk of bias | Stated but not tested | Stated but not tested | Stated but not tested | Low risk of bias     | High risk of bias    |
| 109. | Debus 1988        | Unclear risk of bias | Unclear risk of bias | Stated but not tested | Stated but not tested | Unclear risk of bias  | Low risk of bias     | High risk of bias    |
| 110. | DeMartinis 2007   | Unclear risk of bias | Unclear risk of bias | Stated but not tested | Stated but not tested | Unclear risk of bias  | Low risk of bias     | Unclear risk of bias |
| 111. | Demyttenaere 1998 | Unclear risk of bias | Unclear risk of bias | Stated but not tested | Stated but not tested | Unclear risk of bias  | Low risk of bias     | High risk of bias    |
| 112. | DeRonchi 1998     | Unclear risk of bias | Unclear risk of bias | Stated but not tested | Stated but not tested | Unclear risk of bias  | Low risk of bias     | Unclear risk of bias |
| 113. | Detke 2002a       | Unclear risk of bias | Unclear risk of bias | Stated but not tested | Stated but not tested | Unclear risk of bias  | Low risk of bias     | Unclear risk of bias |
| 114. | Detke 2002b       | Unclear risk of bias | Unclear risk of bias | Stated but not tested | Stated but not tested | Unclear risk of bias  | Low risk of bias     | Unclear risk of bias |
| 115. | Detke 2004        | Unclear risk of bias | Unclear risk of bias | Stated but not tested | Stated but not tested | Unclear risk of bias  | Low risk of bias     | Low risk of bias     |
| 116. | Deushle 2003      | Unclear risk of bias | Unclear risk of bias | Stated but not tested | Stated but not tested | Unclear risk of bias  | High risk of bias    | High risk of bias    |

|      |                |                      |                      |                       |                       |                       |                      |                      |
|------|----------------|----------------------|----------------------|-----------------------|-----------------------|-----------------------|----------------------|----------------------|
| 117. | DeWilde 1983a  | Unclear risk of bias | Unclear risk of bias | Stated but not tested | Stated but not tested | Unclear risk of bias  | Low risk of bias     | Low risk of bias     |
| 118. | DeWilde 1993   | Unclear risk of bias | Unclear risk of bias | Stated but not tested | Stated but not tested | Stated but not tested | Low risk of bias     | Unclear risk of bias |
| 119. | Dierick 1996   | Unclear risk of bias | Unclear risk of bias | Stated but not tested | Stated but not tested | Unclear risk of bias  | Low risk of bias     | Unclear risk of bias |
| 120. | Dimidjian 2006 | Low risk of bias     | Unclear risk of bias | Stated but not tested | Stated but not tested | Stated but not tested | Low risk of bias     | Unclear risk of bias |
| 121. | Dominguez 1985 | Unclear risk of bias | Unclear risk of bias | Stated but not tested | Stated but not tested | Stated but not tested | Low risk of bias     | High risk of bias    |
| 122. | Doogan 1994    | Low risk of bias     | Low risk of bias     | Stated but not tested | Stated but not tested | Unclear risk of bias  | Unclear risk of bias | Unclear risk of bias |
| 123. | DUAG 1990      | Unclear risk of bias | Unclear risk of bias | Stated but not tested | Stated but not tested | Unclear risk of bias  | Low risk of bias     | High risk of bias    |
| 124. | Dube 2010      | Unclear risk of bias | Unclear risk of bias | Stated but not tested | Stated but not tested | Unclear risk of bias  | Low risk of bias     | Unclear risk of bias |
| 125. | Dunbar 1993a   | Unclear risk of bias | Unclear risk of bias | Stated but not tested | Stated but not tested | Unclear risk of bias  | Low risk of bias     | Unclear risk of bias |
| 126. | Dunbar 1993b   | Unclear risk of bias | Unclear risk of bias | Stated but not tested | Stated but not tested | Unclear risk of bias  | Low risk of bias     | Unclear risk of bias |
| 127. | Dunbar 1993c   | Unclear risk of bias | Unclear risk of bias | Stated but not tested | Stated but not tested | Unclear risk of bias  | Low risk of bias     | High risk of bias    |
| 128. | Dunbar 1993d   | Unclear risk of bias | Unclear risk of bias | Stated but not tested | Stated but not tested | Unclear risk of bias  | Low risk of bias     | Unclear risk of bias |
| 129. | Dunlop 2011    | Unclear risk of bias | Unclear risk of bias | Stated but not tested | Stated but not tested | Unclear risk of bias  | Low risk of bias     | Unclear risk of bias |
| 130. | Dunner 1992    | Unclear risk of bias | Unclear risk of bias | Stated but not tested | Stated but not tested | Unclear risk of bias  | Low risk of bias     | Unclear risk of bias |
| 131. | E-1569         | Unclear risk of bias | Unclear risk of bias | Stated but not tested | Stated but not tested | Stated but not tested | Low risk of bias     | Low risk of bias     |
| 132. | Edwards 1989   | Unclear risk of bias | Unclear risk of bias | Low risk of bias      | Stated but not tested | Unclear risk of bias  | Low risk of bias     | High risk of bias    |
| 133. | Ekselius 1997  | Unclear risk of bias | Unclear risk of bias | Stated but not tested | Stated but not tested | Stated but not tested | Unclear risk of bias | Low risk of bias     |
| 134. | Faber 1995     | Low risk of bias     | Unclear risk of bias | Stated but not tested | Stated but not tested | Unclear risk of bias  | Low risk of bias     | High risk of bias    |
| 135. | Fabre 1979     | Unclear risk of bias | Unclear risk of bias | Stated but not tested | Stated but not tested | Unclear risk of bias  | Unclear risk of bias | Unclear risk of bias |
| 136. | Fabre 1996     | Unclear risk of bias | Unclear risk of bias | Stated but not tested | Stated but not tested | Stated but not tested | Low risk of bias     | Unclear risk of bias |
| 137. | Falk 1989      | Unclear risk of bias | Unclear risk of bias | Stated but not tested | Stated but not tested | Unclear risk of bias  | Low risk of bias     | High risk of bias    |
| 138. | Fang 1997      | Unclear risk of bias | Unclear risk of bias | Stated but not tested | Stated but not tested | Unclear risk of bias  | High risk of bias    | Unclear risk of bias |
| 139. | Fava 1998      | Unclear risk of bias | Unclear risk of bias | Stated but not tested | Stated but not tested | Unclear risk of bias  | Low risk of bias     | Unclear risk of bias |
| 140. | Fava 2002      | Unclear risk of bias | Unclear risk of bias | Stated but not tested | Stated but not tested | Unclear risk of bias  | Low risk of bias     | Unclear risk of bias |
| 141. | Fava 2005      | Unclear risk of bias | Unclear risk of bias | Stated but not tested | Stated but not tested | Unclear risk of bias  | Low risk of bias     | Unclear risk of bias |
| 142. | Fawcett 1989   | Unclear risk of bias | Unclear risk of bias | Stated but not tested | Stated but not tested | Unclear risk of bias  | Low risk of bias     | High risk of bias    |
| 143. | Feiger 1996    | Unclear risk of bias | Unclear risk of bias | Stated but not tested | Stated but not tested | Unclear risk of bias  | Low risk of bias     | Unclear risk of bias |
| 144. | Feighner 1979  | Low risk of bias     | Unclear risk of bias | Stated but not tested | Stated but not tested | Unclear risk of bias  | Low risk of bias     | Unclear risk of bias |
| 145. | Feighner 1980  | Unclear risk of bias | Unclear risk of bias | Stated but not tested | Stated but not tested | Unclear risk of bias  | Unclear risk of bias | High risk of bias    |
| 146. | Feighner 1984  | Unclear risk of bias | Unclear risk of bias | Stated but not tested | Stated but not tested | Unclear risk of bias  | Low risk of bias     | Unclear risk of bias |
| 147. | Feighner 1989a | Unclear risk of bias | Unclear risk of bias | Stated but not tested | Stated but not tested | Unclear risk of bias  | Low risk of bias     | High risk of bias    |





|      |                    |                      |                      |                       |                       |                       |                      |                      |
|------|--------------------|----------------------|----------------------|-----------------------|-----------------------|-----------------------|----------------------|----------------------|
| 179. | Griebel 2012b      | Unclear risk of bias | Unclear risk of bias | Stated but not tested | Stated but not tested | Unclear risk of bias  | Low risk of bias     | Unclear risk of bias |
| 180. | Grunebaum 2011     | Low risk of bias     | Low risk of bias     | Stated but not tested | Stated but not tested | Stated but not tested | Low risk of bias     | High risk of bias    |
| 181. | GSK14              | Unclear risk of bias | Unclear risk of bias | Stated but not tested | Stated but not tested | Unclear risk of bias  | Low risk of bias     | High risk of bias    |
| 182. | Guelfi 1995        | Unclear risk of bias | Unclear risk of bias | Stated but not tested | Stated but not tested | Stated but not tested | Low risk of bias     | High risk of bias    |
| 183. | Guelfi 1998        | Low risk of bias     | Unclear risk of bias | Stated but not tested | Stated but not tested | Stated but not tested | Low risk of bias     | Unclear risk of bias |
| 184. | Guillibert 1989    | Unclear risk of bias | Unclear risk of bias | Stated but not tested | Stated but not tested | Unclear risk of bias  | Low risk of bias     | Unclear risk of bias |
| 185. | Hackett 1998       | Unclear risk of bias | Unclear risk of bias | Stated but not tested | Stated but not tested | Unclear risk of bias  | Unclear risk of bias | High risk of bias    |
| 186. | Hale 2010          | Low risk of bias     | Low risk of bias     | Stated but not tested | Stated but not tested | Unclear risk of bias  | Low risk of bias     | Low risk of bias     |
| 187. | Halikas 1995       | Unclear risk of bias | Unclear risk of bias | Stated but not tested | Stated but not tested | Unclear risk of bias  | Low risk of bias     | High risk of bias    |
| 188. | Hao 2014           | Unclear risk of bias | Unclear risk of bias | Stated but not tested | Stated but not tested | Stated but not tested | Unclear risk of bias | Unclear risk of bias |
| 189. | Harris 1991        | Unclear risk of bias | Unclear risk of bias | Stated but not tested | Stated but not tested | Unclear risk of bias  | Low risk of bias     | Unclear risk of bias |
| 190. | Heiligenstein 1994 | Low risk of bias     | Unclear risk of bias | Stated but not tested | Stated but not tested | Unclear risk of bias  | Low risk of bias     | Unclear risk of bias |
| 191. | Heller 2009        | Unclear risk of bias | Unclear risk of bias | Stated but not tested | Stated but not tested | Unclear risk of bias  | Unclear risk of bias | High risk of bias    |
| 192. | Henigsberg 2012    | Unclear risk of bias | Unclear risk of bias | Stated but not tested | Stated but not tested | Unclear risk of bias  | Low risk of bias     | Low risk of bias     |
| 193. | Heun 2013          | Unclear risk of bias | Low risk of bias     | Stated but not tested | Stated but not tested | Unclear risk of bias  | Low risk of bias     | Unclear risk of bias |
| 194. | Hewett 2009        | Unclear risk of bias | Unclear risk of bias | Stated but not tested | Stated but not tested | Unclear risk of bias  | Low risk of bias     | Low risk of bias     |
| 195. | Hewett 2010a       | Unclear risk of bias | Unclear risk of bias | Stated but not tested | Stated but not tested | Unclear risk of bias  | Low risk of bias     | Unclear risk of bias |
| 196. | Hewett 2010b       | Unclear risk of bias | Unclear risk of bias | Stated but not tested | Stated but not tested | Unclear risk of bias  | Low risk of bias     | Unclear risk of bias |
| 197. | Hicks 1988         | Low risk of bias     | Unclear risk of bias | Stated but not tested | Stated but not tested | Unclear risk of bias  | Low risk of bias     | High risk of bias    |
| 198. | Hicks 2002         | Unclear risk of bias | Unclear risk of bias | Stated but not tested | Stated but not tested | Unclear risk of bias  | Low risk of bias     | Low risk of bias     |
| 199. | Higuchi 2014       | Unclear risk of bias | Unclear risk of bias | Stated but not tested | Stated but not tested | Stated but not tested | Unclear risk of bias | Low risk of bias     |
| 200. | Higuchi 2009       | Low risk of bias     | Low risk of bias     | Stated but not tested | Stated but not tested | Stated but not tested | Low risk of bias     | Low risk of bias     |
| 201. | Higuchi 2011       | Unclear risk of bias | Unclear risk of bias | Stated but not tested | Stated but not tested | Unclear risk of bias  | Low risk of bias     | Low risk of bias     |
| 202. | Hirayasu 2011a     | Unclear risk of bias | Unclear risk of bias | Stated but not tested | Stated but not tested | Stated but not tested | Low risk of bias     | Low risk of bias     |
| 203. | Hirayasu 2011b     | Unclear risk of bias | Unclear risk of bias | Stated but not tested | Stated but not tested | Stated but not tested | Low risk of bias     | Low risk of bias     |
| 204. | Hong 2003          | Unclear risk of bias | Unclear risk of bias | Stated but not tested | Stated but not tested | Unclear risk of bias  | Low risk of bias     | High risk of bias    |
| 205. | Hormazabal 1985    | Unclear risk of bias | Unclear risk of bias | Stated but not tested | Stated but not tested | Unclear risk of bias  | Low risk of bias     | Low risk of bias     |
| 206. | Hosseini 2015      | Unclear risk of bias | Unclear risk of bias | Stated but not tested | Stated but not tested | Unclear risk of bias  | Low risk of bias     | High risk of bias    |
| 207. | Hoyberg 1996       | Low risk of bias     | Unclear risk of bias | Stated but not tested | Stated but not tested | Unclear risk of bias  | Low risk of bias     | Unclear risk of bias |
| 208. | Hsu 2011           | Unclear risk of bias | Unclear risk of bias | Stated but not tested | Stated but not tested | Unclear risk of bias  | Unclear risk of bias | Unclear risk of bias |
| 209. | Hu 2009            | Unclear risk of bias | Unclear risk of bias | Stated but not tested | Stated but not tested | Unclear risk of bias  | Unclear risk of bias | Unclear risk of bias |

|      |                       |                      |                      |                       |                       |                       |                      |                      |
|------|-----------------------|----------------------|----------------------|-----------------------|-----------------------|-----------------------|----------------------|----------------------|
| 210. | Hunter 2010 (Study 1) | Unclear risk of bias | Unclear risk of bias | Stated but not tested | Stated but not tested | Unclear risk of bias  | High risk of bias    | Unclear risk of bias |
| 211. | Hunter 2010 (Study 2) | Unclear risk of bias | Unclear risk of bias | Stated but not tested | Stated but not tested | Unclear risk of bias  | High risk of bias    | Unclear risk of bias |
| 212. | Hunter 2010 (Study 3) | Unclear risk of bias | Unclear risk of bias | Stated but not tested | Stated but not tested | Unclear risk of bias  | High risk of bias    | Unclear risk of bias |
| 213. | Hutchinson 1992       | Unclear risk of bias | Unclear risk of bias | Stated but not tested | Stated but not tested | Unclear risk of bias  | Low risk of bias     | High risk of bias    |
| 214. | Itil 1983             | Unclear risk of bias | Unclear risk of bias | Stated but not tested | Stated but not tested | Unclear risk of bias  | Unclear risk of bias | Unclear risk of bias |
| 215. | Iwata 2013            | Unclear risk of bias | Low risk of bias     | Stated but not tested | Stated but not tested | Unclear risk of bias  | Low risk of bias     | Low risk of bias     |
| 216. | Jacobsen 2015         | Unclear risk of bias | Unclear risk of bias | Stated but not tested | Stated but not tested | Unclear risk of bias  | Low risk of bias     | Low risk of bias     |
| 217. | Jain 2013             | Low risk of bias     | Low risk of bias     | Stated but not tested | Stated but not tested | Unclear risk of bias  | Low risk of bias     | Low risk of bias     |
| 218. | Jefferson 2000        | Unclear risk of bias | Unclear risk of bias | Stated but not tested | Stated but not tested | Unclear risk of bias  | Low risk of bias     | High risk of bias    |
| 219. | Jefferson 2006        | Unclear risk of bias | Unclear risk of bias | Stated but not tested | Stated but not tested | Unclear risk of bias  | Low risk of bias     | Unclear risk of bias |
| 220. | Jiang 2009            | Unclear risk of bias | Unclear risk of bias | Stated but not tested | Stated but not tested | Stated but not tested | Low risk of bias     | Low risk of bias     |
| 221. | Judd 1993             | Unclear risk of bias | Unclear risk of bias | Stated but not tested | Stated but not tested | Unclear risk of bias  | Low risk of bias     | Unclear risk of bias |
| 222. | Kamijima 2013         | Unclear risk of bias | Unclear risk of bias | Stated but not tested | Stated but not tested | Stated but not tested | Low risk of bias     | Low risk of bias     |
| 223. | Kane 1983             | Unclear risk of bias | Unclear risk of bias | Stated but not tested | Stated but not tested | Unclear risk of bias  | Low risk of bias     | Low risk of bias     |
| 224. | Kasper 2005a          | Unclear risk of bias | Unclear risk of bias | Stated but not tested | Stated but not tested | Unclear risk of bias  | Low risk of bias     | High risk of bias    |
| 225. | Kasper 2005b          | Unclear risk of bias | Unclear risk of bias | Stated but not tested | Stated but not tested | Unclear risk of bias  | Low risk of bias     | Low risk of bias     |
| 226. | Kasper 2012           | Low risk of bias     | Unclear risk of bias | Stated but not tested | Stated but not tested | Stated but not tested | Low risk of bias     | High risk of bias    |
| 227. | Katona 2012           | Low risk of bias     | Low risk of bias     | Stated but not tested | Stated but not tested | Unclear risk of bias  | Low risk of bias     | Low risk of bias     |
| 228. | Katz 1993a            | Unclear risk of bias | Unclear risk of bias | Stated but not tested | Stated but not tested | Unclear risk of bias  | Unclear risk of bias | Unclear risk of bias |
| 229. | Katz 1993b            | Unclear risk of bias | Unclear risk of bias | Stated but not tested | Stated but not tested | Unclear risk of bias  | Unclear risk of bias | Unclear risk of bias |
| 230. | Katz 2004             | Unclear risk of bias | Unclear risk of bias | Stated but not tested | Stated but not tested | Unclear risk of bias  | Low risk of bias     | Low risk of bias     |
| 231. | Kavoussi 1997         | Unclear risk of bias | Unclear risk of bias | Stated but not tested | Stated but not tested | Stated but not tested | Unclear risk of bias | Low risk of bias     |
| 232. | Keegan 1991           | Unclear risk of bias | Unclear risk of bias | Stated but not tested | Stated but not tested | Unclear risk of bias  | Low risk of bias     | Low risk of bias     |
| 233. | Kellams 1979          | Unclear risk of bias | Unclear risk of bias | Stated but not tested | Stated but not tested | Unclear risk of bias  | Low risk of bias     | High risk of bias    |
| 234. | Keller 2006a          | Unclear risk of bias | Unclear risk of bias | Stated but not tested | Stated but not tested | Unclear risk of bias  | Unclear risk of bias | Unclear risk of bias |
| 235. | Keller 2006b          | Unclear risk of bias | Unclear risk of bias | Stated but not tested | Stated but not tested | Unclear risk of bias  | Unclear risk of bias | Unclear risk of bias |
| 236. | Keller 2006c          | Unclear risk of bias | Unclear risk of bias | Stated but not tested | Stated but not tested | Unclear risk of bias  | Low risk of bias     | Unclear risk of bias |
| 237. | Keller 2007           | Unclear risk of bias | Unclear risk of bias | Stated but not tested | Stated but not tested | Stated but not tested | Unclear risk of bias | Unclear risk of bias |
| 238. | Kennedy 2005          | Unclear risk of bias | Unclear risk of bias | Stated but not tested | Stated but not tested | Unclear risk of bias  | Low risk of bias     | High risk of bias    |
| 239. | Kennedy 2008          | Low risk of bias     | Low risk of bias     | Stated but not tested | Stated but not tested | Unclear risk of bias  | Low risk of bias     | Low risk of bias     |
| 240. | Kennedy 2014          | Unclear risk of bias | Low risk of bias     | Stated but not tested | Stated but not tested | Unclear risk of bias  | Low risk of bias     | Low risk of bias     |

|      |                             |                      |                      |                       |                       |                       |                      |                      |
|------|-----------------------------|----------------------|----------------------|-----------------------|-----------------------|-----------------------|----------------------|----------------------|
| 241. | <b>Kerkhofs 1990</b>        | Unclear risk of bias | Unclear risk of bias | Stated but not tested | Stated but not tested | Unclear risk of bias  | Unclear risk of bias | Unclear risk of bias |
| 242. | <b>Kerr 1984</b>            | Unclear risk of bias | Unclear risk of bias | Stated but not tested | Stated but not tested | Unclear risk of bias  | Unclear risk of bias | Unclear risk of bias |
| 243. | <b>Khan 1998</b>            | Unclear risk of bias | Unclear risk of bias | Stated but not tested | Stated but not tested | Unclear risk of bias  | Low risk of bias     | Unclear risk of bias |
| 244. | <b>Khan 2007</b>            | Unclear risk of bias | Unclear risk of bias | Stated but not tested | Stated but not tested | Unclear risk of bias  | Low risk of bias     | High risk of bias    |
| 245. | <b>Khan 2011</b>            | Unclear risk of bias | Unclear risk of bias | Stated but not tested | Stated but not tested | Unclear risk of bias  | Low risk of bias     | Low risk of bias     |
| 246. | <b>Kiev 1997</b>            | Unclear risk of bias | Unclear risk of bias | Stated but not tested | Stated but not tested | Unclear risk of bias  | Low risk of bias     | Unclear risk of bias |
| 247. | <b>Kinoshita 2009</b>       | Unclear risk of bias | Unclear risk of bias | Stated but not tested | Stated but not tested | Stated but not tested | Low risk of bias     | Unclear risk of bias |
| 248. | <b>Koshino 2013</b>         | Unclear risk of bias | Low risk of bias     | Stated but not tested | Stated but not tested | Stated but not tested | Low risk of bias     | Unclear risk of bias |
| 249. | <b>Kramer 1998</b>          | Unclear risk of bias | Unclear risk of bias | Stated but not tested | Stated but not tested | Unclear risk of bias  | Low risk of bias     | Unclear risk of bias |
| 250. | <b>Kuhs 1989</b>            | Unclear risk of bias | Unclear risk of bias | Stated but not tested | Stated but not tested | Unclear risk of bias  | Unclear risk of bias | Unclear risk of bias |
| 251. | <b>Kusalic 1993</b>         | Unclear risk of bias | Unclear risk of bias | Stated but not tested | Stated but not tested | Unclear risk of bias  | Unclear risk of bias | Unclear risk of bias |
| 252. | <b>Kyle 1998</b>            | Unclear risk of bias | Unclear risk of bias | Stated but not tested | Stated but not tested | Unclear risk of bias  | Unclear risk of bias | Unclear risk of bias |
| 253. | <b>Laakman 1988</b>         | Unclear risk of bias | Unclear risk of bias | Stated but not tested | Stated but not tested | Unclear risk of bias  | Unclear risk of bias | Unclear risk of bias |
| 254. | <b>Lalit 2004</b>           | Unclear risk of bias | Unclear risk of bias | Stated but not tested | Stated but not tested | Unclear risk of bias  | Low risk of bias     | High risk of bias    |
| 255. | <b>Lam 1995</b>             | Unclear risk of bias | Unclear risk of bias | Stated but not tested | Stated but not tested | Unclear risk of bias  | Low risk of bias     | Unclear risk of bias |
| 256. | <b>Langlois 1985</b>        | Unclear risk of bias | Unclear risk of bias | Stated but not tested | Stated but not tested | Unclear risk of bias  | High risk of bias    | Unclear risk of bias |
| 257. | <b>Lapierre 1980</b>        | Unclear risk of bias | Unclear risk of bias | Stated but not tested | Stated but not tested | Unclear risk of bias  | High risk of bias    | Low risk of bias     |
| 258. | <b>Lapierre 1987</b>        | Unclear risk of bias | Unclear risk of bias | Stated but not tested | Stated but not tested | Unclear risk of bias  | Low risk of bias     | High risk of bias    |
| 259. | <b>Larsen 1989</b>          | Unclear risk of bias | Unclear risk of bias | Stated but not tested | Stated but not tested | Unclear risk of bias  | Unclear risk of bias | Unclear risk of bias |
| 260. | <b>Learned 2012a Study1</b> | Unclear risk of bias | Unclear risk of bias | Stated but not tested | Stated but not tested | Unclear risk of bias  | Low risk of bias     | Unclear risk of bias |
| 261. | <b>Learned 2012b Study2</b> | Unclear risk of bias | Unclear risk of bias | Stated but not tested | Stated but not tested | Unclear risk of bias  | Low risk of bias     | Unclear risk of bias |
| 262. | <b>Leclubier 1997</b>       | Unclear risk of bias | Unclear risk of bias | Stated but not tested | Stated but not tested | Unclear risk of bias  | Low risk of bias     | Unclear risk of bias |
| 263. | <b>Lee 2007</b>             | Unclear risk of bias | Unclear risk of bias | Stated but not tested | Stated but not tested | Unclear risk of bias  | Low risk of bias     | Unclear risk of bias |
| 264. | <b>Leinonen 1997</b>        | Low risk of bias     | Unclear risk of bias | Stated but not tested | Stated but not tested | Unclear risk of bias  | Low risk of bias     | Unclear risk of bias |
| 265. | <b>Leinonen 1999</b>        | Low risk of bias     | Low risk of bias     | Stated but not tested | Stated but not tested | Unclear risk of bias  | Low risk of bias     | Low risk of bias     |
| 266. | <b>Lemoine 2007</b>         | Low risk of bias     | Low risk of bias     | Stated but not tested | Stated but not tested | Unclear risk of bias  | Low risk of bias     | High risk of bias    |
| 267. | <b>Lepine 2000</b>          | Unclear risk of bias | Unclear risk of bias | Stated but not tested | Stated but not tested | Unclear risk of bias  | Low risk of bias     | Low risk of bias     |
| 268. | <b>Lepola 2003</b>          | Unclear risk of bias | Unclear risk of bias | Stated but not tested | Stated but not tested | Stated but not tested | Low risk of bias     | Low risk of bias     |
| 269. | <b>Li 2006</b>              | Low risk of bias     | Unclear risk of bias | Stated but not tested | Stated but not tested | Unclear risk of bias  | Low risk of bias     | Unclear risk of bias |
| 270. | <b>Li 2010</b>              | Unclear risk of bias | Unclear risk of bias | Stated but not tested | Stated but not tested | Unclear risk of bias  | Unclear risk of bias | Low risk of bias     |
| 271. | <b>Lieberman 2008a</b>      | Unclear risk of bias | Unclear risk of bias | Stated but not tested | Stated but not tested | Unclear risk of bias  | Low risk of bias     | Low risk of bias     |

|      |                         |                      |                      |                       |                       |                       |                      |                      |
|------|-------------------------|----------------------|----------------------|-----------------------|-----------------------|-----------------------|----------------------|----------------------|
| 272. | Lieberman 2008b         | Unclear risk of bias | Unclear risk of bias | Stated but not tested | Stated but not tested | Unclear risk of bias  | Low risk of bias     | Low risk of bias     |
| 273. | Liebowitz 2008          | Unclear risk of bias | Unclear risk of bias | Stated but not tested | Stated but not tested | Unclear risk of bias  | Low risk of bias     | Low risk of bias     |
| 274. | Liebowitz 2013          | Low risk of bias     | Low risk of bias     | Stated but not tested | Stated but not tested | Unclear risk of bias  | Low risk of bias     | Low risk of bias     |
| 275. | Lineberry 1990          | Unclear risk of bias | Unclear risk of bias | Stated but not tested | Stated but not tested | Unclear risk of bias  | Low risk of bias     | Unclear risk of bias |
| 276. | Loo 2002                | Unclear risk of bias | Unclear risk of bias | Stated but not tested | Stated but not tested | Unclear risk of bias  | Low risk of bias     | Unclear risk of bias |
| 277. | LopezRodriguez 2004     | Unclear risk of bias | Unclear risk of bias | Stated but not tested | Stated but not tested | Stated but not tested | Unclear risk of bias | Unclear risk of bias |
| 278. | Lv 2013                 | Unclear risk of bias | Unclear risk of bias | Stated but not tested | Stated but not tested | Unclear risk of bias  | Unclear risk of bias | Unclear risk of bias |
| 279. | Lydiard 1989            | Unclear risk of bias | Unclear risk of bias | Stated but not tested | Stated but not tested | Unclear risk of bias  | Low risk of bias     | Unclear risk of bias |
| 280. | Lydiard 1997            | Unclear risk of bias | Unclear risk of bias | Stated but not tested | Stated but not tested | Unclear risk of bias  | Low risk of bias     | High risk of bias    |
| 281. | M/2020/0046             | Unclear risk of bias | Unclear risk of bias | Stated but not tested | Stated but not tested | Unclear risk of bias  | Low risk of bias     | Unclear risk of bias |
| 282. | M/2020/0047             | Unclear risk of bias | Unclear risk of bias | Stated but not tested | Stated but not tested | Unclear risk of bias  | Low risk of bias     | Unclear risk of bias |
| 283. | Mahableshwarkar 2013    | Low risk of bias     | Low risk of bias     | Stated but not tested | Stated but not tested | Unclear risk of bias  | Low risk of bias     | Unclear risk of bias |
| 284. | Mahableshwarkar 2015a   | Unclear risk of bias | Low risk of bias     | Stated but not tested | Stated but not tested | Unclear risk of bias  | Low risk of bias     | Unclear risk of bias |
| 285. | Mahableshwarkar 2015b   | Unclear risk of bias | Low risk of bias     | Stated but not tested | Stated but not tested | Stated but not tested | Low risk of bias     | Low risk of bias     |
| 286. | Mahableshwarkar 2015c   | Unclear risk of bias | Low risk of bias     | Stated but not tested | Stated but not tested | Stated but not tested | Low risk of bias     | Unclear risk of bias |
| 287. | Mann 1981               | Unclear risk of bias | Unclear risk of bias | Stated but not tested | Stated but not tested | Unclear risk of bias  | Unclear risk of bias | Unclear risk of bias |
| 288. | Manna 1989              | Unclear risk of bias | Unclear risk of bias | Stated but not tested | Stated but not tested | Unclear risk of bias  | Unclear risk of bias | Unclear risk of bias |
| 289. | Mao 2008                | Unclear risk of bias | Unclear risk of bias | Stated but not tested | Stated but not tested | Unclear risk of bias  | Low risk of bias     | Low risk of bias     |
| 290. | Mao 2015                | Low risk of bias     | Unclear risk of bias | Stated but not tested | Stated but not tested | Stated but not tested | Low risk of bias     | High risk of bias    |
| 291. | March 1990              | Low risk of bias     | Unclear risk of bias | Stated but not tested | Stated but not tested | Unclear risk of bias  | Low risk of bias     | Unclear risk of bias |
| 292. | Marchesi 1998           | Unclear risk of bias | Unclear risk of bias | Stated but not tested | Stated but not tested | Unclear risk of bias  | Low risk of bias     | Low risk of bias     |
| 293. | Masco 1985              | Unclear risk of bias | Unclear risk of bias | Stated but not tested | Stated but not tested | Unclear risk of bias  | Low risk of bias     | High risk of bias    |
| 294. | Mathews 2015            | Low risk of bias     | Unclear risk of bias | Stated but not tested | Stated but not tested | Unclear risk of bias  | Low risk of bias     | Unclear risk of bias |
| 295. | McGrath 2000            | Unclear risk of bias | Unclear risk of bias | Stated but not tested | Stated but not tested | Unclear risk of bias  | Unclear risk of bias | High risk of bias    |
| 296. | McIntyre 2014           | Low risk of bias     | Low risk of bias     | Stated but not tested | Stated but not tested | Unclear risk of bias  | Low risk of bias     | Low risk of bias     |
| 297. | McPartlin 1998          | Unclear risk of bias | Unclear risk of bias | Stated but not tested | Stated but not tested | Unclear risk of bias  | Low risk of bias     | Unclear risk of bias |
| 298. | MDF/29060/III/070/88/MC | Unclear risk of bias | Unclear risk of bias | Stated but not tested | Stated but not tested | Unclear risk of bias  | Low risk of bias     | Unclear risk of bias |
| 299. | MDUK/26090/III/83/007   | Unclear risk of bias | Unclear risk of bias | Stated but not tested | Stated but not tested | Unclear risk of bias  | Unclear risk of bias | Unclear risk of bias |
| 300. | Mehtonen 2000           | Unclear risk of bias | Unclear risk of bias | Stated but not tested | Stated but not tested | Stated but not tested | Low risk of bias     | Low risk of bias     |
| 301. | Mendels 1995            | Unclear risk of bias | Unclear risk of bias | Stated but not tested | Stated but not tested | Unclear risk of bias  | Low risk of bias     | Unclear risk of bias |

|      |                        |                      |                      |                       |                       |                       |                      |                      |
|------|------------------------|----------------------|----------------------|-----------------------|-----------------------|-----------------------|----------------------|----------------------|
| 302. | Mendels 1999           | Unclear risk of bias | Unclear risk of bias | Stated but not tested | Stated but not tested | Unclear risk of bias  | Low risk of bias     | Unclear risk of bias |
| 303. | Miller 1989            | Unclear risk of bias | Unclear risk of bias | Stated but not tested | Stated but not tested | Unclear risk of bias  | Unclear risk of bias | High risk of bias    |
| 304. | MIR 003-003            | Unclear risk of bias | Unclear risk of bias | Unclear risk of bias  | Unclear risk of bias  | Unclear risk of bias  | Low risk of bias     | Unclear risk of bias |
| 305. | MIR 003-020            | Unclear risk of bias | Unclear risk of bias | Stated but not tested | Stated but not tested | Unclear risk of bias  | Low risk of bias     | Unclear risk of bias |
| 306. | MIR 003-021            | Unclear risk of bias | Unclear risk of bias | Stated but not tested | Stated but not tested | Unclear risk of bias  | Low risk of bias     | High risk of bias    |
| 307. | MIR 84062              | Unclear risk of bias | Unclear risk of bias | Stated but not tested | Stated but not tested | Unclear risk of bias  | Unclear risk of bias | Unclear risk of bias |
| 308. | Mischoulon 2014        | Unclear risk of bias | Unclear risk of bias | Stated but not tested | Stated but not tested | Unclear risk of bias  | Low risk of bias     | Unclear risk of bias |
| 309. | Miura 2000             | Unclear risk of bias | Unclear risk of bias | Stated but not tested | Stated but not tested | Stated but not tested | Low risk of bias     | Unclear risk of bias |
| 310. | Moises 1981            | Unclear risk of bias | Unclear risk of bias | Stated but not tested | Stated but not tested | Unclear risk of bias  | Unclear risk of bias | High risk of bias    |
| 311. | Moller 1993            | Unclear risk of bias | Unclear risk of bias | Stated but not tested | Stated but not tested | Unclear risk of bias  | Low risk of bias     | Unclear risk of bias |
| 312. | Moller 1998            | Unclear risk of bias | Unclear risk of bias | Stated but not tested | Stated but not tested | Unclear risk of bias  | Low risk of bias     | Low risk of bias     |
| 313. | Moller 2000            | Unclear risk of bias | Unclear risk of bias | Stated but not tested | Stated but not tested | Unclear risk of bias  | Low risk of bias     | Low risk of bias     |
| 314. | Montgomery 1992        | Unclear risk of bias | Unclear risk of bias | Stated but not tested | Stated but not tested | Unclear risk of bias  | Low risk of bias     | Unclear risk of bias |
| 315. | Montgomery 2004a       | Unclear risk of bias | Unclear risk of bias | Stated but not tested | Stated but not tested | Stated but not tested | Low risk of bias     | Low risk of bias     |
| 316. | Montgomery 2004b       | Low risk of bias     | Low risk of bias     | Stated but not tested | Stated but not tested | Unclear risk of bias  | Low risk of bias     | Unclear risk of bias |
| 317. | Montgomery 2013        | Low risk of bias     | Low risk of bias     | Stated but not tested | Stated but not tested | Unclear risk of bias  | Low risk of bias     | Unclear risk of bias |
| 318. | Moon 1994              | Unclear risk of bias | Unclear risk of bias | Stated but not tested | Stated but not tested | Unclear risk of bias  | Low risk of bias     | Unclear risk of bias |
| 319. | Moore 2005             | Low risk of bias     | Unclear risk of bias | Stated but not tested | Stated but not tested | Stated but not tested | Low risk of bias     | Low risk of bias     |
| 320. | Moreno 2005            | Unclear risk of bias | Unclear risk of bias | Stated but not tested | Stated but not tested | Unclear risk of bias  | Unclear risk of bias | Unclear risk of bias |
| 321. | Moscovitch 2004        | Low risk of bias     | Low risk of bias     | Stated but not tested | Stated but not tested | Unclear risk of bias  | Low risk of bias     | Unclear risk of bias |
| 322. | Mullin 1996            | Unclear risk of bias | Unclear risk of bias | Stated but not tested | Stated but not tested | Unclear risk of bias  | Low risk of bias     | Unclear risk of bias |
| 323. | Mundt 2012             | Unclear risk of bias | Unclear risk of bias | Stated but not tested | Stated but not tested | Unclear risk of bias  | Low risk of bias     | Unclear risk of bias |
| 324. | Munizza 2006           | Low risk of bias     | Unclear risk of bias | Stated but not tested | Stated but not tested | Unclear risk of bias  | Low risk of bias     | Low risk of bias     |
| 325. | Murasaki 1998          | Unclear risk of bias | Unclear risk of bias | Stated but not tested | Stated but not tested | Stated but not tested | Low risk of bias     | Unclear risk of bias |
| 326. | Murasaki 2010a         | Unclear risk of bias | Unclear risk of bias | Stated but not tested | Stated but not tested | Stated but not tested | Low risk of bias     | Low risk of bias     |
| 327. | Murasaki 2010b         | Unclear risk of bias | Unclear risk of bias | Stated but not tested | Stated but not tested | Stated but not tested | Low risk of bias     | Unclear risk of bias |
| 328. | MY-1008/CPMS-076       | Unclear risk of bias | Unclear risk of bias | Stated but not tested | Stated but not tested | Unclear risk of bias  | Unclear risk of bias | Unclear risk of bias |
| 329. | MY-1042/CPMS-251       | Unclear risk of bias | Unclear risk of bias | Stated but not tested | Stated but not tested | Unclear risk of bias  | Low risk of bias     | Unclear risk of bias |
| 330. | MY-1043/BRL-029060/115 | Unclear risk of bias | Unclear risk of bias | Stated but not tested | Stated but not tested | Unclear risk of bias  | Low risk of bias     | Unclear risk of bias |
| 331. | MY-1045/BRL-029060/1   | Unclear risk of bias | Unclear risk of bias | Stated but not tested | Stated but not tested | Unclear risk of bias  | Low risk of bias     | Unclear risk of bias |

|      |                       |                      |                      |                       |                       |                       |                      |                      |
|------|-----------------------|----------------------|----------------------|-----------------------|-----------------------|-----------------------|----------------------|----------------------|
| 332. | Mynors-Wallis 1995    | Low risk of bias     | Low risk of bias     | Stated but not tested | Stated but not tested | Unclear risk of bias  | Low risk of bias     | High risk of bias    |
| 333. | NCT00822744           | Unclear risk of bias | Unclear risk of bias | Stated but not tested | Stated but not tested | Unclear risk of bias  | Unclear risk of bias | Unclear risk of bias |
| 334. | NCT01020799           | Unclear risk of bias | Unclear risk of bias | Stated but not tested | Stated but not tested | Stated but not tested | Low risk of bias     | Low risk of bias     |
| 335. | NCT01145755           | Unclear risk of bias | Unclear risk of bias | Stated but not tested | Stated but not tested | Stated but not tested | Unclear risk of bias | Unclear risk of bias |
| 336. | NCT01254305           | Unclear risk of bias | Unclear risk of bias | Stated but not tested | Stated but not tested | Stated but not tested | Unclear risk of bias | Unclear risk of bias |
| 337. | NCT01255787           | Unclear risk of bias | Unclear risk of bias | Stated but not tested | Stated but not tested | Stated but not tested | Low risk of bias     | Low risk of bias     |
| 338. | NCT01355081           | Unclear risk of bias | Unclear risk of bias | Stated but not tested | Stated but not tested | Stated but not tested | Low risk of bias     | Low risk of bias     |
| 339. | NCT01808612           | Unclear risk of bias | Unclear risk of bias | Stated but not tested | Stated but not tested | Stated but not tested | Low risk of bias     | Low risk of bias     |
| 340. | Nemeroff 1995         | Unclear risk of bias | Unclear risk of bias | Stated but not tested | Stated but not tested | Unclear risk of bias  | Low risk of bias     | High risk of bias    |
| 341. | Nemeroff 2007         | Unclear risk of bias | Unclear risk of bias | Stated but not tested | Stated but not tested | Unclear risk of bias  | Low risk of bias     | Unclear risk of bias |
| 342. | Newhouse 2000         | Unclear risk of bias | Unclear risk of bias | Stated but not tested | Stated but not tested | Unclear risk of bias  | Low risk of bias     | Unclear risk of bias |
| 343. | Nierenberg 2007       | Low risk of bias     | Low risk of bias     | Stated but not tested | Stated but not tested | Unclear risk of bias  | Low risk of bias     | Unclear risk of bias |
| 344. | Ninan 2003            | Unclear risk of bias | Unclear risk of bias | Stated but not tested | Stated but not tested | Unclear risk of bias  | Low risk of bias     | Unclear risk of bias |
| 345. | NKD20006              | Unclear risk of bias | Low risk of bias     | Stated but not tested | Stated but not tested | Unclear risk of bias  | Low risk of bias     | High risk of bias    |
| 346. | Noguera 1991          | Unclear risk of bias | Unclear risk of bias | Stated but not tested | Stated but not tested | Unclear risk of bias  | Low risk of bias     | Unclear risk of bias |
| 347. | Norton 1984           | Unclear risk of bias | Unclear risk of bias | Stated but not tested | Stated but not tested | Unclear risk of bias  | Low risk of bias     | Low risk of bias     |
| 348. | Oakes 2012a           | Low risk of bias     | Low risk of bias     | Stated but not tested | Stated but not tested | Stated but not tested | Unclear risk of bias | Unclear risk of bias |
| 349. | Oakes 2012b           | Low risk of bias     | Low risk of bias     | Stated but not tested | Stated but not tested | Stated but not tested | Unclear risk of bias | Unclear risk of bias |
| 350. | Olie 1997             | Unclear risk of bias | Unclear risk of bias | Stated but not tested | Stated but not tested | Unclear risk of bias  | Low risk of bias     | Unclear risk of bias |
| 351. | Olie 2007             | Low risk of bias     | Low risk of bias     | Stated but not tested | Stated but not tested | Unclear risk of bias  | Low risk of bias     | Low risk of bias     |
| 352. | Ontiveros 1994        | Unclear risk of bias | Unclear risk of bias | Stated but not tested | Stated but not tested | Unclear risk of bias  | Low risk of bias     | Low risk of bias     |
| 353. | OntiverosSanchez 1998 | Unclear risk of bias | Unclear risk of bias | Stated but not tested | Stated but not tested | Unclear risk of bias  | Low risk of bias     | High risk of bias    |
| 354. | Ottevanger 1995       | Unclear risk of bias | Unclear risk of bias | Stated but not tested | Stated but not tested | Unclear risk of bias  | Low risk of bias     | Low risk of bias     |
| 355. | Ou 2010               | Low risk of bias     | Low risk of bias     | Stated but not tested | Stated but not tested | Unclear risk of bias  | Low risk of bias     | Low risk of bias     |
| 356. | PAR 01 001            | Unclear risk of bias | Unclear risk of bias | Stated but not tested | Stated but not tested | Unclear risk of bias  | Low risk of bias     | Unclear risk of bias |
| 357. | PAR 279 MDUK          | Unclear risk of bias | Unclear risk of bias | Stated but not tested | Stated but not tested | Unclear risk of bias  | Low risk of bias     | Unclear risk of bias |
| 358. | PAR 29060.308         | Unclear risk of bias | Unclear risk of bias | Stated but not tested | Stated but not tested | Unclear risk of bias  | Unclear risk of bias | Low risk of bias     |
| 359. | PAR 29060.310         | Unclear risk of bias | Unclear risk of bias | Stated but not tested | Stated but not tested | Unclear risk of bias  | Low risk of bias     | Unclear risk of bias |
| 360. | PAR 29060.314         | Unclear risk of bias | Unclear risk of bias | Stated but not tested | Stated but not tested | Unclear risk of bias  | Unclear risk of bias | High risk of bias    |
| 361. | PAR 29060.316         | Unclear risk of bias | Unclear risk of bias | Stated but not tested | Stated but not tested | Unclear risk of bias  | Unclear risk of bias | Unclear risk of bias |
| 362. | PAR 29060.318         | Unclear risk of bias | Unclear risk of bias | Stated but not tested | Stated but not tested | Unclear risk of bias  | Low risk of bias     | Low risk of bias     |

|      |                  |                      |                      |                       |                       |                      |                      |                      |
|------|------------------|----------------------|----------------------|-----------------------|-----------------------|----------------------|----------------------|----------------------|
| 363. | PAR 29060/281    | Unclear risk of bias | Unclear risk of bias | Stated but not tested | Stated but not tested | Unclear risk of bias | Low risk of bias     | High risk of bias    |
| 364. | PAR MDUK 032     | Unclear risk of bias | Unclear risk of bias | Stated but not tested | Stated but not tested | Unclear risk of bias | Low risk of bias     | Unclear risk of bias |
| 365. | Patris 1996      | Unclear risk of bias | Unclear risk of bias | Stated but not tested | Stated but not tested | Unclear risk of bias | Low risk of bias     | Low risk of bias     |
| 366. | Paykel 1988      | Low risk of bias     | Unclear risk of bias | Stated but not tested | Stated but not tested | Unclear risk of bias | Unclear risk of bias | Unclear risk of bias |
| 367. | Pelicier 1993    | Unclear risk of bias | Unclear risk of bias | Stated but not tested | Stated but not tested | Unclear risk of bias | Low risk of bias     | Unclear risk of bias |
| 368. | Perahia 2006     | Unclear risk of bias | Unclear risk of bias | Stated but not tested | Stated but not tested | Unclear risk of bias | Low risk of bias     | Low risk of bias     |
| 369. | Perahia 2008a    | Unclear risk of bias | Unclear risk of bias | Stated but not tested | Stated but not tested | Unclear risk of bias | Low risk of bias     | Low risk of bias     |
| 370. | Perahia 2008b    | Unclear risk of bias | Unclear risk of bias | Stated but not tested | Stated but not tested | Unclear risk of bias | Low risk of bias     | Unclear risk of bias |
| 371. | Pomara 2013      | Unclear risk of bias | Unclear risk of bias | Stated but not tested | Stated but not tested | Unclear risk of bias | High risk of bias    | Unclear risk of bias |
| 372. | Preskorn 1991    | Unclear risk of bias | Unclear risk of bias | Stated but not tested | Stated but not tested | Unclear risk of bias | Low risk of bias     | High risk of bias    |
| 373. | PZ/109           | Unclear risk of bias | Unclear risk of bias | Unclear risk of bias  | Unclear risk of bias  | Unclear risk of bias | Unclear risk of bias | High risk of bias    |
| 374. | PZ/111           | Unclear risk of bias | Unclear risk of bias | Unclear risk of bias  | Unclear risk of bias  | Unclear risk of bias | Unclear risk of bias | High risk of bias    |
| 375. | Quera-Salva 2010 | Low risk of bias     | Low risk of bias     | Stated but not tested | Stated but not tested | Unclear risk of bias | Low risk of bias     | Low risk of bias     |
| 376. | Raft 1981        | Unclear risk of bias | Unclear risk of bias | Stated but not tested | Stated but not tested | Unclear risk of bias | Low risk of bias     | High risk of bias    |
| 377. | Rapaport 1996    | Unclear risk of bias | Unclear risk of bias | Stated but not tested | Stated but not tested | Unclear risk of bias | Low risk of bias     | Low risk of bias     |
| 378. | Rapaport 2003    | Unclear risk of bias | Unclear risk of bias | Stated but not tested | Stated but not tested | Unclear risk of bias | Low risk of bias     | Unclear risk of bias |
| 379. | Rapaport 2009    | Unclear risk of bias | Unclear risk of bias | Stated but not tested | Stated but not tested | Unclear risk of bias | Low risk of bias     | Unclear risk of bias |
| 380. | Raskin 2007      | Unclear risk of bias | Unclear risk of bias | Stated but not tested | Stated but not tested | Unclear risk of bias | Low risk of bias     | Unclear risk of bias |
| 381. | Ravindran 1995   | Unclear risk of bias | Unclear risk of bias | Stated but not tested | Stated but not tested | Unclear risk of bias | Unclear risk of bias | High risk of bias    |
| 382. | Ravindran 1997   | Unclear risk of bias | Unclear risk of bias | Stated but not tested | Stated but not tested | Unclear risk of bias | Low risk of bias     | Unclear risk of bias |
| 383. | Reimherr 1990    | Unclear risk of bias | Unclear risk of bias | Stated but not tested | Stated but not tested | Unclear risk of bias | Low risk of bias     | Unclear risk of bias |
| 384. | Reimherr 1998    | Unclear risk of bias | Unclear risk of bias | Stated but not tested | Stated but not tested | Unclear risk of bias | Low risk of bias     | Unclear risk of bias |
| 385. | Remick 1994      | Unclear risk of bias | Unclear risk of bias | Stated but not tested | Stated but not tested | Unclear risk of bias | Low risk of bias     | High risk of bias    |
| 386. | Rickels 1982     | Unclear risk of bias | Unclear risk of bias | Stated but not tested | Stated but not tested | Unclear risk of bias | Unclear risk of bias | Unclear risk of bias |
| 387. | Rickels 1985     | Unclear risk of bias | Unclear risk of bias | Stated but not tested | Stated but not tested | Unclear risk of bias | Low risk of bias     | High risk of bias    |
| 388. | Rickels 1994     | Unclear risk of bias | Unclear risk of bias | Stated but not tested | Stated but not tested | Unclear risk of bias | Low risk of bias     | Unclear risk of bias |
| 389. | Rickels 1995     | Unclear risk of bias | Unclear risk of bias | Stated but not tested | Stated but not tested | Unclear risk of bias | Low risk of bias     | Unclear risk of bias |
| 390. | Rickels 2009     | Unclear risk of bias | Unclear risk of bias | Stated but not tested | Stated but not tested | Unclear risk of bias | Low risk of bias     | Unclear risk of bias |
| 391. | Robinson 2014    | Low risk of bias     | Low risk of bias     | Stated but not tested | Stated but not tested | Unclear risk of bias | Unclear risk of bias | Unclear risk of bias |
| 392. | Roffman 1982     | Unclear risk of bias | Unclear risk of bias | Stated but not tested | Stated but not tested | Unclear risk of bias | Low risk of bias     | Unclear risk of bias |
| 393. | Roose 2004       | Low risk of bias     | Unclear risk of bias | Stated but not tested | Stated but not tested | Unclear risk of bias | Low risk of bias     | High risk of bias    |



|      |                  |                      |                      |                       |                       |                       |                      |                      |
|------|------------------|----------------------|----------------------|-----------------------|-----------------------|-----------------------|----------------------|----------------------|
| 394. | Ropert 1989      | Unclear risk of bias | Unclear risk of bias | Stated but not tested | Stated but not tested | Unclear risk of bias  | Low risk of bias     | High risk of bias    |
| 395. | Rossini 2005     | Low risk of bias     | Unclear risk of bias | Stated but not tested | Stated but not tested | Stated but not tested | Low risk of bias     | Low risk of bias     |
| 396. | Roth 1990        | Unclear risk of bias | Unclear risk of bias | Stated but not tested | Stated but not tested | Unclear risk of bias  | Unclear risk of bias | Unclear risk of bias |
| 397. | Rouillon 1991    | Unclear risk of bias | Unclear risk of bias | Stated but not tested | Stated but not tested | Unclear risk of bias  | Low risk of bias     | Unclear risk of bias |
| 398. | Rowan 1980       | Unclear risk of bias | Unclear risk of bias | Stated but not tested | Stated but not tested | Unclear risk of bias  | Low risk of bias     | Unclear risk of bias |
| 399. | Rudolph 1998     | Low risk of bias     | Unclear risk of bias | Stated but not tested | Stated but not tested | Unclear risk of bias  | Low risk of bias     | Unclear risk of bias |
| 400. | Rudolph 1999     | Low risk of bias     | Unclear risk of bias | Stated but not tested | Stated but not tested | Unclear risk of bias  | Low risk of bias     | Unclear risk of bias |
| 401. | Rush 1998        | Unclear risk of bias | Unclear risk of bias | Stated but not tested | Stated but not tested | Unclear risk of bias  | High risk of bias    | Unclear risk of bias |
| 402. | Rush 2001        | Unclear risk of bias | Unclear risk of bias | Stated but not tested | Stated but not tested | Unclear risk of bias  | Unclear risk of bias | Unclear risk of bias |
| 403. | Sacchetti 2002   | Unclear risk of bias | Unclear risk of bias | Stated but not tested | Stated but not tested | Unclear risk of bias  | Low risk of bias     | Unclear risk of bias |
| 404. | Sambunaris 2014  | Low risk of bias     | Unclear risk of bias | Stated but not tested | Stated but not tested | Stated but not tested | Low risk of bias     | Unclear risk of bias |
| 405. | Samuelian 1998   | Unclear risk of bias | Unclear risk of bias | Stated but not tested | Stated but not tested | Unclear risk of bias  | Low risk of bias     | Unclear risk of bias |
| 406. | Sauer 2003       | Unclear risk of bias | Unclear risk of bias | Stated but not tested | Stated but not tested | Unclear risk of bias  | Low risk of bias     | Unclear risk of bias |
| 407. | Schatzberg 2002  | Low risk of bias     | Unclear risk of bias | Low risk of bias      | Stated but not tested | Unclear risk of bias  | Low risk of bias     | Unclear risk of bias |
| 408. | Schatzberg 2006a | Unclear risk of bias | Unclear risk of bias | Stated but not tested | Stated but not tested | Unclear risk of bias  | Low risk of bias     | High risk of bias    |
| 409. | Schneider 2003   | Low risk of bias     | Low risk of bias     | Stated but not tested | Stated but not tested | Unclear risk of bias  | Low risk of bias     | Unclear risk of bias |
| 410. | Schoene 1993     | Unclear risk of bias | Unclear risk of bias | Stated but not tested | Stated but not tested | Stated but not tested | Low risk of bias     | Low risk of bias     |
| 411. | Schwartz 2002    | Unclear risk of bias | Unclear risk of bias | Stated but not tested | Stated but not tested | Unclear risk of bias  | Low risk of bias     | Unclear risk of bias |
| 412. | Schweizer 1994   | Unclear risk of bias | Unclear risk of bias | Stated but not tested | Stated but not tested | Unclear risk of bias  | Low risk of bias     | High risk of bias    |
| 413. | SCT-MD-09        | Unclear risk of bias | Unclear risk of bias | Stated but not tested | Stated but not tested | Unclear risk of bias  | Unclear risk of bias | Low risk of bias     |
| 414. | SCT-MD-49        | Unclear risk of bias | Unclear risk of bias | Stated but not tested | Stated but not tested | Stated but not tested | Low risk of bias     | Unclear risk of bias |
| 415. | Sechter 1999     | Unclear risk of bias | Unclear risk of bias | Stated but not tested | Stated but not tested | Unclear risk of bias  | Unclear risk of bias | Unclear risk of bias |
| 416. | Sechter 2004     | Unclear risk of bias | Unclear risk of bias | Stated but not tested | Stated but not tested | Unclear risk of bias  | Low risk of bias     | Unclear risk of bias |
| 417. | SER 101          | Unclear risk of bias | Unclear risk of bias | Stated but not tested | Stated but not tested | Unclear risk of bias  | High risk of bias    | High risk of bias    |
| 418. | SER 310          | Unclear risk of bias | Unclear risk of bias | Stated but not tested | Stated but not tested | Unclear risk of bias  | High risk of bias    | Unclear risk of bias |
| 419. | SER 315          | Unclear risk of bias | Unclear risk of bias | Stated but not tested | Stated but not tested | Unclear risk of bias  | Low risk of bias     | High risk of bias    |
| 420. | SER-CHN-1        | Unclear risk of bias | Unclear risk of bias | Stated but not tested | Stated but not tested | Unclear risk of bias  | Low risk of bias     | Low risk of bias     |
| 421. | Settle 1999      | Unclear risk of bias | Unclear risk of bias | Stated but not tested | Stated but not tested | Unclear risk of bias  | Low risk of bias     | Unclear risk of bias |
| 422. | Shaw 1986        | Unclear risk of bias | Unclear risk of bias | Stated but not tested | Stated but not tested | Unclear risk of bias  | Low risk of bias     | High risk of bias    |
| 423. | Sheehan 2009a    | Low risk of bias     | Unclear risk of bias | Stated but not tested | Stated but not tested | Stated but not tested | Low risk of bias     | Unclear risk of bias |
| 424. | Sheehan 2009b    | Unclear risk of bias | Unclear risk of bias | Stated but not tested | Stated but not tested | Unclear risk of bias  | Low risk of bias     | Unclear risk of bias |

|      |                      |                      |                      |                       |                       |                       |                      |                      |
|------|----------------------|----------------------|----------------------|-----------------------|-----------------------|-----------------------|----------------------|----------------------|
| 425. | Shelton 2006         | Unclear risk of bias | Unclear risk of bias | Stated but not tested | Stated but not tested | Unclear risk of bias  | Low risk of bias     | Low risk of bias     |
| 426. | Shipley 1981         | Unclear risk of bias | Unclear risk of bias | Stated but not tested | Stated but not tested | Unclear risk of bias  | Unclear risk of bias | Unclear risk of bias |
| 427. | Shu 2014             | Low risk of bias     | Low risk of bias     | Stated but not tested | Stated but not tested | Unclear risk of bias  | Low risk of bias     | Unclear risk of bias |
| 428. | Silverstone 1999     | Unclear risk of bias | Unclear risk of bias | Stated but not tested | Stated but not tested | Unclear risk of bias  | Low risk of bias     | High risk of bias    |
| 429. | Sir 2005             | Unclear risk of bias | Unclear risk of bias | Stated but not tested | Stated but not tested | Unclear risk of bias  | Low risk of bias     | High risk of bias    |
| 430. | Smeraldi 1998        | Unclear risk of bias | Unclear risk of bias | Stated but not tested | Stated but not tested | Unclear risk of bias  | Unclear risk of bias | Unclear risk of bias |
| 431. | Smith 1990           | Unclear risk of bias | Unclear risk of bias | Unclear risk of bias  | Unclear risk of bias  | Unclear risk of bias  | Low risk of bias     | High risk of bias    |
| 432. | Sramek 1995          | Unclear risk of bias | Unclear risk of bias | Stated but not tested | Stated but not tested | Unclear risk of bias  | Low risk of bias     | Low risk of bias     |
| 433. | Stahl 2000           | Unclear risk of bias | Unclear risk of bias | Stated but not tested | Stated but not tested | Stated but not tested | Low risk of bias     | High risk of bias    |
| 434. | Stahl 2010           | Unclear risk of bias | Unclear risk of bias | Stated but not tested | Stated but not tested | Unclear risk of bias  | Low risk of bias     | Unclear risk of bias |
| 435. | Staner 1995          | Unclear risk of bias | Unclear risk of bias | Stated but not tested | Stated but not tested | Unclear risk of bias  | Low risk of bias     | Unclear risk of bias |
| 436. | Stark 1985           | Unclear risk of bias | Unclear risk of bias | Stated but not tested | Stated but not tested | Unclear risk of bias  | Low risk of bias     | Unclear risk of bias |
| 437. | Stratas 1984         | Unclear risk of bias | Unclear risk of bias | Stated but not tested | Stated but not tested | Unclear risk of bias  | High risk of bias    | High risk of bias    |
| 438. | Studie009            | Low risk of bias     | Unclear risk of bias | Stated but not tested | Stated but not tested | Unclear risk of bias  | Low risk of bias     | Unclear risk of bias |
| 439. | Studie032            | Low risk of bias     | Unclear risk of bias | Stated but not tested | Stated but not tested | Unclear risk of bias  | Low risk of bias     | Unclear risk of bias |
| 440. | Study 015            | Low risk of bias     | Low risk of bias     | Stated but not tested | Stated but not tested | Unclear risk of bias  | Low risk of bias     | Unclear risk of bias |
| 441. | Study 032a           | Low risk of bias     | Unclear risk of bias | Stated but not tested | Stated but not tested | Unclear risk of bias  | Low risk of bias     | High risk of bias    |
| 442. | Study 043            | Unclear risk of bias | Unclear risk of bias | Stated but not tested | Stated but not tested | Unclear risk of bias  | Unclear risk of bias | Unclear risk of bias |
| 443. | Study 045            | Low risk of bias     | Low risk of bias     | Stated but not tested | Stated but not tested | Unclear risk of bias  | Low risk of bias     | High risk of bias    |
| 444. | Study 049            | Unclear risk of bias | Low risk of bias     | Stated but not tested | Stated but not tested | Unclear risk of bias  | Low risk of bias     | High risk of bias    |
| 445. | Study 19             | Unclear risk of bias | Unclear risk of bias | Stated but not tested | Stated but not tested | Unclear risk of bias  | Low risk of bias     | Unclear risk of bias |
| 446. | Study 205            | Unclear risk of bias | Unclear risk of bias | Stated but not tested | Stated but not tested | Unclear risk of bias  | Low risk of bias     | High risk of bias    |
| 447. | Study 25             | Unclear risk of bias | Unclear risk of bias | Stated but not tested | Stated but not tested | Unclear risk of bias  | Low risk of bias     | Unclear risk of bias |
| 448. | Study 62a            | Unclear risk of bias | Unclear risk of bias | Stated but not tested | Stated but not tested | Unclear risk of bias  | Low risk of bias     | High risk of bias    |
| 449. | Study 62b            | Unclear risk of bias | Unclear risk of bias | Stated but not tested | Stated but not tested | Unclear risk of bias  | Low risk of bias     | High risk of bias    |
| 450. | Study 89306          | Unclear risk of bias | Unclear risk of bias | Stated but not tested | Stated but not tested | Unclear risk of bias  | Unclear risk of bias | Unclear risk of bias |
| 451. | Study HMAQ - Group B | Unclear risk of bias | Unclear risk of bias | Stated but not tested | Stated but not tested | Unclear risk of bias  | Unclear risk of bias | High risk of bias    |
| 452. | Szegedi 2006         | Low risk of bias     | Unclear risk of bias | Stated but not tested | Stated but not tested | Unclear risk of bias  | Low risk of bias     | Unclear risk of bias |
| 453. | Thase 1997           | Unclear risk of bias | Unclear risk of bias | Stated but not tested | Stated but not tested | Unclear risk of bias  | Low risk of bias     | High risk of bias    |
| 454. | Thase 2006           | Unclear risk of bias | Unclear risk of bias | Stated but not tested | Stated but not tested | Unclear risk of bias  | Low risk of bias     | Unclear risk of bias |
| 455. | Thomson 1982         | Unclear risk of bias | Unclear risk of bias | Stated but not tested | Stated but not tested | Unclear risk of bias  | Unclear risk of bias | High risk of bias    |

|      |                   |                      |                      |                       |                       |                       |                      |                      |
|------|-------------------|----------------------|----------------------|-----------------------|-----------------------|-----------------------|----------------------|----------------------|
| 456. | Tignol 1993       | Unclear risk of bias | Unclear risk of bias | Stated but not tested | Stated but not tested | Stated but not tested | Low risk of bias     | Unclear risk of bias |
| 457. | Timmerman 1993    | Low risk of bias     | Unclear risk of bias | Stated but not tested | Stated but not tested | Unclear risk of bias  | Low risk of bias     | Unclear risk of bias |
| 458. | Tollefson 1995    | Unclear risk of bias | Unclear risk of bias | Stated but not tested | Stated but not tested | Unclear risk of bias  | Low risk of bias     | Unclear risk of bias |
| 459. | Tomarken 2004     | Unclear risk of bias | Unclear risk of bias | Stated but not tested | Stated but not tested | Unclear risk of bias  | Unclear risk of bias | Low risk of bias     |
| 460. | Tourian 2009      | Low risk of bias     | Low risk of bias     | Stated but not tested | Stated but not tested | Unclear risk of bias  | Low risk of bias     | Unclear risk of bias |
| 461. | Trivedi 2004      | Unclear risk of bias | Unclear risk of bias | Stated but not tested | Stated but not tested | Unclear risk of bias  | Low risk of bias     | Unclear risk of bias |
| 462. | Tsutsui 2000      | Unclear risk of bias | Unclear risk of bias | Stated but not tested | Stated but not tested | Stated but not tested | Low risk of bias     | Unclear risk of bias |
| 463. | Tylee 1997        | Unclear risk of bias | Unclear risk of bias | Stated but not tested | Stated but not tested | Unclear risk of bias  | Low risk of bias     | Unclear risk of bias |
| 464. | Tzanakaki 2000    | Unclear risk of bias | Unclear risk of bias | Stated but not tested | Stated but not tested | Unclear risk of bias  | Low risk of bias     | Unclear risk of bias |
| 465. | Upward 1988       | Unclear risk of bias | Unclear risk of bias | Stated but not tested | Stated but not tested | Unclear risk of bias  | Unclear risk of bias | Low risk of bias     |
| 466. | Van de Merwe 1984 | Low risk of bias     | Low risk of bias     | Stated but not tested | Stated but not tested | Unclear risk of bias  | High risk of bias    | Unclear risk of bias |
| 467. | vanMoffaert 1995a | Unclear risk of bias | Unclear risk of bias | Stated but not tested | Stated but not tested | Unclear risk of bias  | Unclear risk of bias | Low risk of bias     |
| 468. | vanMoffaert 1995b | Unclear risk of bias | Unclear risk of bias | Stated but not tested | Stated but not tested | Unclear risk of bias  | Low risk of bias     | Unclear risk of bias |
| 469. | Vartiainen 1994   | Unclear risk of bias | Unclear risk of bias | Stated but not tested | Stated but not tested | Unclear risk of bias  | Low risk of bias     | Unclear risk of bias |
| 470. | VEN 600A-303      | Unclear risk of bias | Unclear risk of bias | Stated but not tested | Stated but not tested | Unclear risk of bias  | Low risk of bias     | High risk of bias    |
| 471. | VEN 600A-313      | Unclear risk of bias | Unclear risk of bias | Stated but not tested | Stated but not tested | Unclear risk of bias  | Low risk of bias     | Unclear risk of bias |
| 472. | VEN XR 367        | Unclear risk of bias | Unclear risk of bias | Stated but not tested | Stated but not tested | Unclear risk of bias  | Low risk of bias     | High risk of bias    |
| 473. | Ventura 2007      | Unclear risk of bias | Unclear risk of bias | Stated but not tested | Stated but not tested | Unclear risk of bias  | Low risk of bias     | Low risk of bias     |
| 474. | Versiani 1999     | Unclear risk of bias | Unclear risk of bias | Stated but not tested | Stated but not tested | Unclear risk of bias  | Low risk of bias     | Low risk of bias     |
| 475. | Versiani 2000     | Unclear risk of bias | Unclear risk of bias | Stated but not tested | Stated but not tested | Unclear risk of bias  | Low risk of bias     | High risk of bias    |
| 476. | Versiani 2005     | Unclear risk of bias | Unclear risk of bias | Stated but not tested | Stated but not tested | Stated but not tested | Low risk of bias     | Low risk of bias     |
| 477. | Wade 2002         | Unclear risk of bias | Unclear risk of bias | Stated but not tested | Stated but not tested | Unclear risk of bias  | Low risk of bias     | Low risk of bias     |
| 478. | Wade 2003         | Unclear risk of bias | Low risk of bias     | Stated but not tested | Stated but not tested | Stated but not tested | Unclear risk of bias | Unclear risk of bias |
| 479. | Wade 2007         | Low risk of bias     | Low risk of bias     | Stated but not tested | Stated but not tested | Unclear risk of bias  | Low risk of bias     | Unclear risk of bias |
| 480. | Walczak 1996      | Unclear risk of bias | Unclear risk of bias | Stated but not tested | Stated but not tested | Unclear risk of bias  | Unclear risk of bias | High risk of bias    |
| 481. | Wang 2014         | Low risk of bias     | Unclear risk of bias | Stated but not tested | Stated but not tested | Unclear risk of bias  | Low risk of bias     | Unclear risk of bias |
| 482. | Wang 2015         | Low risk of bias     | Low risk of bias     | Stated but not tested | Stated but not tested | Stated but not tested | Low risk of bias     | Unclear risk of bias |
| 483. | Weisler 1994      | Unclear risk of bias | Unclear risk of bias | Stated but not tested | Stated but not tested | Unclear risk of bias  | Low risk of bias     | Unclear risk of bias |
| 484. | WELL 029          | Unclear risk of bias | Unclear risk of bias | Stated but not tested | Stated but not tested | Unclear risk of bias  | Unclear risk of bias | Unclear risk of bias |
| 485. | WELL AK140016     | Unclear risk of bias | Unclear risk of bias | Stated but not tested | Stated but not tested | Unclear risk of bias  | Low risk of bias     | Unclear risk of bias |
| 486. | WELL AK1A4006     | Unclear risk of bias | Unclear risk of bias | Stated but not tested | Stated but not tested | Unclear risk of bias  | Low risk of bias     | Unclear risk of bias |

|      |                       |                      |                      |                       |                       |                       |                      |                      |
|------|-----------------------|----------------------|----------------------|-----------------------|-----------------------|-----------------------|----------------------|----------------------|
| 487. | Wellbutrin 06         | Unclear risk of bias | Unclear risk of bias | Stated but not tested | Stated but not tested | Unclear risk of bias  | Low risk of bias     | Low risk of bias     |
| 488. | Wellbutrin 25         | Unclear risk of bias | Unclear risk of bias | Stated but not tested | Stated but not tested | Unclear risk of bias  | Low risk of bias     | High risk of bias    |
| 489. | Wheatley 1998         | Low risk of bias     | Low risk of bias     | Stated but not tested | Stated but not tested | Stated but not tested | Low risk of bias     | Unclear risk of bias |
| 490. | Wilcox 1994           | Unclear risk of bias | Unclear risk of bias | Stated but not tested | Stated but not tested | Unclear risk of bias  | Low risk of bias     | High risk of bias    |
| 491. | Winokur 2003          | Unclear risk of bias | Unclear risk of bias | Stated but not tested | Stated but not tested | Stated but not tested | Low risk of bias     | Low risk of bias     |
| 492. | Yang 2003             | Unclear risk of bias | Unclear risk of bias | Stated but not tested | Stated but not tested | Unclear risk of bias  | Unclear risk of bias | High risk of bias    |
| 493. | Yevtushenko 2007      | Unclear risk of bias | Unclear risk of bias | Stated but not tested | Stated but not tested | Stated but not tested | Unclear risk of bias | Low risk of bias     |
| 494. | Young 1987            | Unclear risk of bias | Unclear risk of bias | Stated but not tested | Stated but not tested | Unclear risk of bias  | Unclear risk of bias | Unclear risk of bias |
| 495. | Zajecka 2010          | Low risk of bias     | Low risk of bias     | Stated but not tested | Stated but not tested | Unclear risk of bias  | Low risk of bias     | Unclear risk of bias |
| 496. | Zhang 2014            | Low risk of bias     | Low risk of bias     | Stated but not tested | Stated but not tested | Unclear risk of bias  | Low risk of bias     | Unclear risk of bias |
| 497. | Zivkov 1995           | Low risk of bias     | Unclear risk of bias | Stated but not tested | Stated but not tested | Unclear risk of bias  | Low risk of bias     | Unclear risk of bias |
| 498. | 845                   | Unclear risk of bias | Unclear risk of bias | Stated but not tested | Stated but not tested | Unclear risk of bias  | Low risk of bias     | Unclear risk of bias |
| 499. | 003-008               | Unclear risk of bias | Unclear risk of bias | Stated but not tested | Stated but not tested | Stated but not tested | Low risk of bias     | High risk of bias    |
| 500. | 003-042               | Unclear risk of bias | Unclear risk of bias | Stated but not tested | Stated but not tested | Stated but not tested | Low risk of bias     | High risk of bias    |
| 501. | 003-048               | Unclear risk of bias | Unclear risk of bias | Stated but not tested | Stated but not tested | Stated but not tested | Low risk of bias     | High risk of bias    |
| 502. | 030A2-0004/030A2-0005 | Unclear risk of bias | Unclear risk of bias | Stated but not tested | Stated but not tested | Unclear risk of bias  | High risk of bias    | Unclear risk of bias |
| 503. | 03A0A-004A            | Unclear risk of bias | Unclear risk of bias | Stated but not tested | Stated but not tested | Unclear risk of bias  | Low risk of bias     | Unclear risk of bias |
| 504. | 0600A1-300            | Unclear risk of bias | Unclear risk of bias | Unclear risk of bias  | Unclear risk of bias  | Unclear risk of bias  | Unclear risk of bias | Unclear risk of bias |
| 505. | 0600A1-372            | Unclear risk of bias | Unclear risk of bias | Stated but not tested | Stated but not tested | Unclear risk of bias  | Low risk of bias     | Unclear risk of bias |
| 506. | 0600A-326             | Low risk of bias     | Unclear risk of bias | Stated but not tested | Unclear risk of bias  | Unclear risk of bias  | Low risk of bias     | High risk of bias    |
| 507. | 0600A-332             | Unclear risk of bias | Unclear risk of bias | Stated but not tested | Stated but not tested | Unclear risk of bias  | Low risk of bias     | Unclear risk of bias |
| 508. | 0600A-347             | Unclear risk of bias | Unclear risk of bias | Stated but not tested | Stated but not tested | Unclear risk of bias  | Unclear risk of bias | High risk of bias    |
| 509. | 0600A-349             | Unclear risk of bias | Unclear risk of bias | Stated but not tested | Stated but not tested | Unclear risk of bias  | Unclear risk of bias | Unclear risk of bias |
| 510. | 0600A-626             | Unclear risk of bias | Unclear risk of bias | Stated but not tested | Stated but not tested | Unclear risk of bias  | Low risk of bias     | High risk of bias    |
| 511. | 0600A-654             | Unclear risk of bias | Unclear risk of bias | Stated but not tested | Stated but not tested | Unclear risk of bias  | Unclear risk of bias | High risk of bias    |
| 512. | 0600B1-367            | Unclear risk of bias | Unclear risk of bias | Stated but not tested | Stated but not tested | Unclear risk of bias  | Low risk of bias     | Unclear risk of bias |
| 513. | 0600B1-384            | Unclear risk of bias | Unclear risk of bias | Stated but not tested | Stated but not tested | Unclear risk of bias  | Low risk of bias     | Unclear risk of bias |
| 514. | 0600B1-402            | Unclear risk of bias | Unclear risk of bias | Stated but not tested | Stated but not tested | Unclear risk of bias  | Low risk of bias     | Unclear risk of bias |
| 515. | 244 (EMD 68 843-009)  | Unclear risk of bias | Unclear risk of bias | Stated but not tested | Stated but not tested | Unclear risk of bias  | Unclear risk of bias | Unclear risk of bias |
| 516. | 245 (EMD 68 843-010)  | Unclear risk of bias | Unclear risk of bias | Stated but not tested | Stated but not tested | Unclear risk of bias  | Unclear risk of bias | Unclear risk of bias |
| 517. | 246 (SB 659746-003)   | Unclear risk of bias | Unclear risk of bias | Stated but not tested | Stated but not tested | Unclear risk of bias  | Unclear risk of bias | Unclear risk of bias |

|             |                            |                      |                      |                       |                       |                      |                  |                      |
|-------------|----------------------------|----------------------|----------------------|-----------------------|-----------------------|----------------------|------------------|----------------------|
| <b>518.</b> | <b>247 (SB 659746-014)</b> | Unclear risk of bias | Unclear risk of bias | Stated but not tested | Stated but not tested | Unclear risk of bias | Low risk of bias | Unclear risk of bias |
| <b>519.</b> | <b>248 (SB 659746-002)</b> | Unclear risk of bias | Unclear risk of bias | Stated but not tested | Stated but not tested | Unclear risk of bias | Low risk of bias | High risk of bias    |
| <b>520.</b> | <b>29060 07 001</b>        | Unclear risk of bias | Unclear risk of bias | Stated but not tested | Stated but not tested | Unclear risk of bias | Low risk of bias | High risk of bias    |
| <b>521.</b> | <b>29060/299</b>           | Unclear risk of bias | Unclear risk of bias | Stated but not tested | Stated but not tested | Unclear risk of bias | Low risk of bias | High risk of bias    |
| <b>522.</b> | <b>29060/356</b>           | Unclear risk of bias | Unclear risk of bias | Stated but not tested | Stated but not tested | Unclear risk of bias | Low risk of bias | Unclear risk of bias |

## 4 Definition of covariates

### 4.1 Sponsorship

We rated each arm of a study as being “sponsored” when it was indicated anywhere in the text that the study was funded/sponsored by the company which manufactured or marketed the drug in question, or if one or more of the authors were affiliated with the company in question, or if the data came from the documents provided by or obtained from the company website. We rated the sponsorship as "Unclear" if the authors only listed the names of the companies in question in their declaration of conflicts of interest.

When one of the arms was “sponsored” thus defined, we regarded that the study was sponsored.

Sponsorship bias was considered at the arm level. Arms in trials sponsored by an academic, governmental or non-for-profit organization were considered to be at low risk of bias. In trials that received funding by industry we considered the arm examining the drug manufactured by the company to be at high risk of bias whereas the comparator arm not associated with the company to be at low risk of bias. Arms in studies with unclear sponsoring were considered at high risk of bias.

### 4.2 Baseline severity

To make the mean baseline severity scores of participants comparable across studies that used different rating scales we used the transformation tables provided online at <http://www.ids-qids.org/index2.html> - table 1 (tables 3, 4). We converted all values into HAMD17 scale. We excluded studies that used HAMD29, HAMD31 or other scales that we could not transform into HAMD17 using this online tool. We included studies that reported the use of a HAMD scale without specifying which HAMD scale was used by assuming that such studies used the HAMD17 scale.

### 4.3 Novelty of the agent

In each study we rate the drug of interest as “novel” in comparison with placebo or with an older standard drug. The “oldness” of the drug was judged according to the region where the study was conducted because when and whether a drug was marketed would be different from region to region in the world. When such information was unclear, we rated novelty of the agent as “Unclear.”

### 4.4 Licensed and accepted dose ranges

|               | Licensed dose range: dosage approved by FDA and EMA (if the drug was not licensed in USA or Europe, we used BNF) (mg/day) | Accepted dose range: Range accepted/ recommended in main clinical guidelines, including starting dose by FDA (mg/day) |                                               |                                                |
|---------------|---------------------------------------------------------------------------------------------------------------------------|-----------------------------------------------------------------------------------------------------------------------|-----------------------------------------------|------------------------------------------------|
|               |                                                                                                                           | <i>Accepted range</i>                                                                                                 | <i>Accepted but lower than licensed range</i> | <i>Accepted but higher than licensed range</i> |
| Agomelatine   | 25-50                                                                                                                     | 25-50                                                                                                                 | -                                             | -                                              |
| Amitriptyline | 75-200                                                                                                                    | 50a-300                                                                                                               | 50-74                                         | 201-300                                        |

|                 |         |          |         |         |
|-----------------|---------|----------|---------|---------|
| Bupropion       | 300-450 | 200a-450 | 200-299 | -       |
| Citalopram      | 20-40   | 20-60    | -       | 41-60   |
| Clomipramine    | 30-250  | 10-300   | 10-29   | 251-300 |
| Desvenlafaxine  | 50-100  | 50-100   | -       | -       |
| Duloxetine      | 40-120  | 30-120   | 30-39   | -       |
| Escitalopram    | 10-20   | 10-30    | -       | 21-30   |
| Fluoxetine      | 20-80   | 10-80    | 10-19   | -       |
| Fluvoxamine     | 50-300  | 50-300   | -       | -       |
| Levomilnacipran | 40-120  | 20a-120  | 20-39   | -       |
| Milnacipran     | 50-200  | 50-200   | -       | -       |
| Mirtazapine     | 15-45   | 15-45    | -       | -       |
| Nefazodone      | 300-600 | 150-600  | 150-299 | -       |
| Paroxetine      | 20-50   | 20-60    | -       | 51-60   |
| Reboxetine      | 8-12    | 4-12     | 4-7     | -       |
| Sertraline      | 50-200  | 50-200   | -       | -       |
| Trazodone       | 150-400 | 150-600  | -       | 401-600 |
| Venlafaxine     | 75-375  | 75-375   | -       | -       |
| Vilazodone      | 20-40   | 10a-40   | 10-19   | -       |
| Vortioxetine    | 5-20    | 5-20     | -       | -       |

a: Starting dose in FDA, which should usually be increased

#### 4.5 Unpublished data

For all studies we sought information about the response to treatment from published and unpublished data. The flowchart below presents the followed hierarchy when extracting response rates from published and unpublished reports of trials.

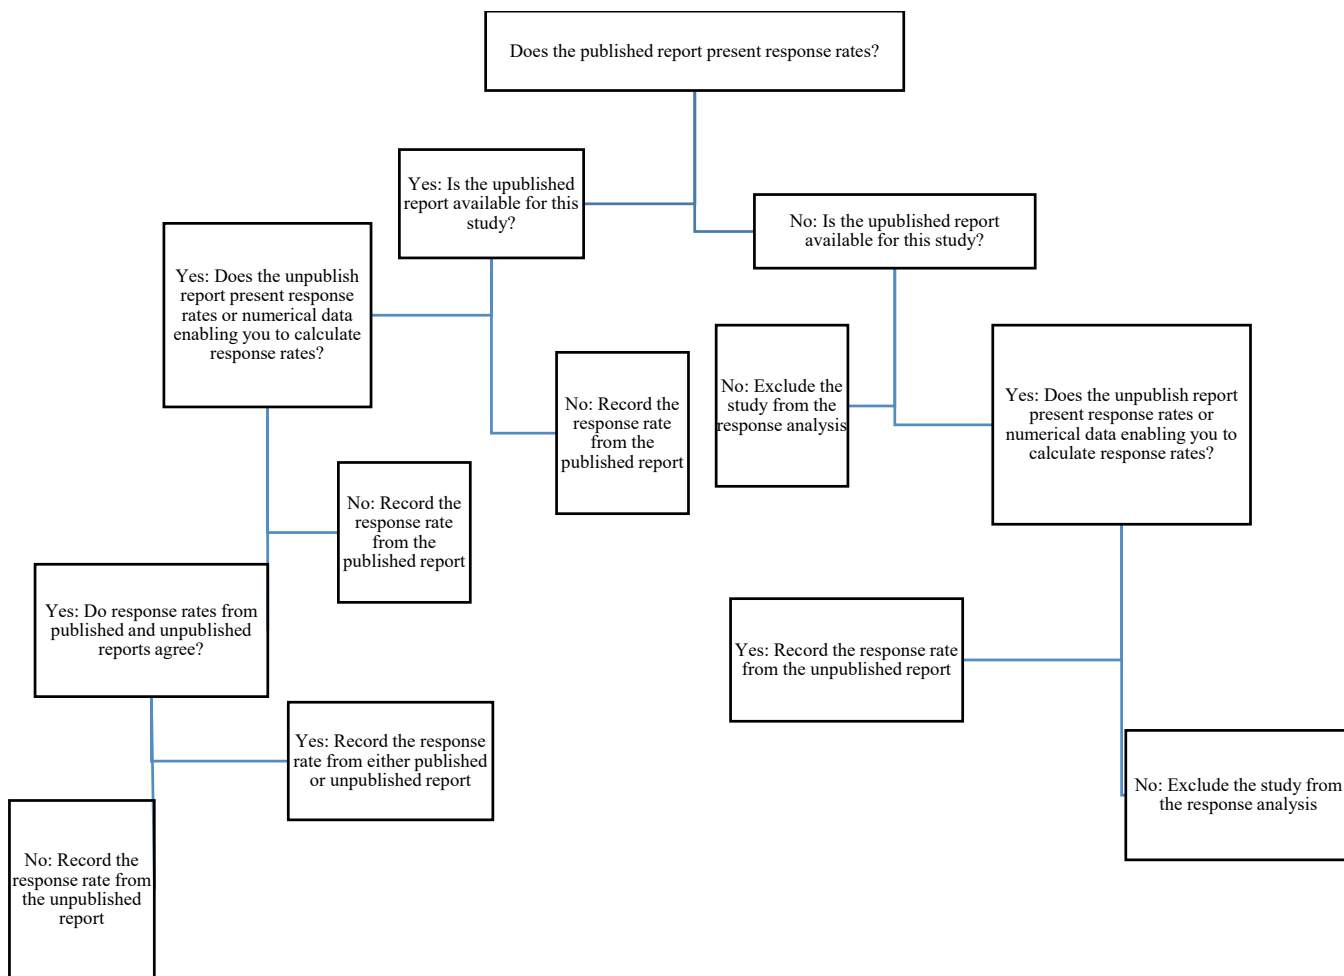

Studies can be classified into the following 6 categories. These categories are grouped into forming the variables “Response rate presented in published report” and “Unpublished report available and presents adequate response data” as shown in the following table.

| <b>Trial category</b>                                                                                                    | Number of trials (arms) | Variable “Response rate presented in published report” | Variable “Unpublished report available and presents adequate response data” |
|--------------------------------------------------------------------------------------------------------------------------|-------------------------|--------------------------------------------------------|-----------------------------------------------------------------------------|
| No response rates were reported in in the published or the unpublished study reports                                     | 35 (56)                 | <i>Excluded from the analysis of response</i>          | NO                                                                          |
| No response data presented in the published report. Response rate is presented in the unpublished report (and recorded). | 73 (123)                | NO                                                     | YES                                                                         |



|                                                                                                                                                                                                                                                   |           |     |     |
|---------------------------------------------------------------------------------------------------------------------------------------------------------------------------------------------------------------------------------------------------|-----------|-----|-----|
| The published report presents some information about response but the numerical data reported is not sufficient to estimate response rates. Response rate is recorded from unpublished reports.                                                   | 22 (43)   | YES |     |
| Response rates are presented both in published and unpublished reports but figures do not match. We recorded response rates from the unpublished reports.                                                                                         | 26 (36)   |     |     |
| Response rates imputed from other relevant information presented in the published reports (e.g. from continuous outcomes). There is no unpublished study report or the unpublished report presents insufficient data to calculate response rates. | 51 (78)   |     | NO  |
| Response rates are presented in published report. There is no unpublished study report or the unpublished report presents insufficient data to calculate response rates.                                                                          | 164 (277) |     |     |
| Response rates are presented both in published and unpublished reports and figures do match.                                                                                                                                                      | 50 (93)   |     | YES |

#### 4.6 Risk of bias in the included studies

Two independent reviewers assessed RoB of each study for the primary outcome of efficacy in the following domains: sequence generation, allocation concealment, blinding of participant, blinding of therapist, blinding of assessor, selective reporting and attrition.

Then we summatively rated the overall RoB of each study as follows : Studies were classified as having low risk of bias if none of the domains above was rated as high risk of bias and three or less were rated as unclear risk; moderate if one was rated as high risk of bias or none was rated as high risk of bias but four or more were rated as unclear risk, and all other cases were assumed to pertain to high risk of bias.

## 5 *Heterogeneity parameter standard deviations estimated in various models*

We present heterogeneity  $\tau$  with 95% credible intervals (CrI).

### 5.1 *Primary outcomes*

#### 5.1.1 Response

Network  $\tau$  (from NMA in all trials, n=433)= 0.21 (0.17,0.25)

Network  $\tau$  (from NMA in head-to-head trials, n=180)= 0.16 (0.04,0.25)

Placebo-controlled trials common  $\tau$  (from pairwise meta-analyses sharing the same  $\tau$ )= 0.22 (0.17,0.27)

Head-to-head trials common  $\tau$  (from pairwise meta-analyses sharing the same  $\tau$ )= 0.17 (0.08,0.25)

#### 5.1.2 Dropouts for any reason

Network  $\tau$  (from NMA in all trials, n=423)= 0.20 (0.15,0.25)

Network  $\tau$  (from NMA in in head-to-head trials, n=174)= 0.11 (0.00,0.23)

Placebo-controlled trials common  $\tau$  (from pairwise meta-analyses sharing the same  $\tau$ )= 0.22 (0.17,0.28)

Head-to-head trials common  $\tau$  (from pairwise meta-analyses sharing the same  $\tau$ )= 0.09 (0.01,0.20)

### 5.2 *Secondary outcomes*

#### 5.2.1 Efficacy continuous

Network  $\tau$  (from NMA in all trials, n=391)= 0.12 (0.10,0.14)

Network  $\tau$  (from NMA in head-to-head trials, n=155)= 0.08 (0.03,0.13)

Placebo-controlled trials common  $\tau$  (from pairwise meta-analyses sharing the same  $\tau$ )= 0.14 (0.11,0.16)

Head-to-head trials common  $\tau$  (from pairwise meta-analyses sharing the same  $\tau$ )= 0.08 (0.04,0.12)

#### 5.2.2 Remission

Network  $\tau$  (from NMA in all trials, n=417)= 0.19 (0.15,0.24)

Network  $\tau$  (from NMA in head-to-head trials, n=172)=0.18 (0.06,0.28)

Placebo-controlled trials common  $\tau$  (from pairwise meta-analyses sharing the same  $\tau$ )= 0.19 (0.13,0.25)

Head-to-head trials common  $\tau$  (from pairwise meta-analyses sharing the same  $\tau$ )= 0.20 (0.12,0.28)

#### 5.2.3 Dropouts due to adverse events

Network  $\tau$  (from NMA in all trials, n=395)= 0.32 (0.23,0.40)

Network  $\tau$  (from NMA in in head-to-head trials, n=154)= 0.31 (0.10,0.48)

Placebo-controlled trials common  $\tau$  (from pairwise meta-analyses sharing the same  $\tau$ )= 0.28 (0.14,0.39)

Head-to-head trials common  $\tau$  (from pairwise meta-analyses sharing the same  $\tau$ )= 0.19 (0.03,0.35)

## 6 Estimation of inconsistency: summary of results

| Outcome and Data                                  | Number of studies | Number of inconsistent loops out of total (loop-specific method) | Percentage of the inconsistent loops | Number of inconsistent comparisons out of total (SIDE splitting) | Percentage of the inconsistent comparisons | p-value of the Design-by-Treatment test |
|---------------------------------------------------|-------------------|------------------------------------------------------------------|--------------------------------------|------------------------------------------------------------------|--------------------------------------------|-----------------------------------------|
| <b>Response all trials</b>                        | 432               | 17/219                                                           | 8%                                   | 8/93                                                             | 9%                                         | 0.0631                                  |
| <b>Response head-to-head</b>                      | 179               | 11/140                                                           | 8%                                   | 5/69                                                             | 7%                                         | 0.3182                                  |
| <b>Dropout for any reason all trials</b>          | 422               | 16/210                                                           | 8%                                   | 4/91                                                             | 4%                                         | 0.2190                                  |
| <b>Dropout for any reason head-to-head trials</b> | 173               | 11/122                                                           | 9%                                   | 4/66                                                             | 6%                                         | 0.0544                                  |
| <b>Efficacy continuous all trials</b>             | 390               | 13/200                                                           | 7%                                   | 5/90                                                             | 6%                                         | 0.7872                                  |
| <b>Efficacy continuous head-to-head trials</b>    | 154               | 6/115                                                            | 5%                                   | 3/64                                                             | 5%                                         | 0.8145                                  |
| <b>Remission all trials</b>                       | 416               | 13/206                                                           | 6%                                   | 9/91                                                             | 10%                                        | 0.4655                                  |
| <b>Remission head-to-head trials</b>              | 171               | 9/119                                                            | 8%                                   | 6/65                                                             | 9%                                         | 0.0652                                  |
| <b>Dropout due to AE all trials</b>               | 394               | 16/204                                                           | 8%                                   | 7/90                                                             | 8%                                         | 0.0008                                  |
| <b>Dropout due to AE head-to-head</b>             | 155               | 10/113                                                           | 9%                                   | 9/63                                                             | 14%                                        | 0.0034                                  |

## ***7 Analyses of the all trials network (including placebo arms)***

### *7.1 Results from pairwise meta-analyses*

In the following pairwise meta-analyses, we assumed two heterogeneity variance parameters: one for placebo-controlled trials and one for head-to-head trials.

Drugs are reported in alphabetical order. Results are the ORs (with 95% CrI) in the column-defining treatment compared with the row-defining treatment. For efficacy, ORs higher than 1 favour the column-defining treatment (ie, the first in alphabetical order). For acceptability, ORs lower than 1 favour the first drug in alphabetical order. To obtain ORs for comparisons in the opposite direction, reciprocals should be taken.

## 7.1.1 Response

|                         |                         |                         |                         |                         |                         |                         |                         |                         |                         |                         |   |                           |                         |                         |                         |                         |                         |                         |                         |                         |                         |                         |                         |
|-------------------------|-------------------------|-------------------------|-------------------------|-------------------------|-------------------------|-------------------------|-------------------------|-------------------------|-------------------------|-------------------------|---|---------------------------|-------------------------|-------------------------|-------------------------|-------------------------|-------------------------|-------------------------|-------------------------|-------------------------|-------------------------|-------------------------|-------------------------|
| Agom                    | -                       | -                       | -                       | -                       | -                       | 1.32<br>(0.77,<br>2.25) | 0.81<br>(0.49,<br>1.33) | 0.98<br>(0.76,<br>1.28) | -                       | -                       | - | -                         | -                       | 1.17<br>(0.91,<br>1.51) | -                       | -                       | -                       | 0.73<br>(0.47,<br>1.15) | -                       | -                       | 0.64<br>(0.53,<br>0.76) |                         |                         |
| -                       | Amit                    | -                       | -                       | -                       | -                       | -                       | -                       | 0.93<br>(0.68,<br>1.28) | 0.92<br>(0.56,<br>1.50) | -                       | - | 0.85<br>(0.46,<br>1.55)   | 0.95<br>(0.61,<br>1.49) | -                       | 0.93<br>(0.74,<br>1.18) | -                       | 0.77<br>(0.60,<br>0.99) | 0.78<br>(0.49,<br>1.27) | 0.84<br>(0.48,<br>1.49) | -                       | -                       | 0.37<br>(0.31,<br>0.45) |                         |
| -                       | -                       | Bupr                    | -                       | -                       | -                       | -                       | 1.07<br>(0.70,<br>1.62) | 1.20<br>(0.83,<br>1.71) | -                       | -                       | - | -                         | -                       | -                       | 1.00<br>(0.47,<br>2.12) | -                       | 1.13<br>(0.12,<br>9.74) | 0.47<br>(0.21,<br>1.05) | 0.85<br>(0.49,<br>1.47) | -                       | -                       | 0.67<br>(0.56,<br>0.81) |                         |
| -                       | -                       | -                       | Cita                    | 1.78<br>(0.79,<br>4.08) | -                       | -                       | 1.35<br>(1.09,<br>1.67) | 1.04<br>(0.69,<br>1.56) | 0.91<br>(0.46,<br>1.78) | -                       | - | -                         | 0.74<br>(0.34,<br>1.63) | -                       | 0.74<br>(0.41,<br>1.33) | 0.58<br>(0.34,<br>0.99) | 1.18<br>(0.74,<br>1.89) | -                       | 0.55<br>(0.29,<br>1.06) | 1.11<br>(0.76,<br>1.62) | -                       | -                       | 0.66<br>(0.54,<br>0.81) |
| -                       | -                       | -                       | -                       | 0.56<br>(0.25,<br>1.26) | Clom                    | -                       | -                       | 1.65<br>(1.01,<br>2.70) | 0.53<br>(0.18,<br>1.49) | -                       | - | 1.17<br>(0.50,<br>2.75)   | -                       | -                       | 1.10<br>(0.82,<br>1.48) | -                       | 1.05<br>(0.61,<br>1.82) | 0.62<br>(0.26,<br>1.43) | 1.68<br>(0.90,<br>3.12) | -                       | -                       | -                       |                         |
| -                       | -                       | -                       | -                       | -                       | Desv                    | 1.21<br>(0.72,<br>2.02) | -                       | -                       | -                       | -                       | - | -                         | -                       | -                       | -                       | -                       | -                       | -                       | -                       | -                       | -                       | -                       | 0.68<br>(0.56,<br>0.82) |
| 0.76<br>(0.44,<br>1.30) | -                       | -                       | -                       | -                       | 0.83<br>(0.49,<br>1.39) | Dulo                    | 1.18<br>(0.86,<br>1.62) | 0.81<br>(0.43,<br>1.51) | -                       | -                       | - | -                         | -                       | -                       | 1.02<br>(0.82,<br>1.28) | -                       | -                       | -                       | -                       | 1.11<br>(0.77,<br>1.61) | -                       | 0.72<br>(0.58,<br>0.90) | 0.52<br>(0.45,<br>0.60) |
| 1.24<br>(0.75,<br>2.03) | -                       | 0.94<br>(0.62,<br>1.42) | 0.74<br>(0.60,<br>0.92) | -                       | -                       | 0.85<br>(0.62,<br>1.16) | Esci                    | 0.88<br>(0.61,<br>1.27) | -                       | -                       | - | -                         | -                       | -                       | 1.00<br>(0.73,<br>1.38) | -                       | 1.17<br>(0.77,<br>1.80) | -                       | 0.83<br>(0.52,<br>1.31) | -                       | -                       | 0.69<br>(0.60,<br>0.80) |                         |
| 1.02<br>(0.78,<br>1.32) | 1.07<br>(0.78,<br>1.46) | 0.84<br>(0.59,<br>1.20) | 0.97<br>(0.64,<br>1.45) | 0.60<br>(0.37,<br>0.99) | -                       | 1.24<br>(0.66,<br>2.31) | 1.13<br>(0.79,<br>1.63) | Fluo                    | 1.03<br>(0.61,<br>1.76) | -                       | - | 0.85<br>(0.54,<br>1.32)   | 1.34<br>(0.99,<br>1.84) | 1.04<br>(0.53,<br>2.01) | 1.05<br>(0.86,<br>1.28) | 0.81<br>(0.58,<br>1.15) | 1.43<br>(1.08,<br>1.89) | 1.22<br>(0.69,<br>2.11) | 1.24<br>(1.04,<br>1.50) | -                       | -                       | 0.70<br>(0.62,<br>0.79) |                         |
| -                       | 1.09<br>(0.67,<br>1.79) | -                       | 1.10<br>(0.56,<br>2.18) | 1.90<br>(0.67,<br>5.69) | -                       | -                       | -                       | 0.97<br>(0.54,<br>1.65) | Fluv                    | -                       | - | 1.72<br>(0.96,<br>3.15)   | 1.14<br>(0.71,<br>1.82) | -                       | 1.14<br>(0.60,<br>2.17) | -                       | 0.63<br>(0.33,<br>1.20) | -                       | 2.40<br>(0.98,<br>5.97) | -                       | -                       | 0.48<br>(0.36,<br>0.65) |                         |
| -                       | -                       | -                       | -                       | -                       | -                       | -                       | -                       | -                       | -                       | Levo                    | - | -                         | -                       | -                       | -                       | -                       | -                       | -                       | -                       | -                       | -                       | -                       | 0.63<br>(0.49,<br>0.81) |
| -                       | 1.18<br>(0.65,<br>2.15) | -                       | -                       | 0.86<br>(0.36,<br>2.02) | -                       | -                       | -                       | 1.18<br>(0.76,<br>1.84) | 0.58<br>(0.32,<br>1.04) | -                       | - | -                         | -                       | -                       | 1.05<br>(0.74,<br>1.49) | -                       | 0.46<br>(0.05,<br>2.80) | -                       | -                       | -                       | -                       | -                       | -                       |
| -                       | 1.05<br>(0.67,<br>1.64) | -                       | 1.34<br>(0.61,<br>2.97) | -                       | -                       | -                       | -                       | 0.75<br>(0.54,<br>1.01) | 0.88<br>(0.55,<br>1.41) | -                       | - | -                         | -                       | Mirt                    | -                       | 1.03<br>(0.76,<br>1.41) | -                       | 1.03<br>(0.58,<br>1.81) | 0.66<br>(0.39,<br>1.12) | 0.73<br>(0.48,<br>1.12) | -                       | -                       | 0.55<br>(0.43,<br>0.71) |
| -                       | -                       | -                       | -                       | -                       | -                       | -                       | -                       | 0.96<br>(0.50,<br>1.88) | -                       | -                       | - | -                         | -                       | Nefa                    | 1.33<br>(0.75,<br>2.43) | -                       | 0.86<br>(0.42,<br>1.74) | -                       | -                       | -                       | -                       | -                       | 0.57<br>(0.42,<br>0.77) |
| 0.85<br>(0.66,<br>1.10) | 1.07<br>(0.84,<br>1.35) | 1.00<br>(0.47,<br>2.12) | 1.35<br>(0.75,<br>2.45) | 0.91<br>(0.68,<br>1.22) | -                       | 0.98<br>(0.78,<br>1.22) | 1.00<br>(0.73,<br>1.36) | 0.96<br>(0.78,<br>1.16) | 0.88<br>(0.46,<br>1.68) | -                       | - | 0.95<br>(0.67,<br>1.35)   | 0.97<br>(0.71,<br>1.32) | 0.75<br>(0.41,<br>1.34) | Paro                    | 0.81<br>(0.60,<br>1.08) | 1.11<br>(0.72,<br>1.72) | 0.58<br>(0.32,<br>1.02) | 1.58<br>(1.09,<br>2.31) | -                       | -                       | 0.60<br>(0.53,<br>0.67) |                         |
| -                       | -                       | -                       | 1.74<br>(1.01,<br>2.98) | -                       | -                       | -                       | -                       | 1.23<br>(0.87,<br>1.72) | -                       | -                       | - | -                         | -                       | -                       | 1.24<br>(0.92,<br>1.66) | Rebo                    | -                       | -                       | 0.95<br>(0.47,<br>1.92) | -                       | -                       | 0.70<br>(0.56,<br>0.87) |                         |
| -                       | 1.29<br>(1.01,<br>1.66) | 0.88<br>(0.10,<br>8.13) | 0.84<br>(0.53,<br>1.35) | 0.95<br>(0.55,<br>1.65) | -                       | -                       | 0.85<br>(0.56,<br>1.31) | 0.70<br>(0.53,<br>0.92) | 1.58<br>(0.84,<br>3.01) | -                       | - | 2.18<br>(0.36,<br>19.73 ) | 0.98<br>(0.55,<br>1.73) | 1.16<br>(0.58,<br>2.37) | 0.90<br>(0.58,<br>1.38) | -                       | Sert                    | 1.82<br>(0.79,<br>4.27) | 1.18<br>(0.77,<br>1.81) | -                       | -                       | 0.62<br>(0.53,<br>0.74) |                         |
| -                       | 1.28<br>(0.79,<br>2.06) | 2.11<br>(0.95,<br>4.73) | -                       | 1.62<br>(0.70,<br>3.79) | -                       | -                       | -                       | 0.82<br>(0.47,<br>1.44) | -                       | -                       | - | 1.51<br>(0.89,<br>2.57)   | -                       | 1.73<br>(0.98,<br>3.08) | -                       | 0.55<br>(0.23,<br>1.27) | Traz                    | 1.58<br>(0.91,<br>2.79) | -                       | -                       | -                       | 0.56<br>(0.41,<br>0.76) |                         |
| 1.36<br>(0.87,<br>2.15) | 1.19<br>(0.67,<br>2.09) | 1.17<br>(0.68,<br>2.02) | 1.81<br>(0.94,<br>3.48) | 0.60<br>(0.32,<br>1.11) | -                       | 0.90<br>(0.62,<br>1.30) | 1.21<br>(0.77,<br>1.92) | 0.81<br>(0.67,<br>0.97) | 0.42<br>(0.17,<br>1.02) | -                       | - | 1.37<br>(0.89,<br>2.09)   | -                       | 0.63<br>(0.43,<br>0.92) | 1.05<br>(0.52,<br>2.12) | 0.84<br>(0.55,<br>1.30) | 0.63<br>(0.36,<br>1.10) | Venl                    | -                       | 1.19<br>(0.80,<br>1.76) | -                       | 0.56<br>(0.48,<br>0.65) |                         |
| -                       | -                       | -                       | 0.90<br>(0.62,<br>1.31) | -                       | -                       | -                       | -                       | -                       | -                       | -                       | - | -                         | -                       | -                       | -                       | -                       | -                       | -                       | -                       | Vila                    | -                       | -                       | 0.64<br>(0.50,<br>0.81) |
| -                       | -                       | -                       | -                       | -                       | -                       | 1.38<br>(1.11,<br>1.72) | -                       | -                       | -                       | -                       | - | -                         | -                       | -                       | -                       | -                       | -                       | -                       | 0.84<br>(0.57,<br>1.25) | -                       | Vort                    | -                       | 0.57<br>(0.49,<br>0.67) |
| 1.57<br>(1.31,<br>1.87) | 2.69<br>(2.22,<br>3.26) | 1.49<br>(1.23,<br>1.80) | 1.51<br>(1.24,<br>1.84) | -                       | 1.48<br>(1.21,<br>1.80) | 1.93<br>(1.68,<br>2.23) | 1.44<br>(1.25,<br>1.67) | 1.43<br>(1.26,<br>1.61) | 2.07<br>(1.53,<br>2.78) | 1.59<br>(1.23,<br>2.06) | - | 1.82<br>(1.41,<br>2.35)   | 1.75<br>(1.29,<br>2.37) | 1.67<br>(1.49,<br>1.87) | 1.43<br>(1.15,<br>1.79) | 1.60<br>(1.35,<br>1.90) | 1.79<br>(1.32,<br>2.41) | 1.79<br>(1.54,<br>2.08) | 1.57<br>(1.23,<br>2.00) | 1.75<br>(1.49,<br>2.05) | Plac                    | -                       |                         |

## 7.1.2 Dropouts for any reason

|                         |                         |                         |                         |                         |                         |                         |                         |                         |                              |                         |   |                         |                         |                         |                         |                         |                         |                         |                               |                         |                         |                              |                         |
|-------------------------|-------------------------|-------------------------|-------------------------|-------------------------|-------------------------|-------------------------|-------------------------|-------------------------|------------------------------|-------------------------|---|-------------------------|-------------------------|-------------------------|-------------------------|-------------------------|-------------------------|-------------------------|-------------------------------|-------------------------|-------------------------|------------------------------|-------------------------|
| Ago m                   | -                       | -                       | -                       | -                       | -                       | 0.86<br>(0.49,<br>1.50) | 1.29<br>(0.71,<br>2.35) | 1.04<br>(0.80,<br>1.35) | -                            | -                       | - | -                       | -                       | 1.01<br>(0.77,<br>1.31) | -                       | -                       | -                       | 2.06<br>(1.30,<br>3.42) | -                             | -                       | 1.16<br>(0.94,<br>1.43) |                              |                         |
| -                       | Amit                    | 1.88<br>(0.71,<br>6.25) | -                       | -                       | -                       | -                       | -                       | 0.63<br>(0.45,<br>0.87) | 0.74<br>(0.47,<br>1.19)      | -                       | - | 0.99<br>(0.48,<br>1.98) | 1.17<br>(0.76,<br>1.84) | -                       | 1.00<br>(0.78,<br>1.26) | -                       | 0.93<br>(0.73,<br>1.20) | 1.01<br>(0.58,<br>1.74) | 1.00<br>(0.54,<br>1.88)       | -                       | -                       | 1.33<br>(1.08,<br>1.63)      |                         |
| -                       | 0.53<br>(0.16,<br>1.40) | Bupr                    | -                       | -                       | -                       | -                       | -                       | 1.07<br>(0.71,<br>1.62) | 0.99<br>(0.72,<br>1.38)      | -                       | - | -                       | -                       | -                       | 1.37<br>(0.60,<br>3.05) | -                       | -                       | 0.92<br>(0.44,<br>1.92) | 1.15<br>(0.72,<br>1.87)       | -                       | -                       | 0.99<br>(0.81,<br>1.23)      |                         |
| -                       | -                       | -                       | Cita                    | 0.62<br>(0.21,<br>1.61) | -                       | -                       | -                       | 0.88<br>(0.67,<br>1.16) | 0.87<br>(0.58,<br>1.30)      | 1.45<br>(0.74,<br>2.89) | - | -                       | 2.44<br>(1.01,<br>6.12) | -                       | 1.10<br>(0.59,<br>2.01) | 1.60<br>(0.92,<br>2.83) | 1.61<br>(0.97,<br>2.68) | -                       | 10.11<br>(2.19,<br>88.50<br>) | 1.21<br>(0.80,<br>1.82) | -                       | 0.95<br>(0.75,<br>1.21)      |                         |
| -                       | -                       | -                       | 1.61<br>(0.62,<br>4.77) | Clom                    | -                       | -                       | -                       | 0.65<br>(0.36,<br>1.17) | 2.04<br>(0.40,<br>11.26<br>) | -                       | - | -                       | -                       | -                       | 0.65<br>(0.49,<br>0.85) | -                       | 0.54<br>(0.28,<br>1.07) | -                       | 0.96<br>(0.41,<br>2.35)       | -                       | -                       | 2.31<br>(0.42,<br>14.70<br>) |                         |
| -                       | -                       | -                       | -                       | -                       | Desv                    | 0.87<br>(0.53,<br>1.36) | -                       | -                       | -                            | -                       | - | -                       | -                       | -                       | -                       | -                       | -                       | -                       | -                             | -                       | -                       | -                            | 0.94<br>(0.75,<br>1.17) |
| 1.16<br>(0.67,<br>2.05) | -                       | -                       | -                       | -                       | 1.15<br>(0.74,<br>1.87) | Dulo                    | 0.62<br>(0.46,<br>0.84) | 1.23<br>(0.66,<br>2.25) | -                            | -                       | - | -                       | -                       | -                       | 0.99<br>(0.79,<br>1.24) | -                       | -                       | -                       | 0.64<br>(0.44,<br>0.94)       | -                       | 0.96<br>(0.76,<br>1.20) | 0.93<br>(0.80,<br>1.10)      |                         |
| 0.78<br>(0.43,<br>1.40) | -                       | 0.93<br>(0.62,<br>1.40) | 1.13<br>(0.86,<br>1.49) | -                       | -                       | 1.60<br>(1.19,<br>2.17) | Esci                    | 1.13<br>(0.78,<br>1.61) | -                            | -                       | - | -                       | -                       | -                       | 1.16<br>(0.79,<br>1.71) | -                       | 0.92<br>(0.61,<br>1.45) | -                       | 1.12<br>(0.71,<br>1.76)       | -                       | -                       | 1.01<br>(0.85,<br>1.19)      |                         |
| 0.97<br>(0.74,<br>1.26) | 1.99<br>(1.15,<br>2.23) | 1.01<br>(0.73,<br>1.38) | 1.15<br>(0.77,<br>1.74) | 1.55<br>(0.85,<br>2.74) | -                       | 0.81<br>(0.44,<br>1.50) | 0.89<br>(0.62,<br>1.28) | Fluo                    | 1.18<br>(0.63,<br>2.12)      | -                       | - | 1.08<br>(0.71,<br>1.65) | 1.39<br>(1.01,<br>1.91) | 2.00<br>(0.81,<br>5.03) | 1.05<br>(0.87,<br>1.26) | 1.39<br>(0.99,<br>1.92) | 0.86<br>(0.61,<br>1.16) | 1.55<br>(0.88,<br>2.74) | 1.14<br>(0.94,<br>1.38)       | -                       | -                       | 1.16<br>(1.01,<br>1.33)      |                         |
| -                       | 1.36<br>(0.84,<br>2.12) | -                       | 0.69<br>(0.35,<br>1.34) | 0.49<br>(0.09,<br>2.49) | -                       | -                       | -                       | 0.85<br>(0.47,<br>1.59) | Fluv                         | -                       | - | 0.77<br>(0.36,<br>1.63) | 1.17<br>(0.71,<br>1.94) | -                       | 0.74<br>(0.39,<br>1.40) | -                       | 0.44<br>(0.17,<br>1.05) | -                       | 0.48<br>(0.20,<br>1.19)       | -                       | -                       | 0.92<br>(0.68,<br>1.24)      |                         |
| -                       | -                       | -                       | -                       | -                       | -                       | -                       | -                       | -                       | -                            | Levo                    | - | -                       | -                       | -                       | -                       | -                       | -                       | -                       | -                             | -                       | -                       | -                            | 0.84<br>(0.65,<br>1.09) |
| -                       | 1.01<br>(0.50,<br>2.10) | -                       | -                       | -                       | -                       | -                       | -                       | 0.93<br>(0.61,<br>1.41) | 1.30<br>(0.61,<br>2.81)      | -                       | - | Miln                    | -                       | -                       | 1.01<br>(0.72,<br>1.40) | -                       | 0.60<br>(0.19,<br>1.71) | -                       | -                             | -                       | -                       | -                            |                         |
| -                       | 0.85<br>(0.54,<br>1.31) | -                       | 0.41<br>(0.16,<br>0.99) | -                       | -                       | -                       | -                       | 0.72<br>(0.52,<br>0.99) | 0.86<br>(0.51,<br>1.40)      | -                       | - | -                       | Mirt                    | -                       | 1.20<br>(0.86,<br>1.68) | -                       | 0.77<br>(0.43,<br>1.34) | 1.10<br>(0.64,<br>1.95) | 1.37<br>(0.93,<br>2.05)       | -                       | -                       | 1.10<br>(0.85,<br>1.41)      |                         |
| -                       | -                       | -                       | -                       | -                       | -                       | -                       | -                       | 0.50<br>(0.20,<br>1.23) | -                            | -                       | - | -                       | -                       | Nefa                    | 0.95<br>(0.52,<br>1.74) | -                       | 0.98<br>(0.48,<br>2.10) | -                       | -                             | -                       | -                       | 1.19<br>(0.87,<br>1.61)      |                         |
| 0.99<br>(0.76,<br>1.29) | 1.00<br>(0.80,<br>1.29) | 0.73<br>(0.33,<br>1.67) | 0.91<br>(0.50,<br>1.71) | 1.54<br>(1.17,<br>2.04) | -                       | 1.01<br>(0.81,<br>1.27) | 0.86<br>(0.59,<br>1.26) | 0.95<br>(0.79,<br>1.15) | 1.35<br>(0.71,<br>2.59)      | -                       | - | 0.99<br>(0.71,<br>1.38) | 0.84<br>(0.59,<br>1.17) | 1.05<br>(0.58,<br>1.92) | Paro                    | 1.24<br>(0.95,<br>1.63) | 1.15<br>(0.72,<br>1.80) | 1.43<br>(0.82,<br>2.48) | 0.82<br>(0.57,<br>1.17)       | -                       | -                       | 1.03<br>(0.91,<br>1.16)      |                         |
| -                       | -                       | -                       | 0.62<br>(0.35,<br>1.09) | -                       | -                       | -                       | -                       | 0.72<br>(0.52,<br>1.01) | -                            | -                       | - | -                       | -                       | -                       | 0.81<br>(0.61,<br>1.06) | Rebo                    | -                       | -                       | -                             | -                       | -                       | 0.94<br>(0.74,<br>1.20)      |                         |
| -                       | 1.08<br>(0.83,<br>1.38) | -                       | 0.62<br>(0.37,<br>1.03) | 1.85<br>(0.94,<br>3.59) | -                       | -                       | 1.08<br>(0.69,<br>1.64) | 1.16<br>(0.86,<br>1.64) | 2.27<br>(0.95,<br>6.05)      | -                       | - | 1.68<br>(0.58,<br>5.25) | 1.31<br>(0.75,<br>2.31) | 1.02<br>(0.48,<br>2.10) | 0.87<br>(0.56,<br>1.38) | -                       | Sert                    | 0.57<br>(0.17,<br>1.85) | 1.21<br>(0.76,<br>1.93)       | -                       | -                       | 0.94<br>(0.78,<br>1.12)      |                         |
| -                       | 0.99<br>(0.57,<br>1.72) | 1.08<br>(0.52,<br>2.27) | -                       | -                       | -                       | -                       | -                       | 0.65<br>(0.36,<br>1.14) | -                            | -                       | - | 0.91<br>(0.51,<br>1.57) | -                       | 0.70<br>(0.40,<br>1.23) | -                       | 1.74<br>(0.54,<br>5.91) | Traz                    | 0.86<br>(0.42,<br>1.72) | -                             | -                       | -                       | 0.84<br>(0.61,<br>1.16)      |                         |
| 0.49<br>(0.29,<br>0.77) | 1.00<br>(0.53,<br>1.84) | 0.87<br>(0.53,<br>1.40) | 0.10<br>(0.01,<br>0.46) | 1.05<br>(0.43,<br>2.42) | -                       | 1.56<br>(1.07,<br>2.28) | 0.89<br>(0.57,<br>1.41) | 0.88<br>(0.73,<br>1.06) | 2.08<br>(0.84,<br>5.12)      | -                       | - | -                       | 0.73<br>(0.49,<br>1.08) | -                       | 1.22<br>(0.85,<br>1.77) | -                       | 0.82<br>(0.52,<br>1.32) | 1.16<br>(0.58,<br>2.40) | Venl                          | -                       | 0.65<br>(0.44,<br>0.97) | 1.00<br>(0.86,<br>1.18)      |                         |
| -                       | -                       | -                       | 0.83<br>(0.55,<br>1.25) | -                       | -                       | -                       | -                       | -                       | -                            | -                       | - | -                       | -                       | -                       | -                       | -                       | -                       | -                       | -                             | Vila                    | -                       | 0.86<br>(0.65,<br>1.14)      |                         |
| -                       | -                       | -                       | -                       | -                       | -                       | 1.04<br>(0.83,<br>1.31) | -                       | -                       | -                            | -                       | - | -                       | -                       | -                       | -                       | -                       | -                       | -                       | -                             | 1.54<br>(1.03,<br>2.27) | -                       | Vort                         | 0.93<br>(0.77,<br>1.12) |
| 0.86<br>(0.70,<br>1.06) | 0.75<br>(0.61,<br>0.93) | 1.01<br>(0.82,<br>1.24) | 1.05<br>(0.83,<br>1.33) | 0.43<br>(0.07,<br>2.40) | 1.07<br>(0.85,<br>1.34) | 1.07<br>(0.91,<br>1.26) | 0.99<br>(0.84,<br>1.17) | 0.86<br>(0.75,<br>0.99) | 1.09<br>(0.81,<br>1.47)      | 1.19<br>(0.92,<br>1.55) | - | 0.91<br>(0.71,<br>1.18) | 0.84<br>(0.62,<br>1.15) | 0.97<br>(0.86,<br>1.09) | 1.07<br>(0.84,<br>1.36) | 1.07<br>(0.89,<br>1.27) | 1.19<br>(0.86,<br>1.65) | 1.00<br>(0.85,<br>1.17) | 1.16<br>(0.88,<br>1.54)       | 1.08<br>(0.89,<br>1.30) | Plac                    |                              |                         |

### 7.1.3 Efficacy continuous

|                         |                         |                         |                         |                         |                         |                         |                         |                         |                         |                         |                        |                         |                         |                         |                         |                         |                         |                         |                         |                         |                      |                      |                      |
|-------------------------|-------------------------|-------------------------|-------------------------|-------------------------|-------------------------|-------------------------|-------------------------|-------------------------|-------------------------|-------------------------|------------------------|-------------------------|-------------------------|-------------------------|-------------------------|-------------------------|-------------------------|-------------------------|-------------------------|-------------------------|----------------------|----------------------|----------------------|
| Ago                     | -                       | -                       | -                       | -                       | -                       | -0.24<br>(-0.49, 0.02)  | 0.11<br>(-0.12, 0.33)   | 0.00<br>(-0.12, 0.13)   | -                       | -                       | -                      | -                       | -                       | -0.16<br>(-0.29, -0.04) | -                       | -                       | -                       | 0.06<br>(-0.14, 0.26)   | -                       | -                       | 0.25<br>(0.15, 0.35) |                      |                      |
| -                       | Amit                    | -                       | -                       | -                       | -                       | -                       | -                       | 0.18<br>(0.01, 0.35)    | -0.02<br>(-0.35, 0.31)  | -                       | -                      | 0.11<br>(-0.18, 0.40)   | 0.09<br>(-0.13, 0.31)   | -                       | 0.07<br>(-0.05, 0.20)   | -                       | 0.19<br>(0.06, 0.32)    | 0.08<br>(-0.25, 0.41)   | 0.11<br>(-0.16, 0.37)   | -                       | -                    | 0.62<br>(0.51, 0.73) |                      |
| -                       | -                       | Bupr                    | -                       | -                       | -                       | -                       | -                       | -0.06<br>(-0.26, 0.15)  | -0.02<br>(-0.21, 0.16)  | -                       | -                      | -                       | -                       | -0.01<br>(-0.39, 0.37)  | -                       | -                       | -0.04<br>(-1.06, 0.93)  | 0.13<br>(-0.28, 0.53)   | -0.00<br>(-0.27, 0.27)  | -                       | -                    | 0.22<br>(0.12, 0.33) |                      |
| -                       | -                       | -                       | Cita                    | -0.38<br>(-0.81, 0.05)  | -                       | -                       | -0.13<br>(-0.23, -0.03) | 0.05<br>(-0.14, 0.25)   | 0.19<br>(-0.13, 0.50)   | -                       | -                      | -                       | 0.02<br>(-0.27, 0.31)   | -                       | 0.13<br>(-0.17, 0.43)   | 0.26<br>(-0.02, 0.53)   | 0.03<br>(-0.16, 0.23)   | -                       | 0.07<br>(-0.30, 0.44)   | -0.04<br>(-0.22, 0.15)  | -                    | -                    | 0.21<br>(0.10, 0.32) |
| -                       | -                       | -                       | Clom                    | 0.38<br>(-0.05, 0.81)   | -                       | -                       | -                       | -0.16<br>(-0.46, 0.14)  | 0.16<br>(-0.30, 0.61)   | -                       | -                      | 0.69<br>(0.26, 1.13)    | -                       | -                       | -0.00<br>(-0.15, 0.15)  | -                       | -0.08<br>(-0.36, 0.19)  | -                       | -0.13<br>(-0.57, 0.29)  | -                       | -                    | -                    |                      |
| -                       | -                       | -                       | -                       | -                       | Desv                    | -                       | -                       | -                       | -                       | -                       | -                      | -                       | -                       | -                       | -                       | -                       | -                       | -                       | -                       | -                       | -                    | 0.24<br>(0.13, 0.35) |                      |
| 0.24<br>(-0.02, 0.49)   | -                       | -                       | -                       | -                       | 0.02<br>(-0.24, 0.28)   | Dulo                    | -0.09<br>(-0.24, 0.07)  | 0.17<br>(-0.14, 0.48)   | -                       | -                       | -                      | -                       | -                       | 0.09<br>(-0.01, 0.21)   | -                       | -                       | -                       | -                       | -0.06<br>(-0.24, 0.13)  | -                       | 0.21<br>(0.10, 0.32) | 0.38<br>(0.30, 0.46) |                      |
| -0.11<br>(-0.33, 0.12)  | -                       | 0.06<br>(-0.15, 0.26)   | 0.13<br>(0.03, 0.23)    | -                       | -                       | -                       | 0.09<br>(-0.07, 0.24)   | Esci                    | 0.03<br>(-0.15, 0.21)   | -                       | -                      | -                       | -                       | -                       | 0.02<br>(-0.14, 0.17)   | -                       | 0.01<br>(-0.17, 0.20)   | -                       | 0.07<br>(-0.15, 0.28)   | -                       | -                    | 0.21<br>(0.13, 0.30) |                      |
| -0.00<br>(-0.13, 0.12)  | -0.18<br>(-0.35, -0.01) | 0.02<br>(-0.16, 0.21)   | -0.05<br>(-0.25, 0.14)  | 0.16<br>(-0.14, 0.46)   | -                       | -0.17<br>(-0.48, 0.14)  | -0.03<br>(-0.21, 0.15)  | Fluo                    | -0.12<br>(-0.40, 0.16)  | -                       | -0.17<br>(-0.46, 0.12) | -0.21<br>(-0.40, -0.02) | -0.05<br>(-0.37, 0.28)  | -0.03<br>(-0.13, 0.06)  | 0.07<br>(-0.10, 0.23)   | -0.08<br>(-0.24, 0.07)  | -0.04<br>(-0.39, 0.32)  | -0.12<br>(-0.21, -0.03) | -                       | -                       | -                    | 0.22<br>(0.15, 0.28) |                      |
| -                       | 0.02<br>(-0.31, 0.35)   | -                       | -0.19<br>(-0.50, 0.13)  | -0.16<br>(-0.61, 0.30)  | -                       | -                       | -                       | 0.12<br>(-0.16, 0.40)   | Fluv                    | -                       | -0.20<br>(-0.50, 0.10) | -0.07<br>(-0.31, 0.16)  | -                       | -0.02<br>(-0.35, 0.32)  | -                       | 0.20<br>(-0.12, 0.52)   | -                       | -0.17<br>(-0.76, 0.42)  | -                       | -                       | -                    | 0.44<br>(0.24, 0.64) |                      |
| -                       | -                       | -                       | -                       | -                       | -                       | -                       | -                       | -                       | -                       | Levo                    | -                      | -                       | -                       | -                       | -                       | -                       | -                       | -                       | -                       | -                       | -                    | 0.27<br>(0.12, 0.41) |                      |
| -                       | -0.11<br>(-0.40, 0.18)  | -                       | -                       | -0.69<br>(-1.13, -0.26) | -                       | -                       | -                       | 0.17<br>(-0.12, 0.46)   | 0.20<br>(-0.10, 0.50)   | -                       | Miln                   | -                       | -                       | -0.07<br>(-0.24, 0.11)  | -                       | -                       | -                       | -                       | -                       | -                       | -                    | -                    |                      |
| -                       | -0.09<br>(-0.31, 0.13)  | -                       | -0.02<br>(-0.31, 0.27)  | -                       | -                       | -                       | -                       | 0.21<br>(0.02, 0.40)    | 0.07<br>(-0.16, 0.31)   | -                       | -                      | Mirt                    | -                       | 0.05<br>(-0.13, 0.23)   | -                       | -                       | 0.31<br>(-0.12, 0.73)   | 0.01<br>(-0.21, 0.22)   | -                       | -                       | 0.37<br>(0.23, 0.51) |                      |                      |
| -                       | -                       | -                       | -                       | -                       | -                       | -                       | -                       | 0.05<br>(-0.28, 0.37)   | -                       | -                       | -                      | -                       | Nefa                    | -0.15<br>(-0.44, 0.14)  | -                       | 0.00<br>(-0.37, 0.36)   | -                       | -                       | -                       | -                       | -                    | 0.31<br>(0.14, 0.47) |                      |
| 0.16<br>(0.04, 0.29)    | -0.07<br>(-0.20, 0.05)  | 0.01<br>(-0.37, 0.39)   | -0.13<br>(-0.43, 0.17)  | 0.00<br>(-0.15, 0.15)   | -                       | -0.09<br>(-0.21, 0.01)  | -0.02<br>(-0.17, 0.14)  | 0.03<br>(-0.06, 0.13)   | 0.02<br>(-0.32, 0.35)   | -                       | 0.07<br>(-0.11, 0.24)  | -0.05<br>(-0.23, 0.13)  | 0.15<br>(-0.14, 0.44)   | Paro                    | 0.15<br>(0.00, 0.30)    | 0.07<br>(-0.14, 0.28)   | 0.19<br>(-0.06, 0.45)   | -0.20<br>(-0.41, 0.00)  | -                       | -                       | -                    | 0.30<br>(0.24, 0.36) |                      |
| -                       | -                       | -                       | -0.26<br>(-0.53, 0.02)  | -                       | -                       | -                       | -                       | -0.07<br>(-0.23, 0.10)  | -                       | -                       | -                      | -                       | -                       | -0.15<br>(-0.30, -0.00) | Rebo                    | -                       | -                       | -0.15<br>(-0.50, 0.20)  | -                       | -                       | -                    | 0.19<br>(0.06, 0.32) |                      |
| -                       | -0.19<br>(-0.32, -0.06) | 0.04<br>(-0.93, 1.06)   | -0.03<br>(-0.23, 0.16)  | 0.08<br>(-0.19, 0.36)   | -                       | -                       | -0.01<br>(-0.20, 0.17)  | 0.08<br>(-0.07, 0.24)   | -0.20<br>(-0.52, 0.12)  | -                       | -                      | -                       | -0.00<br>(-0.36, 0.37)  | -0.07<br>(-0.28, 0.14)  | -                       | Sert                    | -0.13<br>(-0.52, 0.26)  | 0.01<br>(-0.24, 0.26)   | -                       | -                       | 0.28<br>(0.18, 0.37) |                      |                      |
| -                       | -0.08<br>(-0.41, 0.25)  | -0.13<br>(-0.53, 0.28)  | -                       | -                       | -                       | -                       | -                       | 0.04<br>(-0.32, 0.39)   | -                       | -                       | -                      | -0.31<br>(-0.73, 0.12)  | -                       | -0.19<br>(-0.45, 0.06)  | -                       | 0.13<br>(-0.26, 0.52)   | Traz                    | -0.23<br>(-0.62, 0.15)  | -                       | -                       | 0.38<br>(0.21, 0.56) |                      |                      |
| -0.06<br>(-0.26, 0.14)  | -0.11<br>(-0.37, 0.16)  | 0.00<br>(-0.27, 0.27)   | -0.07<br>(-0.44, 0.30)  | 0.13<br>(-0.29, 0.57)   | -                       | 0.06<br>(-0.13, 0.24)   | -0.07<br>(-0.28, 0.15)  | 0.12<br>(-0.03, 0.21)   | 0.17<br>(-0.42, 0.76)   | -                       | -                      | -0.01<br>(-0.22, 0.21)  | -                       | 0.20<br>(-0.00, 0.41)   | 0.15<br>(-0.20, 0.50)   | -0.01<br>(-0.26, 0.24)  | 0.23<br>(-0.15, 0.62)   | Venl                    | -                       | -0.08<br>(-0.27, 0.11)  | 0.34<br>(0.26, 0.42) |                      |                      |
| -                       | -                       | -                       | 0.04<br>(-0.15, 0.22)   | -                       | -                       | -                       | -                       | -                       | -                       | -                       | -                      | -                       | -                       | -                       | -                       | -                       | -                       | -                       | Vila                    | -                       | 0.26<br>(0.13, 0.39) |                      |                      |
| -                       | -                       | -                       | -                       | -                       | -                       | -0.21<br>(-0.32, -0.10) | -                       | -                       | -                       | -                       | -                      | -                       | -                       | -                       | -                       | -                       | -                       | 0.08<br>(-0.11, 0.27)   | -                       | Vort                    | 0.31<br>(0.21, 0.40) |                      |                      |
| -0.25<br>(-0.35, -0.15) | -0.62<br>(-0.73, -0.51) | -0.22<br>(-0.33, -0.12) | -0.21<br>(-0.32, -0.10) | -                       | -0.24<br>(-0.35, -0.13) | -0.38<br>(-0.46, -0.30) | -0.21<br>(-0.30, -0.13) | -0.22<br>(-0.28, -0.15) | -0.44<br>(-0.64, -0.24) | -0.27<br>(-0.41, -0.12) | -                      | -0.37<br>(-0.51, -0.23) | -0.31<br>(-0.47, -0.14) | -0.30<br>(-0.36, -0.24) | -0.19<br>(-0.32, -0.06) | -0.28<br>(-0.37, -0.18) | -0.38<br>(-0.56, -0.21) | -0.34<br>(-0.42, -0.26) | -0.26<br>(-0.39, -0.13) | -0.31<br>(-0.40, -0.21) | -                    | Plac                 |                      |

## 7.1.4 Remission

|                         |                         |                         |                         |                         |                         |                         |                         |                         |                         |                         |   |                         |                         |                         |                         |                         |                              |                         |                         |                         |                         |                         |                         |
|-------------------------|-------------------------|-------------------------|-------------------------|-------------------------|-------------------------|-------------------------|-------------------------|-------------------------|-------------------------|-------------------------|---|-------------------------|-------------------------|-------------------------|-------------------------|-------------------------|------------------------------|-------------------------|-------------------------|-------------------------|-------------------------|-------------------------|-------------------------|
| Ago m                   | -                       | -                       | -                       | -                       | -                       | 1.88<br>(1.03,<br>3.46) | 0.80<br>(0.48,<br>1.33) | 1.01<br>(0.75,<br>1.37) | -                       | -                       | - | -                       | -                       | 1.35<br>(1.01,<br>1.82) | -                       | -                       | -                            | 0.77<br>(0.49,<br>1.21) | -                       | -                       | 0.77<br>(0.63,<br>0.94) |                         |                         |
| -                       | Amit                    | -                       | -                       | -                       | -                       | -                       | -                       | 0.87<br>(0.63,<br>1.21) | 0.93<br>(0.53,<br>1.63) | -                       | - | 0.66<br>(0.29,<br>1.53) | 0.91<br>(0.53,<br>1.57) | 1.12<br>(0.28,<br>4.60) | 0.99<br>(0.77,<br>1.28) | -                       | 0.75<br>(0.56,<br>1.00)      | 0.74<br>(0.43,<br>1.28) | 1.07<br>(0.58,<br>1.97) | -                       | -                       | 0.37<br>(0.29,<br>0.46) |                         |
| -                       | -                       | Bupr                    | -                       | -                       | -                       | -                       | -                       | 1.07<br>(0.69,<br>1.67) | 0.87<br>(0.59,<br>1.30) | -                       | - | -                       | -                       | -                       | 1.03<br>(0.44,<br>2.41) | -                       | 1.30<br>(0.12,<br>16.56<br>) | 0.47<br>(0.20,<br>1.11) | 0.64<br>(0.35,<br>1.20) | -                       | -                       | 0.67<br>(0.54,<br>0.82) |                         |
| -                       | -                       | -                       | Cita                    | 3.72<br>(1.54,<br>9.43) | -                       | -                       | -                       | 1.51<br>(1.22,<br>1.87) | 0.94<br>(0.62,<br>1.44) | 0.54<br>(0.20,<br>1.39) | - | -                       | 0.91<br>(0.48,<br>1.75) | -                       | 0.77<br>(0.38,<br>1.54) | 0.64<br>(0.35,<br>1.16) | 1.06<br>(0.68,<br>1.66)      | -                       | 0.44<br>(0.21,<br>0.90) | 1.06<br>(0.69,<br>1.63) | -                       | 0.73<br>(0.60,<br>0.90) |                         |
| -                       | -                       | -                       | Clom                    | 0.27<br>(0.11,<br>0.65) | -                       | -                       | -                       | 1.41<br>(0.86,<br>2.34) | 0.64<br>(0.22,<br>1.80) | -                       | - | 0.61<br>(0.25,<br>1.45) | -                       | -                       | 0.97<br>(0.70,<br>1.33) | -                       | 1.09<br>(0.60,<br>2.01)      | -                       | 1.34<br>(0.48,<br>3.85) | -                       | -                       | -                       |                         |
| -                       | -                       | -                       | -                       | -                       | -                       | Desv                    | 1.37<br>(0.75,<br>2.49) | -                       | -                       | -                       | - | -                       | -                       | -                       | -                       | -                       | -                            | -                       | -                       | -                       | -                       | -                       | 0.71<br>(0.59,<br>0.87) |
| 0.53<br>(0.29,<br>0.97) | -                       | -                       | -                       | -                       | -                       | 0.73<br>(0.40,<br>1.33) | Dulo                    | 1.03<br>(0.73,<br>1.46) | 0.63<br>(0.32,<br>1.23) | -                       | - | -                       | -                       | -                       | 0.97<br>(0.76,<br>1.23) | -                       | -                            | -                       | -                       | 1.14<br>(0.75,<br>1.73) | -                       | 0.78<br>(0.61,<br>0.99) | 0.56<br>(0.49,<br>0.65) |
| 1.25<br>(0.75,<br>2.08) | -                       | 0.93<br>(0.60,<br>1.45) | 0.66<br>(0.53,<br>0.82) | -                       | -                       | 0.98<br>(0.69,<br>1.38) | Esci                    | 1.00<br>(0.69,<br>1.46) | -                       | -                       | - | -                       | -                       | -                       | 0.96<br>(0.68,<br>1.35) | -                       | 1.22<br>(0.71,<br>2.10)      | -                       | 1.00<br>(0.62,<br>1.63) | -                       | -                       | -                       | 0.69<br>(0.59,<br>0.81) |
| 0.99<br>(0.73,<br>1.34) | 1.14<br>(0.82,<br>1.58) | 1.14<br>(0.77,<br>1.70) | 1.06<br>(0.70,<br>1.62) | 0.71<br>(0.43,<br>1.17) | -                       | 1.58<br>(0.81,<br>3.13) | 1.00<br>(0.69,<br>1.46) | Fluo                    | 1.18<br>(0.66,<br>2.11) | -                       | - | 1.31<br>(0.65,<br>2.72) | 1.14<br>(0.82,<br>1.62) | 0.94<br>(0.44,<br>2.02) | 1.10<br>(0.89,<br>1.36) | 0.84<br>(0.58,<br>1.20) | 1.17<br>(0.86,<br>1.60)      | 1.05<br>(0.57,<br>1.91) | 1.18<br>(0.97,<br>1.44) | -                       | -                       | -                       | 0.73<br>(0.64,<br>0.83) |
| -                       | 1.07<br>(0.61,<br>1.88) | -                       | 1.84<br>(0.72,<br>5.00) | 1.57<br>(0.56,<br>4.57) | -                       | -                       | -                       | 0.85<br>(0.47,<br>1.51) | Fluv                    | -                       | - | -                       | 0.84<br>(0.52,<br>1.36) | -                       | 1.13<br>(0.50,<br>2.46) | -                       | 0.68<br>(0.34,<br>1.36)      | -                       | 1.93<br>(0.76,<br>5.01) | -                       | -                       | -                       | 0.58<br>(0.39,<br>0.86) |
| -                       | -                       | -                       | -                       | -                       | -                       | -                       | -                       | -                       | -                       | Levo                    | - | -                       | -                       | -                       | -                       | -                       | -                            | -                       | -                       | -                       | -                       | -                       | 0.75<br>(0.58,<br>0.97) |
| -                       | 1.52<br>(0.66,<br>3.49) | -                       | -                       | 1.65<br>(0.69,<br>3.99) | -                       | -                       | -                       | 0.76<br>(0.37,<br>1.55) | -                       | -                       | - | Miin                    | -                       | -                       | 1.04<br>(0.70,<br>1.53) | -                       | -                            | -                       | -                       | -                       | -                       | -                       | -                       |
| -                       | 1.10<br>(0.64,<br>1.87) | -                       | 1.09<br>(0.57,<br>2.09) | -                       | -                       | -                       | -                       | 0.87<br>(0.62,<br>1.23) | 1.19<br>(0.73,<br>1.94) | -                       | - | -                       | Mirta                   | -                       | 0.89<br>(0.63,<br>1.27) | -                       | 0.99<br>(0.55,<br>1.79)      | 0.67<br>(0.17,<br>2.46) | 0.97<br>(0.58,<br>1.63) | -                       | -                       | 0.59<br>(0.43,<br>0.80) |                         |
| -                       | 0.89<br>(0.22,<br>3.63) | -                       | -                       | -                       | -                       | -                       | -                       | 1.06<br>(0.49,<br>2.29) | -                       | -                       | - | -                       | Nefa                    | -                       | 1.33<br>(0.63,<br>2.82) | -                       | 0.94<br>(0.40,<br>2.19)      | -                       | -                       | -                       | -                       | -                       | 0.50<br>(0.35,<br>0.72) |
| 0.74<br>(0.55,<br>0.99) | 1.01<br>(0.78,<br>1.31) | 0.97<br>(0.41,<br>2.26) | 1.30<br>(0.65,<br>2.63) | 1.04<br>(0.75,<br>1.43) | -                       | 1.03<br>(0.81,<br>1.31) | 1.04<br>(0.74,<br>1.47) | 0.91<br>(0.73,<br>1.12) | 0.89<br>(0.41,<br>2.00) | -                       | - | 0.97<br>(0.65,<br>1.43) | 1.13<br>(0.79,<br>1.59) | 0.75<br>(0.35,<br>1.59) | Paro                    | 0.80<br>(0.58,<br>1.11) | 0.98<br>(0.62,<br>1.54)      | 0.75<br>(0.42,<br>1.33) | 1.55<br>(1.04,<br>2.34) | -                       | -                       | -                       | 0.61<br>(0.54,<br>0.68) |
| -                       | -                       | -                       | 1.57<br>(0.86,<br>2.86) | -                       | -                       | -                       | -                       | 1.19<br>(0.83,<br>1.71) | -                       | -                       | - | -                       | -                       | -                       | 1.24<br>(0.90,<br>1.72) | Rebo                    | -                            | -                       | 0.95<br>(0.42,<br>2.18) | -                       | -                       | -                       | 0.82<br>(0.65,<br>1.03) |
| -                       | 1.34<br>(1.00,<br>1.80) | 0.77<br>(0.06,<br>8.17) | 0.94<br>(0.60,<br>1.47) | 0.92<br>(0.50,<br>1.67) | -                       | -                       | 0.82<br>(0.48,<br>1.40) | 0.85<br>(0.63,<br>1.16) | 1.47<br>(0.74,<br>2.96) | -                       | - | -                       | 1.01<br>(0.56,<br>1.83) | 1.07<br>(0.46,<br>2.48) | 1.02<br>(0.65,<br>1.60) | -                       | Sert                         | 1.59<br>(0.71,<br>3.67) | 1.25<br>(0.81,<br>1.94) | -                       | -                       | -                       | 0.67<br>(0.55,<br>0.83) |
| -                       | 1.35<br>(0.78,<br>2.34) | 2.13<br>(0.90,<br>5.10) | -                       | -                       | -                       | -                       | -                       | 0.95<br>(0.52,<br>1.75) | -                       | -                       | - | -                       | 1.50<br>(0.41,<br>5.97) | -                       | 1.34<br>(0.75,<br>2.37) | -                       | 0.63<br>(0.27,<br>1.41)      | Traz                    | 2.53<br>(0.92,<br>7.69) | -                       | -                       | -                       | 0.72<br>(0.52,<br>1.02) |
| 1.31<br>(0.83,<br>2.05) | 0.94<br>(0.51,<br>1.72) | 1.55<br>(0.84,<br>2.90) | 2.28<br>(1.12,<br>4.82) | 0.74<br>(0.26,<br>2.07) | -                       | 0.88<br>(0.58,<br>1.33) | 1.00<br>(0.61,<br>1.61) | 0.85<br>(0.70,<br>1.03) | 0.52<br>(0.20,<br>1.31) | -                       | - | -                       | 1.03<br>(0.62,<br>1.71) | -                       | 0.64<br>(0.43,<br>0.96) | 1.05<br>(0.46,<br>2.37) | 0.80<br>(0.52,<br>1.23)      | 0.40<br>(0.13,<br>1.09) | Venl                    | -                       | 1.09<br>(0.72,<br>1.64) | -                       | 0.56<br>(0.48,<br>0.65) |
| -                       | -                       | -                       | 0.95<br>(0.61,<br>1.46) | -                       | -                       | -                       | -                       | -                       | -                       | -                       | - | -                       | -                       | -                       | -                       | -                       | -                            | -                       | -                       | Vila                    | -                       | -                       | 0.69<br>(0.54,<br>0.86) |
| -                       | -                       | -                       | -                       | -                       | -                       | 1.28<br>(1.01,<br>1.64) | -                       | -                       | -                       | -                       | - | -                       | -                       | -                       | -                       | -                       | -                            | -                       | 0.92<br>(0.61,<br>1.39) | -                       | Vort                    | -                       | 0.67<br>(0.57,<br>0.79) |
| 1.30<br>(1.06,<br>1.59) | 2.71<br>(2.16,<br>3.44) | 1.50<br>(1.23,<br>1.84) | 1.36<br>(1.11,<br>1.67) | -                       | 1.40<br>(1.15,<br>1.71) | 1.77<br>(1.54,<br>2.04) | 1.45<br>(1.24,<br>1.70) | 1.37<br>(1.20,<br>1.56) | 1.73<br>(1.16,<br>2.59) | 1.33<br>(1.03,<br>1.73) | - | -                       | 1.70<br>(1.26,<br>2.31) | 2.00<br>(1.40,<br>2.89) | 1.65<br>(1.47,<br>1.86) | 1.22<br>(0.97,<br>1.53) | 1.48<br>(1.20,<br>1.83)      | 1.38<br>(0.98,<br>1.94) | 1.79<br>(1.53,<br>2.09) | 1.46<br>(1.16,<br>1.84) | 1.48<br>(1.26,<br>1.75) | Plac                    | -                       |



## 7.1.5 Dropouts due to adverse events

|                         |                          |                          |                         |                           |                         |                           |                          |                          |                           |                         |   |                         |                          |                         |                         |                         |                          |                         |                          |                         |                         |                          |                         |
|-------------------------|--------------------------|--------------------------|-------------------------|---------------------------|-------------------------|---------------------------|--------------------------|--------------------------|---------------------------|-------------------------|---|-------------------------|--------------------------|-------------------------|-------------------------|-------------------------|--------------------------|-------------------------|--------------------------|-------------------------|-------------------------|--------------------------|-------------------------|
| Ago m                   | -                        | -                        | -                       | -                         | -                       | 1.09<br>(0.46,<br>2.52)   | 3.46<br>(1.32,<br>10.23) | 1.41<br>(0.89,<br>2.23)  | -                         | -                       | - | -                       | -                        | 1.31<br>(0.84,<br>2.05) | -                       | -                       | -                        | 3.85<br>(1.78,<br>8.79) | -                        | -                       | 0.94<br>(0.66,<br>1.33) |                          |                         |
| -                       | Amit                     | 1.97<br>(0.21,<br>52.51) | -                       | -                         | -                       | -                         | -                        | 0.35<br>(0.21,<br>0.58)  | 0.55<br>(0.28,<br>1.08)   | -                       | - | 0.54<br>(0.10,<br>2.70) | 0.71<br>(0.39,<br>1.26)  | -                       | 0.97<br>(0.68,<br>1.35) | -                       | 0.86<br>(0.60,<br>1.23)  | 0.94<br>(0.38,<br>2.42) | 0.99<br>(0.37,<br>2.68)  | -                       | -                       | 0.31<br>(0.22,<br>0.43)  |                         |
| -                       | 0.51<br>(0.02,<br>4.70)  | Bupr                     | -                       | -                         | -                       | -                         | -                        | 0.68<br>(0.29,<br>1.66)  | 0.73<br>(0.34,<br>1.54)   | -                       | - | -                       | -                        | -                       | 0.57<br>(0.15,<br>1.96) | -                       | -                        | 1.37<br>(0.53,<br>3.65) | 1.85<br>(0.78,<br>4.61)  | -                       | -                       | 0.49<br>(0.34,<br>0.70)  |                         |
| -                       | -                        | -                        | Cita                    | 7.35<br>(0.90,<br>223.18) | -                       | -                         | -                        | 0.88<br>(0.54,<br>1.42)  | 0.60<br>(0.29,<br>1.21)   | 1.84<br>(0.82,<br>4.29) | - | -                       | 2.07<br>(0.59,<br>8.59)  | -                       | 1.94<br>(0.66,<br>5.37) | -                       | 2.33<br>(0.40,<br>22.07) | -                       | 7.03<br>(1.47,<br>58.79) | 1.50<br>(0.70,<br>3.29) | -                       | 0.41<br>(0.26,<br>0.64)  |                         |
| -                       | -                        | -                        | 0.14<br>(0.00,<br>1.11) | Clom                      | -                       | -                         | -                        | 0.29<br>(0.09,<br>0.76)  | 2.75<br>(0.19,<br>192.10) | -                       | - | 0.51<br>(0.15,<br>1.62) | -                        | -                       | 0.52<br>(0.34,<br>0.80) | -                       | 0.41<br>(0.18,<br>0.92)  | -                       | 0.61<br>(0.19,<br>1.91)  | -                       | -                       | 1.09<br>(0.09,<br>11.46) |                         |
| -                       | -                        | -                        | -                       | -                         | Desv                    | 2.22<br>(1.03,<br>4.96)   | -                        | -                        | -                         | -                       | - | -                       | -                        | -                       | -                       | -                       | -                        | -                       | -                        | -                       | -                       | -                        | 0.58<br>(0.39,<br>0.85) |
| 0.91<br>(0.40,<br>2.17) | -                        | -                        | -                       | -                         | 0.45<br>(0.20,<br>0.98) | Dulo                      | 0.44<br>(0.25,<br>0.73)  | 0.18<br>(0.00,<br>1.48)  | -                         | -                       | - | -                       | -                        | -                       | 0.98<br>(0.64,<br>1.48) | -                       | -                        | -                       | -                        | 0.50<br>(0.28,<br>0.88) | -                       | 0.93<br>(0.66,<br>1.33)  | 0.48<br>(0.37,<br>0.62) |
| 0.29<br>(0.10,<br>0.76) | -                        | 1.48<br>(0.60,<br>3.45)  | 1.13<br>(0.70,<br>1.84) | -                         | -                       | 2.28<br>(1.37,<br>3.94)   | Esci                     | 1.36<br>(0.76,<br>2.48)  | -                         | -                       | - | -                       | -                        | -                       | 0.77<br>(0.32,<br>1.75) | -                       | 0.82<br>(0.34,<br>1.97)  | -                       | -                        | 2.42<br>(1.21,<br>5.03) | -                       | -                        | 0.53<br>(0.40,<br>0.71) |
| 0.71<br>(0.45,<br>1.13) | 2.87<br>(1.72,<br>4.87)  | 1.37<br>(0.65,<br>2.97)  | 1.65<br>(0.83,<br>3.42) | 3.51<br>(1.32,<br>10.62)  | -                       | 5.44<br>(0.68,<br>298.27) | 0.73<br>(0.40,<br>1.32)  | Fluo                     | 0.97<br>(0.08,<br>10.00)  | -                       | - | 0.63<br>(0.30,<br>1.35) | 1.34<br>(0.82,<br>2.23)  | 1.30<br>(0.40,<br>5.45) | 1.28<br>(0.93,<br>1.73) | 1.88<br>(1.14,<br>3.14) | 0.70<br>(0.38,<br>1.23)  | 1.11<br>(0.42,<br>2.81) | 1.57<br>(1.17,<br>2.09)  | -                       | -                       | -                        | 0.54<br>(0.43,<br>0.68) |
| -                       | 1.82<br>(0.93,<br>3.60)  | -                        | 0.54<br>(0.23,<br>1.22) | 0.36<br>(0.01,<br>5.23)   | -                       | -                         | -                        | 1.03<br>(0.10,<br>12.68) | Fluv                      | -                       | - | 0.41<br>(0.14,<br>1.25) | 1.72<br>(0.83,<br>3.84)  | -                       | 0.65<br>(0.22,<br>1.75) | -                       | 0.35<br>(0.09,<br>1.14)  | -                       | -                        | -                       | -                       | -                        | 0.31<br>(0.20,<br>0.46) |
| -                       | -                        | -                        | -                       | -                         | -                       | -                         | -                        | -                        | -                         | Levo                    | - | -                       | -                        | -                       | -                       | -                       | -                        | -                       | -                        | -                       | -                       | -                        | 0.39<br>(0.25,<br>0.60) |
| -                       | 1.86<br>(0.37,<br>10.39) | -                        | -                       | 1.96<br>(0.62,<br>6.72)   | -                       | -                         | -                        | 1.59<br>(0.74,<br>3.38)  | 2.41<br>(0.80,<br>7.19)   | -                       | - | Miln                    | -                        | -                       | -                       | -                       | -                        | -                       | -                        | 1.10<br>(0.66,<br>1.83) | -                       | -                        | -                       |
| -                       | 1.41<br>(0.79,<br>2.54)  | -                        | 0.48<br>(0.12,<br>1.69) | -                         | -                       | -                         | -                        | 0.74<br>(0.45,<br>1.23)  | 0.58<br>(0.26,<br>1.20)   | -                       | - | Mirt                    | -                        | -                       | 1.44<br>(0.85,<br>2.44) | -                       | 0.21<br>(0.06,<br>0.60)  | 1.80<br>(0.68,<br>5.06) | 1.46<br>(0.85,<br>2.52)  | -                       | -                       | -                        | 0.61<br>(0.41,<br>0.88) |
| -                       | -                        | -                        | -                       | -                         | -                       | -                         | -                        | 0.77<br>(0.18,<br>2.52)  | -                         | -                       | - | -                       | Nefa                     | 0.69<br>(0.29,<br>1.58) | -                       | 0.56<br>(0.21,<br>1.53) | -                        | -                       | -                        | -                       | -                       | -                        | 0.58<br>(0.37,<br>0.91) |
| 0.76<br>(0.49,<br>1.18) | 1.04<br>(0.74,<br>1.46)  | 1.74<br>(0.51,<br>6.59)  | 0.52<br>(0.19,<br>1.53) | 1.93<br>(1.26,<br>2.97)   | -                       | 1.02<br>(0.68,<br>1.55)   | 1.30<br>(0.57,<br>3.12)  | 0.78<br>(0.58,<br>1.07)  | 1.55<br>(0.57,<br>4.52)   | -                       | - | 0.91<br>(0.55,<br>1.52) | 0.70<br>(0.41,<br>1.18)  | 1.44<br>(0.63,<br>3.46) | Paro                    | 1.40<br>(0.91,<br>2.15) | 0.50<br>(0.15,<br>1.52)  | 1.49<br>(0.69,<br>3.27) | 0.79<br>(0.45,<br>1.38)  | -                       | -                       | -                        | 0.48<br>(0.40,<br>0.58) |
| -                       | -                        | -                        | -                       | -                         | -                       | -                         | -                        | 0.53<br>(0.32,<br>0.88)  | -                         | -                       | - | -                       | -                        | -                       | 0.72<br>(0.46,<br>1.10) | Rebo                    | -                        | -                       | -                        | 1.11<br>(0.32,<br>3.97) | -                       | -                        | 0.45<br>(0.31,<br>0.65) |
| -                       | 1.17<br>(0.81,<br>1.67)  | -                        | 0.43<br>(0.05,<br>2.53) | 2.44<br>(1.09,<br>5.64)   | -                       | -                         | 1.22<br>(0.51,<br>2.94)  | 1.44<br>(0.81,<br>2.62)  | 2.86<br>(0.87,<br>11.68)  | -                       | - | -                       | 4.85<br>(1.68,<br>15.69) | 1.78<br>(0.65,<br>4.69) | 2.00<br>(0.66,<br>6.46) | -                       | Sertr                    | 0.26<br>(0.03,<br>1.33) | 2.36<br>(1.02,<br>6.05)  | -                       | -                       | -                        | 0.36<br>(0.26,<br>0.50) |
| -                       | 1.06<br>(0.41,<br>2.60)  | 0.73<br>(0.27,<br>1.87)  | -                       | -                         | -                       | -                         | -                        | 0.90<br>(0.36,<br>2.37)  | -                         | -                       | - | -                       | 0.56<br>(0.20,<br>1.47)  | -                       | 0.67<br>(0.31,<br>1.45) | -                       | 3.85<br>(0.75,<br>31.94) | Trazo                   | 0.68<br>(0.27,<br>1.65)  | -                       | -                       | -                        | 0.27<br>(0.15,<br>0.50) |
| 0.26<br>(0.11,<br>0.56) | 1.01<br>(0.37,<br>2.72)  | 0.54<br>(0.22,<br>1.28)  | 0.14<br>(0.02,<br>0.68) | 1.63<br>(0.52,<br>5.40)   | -                       | 2.02<br>(1.13,<br>3.59)   | 0.41<br>(0.20,<br>0.82)  | 0.64<br>(0.48,<br>0.85)  | -                         | -                       | - | 0.68<br>(0.40,<br>1.17) | -                        | 1.27<br>(0.72,<br>2.20) | 0.90<br>(0.25,<br>3.16) | 0.42<br>(0.17,<br>0.98) | 1.48<br>(0.60,<br>3.71)  | Venl                    | -                        | -                       | 0.37<br>(0.20,<br>0.67) | 0.33<br>(0.26,<br>0.43)  |                         |
| -                       | -                        | -                        | 0.67<br>(0.30,<br>1.42) | -                         | -                       | -                         | -                        | -                        | -                         | -                       | - | -                       | -                        | -                       | -                       | -                       | -                        | -                       | -                        | Vila                    | -                       | -                        | 0.45<br>(0.27,<br>0.72) |
| -                       | -                        | -                        | -                       | -                         | -                       | 1.07<br>(0.75,<br>1.52)   | -                        | -                        | -                         | -                       | - | -                       | -                        | -                       | -                       | -                       | -                        | -                       | 2.67<br>(1.49,<br>4.95)  | -                       | Vort                    | -                        | 0.66<br>(0.49,<br>0.89) |
| 1.06<br>(0.75,<br>1.52) | 3.23<br>(2.34,<br>4.49)  | 2.05<br>(1.43,<br>2.97)  | 2.44<br>(1.57,<br>3.84) | 0.92<br>(0.09,<br>10.70)  | 1.72<br>(1.18,<br>2.53) | 2.09<br>(1.62,<br>2.72)   | 1.88<br>(1.41,<br>2.52)  | 1.85<br>(1.48,<br>2.33)  | 3.27<br>(2.17,<br>5.07)   | 2.55<br>(1.66,<br>4.01) | - | 1.64<br>(1.14,<br>2.41) | 1.72<br>(1.09,<br>2.74)  | 2.09<br>(1.73,<br>2.52) | 2.22<br>(1.54,<br>3.22) | 2.75<br>(1.98,<br>3.83) | 3.65<br>(1.98,<br>6.80)  | 3.02<br>(2.34,<br>3.92) | 2.24<br>(1.38,<br>3.67)  | 1.51<br>(1.12,<br>2.06) | Plac                    | -                        | -                       |

## 7.2 Results from network meta-analyses

Below we present the network diagram, the forest plot of the effect estimate for each active intervention versus placebo, and the league table of all comparisons for each of the two primary and three secondary outcomes.

### 7.2.1 Response

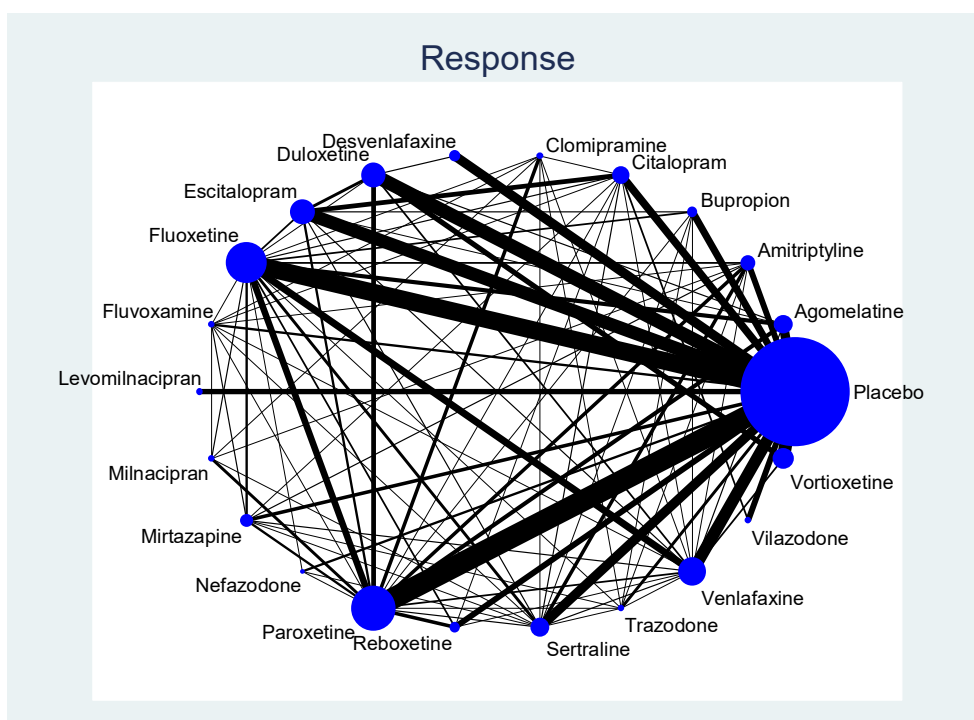

## Response

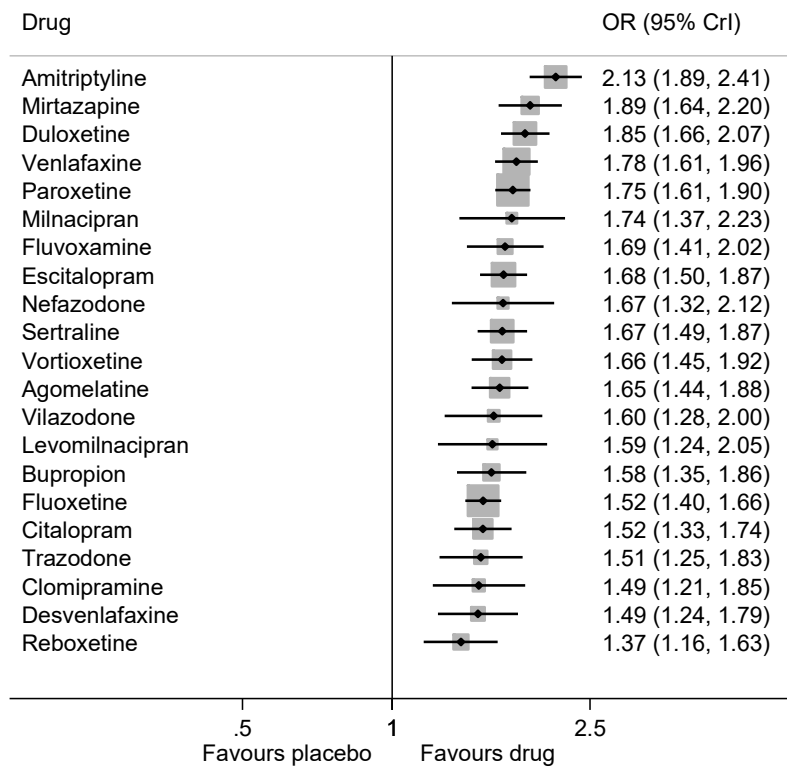

|                         |                         |                         |                         |                         |                         |                         |                         |                         |                         |                         |                         |                         |                         |                         |                         |                         |                         |                         |                         |                         |              |  |
|-------------------------|-------------------------|-------------------------|-------------------------|-------------------------|-------------------------|-------------------------|-------------------------|-------------------------|-------------------------|-------------------------|-------------------------|-------------------------|-------------------------|-------------------------|-------------------------|-------------------------|-------------------------|-------------------------|-------------------------|-------------------------|--------------|--|
| Ago m                   |                         |                         |                         |                         |                         |                         |                         |                         |                         |                         |                         |                         |                         |                         |                         |                         |                         |                         |                         |                         |              |  |
| 0.77<br>(0.65,<br>0.92) | Amit                    |                         |                         |                         |                         |                         |                         |                         |                         |                         |                         |                         |                         |                         |                         |                         |                         |                         |                         |                         |              |  |
| 1.04<br>(0.85,<br>1.27) | 1.35<br>(1.10,<br>1.64) | Bupr                    |                         |                         |                         |                         |                         |                         |                         |                         |                         |                         |                         |                         |                         |                         |                         |                         |                         |                         |              |  |
| 1.08<br>(0.90,<br>1.30) | 1.40<br>(1.18,<br>1.67) | 1.04<br>(0.85,<br>1.28) | Cita                    |                         |                         |                         |                         |                         |                         |                         |                         |                         |                         |                         |                         |                         |                         |                         |                         |                         |              |  |
| 1.10<br>(0.86,<br>1.41) | 1.43<br>(1.13,<br>1.81) | 1.06<br>(0.81,<br>1.38) | 1.02<br>(0.80,<br>1.30) | Clom                    |                         |                         |                         |                         |                         |                         |                         |                         |                         |                         |                         |                         |                         |                         |                         |                         |              |  |
| 1.11<br>(0.88,<br>1.39) | 1.43<br>(1.15,<br>1.79) | 1.06<br>(0.83,<br>1.36) | 1.02<br>(0.81,<br>1.28) | 1.00<br>(0.76,<br>1.34) | Desv                    |                         |                         |                         |                         |                         |                         |                         |                         |                         |                         |                         |                         |                         |                         |                         |              |  |
| 0.89<br>(0.75,<br>1.05) | 1.15<br>(0.98,<br>1.35) | 0.86<br>(0.71,<br>1.04) | 0.82<br>(0.69,<br>1.02) | 0.81<br>(0.64,<br>1.02) | 0.80<br>(0.65,<br>0.99) | Dulo                    |                         |                         |                         |                         |                         |                         |                         |                         |                         |                         |                         |                         |                         |                         |              |  |
| 0.98<br>(0.84,<br>1.16) | 1.27<br>(1.09,<br>1.49) | 0.95<br>(0.78,<br>1.14) | 0.91<br>(0.78,<br>1.05) | 0.89<br>(0.71,<br>1.13) | 0.89<br>(0.72,<br>1.10) | 1.11<br>(0.95,<br>1.28) | Esci                    |                         |                         |                         |                         |                         |                         |                         |                         |                         |                         |                         |                         |                         |              |  |
| 1.08<br>(0.94,<br>1.25) | 1.40<br>(1.22,<br>1.60) | 1.04<br>(0.87,<br>1.24) | 1.00<br>(0.86,<br>1.16) | 0.98<br>(0.79,<br>1.22) | 0.98<br>(0.80,<br>1.19) | 1.21<br>(1.06,<br>1.39) | 1.10<br>(0.97,<br>1.25) | Fluo                    |                         |                         |                         |                         |                         |                         |                         |                         |                         |                         |                         |                         |              |  |
| 0.98<br>(0.78,<br>1.21) | 1.27<br>(1.03,<br>1.55) | 0.94<br>(0.74,<br>1.19) | 0.90<br>(0.73,<br>1.12) | 0.89<br>(0.68,<br>1.16) | 0.88<br>(0.68,<br>1.14) | 1.10<br>(0.89,<br>1.35) | 0.99<br>(0.81,<br>1.22) | 0.90<br>(0.75,<br>1.09) | Fluvo                   |                         |                         |                         |                         |                         |                         |                         |                         |                         |                         |                         |              |  |
| 1.03<br>(0.78,<br>1.37) | 1.34<br>(1.01,<br>1.77) | 0.99<br>(0.74,<br>1.34) | 0.96<br>(0.72,<br>1.27) | 0.94<br>(0.67,<br>1.31) | 0.93<br>(0.68,<br>1.28) | 1.16<br>(0.88,<br>1.53) | 1.05<br>(0.80,<br>1.39) | 0.96<br>(0.73,<br>1.25) | 1.06<br>(0.78,<br>1.44) | Levo                    |                         |                         |                         |                         |                         |                         |                         |                         |                         |                         |              |  |
| 0.94<br>(0.72,<br>1.24) | 1.23<br>(0.95,<br>1.58) | 0.91<br>(0.68,<br>1.21) | 0.87<br>(0.66,<br>1.15) | 0.86<br>(0.63,<br>1.16) | 0.85<br>(0.63,<br>1.16) | 1.06<br>(0.81,<br>1.39) | 0.96<br>(0.74,<br>1.25) | 0.88<br>(0.68,<br>1.12) | 0.97<br>(0.73,<br>1.28) | 0.91<br>(0.64,<br>1.30) | Miln                    |                         |                         |                         |                         |                         |                         |                         |                         |                         |              |  |
| 0.87<br>(0.72,<br>1.05) | 1.13<br>(0.94,<br>1.34) | 0.84<br>(0.68,<br>1.04) | 0.80<br>(0.66,<br>0.97) | 0.79<br>(0.61,<br>1.01) | 0.79<br>(0.62,<br>0.99) | 0.98<br>(0.81,<br>1.17) | 0.88<br>(0.74,<br>1.06) | 0.80<br>(0.69,<br>0.94) | 0.89<br>(0.72,<br>1.10) | 0.84<br>(0.63,<br>1.13) | 0.92<br>(0.70,<br>1.21) | Mirt                    |                         |                         |                         |                         |                         |                         |                         |                         |              |  |
| 0.98<br>(0.75,<br>1.29) | 1.28<br>(0.98,<br>1.66) | 0.95<br>(0.71,<br>1.26) | 0.91<br>(0.70,<br>1.19) | 0.89<br>(0.65,<br>1.23) | 0.89<br>(0.66,<br>1.20) | 1.11<br>(0.85,<br>1.44) | 1.00<br>(0.77,<br>1.30) | 0.91<br>(0.71,<br>1.17) | 1.01<br>(0.75,<br>1.36) | 0.95<br>(0.67,<br>1.35) | 1.04<br>(0.74,<br>1.47) | 1.13<br>(0.86,<br>1.50) | Nefa                    |                         |                         |                         |                         |                         |                         |                         |              |  |
| 0.94<br>(0.82,<br>1.08) | 1.22<br>(1.07,<br>1.39) | 0.91<br>(0.76,<br>1.08) | 0.87<br>(0.75,<br>1.01) | 0.85<br>(0.69,<br>1.06) | 0.85<br>(0.69,<br>1.04) | 1.06<br>(0.93,<br>1.20) | 0.96<br>(0.84,<br>1.09) | 0.87<br>(0.79,<br>0.96) | 0.96<br>(0.80,<br>1.16) | 0.91<br>(0.70,<br>1.19) | 1.00<br>(0.78,<br>1.27) | 1.08<br>(0.93,<br>1.26) | 0.96<br>(0.75,<br>1.22) | Paro                    |                         |                         |                         |                         |                         |                         |              |  |
| 1.20<br>(0.97,<br>1.48) | 1.55<br>(1.27,<br>1.91) | 1.15<br>(0.92,<br>1.45) | 1.11<br>(0.90,<br>1.36) | 1.09<br>(0.83,<br>1.42) | 1.08<br>(0.84,<br>1.39) | 1.35<br>(1.10,<br>1.65) | 1.22<br>(1.00,<br>1.49) | 1.11<br>(0.93,<br>1.33) | 1.23<br>(0.96,<br>1.57) | 1.16<br>(0.85,<br>1.57) | 1.27<br>(0.95,<br>1.70) | 1.38<br>(1.11,<br>1.72) | 1.22<br>(0.91,<br>1.63) | 1.27<br>(1.06,<br>1.52) | Rebo                    |                         |                         |                         |                         |                         |              |  |
| 0.99<br>(0.83,<br>1.17) | 1.28<br>(1.10,<br>1.48) | 0.95<br>(0.78,<br>1.15) | 0.91<br>(0.78,<br>1.08) | 0.90<br>(0.71,<br>1.13) | 0.89<br>(0.72,<br>1.11) | 1.11<br>(0.98,<br>1.30) | 1.01<br>(0.87,<br>1.17) | 0.92<br>(0.80,<br>1.04) | 1.01<br>(0.83,<br>1.24) | 0.96<br>(0.72,<br>1.26) | 1.05<br>(0.80,<br>1.36) | 1.14<br>(0.95,<br>1.36) | 1.00<br>(0.78,<br>1.30) | 1.05<br>(0.92,<br>1.20) | 0.82<br>(0.67,<br>1.01) | Sert                    |                         |                         |                         |                         |              |  |
| 1.09<br>(0.87,<br>1.37) | 1.41<br>(1.14,<br>1.75) | 1.05<br>(0.82,<br>1.34) | 1.01<br>(0.80,<br>1.27) | 0.99<br>(0.75,<br>1.31) | 0.99<br>(0.75,<br>1.29) | 1.23<br>(0.98,<br>1.53) | 1.11<br>(0.89,<br>1.38) | 1.01<br>(0.83,<br>1.24) | 1.12<br>(0.86,<br>1.44) | 1.05<br>(0.77,<br>1.45) | 1.15<br>(0.85,<br>1.57) | 1.26<br>(1.00,<br>1.58) | 1.11<br>(0.82,<br>1.50) | 1.16<br>(0.95,<br>1.42) | 0.91<br>(0.71,<br>1.18) | 1.10<br>(0.89,<br>1.37) | Trazo                   |                         |                         |                         |              |  |
| 0.93<br>(0.79,<br>1.08) | 1.20<br>(1.04,<br>1.39) | 0.89<br>(0.74,<br>1.07) | 0.86<br>(0.73,<br>1.00) | 0.84<br>(0.67,<br>1.05) | 0.84<br>(0.68,<br>1.03) | 1.04<br>(0.90,<br>1.20) | 0.94<br>(0.82,<br>1.08) | 0.86<br>(0.77,<br>0.96) | 0.95<br>(0.78,<br>1.16) | 0.90<br>(0.68,<br>1.18) | 0.98<br>(0.76,<br>1.27) | 1.07<br>(0.90,<br>1.26) | 0.94<br>(0.73,<br>1.21) | 0.98<br>(0.87,<br>1.11) | 0.77<br>(0.64,<br>0.93) | 0.94<br>(0.81,<br>1.08) | 0.85<br>(0.69,<br>1.05) | Venl                    |                         |                         |              |  |
| 1.03<br>(0.79,<br>1.34) | 1.33<br>(1.03,<br>1.72) | 0.99<br>(0.75,<br>1.30) | 0.95<br>(0.74,<br>1.22) | 0.93<br>(0.69,<br>1.27) | 0.93<br>(0.70,<br>1.25) | 1.16<br>(0.90,<br>1.49) | 1.05<br>(0.82,<br>1.34) | 0.95<br>(0.75,<br>1.21) | 1.05<br>(0.79,<br>1.41) | 1.00<br>(0.71,<br>1.40) | 1.09<br>(0.78,<br>1.52) | 1.18<br>(0.91,<br>1.55) | 1.04<br>(0.75,<br>1.45) | 1.09<br>(0.86,<br>1.39) | 0.86<br>(0.65,<br>1.14) | 1.04<br>(0.81,<br>1.34) | 0.94<br>(0.70,<br>1.27) | 1.11<br>(0.87,<br>1.42) | Vila                    |                         |              |  |
| 0.99<br>(0.82,<br>1.20) | 1.28<br>(1.07,<br>1.54) | 0.95<br>(0.77,<br>1.18) | 0.92<br>(0.75,<br>1.11) | 0.90<br>(0.70,<br>1.16) | 0.89<br>(0.71,<br>1.13) | 1.11<br>(0.95,<br>1.31) | 1.01<br>(0.84,<br>1.20) | 0.92<br>(0.78,<br>1.08) | 1.01<br>(0.81,<br>1.27) | 0.96<br>(0.72,<br>1.28) | 1.05<br>(0.79,<br>1.39) | 1.14<br>(0.93,<br>1.40) | 1.00<br>(0.76,<br>1.32) | 1.05<br>(0.90,<br>1.24) | 0.83<br>(0.66,<br>1.03) | 1.00<br>(0.84,<br>1.20) | 0.91<br>(0.72,<br>1.15) | 1.07<br>(0.91,<br>1.26) | 0.96<br>(0.73,<br>1.25) | Vort                    |              |  |
| 1.65<br>(1.44,<br>1.88) | 2.13<br>(1.89,<br>2.41) | 1.58<br>(1.35,<br>1.86) | 1.52<br>(1.33,<br>1.74) | 1.49<br>(1.21,<br>1.85) | 1.49<br>(1.24,<br>1.79) | 1.85<br>(1.66,<br>2.07) | 1.68<br>(1.50,<br>1.87) | 1.52<br>(1.40,<br>1.66) | 1.69<br>(1.41,<br>2.02) | 1.59<br>(1.24,<br>2.05) | 1.74<br>(1.37,<br>2.23) | 1.89<br>(1.64,<br>2.20) | 1.67<br>(1.32,<br>2.12) | 1.75<br>(1.61,<br>1.90) | 1.37<br>(1.16,<br>1.63) | 1.67<br>(1.49,<br>1.87) | 1.51<br>(1.25,<br>1.83) | 1.78<br>(1.61,<br>1.96) | 1.60<br>(1.28,<br>2.00) | 1.66<br>(1.45,<br>1.92) | Pi<br>a<br>c |  |

OR>1 favour the treatment in the column

## 7.2.2 Dropouts for any reason

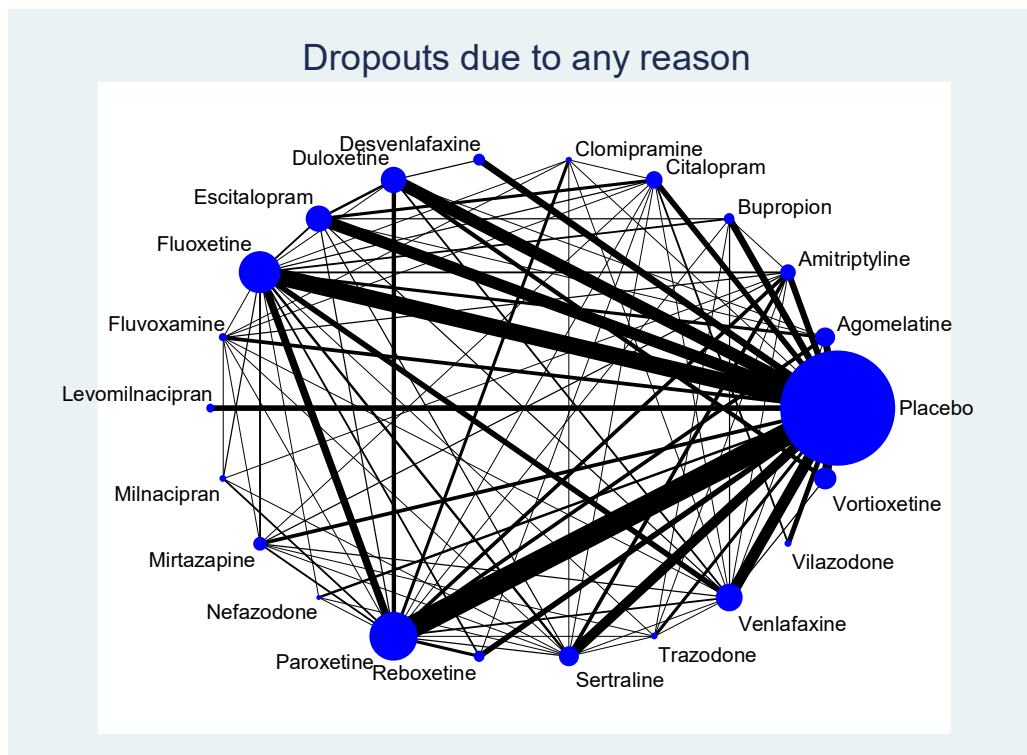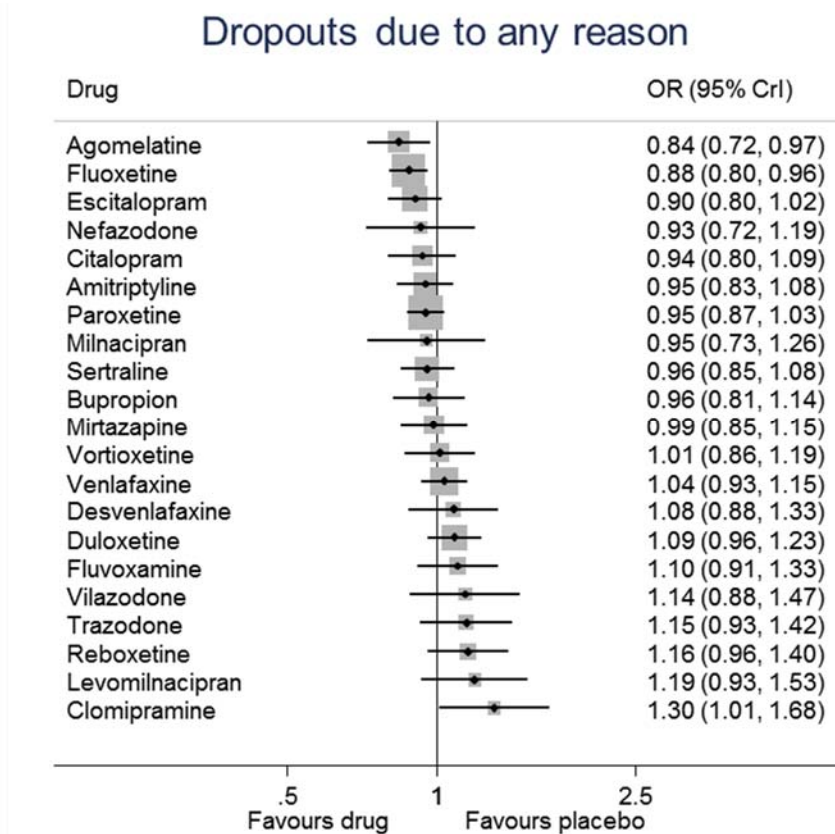

|                         |                         |                         |                         |                         |                         |                         |                         |                         |                         |                         |                         |                         |                         |                         |                         |                         |                         |                         |                         |                         |             |
|-------------------------|-------------------------|-------------------------|-------------------------|-------------------------|-------------------------|-------------------------|-------------------------|-------------------------|-------------------------|-------------------------|-------------------------|-------------------------|-------------------------|-------------------------|-------------------------|-------------------------|-------------------------|-------------------------|-------------------------|-------------------------|-------------|
| Agom                    |                         |                         |                         |                         |                         |                         |                         |                         |                         |                         |                         |                         |                         |                         |                         |                         |                         |                         |                         |                         |             |
| 0.89<br>(0.73,<br>1.07) | <b>Amit</b>             |                         |                         |                         |                         |                         |                         |                         |                         |                         |                         |                         |                         |                         |                         |                         |                         |                         |                         |                         |             |
| 0.87<br>(0.70,<br>1.09) | 0.98<br>(0.80,<br>1.21) | <b>Bupr</b>             |                         |                         |                         |                         |                         |                         |                         |                         |                         |                         |                         |                         |                         |                         |                         |                         |                         |                         |             |
| 0.90<br>(0.73,<br>1.11) | 1.01<br>(0.83,<br>1.24) | 1.03<br>(0.82,<br>1.30) | <b>Cita</b>             |                         |                         |                         |                         |                         |                         |                         |                         |                         |                         |                         |                         |                         |                         |                         |                         |                         |             |
| 0.64<br>(0.48,<br>0.86) | 0.73<br>(0.55,<br>0.96) | 0.74<br>(0.55,<br>1.00) | 0.72<br>(0.54,<br>0.96) | <b>Clom</b>             |                         |                         |                         |                         |                         |                         |                         |                         |                         |                         |                         |                         |                         |                         |                         |                         |             |
| 0.78<br>(0.60,<br>1.00) | 0.88<br>(0.69,<br>1.12) | 0.89<br>(0.68,<br>1.17) | 0.87<br>(0.67,<br>1.12) | 1.21<br>(0.87,<br>1.68) | <b>Desv</b>             |                         |                         |                         |                         |                         |                         |                         |                         |                         |                         |                         |                         |                         |                         |                         |             |
| 0.77<br>(0.64,<br>0.93) | 0.87<br>(0.73,<br>1.04) | 0.89<br>(0.72,<br>1.09) | 0.86<br>(0.71,<br>1.05) | 1.20<br>(0.91,<br>1.59) | 0.99<br>(0.79,<br>1.26) | <b>Dulo</b>             |                         |                         |                         |                         |                         |                         |                         |                         |                         |                         |                         |                         |                         |                         |             |
| 0.93<br>(0.77,<br>1.12) | 1.05<br>(0.88,<br>1.25) | 1.07<br>(0.87,<br>1.30) | 1.03<br>(0.86,<br>1.24) | 1.44<br>(1.09,<br>1.90) | 1.19<br>(0.94,<br>1.52) | 1.20<br>(1.02,<br>1.41) | <b>Esci</b>             |                         |                         |                         |                         |                         |                         |                         |                         |                         |                         |                         |                         |                         |             |
| 0.96<br>(0.81,<br>1.12) | 1.08<br>(0.94,<br>1.25) | 1.10<br>(0.92,<br>1.32) | 1.07<br>(0.90,<br>1.27) | 1.49<br>(1.15,<br>1.93) | 1.23<br>(0.98,<br>1.54) | 1.24<br>(1.07,<br>1.43) | 1.03<br>(0.89,<br>1.19) | <b>Fiuo</b>             |                         |                         |                         |                         |                         |                         |                         |                         |                         |                         |                         |                         |             |
| 0.76<br>(0.60,<br>0.96) | 0.86<br>(0.70,<br>1.07) | 0.88<br>(0.68,<br>1.08) | 0.85<br>(0.67,<br>1.08) | 1.19<br>(0.87,<br>1.62) | 0.98<br>(0.74,<br>1.30) | 0.99<br>(0.79,<br>1.23) | 0.82<br>(0.66,<br>1.02) | 0.80<br>(0.65,<br>0.97) | <b>Fluv</b>             |                         |                         |                         |                         |                         |                         |                         |                         |                         |                         |                         |             |
| 0.70<br>(0.53,<br>0.94) | 0.80<br>(0.60,<br>1.06) | 0.81<br>(0.60,<br>1.09) | 0.78<br>(0.58,<br>1.05) | 1.09<br>(0.77,<br>1.56) | 0.91<br>(0.66,<br>1.25) | 0.91<br>(0.69,<br>1.20) | 0.76<br>(0.57,<br>1.00) | 0.74<br>(0.57,<br>0.96) | 0.92<br>(0.68,<br>1.26) | <b>Levo</b>             |                         |                         |                         |                         |                         |                         |                         |                         |                         |                         |             |
| 0.88<br>(0.65,<br>1.20) | 0.99<br>(0.74,<br>1.33) | 1.01<br>(0.73,<br>1.39) | 0.98<br>(0.72,<br>1.34) | 1.37<br>(0.95,<br>1.97) | 1.13<br>(0.80,<br>1.60) | 1.14<br>(0.84,<br>1.53) | 0.95<br>(0.70,<br>1.27) | 0.92<br>(0.70,<br>1.21) | 1.15<br>(0.85,<br>1.58) | 1.25<br>(0.86,<br>1.81) | <b>Milin</b>            |                         |                         |                         |                         |                         |                         |                         |                         |                         |             |
| 0.85<br>(0.69,<br>1.05) | 0.96<br>(0.80,<br>1.16) | 0.98<br>(0.78,<br>1.22) | 0.95<br>(0.77,<br>1.17) | 1.32<br>(0.99,<br>1.76) | 1.09<br>(0.84,<br>1.42) | 1.10<br>(0.90,<br>1.34) | 0.92<br>(0.76,<br>1.11) | 0.89<br>(0.75,<br>1.05) | 1.11<br>(0.89,<br>1.40) | 1.21<br>(0.90,<br>1.62) | 0.97<br>(0.71,<br>1.32) | <b>Mirt</b>             |                         |                         |                         |                         |                         |                         |                         |                         |             |
| 0.91<br>(0.68,<br>1.21) | 1.02<br>(0.78,<br>1.35) | 1.04<br>(0.77,<br>1.41) | 1.01<br>(0.75,<br>1.35) | 1.41<br>(0.99,<br>2.01) | 1.17<br>(0.84,<br>1.61) | 1.17<br>(0.89,<br>1.55) | 0.98<br>(0.74,<br>1.29) | 0.95<br>(0.73,<br>1.23) | 1.19<br>(0.87,<br>1.62) | 1.29<br>(0.90,<br>1.83) | 1.03<br>(0.71,<br>1.49) | 1.07<br>(0.80,<br>1.43) | <b>Nefa</b>             |                         |                         |                         |                         |                         |                         |                         |             |
| 0.88<br>(0.75,<br>1.04) | 1.00<br>(0.87,<br>1.15) | 1.02<br>(0.84,<br>1.22) | 0.99<br>(0.83,<br>1.17) | 1.37<br>(1.07,<br>1.77) | 1.14<br>(0.91,<br>1.42) | 1.14<br>(0.99,<br>1.31) | 0.95<br>(0.83,<br>1.10) | 0.92<br>(0.83,<br>1.03) | 1.16<br>(0.95,<br>1.41) | 1.26<br>(0.97,<br>1.63) | 1.00<br>(0.77,<br>1.32) | 1.04<br>(0.88,<br>1.23) | 0.98<br>(0.75,<br>1.27) | <b>Paro</b>             |                         |                         |                         |                         |                         |                         |             |
| 0.73<br>(0.57,<br>0.92) | 0.82<br>(0.66,<br>1.02) | 0.83<br>(0.65,<br>1.07) | 0.81<br>(0.64,<br>1.02) | 1.13<br>(0.83,<br>1.53) | 0.93<br>(0.71,<br>1.23) | 0.94<br>(0.75,<br>1.17) | 0.78<br>(0.62,<br>0.97) | 0.76<br>(0.62,<br>0.92) | 0.95<br>(0.73,<br>1.23) | 1.03<br>(0.76,<br>1.40) | 0.82<br>(0.60,<br>1.14) | 0.85<br>(0.67,<br>1.08) | 0.80<br>(0.59,<br>1.09) | 0.82<br>(0.68,<br>1.00) | <b>Rebo</b>             |                         |                         |                         |                         |                         |             |
| 0.88<br>(0.73,<br>1.06) | 0.99<br>(0.84,<br>1.16) | 1.01<br>(0.82,<br>1.24) | 0.98<br>(0.81,<br>1.18) | 1.36<br>(1.03,<br>1.79) | 1.13<br>(0.88,<br>1.44) | 1.13<br>(0.96,<br>1.35) | 0.94<br>(0.80,<br>1.11) | 0.92<br>(0.80,<br>1.06) | 1.15<br>(0.92,<br>1.43) | 1.25<br>(0.94,<br>1.64) | 1.00<br>(0.74,<br>1.34) | 1.03<br>(0.85,<br>1.25) | 0.97<br>(0.74,<br>1.27) | 0.99<br>(0.86,<br>1.14) | 1.21<br>(0.97,<br>1.51) | <b>Sert</b>             |                         |                         |                         |                         |             |
| 0.73<br>(0.57,<br>0.94) | 0.83<br>(0.65,<br>1.05) | 0.84<br>(0.65,<br>1.09) | 0.82<br>(0.63,<br>1.06) | 1.14<br>(0.82,<br>1.58) | 0.94<br>(0.70,<br>1.27) | 0.95<br>(0.74,<br>1.21) | 0.79<br>(0.62,<br>1.00) | 0.77<br>(0.61,<br>0.95) | 0.96<br>(0.72,<br>1.27) | 1.04<br>(0.75,<br>1.44) | 0.83<br>(0.59,<br>1.17) | 0.86<br>(0.67,<br>1.10) | 0.81<br>(0.58,<br>1.12) | 0.83<br>(0.66,<br>1.03) | 1.01<br>(0.76,<br>1.33) | 0.83<br>(0.66,<br>1.06) | <b>Traz</b>             |                         |                         |                         |             |
| 0.81<br>(0.68,<br>0.96) | 0.92<br>(0.78,<br>1.07) | 0.93<br>(0.77,<br>1.13) | 0.90<br>(0.75,<br>1.09) | 1.26<br>(0.96,<br>1.65) | 1.04<br>(0.82,<br>1.32) | 1.05<br>(0.90,<br>1.22) | 0.87<br>(0.75,<br>1.02) | 0.85<br>(0.75,<br>0.96) | 1.06<br>(0.86,<br>1.31) | 1.15<br>(0.88,<br>1.51) | 0.92<br>(0.69,<br>1.23) | 0.95<br>(0.80,<br>1.14) | 0.89<br>(0.68,<br>1.17) | 0.92<br>(0.81,<br>1.04) | 1.12<br>(0.91,<br>1.38) | 0.92<br>(0.79,<br>1.08) | 1.11<br>(0.88,<br>1.40) | <b>Venl</b>             |                         |                         |             |
| 0.74<br>(0.55,<br>0.99) | 0.83<br>(0.63,<br>1.11) | 0.84<br>(0.62,<br>1.15) | 0.82<br>(0.62,<br>1.09) | 1.14<br>(0.80,<br>1.64) | 0.95<br>(0.68,<br>1.31) | 0.95<br>(0.72,<br>1.26) | 0.79<br>(0.60,<br>1.05) | 0.77<br>(0.59,<br>1.01) | 0.96<br>(0.70,<br>1.32) | 1.04<br>(0.73,<br>1.49) | 0.84<br>(0.58,<br>1.22) | 0.87<br>(0.64,<br>1.17) | 0.81<br>(0.57,<br>1.16) | 0.83<br>(0.64,<br>1.09) | 1.01<br>(0.74,<br>1.39) | 0.84<br>(0.63,<br>1.11) | 1.00<br>(0.72,<br>1.40) | 0.91<br>(0.69,<br>1.20) | <b>Vila</b>             |                         |             |
| 0.83<br>(0.67,<br>1.03) | 0.93<br>(0.76,<br>1.15) | 0.95<br>(0.75,<br>1.20) | 0.92<br>(0.74,<br>1.15) | 1.29<br>(0.95,<br>1.74) | 1.06<br>(0.82,<br>1.38) | 1.07<br>(0.89,<br>1.28) | 0.89<br>(0.73,<br>1.09) | 0.87<br>(0.72,<br>1.04) | 1.08<br>(0.85,<br>1.39) | 1.18<br>(0.87,<br>1.58) | 0.94<br>(0.68,<br>1.29) | 0.97<br>(0.78,<br>1.21) | 0.91<br>(0.68,<br>1.23) | 0.94<br>(0.78,<br>1.12) | 1.14<br>(0.89,<br>1.46) | 0.94<br>(0.77,<br>1.16) | 1.13<br>(0.87,<br>1.47) | 1.02<br>(0.85,<br>1.23) | 1.13<br>(0.83,<br>1.52) | <b>Vort</b>             |             |
| 0.84<br>(0.72,<br>0.97) | 0.95<br>(0.83,<br>1.08) | 0.96<br>(0.81,<br>1.14) | 0.94<br>(0.80,<br>1.09) | 1.30<br>(1.01,<br>1.68) | 1.08<br>(0.88,<br>1.33) | 1.09<br>(0.96,<br>1.23) | 0.90<br>(0.80,<br>1.02) | 0.88<br>(0.80,<br>0.96) | 1.10<br>(0.91,<br>1.33) | 1.19<br>(0.93,<br>1.53) | 0.95<br>(0.73,<br>1.26) | 0.99<br>(0.85,<br>1.15) | 0.93<br>(0.72,<br>1.19) | 0.95<br>(0.87,<br>1.03) | 1.16<br>(0.96,<br>1.40) | 0.96<br>(0.85,<br>1.08) | 1.15<br>(0.93,<br>1.42) | 1.04<br>(0.93,<br>1.15) | 1.14<br>(0.88,<br>1.47) | 1.01<br>(0.86,<br>1.19) | <b>Plac</b> |

OR<1 favour the treatment in the column.

### 7.2.3 Efficacy continuous

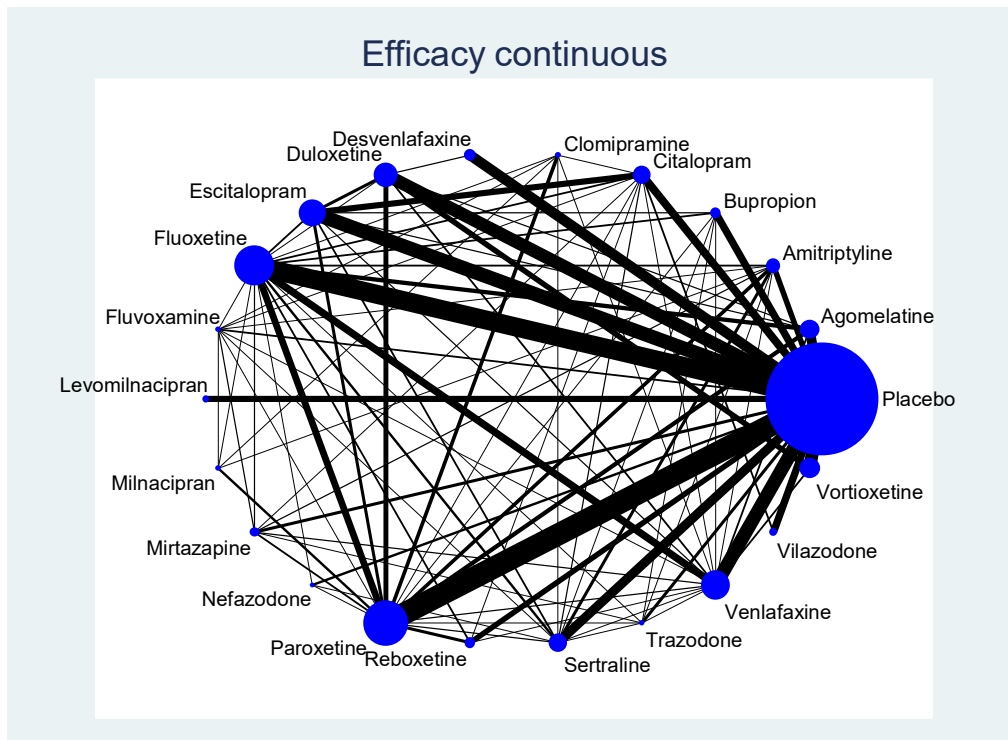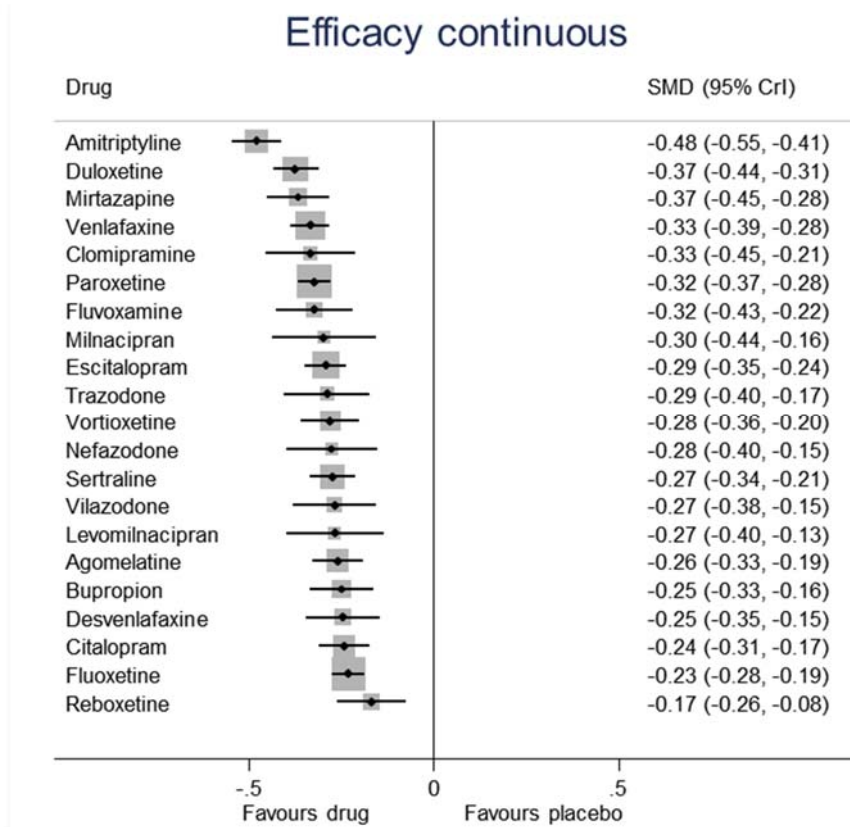





## 7.2.4 Remission

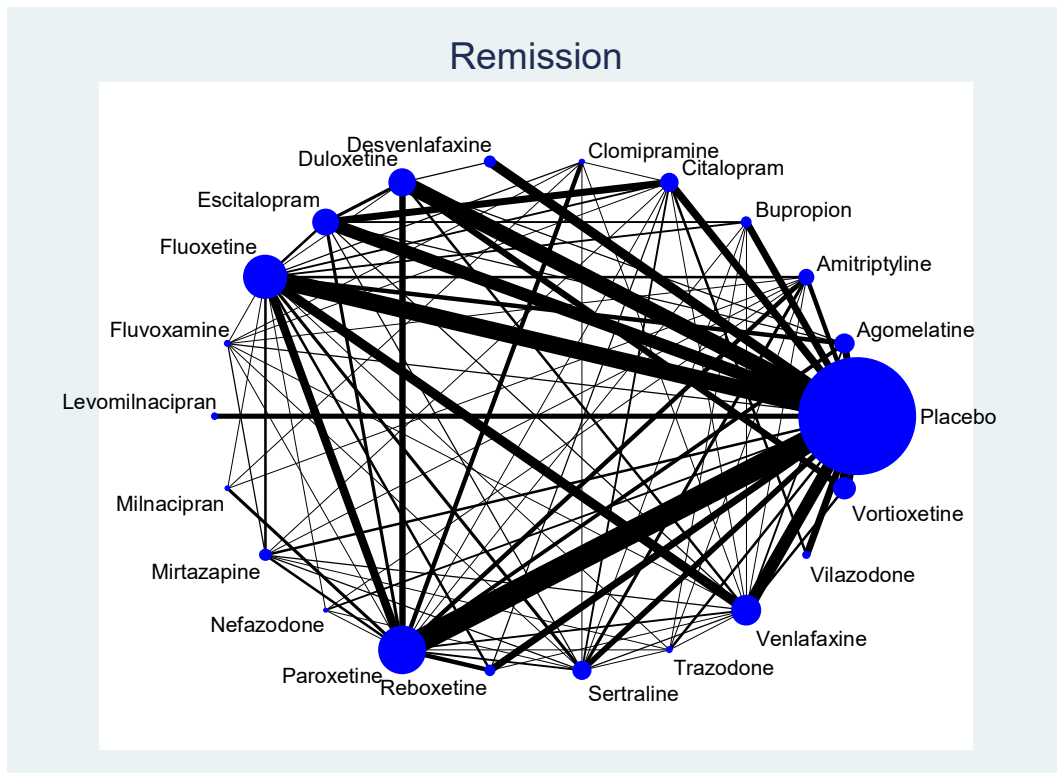

## Remission

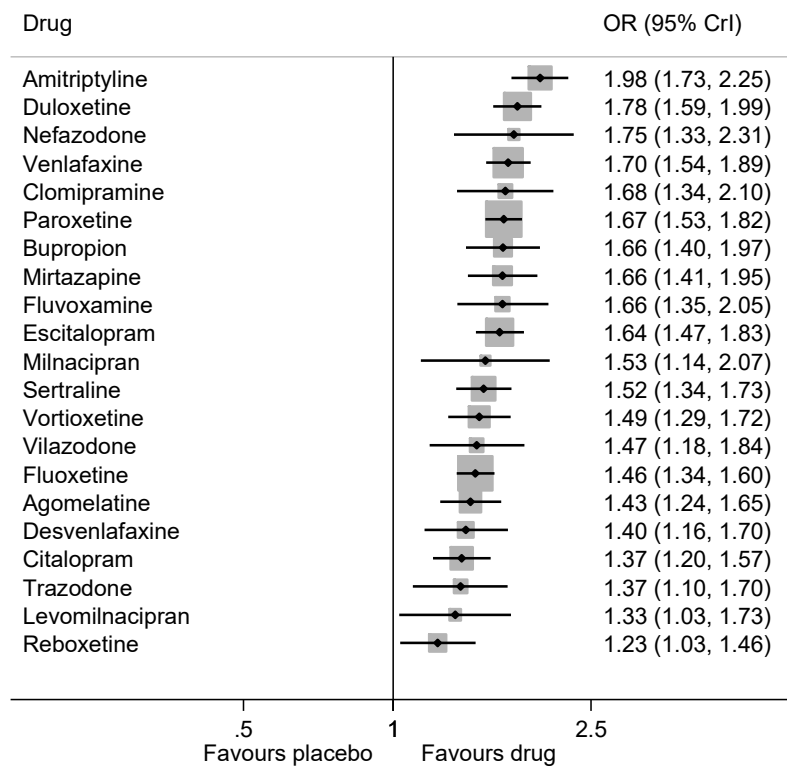

|                         |                         |                         |                         |                         |                         |                         |                         |                         |                         |                         |                         |                         |                         |                         |                         |                         |                         |                         |                         |                         |                     |  |  |  |  |
|-------------------------|-------------------------|-------------------------|-------------------------|-------------------------|-------------------------|-------------------------|-------------------------|-------------------------|-------------------------|-------------------------|-------------------------|-------------------------|-------------------------|-------------------------|-------------------------|-------------------------|-------------------------|-------------------------|-------------------------|-------------------------|---------------------|--|--|--|--|
| 0.72<br>(0.60,<br>0.87) | <b>Amit</b>             |                         |                         |                         |                         |                         |                         |                         |                         |                         |                         |                         |                         |                         |                         |                         |                         |                         |                         |                         |                     |  |  |  |  |
| 0.86<br>(0.69,<br>1.07) | 1.19<br>(0.96,<br>1.47) | <b>Bupr</b>             |                         |                         |                         |                         |                         |                         |                         |                         |                         |                         |                         |                         |                         |                         |                         |                         |                         |                         |                     |  |  |  |  |
| 1.04<br>(0.86,<br>1.26) | 1.44<br>(1.20,<br>1.72) | 1.21<br>(0.98,<br>1.50) | <b>Cita</b>             |                         |                         |                         |                         |                         |                         |                         |                         |                         |                         |                         |                         |                         |                         |                         |                         |                         |                     |  |  |  |  |
| 0.85<br>(0.66,<br>1.10) | 1.17<br>(0.92,<br>1.51) | 0.99<br>(0.75,<br>1.31) | 0.82<br>(0.64,<br>1.05) | <b>Clom</b>             |                         |                         |                         |                         |                         |                         |                         |                         |                         |                         |                         |                         |                         |                         |                         |                         |                     |  |  |  |  |
| 1.02<br>(0.81,<br>1.30) | 1.41<br>(1.12,<br>1.78) | 1.19<br>(0.92,<br>1.54) | 0.98<br>(0.77,<br>1.24) | 1.20<br>(0.89,<br>1.61) | <b>Desv</b>             |                         |                         |                         |                         |                         |                         |                         |                         |                         |                         |                         |                         |                         |                         |                         |                     |  |  |  |  |
| 0.80<br>(0.68,<br>0.96) | 1.11<br>(0.94,<br>1.31) | 0.94<br>(0.76,<br>1.14) | 0.77<br>(0.65,<br>0.91) | 0.95<br>(0.74,<br>1.21) | 0.79<br>(0.63,<br>0.98) | <b>Dulo</b>             |                         |                         |                         |                         |                         |                         |                         |                         |                         |                         |                         |                         |                         |                         |                     |  |  |  |  |
| 0.87<br>(0.74,<br>1.03) | 1.21<br>(1.02,<br>1.42) | 1.02<br>(0.84,<br>1.23) | 0.84<br>(0.73,<br>0.97) | 1.03<br>(0.80,<br>1.31) | 0.86<br>(0.68,<br>1.07) | 1.09<br>(0.94,<br>1.26) | <b>Esci</b>             |                         |                         |                         |                         |                         |                         |                         |                         |                         |                         |                         |                         |                         |                     |  |  |  |  |
| 0.98<br>(0.84,<br>1.14) | 1.35<br>(1.17,<br>1.55) | 1.14<br>(0.94,<br>1.37) | 0.94<br>(0.81,<br>1.09) | 1.15<br>(0.92,<br>1.44) | 0.96<br>(0.77,<br>1.18) | 1.21<br>(1.06,<br>1.39) | 1.12<br>(0.98,<br>1.27) | <b>Fluo</b>             |                         |                         |                         |                         |                         |                         |                         |                         |                         |                         |                         |                         |                     |  |  |  |  |
| 0.86<br>(0.67,<br>1.10) | 1.19<br>(0.95,<br>1.50) | 1.00<br>(0.77,<br>1.31) | 0.83<br>(0.65,<br>1.05) | 1.01<br>(0.75,<br>1.36) | 0.84<br>(0.63,<br>1.12) | 1.07<br>(0.85,<br>1.36) | 0.99<br>(0.78,<br>1.24) | 0.88<br>(0.71,<br>1.09) | <b>Fluv</b>             |                         |                         |                         |                         |                         |                         |                         |                         |                         |                         |                         |                     |  |  |  |  |
| 1.07<br>(0.80,<br>1.44) | 1.48<br>(1.11,<br>1.98) | 1.25<br>(0.92,<br>1.70) | 1.03<br>(0.77,<br>1.38) | 1.26<br>(0.90,<br>1.77) | 1.05<br>(0.76,<br>1.45) | 1.33<br>(1.01,<br>1.77) | 1.23<br>(0.93,<br>1.63) | 1.10<br>(0.84,<br>1.45) | 1.25<br>(0.89,<br>1.74) | <b>Levo</b>             |                         |                         |                         |                         |                         |                         |                         |                         |                         |                         |                     |  |  |  |  |
| 0.93<br>(0.68,<br>1.29) | 1.29<br>(0.95,<br>1.76) | 1.08<br>(0.77,<br>1.53) | 0.90<br>(0.65,<br>1.24) | 1.10<br>(0.78,<br>1.55) | 0.91<br>(0.64,<br>1.30) | 1.16<br>(0.85,<br>1.59) | 1.07<br>(0.78,<br>1.46) | 0.95<br>(0.71,<br>1.29) | 1.08<br>(0.76,<br>1.55) | 0.87<br>(0.59,<br>1.29) | <b>Miln</b>             |                         |                         |                         |                         |                         |                         |                         |                         |                         |                     |  |  |  |  |
| 0.86<br>(0.70,<br>1.06) | 1.19<br>(0.98,<br>1.44) | 1.00<br>(0.79,<br>1.26) | 0.83<br>(0.68,<br>1.01) | 1.01<br>(0.78,<br>1.32) | 0.84<br>(0.66,<br>1.09) | 1.07<br>(0.88,<br>1.30) | 0.99<br>(0.82,<br>1.19) | 0.88<br>(0.75,<br>1.04) | 1.00<br>(0.79,<br>1.27) | 0.80<br>(0.59,<br>1.09) | 0.92<br>(0.66,<br>1.28) | <b>Mirt</b>             |                         |                         |                         |                         |                         |                         |                         |                         |                     |  |  |  |  |
| 0.82<br>(0.60,<br>1.11) | 1.13<br>(0.84,<br>1.52) | 0.95<br>(0.69,<br>1.32) | 0.79<br>(0.58,<br>1.07) | 0.96<br>(0.68,<br>1.36) | 0.80<br>(0.57,<br>1.12) | 1.02<br>(0.76,<br>1.37) | 0.94<br>(0.70,<br>1.26) | 0.84<br>(0.63,<br>1.11) | 0.95<br>(0.67,<br>1.34) | 0.76<br>(0.52,<br>1.11) | 0.88<br>(0.59,<br>1.31) | 0.95<br>(0.69,<br>1.30) | <b>Nefa</b>             |                         |                         |                         |                         |                         |                         |                         |                     |  |  |  |  |
| 0.86<br>(0.74,<br>1.00) | 1.18<br>(1.03,<br>1.36) | 1.00<br>(0.83,<br>1.20) | 0.82<br>(0.71,<br>0.95) | 1.01<br>(0.81,<br>1.25) | 0.84<br>(0.68,<br>1.03) | 1.07<br>(0.94,<br>1.21) | 0.98<br>(0.86,<br>1.12) | 0.88<br>(0.79,<br>0.97) | 0.99<br>(0.80,<br>1.24) | 0.80<br>(0.61,<br>1.05) | 0.92<br>(0.69,<br>1.23) | 0.99<br>(0.84,<br>1.18) | 1.05<br>(0.79,<br>1.40) | <b>Paro</b>             |                         |                         |                         |                         |                         |                         |                     |  |  |  |  |
| 1.16<br>(0.93,<br>1.45) | 1.61<br>(1.30,<br>1.98) | 1.35<br>(1.06,<br>1.72) | 1.12<br>(0.91,<br>1.38) | 1.37<br>(1.04,<br>1.80) | 1.14<br>(0.88,<br>1.47) | 1.45<br>(1.18,<br>1.77) | 1.33<br>(1.09,<br>1.63) | 1.19<br>(0.99,<br>1.43) | 1.35<br>(1.03,<br>1.76) | 1.08<br>(0.79,<br>1.48) | 1.25<br>(0.89,<br>1.75) | 1.35<br>(1.07,<br>1.70) | 1.42<br>(1.03,<br>1.97) | 1.36<br>(1.13,<br>1.63) | <b>Rebo</b>             |                         |                         |                         |                         |                         |                     |  |  |  |  |
| 0.94<br>(0.78,<br>1.13) | 1.30<br>(1.11,<br>1.52) | 1.09<br>(0.89,<br>1.35) | 0.90<br>(0.76,<br>1.07) | 1.11<br>(0.87,<br>1.40) | 0.92<br>(0.73,<br>1.16) | 1.17<br>(0.99,<br>1.38) | 1.08<br>(0.92,<br>1.26) | 0.96<br>(0.84,<br>1.11) | 1.09<br>(0.87,<br>1.38) | 0.88<br>(0.66,<br>1.17) | 1.01<br>(0.73,<br>1.38) | 1.09<br>(0.90,<br>1.32) | 1.15<br>(0.85,<br>1.55) | 1.10<br>(0.95,<br>1.26) | 0.81<br>(0.66,<br>1.00) | <b>Sert</b>             |                         |                         |                         |                         |                     |  |  |  |  |
| 1.05<br>(0.81,<br>1.35) | 1.44<br>(1.14,<br>1.84) | 1.22<br>(0.93,<br>1.60) | 1.01<br>(0.78,<br>1.29) | 1.23<br>(0.91,<br>1.67) | 1.03<br>(0.77,<br>1.38) | 1.30<br>(1.02,<br>1.66) | 1.20<br>(0.94,<br>1.53) | 1.07<br>(0.85,<br>1.35) | 1.21<br>(0.90,<br>1.64) | 0.98<br>(0.69,<br>1.37) | 1.12<br>(0.78,<br>1.62) | 1.21<br>(0.93,<br>1.59) | 1.28<br>(0.90,<br>1.82) | 1.22<br>(0.97,<br>1.53) | 0.90<br>(0.68,<br>1.19) | 1.11<br>(0.87,<br>1.42) | <b>Traz</b>             |                         |                         |                         |                     |  |  |  |  |
| 0.84<br>(0.71,<br>0.99) | 1.16<br>(0.99,<br>1.35) | 0.98<br>(0.81,<br>1.18) | 0.81<br>(0.69,<br>0.94) | 0.99<br>(0.78,<br>1.25) | 0.82<br>(0.66,<br>1.02) | 1.04<br>(0.91,<br>1.20) | 0.96<br>(0.84,<br>1.11) | 0.86<br>(0.77,<br>0.96) | 0.97<br>(0.78,<br>1.22) | 0.78<br>(0.59,<br>1.03) | 0.90<br>(0.66,<br>1.22) | 0.97<br>(0.82,<br>1.16) | 1.03<br>(0.77,<br>1.38) | 0.98<br>(0.87,<br>1.10) | 0.72<br>(0.59,<br>0.88) | 0.89<br>(0.77,<br>1.04) | 0.80<br>(0.63,<br>1.01) | <b>Venl</b>             |                         |                         |                     |  |  |  |  |
| 0.97<br>(0.75,<br>1.26) | 1.34<br>(1.04,<br>1.73) | 1.13<br>(0.86,<br>1.49) | 0.93<br>(0.73,<br>1.19) | 1.14<br>(0.84,<br>1.56) | 0.95<br>(0.71,<br>1.27) | 1.21<br>(0.94,<br>1.54) | 1.11<br>(0.87,<br>1.42) | 0.99<br>(0.79,<br>1.26) | 1.13<br>(0.83,<br>1.53) | 0.90<br>(0.64,<br>1.27) | 1.04<br>(0.72,<br>1.50) | 1.13<br>(0.86,<br>1.48) | 1.19<br>(0.84,<br>1.69) | 1.13<br>(0.90,<br>1.43) | 0.83<br>(0.63,<br>1.10) | 1.03<br>(0.80,<br>1.33) | 0.93<br>(0.68,<br>1.26) | 1.16<br>(0.91,<br>1.47) | <b>Vila</b>             |                         |                     |  |  |  |  |
| 0.96<br>(0.79,<br>1.17) | 1.32<br>(1.09,<br>1.61) | 1.12<br>(0.89,<br>1.40) | 0.92<br>(0.76,<br>1.12) | 1.13<br>(0.87,<br>1.47) | 0.94<br>(0.74,<br>1.19) | 1.19<br>(1.01,<br>1.41) | 1.10<br>(0.92,<br>1.31) | 0.98<br>(0.83,<br>1.16) | 1.11<br>(0.86,<br>1.44) | 0.89<br>(0.66,<br>1.20) | 1.03<br>(0.74,<br>1.43) | 1.11<br>(0.90,<br>1.38) | 1.17<br>(0.86,<br>1.61) | 1.12<br>(0.95,<br>1.32) | 0.82<br>(0.66,<br>1.03) | 1.02<br>(0.84,<br>1.24) | 0.92<br>(0.71,<br>1.19) | 1.14<br>(0.97,<br>1.35) | 0.99<br>(0.76,<br>1.28) | <b>Vort</b>             |                     |  |  |  |  |
| 1.43<br>(1.24,<br>1.65) | 1.98<br>(1.73,<br>2.25) | 1.66<br>(1.40,<br>1.97) | 1.37<br>(1.20,<br>1.57) | 1.68<br>(1.34,<br>2.10) | 1.40<br>(1.16,<br>1.70) | 1.78<br>(1.59,<br>1.99) | 1.64<br>(1.47,<br>1.83) | 1.46<br>(1.34,<br>1.60) | 1.66<br>(1.35,<br>2.05) | 1.33<br>(1.03,<br>1.73) | 1.53<br>(1.14,<br>2.07) | 1.66<br>(1.41,<br>1.95) | 1.75<br>(1.33,<br>2.31) | 1.67<br>(1.53,<br>1.82) | 1.23<br>(1.03,<br>1.46) | 1.52<br>(1.34,<br>1.73) | 1.37<br>(1.10,<br>1.70) | 1.70<br>(1.54,<br>1.89) | 1.47<br>(1.18,<br>1.84) | 1.49<br>(1.29,<br>1.72) | <b>Place<br/>bo</b> |  |  |  |  |

OR>1 favours the treatment in the column

## 7.2.5 Dropouts due to adverse events

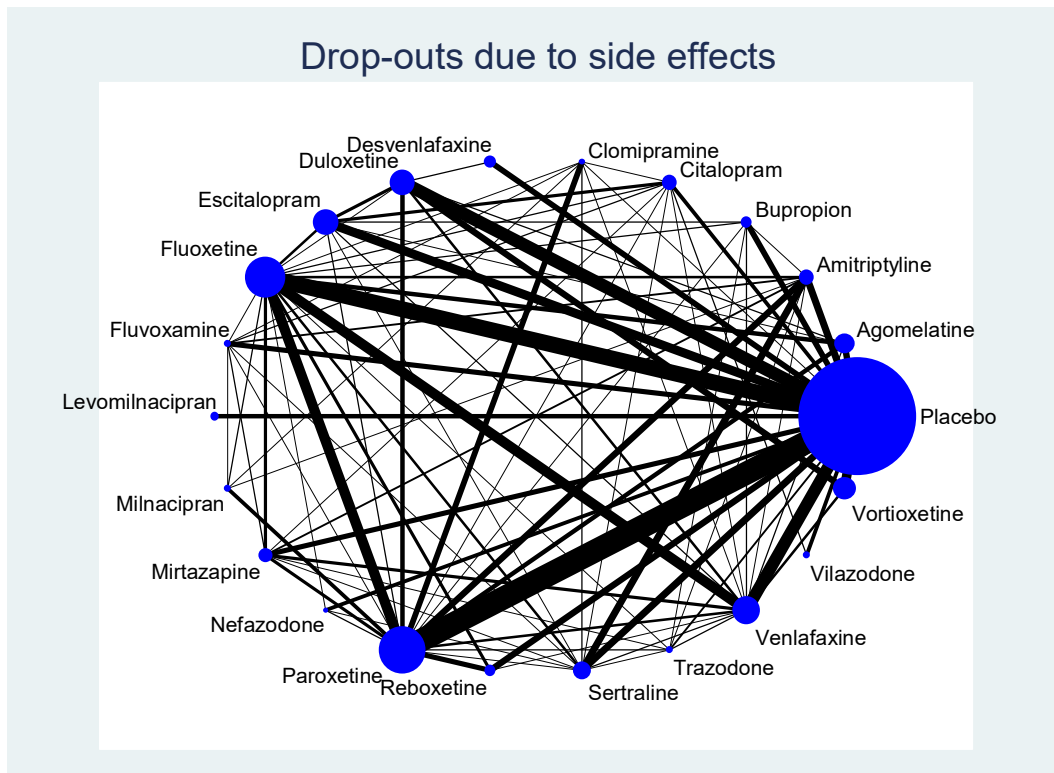

### Drop-outs due to side effects

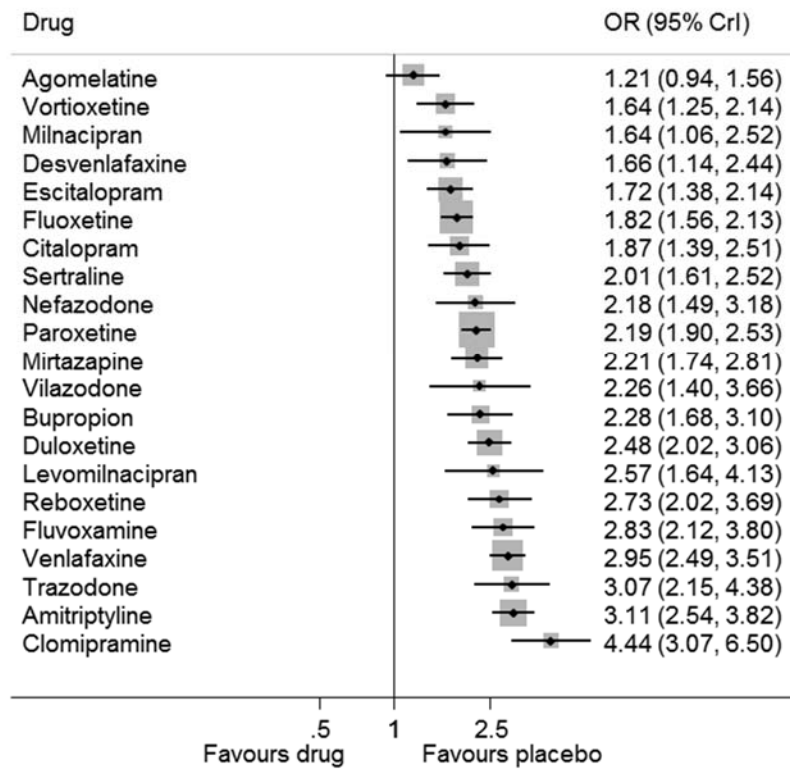

|                      |                      |                      |                      |                      |                      |                      |                      |                      |                      |                      |                      |                      |                      |                      |                      |                      |                      |                      |                      |                      |                     |  |  |  |  |  |  |  |  |
|----------------------|----------------------|----------------------|----------------------|----------------------|----------------------|----------------------|----------------------|----------------------|----------------------|----------------------|----------------------|----------------------|----------------------|----------------------|----------------------|----------------------|----------------------|----------------------|----------------------|----------------------|---------------------|--|--|--|--|--|--|--|--|
| Agom                 |                      |                      |                      |                      |                      |                      |                      |                      |                      |                      |                      |                      |                      |                      |                      |                      |                      |                      |                      |                      |                     |  |  |  |  |  |  |  |  |
| 0.39<br>(0.28, 0.53) | <b>Amit</b>          |                      |                      |                      |                      |                      |                      |                      |                      |                      |                      |                      |                      |                      |                      |                      |                      |                      |                      |                      |                     |  |  |  |  |  |  |  |  |
| 0.53<br>(0.36, 0.78) | 1.36<br>(0.95, 1.95) | <b>Bupr</b>          |                      |                      |                      |                      |                      |                      |                      |                      |                      |                      |                      |                      |                      |                      |                      |                      |                      |                      |                     |  |  |  |  |  |  |  |  |
| 0.65<br>(0.44, 0.94) | 1.66<br>(1.18, 2.36) | 1.22<br>(0.80, 1.86) | <b>Cita</b>          |                      |                      |                      |                      |                      |                      |                      |                      |                      |                      |                      |                      |                      |                      |                      |                      |                      |                     |  |  |  |  |  |  |  |  |
| 0.27<br>(0.17, 0.42) | 0.70<br>(0.46, 1.05) | 0.51<br>(0.32, 0.83) | 0.42<br>(0.26, 0.66) | <b>Clom</b>          |                      |                      |                      |                      |                      |                      |                      |                      |                      |                      |                      |                      |                      |                      |                      |                      |                     |  |  |  |  |  |  |  |  |
| 0.73<br>(0.46, 1.14) | 1.87<br>(1.22, 2.87) | 1.37<br>(0.84, 2.23) | 1.12<br>(0.69, 1.81) | 2.67<br>(1.57, 4.54) | <b>Desv</b>          |                      |                      |                      |                      |                      |                      |                      |                      |                      |                      |                      |                      |                      |                      |                      |                     |  |  |  |  |  |  |  |  |
| 0.49<br>(0.36, 0.66) | 1.25<br>(0.95, 1.66) | 0.92<br>(0.64, 1.33) | 0.75<br>(0.53, 1.07) | 1.79<br>(1.18, 2.74) | 0.67<br>(0.44, 1.02) | <b>Dulo</b>          |                      |                      |                      |                      |                      |                      |                      |                      |                      |                      |                      |                      |                      |                      |                     |  |  |  |  |  |  |  |  |
| 0.70<br>(0.51, 0.97) | 1.81<br>(1.35, 2.41) | 1.33<br>(0.92, 1.90) | 1.09<br>(0.78, 1.51) | 2.58<br>(1.69, 3.96) | 0.96<br>(0.63, 1.50) | 1.44<br>(1.09, 1.91) | <b>Esci</b>          |                      |                      |                      |                      |                      |                      |                      |                      |                      |                      |                      |                      |                      |                     |  |  |  |  |  |  |  |  |
| 0.66<br>(0.50, 0.87) | 1.70<br>(1.36, 2.14) | 1.25<br>(0.90, 1.74) | 1.02<br>(0.75, 1.40) | 2.43<br>(1.67, 3.58) | 0.91<br>(0.61, 1.37) | 1.36<br>(1.06, 1.74) | 0.94<br>(0.74, 1.21) | <b>Fluo</b>          |                      |                      |                      |                      |                      |                      |                      |                      |                      |                      |                      |                      |                     |  |  |  |  |  |  |  |  |
| 0.43<br>(0.29, 0.62) | 1.10<br>(0.79, 1.52) | 0.81<br>(0.53, 1.22) | 0.66<br>(0.45, 0.97) | 1.57<br>(1.00, 2.49) | 0.59<br>(0.37, 0.95) | 0.88<br>(0.62, 1.25) | 0.61<br>(0.43, 0.87) | 0.65<br>(0.47, 0.89) | <b>Fluv</b>          |                      |                      |                      |                      |                      |                      |                      |                      |                      |                      |                      |                     |  |  |  |  |  |  |  |  |
| 0.47<br>(0.27, 0.79) | 1.21<br>(0.72, 1.99) | 0.89<br>(0.50, 1.54) | 0.73<br>(0.42, 1.25) | 1.73<br>(0.95, 3.12) | 0.65<br>(0.35, 1.17) | 0.97<br>(0.58, 1.59) | 0.67<br>(0.40, 1.11) | 0.71<br>(0.43, 1.15) | 1.10<br>(0.63, 1.89) | <b>Levo</b>          |                      |                      |                      |                      |                      |                      |                      |                      |                      |                      |                     |  |  |  |  |  |  |  |  |
| 0.74<br>(0.45, 1.21) | 1.90<br>(1.20, 2.99) | 1.39<br>(0.82, 2.36) | 1.14<br>(0.68, 1.91) | 2.71<br>(1.61, 4.63) | 1.01<br>(0.57, 1.81) | 1.51<br>(0.95, 2.43) | 1.05<br>(0.65, 1.69) | 1.11<br>(0.72, 1.73) | 1.72<br>(1.06, 2.83) | 1.57<br>(0.84, 2.98) | <b>Milin</b>         |                      |                      |                      |                      |                      |                      |                      |                      |                      |                     |  |  |  |  |  |  |  |  |
| 0.55<br>(0.39, 0.76) | 1.41<br>(1.06, 1.87) | 1.03<br>(0.71, 1.51) | 0.84<br>(0.59, 1.21) | 2.01<br>(1.32, 3.09) | 0.75<br>(0.48, 1.18) | 1.12<br>(0.83, 1.53) | 0.78<br>(0.57, 1.06) | 0.82<br>(0.64, 1.07) | 1.28<br>(0.91, 1.81) | 1.16<br>(0.70, 1.98) | 0.74<br>(0.46, 1.19) | <b>Mirt</b>          |                      |                      |                      |                      |                      |                      |                      |                      |                     |  |  |  |  |  |  |  |  |
| 0.55<br>(0.35, 0.87) | 1.43<br>(0.94, 2.18) | 1.05<br>(0.64, 1.70) | 0.86<br>(0.53, 1.38) | 2.04<br>(1.21, 3.46) | 0.76<br>(0.45, 1.31) | 1.14<br>(0.74, 1.76) | 0.79<br>(0.51, 1.22) | 0.84<br>(0.56, 1.25) | 1.30<br>(0.81, 2.09) | 1.18<br>(0.65, 2.16) | 0.75<br>(0.43, 1.32) | 1.01<br>(0.65, 1.58) | <b>Nefa</b>          |                      |                      |                      |                      |                      |                      |                      |                     |  |  |  |  |  |  |  |  |
| 0.55<br>(0.42, 0.72) | 1.42<br>(1.15, 1.76) | 1.04<br>(0.75, 1.45) | 0.85<br>(0.62, 1.17) | 2.02<br>(1.41, 2.94) | 0.76<br>(0.51, 1.14) | 1.13<br>(0.90, 1.43) | 0.78<br>(0.61, 1.00) | 0.83<br>(0.70, 0.99) | 1.29<br>(0.95, 1.75) | 1.17<br>(0.73, 1.93) | 0.75<br>(0.49, 1.14) | 1.01<br>(0.78, 1.30) | 0.99<br>(0.67, 1.47) | <b>Paro</b>          |                      |                      |                      |                      |                      |                      |                     |  |  |  |  |  |  |  |  |
| 0.44<br>(0.30, 0.65) | 1.14<br>(0.80, 1.62) | 0.84<br>(0.55, 1.28) | 0.68<br>(0.45, 1.04) | 1.63<br>(1.03, 2.61) | 0.61<br>(0.38, 0.99) | 0.91<br>(0.64, 1.30) | 0.63<br>(0.44, 0.91) | 0.67<br>(0.49, 0.92) | 1.04<br>(0.69, 1.57) | 0.94<br>(0.55, 1.65) | 0.60<br>(0.36, 1.00) | 0.81<br>(0.56, 1.18) | 0.80<br>(0.49, 1.29) | 0.80<br>(0.59, 1.10) | <b>Rebo</b>          |                      |                      |                      |                      |                      |                     |  |  |  |  |  |  |  |  |
| 0.60<br>(0.43, 0.83) | 1.54<br>(1.19, 2.01) | 1.13<br>(0.78, 1.65) | 0.93<br>(0.65, 1.33) | 2.20<br>(1.47, 3.32) | 0.83<br>(0.53, 1.29) | 1.23<br>(0.91, 1.67) | 0.85<br>(0.63, 1.15) | 0.91<br>(0.71, 1.16) | 1.40<br>(0.99, 2.00) | 1.28<br>(0.77, 2.16) | 0.81<br>(0.50, 1.30) | 1.10<br>(0.81, 1.49) | 1.08<br>(0.71, 1.65) | 1.09<br>(0.85, 1.39) | 1.36<br>(0.94, 1.96) | <b>Sert</b>          |                      |                      |                      |                      |                     |  |  |  |  |  |  |  |  |
| 0.39<br>(0.26, 0.60) | 1.01<br>(0.69, 1.49) | 0.74<br>(0.48, 1.16) | 0.61<br>(0.39, 0.96) | 1.45<br>(0.88, 2.41) | 0.54<br>(0.32, 0.91) | 0.81<br>(0.54, 1.22) | 0.56<br>(0.37, 0.85) | 0.59<br>(0.41, 0.86) | 0.92<br>(0.59, 1.45) | 0.84<br>(0.47, 1.52) | 0.53<br>(0.31, 0.93) | 0.72<br>(0.48, 1.08) | 0.71<br>(0.42, 1.19) | 0.72<br>(0.50, 1.03) | 0.89<br>(0.56, 1.41) | 0.66<br>(0.44, 0.98) | <b>Traz</b>          |                      |                      |                      |                     |  |  |  |  |  |  |  |  |
| 0.41<br>(0.31, 0.54) | 1.05<br>(0.82, 1.35) | 0.77<br>(0.55, 1.08) | 0.63<br>(0.46, 0.88) | 1.50<br>(1.02, 2.24) | 0.56<br>(0.37, 0.85) | 0.84<br>(0.65, 1.08) | 0.58<br>(0.45, 0.75) | 0.62<br>(0.51, 0.75) | 0.96<br>(0.69, 1.33) | 0.87<br>(0.54, 1.44) | 0.56<br>(0.35, 0.87) | 0.75<br>(0.57, 0.98) | 0.74<br>(0.49, 1.11) | 0.74<br>(0.61, 0.91) | 0.92<br>(0.66, 1.29) | 0.68<br>(0.52, 0.89) | 1.04<br>(0.71, 1.52) | <b>Venl</b>          |                      |                      |                     |  |  |  |  |  |  |  |  |
| 0.53<br>(0.31, 0.92) | 1.38<br>(0.82, 2.31) | 1.01<br>(0.57, 1.78) | 0.83<br>(0.49, 1.40) | 1.96<br>(1.07, 3.61) | 0.74<br>(0.40, 1.35) | 1.10<br>(0.65, 1.85) | 0.76<br>(0.45, 1.28) | 0.81<br>(0.49, 1.33) | 1.25<br>(0.71, 2.18) | 1.14<br>(0.59, 2.23) | 0.73<br>(0.38, 1.38) | 0.98<br>(0.57, 1.66) | 0.96<br>(0.52, 1.77) | 0.97<br>(0.59, 1.59) | 1.21<br>(0.69, 2.11) | 0.89<br>(0.52, 1.51) | 1.36<br>(0.75, 2.46) | 1.31<br>(0.79, 2.17) | <b>Vila</b>          |                      |                     |  |  |  |  |  |  |  |  |
| 0.74<br>(0.51, 1.06) | 1.90<br>(1.36, 2.67) | 1.39<br>(0.93, 2.10) | 1.14<br>(0.77, 1.70) | 2.71<br>(1.72, 4.33) | 1.02<br>(0.64, 1.62) | 1.52<br>(1.13, 2.05) | 1.05<br>(0.75, 1.48) | 1.12<br>(0.82, 1.52) | 1.73<br>(1.17, 2.58) | 1.57<br>(0.93, 2.72) | 1.00<br>(0.60, 1.66) | 1.35<br>(0.94, 1.93) | 1.33<br>(0.83, 2.12) | 1.34<br>(1.00, 1.81) | 1.67<br>(1.12, 2.50) | 1.23<br>(0.87, 1.75) | 1.88<br>(1.20, 2.94) | 1.81<br>(1.33, 2.45) | 1.38<br>(0.80, 2.40) | <b>Vort</b>          |                     |  |  |  |  |  |  |  |  |
| 1.21<br>(0.94, 1.56) | 3.11<br>(2.54, 3.82) | 2.28<br>(1.68, 3.10) | 1.87<br>(1.39, 2.51) | 4.44<br>(3.07, 6.50) | 1.66<br>(1.14, 2.44) | 2.48<br>(2.02, 3.06) | 1.72<br>(1.38, 2.14) | 1.82<br>(1.56, 2.13) | 2.83<br>(2.12, 3.80) | 2.57<br>(1.64, 4.13) | 1.64<br>(1.06, 2.52) | 2.21<br>(1.74, 2.81) | 2.18<br>(1.49, 3.18) | 2.19<br>(1.90, 2.53) | 2.73<br>(2.02, 3.69) | 2.01<br>(1.61, 2.52) | 3.07<br>(2.15, 4.38) | 2.95<br>(2.49, 3.51) | 2.26<br>(1.40, 3.66) | 1.64<br>(1.25, 2.14) | <b>Place<br/>bo</b> |  |  |  |  |  |  |  |  |

Values<1 favour the treatment in the column

### 7.3 Assessment of transitivity

The following characteristics have been evaluated in all trials included in the network irrespectively of the outcome being reported.

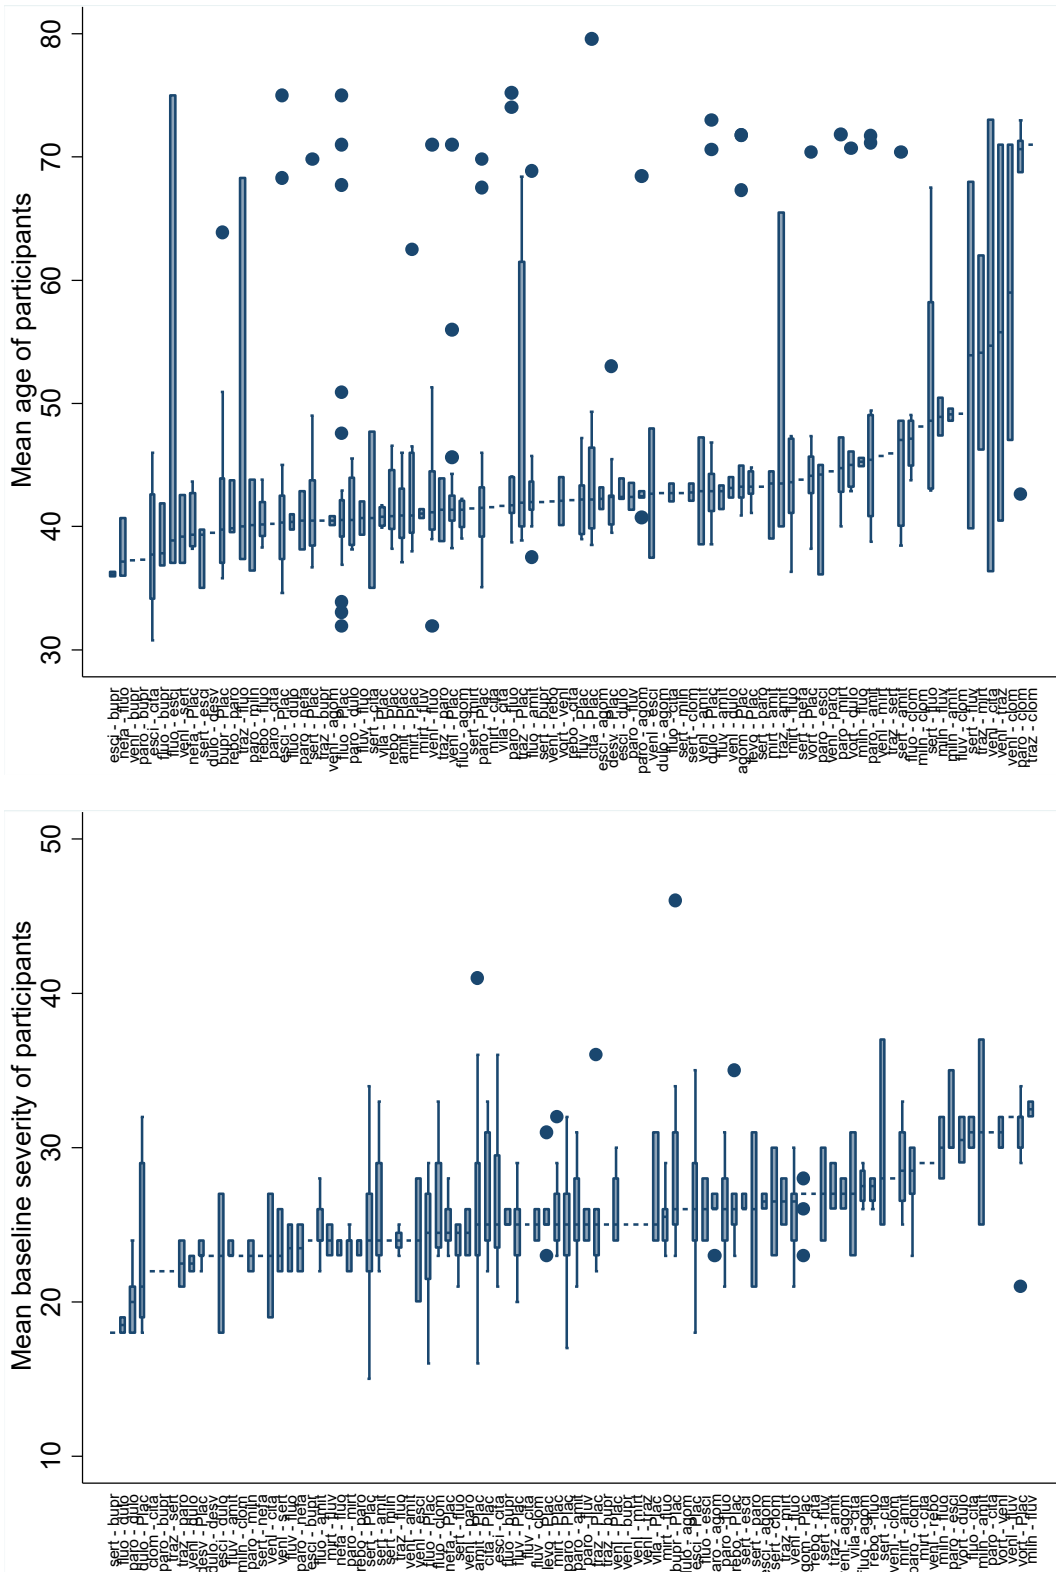

Most of the comparisons had similar mean age and baseline severity but there were a few comparisons which had relatively low or high age or baseline severity means. Meta-regressions of mean age and subgroup analyses by baseline severity, however, did not show that they impacted on the network estimates, although results from such analyses might suffer from ecological bias.

## 7.4 Evaluation of inconsistency

### 7.4.1 Response

#### 7.4.1.1 Loop-specific approach

Loops With Evidence of Statistical Inconsistency:

| Loop           | IF    | seIF  | z_value | p_value | CI_95        | Loop_Heterog_tau2 |
|----------------|-------|-------|---------|---------|--------------|-------------------|
| cita-fluv-venl | 1.243 | 0.599 | 2.077   | 0.038   | (0.07, 2.42) | 0.000             |
| clom-fluo-traz | 1.161 | 0.524 | 2.215   | 0.027   | (0.13, 2.19) | 0.000             |
| cita-clom-fluo | 1.031 | 0.470 | 2.192   | 0.028   | (0.11, 1.95) | 0.000             |
| Plac-fluv-venl | 0.992 | 0.457 | 2.168   | 0.030   | (0.10, 1.89) | 0.010             |
| agom-paro-venl | 0.912 | 0.310 | 2.943   | 0.003   | (0.30, 1.52) | 0.021             |
| clom-fluo-sert | 0.801 | 0.356 | 2.249   | 0.025   | (0.10, 1.50) | 0.000             |
| mirt-paro-venl | 0.795 | 0.345 | 2.301   | 0.021   | (0.12, 1.47) | 0.033             |
| cita-fluo-venl | 0.739 | 0.370 | 1.999   | 0.046   | (0.01, 1.46) | 0.008             |
| agom-dulo-venl | 0.690 | 0.319 | 2.160   | 0.031   | (0.06, 1.32) | 0.000             |
| dulo-venl-vort | 0.601 | 0.265 | 2.268   | 0.023   | (0.08, 1.12) | 0.015             |
| Plac-amit-fluo | 0.561 | 0.213 | 2.628   | 0.009   | (0.14, 0.98) | 0.075             |
| bupr-fluo-venl | 0.546 | 0.272 | 2.010   | 0.044   | (0.01, 1.08) | 0.000             |
| amit-fluo-sert | 0.525 | 0.220 | 2.383   | 0.017   | (0.09, 0.96) | 0.000             |
| agom-fluo-venl | 0.478 | 0.229 | 2.087   | 0.037   | (0.03, 0.93) | 0.000             |
| Plac-dulo-esci | 0.463 | 0.193 | 2.405   | 0.016   | (0.09, 0.84) | 0.035             |
| Plac-amit-paro | 0.388 | 0.155 | 2.498   | 0.012   | (0.08, 0.69) | 0.021             |
| Plac-cita-esci | 0.357 | 0.142 | 2.520   | 0.012   | (0.08, 0.63) | 0.010             |

Loops Without Evidence of Statistical Inconsistency:

| Loop                | IF    | seIF  | z_value | p_value | CI_95        | Loop_Heterog_tau2 |
|---------------------|-------|-------|---------|---------|--------------|-------------------|
| cita-clom-venl      | 1.891 | 1.255 | 1.507   | 0.132   | (0.00, 4.35) | 0.492             |
| bupr-sert-traz      | 1.385 | 1.151 | 1.203   | 0.229   | (0.00, 3.64) | 0.000             |
| fluo-miln-sert      | 1.242 | 0.964 | 1.288   | 0.198   | (0.00, 3.13) | 0.019             |
| clom-fluo-fluv      | 1.149 | 0.613 | 1.873   | 0.061   | (0.00, 2.35) | 0.000             |
| cita-sert-venl      | 1.118 | 0.892 | 1.253   | 0.210   | (0.00, 2.87) | 0.284             |
| clom-fluv-sert      | 1.102 | 0.650 | 1.695   | 0.090   | (0.00, 2.38) | 0.000             |
| bupr-fluo-traz      | 1.090 | 0.595 | 1.833   | 0.067   | (0.00, 2.26) | 0.047             |
| fluv-mirt-venl      | 1.037 | 0.749 | 1.385   | 0.166   | (0.00, 2.50) | 0.126             |
| cita-clom-paro      | 1.001 | 0.810 | 1.236   | 0.216   | (0.00, 2.59) | 0.137             |
| amit-fluv-venl      | 0.933 | 0.985 | 0.948   | 0.343   | (0.00, 2.86) | 0.237             |
| cita-paro-venl      | 0.916 | 0.923 | 0.992   | 0.321   | (0.00, 2.73) | 0.206             |
| Plac-bupr-traz      | 0.892 | 0.580 | 1.538   | 0.124   | (0.00, 2.03) | 0.094             |
| miln-paro-sert      | 0.872 | 0.939 | 0.928   | 0.353   | (0.00, 2.71) | 0.000             |
| cita-clom-mirt-traz | 0.774 | 0.691 | 1.119   | 0.263   | (0.00, 2.13) | 0.000             |
| fluo-fluv-sert      | 0.755 | 0.407 | 1.856   | 0.063   | (0.00, 1.55) | 0.000             |
| fluo-sert-traz      | 0.750 | 0.525 | 1.430   | 0.153   | (0.00, 1.78) | 0.014             |
| clom-traz-venl      | 0.737 | 0.588 | 1.254   | 0.210   | (0.00, 1.89) | 0.000             |
| cita-fluv-sert      | 0.736 | 0.928 | 0.793   | 0.428   | (0.00, 2.55) | 0.213             |
| fluo-fluv-miln      | 0.719 | 0.432 | 1.665   | 0.096   | (0.00, 1.57) | 0.010             |
| cita-esci-venl      | 0.706 | 0.498 | 1.418   | 0.156   | (0.00, 1.68) | 0.077             |
| fluo-fluv-venl      | 0.701 | 0.491 | 1.429   | 0.153   | (0.00, 1.66) | 0.000             |
| Plac-cita-venl      | 0.700 | 0.359 | 1.950   | 0.051   | (0.00, 1.40) | 0.026             |
| paro-rebo-venl      | 0.671 | 0.367 | 1.829   | 0.067   | (0.00, 1.39) | 0.000             |
| fluv-paro-sert      | 0.670 | 0.467 | 1.435   | 0.151   | (0.00, 1.58) | 0.000             |
| agom-dulo-esci      | 0.646 | 0.406 | 1.591   | 0.112   | (0.00, 1.44) | 0.031             |

|       |                |       |       |       |       |             |       |
|-------|----------------|-------|-------|-------|-------|-------------|-------|
|       | esci-paro-venl | 0.645 | 0.340 | 1.899 | 0.058 | (0.00,1.31) | 0.027 |
|       | fluo-paro-traz | 0.643 | 0.452 | 1.422 | 0.155 | (0.00,1.53) | 0.056 |
|       | clom-miln-sert | 0.641 | 1.026 | 0.624 | 0.532 | (0.00,2.65) | 0.000 |
|       | Plac-paro-traz | 0.620 | 0.320 | 1.936 | 0.053 | (0.00,1.25) | 0.023 |
|       | amit-miln-sert | 0.616 | 1.090 | 0.565 | 0.572 | (0.00,2.75) | 0.096 |
|       | clom-fluv-paro | 0.616 | 0.733 | 0.840 | 0.401 | (0.00,2.05) | 0.086 |
|       | fluv-mirt-sert | 0.615 | 0.799 | 0.769 | 0.442 | (0.00,2.18) | 0.225 |
|       | bupr-paro-venl | 0.606 | 0.502 | 1.207 | 0.227 | (0.00,1.59) | 0.023 |
|       | cita-esci-paro | 0.597 | 0.347 | 1.720 | 0.086 | (0.00,1.28) | 0.026 |
|       | cita-fluo-mirt | 0.594 | 0.509 | 1.167 | 0.243 | (0.00,1.59) | 0.040 |
|       | amit-fluv-miln | 0.587 | 0.881 | 0.666 | 0.505 | (0.00,2.31) | 0.308 |
|       | amit-paro-venl | 0.582 | 0.419 | 1.390 | 0.164 | (0.00,1.40) | 0.071 |
|       | amit-sert-traz | 0.568 | 0.529 | 1.073 | 0.283 | (0.00,1.61) | 0.043 |
|       | nefa-paro-sert | 0.546 | 0.566 | 0.964 | 0.335 | (0.00,1.65) | 0.039 |
| amit- | clom-miln-traz | 0.517 | 0.928 | 0.557 | 0.578 | (0.00,2.34) | 0.143 |
|       | Plac-cita-rebo | 0.502 | 0.414 | 1.213 | 0.225 | (0.00,1.31) | 0.068 |
|       | esci-sert-venl | 0.496 | 0.399 | 1.243 | 0.214 | (0.00,1.28) | 0.032 |
|       | Plac-sert-traz | 0.488 | 0.523 | 0.931 | 0.352 | (0.00,1.51) | 0.054 |
|       | cita-mirt-sert | 0.487 | 1.388 | 0.351 | 0.726 | (0.00,3.21) | 0.463 |
|       | bupr-fluo-sert | 0.478 | 1.034 | 0.462 | 0.644 | (0.00,2.51) | 0.000 |
|       | fluo-nefa-sert | 0.470 | 0.464 | 1.013 | 0.311 | (0.00,1.38) | 0.000 |
|       | clom-fluo-paro | 0.457 | 0.333 | 1.371 | 0.170 | (0.00,1.11) | 0.055 |
|       | fluo-rebo-venl | 0.452 | 0.352 | 1.283 | 0.199 | (0.00,1.14) | 0.000 |
|       | cita-clom-sert | 0.448 | 0.886 | 0.506 | 0.613 | (0.00,2.18) | 0.159 |
|       | fluv-miln-paro | 0.446 | 0.429 | 1.041 | 0.298 | (0.00,1.29) | 0.000 |
|       | Plac-agom-venl | 0.441 | 0.265 | 1.666 | 0.096 | (0.00,0.96) | 0.038 |
|       | fluo-traz-venl | 0.438 | 0.379 | 1.155 | 0.248 | (0.00,1.18) | 0.000 |
|       | Plac-traz-venl | 0.436 | 0.362 | 1.202 | 0.229 | (0.00,1.15) | 0.045 |
|       | Plac-cita-mirt | 0.435 | 0.405 | 1.074 | 0.283 | (0.00,1.23) | 0.014 |
| clom- | fluv-mirt-traz | 0.409 | 0.906 | 0.451 | 0.652 | (0.00,2.18) | 0.120 |
|       | cita-fluo-paro | 0.406 | 0.411 | 0.987 | 0.324 | (0.00,1.21) | 0.047 |
|       | Plac-cita-fluv | 0.403 | 0.331 | 1.217 | 0.224 | (0.00,1.05) | 0.000 |
|       | Plac-esci-venl | 0.401 | 0.238 | 1.685 | 0.092 | (0.00,0.87) | 0.016 |
|       | bupr-sert-venl | 0.391 | 1.057 | 0.370 | 0.712 | (0.00,2.46) | 0.000 |
|       | Plac-cita-paro | 0.388 | 0.280 | 1.389 | 0.165 | (0.00,0.94) | 0.010 |
| amit- | clom-miln-venl | 0.383 | 0.841 | 0.455 | 0.649 | (0.00,2.03) | 0.122 |
|       | amit-traz-venl | 0.378 | 0.428 | 0.884 | 0.377 | (0.00,1.22) | 0.000 |
|       | Plac-mirt-traz | 0.374 | 0.423 | 0.882 | 0.378 | (0.00,1.20) | 0.087 |
|       | dulo-paro-venl | 0.372 | 0.297 | 1.250 | 0.211 | (0.00,0.95) | 0.029 |
|       | Plac-bupr-venl | 0.369 | 0.324 | 1.140 | 0.254 | (0.00,1.00) | 0.040 |
|       | cita-fluo-rebo | 0.367 | 0.307 | 1.193 | 0.233 | (0.00,0.97) | 0.000 |
|       | amit-fluo-traz | 0.363 | 0.380 | 0.957 | 0.339 | (0.00,1.11) | 0.000 |
|       | agom-esci-paro | 0.363 | 0.305 | 1.188 | 0.235 | (0.00,0.96) | 0.019 |
|       | Plac-fluv-paro | 0.362 | 0.335 | 1.079 | 0.281 | (0.00,1.02) | 0.004 |
|       | Plac-paro-venl | 0.361 | 0.189 | 1.912 | 0.056 | (0.00,0.73) | 0.010 |
|       | mirt-traz-venl | 0.353 | 0.388 | 0.909 | 0.363 | (0.00,1.11) | 0.000 |
|       | amit-paro-traz | 0.351 | 0.445 | 0.790 | 0.430 | (0.00,1.22) | 0.067 |
|       | cita-fluv-paro | 0.340 | 0.490 | 0.695 | 0.487 | (0.00,1.30) | 0.000 |
|       | cita-paro-sert | 0.340 | 0.797 | 0.427 | 0.669 | (0.00,1.90) | 0.144 |
|       | Plac-amit-mirt | 0.338 | 0.290 | 1.165 | 0.244 | (0.00,0.91) | 0.048 |
|       | Plac-amit-sert | 0.329 | 0.178 | 1.850 | 0.064 | (0.00,0.68) | 0.020 |
|       | Plac-fluo-fluv | 0.324 | 0.375 | 0.865 | 0.387 | (0.00,1.06) | 0.089 |
|       | Plac-mirt-venl | 0.324 | 0.246 | 1.319 | 0.187 | (0.00,0.81) | 0.020 |
|       | fluo-sert-venl | 0.323 | 0.239 | 1.347 | 0.178 | (0.00,0.79) | 0.000 |
|       | cita-esci-sert | 0.321 | 0.419 | 0.766 | 0.444 | (0.00,1.14) | 0.067 |
|       | amit-paro-sert | 0.319 | 0.336 | 0.951 | 0.342 | (0.00,0.98) | 0.071 |
|       | agom-esci-fluo | 0.313 | 0.284 | 1.102 | 0.270 | (0.00,0.87) | 0.000 |
|       | Plac-nefa-paro | 0.309 | 0.316 | 0.979 | 0.328 | (0.00,0.93) | 0.013 |
|       | Plac-dulo-vort | 0.308 | 0.176 | 1.747 | 0.081 | (0.00,0.65) | 0.052 |
|       | cita-fluv-mirt | 0.306 | 0.508 | 0.602 | 0.547 | (0.00,1.30) | 0.000 |
|       | amit-fluo-venl | 0.304 | 0.309 | 0.982 | 0.326 | (0.00,0.91) | 0.000 |
|       | clom-sert-venl | 0.293 | 0.429 | 0.684 | 0.494 | (0.00,1.13) | 0.000 |
|       | fluo-mirt-traz | 0.291 | 0.480 | 0.607 | 0.544 | (0.00,1.23) | 0.057 |
|       | fluo-mirt-venl | 0.289 | 0.231 | 1.250 | 0.211 | (0.00,0.74) | 0.000 |
| Plac- | clom-fluv-traz | 0.287 | 0.768 | 0.374 | 0.708 | (0.00,1.79) | 0.050 |
| amit- | clom-fluv-traz | 0.285 | 0.935 | 0.305 | 0.760 | (0.00,2.12) | 0.120 |
|       | amit-fluv-sert | 0.276 | 0.540 | 0.511 | 0.610 | (0.00,1.34) | 0.092 |
|       | cita-fluo-sert | 0.275 | 0.365 | 0.754 | 0.451 | (0.00,0.99) | 0.029 |
|       | fluo-mirt-paro | 0.269 | 0.278 | 0.967 | 0.333 | (0.00,0.81) | 0.059 |
|       | Plac-fluv-mirt | 0.268 | 0.309 | 0.867 | 0.386 | (0.00,0.87) | 0.033 |
|       | Plac-rebo-venl | 0.266 | 0.452 | 0.587 | 0.557 | (0.00,1.15) | 0.062 |
|       | fluo-nefa-paro | 0.264 | 0.482 | 0.548 | 0.584 | (0.00,1.21) | 0.048 |
|       | bupr-esci-fluo | 0.264 | 0.273 | 0.966 | 0.334 | (0.00,0.80) | 0.000 |
|       | clom-fluv-venl | 0.262 | 0.727 | 0.360 | 0.719 | (0.00,1.69) | 0.000 |
|       | fluo-paro-venl | 0.252 | 0.215 | 1.169 | 0.242 | (0.00,0.67) | 0.014 |
|       | Plac-fluo-sert | 0.249 | 0.207 | 1.200 | 0.230 | (0.00,0.66) | 0.074 |
|       | esci-fluo-venl | 0.246 | 0.261 | 0.939 | 0.348 | (0.00,0.76) | 0.000 |

|                     |       |       |       |       |              |       |
|---------------------|-------|-------|-------|-------|--------------|-------|
| fluv-miln-sert      | 0.243 | 1.002 | 0.243 | 0.808 | (0.00, 2.21) | 0.000 |
| amit-mirt-sert      | 0.241 | 0.452 | 0.533 | 0.594 | (0.00, 1.13) | 0.065 |
| bupr-fluo-paro      | 0.234 | 0.456 | 0.513 | 0.608 | (0.00, 1.13) | 0.044 |
| Plac-fluo-rebo      | 0.227 | 0.297 | 0.767 | 0.443 | (0.00, 0.81) | 0.112 |
| dulo-esci-fluo      | 0.225 | 0.369 | 0.609 | 0.542 | (0.00, 0.95) | 0.011 |
| clom-fluo-miln      | 0.219 | 0.492 | 0.444 | 0.657 | (0.00, 1.18) | 0.000 |
| clom-fluv-miln      | 0.218 | 0.707 | 0.308 | 0.758 | (0.00, 1.60) | 0.000 |
| amit-fluo-mirt      | 0.212 | 0.296 | 0.716 | 0.474 | (0.00, 0.79) | 0.008 |
| fluo-paro-sert      | 0.210 | 0.287 | 0.732 | 0.464 | (0.00, 0.77) | 0.034 |
| amit-mirt-traz      | 0.207 | 0.386 | 0.536 | 0.592 | (0.00, 0.96) | 0.001 |
| Plac-amit-venl      | 0.204 | 0.298 | 0.684 | 0.494 | (0.00, 0.79) | 0.018 |
| Plac-fluv-sert      | 0.200 | 0.346 | 0.579 | 0.563 | (0.00, 0.88) | 0.008 |
| Plac-dulo-paro      | 0.196 | 0.143 | 1.370 | 0.171 | (0.00, 0.48) | 0.029 |
| Plac-bupr-fluo      | 0.188 | 0.289 | 0.651 | 0.515 | (0.00, 0.75) | 0.103 |
| clom-fluo-venl      | 0.186 | 0.375 | 0.496 | 0.620 | (0.00, 0.92) | 0.000 |
| bupr-paro-traz      | 0.185 | 0.558 | 0.332 | 0.740 | (0.00, 1.28) | 0.000 |
| fluo-miln-paro      | 0.183 | 0.339 | 0.540 | 0.589 | (0.00, 0.85) | 0.049 |
| amit-mirt-venl      | 0.182 | 0.380 | 0.479 | 0.632 | (0.00, 0.93) | 0.002 |
| clom-paro-sert      | 0.180 | 0.483 | 0.373 | 0.709 | (0.00, 1.13) | 0.069 |
| Plac-dulo-venl      | 0.179 | 0.223 | 0.801 | 0.423 | (0.00, 0.62) | 0.036 |
| cita-fluo-fluv      | 0.169 | 0.417 | 0.405 | 0.685 | (0.00, 0.99) | 0.000 |
| dulo-fluo-paro      | 0.168 | 0.368 | 0.457 | 0.648 | (0.00, 0.89) | 0.047 |
| Plac-amit-fluv      | 0.167 | 0.295 | 0.564 | 0.572 | (0.00, 0.75) | 0.021 |
| fluo-fluv-mirt      | 0.161 | 0.507 | 0.319 | 0.750 | (0.00, 1.15) | 0.098 |
| Plac-amit-traz      | 0.161 | 0.333 | 0.482 | 0.630 | (0.00, 0.81) | 0.057 |
| Plac-venl-vort      | 0.155 | 0.259 | 0.597 | 0.551 | (0.00, 0.66) | 0.057 |
| Plac-fluo-nefa      | 0.153 | 0.415 | 0.369 | 0.712 | (0.00, 0.97) | 0.095 |
| bupr-esci-sert      | 0.152 | 1.158 | 0.132 | 0.895 | (0.00, 2.42) | 0.044 |
| dulo-esci-paro      | 0.152 | 0.270 | 0.562 | 0.574 | (0.00, 0.68) | 0.041 |
| Plac-bupr-paro      | 0.142 | 0.391 | 0.363 | 0.717 | (0.00, 0.91) | 0.025 |
| agom-dulo-paro      | 0.141 | 0.347 | 0.406 | 0.684 | (0.00, 0.82) | 0.041 |
| Plac-agom-esci      | 0.134 | 0.275 | 0.487 | 0.626 | (0.00, 0.67) | 0.031 |
| bupr-traz-venl      | 0.133 | 0.498 | 0.268 | 0.789 | (0.00, 1.11) | 0.000 |
| dulo-esci-venl      | 0.133 | 0.343 | 0.387 | 0.699 | (0.00, 0.81) | 0.031 |
| Plac-esci-fluo      | 0.130 | 0.231 | 0.564 | 0.573 | (0.00, 0.58) | 0.051 |
| Plac-mirt-sert      | 0.129 | 0.324 | 0.398 | 0.691 | (0.00, 0.76) | 0.028 |
| mirt-paro-sert      | 0.127 | 0.456 | 0.278 | 0.781 | (0.00, 1.02) | 0.049 |
| cita-esci-fluo      | 0.124 | 0.273 | 0.455 | 0.649 | (0.00, 0.66) | 0.016 |
| Plac-paro-sert      | 0.122 | 0.220 | 0.554 | 0.580 | (0.00, 0.55) | 0.014 |
| mirt-paro-traz      | 0.120 | 0.413 | 0.291 | 0.771 | (0.00, 0.93) | 0.023 |
| cita-mirt-venl      | 0.120 | 1.096 | 0.109 | 0.913 | (0.00, 2.27) | 0.206 |
| dulo-fluo-venl      | 0.119 | 0.334 | 0.358 | 0.721 | (0.00, 0.77) | 0.000 |
| Plac-esci-paro      | 0.119 | 0.159 | 0.748 | 0.455 | (0.00, 0.43) | 0.011 |
| agom-fluo-paro      | 0.118 | 0.221 | 0.533 | 0.594 | (0.00, 0.55) | 0.040 |
| cita-rebo-venl      | 0.107 | 0.485 | 0.221 | 0.825 | (0.00, 1.06) | 0.000 |
| Plac-fluo-paro      | 0.105 | 0.145 | 0.724 | 0.469 | (0.00, 0.39) | 0.057 |
| amit-fluv-mirt      | 0.102 | 0.707 | 0.144 | 0.885 | (0.00, 1.49) | 0.276 |
| fluo-fluv-paro      | 0.102 | 0.451 | 0.225 | 0.822 | (0.00, 0.99) | 0.039 |
| fluv-mirt-paro      | 0.099 | 0.566 | 0.175 | 0.861 | (0.00, 1.21) | 0.121 |
| Plac-cita-vila      | 0.099 | 0.230 | 0.429 | 0.668 | (0.00, 0.55) | 0.023 |
| Plac-agom-paro      | 0.097 | 0.163 | 0.595 | 0.552 | (0.00, 0.42) | 0.031 |
| Plac-fluo-mirt      | 0.097 | 0.267 | 0.362 | 0.717 | (0.00, 0.62) | 0.099 |
| clom-paro-venl      | 0.092 | 0.503 | 0.184 | 0.854 | (0.00, 1.08) | 0.081 |
| Plac-desv-dulo      | 0.092 | 0.291 | 0.317 | 0.752 | (0.00, 0.66) | 0.031 |
| esci-fluo-sert      | 0.090 | 0.266 | 0.338 | 0.735 | (0.00, 0.61) | 0.000 |
| agom-dulo-fluo      | 0.090 | 0.391 | 0.229 | 0.819 | (0.00, 0.86) | 0.008 |
| Plac-cita-fluo      | 0.090 | 0.297 | 0.302 | 0.763 | (0.00, 0.67) | 0.077 |
| Plac-dulo-fluo      | 0.088 | 0.386 | 0.229 | 0.819 | (0.00, 0.84) | 0.087 |
| Plac-mirt-paro      | 0.086 | 0.198 | 0.436 | 0.663 | (0.00, 0.47) | 0.017 |
| Plac-bupr-esci      | 0.084 | 0.252 | 0.332 | 0.740 | (0.00, 0.58) | 0.035 |
| amit-sert-venl      | 0.082 | 0.389 | 0.210 | 0.834 | (0.00, 0.84) | 0.034 |
| agom-esci-venl      | 0.080 | 0.353 | 0.226 | 0.821 | (0.00, 0.77) | 0.000 |
| clom-miln-paro      | 0.080 | 0.637 | 0.125 | 0.900 | (0.00, 1.33) | 0.069 |
| fluo-mirt-sert      | 0.080 | 0.331 | 0.240 | 0.810 | (0.00, 0.73) | 0.016 |
| cita-mirt-paro      | 0.079 | 0.646 | 0.123 | 0.903 | (0.00, 1.34) | 0.074 |
| clom-paro-traz      | 0.076 | 0.708 | 0.108 | 0.914 | (0.00, 1.46) | 0.105 |
| esci-fluo-paro      | 0.075 | 0.270 | 0.278 | 0.781 | (0.00, 0.60) | 0.035 |
| amit-mirt-paro      | 0.074 | 0.358 | 0.207 | 0.836 | (0.00, 0.78) | 0.091 |
| Plac-nefa-sert      | 0.073 | 0.393 | 0.185 | 0.853 | (0.00, 0.84) | 0.024 |
| Plac-agom-fluo      | 0.073 | 0.232 | 0.314 | 0.753 | (0.00, 0.53) | 0.094 |
| bupr-esci-paro      | 0.072 | 0.444 | 0.162 | 0.871 | (0.00, 0.94) | 0.021 |
| amit-fluv-paro      | 0.071 | 0.547 | 0.129 | 0.897 | (0.00, 1.14) | 0.125 |
| amit-fluo-miln      | 0.069 | 0.426 | 0.162 | 0.871 | (0.00, 0.90) | 0.037 |
| Plac-agom-dulo      | 0.069 | 0.345 | 0.200 | 0.842 | (0.00, 0.75) | 0.059 |
| Plac-cita-clom-traz | 0.068 | 0.691 | 0.099 | 0.921 | (0.00, 1.42) | 0.044 |
| amit-fluo-paro      | 0.065 | 0.234 | 0.279 | 0.780 | (0.00, 0.52) | 0.047 |
| Plac-sert-venl      | 0.057 | 0.237 | 0.240 | 0.810 | (0.00, 0.52) | 0.021 |



|                 |       |       |       |       |             |       |
|-----------------|-------|-------|-------|-------|-------------|-------|
| Plac-cita-sert  | 0.053 | 0.271 | 0.197 | 0.843 | (0.00,0.58) | 0.025 |
| cita-clom-fluv  | 0.051 | 0.707 | 0.072 | 0.942 | (0.00,1.44) | 0.000 |
| cita-paro-rebo  | 0.043 | 0.341 | 0.125 | 0.901 | (0.00,0.71) | 0.000 |
| amit-miln-paro  | 0.039 | 0.474 | 0.082 | 0.935 | (0.00,0.97) | 0.091 |
| bupr-eseci-venl | 0.039 | 0.486 | 0.079 | 0.937 | (0.00,0.99) | 0.059 |
| amit-fluo-fluv  | 0.038 | 0.362 | 0.104 | 0.917 | (0.00,0.75) | 0.001 |
| fluo-paro-rebo  | 0.034 | 0.248 | 0.135 | 0.892 | (0.00,0.52) | 0.030 |
| eseci-paro-sert | 0.031 | 0.317 | 0.098 | 0.922 | (0.00,0.65) | 0.012 |
| Plac-bupr-sert  | 0.030 | 1.078 | 0.028 | 0.978 | (0.00,2.14) | 0.046 |
| Plac-eseci-sert | 0.029 | 0.232 | 0.126 | 0.900 | (0.00,0.48) | 0.020 |
| bupr-paro-sert  | 0.026 | 1.086 | 0.024 | 0.981 | (0.00,2.16) | 0.000 |
| Plac-fluo-venl  | 0.024 | 0.152 | 0.156 | 0.876 | (0.00,0.32) | 0.060 |
| Plac-paro-rebo  | 0.020 | 0.200 | 0.099 | 0.921 | (0.00,0.41) | 0.034 |
| Plac-fluo-traz  | 0.009 | 0.418 | 0.022 | 0.983 | (0.00,0.83) | 0.118 |

#### 7.4.1.2 Side-splitting

| Side       | Direct   |           | Indirect  |           | Difference |           | P> z  |
|------------|----------|-----------|-----------|-----------|------------|-----------|-------|
|            | Coef.    | Std. Err. | Coef.     | Std. Err. | Coef.      | Std. Err. |       |
| Plac agom  | .4415803 | .0859582  | .552755   | .0988431  | -.1111747  | .1311493  | 0.397 |
| Plac amit  | .9573629 | .0946638  | .5878816  | .0787163  | .3694813   | .1234582  | 0.003 |
| Plac bupr  | .3654864 | .0927772  | .630745   | .1532968  | -.2652586  | .1790409  | 0.138 |
| Plac cita  | .4110246 | .095197   | .4202149  | .0913897  | -.0091903  | .1324423  | 0.945 |
| Plac dulo  | .6497865 | .0689822  | .5257675  | .0962146  | .124019    | .1194443  | 0.299 |
| Plac esci  | .3632665 | .0702393  | .706371   | .0821739  | -.3431045  | .1086326  | 0.002 |
| Plac fluo  | .3491209 | .0597523  | .4697402  | .0571303  | -.1206194  | .082804   | 0.145 |
| Plac fluv  | .7099613 | .1459749  | .3942117  | .1116645  | .3157496   | .183787   | 0.086 |
| Plac mirt  | .5714965 | .1255684  | .6470928  | .0916331  | -.0755964  | .1567508  | 0.630 |
| Plac nefa  | .5510253 | .1502111  | .4301954  | .1971884  | .12083     | .2478859  | 0.626 |
| Plac paro  | .4974848 | .054954   | .5967459  | .0590759  | -.0992611  | .0806961  | 0.219 |
| Plac rebo  | .3352179 | .1079945  | .2476209  | .1370544  | .087597    | .1744892  | 0.616 |
| Plac sert  | .4680976 | .083469   | .5270112  | .0785816  | -.0589136  | .1147002  | 0.608 |
| Plac traz  | .5641814 | .1486057  | .263633   | .1282519  | .3005485   | .1967293  | 0.127 |
| Plac venl  | .5815499 | .0724536  | .5545188  | .0671739  | .0270311   | .0989629  | 0.785 |
| Plac vort  | .543535  | .0765498  | .2959051  | .1789759  | .2476298   | .1967578  | 0.208 |
| agom dulo  | .2747858 | .2866702  | .1039066  | .0854803  | .1708792   | .2991433  | 0.568 |
| agom esci- | .2080054 | .2595283  | .0432264  | .0844806  | -.2512319  | .2729249  | 0.357 |
| agom fluo- | .0056701 | .1392716  | -.1025954 | .0825508  | .0969253   | .1621819  | 0.550 |
| agom paro  | .1585275 | .1334393  | .0141641  | .0826539  | .1443634   | .1569268  | 0.358 |
| agom venl- | .3052271 | .2372624  | .1220368  | .0808622  | -.4272639  | .2506652  | 0.088 |
| amit fluo- | .0630969 | .1615738  | -.3806954 | .0728447  | .3175985   | .1772401  | 0.073 |
| amit fluv- | .0850522 | .2616439  | -.2533867 | .1090556  | .1683345   | .2834592  | 0.553 |
| amit miln- | .1562593 | .3178515  | -.207626  | .1404851  | .0513667   | .3474751  | 0.882 |
| amit mirt- | .0466865 | .230338   | -.1310849 | .0959596  | .0843985   | .2495215  | 0.735 |
| amit paro- | .0673421 | .123842   | -.2437107 | .0758295  | .1763686   | .1451395  | 0.224 |
| amit sert  | -.251999 | .133142   | -.2344901 | .0891939  | -.0175088  | .1602584  | 0.913 |
| amit traz- | .2445385 | .2509759  | -.3707502 | .1197354  | .1262117   | .2780513  | 0.650 |
| amit venl- | .1688681 | .2956097  | -.1724617 | .0759378  | .0035936   | .3051982  | 0.991 |
| bupr esci  | .0692227 | .2203113  | .0722108  | .1023087  | -.0029882  | .2429165  | 0.990 |
| bupr fluo  | .1749594 | .1888126  | -.0766353 | .0965806  | .2515947   | .2120367  | 0.235 |
| bupr paro- | .0008168 | .3902452  | .1124624  | .0892135  | -.1132791  | .4003128  | 0.777 |
| bupr sert  | .0645308 | 1.034954  | .0625573  | .0968483  | .0019735   | 1.039476  | 0.998 |
| bupr traz- | .7396667 | .4164884  | .0203062  | .1272056  | -.759973   | .4354812  | 0.081 |
| bupr venl- | .1588537 | .2893555  | .1613214  | .0949315  | -.3201751  | .3045301  | 0.293 |
| cita clom  | .5667569 | .4256849  | -.0757    | .1267543  | .6424569   | .4441557  | 0.148 |
| cita esci  | .2959492 | .1130309  | -.0570246 | .0970747  | .3529738   | .1489159  | 0.018 |
| cita fluo  | .0373023 | .2150543  | -.0089074 | .0777329  | .0462097   | .2286697  | 0.840 |
| cita fluv  | -.101741 | .3558693  | .1142703  | .1115056  | -.2160113  | .3729295  | 0.562 |
| cita mirt- | .2805179 | .4062032  | .2327475  | .0975157  | -.5132655  | .4177443  | 0.219 |
| cita paro- | .3038272 | .309122   | .1542744  | .0757133  | -.4581016  | .3188031  | 0.151 |
| cita rebo- | .5478924 | .2878079  | -.0521753 | .1093527  | -.4957171  | .3078821  | 0.107 |
| cita sert  | .1134413 | .2503919  | .0798717  | .0874143  | .0335696   | .2652213  | 0.899 |
| cita venl- | .5482632 | .3429272  | .1899551  | .0807923  | -.7382183  | .3524547  | 0.036 |
| cita vila  | .1041882 | .2014791  | .0255024  | .1530279  | .0786858   | .2530667  | 0.756 |
| clom fluo  | .4934394 | .2508941  | -.0903415 | .1209183  | .5837809   | .2785093  | 0.036 |
| clom fluv- | .6174263 | .5351887  | .1673986  | .1381831  | -.784825   | .55274    | 0.156 |
| clom miln  | .1397623 | .4403739  | .1486538  | .1627557  | -.0088915  | .4694876  | 0.985 |
| clom paro  | .0973774 | .1597419  | .1944209  | .1428646  | -.0970435  | .2142756  | 0.651 |
| clom sert  | .0462692 | .2857686  | .1187204  | .1260841  | -.0724512  | .3123477  | 0.817 |
| clom traz- | .4890301 | .4360124  | .0550663  | .1471523  | -.5440964  | .4601168  | 0.237 |
| clom venl  | .49003   | .3213696  | .1290924  | .1215146  | .3609376   | .343935   | 0.294 |
| desv dulo  | .2079944 | .2756128  | .2145641  | .1128804  | -.0065697  | .2988051  | 0.982 |

```

dulo esci .1675942 .1671796 -.1601184 .0802877 .3277126 .1854881 0.077
dulo fluo -.179041 .316276 -.1959446 .0681761 .0169036 .3241009 0.958
dulo paro .0178401 .1182892 -.0969464 .0752425 .1147865 .1407065 0.415
dulo venl .1064391 .1996747 -.0608894 .0746071 .1673286 .2131564 0.432
dulo vort-.3047269 .1163128 .0755919 .1098213 -.3803188 .1606357 0.018
esci fluo-.1131038 .190763 -.0943116 .0674105 -.0187922 .2023511 0.926
esci paro .0054384 .1680778 .0399973 .0677852 -.0345589 .1813445 0.849
esci sert .1145127 .2239114 -.0247132 .0791709 .1392258 .2373798 0.558
esci venl-.1908574 .2416769 .0803873 .0719146 -.2712447 .2521516 0.282
fluo fluv .0307123 .2798662 .1070203 .0989596 -.0763079 .2968446 0.797
fluo miln-.1627381 .235568 .2348533 .1432085 -.3975914 .275769 0.149
fluo mirt .2751742 .1647164 .1893777 .0879108 .0857964 .1867878 0.646
fluo nefa .0369471 .3374653 .1034088 .133157 -.0664617 .3627892 0.855
fluo paro .0548377 .1036025 .1541233 .0564049 -.0992856 .1179038 0.400
fluo rebo-.1965862 .1790166 -.0819737 .10334 -.1146125 .206584 0.579
fluo sert .3546302 .1450259 .0232907 .0709925 .3313395 .1614537 0.040
fluo traz .1798791 .2929184 -.0475743 .1081022 .2274535 .312223 0.466
fluo venl .2199441 .0971524 .1225745 .0682736 .0973696 .1187474 0.412
fluv miln .5392491 .3087935 -.1019523 .1562422 .6412014 .3460707 0.064
fluv mirt .1315915 .2478076 .1049325 .1185017 .026659 .2746788 0.923
fluv paro .1277775 .3356916 .0249831 .097057 .1027945 .3494645 0.769
fluv sert-.4433568 .3346439 .0315004 .1055039 -.4748572 .3508828 0.176
fluv venl .8605743 .4627316 .0182338 .1003474 .8423405 .4734871 0.075
miln paro .0492335 .1892725 -.0275477 .1566732 .0767812 .2457054 0.755
miln sert-.7356996 .9342899 -.0267323 .1317377 -.7089674 .9435319 0.452
mirt paro .0318853 .1651668 -.1074174 .0874072 .1393026 .1868296 0.456
mirt sert .0262103 .3002919 -.1351149 .0918016 .1613252 .3140108 0.607
mirt traz-.4064169 .2740671 -.1910906 .1261943 -.2153263 .3016927 0.475
mirt venl-.3119721 .2216931 -.0121174 .0889142 -.2998547 .2388589 0.209
nefa paro .2805387 .3107846 -.0086226 .1345662 .2891613 .3385718 0.393
nefa sert-.1541509 .3719155 .0127929 .1376809 -.1669437 .3965819 0.674
paro rebo-.2133283 .1574656 -.2553783 .1073656 .04205 .1906199 0.825
paro sert .1066496 .2307413 -.0574073 .0677966 .1640569 .2405039 0.495
paro traz-.5413155 .295477 -.0999722 .1074826 -.4413434 .3144588 0.160
paro venl .4321144 .1987847 -.015208 .0609504 .4473223 .2080984 0.032
rebo venl-.0436753 .3674653 .2874033 .0979636 -.3310786 .3802993 0.384
sert traz .5806296 .4384827 -.1524673 .1121787 .7330969 .4526049 0.105
sert venl .1659343 .223033 .056731 .0743749 .1092033 .2351095 0.642
traz venl .4688603 .2919782 .1306436 .1129111 .3382167 .3135498 0.281
venl vort .2070379 .2081842 -.1126351 .0884713 .3196731 .2265198 0.158

```

### 7.4.1.3 Design-by-treatment test

chi2(141) = 151.12

Prob > chi2 = 0.0631

## 7.4.2 Dropouts for any reason

### 7.4.2.1 Loop-specific approach

Loops With Evidence of Statistical Inconsistency:

| Loop           | IF    | seIF  | z_value | p_value | CI_95        | Loop_Heterog_tau2 |
|----------------|-------|-------|---------|---------|--------------|-------------------|
| cita-clom-venl | 2.706 | 1.055 | 2.566   | 0.010   | (0.64, 4.77) | 0.000             |
| cita-fluv-venl | 2.514 | 0.995 | 2.526   | 0.012   | (0.56, 4.46) | 0.000             |
| cita-paro-venl | 2.271 | 0.897 | 2.532   | 0.011   | (0.51, 4.03) | 0.000             |
| Plac-cita-venl | 2.202 | 0.890 | 2.474   | 0.013   | (0.46, 3.95) | 0.038             |
| cita-esci-venl | 2.163 | 0.869 | 2.490   | 0.013   | (0.46, 3.87) | 0.000             |
| cita-fluo-venl | 2.162 | 0.858 | 2.520   | 0.012   | (0.48, 3.84) | 0.000             |
| cita-clom-sert | 1.534 | 0.652 | 2.354   | 0.019   | (0.26, 2.81) | 0.000             |
| agom-dulo-venl | 1.312 | 0.392 | 3.349   | 0.001   | (0.54, 2.08) | 0.000             |
| fluv-mirt-venl | 1.180 | 0.539 | 2.190   | 0.029   | (0.12, 2.24) | 0.000             |
| Plac-cita-mirt | 0.989 | 0.467 | 2.119   | 0.034   | (0.07, 1.90) | 0.000             |

|                |       |       |       |       |             |       |
|----------------|-------|-------|-------|-------|-------------|-------|
| agom-paro-venl | 0.906 | 0.314 | 2.887 | 0.004 | (0.29,1.52) | 0.000 |
| dulo-venl-vort | 0.824 | 0.352 | 2.344 | 0.019 | (0.13,1.51) | 0.033 |
| dulo-fluo-venl | 0.796 | 0.363 | 2.196 | 0.028 | (0.09,1.51) | 0.000 |
| cita-fluo-sert | 0.757 | 0.368 | 2.054 | 0.040 | (0.03,1.48) | 0.008 |
| Plac-amit-fluo | 0.581 | 0.251 | 2.317 | 0.021 | (0.09,1.07) | 0.126 |
| Plac-amit-sert | 0.534 | 0.210 | 2.538 | 0.011 | (0.12,0.95) | 0.043 |

Loops Without Evidence of Statistical Inconsistency:

| Loop                | IF    | seIF  | z_value | p_value | CI_95       | Loop_Heterog_tau2 |
|---------------------|-------|-------|---------|---------|-------------|-------------------|
| Plac-clom-sert      | 1.440 | 0.906 | 1.589   | 0.112   | (0.00,3.21) | 0.020             |
| cita-sert-venl      | 1.365 | 1.167 | 1.170   | 0.242   | (0.00,3.65) | 0.283             |
| Plac-clom-paro      | 1.182 | 0.856 | 1.382   | 0.167   | (0.00,2.86) | 0.032             |
| fluo-sert-traz      | 1.173 | 0.839 | 1.398   | 0.162   | (0.00,2.82) | 0.085             |
| amit-fluv-sert      | 1.060 | 0.588 | 1.802   | 0.072   | (0.00,2.21) | 0.032             |
| Plac-clom-fluo      | 1.051 | 0.986 | 1.065   | 0.287   | (0.00,2.98) | 0.128             |
| cita-clom-paro      | 1.016 | 0.593 | 1.713   | 0.087   | (0.00,2.18) | 0.000             |
| amit-bupr-fluo      | 0.998 | 0.566 | 1.763   | 0.078   | (0.00,2.11) | 0.000             |
| cita-mirt-venl      | 0.981 | 0.960 | 1.022   | 0.307   | (0.00,2.86) | 0.000             |
| amit-fluv-venl      | 0.981 | 0.676 | 1.450   | 0.147   | (0.00,2.31) | 0.042             |
| cita-mirt-paro      | 0.931 | 0.554 | 1.679   | 0.093   | (0.00,2.02) | 0.000             |
| cita-fluv-sert      | 0.924 | 1.314 | 0.703   | 0.482   | (0.00,3.50) | 0.484             |
| clom-fluo-fluv      | 0.902 | 0.909 | 0.992   | 0.321   | (0.00,2.68) | 0.000             |
| mirt-sert-traz      | 0.900 | 0.710 | 1.268   | 0.205   | (0.00,2.29) | 0.000             |
| agom-dulo-esci      | 0.887 | 0.542 | 1.637   | 0.102   | (0.00,1.95) | 0.064             |
| amit-bupr-paro      | 0.885 | 0.735 | 1.205   | 0.228   | (0.00,2.32) | 0.040             |
| Plac-clom-venl      | 0.836 | 1.018 | 0.821   | 0.411   | (0.00,2.83) | 0.060             |
| Plac-fluv-sert      | 0.825 | 0.515 | 1.600   | 0.110   | (0.00,1.83) | 0.027             |
| cita-fluo-mirt      | 0.787 | 0.672 | 1.171   | 0.242   | (0.00,2.10) | 0.109             |
| paro-sert-traz      | 0.779 | 0.890 | 0.876   | 0.381   | (0.00,2.52) | 0.071             |
| clom-fluv-paro      | 0.776 | 0.881 | 0.881   | 0.379   | (0.00,2.50) | 0.000             |
| cita-clom-fluo      | 0.774 | 0.608 | 1.273   | 0.203   | (0.00,1.97) | 0.000             |
| amit-bupr-venl      | 0.735 | 0.637 | 1.153   | 0.249   | (0.00,1.98) | 0.000             |
| fluo-nefa-sert      | 0.731 | 0.648 | 1.127   | 0.260   | (0.00,2.00) | 0.029             |
| fluv-paro-sert      | 0.697 | 0.678 | 1.028   | 0.304   | (0.00,2.03) | 0.033             |
| Plac-sert-traz      | 0.696 | 0.629 | 1.106   | 0.269   | (0.00,1.93) | 0.010             |
| fluv-mirt-sert      | 0.696 | 0.851 | 0.818   | 0.413   | (0.00,2.36) | 0.095             |
| fluo-fluv-venl      | 0.683 | 0.541 | 1.263   | 0.207   | (0.00,1.74) | 0.000             |
| miln-paro-sert      | 0.675 | 0.614 | 1.100   | 0.271   | (0.00,1.88) | 0.000             |
| cita-esci-sert      | 0.663 | 0.355 | 1.867   | 0.062   | (0.00,1.36) | 0.000             |
| bupr-paro-traz      | 0.656 | 0.610 | 1.076   | 0.282   | (0.00,1.85) | 0.000             |
| amit-bupr-esci-sert | 0.644 | 0.607 | 1.061   | 0.289   | (0.00,1.83) | 0.000             |
| Plac-amit-fluv      | 0.644 | 0.408 | 1.577   | 0.115   | (0.00,1.44) | 0.121             |
| amit-sert-traz      | 0.634 | 0.669 | 0.948   | 0.343   | (0.00,1.95) | 0.000             |
| Plac-fluv-venl      | 0.617 | 0.542 | 1.138   | 0.255   | (0.00,1.68) | 0.050             |
| fluv-mirt-paro      | 0.614 | 0.431 | 1.423   | 0.155   | (0.00,1.46) | 0.000             |
| dulo-esci-fluo      | 0.595 | 0.508 | 1.171   | 0.241   | (0.00,1.59) | 0.098             |
| Plac-fluo-nefa      | 0.594 | 0.537 | 1.106   | 0.269   | (0.00,1.65) | 0.116             |
| clom-fluv-sert      | 0.592 | 1.393 | 0.425   | 0.671   | (0.00,3.32) | 0.288             |
| clom-paro-venl      | 0.580 | 0.465 | 1.247   | 0.212   | (0.00,1.49) | 0.000             |
| mirt-paro-sert      | 0.573 | 0.376 | 1.525   | 0.127   | (0.00,1.31) | 0.000             |
| Plac-agom-venl      | 0.569 | 0.323 | 1.764   | 0.078   | (0.00,1.20) | 0.053             |
| agom-fluo-venl      | 0.563 | 0.331 | 1.700   | 0.089   | (0.00,1.21) | 0.033             |
| amit-fluv-paro      | 0.549 | 0.469 | 1.170   | 0.242   | (0.00,1.47) | 0.038             |
| fluo-fluv-sert      | 0.534 | 0.675 | 0.792   | 0.428   | (0.00,1.86) | 0.057             |
| amit-fluv-miln      | 0.518 | 0.564 | 0.919   | 0.358   | (0.00,1.62) | 0.009             |
| Plac-amit-traz      | 0.508 | 0.389 | 1.308   | 0.191   | (0.00,1.27) | 0.090             |
| bupr-fluo-traz      | 0.505 | 0.572 | 0.882   | 0.378   | (0.00,1.63) | 0.027             |
| amit-bupr-traz      | 0.504 | 0.688 | 0.733   | 0.464   | (0.00,1.85) | 0.000             |
| amit-fluo-sert      | 0.495 | 0.257 | 1.928   | 0.054   | (0.00,1.00) | 0.000             |
| bupr-esci-sert-traz | 0.494 | 0.763 | 0.648   | 0.517   | (0.00,1.99) | 0.000             |
| Plac-venl-vort      | 0.488 | 0.263 | 1.859   | 0.063   | (0.00,1.00) | 0.033             |
| fluo-mirt-venl      | 0.485 | 0.307 | 1.578   | 0.114   | (0.00,1.09) | 0.032             |
| amit-mirt-venl      | 0.482 | 0.418 | 1.153   | 0.249   | (0.00,1.30) | 0.000             |
| fluo-nefa-paro      | 0.475 | 0.543 | 0.873   | 0.383   | (0.00,1.54) | 0.000             |
| amit-miln-sert      | 0.468 | 0.675 | 0.693   | 0.488   | (0.00,1.79) | 0.000             |
| fluo-mirt-paro      | 0.460 | 0.243 | 1.896   | 0.058   | (0.00,0.94) | 0.005             |
| Plac-cita-sert      | 0.454 | 0.294 | 1.543   | 0.123   | (0.00,1.03) | 0.013             |
| Plac-cita-rebo      | 0.453 | 0.473 | 0.958   | 0.338   | (0.00,1.38) | 0.080             |
| Plac-dulo-fluo      | 0.431 | 0.389 | 1.108   | 0.268   | (0.00,1.19) | 0.081             |
| Plac-mirt-sert      | 0.416 | 0.313 | 1.329   | 0.184   | (0.00,1.03) | 0.009             |
| clom-sert-venl      | 0.410 | 0.870 | 0.472   | 0.637   | (0.00,2.12) | 0.221             |
| Plac-dulo-esci      | 0.409 | 0.221 | 1.852   | 0.064   | (0.00,0.84) | 0.039             |
| mirt-traz-venl      | 0.399 | 0.471 | 0.847   | 0.397   | (0.00,1.32) | 0.000             |

|                |       |       |       |       |             |       |
|----------------|-------|-------|-------|-------|-------------|-------|
| mirt-paro-traz | 0.390 | 0.497 | 0.786 | 0.432 | (0.00,1.36) | 0.035 |
| amit-fluo-paro | 0.385 | 0.223 | 1.727 | 0.084 | (0.00,0.82) | 0.000 |
| Plac-fluo-sert | 0.384 | 0.242 | 1.587 | 0.113 | (0.00,0.86) | 0.088 |
| Plac-dulo-venl | 0.382 | 0.245 | 1.558 | 0.119 | (0.00,0.86) | 0.029 |
| bupr-traz-venl | 0.382 | 0.545 | 0.701 | 0.483 | (0.00,1.45) | 0.000 |
| agom-esci-venl | 0.370 | 0.430 | 0.861 | 0.389 | (0.00,1.21) | 0.000 |
| agom-esci-paro | 0.366 | 0.365 | 1.005 | 0.315 | (0.00,1.08) | 0.000 |
| agom-esci-fluo | 0.363 | 0.501 | 0.725 | 0.469 | (0.00,1.34) | 0.104 |
| mirt-paro-venl | 0.359 | 0.298 | 1.204 | 0.229 | (0.00,0.94) | 0.000 |
| Plac-fluv-mirt | 0.355 | 0.291 | 1.218 | 0.223 | (0.00,0.93) | 0.000 |
| Plac-agom-dulo | 0.354 | 0.318 | 1.115 | 0.265 | (0.00,0.98) | 0.020 |
| cita-fluv-mirt | 0.353 | 0.600 | 0.589 | 0.556 | (0.00,1.53) | 0.000 |
| amit-fluo-miln | 0.344 | 0.451 | 0.763 | 0.445 | (0.00,1.23) | 0.000 |
| paro-traz-venl | 0.343 | 0.468 | 0.733 | 0.464 | (0.00,1.26) | 0.000 |
| Plac-cita-clom | 0.342 | 0.964 | 0.355 | 0.723 | (0.00,2.23) | 0.000 |
| fluo-paro-sert | 0.341 | 0.275 | 1.239 | 0.215 | (0.00,0.88) | 0.000 |
| cita-fluo-fluv | 0.331 | 0.479 | 0.691 | 0.489 | (0.00,1.27) | 0.000 |
| Plac-bupr-paro | 0.325 | 0.453 | 0.716 | 0.474 | (0.00,1.21) | 0.029 |
| dulo-esci-paro | 0.324 | 0.287 | 1.130 | 0.258 | (0.00,0.89) | 0.015 |
| esci-paro-sert | 0.322 | 0.425 | 0.758 | 0.448 | (0.00,1.16) | 0.034 |
| amit-mirt-paro | 0.319 | 0.316 | 1.009 | 0.313 | (0.00,0.94) | 0.017 |
| amit-paro-traz | 0.314 | 0.451 | 0.695 | 0.487 | (0.00,1.20) | 0.031 |
| fluo-miln-sert | 0.311 | 0.620 | 0.501 | 0.616 | (0.00,1.53) | 0.006 |
| clom-paro-sert | 0.297 | 0.418 | 0.710 | 0.478 | (0.00,1.12) | 0.000 |
| Plac-amit-bupr | 0.295 | 0.612 | 0.482 | 0.630 | (0.00,1.49) | 0.078 |
| Plac-esci-fluo | 0.291 | 0.276 | 1.054 | 0.292 | (0.00,0.83) | 0.080 |
| dulo-fluo-paro | 0.290 | 0.331 | 0.874 | 0.382 | (0.00,0.94) | 0.000 |
| fluo-paro-venl | 0.285 | 0.211 | 1.349 | 0.177 | (0.00,0.70) | 0.000 |
| amit-fluo-venl | 0.285 | 0.359 | 0.794 | 0.427 | (0.00,0.99) | 0.000 |
| Plac-amit-paro | 0.282 | 0.192 | 1.475 | 0.140 | (0.00,0.66) | 0.065 |
| Plac-cita-fluv | 0.282 | 0.356 | 0.792 | 0.428 | (0.00,0.98) | 0.000 |
| Plac-amit-venl | 0.280 | 0.416 | 0.675 | 0.500 | (0.00,1.09) | 0.095 |
| amit-fluo-mirt | 0.279 | 0.343 | 0.813 | 0.416 | (0.00,0.95) | 0.026 |
| amit-fluv-mirt | 0.279 | 0.402 | 0.694 | 0.488 | (0.00,1.07) | 0.001 |
| cita-fluo-rebo | 0.277 | 0.365 | 0.759 | 0.448 | (0.00,0.99) | 0.000 |
| Plac-bupr-traz | 0.261 | 0.397 | 0.657 | 0.511 | (0.00,1.04) | 0.000 |
| Plac-clom-fluv | 0.255 | 1.177 | 0.217 | 0.828 | (0.00,2.56) | 0.008 |
| Plac-sert-venl | 0.244 | 0.301 | 0.811 | 0.417 | (0.00,0.84) | 0.051 |
| bupr-fluo-paro | 0.239 | 0.441 | 0.542 | 0.588 | (0.00,1.10) | 0.000 |
| Plac-paro-venl | 0.236 | 0.240 | 0.984 | 0.325 | (0.00,0.71) | 0.043 |
| amit-mirt-traz | 0.235 | 0.438 | 0.538 | 0.591 | (0.00,1.09) | 0.000 |
| Plac-nefa-sert | 0.234 | 0.426 | 0.548 | 0.584 | (0.00,1.07) | 0.019 |
| cita-paro-sert | 0.231 | 0.459 | 0.504 | 0.614 | (0.00,1.13) | 0.007 |
| clom-fluo-venl | 0.230 | 0.510 | 0.450 | 0.653 | (0.00,1.23) | 0.000 |
| Plac-mirt-venl | 0.227 | 0.273 | 0.833 | 0.405 | (0.00,0.76) | 0.033 |
| amit-paro-sert | 0.222 | 0.285 | 0.780 | 0.435 | (0.00,0.78) | 0.008 |
| dulo-paro-venl | 0.221 | 0.270 | 0.819 | 0.413 | (0.00,0.75) | 0.000 |
| cita-clom-fluv | 0.203 | 1.007 | 0.202 | 0.840 | (0.00,2.18) | 0.000 |
| Plac-mirt-traz | 0.201 | 0.318 | 0.631 | 0.528 | (0.00,0.82) | 0.000 |
| Plac-nefa-paro | 0.201 | 0.371 | 0.541 | 0.589 | (0.00,0.93) | 0.035 |
| Plac-fluo-mirt | 0.193 | 0.284 | 0.679 | 0.497 | (0.00,0.75) | 0.111 |
| fluo-fluv-paro | 0.191 | 0.443 | 0.431 | 0.666 | (0.00,1.06) | 0.000 |
| bupr-esci-fluo | 0.188 | 0.317 | 0.592 | 0.554 | (0.00,0.81) | 0.007 |
| amit-paro-venl | 0.185 | 0.368 | 0.504 | 0.614 | (0.00,0.91) | 0.000 |
| agom-dulo-paro | 0.185 | 0.305 | 0.606 | 0.545 | (0.00,0.78) | 0.000 |
| Plac-bupr-fluo | 0.177 | 0.278 | 0.637 | 0.524 | (0.00,0.72) | 0.086 |
| cita-fluo-paro | 0.176 | 0.361 | 0.489 | 0.625 | (0.00,0.88) | 0.000 |
| Plac-fluv-paro | 0.173 | 0.380 | 0.454 | 0.650 | (0.00,0.92) | 0.033 |
| fluo-fluv-miln | 0.171 | 0.491 | 0.349 | 0.727 | (0.00,1.13) | 0.000 |
| Plac-cita-paro | 0.170 | 0.363 | 0.467 | 0.640 | (0.00,0.88) | 0.031 |
| esci-paro-venl | 0.170 | 0.342 | 0.497 | 0.620 | (0.00,0.84) | 0.000 |
| Plac-bupr-venl | 0.161 | 0.318 | 0.506 | 0.613 | (0.00,0.78) | 0.036 |
| Plac-fluo-rebo | 0.158 | 0.313 | 0.504 | 0.614 | (0.00,0.77) | 0.125 |
| Plac-desv-dulo | 0.152 | 0.288 | 0.529 | 0.597 | (0.00,0.72) | 0.022 |
| amit-traz-venl | 0.152 | 0.528 | 0.287 | 0.774 | (0.00,1.19) | 0.000 |
| fluo-mirt-traz | 0.147 | 0.631 | 0.233 | 0.816 | (0.00,1.38) | 0.200 |
| fluo-traz-venl | 0.147 | 0.512 | 0.286 | 0.775 | (0.00,1.15) | 0.027 |
| Plac-fluo-traz | 0.146 | 0.421 | 0.347 | 0.729 | (0.00,0.97) | 0.116 |
| cita-esci-fluo | 0.140 | 0.300 | 0.467 | 0.640 | (0.00,0.73) | 0.004 |
| Plac-esci-paro | 0.139 | 0.255 | 0.546 | 0.585 | (0.00,0.64) | 0.045 |
| cita-mirt-sert | 0.137 | 0.572 | 0.239 | 0.811 | (0.00,1.26) | 0.000 |
| cita-paro-rebo | 0.136 | 0.642 | 0.212 | 0.832 | (0.00,1.39) | 0.089 |
| esci-fluo-venl | 0.135 | 0.334 | 0.402 | 0.687 | (0.00,0.79) | 0.023 |
| fluo-mirt-sert | 0.134 | 0.510 | 0.263 | 0.793 | (0.00,1.13) | 0.098 |
| Plac-esci-sert | 0.115 | 0.294 | 0.391 | 0.696 | (0.00,0.69) | 0.046 |
| amit-sert-venl | 0.113 | 0.436 | 0.259 | 0.795 | (0.00,0.97) | 0.027 |
| Plac-fluo-paro | 0.111 | 0.157 | 0.709 | 0.478 | (0.00,0.42) | 0.068 |

|                |       |       |       |       |             |       |
|----------------|-------|-------|-------|-------|-------------|-------|
| Plac-paro-traz | 0.107 | 0.362 | 0.296 | 0.767 | (0.00,0.82) | 0.034 |
| Plac-paro-rebo | 0.107 | 0.245 | 0.437 | 0.662 | (0.00,0.59) | 0.062 |
| Plac-agom-esci | 0.107 | 0.370 | 0.289 | 0.773 | (0.00,0.83) | 0.051 |
| Plac-agom-paro | 0.104 | 0.189 | 0.551 | 0.582 | (0.00,0.48) | 0.037 |
| fluo-sert-venl | 0.103 | 0.337 | 0.307 | 0.758 | (0.00,0.76) | 0.033 |
| nefa-paro-sert | 0.103 | 0.517 | 0.199 | 0.842 | (0.00,1.12) | 0.000 |
| Plac-esci-venl | 0.100 | 0.317 | 0.314 | 0.753 | (0.00,0.72) | 0.057 |
| Plac-dulo-paro | 0.100 | 0.155 | 0.643 | 0.520 | (0.00,0.40) | 0.024 |
| Plac-dulo-vort | 0.099 | 0.161 | 0.617 | 0.537 | (0.00,0.41) | 0.010 |
| Plac-mirt-paro | 0.096 | 0.224 | 0.429 | 0.668 | (0.00,0.54) | 0.027 |
| Plac-fluo-fluv | 0.094 | 0.442 | 0.212 | 0.832 | (0.00,0.96) | 0.112 |
| Plac-bupr-esci | 0.090 | 0.271 | 0.331 | 0.741 | (0.00,0.62) | 0.034 |
| agom-fluo-paro | 0.087 | 0.192 | 0.454 | 0.650 | (0.00,0.46) | 0.000 |
| dulo-esci-venl | 0.079 | 0.400 | 0.199 | 0.842 | (0.00,0.86) | 0.037 |
| Plac-cita-esci | 0.079 | 0.203 | 0.389 | 0.698 | (0.00,0.48) | 0.028 |
| bupr-esci-paro | 0.078 | 0.495 | 0.157 | 0.875 | (0.00,1.05) | 0.003 |
| fluo-paro-rebo | 0.077 | 0.215 | 0.360 | 0.719 | (0.00,0.50) | 0.000 |
| fluo-paro-traz | 0.073 | 0.403 | 0.181 | 0.856 | (0.00,0.86) | 0.000 |
| bupr-paro-venl | 0.068 | 0.490 | 0.139 | 0.889 | (0.00,1.03) | 0.000 |
| clom-fluo-paro | 0.065 | 0.320 | 0.204 | 0.838 | (0.00,0.69) | 0.000 |
| cita-esci-paro | 0.062 | 0.373 | 0.167 | 0.867 | (0.00,0.79) | 0.000 |
| fluv-miln-sert | 0.056 | 1.119 | 0.050 | 0.960 | (0.00,2.25) | 0.183 |
| agom-dulo-fluo | 0.055 | 0.565 | 0.097 | 0.923 | (0.00,1.16) | 0.082 |
| esci-sert-venl | 0.054 | 0.582 | 0.092 | 0.926 | (0.00,1.19) | 0.125 |
| Plac-cita-vila | 0.053 | 0.230 | 0.232 | 0.817 | (0.00,0.50) | 0.000 |
| fluo-fluv-mirt | 0.051 | 0.544 | 0.094 | 0.925 | (0.00,1.12) | 0.095 |
| Plac-paro-sert | 0.047 | 0.270 | 0.174 | 0.862 | (0.00,0.58) | 0.033 |
| cita-fluv-paro | 0.036 | 0.540 | 0.067 | 0.946 | (0.00,1.10) | 0.000 |
| Plac-cita-fluo | 0.035 | 0.343 | 0.103 | 0.918 | (0.00,0.71) | 0.094 |
| fluv-miln-paro | 0.034 | 0.489 | 0.071 | 0.944 | (0.00,0.99) | 0.000 |
| Plac-agom-fluo | 0.032 | 0.263 | 0.123 | 0.902 | (0.00,0.55) | 0.106 |
| amit-mirt-sert | 0.031 | 0.365 | 0.084 | 0.933 | (0.00,0.75) | 0.000 |
| Plac-fluo-venl | 0.028 | 0.185 | 0.152 | 0.879 | (0.00,0.39) | 0.089 |
| esci-fluo-paro | 0.026 | 0.277 | 0.094 | 0.925 | (0.00,0.57) | 0.001 |
| bupr-esci-venl | 0.026 | 0.365 | 0.071 | 0.944 | (0.00,0.74) | 0.000 |
| Plac-traz-venl | 0.023 | 0.452 | 0.051 | 0.959 | (0.00,0.91) | 0.047 |
| bupr-fluo-venl | 0.022 | 0.281 | 0.078 | 0.938 | (0.00,0.57) | 0.000 |
| clom-fluo-sert | 0.018 | 0.465 | 0.039 | 0.969 | (0.00,0.93) | 0.000 |
| esci-fluo-sert | 0.017 | 0.411 | 0.042 | 0.967 | (0.00,0.82) | 0.070 |
| Plac-amit-mirt | 0.015 | 0.336 | 0.046 | 0.964 | (0.00,0.67) | 0.100 |
| fluo-miln-paro | 0.015 | 0.266 | 0.055 | 0.956 | (0.00,0.54) | 0.000 |
| amit-miln-paro | 0.010 | 0.445 | 0.022 | 0.983 | (0.00,0.88) | 0.019 |
| amit-fluo-fluv | 0.008 | 0.410 | 0.021 | 0.984 | (0.00,0.81) | 0.000 |
| amit-fluo-traz | 0.003 | 0.428 | 0.007 | 0.995 | (0.00,0.84) | 0.000 |

### 7.4.2.2 Side-splitting

| Side       | Direct<br>Coef. | Std. Err. | Indirect<br>Coef. | Std. Err. | Difference<br>Coef. | Std. Err. | P> z  |
|------------|-----------------|-----------|-------------------|-----------|---------------------|-----------|-------|
| Plac agom- | .1417504        | .0990303  | -.2047001         | .1094086  | .0629497            | .1475627  | 0.670 |
| Plac amit  | -.259652        | .0996284  | .1001535          | .0849819  | -.3598056           | .1309883  | 0.006 |
| Plac bupr  | .0092913        | .0993403  | -.1479865         | .1537447  | .1572779            | .1832422  | 0.391 |
| Plac cita  | .0400299        | .1128471  | -.15235           | .1105812  | .1923799            | .1585456  | 0.225 |
| Plac clom- | .7790896        | .8380909  | .2953841          | .1301104  | -1.074474           | .8481303  | 0.205 |
| Plac dulo  | .0681872        | .0754057  | .1107586          | .105277   | -.0425714           | .1307833  | 0.745 |
| Plac esci- | .0095213        | .0779628  | -.2347466         | .0968923  | .2252254            | .1250739  | 0.072 |
| Plac fluo- | .1553179        | .0648497  | -.0947885         | .0626326  | -.0605294           | .0903839  | 0.503 |
| Plac fluv  | .0949152        | .1433244  | .102093           | .1249923  | -.0071777           | .1901941  | 0.970 |
| Plac mirt- | .0648253        | .1242582  | .0302744          | .1000767  | -.0950997           | .160317   | 0.553 |
| Plac nefa- | .1690423        | .15114    | .1023489          | .2282917  | -.2713912           | .2737707  | 0.322 |
| Plac paro- | .0266118        | .0560642  | -.0721487         | .0641619  | .0455369            | .0852774  | 0.593 |
| Plac rebo  | .0844146        | .1152656  | .2898218          | .1559599  | -.2054072           | .1945918  | 0.291 |
| Plac sert  | .063378         | .0846077  | -.1581981         | .0900008  | .2215762            | .123491   | 0.073 |
| Plac traz  | .1844915        | .1545033  | .0697202          | .1493147  | .1147713            | .2150916  | 0.594 |
| Plac venl- | .0052645        | .0769717  | .0706177          | .0754349  | -.0758822           | .1079615  | 0.482 |
| Plac vort  | .0741987        | .0888104  | -.2918756         | .1956225  | .3660744            | .217939   | 0.093 |
| agom dulo- | .1481214        | .3168311  | .2889453          | .0952119  | -.4370667           | .3308282  | 0.186 |
| agom esci  | .2448182        | .3183052  | .0559886          | .0954026  | .1888295            | .3322877  | 0.570 |
| agom fluo  | .0158028        | .1586163  | .0565966          | .0928699  | -.0407938           | .1845338  | 0.825 |
| agom paro  | .0184064        | .1460356  | .1663836          | .0929442  | -.1479773           | .1730588  | 0.393 |
| agom venl  | .7159061        | .2661728  | .1436906          | .0906823  | .5722155            | .2811986  | 0.042 |

|            |          |          |           |          |           |          |       |
|------------|----------|----------|-----------|----------|-----------|----------|-------|
| amit bupr  | .5764223 | .5488314 | -.0058267 | .1048726 | .582249   | .5587613 | 0.297 |
| amit fluo- | .4284238 | .178743  | -.0037237 | .0784072 | -.4247001 | .1951835 | 0.030 |
| amit fluv- | .2747875 | .2654016 | .2332383  | .1167896 | -.5080258 | .2899632 | 0.080 |
| amit miln- | .0309054 | .3935253 | .0144379  | .1538861 | -.0453433 | .4225395 | 0.915 |
| amit mirt  | .1472953 | .2394118 | .0255482  | .1029574 | .1217471  | .2606315 | 0.640 |
| amit paro- | .0155594 | .1329109 | .0132981  | .0811668 | -.0288574 | .1556934 | 0.853 |
| amit sert  | -.074271 | .1422772 | .0507895  | .0971334 | -.1250605 | .1723138 | 0.468 |
| amit traz- | .0157647 | .2885761 | .2164643  | .1308097 | -.232229  | .3166449 | 0.463 |
| amit venl- | .0029246 | .3316963 | .0906345  | .0821985 | -.0935591 | .3417317 | 0.784 |
| bupr esci  | .0683956 | .2317756 | -.0903197 | .1095689 | .1587154  | .2562695 | 0.536 |
| bupr fluo- | .0003371 | .1904218 | -.1121022 | .1028219 | .1117651  | .2164123 | 0.606 |
| bupr paro  | .2883557 | .4445731 | -.0222188 | .0931103 | .3105745  | .4542188 | 0.494 |
| bupr traz- | .0800427 | .4096088 | .1900265  | .1385847 | -.2700692 | .4324177 | 0.532 |
| bupr venl  | .1485547 | .2840458 | .0606486  | .1013179 | .0879061  | .3015748 | 0.771 |
| cita clom- | .4906225 | .5329733 | .3949748  | .1519771 | -.8855973 | .554218  | 0.11  |
| cita esci- | .1323977 | .1465726 | .0142948  | .1130091 | -.1466925 | .1847094 | 0.427 |
| cita fluo- | .1456367 | .2363589 | -.0535927 | .0924288 | -.092044  | .2537923 | 0.717 |
| cita fluv  | .348574  | .3711307 | .1356334  | .1245917 | .2129406  | .3914857 | 0.586 |
| cita mirt  | .8601203 | .4797164 | .008839   | .1095908 | .8512813  | .4920751 | 0.084 |
| cita paro  | .0530123 | .3429991 | .0089729  | .0891721 | .0440393  | .3552035 | 0.901 |
| cita rebo  | .4728524 | .3238006 | .1773268  | .1242521 | .2955256  | .3468219 | 0.394 |
| cita sert  | .5067421 | .2902116 | -.0418243 | .1010627 | .5485664  | .3072354 | 0.074 |
| cita venl  | 2.154652 | .8499842 | .0667774  | .0932234 | 2.087875  | .855081  | 0.015 |
| cita vila  | .1953294 | .2557092 | .1892247  | .1695264 | .0061048  | .3070547 | 0.984 |
| clom fluo- | .4212824 | .312232  | -.3879587 | .1443728 | -.0333237 | .3439786 | 0.923 |
| clom fluv  | .6359866 | .8319994 | -.200197  | .1582428 | .8361836  | .8469142 | 0.323 |
| clom paro- | .4282242 | .1687926 | -.1728656 | .191041  | -.2553585 | .2549252 | 0.316 |
| clom sert  | -.601302 | .3647615 | -.2625946 | .1484312 | -.3387074 | .3938777 | 0.390 |
| clom venl- | .0606247 | .4531709 | -.2536835 | .1419271 | .1930589  | .4748759 | 0.684 |
| desv dulo  | -.157439 | .2792424 | .0466251  | .1300133 | -.204064  | .3097438 | 0.510 |
| dulo esci- | .4784728 | .1775344 | -.1058253 | .0894518 | -.3726475 | .1987863 | 0.061 |
| dulo fluo  | .2440621 | .3230467 | -.2315906 | .0743652 | .4756527  | .3321355 | 0.152 |
| dulo paro  | .0111432 | .1305052 | -.1833732 | .0808647 | .1945164  | .1542294 | 0.207 |
| dulo venl- | .4539591 | .2208525 | .004951   | .080955  | -.4589101 | .2352208 | 0.051 |
| dulo vort- | .0347382 | .131541  | -.1109828 | .1260087 | .0762445  | .1831531 | 0.677 |
| esci fluo  | .1288183 | .2063248 | -.0460838 | .0754116 | .174902   | .2196087 | 0.426 |
| esci paro  | .1510066 | .2209788 | .0410271  | .0738005 | .1099795  | .2332714 | 0.637 |
| esci sert- | .0340373 | .25033   | .069022   | .0876949 | -.1030594 | .2653119 | 0.698 |
| esci venl  | .1061694 | .2578714 | .1344531  | .080692  | -.0282837 | .2702023 | 0.917 |
| fluo fluv  | .1432547 | .3268883 | .2312358  | .1049457 | -.0879811 | .3433256 | 0.798 |
| fluo miln  | .0830921 | .2431603 | .0794899  | .1643766 | .0036022  | .2935315 | 0.990 |
| fluo mirt  | .2943965 | .1806695 | .0697051  | .0928864 | .2246914  | .2034191 | 0.269 |
| fluo nefa  | .5708648 | .4630752 | -.0094023 | .137485  | .580267   | .4830494 | 0.230 |
| fluo paro  | .019244  | .1056897 | .0974142  | .0614584 | -.0781702 | .1221767 | 0.522 |
| fluo rebo  | .3145562 | .1837164 | .2676995  | .1153572 | .0468567  | .2173354 | 0.829 |
| fluo sert- | .1597467 | .1722636 | .1317876  | .0769326 | -.2915343 | .1886872 | 0.122 |
| fluo traz  | .4276314 | .3093663 | .222172   | .1203377 | .2054595  | .3319793 | 0.536 |
| fluo venl  | .122035  | .1074902 | .1747721  | .0752073 | -.0527371 | .1312373 | 0.688 |
| fluv miln- | .2626376 | .3621303 | -.1153561 | .1716433 | -.1472814 | .4007496 | 0.713 |
| fluv mirt  | .158668  | .2744426 | -.1613906 | .1252845 | .3200586  | .3016875 | 0.289 |
| fluv paro- | .2931033 | .3477839 | -.1322704 | .1033132 | -.1608329 | .3628044 | 0.658 |
| fluv sert- | .8551494 | .489317  | -.1027194 | .1112877 | -.75243   | .5018057 | 0.134 |
| fluv venl- | .7075923 | .4799498 | -.0332143 | .1077533 | -.6743781 | .4918969 | 0.170 |
| miln paro  | .0156181 | .2053644 | -.0170514 | .1785608 | .0326695  | .2721706 | 0.904 |
| miln sert- | .5332985 | .5840223 | .0376363  | .1493491 | -.5709348 | .6028161 | 0.344 |
| mirt paro  | .1593249 | .1844662 | -.0878227 | .0914471 | .2471475  | .2058905 | 0.230 |
| mirt sert- | .2698151 | .3224156 | -.0115051 | .0984112 | -.25831   | .3371003 | 0.444 |
| mirt traz  | .0843296 | .299112  | .142679   | .138093  | -.0583493 | .3297285 | 0.860 |
| mirt venl  | .3137912 | .2260323 | -.0083831 | .0956875 | .3221743  | .2454522 | 0.189 |
| nefa paro- | .0568818 | .3328155 | .0575481  | .1419699 | -.1144298 | .3617328 | 0.752 |
| nefa sert  | .0016964 | .4115949 | .0510046  | .1456874 | -.0493083 | .4366179 | 0.910 |
| paro rebo  | .2307754 | .1646449 | .1890859  | .1185038 | .0416895  | .2029929 | 0.837 |
| paro sert  | .135232  | .2510286 | -.0054009 | .0729908 | .1406328  | .2614221 | 0.591 |
| paro traz  | .3177554 | .3235305 | .1516761  | .1189406 | .1660793  | .3447228 | 0.630 |
| paro venl- | .2014348 | .2064662 | .1087371  | .0663071 | -.3101719 | .2169694 | 0.153 |
| sert traz- | .5618109 | .628627  | .1937958  | .122931  | -.7556067 | .6405341 | 0.238 |
| sert venl  | .1802162 | .2584007 | .0637154  | .0812185 | .1165007  | .2708656 | 0.667 |
| traz venl- | .1514985 | .3865997 | -.0856581 | .1225909 | -.0658405 | .4057546 | 0.871 |
| venl vort- | .4214359 | .2281205 | .0515964  | .1003368 | -.4730323 | .2495049 | 0.058 |

### 7.4.2.3 Design-by-treatment test

chi2(137) = 134.86

Prob > chi2 = 0.2190

## 7.4.3 Efficacy continuous

### 7.4.3.1 Loop-specific approach

Loops With Evidence of Statistical Inconsistency:

| Loop                | IF    | seIF  | z_value | p_value | CI_95       | Loop_Heterog_tau2 |
|---------------------|-------|-------|---------|---------|-------------|-------------------|
| clom-fluo-miln      | 1.015 | 0.284 | 3.570   | 0.000   | (0.46,1.57) | 0.000             |
| amit-clom-miln-sert | 0.862 | 0.292 | 2.957   | 0.003   | (0.29,1.43) | 0.000             |
| clom-fluv-miln      | 0.724 | 0.337 | 2.151   | 0.031   | (0.06,1.38) | 0.000             |
| cita-clom-fluo      | 0.590 | 0.257 | 2.293   | 0.022   | (0.09,1.09) | 0.000             |
| agom-dulo-esci      | 0.433 | 0.195 | 2.216   | 0.027   | (0.05,0.82) | 0.008             |
| agom-paro-venl      | 0.426 | 0.193 | 2.211   | 0.027   | (0.05,0.80) | 0.017             |
| Plac-cita-fluv      | 0.424 | 0.162 | 2.611   | 0.009   | (0.11,0.74) | 0.000             |
| agom-dulo-venl      | 0.357 | 0.147 | 2.424   | 0.015   | (0.07,0.65) | 0.000             |
| dulo-venl-vort      | 0.341 | 0.114 | 3.002   | 0.003   | (0.12,0.56) | 0.000             |
| Plac-dulo-esci      | 0.263 | 0.115 | 2.286   | 0.022   | (0.04,0.49) | 0.017             |
| Plac-amit-paro      | 0.245 | 0.089 | 2.748   | 0.006   | (0.07,0.42) | 0.009             |
| Plac-amit-sert      | 0.173 | 0.086 | 2.016   | 0.044   | (0.00,0.34) | 0.001             |
| Plac-cita-esci      | 0.137 | 0.063 | 2.172   | 0.030   | (0.01,0.26) | 0.000             |

Loops Without Evidence of Statistical Inconsistency:

| Loop                | IF    | seIF  | z_value | p_value | CI_95       | Loop_Heterog_tau2 |
|---------------------|-------|-------|---------|---------|-------------|-------------------|
| amit-clom-miln-venl | 0.876 | 0.545 | 1.608   | 0.108   | (0.00,1.94) | 0.053             |
| clom-miln-paro      | 0.609 | 0.415 | 1.468   | 0.142   | (0.00,1.42) | 0.038             |
| cita-clom-venl      | 0.579 | 0.329 | 1.757   | 0.079   | (0.00,1.22) | 0.000             |
| cita-clom-sert      | 0.503 | 0.336 | 1.496   | 0.135   | (0.00,1.16) | 0.017             |
| cita-clom-paro      | 0.488 | 0.521 | 0.936   | 0.349   | (0.00,1.51) | 0.070             |
| clom-fluv-sert      | 0.436 | 0.296 | 1.473   | 0.141   | (0.00,1.02) | 0.000             |
| clom-fluo-fluv      | 0.435 | 0.289 | 1.504   | 0.133   | (0.00,1.00) | 0.000             |
| cita-clom-fluv      | 0.403 | 0.328 | 1.229   | 0.219   | (0.00,1.05) | 0.000             |
| cita-mirt-sert-traz | 0.400 | 0.548 | 0.729   | 0.466   | (0.00,1.47) | 0.037             |
| cita-fluv-sert      | 0.338 | 0.330 | 1.025   | 0.305   | (0.00,0.99) | 0.023             |
| bupr-sert-traz      | 0.321 | 0.569 | 0.564   | 0.573   | (0.00,1.44) | 0.000             |
| Plac-mirt-traz      | 0.321 | 0.378 | 0.849   | 0.396   | (0.00,1.06) | 0.042             |
| amit-mirt-traz      | 0.306 | 0.277 | 1.106   | 0.269   | (0.00,0.85) | 0.000             |
| amit-fluv-venl      | 0.290 | 0.316 | 0.918   | 0.359   | (0.00,0.91) | 0.000             |
| agom-esci-paro      | 0.287 | 0.172 | 1.665   | 0.096   | (0.00,0.63) | 0.013             |
| amit-fluv-miln      | 0.284 | 0.379 | 0.749   | 0.454   | (0.00,1.03) | 0.040             |
| Plac-fluv-venl      | 0.274 | 0.291 | 0.941   | 0.346   | (0.00,0.84) | 0.007             |
| Plac-bupr-traz      | 0.272 | 0.332 | 0.820   | 0.412   | (0.00,0.92) | 0.031             |
| esci-paro-venl      | 0.262 | 0.201 | 1.305   | 0.192   | (0.00,0.66) | 0.016             |
| amit-traz-venl      | 0.259 | 0.263 | 0.985   | 0.325   | (0.00,0.77) | 0.000             |
| paro-sert-traz      | 0.253 | 0.231 | 1.096   | 0.273   | (0.00,0.70) | 0.000             |
| Plac-traz-venl      | 0.252 | 0.247 | 1.019   | 0.308   | (0.00,0.74) | 0.014             |
| cita-fluo-fluv      | 0.247 | 0.200 | 1.238   | 0.216   | (0.00,0.64) | 0.000             |
| fluv-miln-paro      | 0.245 | 0.222 | 1.102   | 0.270   | (0.00,0.68) | 0.000             |
| amit-paro-venl      | 0.245 | 0.230 | 1.064   | 0.287   | (0.00,0.70) | 0.020             |
| Plac-paro-traz      | 0.243 | 0.165 | 1.475   | 0.140   | (0.00,0.57) | 0.010             |
| cita-esci-paro      | 0.238 | 0.169 | 1.408   | 0.159   | (0.00,0.57) | 0.005             |
| Plac-amit-fluo      | 0.238 | 0.126 | 1.882   | 0.060   | (0.00,0.48) | 0.026             |
| Plac-cita-rebo      | 0.228 | 0.236 | 0.968   | 0.333   | (0.00,0.69) | 0.021             |
| mirt-paro-venl      | 0.226 | 0.326 | 0.695   | 0.487   | (0.00,0.86) | 0.057             |
| clom-fluo-paro      | 0.217 | 0.197 | 1.102   | 0.271   | (0.00,0.60) | 0.017             |
| dulo-esci-fluo      | 0.210 | 0.182 | 1.154   | 0.249   | (0.00,0.57) | 0.002             |

|                     |       |       |       |       |             |       |
|---------------------|-------|-------|-------|-------|-------------|-------|
| Plac-cita-paro      | 0.208 | 0.148 | 1.403 | 0.161 | (0.00,0.50) | 0.004 |
| Plac-dulo-vort      | 0.206 | 0.107 | 1.923 | 0.054 | (0.00,0.42) | 0.024 |
| fluo-miln-paro      | 0.205 | 0.164 | 1.254 | 0.210 | (0.00,0.53) | 0.003 |
| bupr-paro-venl      | 0.201 | 0.224 | 0.900 | 0.368 | (0.00,0.64) | 0.000 |
| fluo-paro-traz      | 0.195 | 0.237 | 0.825 | 0.409 | (0.00,0.66) | 0.010 |
| Plac-amit-traz      | 0.192 | 0.244 | 0.784 | 0.433 | (0.00,0.67) | 0.021 |
| amit-paro-traz      | 0.190 | 0.241 | 0.788 | 0.431 | (0.00,0.66) | 0.013 |
| paro-rebo-venl      | 0.187 | 0.199 | 0.939 | 0.348 | (0.00,0.58) | 0.002 |
| Plac-cita-venl      | 0.186 | 0.183 | 1.019 | 0.308 | (0.00,0.54) | 0.003 |
| Plac-amit-fluv      | 0.186 | 0.202 | 0.922 | 0.357 | (0.00,0.58) | 0.007 |
| Plac-esci-venl      | 0.182 | 0.118 | 1.547 | 0.122 | (0.00,0.41) | 0.006 |
| fluo-fluv-venl      | 0.181 | 0.285 | 0.635 | 0.525 | (0.00,0.74) | 0.000 |
| cita-fluo-mirt      | 0.175 | 0.225 | 0.778 | 0.437 | (0.00,0.62) | 0.012 |
| fluv-mirt-sert-traz | 0.173 | 0.387 | 0.446 | 0.656 | (0.00,0.93) | 0.014 |
| Plac-cita-mirt      | 0.172 | 0.163 | 1.054 | 0.292 | (0.00,0.49) | 0.004 |
| Plac-amit-mirt      | 0.168 | 0.176 | 0.956 | 0.339 | (0.00,0.51) | 0.023 |
| agom-fluo-venl      | 0.168 | 0.113 | 1.488 | 0.137 | (0.00,0.39) | 0.003 |
| amit-fluv-mirt      | 0.167 | 0.249 | 0.671 | 0.502 | (0.00,0.66) | 0.012 |
| Plac-amit-venl      | 0.166 | 0.160 | 1.038 | 0.299 | (0.00,0.48) | 0.009 |
| clom-paro-sert      | 0.166 | 0.310 | 0.535 | 0.593 | (0.00,0.77) | 0.040 |
| dulo-esci-paro      | 0.165 | 0.130 | 1.277 | 0.202 | (0.00,0.42) | 0.009 |
| Plac-paro-venl      | 0.165 | 0.111 | 1.485 | 0.138 | (0.00,0.38) | 0.006 |
| Plac-fluv-paro      | 0.165 | 0.198 | 0.831 | 0.406 | (0.00,0.55) | 0.006 |
| fluo-traz-venl      | 0.164 | 0.266 | 0.616 | 0.538 | (0.00,0.68) | 0.006 |
| fluo-nefa-paro      | 0.164 | 0.214 | 0.765 | 0.444 | (0.00,0.58) | 0.002 |
| Plac-fluo-traz      | 0.163 | 0.283 | 0.574 | 0.566 | (0.00,0.72) | 0.035 |
| Plac-nefa-paro      | 0.161 | 0.170 | 0.947 | 0.344 | (0.00,0.50) | 0.007 |
| fluo-fluv-sert      | 0.157 | 0.205 | 0.766 | 0.444 | (0.00,0.56) | 0.000 |
| clom-fluo-sert      | 0.156 | 0.199 | 0.785 | 0.432 | (0.00,0.55) | 0.000 |
| cita-esci-fluo      | 0.155 | 0.119 | 1.302 | 0.193 | (0.00,0.39) | 0.001 |
| cita-paro-sert      | 0.150 | 0.286 | 0.524 | 0.601 | (0.00,0.71) | 0.018 |
| fluo-mirt-paro      | 0.147 | 0.176 | 0.840 | 0.401 | (0.00,0.49) | 0.022 |
| fluo-sert-traz      | 0.146 | 0.270 | 0.540 | 0.589 | (0.00,0.67) | 0.002 |
| fluo-fluv-miln      | 0.144 | 0.221 | 0.652 | 0.514 | (0.00,0.58) | 0.000 |
| Plac-agom-venl      | 0.144 | 0.131 | 1.101 | 0.271 | (0.00,0.40) | 0.013 |
| cita-esci-sert      | 0.144 | 0.148 | 0.972 | 0.331 | (0.00,0.43) | 0.006 |
| bupr-fluo-venl      | 0.144 | 0.162 | 0.889 | 0.374 | (0.00,0.46) | 0.004 |
| fluo-paro-sert      | 0.141 | 0.121 | 1.162 | 0.245 | (0.00,0.38) | 0.001 |
| clom-fluv-paro      | 0.138 | 0.394 | 0.350 | 0.727 | (0.00,0.91) | 0.049 |
| mirt-paro-traz      | 0.137 | 0.442 | 0.311 | 0.756 | (0.00,1.00) | 0.072 |
| cita-fluo-rebo      | 0.137 | 0.203 | 0.673 | 0.501 | (0.00,0.54) | 0.010 |
| esci-fluo-venl      | 0.133 | 0.125 | 1.061 | 0.289 | (0.00,0.38) | 0.001 |
| cita-esci-venl      | 0.132 | 0.214 | 0.619 | 0.536 | (0.00,0.55) | 0.005 |
| Plac-fluv-mirt      | 0.132 | 0.201 | 0.658 | 0.511 | (0.00,0.53) | 0.022 |
| fluv-paro-sert      | 0.130 | 0.238 | 0.547 | 0.585 | (0.00,0.60) | 0.000 |
| cita-mirt-paro      | 0.130 | 0.524 | 0.248 | 0.804 | (0.00,1.16) | 0.099 |
| Plac-desv-dulo      | 0.129 | 0.190 | 0.678 | 0.498 | (0.00,0.50) | 0.018 |
| Plac-bupr-venl      | 0.129 | 0.187 | 0.691 | 0.489 | (0.00,0.49) | 0.014 |
| cita-paro-venl      | 0.129 | 0.223 | 0.578 | 0.563 | (0.00,0.57) | 0.000 |
| bupr-paro-sert      | 0.126 | 0.540 | 0.233 | 0.816 | (0.00,1.18) | 0.000 |
| agom-fluo-paro      | 0.125 | 0.108 | 1.164 | 0.245 | (0.00,0.34) | 0.009 |
| clom-fluo-venl      | 0.123 | 0.250 | 0.491 | 0.624 | (0.00,0.61) | 0.000 |
| agom-esci-fluo      | 0.122 | 0.131 | 0.934 | 0.350 | (0.00,0.38) | 0.001 |
| dulo-fluo-venl      | 0.119 | 0.167 | 0.714 | 0.475 | (0.00,0.45) | 0.000 |
| amit-fluo-mirt      | 0.119 | 0.180 | 0.658 | 0.510 | (0.00,0.47) | 0.011 |
| Plac-agom-paro      | 0.118 | 0.091 | 1.295 | 0.195 | (0.00,0.30) | 0.013 |
| Plac-agom-dulo      | 0.116 | 0.208 | 0.560 | 0.575 | (0.00,0.52) | 0.028 |
| cita-fluo-venl      | 0.115 | 0.190 | 0.606 | 0.545 | (0.00,0.49) | 0.001 |
| Plac-fluo-fluv      | 0.113 | 0.221 | 0.510 | 0.610 | (0.00,0.55) | 0.028 |
| agom-esci-venl      | 0.108 | 0.177 | 0.610 | 0.542 | (0.00,0.46) | 0.005 |
| fluo-paro-venl      | 0.107 | 0.117 | 0.921 | 0.357 | (0.00,0.34) | 0.004 |
| amit-fluv-paro      | 0.105 | 0.285 | 0.369 | 0.712 | (0.00,0.66) | 0.016 |
| fluo-fluv-paro      | 0.103 | 0.216 | 0.475 | 0.635 | (0.00,0.53) | 0.003 |
| cita-fluv-mirt      | 0.102 | 0.208 | 0.490 | 0.624 | (0.00,0.51) | 0.000 |
| cita-fluo-paro      | 0.101 | 0.177 | 0.573 | 0.567 | (0.00,0.45) | 0.005 |
| Plac-dulo-venl      | 0.098 | 0.139 | 0.701 | 0.483 | (0.00,0.37) | 0.019 |
| Plac-venl-vort      | 0.097 | 0.152 | 0.640 | 0.522 | (0.00,0.39) | 0.025 |
| amit-fluo-sert      | 0.096 | 0.116 | 0.821 | 0.411 | (0.00,0.32) | 0.000 |
| amit-cita-mirt-sert | 0.095 | 0.189 | 0.500 | 0.617 | (0.00,0.47) | 0.000 |
| Plac-esci-paro      | 0.094 | 0.087 | 1.073 | 0.283 | (0.00,0.26) | 0.006 |
| amit-sert-venl      | 0.092 | 0.176 | 0.523 | 0.601 | (0.00,0.44) | 0.000 |
| bupr-fluo-traz      | 0.091 | 0.499 | 0.182 | 0.856 | (0.00,1.07) | 0.050 |
| esci-paro-sert      | 0.084 | 0.139 | 0.601 | 0.548 | (0.00,0.36) | 0.002 |
| Plac-fluo-mirt      | 0.083 | 0.170 | 0.487 | 0.626 | (0.00,0.42) | 0.031 |
| amit-fluo-traz      | 0.082 | 0.309 | 0.265 | 0.791 | (0.00,0.69) | 0.022 |
| Plac-cita-sert      | 0.081 | 0.096 | 0.847 | 0.397 | (0.00,0.27) | 0.000 |
| agom-dulo-fluo      | 0.079 | 0.203 | 0.390 | 0.697 | (0.00,0.48) | 0.005 |



|                |       |       |       |       |             |       |
|----------------|-------|-------|-------|-------|-------------|-------|
| Plac-bupr-paro | 0.079 | 0.221 | 0.358 | 0.720 | (0.00,0.51) | 0.012 |
| amit-fluo-fluv | 0.079 | 0.221 | 0.358 | 0.720 | (0.00,0.51) | 0.004 |
| Plac-agom-esci | 0.075 | 0.132 | 0.563 | 0.573 | (0.00,0.33) | 0.010 |
| amit-fluo-miln | 0.074 | 0.288 | 0.257 | 0.797 | (0.00,0.64) | 0.023 |
| Plac-sert-venl | 0.073 | 0.132 | 0.550 | 0.583 | (0.00,0.33) | 0.004 |
| fluv-mirt-paro | 0.072 | 0.357 | 0.202 | 0.840 | (0.00,0.77) | 0.065 |
| fluo-mirt-venl | 0.068 | 0.146 | 0.464 | 0.642 | (0.00,0.35) | 0.004 |
| nefa-paro-sert | 0.064 | 0.229 | 0.278 | 0.781 | (0.00,0.51) | 0.000 |
| clom-paro-venl | 0.063 | 0.439 | 0.143 | 0.886 | (0.00,0.92) | 0.057 |
| esci-fluo-sert | 0.062 | 0.127 | 0.485 | 0.628 | (0.00,0.31) | 0.000 |
| Plac-sert-traz | 0.061 | 0.219 | 0.277 | 0.781 | (0.00,0.49) | 0.007 |
| clom-sert-venl | 0.059 | 0.302 | 0.196 | 0.845 | (0.00,0.65) | 0.011 |
| amit-fluo-paro | 0.059 | 0.120 | 0.491 | 0.623 | (0.00,0.29) | 0.010 |
| Plac-esci-sert | 0.059 | 0.092 | 0.635 | 0.525 | (0.00,0.24) | 0.000 |
| bupr-paro-traz | 0.058 | 0.281 | 0.205 | 0.838 | (0.00,0.61) | 0.000 |
| amit-miln-paro | 0.058 | 0.236 | 0.244 | 0.807 | (0.00,0.52) | 0.017 |
| cita-fluo-sert | 0.057 | 0.133 | 0.428 | 0.669 | (0.00,0.32) | 0.000 |
| Plac-cita-fluo | 0.056 | 0.154 | 0.363 | 0.717 | (0.00,0.36) | 0.020 |
| bupr-fluo-sert | 0.054 | 0.514 | 0.105 | 0.916 | (0.00,1.06) | 0.000 |
| bupr-sert-venl | 0.052 | 0.528 | 0.099 | 0.921 | (0.00,1.09) | 0.000 |
| Plac-paro-sert | 0.051 | 0.108 | 0.473 | 0.636 | (0.00,0.26) | 0.004 |
| fluo-paro-rebo | 0.049 | 0.116 | 0.420 | 0.674 | (0.00,0.28) | 0.005 |
| amit-fluo-venl | 0.048 | 0.157 | 0.304 | 0.761 | (0.00,0.36) | 0.003 |
| amit-paro-sert | 0.047 | 0.129 | 0.366 | 0.714 | (0.00,0.30) | 0.003 |
| Plac-fluo-rebo | 0.047 | 0.170 | 0.278 | 0.781 | (0.00,0.38) | 0.036 |
| fluo-fluv-mirt | 0.047 | 0.238 | 0.197 | 0.844 | (0.00,0.51) | 0.018 |
| cita-fluv-paro | 0.046 | 0.246 | 0.188 | 0.851 | (0.00,0.53) | 0.000 |
| Plac-nefa-sert | 0.046 | 0.183 | 0.252 | 0.801 | (0.00,0.40) | 0.000 |
| bupr-fluo-paro | 0.045 | 0.225 | 0.201 | 0.840 | (0.00,0.49) | 0.009 |
| dulo-paro-venl | 0.045 | 0.152 | 0.298 | 0.766 | (0.00,0.34) | 0.006 |
| cita-fluv-venl | 0.045 | 0.332 | 0.136 | 0.892 | (0.00,0.70) | 0.000 |
| Plac-fluo-paro | 0.045 | 0.077 | 0.580 | 0.562 | (0.00,0.20) | 0.018 |
| esci-sert-venl | 0.043 | 0.193 | 0.221 | 0.825 | (0.00,0.42) | 0.007 |
| Plac-fluo-nefa | 0.042 | 0.220 | 0.193 | 0.847 | (0.00,0.47) | 0.028 |
| Plac-agom-fluo | 0.041 | 0.125 | 0.328 | 0.743 | (0.00,0.29) | 0.027 |
| fluo-nefa-sert | 0.040 | 0.240 | 0.169 | 0.866 | (0.00,0.51) | 0.000 |
| cita-mirt-venl | 0.040 | 0.224 | 0.180 | 0.857 | (0.00,0.48) | 0.000 |
| dulo-esci-venl | 0.039 | 0.171 | 0.228 | 0.819 | (0.00,0.37) | 0.009 |
| cita-rebo-venl | 0.039 | 0.252 | 0.153 | 0.878 | (0.00,0.53) | 0.000 |
| dulo-fluo-paro | 0.038 | 0.170 | 0.224 | 0.823 | (0.00,0.37) | 0.005 |
| Plac-bupr-esci | 0.037 | 0.137 | 0.268 | 0.788 | (0.00,0.31) | 0.012 |
| fluo-rebo-venl | 0.034 | 0.189 | 0.181 | 0.857 | (0.00,0.41) | 0.004 |
| Plac-mirt-paro | 0.032 | 0.132 | 0.243 | 0.808 | (0.00,0.29) | 0.014 |
| Plac-fluo-venl | 0.030 | 0.082 | 0.372 | 0.710 | (0.00,0.19) | 0.018 |
| Plac-esci-fluo | 0.030 | 0.125 | 0.240 | 0.810 | (0.00,0.28) | 0.018 |
| fluo-sert-venl | 0.029 | 0.136 | 0.213 | 0.831 | (0.00,0.30) | 0.000 |
| Plac-mirt-venl | 0.024 | 0.151 | 0.161 | 0.872 | (0.00,0.32) | 0.013 |
| Plac-fluo-sert | 0.024 | 0.111 | 0.217 | 0.828 | (0.00,0.24) | 0.018 |
| bupr-esci-sert | 0.023 | 0.518 | 0.044 | 0.965 | (0.00,1.04) | 0.000 |
| bupr-esci-paro | 0.022 | 0.234 | 0.093 | 0.926 | (0.00,0.48) | 0.007 |
| amit-mirt-venl | 0.021 | 0.208 | 0.102 | 0.919 | (0.00,0.43) | 0.007 |
| Plac-dulo-paro | 0.020 | 0.086 | 0.236 | 0.813 | (0.00,0.19) | 0.016 |
| Plac-paro-rebo | 0.020 | 0.125 | 0.161 | 0.872 | (0.00,0.26) | 0.016 |
| esci-fluo-paro | 0.020 | 0.119 | 0.165 | 0.869 | (0.00,0.25) | 0.005 |
| amit-sert-traz | 0.019 | 0.247 | 0.078 | 0.938 | (0.00,0.50) | 0.000 |
| agom-dulo-paro | 0.018 | 0.175 | 0.100 | 0.920 | (0.00,0.36) | 0.011 |
| amit-mirt-paro | 0.015 | 0.216 | 0.070 | 0.944 | (0.00,0.44) | 0.036 |
| bupr-esci-venl | 0.015 | 0.208 | 0.072 | 0.943 | (0.00,0.42) | 0.007 |
| amit-fluv-sert | 0.015 | 0.215 | 0.069 | 0.945 | (0.00,0.44) | 0.000 |
| cita-paro-rebo | 0.014 | 0.176 | 0.079 | 0.937 | (0.00,0.36) | 0.000 |
| Plac-dulo-fluo | 0.013 | 0.215 | 0.062 | 0.951 | (0.00,0.43) | 0.033 |
| Plac-bupr-sert | 0.011 | 0.525 | 0.021 | 0.984 | (0.00,1.04) | 0.010 |
| Plac-cita-vila | 0.008 | 0.135 | 0.058 | 0.954 | (0.00,0.27) | 0.013 |
| Plac-bupr-fluo | 0.006 | 0.163 | 0.040 | 0.968 | (0.00,0.33) | 0.032 |
| fluo-mirt-traz | 0.006 | 0.460 | 0.013 | 0.989 | (0.00,0.91) | 0.058 |
| Plac-fluv-sert | 0.005 | 0.175 | 0.031 | 0.975 | (0.00,0.35) | 0.000 |
| bupr-esci-fluo | 0.004 | 0.157 | 0.026 | 0.979 | (0.00,0.31) | 0.004 |
| cita-sert-venl | 0.004 | 0.384 | 0.010 | 0.992 | (0.00,0.76) | 0.038 |
| Plac-rebo-venl | 0.003 | 0.259 | 0.013 | 0.990 | (0.00,0.51) | 0.023 |

### 7.4.3.2 Side-splitting

| Side       | Direct   |           | Indirect  |           | Difference |           | P> z  |
|------------|----------|-----------|-----------|-----------|------------|-----------|-------|
|            | Coef.    | Std. Err. | Coef.     | Std. Err. | Coef.      | Std. Err. |       |
| Plac agom- | .2512808 | .0459306  | -.2660282 | .0514991  | .0147474   | .0690935  | 0.831 |
| Plac amit- | .6103598 | .0519063  | -.3732179 | .043578   | -.2371419  | .0677481  | 0.000 |
| Plac bupr- | .2024932 | .0497705  | -.3410445 | .0824924  | .1385513   | .0962711  | 0.150 |
| Plac cita- | .2098557 | .0507747  | -.2640504 | .0462435  | .0541946   | .0688042  | 0.431 |
| Plac dulo  | -.375099 | .0383956  | -.3658008 | .0518621  | -.0092981  | .0650107  | 0.886 |
| Plac esci- | .2150141 | .0373355  | -.3857045 | .0418394  | .1706904   | .0562674  | 0.002 |
| Plac fluo- | .2087802 | .0315559  | -.2427501 | .0311074  | .0339699   | .0443257  | 0.443 |
| Plac fluv- | .4378883 | .098869   | -.2742997 | .0604566  | -.1635886  | .1159017  | 0.158 |
| Plac mirt- | .3637403 | .0683478  | -.3603649 | .0543432  | -.0033754  | .0873718  | 0.969 |
| Plac nefa- | .3026198 | .0781393  | -.2264457 | .1031057  | -.076174   | .1293746  | 0.556 |
| Plac paro- | .2929862 | .0291566  | -.3493622 | .032029   | .056376    | .0433307  | 0.193 |
| Plac rebo- | .1714061 | .0604265  | -.1395756 | .0733     | -.0318305  | .0949709  | 0.738 |
| Plac sert- | .2721599 | .045185   | -.2708246 | .0437179  | -.0013353  | .0628841  | 0.983 |
| Plac traz- | .3486727 | .0814432  | -.2014595 | .0825684  | -.1472132  | .115877   | 0.204 |
| Plac venl  | -.336268 | .0371874  | -.3245724 | .0368772  | -.0116956  | .0523786  | 0.823 |
| Plac vort- | .3014117 | .0416346  | -.1612856 | .097015   | -.1401262  | .1065828  | 0.189 |
| agom dulo  | -.237261 | .1513232  | -.1026529 | .0458873  | -.1346081  | .1581276  | 0.395 |
| agom esci  | .1119963 | .1271535  | -.0508843 | .0445176  | .1628806   | .134717   | 0.227 |
| agom fluo- | .0017993 | .0752683  | .043039   | .0435064  | -.0448383  | .0870529  | 0.607 |
| agom paro  | -.160856 | .071295   | -.0234497 | .0435325  | -.1374064  | .0835343  | 0.100 |
| agom venl  | .0602802 | .1144701  | -.0914764 | .043244   | .1517565   | .1223642  | 0.215 |
| amit fluo  | .1704286 | .0873593  | .2619879  | .040509   | -.0915594  | .0962961  | 0.342 |
| amit fluv  | -.021912 | .1818389  | .1729215  | .0614824  | -.1948335  | .1919517  | 0.310 |
| amit miln  | .0846067 | .1650324  | .1978638  | .082096   | -.113257   | .1843328  | 0.539 |
| amit mirt  | .0811044 | .1187676  | .1166636  | .0562391  | -.0355592  | .1314063  | 0.787 |
| amit paro  | .0723168 | .0685035  | .1832981  | .0417883  | -.1109813  | .0802468  | 0.167 |
| amit sert  | .1876655 | .0732317  | .2062233  | .0497213  | -.0185578  | .0885043  | 0.834 |
| amit traz  | .0726626 | .176609   | .2146241  | .0693656  | -.1419615  | .1897242  | 0.454 |
| amit venl  | .109774  | .147427   | .1440288  | .0418692  | -.0342549  | .153257   | 0.823 |
| bupr esci- | .0525734 | .1188586  | -.0509015 | .0543524  | -.0016719  | .1306898  | 0.990 |
| bupr fluo- | .0157645 | .1023828  | .021155   | .051824   | -.0369195  | .1146863  | 0.748 |
| bupr paro- | .0140928 | .2082742  | -.0824246 | .0479194  | .0683318   | .2137157  | 0.749 |
| bupr sert- | .0629887 | .5168931  | -.0315514 | .0523925  | -.0314373  | .5195416  | 0.952 |
| bupr traz  | .1271639 | .2220119  | -.0545544 | .0736182  | .1817183   | .2338994  | 0.437 |
| bupr venl- | .0013175 | .1594447  | -.099801  | .0508484  | .0984835   | .1673564  | 0.556 |
| cita clom  | -.37479  | .2300268  | -.0595383 | .0705494  | -.3152517  | .2406025  | 0.190 |
| cita esci- | .1302309 | .0557588  | .0155008  | .051377   | -.1457316  | .0757714  | 0.054 |
| cita fluo  | .0536987 | .1145703  | .0084047  | .040552   | .045294    | .1215348  | 0.709 |
| cita fluv  | .1855169 | .1772178  | -.112525  | .0626899  | .2980419   | .1879792  | 0.113 |
| cita mirt  | .0202473 | .167092   | -.1375008 | .0547901  | .1577481   | .1758457  | 0.370 |
| cita paro  | .1194218 | .167554   | -.0904116 | .0395137  | .2098333   | .1723919  | 0.224 |
| cita rebo  | .2558837 | .1601036  | .0573587  | .0589473  | .198525    | .1706105  | 0.245 |
| cita sert  | .0355478 | .1142018  | -.0434445 | .047032   | .0789923   | .1235181  | 0.522 |
| cita venl  | .0658867 | .2002698  | -.0977906 | .0421119  | .1636774   | .2046495  | 0.424 |
| cita vila  | -.034457 | .1100089  | -.0254496 | .0752578  | -.0090074  | .133315   | 0.946 |
| clom fluo- | .1596859 | .1586681  | .1471659  | .0675902  | -.3068518  | .1724635  | 0.075 |
| clom fluv  | .1574758 | .2355193  | -.0100022 | .0799784  | .167478    | .2487286  | 0.501 |
| clom miln  | .6887981 | .2416763  | -.0678511 | .09298    | .7566492   | .2589454  | 0.003 |
| clom paro  | .006088  | .0870943  | .0090016  | .083562   | -.0029136  | .1207017  | 0.981 |
| clom sert- | .0885061 | .1497974  | .087926   | .0721373  | -.1764322  | .1662697  | 0.289 |
| clom venl- | .1378382 | .2334831  | .0068743  | .0670299  | -.1447125  | .2429143  | 0.551 |
| desv dulo- | .0278205 | .1506692  | -.1426767 | .0614205  | .1148563   | .163147   | 0.481 |
| dulo esci  | -.091101 | .0902523  | .1197651  | .0428972  | -.2108661  | .0999293  | 0.035 |
| dulo fluo  | .143706  | .1638625  | .1458712  | .0372474  | -.0021652  | .16835    | 0.990 |
| dulo paro  | .0919989 | .0628171  | .0360679  | .041534   | .0559311   | .0755905  | 0.459 |
| dulo venl- | .0593003 | .1089809  | .0553195  | .0404329  | -.1146198  | .1162357  | 0.324 |
| dulo vort  | .2003974 | .0640412  | -.0011567 | .0599429  | .2015541   | .0880397  | 0.022 |
| esci fluo  | .0255431 | .0987587  | .069917   | .0354663  | -.0443739  | .1049367  | 0.672 |
| esci paro  | .0125007 | .0897985  | -.0341039 | .0355654  | .0466046   | .0966372  | 0.630 |
| esci sert  | .0147888 | .1050175  | .0201744  | .0429075  | -.0053856  | .1134523  | 0.962 |
| esci venl  | .0700348 | .1224274  | -.0500007 | .0379761  | .1200355   | .1281963  | 0.349 |
| fluo fluv- | .1095842 | .1478212  | -.0903056 | .0575448  | -.0192786  | .158625   | 0.903 |
| fluo miln- | .1652954 | .1686345  | -.0499987 | .0782099  | -.1152966  | .1858881  | 0.535 |
| fluo mirt- | .2110616 | .1090864  | -.1201967 | .0493536  | -.0908649  | .1197584  | 0.448 |
| fluo nefa- | .0418493 | .1723411  | -.0499643 | .0698117  | .008115    | .1859457  | 0.965 |
| fluo paro- | .0440312 | .054283   | -.1080671 | .0306567  | .0640359   | .0623394  | 0.304 |
| fluo rebo  | .0633928 | .0938962  | .0690271  | .0573141  | -.0056348  | .1099872  | 0.959 |
| fluo sert- | .0863324 | .0846608  | -.0368474 | .0387958  | -.049485   | .0931402  | 0.595 |
| fluo traz- | .0369502 | .1933362  | -.05157   | .063679   | .0146198   | .2035894  | 0.943 |
| fluo venl- | .1317808 | .0524652  | -.0909532 | .0366298  | -.0408276  | .0639789  | 0.523 |

|            |          |          |           |          |           |          |       |
|------------|----------|----------|-----------|----------|-----------|----------|-------|
| fluv miln- | .1917567 | .1586241 | .0944508  | .0918993 | -.2862075 | .1833224 | 0.118 |
| fluv mirt- | .0640723 | .1282119 | -.036494  | .0698865 | -.0275783 | .1460215 | 0.850 |
| fluv paro- | .0104914 | .1826039 | .0012551  | .0559455 | -.0117465 | .190985  | 0.951 |
| fluv sert  | .1948878 | .171668  | .0287214  | .0611204 | .1661664  | .1822251 | 0.362 |
| fluv venl- | .1647263 | .2789115 | -.0049965 | .0573374 | -.1597299 | .2847441 | 0.575 |
| miln paro- | .0658516 | .1052015 | .0115019  | .0924334 | -.0773535 | .1400403 | 0.581 |
| mirt paro  | .0394475 | .1000604 | .0439373  | .0499147 | -.0044898 | .1118342 | 0.968 |
| mirt traz  | .3008748 | .23366   | .0643191  | .073306  | .2365557  | .2449005 | 0.334 |
| mirt venl  | .0052397 | .1218664 | .035896   | .051105  | -.0306563 | .1321482 | 0.817 |
| nefa paro- | .1537458 | .1612114 | -.0228335 | .0703625 | -.1309123 | .1758773 | 0.457 |
| nefa sert  | 2.67e-08 | .2026366 | .0037946  | .0722005 | -.0037945 | .2151151 | 0.986 |
| paro rebo  | .1506427 | .0869293 | .164429   | .0587844 | -.0137863 | .1049623 | 0.896 |
| paro sert  | .0658566 | .1194948 | .0453614  | .037182  | .0204952  | .1251588 | 0.870 |
| paro traz  | .1899164 | .1398435 | .0094342  | .0661789 | .1804823  | .1547145 | 0.243 |
| paro venl- | .1883823 | .1180784 | .0017336  | .0325076 | -.1901159 | .1225212 | 0.121 |
| rebo venl- | .1513165 | .1927701 | -.1734378 | .0536946 | .0221213  | .2001085 | 0.912 |
| sert traz- | .1307871 | .2149651 | .0075863  | .0670861 | -.1383735 | .22519   | 0.539 |
| sert venl  | .0093448 | .1387856 | -.0646365 | .0402715 | .0739813  | .1445103 | 0.609 |
| traz venl- | .2272443 | .2064317 | -.0366811 | .0653753 | -.1905633 | .2167323 | 0.379 |
| venl vort- | .0864418 | .1102267 | .0779534  | .0480877 | -.1643952 | .1204024 | 0.172 |

### 7.4.3.3 Design-by-treatment test

$$\text{chi2}(134) = 106.50$$

$$\text{Prob} > \text{chi2} = 0.7872$$

## 7.4.4 Remission

### 7.4.4.1 Loop-specific approach

Loops With Evidence of Statistical Inconsistency:

| Loop           | IF    | seIF  | z_value | p_value | CI_95        | Loop_Heterog_tau2 |
|----------------|-------|-------|---------|---------|--------------|-------------------|
| cita-clom-venl | 2.334 | 0.710 | 3.288   | 0.001   | (0.94, 3.73) | 0.000             |
| cita-clom-fluo | 1.707 | 0.493 | 3.464   | 0.001   | (0.74, 2.67) | 0.000             |
| cita-clom-sert | 1.332 | 0.573 | 2.323   | 0.020   | (0.21, 2.46) | 0.031             |
| cita-esci-venl | 1.230 | 0.596 | 2.063   | 0.039   | (0.06, 2.40) | 0.140             |
| clom-fluo-miln | 1.108 | 0.543 | 2.041   | 0.041   | (0.04, 2.17) | 0.000             |
| Plac-cita-venl | 1.039 | 0.350 | 2.970   | 0.003   | (0.35, 1.73) | 0.000             |
| agom-dulo-venl | 1.006 | 0.326 | 3.090   | 0.002   | (0.37, 1.64) | 0.000             |
| agom-dulo-esci | 0.862 | 0.404 | 2.132   | 0.033   | (0.07, 1.65) | 0.028             |
| cita-fluo-venl | 0.823 | 0.387 | 2.126   | 0.034   | (0.06, 1.58) | 0.007             |
| Plac-bupr-venl | 0.674 | 0.261 | 2.585   | 0.010   | (0.16, 1.19) | 0.000             |
| Plac-agom-venl | 0.587 | 0.216 | 2.719   | 0.007   | (0.16, 1.01) | 0.005             |
| Plac-amit-fluo | 0.518 | 0.229 | 2.260   | 0.024   | (0.07, 0.97) | 0.066             |
| Plac-amit-paro | 0.450 | 0.162 | 2.787   | 0.005   | (0.13, 0.77) | 0.000             |

Loops Without Evidence of Statistical Inconsistency:

| Loop           | IF    | seIF  | z_value | p_value | CI_95        | Loop_Heterog_tau2 |
|----------------|-------|-------|---------|---------|--------------|-------------------|
| cita-clom-paro | 1.534 | 0.947 | 1.620   | 0.105   | (0.00, 3.39) | 0.206             |
| cita-clom-fluv | 1.444 | 0.783 | 1.846   | 0.065   | (0.00, 2.98) | 0.000             |
| bupr-sert-traz | 1.428 | 1.218 | 1.173   | 0.241   | (0.00, 3.82) | 0.000             |
| cita-sert-venl | 1.159 | 0.675 | 1.717   | 0.086   | (0.00, 2.48) | 0.189             |
| cita-paro-venl | 1.101 | 0.840 | 1.312   | 0.190   | (0.00, 2.75) | 0.185             |
| agom-paro-venl | 1.082 | 0.565 | 1.915   | 0.056   | (0.00, 2.19) | 0.158             |
| cita-fluv-sert | 1.032 | 0.743 | 1.389   | 0.165   | (0.00, 2.49) | 0.111             |
| clom-fluo-fluv | 0.959 | 0.604 | 1.588   | 0.112   | (0.00, 2.14) | 0.000             |
| bupr-paro-venl | 0.943 | 0.735 | 1.283   | 0.199   | (0.00, 2.38) | 0.107             |
| clom-fluv-sert | 0.906 | 0.649 | 1.397   | 0.162   | (0.00, 2.18) | 0.000             |
| bupr-sert-venl | 0.889 | 1.288 | 0.691   | 0.490   | (0.00, 3.41) | 0.157             |

|       |                |       |       |       |       |             |       |
|-------|----------------|-------|-------|-------|-------|-------------|-------|
|       | fluo-traz-venl | 0.855 | 0.570 | 1.500 | 0.134 | (0.00,1.97) | 0.000 |
|       | fluv-mirt-venl | 0.841 | 0.515 | 1.632 | 0.103 | (0.00,1.85) | 0.000 |
|       | Plac-cita-fluv | 0.834 | 0.492 | 1.694 | 0.090 | (0.00,1.80) | 0.000 |
|       | mirt-sert-traz | 0.831 | 0.754 | 1.101 | 0.271 | (0.00,2.31) | 0.000 |
|       | cita-fluv-venl | 0.797 | 0.700 | 1.138 | 0.255 | (0.00,2.17) | 0.000 |
|       | Plac-bupr-traz | 0.737 | 0.440 | 1.675 | 0.094 | (0.00,1.60) | 0.011 |
|       | paro-sert-traz | 0.720 | 0.478 | 1.507 | 0.132 | (0.00,1.66) | 0.000 |
|       | cita-mirt-venl | 0.706 | 0.733 | 0.963 | 0.335 | (0.00,2.14) | 0.102 |
|       | bupr-fluo-traz | 0.699 | 0.503 | 1.390 | 0.165 | (0.00,1.68) | 0.000 |
|       | cita-fluo-fluv | 0.696 | 0.536 | 1.298 | 0.194 | (0.00,1.75) | 0.000 |
|       | paro-rebo-venl | 0.695 | 0.520 | 1.338 | 0.181 | (0.00,1.71) | 0.042 |
|       | fluo-fluv-venl | 0.692 | 0.500 | 1.383 | 0.167 | (0.00,1.67) | 0.000 |
|       | cita-fluv-mirt | 0.674 | 0.551 | 1.222 | 0.222 | (0.00,1.75) | 0.000 |
|       | Plac-traz-venl | 0.668 | 0.514 | 1.299 | 0.194 | (0.00,1.68) | 0.000 |
|       | cita-esci-paro | 0.609 | 0.543 | 1.120 | 0.263 | (0.00,1.67) | 0.110 |
|       | Plac-fluv-venl | 0.591 | 0.471 | 1.255 | 0.209 | (0.00,1.51) | 0.000 |
|       | agom-esci-paro | 0.569 | 0.519 | 1.096 | 0.273 | (0.00,1.59) | 0.121 |
|       | fluo-sert-traz | 0.535 | 0.480 | 1.115 | 0.265 | (0.00,1.47) | 0.000 |
|       | Plac-sert-traz | 0.535 | 0.582 | 0.919 | 0.358 | (0.00,1.68) | 0.106 |
|       | amit-traz-venl | 0.528 | 0.613 | 0.862 | 0.389 | (0.00,1.73) | 0.000 |
|       | amit-fluo-miln | 0.526 | 0.499 | 1.055 | 0.292 | (0.00,1.50) | 0.000 |
|       | bupr-esci-venl | 0.514 | 0.427 | 1.203 | 0.229 | (0.00,1.35) | 0.029 |
|       | cita-esci-sert | 0.507 | 0.513 | 0.987 | 0.324 | (0.00,1.51) | 0.143 |
|       | amit-fluv-venl | 0.502 | 0.649 | 0.773 | 0.439 | (0.00,1.77) | 0.043 |
|       | dulo-esci-fluo | 0.484 | 0.456 | 1.063 | 0.288 | (0.00,1.38) | 0.062 |
|       | amit-sert-traz | 0.476 | 0.679 | 0.701 | 0.483 | (0.00,1.81) | 0.097 |
|       | bupr-paro-traz | 0.474 | 0.593 | 0.800 | 0.424 | (0.00,1.64) | 0.000 |
|       | clom-fluo-paro | 0.468 | 0.350 | 1.336 | 0.181 | (0.00,1.15) | 0.064 |
|       | dulo-venl-vort | 0.461 | 0.329 | 1.402 | 0.161 | (0.00,1.11) | 0.045 |
|       | Plac-nefa-paro | 0.461 | 0.383 | 1.205 | 0.228 | (0.00,1.21) | 0.000 |
|       | dulo-fluo-venl | 0.459 | 0.353 | 1.299 | 0.194 | (0.00,1.15) | 0.000 |
|       | Plac-rebo-venl | 0.459 | 0.385 | 1.191 | 0.234 | (0.00,1.21) | 0.005 |
|       | cita-esci-fluo | 0.453 | 0.434 | 1.043 | 0.297 | (0.00,1.30) | 0.127 |
|       | fluv-paro-sert | 0.445 | 0.522 | 0.852 | 0.394 | (0.00,1.47) | 0.000 |
| amit- | clom-miln-sert | 0.443 | 0.951 | 0.465 | 0.642 | (0.00,2.31) | 0.107 |
|       | Plac-cita-paro | 0.439 | 0.300 | 1.464 | 0.143 | (0.00,1.03) | 0.000 |
|       | bupr-fluo-venl | 0.436 | 0.293 | 1.489 | 0.136 | (0.00,1.01) | 0.000 |
|       | fluv-mirt-paro | 0.433 | 0.446 | 0.971 | 0.332 | (0.00,1.31) | 0.000 |
|       | clom-miln-paro | 0.432 | 0.722 | 0.598 | 0.550 | (0.00,1.85) | 0.111 |
|       | Plac-fluo-nefa | 0.419 | 0.473 | 0.885 | 0.376 | (0.00,1.35) | 0.100 |
|       | esci-sert-venl | 0.418 | 0.401 | 1.043 | 0.297 | (0.00,1.20) | 0.025 |
|       | Plac-amit-venl | 0.409 | 0.301 | 1.360 | 0.174 | (0.00,1.00) | 0.000 |
|       | clom-fluo-sert | 0.400 | 0.373 | 1.072 | 0.284 | (0.00,1.13) | 0.000 |
|       | agom-fluo-venl | 0.385 | 0.221 | 1.743 | 0.081 | (0.00,0.82) | 0.000 |
|       | amit-miln-paro | 0.380 | 0.405 | 0.937 | 0.349 | (0.00,1.17) | 0.000 |
|       | Plac-amit-mirt | 0.373 | 0.313 | 1.192 | 0.233 | (0.00,0.99) | 0.000 |
|       | dulo-fluo-paro | 0.370 | 0.347 | 1.064 | 0.287 | (0.00,1.05) | 0.013 |
|       | esci-paro-venl | 0.362 | 0.335 | 1.082 | 0.279 | (0.00,1.02) | 0.023 |
|       | amit-nefa-paro | 0.362 | 0.754 | 0.480 | 0.631 | (0.00,1.84) | 0.000 |
|       | Plac-amit-nefa | 0.351 | 0.694 | 0.505 | 0.613 | (0.00,1.71) | 0.000 |
|       | fluo-mirt-traz | 0.347 | 0.698 | 0.497 | 0.619 | (0.00,1.72) | 0.000 |
|       | fluo-fluv-sert | 0.347 | 0.429 | 0.808 | 0.419 | (0.00,1.19) | 0.000 |
|       | fluo-rebo-venl | 0.341 | 0.395 | 0.864 | 0.387 | (0.00,1.12) | 0.000 |
|       | Plac-amit-fluv | 0.340 | 0.331 | 1.026 | 0.305 | (0.00,0.99) | 0.000 |
|       | cita-paro-sert | 0.340 | 0.497 | 0.684 | 0.494 | (0.00,1.31) | 0.048 |
|       | Plac-cita-esci | 0.338 | 0.179 | 1.882 | 0.060 | (0.00,0.69) | 0.042 |
|       | Plac-cita-rebo | 0.334 | 0.322 | 1.035 | 0.301 | (0.00,0.97) | 0.027 |
|       | Plac-amit-sert | 0.332 | 0.274 | 1.211 | 0.226 | (0.00,0.87) | 0.079 |
|       | amit-paro-venl | 0.331 | 0.365 | 0.908 | 0.364 | (0.00,1.05) | 0.017 |
|       | Plac-agom-esci | 0.328 | 0.285 | 1.151 | 0.250 | (0.00,0.89) | 0.034 |
|       | amit-fluo-nefa | 0.327 | 0.775 | 0.421 | 0.674 | (0.00,1.85) | 0.000 |
|       | fluo-paro-venl | 0.321 | 0.222 | 1.449 | 0.147 | (0.00,0.76) | 0.017 |
|       | Plac-agom-dulo | 0.318 | 0.362 | 0.880 | 0.379 | (0.00,1.03) | 0.057 |
|       | mirt-paro-venl | 0.315 | 0.351 | 0.898 | 0.369 | (0.00,1.00) | 0.024 |
|       | amit-nefa-sert | 0.314 | 1.146 | 0.274 | 0.784 | (0.00,2.56) | 0.138 |
|       | clom-fluv-paro | 0.309 | 0.801 | 0.386 | 0.700 | (0.00,1.88) | 0.145 |
| amit- | clom-miln-venl | 0.307 | 0.769 | 0.400 | 0.689 | (0.00,1.81) | 0.000 |
|       | esci-paro-sert | 0.299 | 0.311 | 0.961 | 0.336 | (0.00,0.91) | 0.000 |
|       | agom-dulo-paro | 0.296 | 0.481 | 0.617 | 0.537 | (0.00,1.24) | 0.081 |
|       | fluo-nefa-sert | 0.291 | 0.541 | 0.538 | 0.591 | (0.00,1.35) | 0.000 |
|       | Plac-fluv-sert | 0.287 | 0.493 | 0.582 | 0.560 | (0.00,1.25) | 0.107 |
|       | nefa-paro-sert | 0.286 | 0.533 | 0.537 | 0.592 | (0.00,1.33) | 0.000 |
|       | cita-fluo-paro | 0.283 | 0.415 | 0.681 | 0.496 | (0.00,1.10) | 0.037 |
| amit- | clom-fluv-miln | 0.280 | 0.877 | 0.320 | 0.749 | (0.00,2.00) | 0.056 |
|       | Plac-amit-traz | 0.276 | 0.307 | 0.902 | 0.367 | (0.00,0.88) | 0.000 |
|       | Plac-paro-venl | 0.275 | 0.180 | 1.529 | 0.126 | (0.00,0.63) | 0.000 |
|       | fluo-paro-traz | 0.269 | 0.424 | 0.633 | 0.527 | (0.00,1.10) | 0.030 |

|                |       |       |       |       |             |       |
|----------------|-------|-------|-------|-------|-------------|-------|
| Plac-venl-vort | 0.265 | 0.215 | 1.232 | 0.218 | (0.00,0.69) | 0.024 |
| Plac-cita-mirt | 0.260 | 0.305 | 0.854 | 0.393 | (0.00,0.86) | 0.000 |
| cita-rebo-venl | 0.248 | 0.539 | 0.461 | 0.645 | (0.00,1.30) | 0.000 |
| fluo-sert-venl | 0.248 | 0.240 | 1.031 | 0.302 | (0.00,0.72) | 0.000 |
| amit-fluo-sert | 0.245 | 0.269 | 0.911 | 0.363 | (0.00,0.77) | 0.027 |
| amit-mirt-paro | 0.242 | 0.313 | 0.774 | 0.439 | (0.00,0.86) | 0.000 |
| Plac-mirt-traz | 0.242 | 0.684 | 0.353 | 0.724 | (0.00,1.58) | 0.022 |
| agom-esci-fluo | 0.237 | 0.356 | 0.666 | 0.505 | (0.00,0.93) | 0.041 |
| bupr-paro-sert | 0.235 | 1.170 | 0.200 | 0.841 | (0.00,2.53) | 0.000 |
| dulo-paro-venl | 0.232 | 0.253 | 0.917 | 0.359 | (0.00,0.73) | 0.005 |
| Plac-esci-venl | 0.228 | 0.215 | 1.058 | 0.290 | (0.00,0.65) | 0.000 |
| amit-fluo-traz | 0.226 | 0.404 | 0.560 | 0.575 | (0.00,1.02) | 0.000 |
| fluo-miln-paro | 0.225 | 0.394 | 0.571 | 0.568 | (0.00,1.00) | 0.025 |
| Plac-dulo-esci | 0.224 | 0.200 | 1.117 | 0.264 | (0.00,0.62) | 0.036 |
| cita-fluv-paro | 0.219 | 0.646 | 0.339 | 0.734 | (0.00,1.49) | 0.000 |
| cita-fluo-rebo | 0.219 | 0.370 | 0.593 | 0.553 | (0.00,0.94) | 0.023 |
| amit-paro-sert | 0.219 | 0.343 | 0.637 | 0.524 | (0.00,0.89) | 0.053 |
| bupr-esci-fluo | 0.214 | 0.386 | 0.553 | 0.580 | (0.00,0.97) | 0.061 |
| Plac-nefa-sert | 0.208 | 0.541 | 0.385 | 0.700 | (0.00,1.27) | 0.087 |
| fluo-fluv-paro | 0.205 | 0.488 | 0.420 | 0.675 | (0.00,1.16) | 0.025 |
| amit-mirt-venl | 0.197 | 0.429 | 0.458 | 0.647 | (0.00,1.04) | 0.000 |
| Plac-bupr-sert | 0.196 | 1.161 | 0.169 | 0.866 | (0.00,2.47) | 0.051 |
| bupr-fluo-sert | 0.195 | 1.114 | 0.175 | 0.861 | (0.00,2.38) | 0.000 |
| Plac-dulo-fluo | 0.194 | 0.389 | 0.500 | 0.617 | (0.00,0.96) | 0.084 |
| clom-paro-venl | 0.189 | 0.817 | 0.232 | 0.817 | (0.00,1.79) | 0.170 |
| fluv-mirt-sert | 0.188 | 0.547 | 0.343 | 0.731 | (0.00,1.26) | 0.051 |
| Plac-fluv-paro | 0.180 | 0.421 | 0.426 | 0.670 | (0.00,1.01) | 0.000 |
| amit-mirt-traz | 0.176 | 0.718 | 0.245 | 0.806 | (0.00,1.58) | 0.000 |
| Plac-esci-paro | 0.176 | 0.148 | 1.183 | 0.237 | (0.00,0.47) | 0.000 |
| mirt-paro-sert | 0.175 | 0.317 | 0.554 | 0.580 | (0.00,0.80) | 0.001 |
| clom-fluo-venl | 0.175 | 0.534 | 0.327 | 0.744 | (0.00,1.22) | 0.000 |
| Plac-paro-traz | 0.175 | 0.293 | 0.596 | 0.551 | (0.00,0.75) | 0.000 |
| cita-mirt-sert | 0.173 | 0.650 | 0.266 | 0.790 | (0.00,1.45) | 0.112 |
| Plac-esci-sert | 0.171 | 0.308 | 0.556 | 0.578 | (0.00,0.78) | 0.041 |
| amit-fluv-sert | 0.171 | 0.675 | 0.253 | 0.800 | (0.00,1.49) | 0.143 |
| agom-fluo-paro | 0.167 | 0.296 | 0.565 | 0.572 | (0.00,0.75) | 0.081 |
| amit-mirt-sert | 0.167 | 0.559 | 0.298 | 0.766 | (0.00,1.26) | 0.089 |
| agom-dulo-fluo | 0.163 | 0.423 | 0.386 | 0.699 | (0.00,0.99) | 0.012 |
| Plac-mirt-paro | 0.153 | 0.209 | 0.735 | 0.462 | (0.00,0.56) | 0.000 |
| Plac-mirt-venl | 0.149 | 0.264 | 0.565 | 0.572 | (0.00,0.67) | 0.000 |
| Plac-paro-rebo | 0.142 | 0.152 | 0.938 | 0.348 | (0.00,0.44) | 0.002 |
| cita-fluo-mirt | 0.130 | 0.333 | 0.389 | 0.697 | (0.00,0.78) | 0.000 |
| amit-fluv-mirt | 0.130 | 0.422 | 0.307 | 0.759 | (0.00,0.96) | 0.010 |
| esci-fluo-paro | 0.129 | 0.279 | 0.463 | 0.644 | (0.00,0.68) | 0.042 |
| dulo-esci-venl | 0.126 | 0.296 | 0.426 | 0.670 | (0.00,0.71) | 0.007 |
| fluo-nefa-paro | 0.125 | 0.538 | 0.233 | 0.816 | (0.00,1.18) | 0.027 |
| Plac-fluo-paro | 0.123 | 0.143 | 0.856 | 0.392 | (0.00,0.40) | 0.043 |
| clom-paro-sert | 0.121 | 0.563 | 0.215 | 0.830 | (0.00,1.22) | 0.114 |
| fluo-paro-sert | 0.116 | 0.272 | 0.426 | 0.670 | (0.00,0.65) | 0.023 |
| Plac-fluo-venl | 0.114 | 0.146 | 0.784 | 0.433 | (0.00,0.40) | 0.039 |
| amit-sert-venl | 0.114 | 0.562 | 0.203 | 0.839 | (0.00,1.22) | 0.120 |
| Plac-dulo-venl | 0.108 | 0.191 | 0.567 | 0.571 | (0.00,0.48) | 0.008 |
| fluo-fluv-mirt | 0.108 | 0.351 | 0.307 | 0.759 | (0.00,0.80) | 0.000 |
| Plac-fluv-mirt | 0.100 | 0.310 | 0.324 | 0.746 | (0.00,0.71) | 0.000 |
| amit-fluo-venl | 0.100 | 0.319 | 0.314 | 0.754 | (0.00,0.73) | 0.000 |
| esci-fluo-venl | 0.098 | 0.260 | 0.378 | 0.705 | (0.00,0.61) | 0.002 |
| Plac-bupr-paro | 0.096 | 0.384 | 0.249 | 0.803 | (0.00,0.85) | 0.000 |
| Plac-dulo-vort | 0.093 | 0.169 | 0.553 | 0.580 | (0.00,0.42) | 0.036 |
| Plac-fluo-rebo | 0.093 | 0.283 | 0.330 | 0.742 | (0.00,0.65) | 0.103 |
| clom-fluv-venl | 0.093 | 0.810 | 0.114 | 0.909 | (0.00,1.68) | 0.000 |
| Plac-mirt-sert | 0.088 | 0.410 | 0.215 | 0.830 | (0.00,0.89) | 0.071 |
| amit-fluo-paro | 0.086 | 0.214 | 0.402 | 0.688 | (0.00,0.51) | 0.013 |
| bupr-fluo-paro | 0.084 | 0.457 | 0.184 | 0.854 | (0.00,0.98) | 0.027 |
| Plac-desv-dulo | 0.081 | 0.305 | 0.266 | 0.790 | (0.00,0.68) | 0.030 |
| Plac-bupr-esci | 0.080 | 0.213 | 0.375 | 0.708 | (0.00,0.50) | 0.006 |
| Plac-bupr-fluo | 0.079 | 0.278 | 0.284 | 0.776 | (0.00,0.62) | 0.084 |
| fluo-mirt-paro | 0.075 | 0.244 | 0.306 | 0.759 | (0.00,0.55) | 0.018 |
| Plac-fluo-sert | 0.074 | 0.244 | 0.305 | 0.761 | (0.00,0.55) | 0.100 |
| amit-fluo-fluv | 0.069 | 0.384 | 0.181 | 0.857 | (0.00,0.82) | 0.000 |
| esci-fluo-sert | 0.068 | 0.316 | 0.216 | 0.829 | (0.00,0.69) | 0.009 |
| Plac-dulo-paro | 0.063 | 0.133 | 0.476 | 0.634 | (0.00,0.32) | 0.013 |
| amit-fluv-paro | 0.062 | 0.484 | 0.128 | 0.898 | (0.00,1.01) | 0.015 |
| amit-fluo-mirt | 0.055 | 0.327 | 0.168 | 0.867 | (0.00,0.70) | 0.000 |
| Plac-agom-fluo | 0.053 | 0.251 | 0.211 | 0.833 | (0.00,0.55) | 0.099 |
| mirt-paro-traz | 0.053 | 0.700 | 0.075 | 0.940 | (0.00,1.43) | 0.009 |
| fluo-mirt-sert | 0.051 | 0.290 | 0.177 | 0.860 | (0.00,0.62) | 0.000 |
| Plac-paro-sert | 0.051 | 0.223 | 0.230 | 0.818 | (0.00,0.49) | 0.012 |

|                |       |       |       |       |             |       |
|----------------|-------|-------|-------|-------|-------------|-------|
| cita-fluo-sert | 0.050 | 0.291 | 0.171 | 0.864 | (0.00,0.62) | 0.010 |
| bupr-esci-sert | 0.049 | 1.160 | 0.042 | 0.966 | (0.00,2.32) | 0.032 |
| Plac-agom-paro | 0.049 | 0.195 | 0.249 | 0.803 | (0.00,0.43) | 0.037 |
| Plac-cita-fluo | 0.048 | 0.287 | 0.168 | 0.867 | (0.00,0.61) | 0.074 |
| fluo-mirt-venl | 0.042 | 0.267 | 0.157 | 0.876 | (0.00,0.56) | 0.000 |
| agom-esci-venl | 0.039 | 0.330 | 0.118 | 0.906 | (0.00,0.69) | 0.000 |
| Plac-sert-venl | 0.038 | 0.245 | 0.155 | 0.877 | (0.00,0.52) | 0.022 |
| fluo-paro-rebo | 0.036 | 0.247 | 0.147 | 0.883 | (0.00,0.52) | 0.029 |
| Plac-fluo-mirt | 0.035 | 0.278 | 0.127 | 0.899 | (0.00,0.58) | 0.087 |
| Plac-esci-fluo | 0.027 | 0.229 | 0.119 | 0.905 | (0.00,0.48) | 0.053 |
| cita-mirt-paro | 0.027 | 0.427 | 0.063 | 0.950 | (0.00,0.86) | 0.006 |
| Plac-cita-sert | 0.026 | 0.286 | 0.091 | 0.927 | (0.00,0.59) | 0.045 |
| Plac-fluo-traz | 0.026 | 0.414 | 0.062 | 0.951 | (0.00,0.84) | 0.106 |
| dulo-esci-paro | 0.023 | 0.221 | 0.106 | 0.915 | (0.00,0.46) | 0.010 |
| clom-sert-venl | 0.023 | 0.694 | 0.033 | 0.974 | (0.00,1.38) | 0.080 |
| Plac-fluo-fluv | 0.013 | 0.426 | 0.030 | 0.976 | (0.00,0.85) | 0.106 |
| cita-paro-rebo | 0.013 | 0.423 | 0.030 | 0.976 | (0.00,0.84) | 0.016 |
| amit-paro-traz | 0.001 | 0.371 | 0.002 | 0.998 | (0.00,0.73) | 0.000 |
| Plac-cita-vila | 0.001 | 0.204 | 0.004 | 0.997 | (0.00,0.40) | 0.000 |
| bupr-esci-paro | 0.001 | 0.502 | 0.001 | 0.999 | (0.00,0.98) | 0.037 |

#### 7.4.4.2 Side-splitting

| Side      | Direct<br>Coef. | Std. Err. | Indirect<br>Coef. | Std. Err. | Difference<br>Coef. | Std. Err. | P> z  |
|-----------|-----------------|-----------|-------------------|-----------|---------------------|-----------|-------|
| Plac agom | .2742141        | .1008079  | .4267388          | .0950954  | -.1525247           | .1387232  | 0.272 |
| Plac amit | .9241333        | .116775   | .4925027          | .0810043  | .4316306            | .1433067  | 0.003 |
| Plac bupr | .3560292        | .0993803  | .7296492          | .1536516  | -.37362             | .1835915  | 0.042 |
| Plac cita | .3075801        | .0990608  | .3136082          | .08528    | -.0060281           | .131428   | 0.963 |
| Plac dulo | .5653745        | .0679892  | .5554197          | .0941565  | .0099547            | .1180411  | 0.933 |
| Plac esci | .3555811        | .0745968  | .6003433          | .0773862  | -.2447622           | .1082139  | 0.024 |
| Plac fluo | .30149          | .0635611  | .4145661          | .0578933  | -.1130761           | .0862272  | 0.190 |
| Plac fluv | .5162983        | .2057231  | .4702389          | .122176   | .0460593            | .2392422  | 0.847 |
| Plac mirt | .4799069        | .1499081  | .4787367          | .0942249  | .0011701            | .1795984  | 0.995 |
| Plac nefa | .6705887        | .1813463  | .3516411          | .2129321  | .3189476            | .2796895  | 0.254 |
| Plac paro | .4791893        | .0571388  | .4939838          | .0605267  | -.0147944           | .0834337  | 0.859 |
| Plac rebo | .18131          | .1081985  | .2000003          | .1320203  | -.0186904           | .170965   | 0.913 |
| Plac sert | .4028782        | .1059181  | .4142359          | .0781377  | -.0113578           | .1317119  | 0.931 |
| Plac traz | .3373667        | .1678135  | .274706           | .1463917  | .0626606            | .2233274  | 0.779 |
| Plac venl | .5789591        | .0755828  | .4645588          | .0660139  | .1144003            | .1008816  | 0.257 |
| Plac vort | .3780048        | .0772756  | .4183703          | .1697759  | -.0403655           | .1900658  | 0.832 |
| agom venl | .6234499        | .2769449  | .165558           | .0871584  | .4578919            | .2903361  | 0.115 |
| agom esci | .2207809        | .2387446  | .1645752          | .0875731  | -.3853561           | .2542993  | 0.130 |
| agom fluo | .0247353        | .1396562  | .0017863          | .0873788  | .022949             | .1651037  | 0.889 |
| agom paro | .2484744        | .1396965  | .086656           | .0863003  | .1618184            | .1635326  | 0.322 |
| agom venl | .2598312        | .2092811  | .2274581          | .0846972  | -.4872893           | .2257737  | 0.031 |
| amit fluo | .1423882        | .1603549  | -.3023517         | .0785859  | .1599636            | .1786469  | 0.371 |
| amit fluv | .0613769        | .2735419  | -.1722257         | .1275542  | .1108488            | .3017491  | 0.713 |
| amit miln | .4157315        | .4037919  | -.2018824         | .1609912  | -.2138491           | .4347024  | 0.623 |
| amit mirt | .0923577        | .2673307  | -.1646894         | .1013209  | .0723316            | .285852   | 0.800 |
| amit nefa | .0953095        | .6835875  | -.1079172         | .1538382  | .2032267            | .700684   | 0.772 |
| amit paro | .0105921        | .1234971  | -.2094176         | .0819697  | .1988256            | .1482359  | 0.180 |
| amit sert | .2276593        | .1419361  | -.2230223         | .0964473  | -.004637            | .1716713  | 0.978 |
| amit traz | .3044849        | .2668247  | -.340145          | .1350799  | .03566              | .2988839  | 0.905 |
| amit venl | .0625363        | .2956076  | -.1337461         | .0798471  | .1962824            | .3062014  | 0.522 |
| bupr esci | .0708213        | .2064996  | -.0104458         | .1070143  | .0812671            | .2325033  | 0.727 |
| bupr fluo | .1290124        | .1848312  | -.0962969         | .102387   | -.0327156           | .2112596  | 0.877 |
| bupr paro | .0285873        | .4056227  | .0184147          | .092918   | .0101726            | .4161292  | 0.980 |
| bupr sert | .2231338        | 1.1074    | -.0593396         | .1026126  | .2824734            | 1.112144  | 0.800 |
| bupr traz | .7463907        | .419044   | -.0997854         | .1406402  | -.6466053           | .4420153  | 0.144 |
| bupr venl | .4392145        | .2859877  | .1044274          | .0982077  | -.5436419           | .3023801  | 0.072 |
| cita clom | 1.298032        | .4368018  | .0872732          | .1266529  | 1.210759            | .4547932  | 0.008 |
| cita esci | .3931275        | .1016305  | -.0418589         | .0957442  | .4349864            | .1395716  | 0.002 |
| cita fluo | .0582283        | .1956727  | .0690615          | .076364   | -.1272898           | .2100509  | 0.545 |
| cita fluv | .5833954        | .4738403  | .2219321          | .1225709  | -.8053275           | .4894367  | 0.100 |
| cita mirt | .0870115        | .3040366  | .1961548          | .1009481  | -.2831662           | .3203572  | 0.377 |
| cita paro | .2543858        | .3228698  | .1980203          | .0736482  | -.452406            | .3317471  | 0.173 |
| cita rebo | .4534165        | .2751395  | -.0722515         | .1070669  | -.381165            | .2952373  | 0.197 |
| cita sert | .0538369        | .209193   | .1076963          | .0905164  | -.0538594           | .2278978  | 0.813 |
| cita venl | .7713011        | .3545617  | .2508198          | .078555   | -1.022121           | .3632405  | 0.005 |
| cita vila | .0571497        | .1986198  | .0863117          | .1444772  | -.0291621           | .2457155  | 0.906 |
| clom fluo | .3409582        | .2460238  | -.2479651         | .1240904  | .5889233            | .2754941  | 0.033 |

```

clom fluv -.436202 .5125198 .0271245 .1510976 -.4633264 .5343301 0.386
clom miln-.4986637 .4232228 -.0131933 .1816694 -.4854703 .4605663 0.292
clom paro -.031953 .1511654 .0201977 .1526492 -.0521506 .2148302 0.808
clom sert .0908138 .2889452 -.1169353 .129823 .2077491 .316767 0.512
clom venl .2876811 .503945 .0071756 .1190794 .2805054 .5178228 0.588
desv dulo .3329104 .2732742 .2125814 .1130657 .1203291 .2967423 0.685
dulo esci .0173482 .1597234 -.1137475 .0790624 .1310957 .1782316 0.462
dulo fluo-.4234202 .3206089 -.1884475 .0668632 -.2349727 .3280352 0.474
dulo paro-.0262073 .1111627 -.0981952 .0745963 .0719879 .1343478 0.592
dulo venl .1274991 .1929787 -.072681 .0730183 .2001801 .2063243 0.332
dulo vort-.2546992 .1130444 -.1041826 .1087407 -.1505166 .1574449 0.339
esci fluo .0060652 .1769062 -.127646 .0673566 .1337111 .1893701 0.480
esci paro-.0445955 .156975 .0227883 .0676492 -.0673838 .1710477 0.694
esci sert .1973457 .254803 -.0903131 .0813813 .2876588 .2674512 0.282
esci venl .0029825 .2270103 .0440628 .0714351 -.0410803 .2379822 0.863
fluo fluv .1684262 .2790038 .1103187 .1167112 .0581075 .3024221 0.848
fluo miln .2608335 .3406348 -.007133 .1577959 .2679666 .3754087 0.475
fluo mirt .1228264 .1642476 .1135786 .0935013 .0092477 .1889685 0.961
fluo nefa-.0731966 .3840808 .2121007 .1525065 -.2852974 .4132447 0.490
fluo paro .0729963 .099284 .1394884 .0574559 -.066492 .1145319 0.562
fluo rebo-.1733843 .1694422 -.1748456 .1028733 .0014613 .1980348 0.994
fluo sert .1517345 .1482942 .0194696 .0759256 .1322649 .1665881 0.427
fluo traz .0595788 .2979704 -.0820012 .1227041 .14158 .3222506 0.660
fluo venl .1498138 .0915963 .1518161 .0692024 -.0020023 .1147595 0.986
fluv mirt-.1766771 .2293632 .0597968 .1382579 -.2364739 .2678081 0.377
fluv paro .1074053 .3896344 -.0048645 .1126463 .1122698 .4056007 0.782
fluv sert-.3743977 .341117 -.0330137 .1226846 -.341384 .3625052 0.346
fluv venl .6321052 .4547529 -.0068444 .1154137 .6389496 .4691699 0.173
miln paro .036084 .175547 .1609197 .2273029 -.1248358 .287178 0.664
mirt paro-.1255477 .1670261 .0479214 .0927999 -.173469 .1910706 0.364
mirt sert-.0098146 .2717728 -.076703 .0989077 .0668883 .2892113 0.817
mirt traz-.3653329 .6422027 -.1691677 .1339661 -.1961651 .655639 0.765
mirt venl-.0296934 .243448 .0446196 .0926351 -.074313 .2604758 0.775
nefa paro .2716517 .3627116 -.1081791 .1535092 .3798308 .3938298 0.335
nefa sert-.0655973 .4056699 -.1355531 .1583121 .0699558 .4354662 0.872
paro rebo-.2142652 .1444555 -.3443312 .10864 .1300659 .1807835 0.472
paro sert-.0270348 .2115334 -.0816764 .0724652 .0546416 .2236256 0.807
paro traz-.2891909 .2787074 -.1636174 .123715 -.1255736 .3049765 0.681
paro venl .3891754 .1904294 -.0092893 .061129 .3984647 .2002183 0.047
rebo venl-.0465201 .394682 .3475787 .0960614 -.3940988 .406204 0.332
sert traz .4587335 .3998632 -.1658906 .127368 .6246241 .4196584 0.137
sert venl .2199969 .209497 .0877627 .0785648 .1322342 .2237383 0.555
traz venl .9022304 .510545 .1760041 .1203618 .7262263 .5230417 0.165
venl vort .0995657 .1878571 -.1800679 .0886338 .2796335 .2080229 0.179

```

### 7.4.4.3 Design-by-treatment test

$$\text{chi2}(133) = 120.68$$

$$\text{Prob} > \text{chi2} = 0.4655$$

## 7.4.5 Dropouts due to adverse events

### 7.4.5.1 Loop-specific approach

Loops With Evidence of Statistical Inconsistency:

| Loop           | IF    | seIF  | z_value | p_value | CI_95        | Loop_Heterog_tau2 |
|----------------|-------|-------|---------|---------|--------------|-------------------|
| mirt-sert-traz | 3.232 | 1.092 | 2.960   | 0.003   | (1.09, 5.37) | 0.000             |
| paro-sert-traz | 2.189 | 1.058 | 2.069   | 0.039   | (0.12, 4.26) | 0.000             |
| Plac-mirt-sert | 1.997 | 0.690 | 2.892   | 0.004   | (0.64, 3.35) | 0.126             |
| agom-dulo-venl | 1.909 | 0.587 | 3.252   | 0.001   | (0.76, 3.06) | 0.000             |
| agom-dulo-esci | 1.904 | 0.792 | 2.405   | 0.016   | (0.35, 3.46) | 0.087             |
| cita-fluo-venl | 1.876 | 0.933 | 2.011   | 0.044   | (0.05, 3.70) | 0.020             |

|                |       |       |       |       |             |       |
|----------------|-------|-------|-------|-------|-------------|-------|
| amit-mirt-sert | 1.673 | 0.602 | 2.780 | 0.005 | (0.49,2.85) | 0.000 |
| dulo-venl-vort | 1.577 | 0.427 | 3.694 | 0.000 | (0.74,2.41) | 0.017 |
| esci-paro-venl | 1.297 | 0.579 | 2.240 | 0.025 | (0.16,2.43) | 0.000 |
| agom-paro-venl | 1.278 | 0.489 | 2.612 | 0.009 | (0.32,2.24) | 0.000 |
| amit-fluo-sert | 1.270 | 0.439 | 2.896 | 0.004 | (0.41,2.13) | 0.029 |
| Plac-fluv-mirt | 1.199 | 0.428 | 2.803 | 0.005 | (0.36,2.04) | 0.000 |
| Plac-dulo-venl | 1.025 | 0.338 | 3.032 | 0.002 | (0.36,1.69) | 0.037 |
| amit-fluo-paro | 0.795 | 0.340 | 2.338 | 0.019 | (0.13,1.46) | 0.000 |
| Plac-dulo-esci | 0.675 | 0.300 | 2.252 | 0.024 | (0.09,1.26) | 0.000 |
| Plac-paro-venl | 0.583 | 0.297 | 1.962 | 0.050 | (0.00,1.17) | 0.009 |

Loops Without Evidence of Statistical Inconsistency:

| Loop                | IF    | seIF  | z_value | p_value | CI_95       | Loop_Heterog_tau2 |
|---------------------|-------|-------|---------|---------|-------------|-------------------|
| Plac-cita-clom      | 3.244 | 1.849 | 1.755   | 0.079   | (0.00,6.87) | 0.000             |
| cita-clom-fluv      | 2.428 | 1.998 | 1.216   | 0.224   | (0.00,6.34) | 0.000             |
| clom-fluv-mirt-venl | 2.094 | 1.436 | 1.458   | 0.145   | (0.00,4.91) | 0.000             |
| clom-fluo-fluv      | 1.985 | 1.700 | 1.167   | 0.243   | (0.00,5.32) | 0.000             |
| bupr-esci-sert-traz | 1.957 | 1.789 | 1.094   | 0.274   | (0.00,5.46) | 0.658             |
| Plac-clom-sert      | 1.904 | 1.254 | 1.517   | 0.129   | (0.00,4.36) | 0.141             |
| Plac-clom-fluo      | 1.879 | 1.209 | 1.555   | 0.120   | (0.00,4.25) | 0.058             |
| amit-clom-fluv-venl | 1.798 | 1.489 | 1.207   | 0.227   | (0.00,4.72) | 0.000             |
| Plac-cita-venl      | 1.677 | 0.908 | 1.847   | 0.065   | (0.00,3.46) | 0.057             |
| Plac-clom-venl      | 1.622 | 1.279 | 1.269   | 0.205   | (0.00,4.13) | 0.104             |
| fluo-sert-traz      | 1.604 | 0.990 | 1.620   | 0.105   | (0.00,3.54) | 0.000             |
| cita-fluo-sert      | 1.584 | 0.977 | 1.622   | 0.105   | (0.00,3.50) | 0.000             |
| cita-mirt-sert      | 1.570 | 1.196 | 1.313   | 0.189   | (0.00,3.91) | 0.000             |
| cita-clom-fluo      | 1.544 | 1.614 | 0.957   | 0.339   | (0.00,4.71) | 0.000             |
| agom-dulo-fluo      | 1.533 | 1.172 | 1.307   | 0.191   | (0.00,3.83) | 0.000             |
| Plac-sert-traz      | 1.501 | 1.002 | 1.497   | 0.134   | (0.00,3.47) | 0.132             |
| cita-paro-venl      | 1.472 | 0.994 | 1.481   | 0.139   | (0.00,3.42) | 0.000             |
| bupr-paro-venl      | 1.417 | 0.756 | 1.875   | 0.061   | (0.00,2.90) | 0.000             |
| Plac-clom-paro      | 1.375 | 1.075 | 1.279   | 0.201   | (0.00,3.48) | 0.000             |
| amit-sert-traz      | 1.295 | 0.961 | 1.347   | 0.178   | (0.00,3.18) | 0.006             |
| Plac-amit-clom-miln | 1.263 | 1.688 | 0.748   | 0.454   | (0.00,4.57) | 0.267             |
| amit-fluv-sert      | 1.252 | 0.948 | 1.320   | 0.187   | (0.00,3.11) | 0.073             |
| amit-bupr-fluo      | 1.232 | 1.410 | 0.873   | 0.382   | (0.00,4.00) | 0.223             |
| mirt-paro-sert      | 1.221 | 0.772 | 1.581   | 0.114   | (0.00,2.73) | 0.000             |
| fluv-mirt-paro      | 1.202 | 0.843 | 1.427   | 0.154   | (0.00,2.85) | 0.165             |
| cita-esci-venl      | 1.170 | 0.971 | 1.204   | 0.228   | (0.00,3.07) | 0.043             |
| Plac-dulo-fluo      | 1.154 | 1.121 | 1.030   | 0.303   | (0.00,3.35) | 0.038             |
| agom-esci-fluo      | 1.142 | 0.589 | 1.940   | 0.052   | (0.00,2.30) | 0.000             |
| Plac-cita-mirt      | 1.130 | 0.708 | 1.595   | 0.111   | (0.00,2.52) | 0.025             |
| cita-esci-sert      | 1.130 | 1.064 | 1.062   | 0.288   | (0.00,3.21) | 0.055             |
| cita-fluo-fluv      | 1.100 | 1.128 | 0.976   | 0.329   | (0.00,3.31) | 0.000             |
| amit-bupr-venl      | 1.095 | 1.323 | 0.828   | 0.408   | (0.00,3.69) | 0.000             |
| cita-clom-paro      | 1.054 | 1.660 | 0.635   | 0.525   | (0.00,4.31) | 0.041             |
| mirt-sert-venl      | 1.049 | 0.696 | 1.507   | 0.132   | (0.00,2.41) | 0.000             |
| clom-fluv-paro      | 1.038 | 1.687 | 0.616   | 0.538   | (0.00,4.34) | 0.231             |
| cita-fluv-sert      | 1.024 | 1.238 | 0.827   | 0.408   | (0.00,3.45) | 0.000             |
| cita-esci-paro      | 1.020 | 0.667 | 1.529   | 0.126   | (0.00,2.33) | 0.000             |
| clom-fluo-miln      | 1.001 | 0.813 | 1.231   | 0.218   | (0.00,2.59) | 0.000             |
| amit-fluv-paro      | 0.991 | 0.640 | 1.548   | 0.122   | (0.00,2.25) | 0.000             |
| clom-fluv-sert      | 0.986 | 2.541 | 0.388   | 0.698   | (0.00,5.97) | 1.291             |
| dulo-esci-paro      | 0.960 | 0.504 | 1.904   | 0.057   | (0.00,1.95) | 0.000             |
| Plac-nefa-sert      | 0.950 | 0.600 | 1.581   | 0.114   | (0.00,2.13) | 0.074             |
| dulo-fluo-paro      | 0.943 | 1.115 | 0.846   | 0.398   | (0.00,3.13) | 0.000             |
| amit-fluo-miln      | 0.935 | 0.960 | 0.975   | 0.330   | (0.00,2.82) | 0.070             |
| Plac-paro-sert      | 0.933 | 0.561 | 1.663   | 0.096   | (0.00,2.03) | 0.003             |
| amit-bupr-traz      | 0.885 | 1.323 | 0.669   | 0.503   | (0.00,3.48) | 0.000             |
| Plac-amit-bupr      | 0.884 | 1.259 | 0.702   | 0.483   | (0.00,3.35) | 0.132             |
| amit-fluo-traz      | 0.862 | 0.777 | 1.109   | 0.267   | (0.00,2.39) | 0.101             |
| esci-fluo-paro      | 0.837 | 0.503 | 1.663   | 0.096   | (0.00,1.82) | 0.000             |
| cita-fluo-mirt      | 0.830 | 0.743 | 1.116   | 0.264   | (0.00,2.29) | 0.000             |
| Plac-cita-paro      | 0.824 | 0.526 | 1.567   | 0.117   | (0.00,1.86) | 0.000             |
| fluo-mirt-sert      | 0.815 | 0.620 | 1.315   | 0.189   | (0.00,2.03) | 0.000             |
| fluo-mirt-traz      | 0.812 | 0.704 | 1.153   | 0.249   | (0.00,2.19) | 0.000             |
| cita-fluo-paro      | 0.806 | 0.591 | 1.363   | 0.173   | (0.00,1.96) | 0.000             |
| dulo-esci-fluo      | 0.799 | 1.186 | 0.674   | 0.500   | (0.00,3.12) | 0.037             |
| amit-fluv-miln      | 0.794 | 0.994 | 0.799   | 0.425   | (0.00,2.74) | 0.000             |
| cita-paro-sert      | 0.794 | 1.134 | 0.700   | 0.484   | (0.00,3.02) | 0.000             |
| cita-mirt-venl      | 0.788 | 1.067 | 0.738   | 0.460   | (0.00,2.88) | 0.000             |
| fluo-traz-venl      | 0.773 | 0.671 | 1.152   | 0.249   | (0.00,2.09) | 0.030             |
| clom-fluo-sert      | 0.762 | 0.684 | 1.115   | 0.265   | (0.00,2.10) | 0.000             |



|       |                |       |       |       |       |             |       |
|-------|----------------|-------|-------|-------|-------|-------------|-------|
|       | dulo-esci-venl | 0.745 | 0.671 | 1.110 | 0.267 | (0.00,2.06) | 0.114 |
|       | Plac-fluo-sert | 0.736 | 0.377 | 1.951 | 0.051 | (0.00,1.48) | 0.072 |
|       | Plac-sert-venl | 0.724 | 0.515 | 1.406 | 0.160 | (0.00,1.73) | 0.095 |
|       | cita-clom-sert | 0.722 | 1.788 | 0.404 | 0.686 | (0.00,4.23) | 0.000 |
| amit- | cita-fluv-venl | 0.690 | 1.069 | 0.645 | 0.519 | (0.00,2.78) | 0.000 |
|       | agom-esci-venl | 0.690 | 0.694 | 0.994 | 0.320 | (0.00,2.05) | 0.000 |
|       | bupr-traz-venl | 0.681 | 0.714 | 0.954 | 0.340 | (0.00,2.08) | 0.000 |
|       | Plac-agom-esci | 0.680 | 0.526 | 1.292 | 0.196 | (0.00,1.71) | 0.000 |
|       | fluo-fluv-paro | 0.672 | 1.193 | 0.563 | 0.573 | (0.00,3.01) | 0.044 |
|       | agom-esci-paro | 0.671 | 0.659 | 1.019 | 0.308 | (0.00,1.96) | 0.000 |
|       | Plac-cita-sert | 0.671 | 0.960 | 0.699 | 0.485 | (0.00,2.55) | 0.053 |
|       | Plac-amit-fluv | 0.671 | 0.446 | 1.505 | 0.132 | (0.00,1.54) | 0.062 |
|       | paro-rebo-venl | 0.666 | 1.011 | 0.659 | 0.510 | (0.00,2.65) | 0.336 |
|       | fluo-miln-paro | 0.665 | 0.425 | 1.566 | 0.117 | (0.00,1.50) | 0.000 |
|       | Plac-esci-sert | 0.649 | 0.520 | 1.248 | 0.212 | (0.00,1.67) | 0.046 |
|       | amit-sert-venl | 0.648 | 0.652 | 0.994 | 0.320 | (0.00,1.93) | 0.000 |
|       | esci-paro-sert | 0.644 | 0.801 | 0.805 | 0.421 | (0.00,2.21) | 0.000 |
|       | Plac-desv-dulo | 0.637 | 0.396 | 1.609 | 0.108 | (0.00,1.41) | 0.000 |
|       | Plac-fluv-sert | 0.636 | 0.867 | 0.734 | 0.463 | (0.00,2.34) | 0.068 |
|       | amit-fluo-venl | 0.634 | 0.603 | 1.050 | 0.294 | (0.00,1.82) | 0.050 |
|       | cita-esci-fluo | 0.623 | 0.488 | 1.276 | 0.202 | (0.00,1.58) | 0.000 |
|       | Plac-fluo-fluv | 0.605 | 1.053 | 0.574 | 0.566 | (0.00,2.67) | 0.019 |
| amit- | clom-miln-sert | 0.595 | 1.119 | 0.531 | 0.595 | (0.00,2.79) | 0.052 |
|       | clom-fluv-miln | 0.588 | 1.490 | 0.395 | 0.693 | (0.00,3.51) | 0.000 |
|       | Plac-amit-fluo | 0.578 | 0.374 | 1.544 | 0.123 | (0.00,1.31) | 0.131 |
|       | Plac-bupr-paro | 0.574 | 0.627 | 0.915 | 0.360 | (0.00,1.80) | 0.000 |
|       | fluo-paro-traz | 0.570 | 0.603 | 0.944 | 0.345 | (0.00,1.75) | 0.000 |
|       | Plac-agom-dulo | 0.567 | 0.429 | 1.323 | 0.186 | (0.00,1.41) | 0.000 |
|       | Plac-fluo-traz | 0.563 | 0.602 | 0.935 | 0.350 | (0.00,1.74) | 0.079 |
|       | bupr-paro-traz | 0.553 | 0.828 | 0.668 | 0.504 | (0.00,2.18) | 0.000 |
|       | amit-fluo-fluv | 0.547 | 1.125 | 0.486 | 0.627 | (0.00,2.75) | 0.026 |
|       | bupr-fluo-paro | 0.540 | 0.720 | 0.750 | 0.453 | (0.00,1.95) | 0.009 |
|       | Plac-fluo-rebo | 0.518 | 0.344 | 1.508 | 0.132 | (0.00,1.19) | 0.050 |
|       | clom-sert-venl | 0.514 | 0.790 | 0.651 | 0.515 | (0.00,2.06) | 0.000 |
|       | amit-miln-paro | 0.511 | 0.809 | 0.632 | 0.528 | (0.00,2.10) | 0.000 |
|       | Plac-cita-vila | 0.493 | 0.452 | 1.092 | 0.275 | (0.00,1.38) | 0.000 |
|       | agom-fluo-venl | 0.492 | 0.441 | 1.116 | 0.265 | (0.00,1.36) | 0.000 |
|       | fluo-fluv-sert | 0.482 | 1.669 | 0.289 | 0.773 | (0.00,3.75) | 0.194 |
|       | amit-paro-sert | 0.480 | 0.575 | 0.835 | 0.404 | (0.00,1.61) | 0.000 |
|       | Plac-clom-fluv | 0.479 | 1.661 | 0.288 | 0.773 | (0.00,3.73) | 0.000 |
|       | amit-traz-venl | 0.471 | 0.759 | 0.621 | 0.535 | (0.00,1.96) | 0.000 |
|       | bupr-fluo-venl | 0.466 | 0.629 | 0.742 | 0.458 | (0.00,1.70) | 0.048 |
|       | cita-fluv-paro | 0.452 | 0.800 | 0.565 | 0.572 | (0.00,2.02) | 0.000 |
|       | bupr-fluo-traz | 0.446 | 1.059 | 0.421 | 0.674 | (0.00,2.52) | 0.301 |
|       | cita-mirt-paro | 0.445 | 0.820 | 0.543 | 0.587 | (0.00,2.05) | 0.000 |
|       | Plac-nefa-paro | 0.445 | 0.448 | 0.993 | 0.321 | (0.00,1.32) | 0.000 |
|       | Plac-fluo-mirt | 0.439 | 0.362 | 1.214 | 0.225 | (0.00,1.15) | 0.073 |
|       | Plac-agom-paro | 0.433 | 0.274 | 1.580 | 0.114 | (0.00,0.97) | 0.000 |
|       | fluo-mirt-paro | 0.421 | 0.358 | 1.176 | 0.240 | (0.00,1.12) | 0.000 |
|       | fluo-paro-venl | 0.420 | 0.308 | 1.363 | 0.173 | (0.00,1.02) | 0.000 |
|       | clom-paro-sert | 0.420 | 0.820 | 0.513 | 0.608 | (0.00,2.03) | 0.077 |
| amit- | clom-miln-venl | 0.416 | 1.184 | 0.351 | 0.725 | (0.00,2.74) | 0.000 |
|       | Plac-amit-mirt | 0.415 | 0.431 | 0.963 | 0.335 | (0.00,1.26) | 0.091 |
|       | amit-paro-traz | 0.411 | 0.591 | 0.695 | 0.487 | (0.00,1.57) | 0.000 |
|       | dulo-paro-venl | 0.408 | 0.401 | 1.015 | 0.310 | (0.00,1.19) | 0.000 |
|       | amit-fluo-mirt | 0.402 | 0.455 | 0.885 | 0.376 | (0.00,1.29) | 0.000 |
|       | nefa-paro-sert | 0.401 | 0.791 | 0.507 | 0.612 | (0.00,1.95) | 0.000 |
|       | fluo-fluv-miln | 0.395 | 1.212 | 0.326 | 0.744 | (0.00,2.77) | 0.000 |
|       | cita-fluv-mirt | 0.395 | 0.794 | 0.497 | 0.619 | (0.00,1.95) | 0.000 |
|       | fluo-nefa-paro | 0.390 | 0.723 | 0.540 | 0.589 | (0.00,1.81) | 0.000 |
|       | fluv-miln-paro | 0.387 | 1.059 | 0.366 | 0.715 | (0.00,2.46) | 0.133 |
|       | Plac-esci-paro | 0.384 | 0.433 | 0.887 | 0.375 | (0.00,1.23) | 0.000 |
|       | agom-fluo-paro | 0.366 | 0.311 | 1.175 | 0.240 | (0.00,0.98) | 0.000 |
|       | Plac-bupr-esci | 0.358 | 0.470 | 0.763 | 0.445 | (0.00,1.28) | 0.000 |
|       | Plac-esci-venl | 0.357 | 0.419 | 0.850 | 0.395 | (0.00,1.18) | 0.047 |
|       | clom-paro-venl | 0.356 | 0.618 | 0.576 | 0.565 | (0.00,1.57) | 0.000 |
|       | Plac-amit-paro | 0.343 | 0.246 | 1.398 | 0.162 | (0.00,0.82) | 0.012 |
|       | Plac-venl-vort | 0.342 | 0.366 | 0.935 | 0.350 | (0.00,1.06) | 0.048 |
|       | Plac-cita-fluv | 0.337 | 0.446 | 0.756 | 0.449 | (0.00,1.21) | 0.000 |
|       | Plac-esci-fluo | 0.328 | 0.323 | 1.014 | 0.311 | (0.00,0.96) | 0.000 |
|       | Plac-agom-venl | 0.323 | 0.426 | 0.757 | 0.449 | (0.00,1.16) | 0.005 |
|       | clom-fluo-paro | 0.318 | 0.536 | 0.592 | 0.554 | (0.00,1.37) | 0.000 |
|       | amit-fluv-mirt | 0.273 | 0.537 | 0.509 | 0.611 | (0.00,1.32) | 0.000 |
|       | bupr-esci-fluo | 0.271 | 0.830 | 0.327 | 0.744 | (0.00,1.90) | 0.227 |
|       | cita-sert-venl | 0.267 | 1.286 | 0.208 | 0.835 | (0.00,2.79) | 0.000 |
|       | Plac-amit-traz | 0.260 | 0.703 | 0.370 | 0.711 | (0.00,1.64) | 0.214 |
|       | amit-mirt-traz | 0.260 | 0.703 | 0.371 | 0.711 | (0.00,1.64) | 0.000 |

|                     |       |       |       |       |             |       |
|---------------------|-------|-------|-------|-------|-------------|-------|
| clom-fluo-venl      | 0.256 | 0.745 | 0.344 | 0.731 | (0.00,1.72) | 0.004 |
| Plac-bupr-traz      | 0.252 | 0.559 | 0.450 | 0.653 | (0.00,1.35) | 0.010 |
| esci-sert-venl      | 0.251 | 0.727 | 0.346 | 0.729 | (0.00,1.68) | 0.030 |
| Plac-bupr-venl      | 0.247 | 0.517 | 0.478 | 0.632 | (0.00,1.26) | 0.061 |
| amit-paro-venl      | 0.243 | 0.558 | 0.435 | 0.663 | (0.00,1.34) | 0.000 |
| fluo-mirt-venl      | 0.239 | 0.350 | 0.684 | 0.494 | (0.00,0.92) | 0.000 |
| Plac-dulo-vort      | 0.239 | 0.275 | 0.870 | 0.385 | (0.00,0.78) | 0.032 |
| fluo-rebo-venl      | 0.239 | 0.685 | 0.349 | 0.727 | (0.00,1.58) | 0.035 |
| mirt-paro-venl      | 0.238 | 0.408 | 0.584 | 0.559 | (0.00,1.04) | 0.000 |
| mirt-traz-venl      | 0.234 | 0.667 | 0.352 | 0.725 | (0.00,1.54) | 0.000 |
| Plac-paro-traz      | 0.232 | 0.472 | 0.490 | 0.624 | (0.00,1.16) | 0.000 |
| Plac-mirt-venl      | 0.230 | 0.396 | 0.581 | 0.561 | (0.00,1.00) | 0.088 |
| Plac-fluo-nefa      | 0.229 | 0.663 | 0.345 | 0.730 | (0.00,1.53) | 0.044 |
| agom-dulo-paro      | 0.223 | 0.471 | 0.474 | 0.635 | (0.00,1.15) | 0.000 |
| Plac-bupr-fluo      | 0.219 | 0.467 | 0.469 | 0.639 | (0.00,1.13) | 0.072 |
| Plac-cita-esci      | 0.217 | 0.347 | 0.624 | 0.533 | (0.00,0.90) | 0.000 |
| Plac-fluo-paro      | 0.215 | 0.187 | 1.149 | 0.251 | (0.00,0.58) | 0.000 |
| Plac-paro-rebo      | 0.209 | 0.321 | 0.650 | 0.516 | (0.00,0.84) | 0.068 |
| esci-fluo-sert      | 0.208 | 0.585 | 0.355 | 0.722 | (0.00,1.36) | 0.000 |
| Plac-rebo-venl      | 0.202 | 0.727 | 0.277 | 0.782 | (0.00,1.63) | 0.129 |
| Plac-mirt-traz      | 0.201 | 0.683 | 0.294 | 0.769 | (0.00,1.54) | 0.125 |
| Plac-cita-fluo      | 0.198 | 0.432 | 0.457 | 0.648 | (0.00,1.04) | 0.037 |
| Plac-agom-fluo      | 0.189 | 0.278 | 0.680 | 0.496 | (0.00,0.73) | 0.000 |
| paro-traz-venl      | 0.183 | 0.604 | 0.303 | 0.762 | (0.00,1.37) | 0.000 |
| mirt-paro-traz      | 0.179 | 0.651 | 0.275 | 0.784 | (0.00,1.45) | 0.000 |
| Plac-traz-venl      | 0.176 | 0.638 | 0.275 | 0.783 | (0.00,1.43) | 0.114 |
| fluv-mirt-sert      | 0.145 | 1.870 | 0.078 | 0.938 | (0.00,3.81) | 0.623 |
| Plac-amit-sert      | 0.142 | 0.345 | 0.413 | 0.680 | (0.00,0.82) | 0.091 |
| fluo-fluv-mirt      | 0.124 | 1.102 | 0.113 | 0.910 | (0.00,2.28) | 0.000 |
| dulo-fluo-venl      | 0.118 | 1.135 | 0.104 | 0.917 | (0.00,2.34) | 0.006 |
| Plac-mirt-paro      | 0.117 | 0.313 | 0.375 | 0.708 | (0.00,0.73) | 0.000 |
| amit-bupr-paro      | 0.079 | 1.324 | 0.060 | 0.952 | (0.00,2.67) | 0.000 |
| cita-clom-venl      | 0.060 | 1.802 | 0.033 | 0.974 | (0.00,3.59) | 0.000 |
| esci-fluo-venl      | 0.059 | 0.476 | 0.125 | 0.901 | (0.00,0.99) | 0.018 |
| amit-bupr-esci-sert | 0.055 | 1.492 | 0.037 | 0.970 | (0.00,2.98) | 0.130 |
| Plac-dulo-paro      | 0.045 | 0.241 | 0.188 | 0.851 | (0.00,0.52) | 0.000 |
| fluo-paro-rebo      | 0.045 | 0.454 | 0.100 | 0.921 | (0.00,0.94) | 0.130 |
| Plac-fluo-venl      | 0.033 | 0.247 | 0.135 | 0.893 | (0.00,0.52) | 0.078 |
| amit-mirt-paro      | 0.028 | 0.398 | 0.071 | 0.944 | (0.00,0.81) | 0.000 |
| Plac-amit-venl      | 0.027 | 0.602 | 0.045 | 0.964 | (0.00,1.21) | 0.158 |
| Plac-fluv-paro      | 0.024 | 0.574 | 0.042 | 0.967 | (0.00,1.15) | 0.000 |
| amit-mirt-venl      | 0.024 | 0.592 | 0.040 | 0.968 | (0.00,1.18) | 0.000 |
| clom-miln-paro      | 0.018 | 0.615 | 0.029 | 0.977 | (0.00,1.22) | 0.000 |
| bupr-esci-paro      | 0.017 | 1.202 | 0.014 | 0.989 | (0.00,2.37) | 0.364 |
| fluo-paro-sert      | 0.016 | 0.606 | 0.026 | 0.979 | (0.00,1.20) | 0.000 |
| bupr-esci-venl      | 0.015 | 1.355 | 0.011 | 0.991 | (0.00,2.67) | 0.654 |
| fluo-sert-venl      | 0.006 | 0.511 | 0.011 | 0.991 | (0.00,1.01) | 0.000 |
| fluo-nefa-sert      | 0.005 | 0.790 | 0.006 | 0.995 | (0.00,1.55) | 0.000 |

#### 7.4.5.2 Side-splitting

| Side      | Direct   |           | Indirect |           | Difference |           |       |
|-----------|----------|-----------|----------|-----------|------------|-----------|-------|
|           | Coef.    | Std. Err. | Coef.    | Std. Err. | Coef.      | Std. Err. | P> z  |
| Plac agom | .0368342 | .1771775  | .2384122 | .1646743  | -.201578   | .2422192  | 0.405 |
| Plac amit | .9994015 | .1673345  | .9948111 | .1255082  | .0045904   | .2118561  | 0.983 |
| Plac bupr | .6739476 | .1851941  | .8414251 | .2652018  | -.1674776  | .3268148  | 0.608 |
| Plac cita | .7878851 | .2203316  | .3777655 | .2003561  | .4101196   | .3078968  | 0.183 |
| Plac clom | -.117783 | 1.083012  | 1.371263 | .1805781  | -1.489046  | 1.097963  | 0.175 |
| Plac dulo | .6789495 | .1268085  | 1.111076 | .1664644  | -.4321269  | .2152391  | 0.045 |
| Plac esci | .5580632 | .1458396  | .35059   | .169294   | .2074732   | .2285179  | 0.364 |
| Plac fluo | .5315609 | .1137867  | .5142279 | .1023526  | .017333    | .1550585  | 0.911 |
| Plac fluv | 1.135195 | .2107863  | .7251524 | .1940882  | .4100428   | .2863476  | 0.152 |
| Plac mirt | .4381218 | .1953816  | .8470265 | .1474625  | -.4089047  | .2490433  | 0.101 |
| Plac nefa | .521457  | .2310991  | 1.019478 | .2963012  | -.4980207  | .3757358  | 0.185 |
| Plac paro | .7043564 | .093708   | .7566027 | .1020084  | -.0522462  | .1404567  | 0.710 |
| Plac rebo | .742254  | .1801749  | 1.268105 | .2396442  | -.5258515  | .3083804  | 0.088 |
| Plac sert | .9433967 | .1637246  | .3413535 | .1514809  | .6020432   | .2265209  | 0.008 |
| Plac traz | 1.251293 | .2990593  | .907548  | .2174225  | .3437446   | .3780128  | 0.363 |
| Plac venl | .9973621 | .1292609  | .9760276 | .1116891  | .0213345   | .1731546  | 0.902 |
| Plac vort | .3991385 | .1493948  | .5495124 | .2864206  | -.1503739  | .3346712  | 0.653 |
| agom dulo | .0716558 | .444745   | .7724352 | .1558532  | -.7007793  | .4712625  | 0.137 |
| agom esci | 1.183167 | .5117796  | .2388736 | .1607456  | .9442938   | .5364406  | 0.078 |

|                                                                          |
|--------------------------------------------------------------------------|
| agom fluo .3361908 .2437035 .3933197 .1522884 -.0571289 .2876512 0.843   |
| agom paro .2391442 .2292214 .7309795 .1503746 -.4918353 .273475 0.072    |
| agom venl 1.300315 .4093664 .7821962 .1449299 .5181192 .4342336 0.233    |
| amit bupr .483416 1.194528 -.2833206 .1770446 .7667366 1.207577 0.525    |
| amit fluo-1.068725 .282084 -.3690595 .1186784 -.6996653 .3059999 0.022   |
| amit fluv- .5674969 .3451656 .0486081 .1794009 -.616105 .3890209 0.113   |
| amit miln- .5868074 .7995766 -.5642671 .2204212 -.0225404 .8294022 0.978 |
| amit mirt- .3316328 .3015131 -.2907855 .1537206 -.0408473 .3381541 0.904 |
| amit paro- .0189716 .1770262 -.3923627 .1261221 .3733912 .2167599 0.085  |
| amit sert- .1673621 .1908589 -.5316114 .1649528 .3642493 .2524355 0.149  |
| amit traz- .0861581 .4721936 .0542414 .2034784 -.1403995 .5141011 0.785  |
| amit venl .005513 .502289 -.0123089 .1227268 .0178219 .5170664 0.973     |
| bupr esci- .4031209 .4387582 -.2319817 .1949775 -.1711391 .4807404 0.722 |
| bupr fluo -.298959 .3965199 -.1891581 .1765325 -.1098009 .4351711 0.801  |
| bupr paro- .5487822 .6414033 .0353194 .1651753 -.5841016 .6623301 0.378  |
| bupr traz .3263267 .4971493 .2930618 .2374161 .0332649 .55093 0.952      |
| bupr venl .6167635 .4566186 .2020895 .1758405 .414674 .489306 0.397      |
| cita clom 2.269275 1.520907 .7334024 .2250649 1.535872 1.53747 0.318     |
| cita esci- .1014954 .2597697 -.0920975 .204482 -.0093979 .3303741 0.977  |
| cita fluo- .4884944 .3685151 .0487214 .1672701 -.5372158 .4047845 0.184  |
| cita fluv .5884544 .4234505 .289647 .2105816 .2988074 .4729217 0.527     |
| cita mirt .6931453 .6674609 .0906886 .1821399 .6024567 .6918663 0.384    |
| cita paro .6260824 .5309617 .1219115 .1591277 .5041709 .5545114 0.363    |
| cita sert .8541692 .9063854 .024764 .1785865 .8294051 .9235949 0.369     |
| cita venl 1.854524 .8678957 .3701911 .1619565 1.484333 .8828773 0.093    |
| cita vila .4294403 .4015273 .0851854 .3100165 .3442548 .5093124 0.499    |
| clom fluo-1.195078 .5199162 -.7552473 .1946524 -.4398303 .5551573 0.428  |
| clom fluv .747194 1.289608 -.4527268 .224205 1.199921 1.308952 0.359     |
| clom miln -.650583 .5981236 -.9517271 .2702543 .3011441 .6563453 0.646   |
| clom paro- .5826601 .2344708 -.6274839 .2581198 .0448238 .348652 0.898   |
| clom sert- .8180359 .4392723 -.6842149 .2186526 -.133821 .490727 0.785   |
| clom venl- .4744547 .5879405 -.3314267 .198156 -.1430281 .6204352 0.818  |
| desv dulo .808185 .4091193 .2462568 .2268308 .5619282 .4679017 0.230     |
| dulo esci- .7638434 .2780351 -.2515276 .1540117 -.5123159 .3179542 0.107 |
| dulo fluo-1.012427 .9848392 -.3081431 .1186403 -.7042837 .9933554 0.478  |
| dulo paro .0082135 .2191539 -.1547067 .1287655 .1629202 .2549911 0.523   |
| dulo venl- .6927157 .2944473 .2946754 .125998 -.9873911 .3202784 0.002   |
| dulo vort- .0756807 .1842195 -.8069424 .2033783 .7312617 .2754692 0.008  |
| esci fluo .3071848 .3123055 .0075518 .1317678 .299633 .3388543 0.377     |
| esci paro- .2521645 .431949 .3033944 .1254927 -.5555589 .4504239 0.217   |
| esci sert- .2017458 .4653987 .1913036 .1559822 -.3930495 .4912991 0.424  |
| esci venl .8300667 .3773687 .4757893 .1350119 .3542774 .4007747 0.377    |
| fluo fluv- .0416727 1.047248 .401427 .1562435 -.4430997 1.058839 0.676   |
| fluo miln- .4567047 .3878018 .0423891 .2340129 -.4990938 .452928 0.270   |
| fluo mirt .2968483 .2652595 .1417448 .1392922 .1551035 .299853 0.605     |
| fluo nefa .1851867 .6161665 .188382 .2024422 -.0031953 .6485709 0.996    |
| fluo paro .2421431 .1606138 .1928264 .0982577 .0493167 .187703 0.793     |
| fluo rebo .5618311 .2677049 .3462549 .1804253 .2155762 .3257239 0.508    |
| fluo sert- .3571537 .3020124 .1865023 .1326979 -.543656 .3294498 0.099   |
| fluo traz .0812856 .4868728 .5729973 .1914961 -.4917117 .5233253 0.347   |
| fluo venl .4369159 .1529482 .4787403 .1176804 -.0418244 .1932453 0.829   |
| fluv miln -.823075 .5863681 -.4201645 .252222 -.4029105 .6382351 0.528   |
| fluv mirt .5123113 .3788996 -.3957739 .1881258 .9080852 .4230644 0.032   |
| fluv paro- .3826246 .564582 -.1700294 .1565494 -.2125952 .5860024 0.717  |
| fluv sert- .8415077 .8107806 -.2671259 .176853 -.5743818 .8298501 0.489  |
| miln paro .0943881 .2713632 .5114988 .2786245 -.4171108 .3889656 0.284   |
| mirt paro .3548524 .2756223 -.0460458 .1350286 .4008982 .3068146 0.191   |
| mirt sert -1.4976 .5570794 .0318482 .153778 -1.529448 .5779145 0.008     |
| mirt traz .5106705 .5105894 .3000682 .2129035 .2106023 .5539976 0.704    |
| mirt venl .3734287 .2780177 .2646563 .1449682 .1087723 .3135438 0.729    |
| nefa paro- .3145918 .4380565 .0948154 .2097582 -.4094072 .4855787 0.399  |
| nefa sert- .5389951 .501241 -.0002533 .223432 -.5387418 .5487845 0.326   |
| paro rebo .3118461 .2325733 .142371 .1846674 .1694751 .2966311 0.568     |
| paro sert- .6357388 .5746065 -.0848512 .1228977 -.5508876 .5865767 0.348 |
| paro traz .3552921 .431924 .2894249 .1936733 .0658672 .4733207 0.889     |
| paro venl -.233858 .2943236 .3131965 .1008622 -.5470545 .3111609 0.079   |
| rebo venl .0761883 .625335 .0470955 .1618875 .0290928 .64595 0.964       |
| sert traz-1.203963 .8694493 .4951407 .2016529 -1.699104 .8925278 0.057   |
| sert venl .8204079 .4450608 .322584 .1351633 .497824 .4651352 0.284      |
| traz venl -.410494 .4693935 .0219081 .1978134 -.432402 .5099875 0.397    |
| venl vort- .9806834 .3097823 -.4368283 .1592761 -.5438551 .3479028 0.118 |

### 7.4.5.3 Design-by-treatment test

$$\text{chi2}(130) = 171.38$$

$$\text{Prob} > \text{chi2} = 0.0008$$

## 7.5 Comparison-adjusted funnel plots (all drugs vs placebo)

The funnel plots pertain to all trials comparing at least one antidepressant versus placebo. In the case of multi-arm trials which compared, for example, placebo vs drug A vs drug B, we plotted placebo vs A as well as placebo vs B.

The comparison-adjusted funnel plots against placebo suggest that there might be small-study effects for “efficacy continuous” but not for the other outcomes. The asymmetry in the funnel plot of response is primarily driven by one study.

### 7.5.1 Response

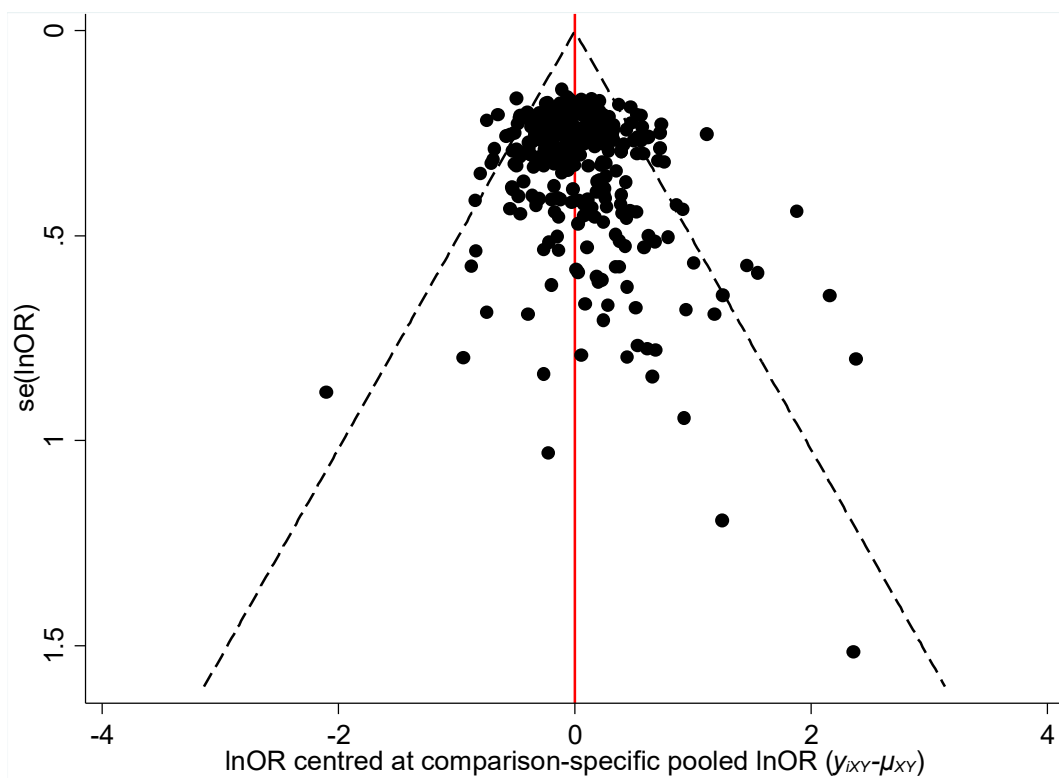

### 7.5.2 Dropouts for any reason

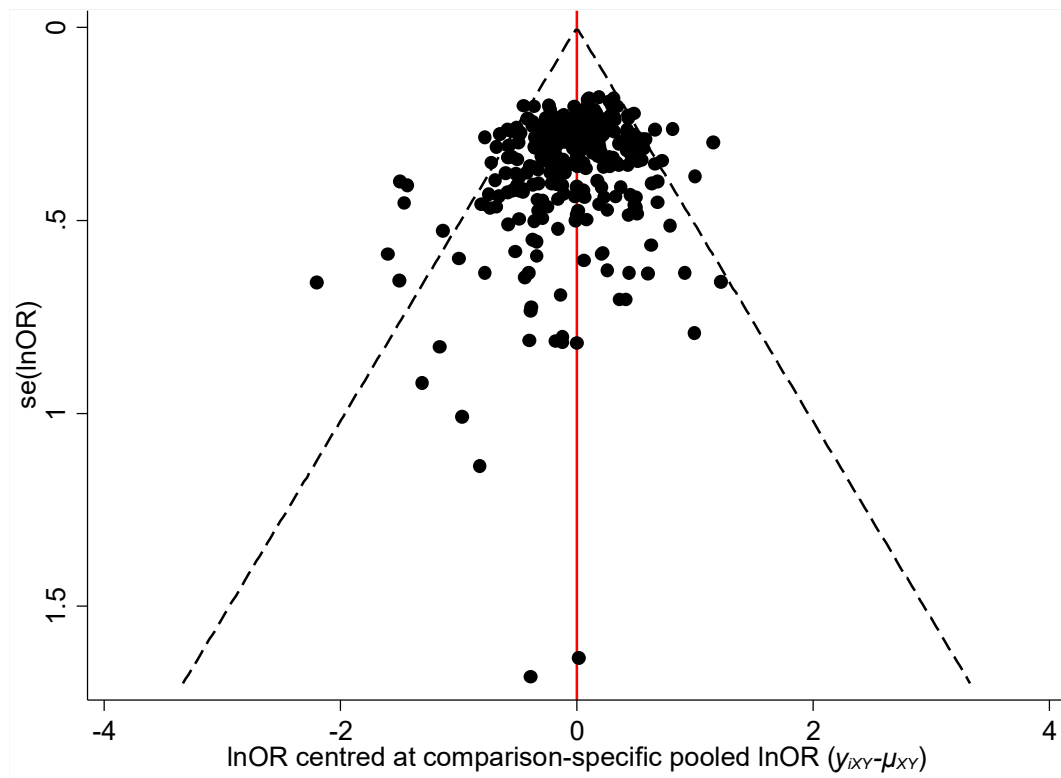

### 7.5.3 Efficacy continuous

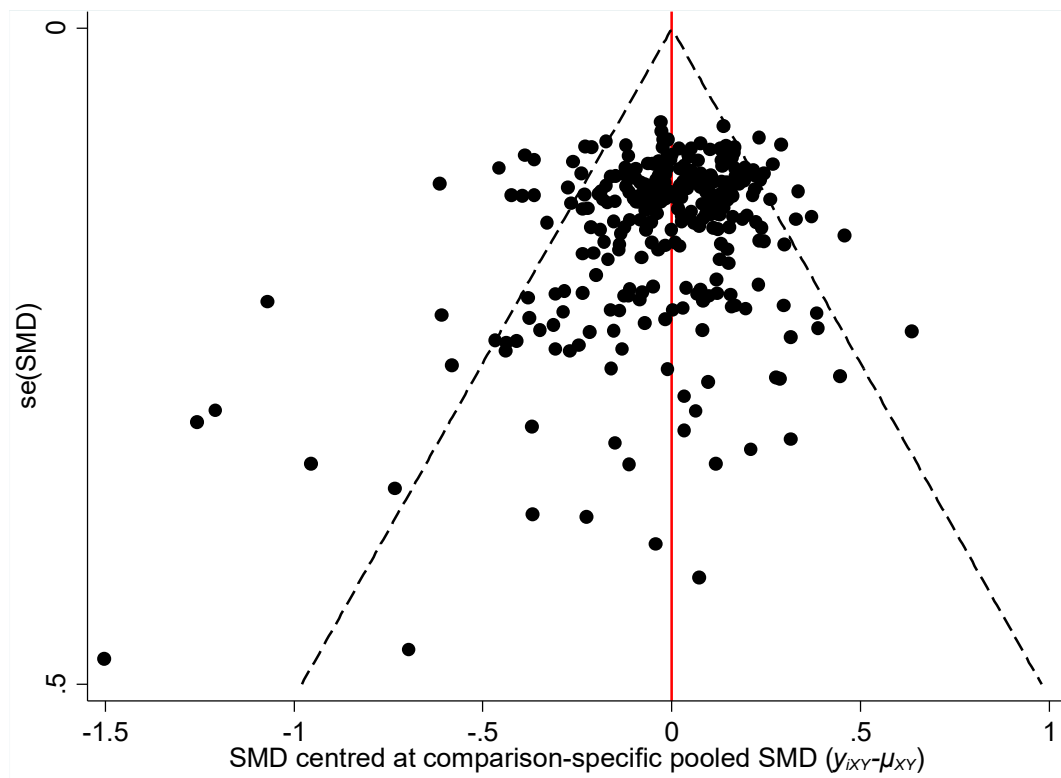

### 7.5.4 Remission

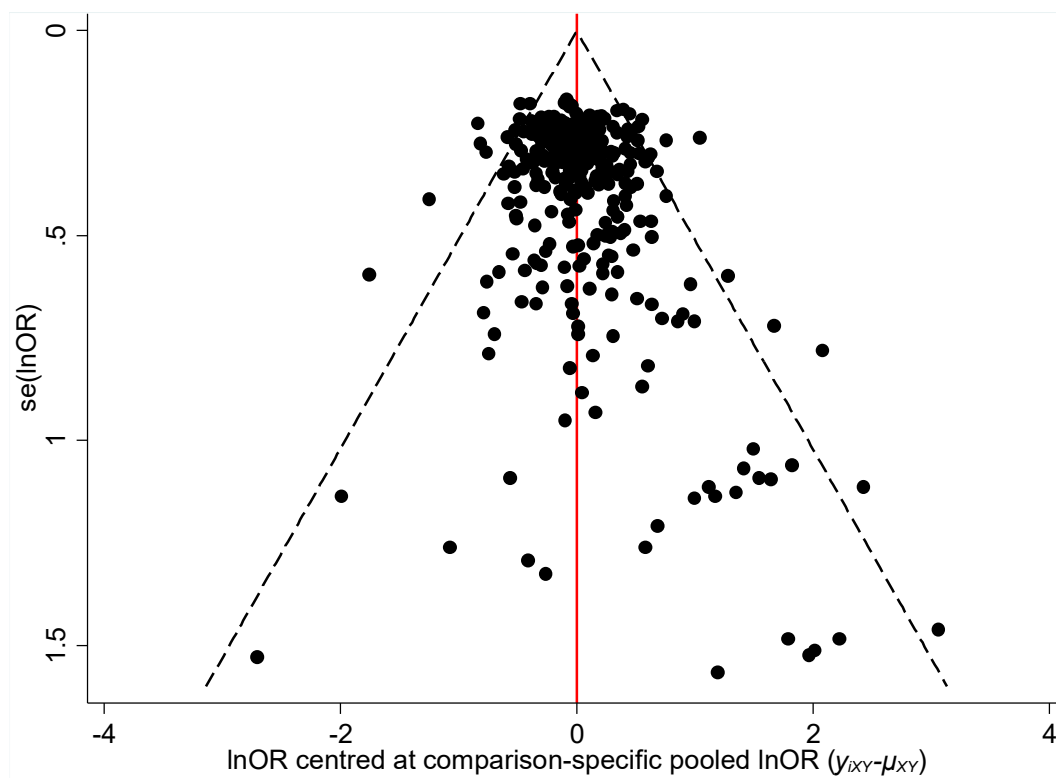

### 7.5.5 Dropouts due to adverse events

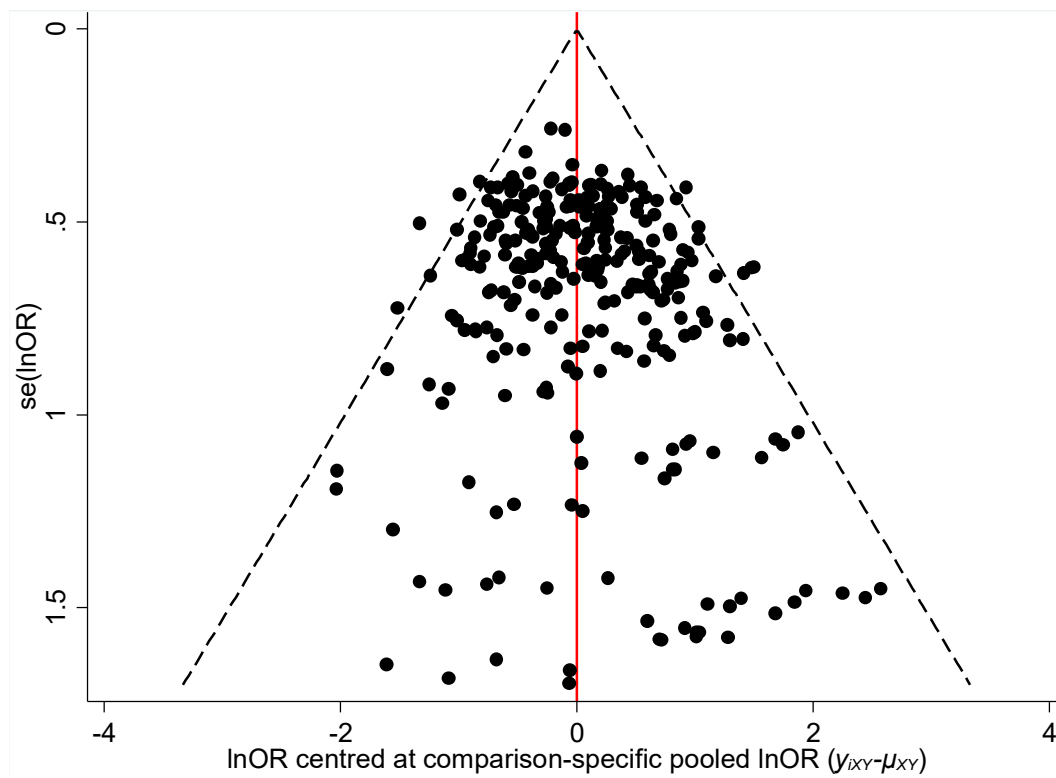

## 7.6 Meta-regressions and sensitivity analyses

To decide upon the impact of variables we consider the meta-regression results and subgroup analysis results and we judged

(a) whether heterogeneity is explained compared to the unadjusted analysis as reflected on the relative % change in the variance presented in section 7.6.2

(b) the changes in the estimated median ORs of active versus placebo

(c) the magnitude and significance of the regression coefficients when estimated/relevant (section 7.6.2).

Preplanned analyses including studies at low risk of bias only were not performed because very few studies would have been included compared to the total sample (39 studies).

### 7.6.1 Statistical details for network meta-analysis and meta-regression models

All models presented below (apart from the model accounting for the effect of novelty) pertain to meta-regressions with consistent coefficients. The basic coefficients (for each drug vs placebo) were assumed independent for comparisons with sufficient data and exchangeable for comparisons with few data for which coefficients were not estimable. Specifically, we first ran all models assuming all coefficients being independent. Subsequently, we ran again the meta-regression models and we assumed exchangeable those coefficients ( $\log(\beta)$ ) with lower or upper credible interval value exceeding the value of -20 or 20 respectively. For the novelty effect model we used exchangeable coefficients for the effect of novel/experimental versus older/control intervention.

For every study  $i = 1, \dots, N$  we denote with  $r_{i,k}$  the number of events in arm  $k = 1, \dots, K$  and  $n_{i,k}$  is the sample size in arm  $k$ .

Binomial Likelihood:  $r_{i,k} \sim \text{Binom}(\pi_{i,k}, n_{i,k})$

Parameterization:

$$\begin{aligned} \text{logit}(\pi_{i,1}) &= u_i \\ \text{logit}(\pi_{i,k}) &= u_i + \theta_{i,k}^* \quad \text{for } k \geq 2, \end{aligned}$$

Random effects distribution:

For the model without covariates we set  $\theta_{i,k}^* = \theta_{i,k}$

$$\theta_{i,2}, \dots, \theta_{i,K} \sim \text{MVN}(\mu_2, \dots, \mu_K, \mathbf{T})$$

The matrix  $T$  involves the heterogeneity standard deviation  $\tau$

Consistency Equations: Each  $\mu_2, \dots, \mu_K$  corresponds into a treatment comparison, e.g.  $\mu_k \equiv \mu_{AB}$  then we assume consistency by putting  $\mu_{AB} = d_A - d_B$ , with  $d_A = 0$  for an arbitrarily selected reference treatment.

Model for study-level moderators:  $\theta_{i,k}^* = \theta_{i,k} + \log(\beta_{1,k})x_{i,k}$

if treatment 1 is placebo,  $\log(\beta_{1,\kappa}) = \log(\beta_\kappa)$

if treatment 1  $\neq$  placebo,  $\log(\beta_{1,\kappa}) \equiv \log(\beta_{AB}) = \log(\beta_B) - \log(\beta_A)$  for any active treatments  $A, B$

(assumption of consistent coefficients)

The dependant variable  $x_{i,k}$  is defined as:

$$\text{for small-study effects: } x_{i,k} = \frac{1}{r_{i,k}} + \frac{1}{r_{i,1}} + \frac{1}{n_{i,k}-r_{i,k}} + \frac{1}{n_{i,1}-r_{i,1}}$$

for other continuous characteristics:  $x_{i,k} \equiv x_i = \text{value}_i - (\text{value of centralization})$  (the value of centralization is given before three results)

$$\text{for sponsorship: } x_{i,k} = \frac{I_{i,1}-I_{i,k}}{2}, \text{ with } I_{i,k} = \begin{cases} 1, & \text{if treatment } k \text{ is sponsored in study } i \\ -1, & \text{if treatment } k \text{ is non - sponsored in } i \end{cases}$$

$$\text{for single/multi-centre trials: } x_{i,k} \equiv x_i = \begin{cases} 1, & \text{if study } i \text{ single - centre} \\ 0, & \text{if study } i \text{ multi - centre} \end{cases}$$

There are cases where there are not enough data to estimate separate  $\beta_A, \beta_B$ , etc. We assumed to be exchangeable any coefficients to improve power and estimation (relevant information is presented before the results). For example, we assumed that  $\beta_A, \beta_B$  are exchangeable  $\log\beta_A \sim N(\log B, \tau_B^2)$ ,  $\log\beta_B \sim N(\log B, \tau_B^2)$

Model for novel agent effects:  $\theta_{i,k}^* = \theta_{i,k} + \log(\beta_{i,1,\kappa})x_{i,k}$

if treatment 1 is placebo,  $\log(\beta_{i,1,\kappa}) = 0$

if treatment 1  $\neq$  placebo,  $\log(\beta_{i,1,\kappa}) \sim N(\log(\beta_{1,\kappa}), \tau_{\log\beta_{1,\kappa}}^2)$

for any active treatments  $A, B$   $\log(\beta_{1,\kappa}) \equiv \log(\beta_{AB}) = \log(B)$ ,  $\tau_{\log\beta_{1,\kappa}}^2 \equiv \tau_{\log\beta_{AB}}^2 = \tau_B^2$

priors:  $\log(B) \sim N(0, 10^4)$ ,  $\tau_B^2 \sim U(0, 5)$

$$x_{i,k} = \frac{I_{i,1}-I_{i,k}}{2}, \text{ with } I_{i,k} = \begin{cases} 1, & \text{if treatment } k \text{ is novel/experimental in study } i \\ -1, & \text{if treatment } k \text{ is old/comparator in study } i \end{cases}$$

Priors:

We assume vague normal priors  $N(0, 10^4)$  for the parameters  $u_i$  and  $d_B, d_C, d_D, \dots$

if  $\beta_A$  is assumed independent  $\log(\beta_A) \sim N(0, 10^4)$

if  $\beta_A, \beta_B$  are assumed exchangeable  $\log\beta_A \sim N(\log B, \tau_B^2)$ ,  $\log\beta_B \sim N(\log B, \tau_B^2)$

$\log B \sim N(0, 10^4)$ ,  $\tau_B^2 \sim U(0, 5)$

$\tau \sim U(0, 5)$

## 7.6.2 Changes in heterogeneity after accounting for potential effect modifiers

| Covariate | Heterogeneity standard deviation (median and 95% CrI) | Relative change in the variance |
|-----------|-------------------------------------------------------|---------------------------------|
|           |                                                       |                                 |



| <i>Response</i>                                                                    |                         |            |
|------------------------------------------------------------------------------------|-------------------------|------------|
| None                                                                               | 0.21 (0.17,0.25)        | -          |
| Study variance                                                                     | 0.19 (0.15,0.24)        | 10%        |
| Year                                                                               | <b>0.18 (0.13,0.22)</b> | <b>14%</b> |
| Sponsorship                                                                        | 0.21 (0.17,0.26)        | 0%         |
| Probability of receiving placebo                                                   | 0.20 (0.16,0.24)        | 5%         |
| Dosing Schedule                                                                    | 0.21 (0.16,0.25)        | 0%         |
| Accounting for novel/experimental agent effects                                    | 0.20 (0.16,0.24)        | 5%         |
| Excluding studies with no unpublished data                                         | 0.21 (0.16,0.26)        | 0%         |
| Excluding studies with imputed number of responders                                | 0.21 (0.17,0.26)        | 0%         |
| Excluding placebo-controlled trials                                                | <b>0.16 (0.04,0.25)</b> | <b>24%</b> |
| Including only studies with low to moderate average severity at baseline (HAMD≤24) | 0.25 (0.19,0.32)        | 0%         |
| Including only studies with high average severity at baseline (HAMD>24)            | 0.24 (0.19,0.30)        | 0%         |
| Multi-center vs single center trials                                               | 0.20 (0.16,0.24)        | 5%         |
| Including all studies with accepted dose range                                     | 0.20 (0.17,0.24)        | 5%         |
| <i>Dropout</i>                                                                     |                         |            |
| None                                                                               | 0.20 (0.15,0.25)        | -          |
| Study variance                                                                     | 0.19 (0.14,0.24)        | 5%         |
| Year                                                                               | 0.19 (0.14,0.24)        | 5%         |
| Sponsorship                                                                        | 0.20 (0.14,0.25)        | 0%         |
| Probability of receiving placebo                                                   | 0.19 (0.14,0.24)        | 5%         |
| Dosing Schedule                                                                    | 0.19 (0.14,0.24)        | 5%         |
| Excluding studies with no unpublished data                                         | 0.18 (0.11,0.24)        | 10%        |
| Excluding placebo-controlled trials                                                | <b>0.11 (0.01,0.23)</b> | <b>45%</b> |
| Including only studies with low to moderate average severity at baseline (HAMD≤24) | 0.26 (0.18,0.34)        | 0%         |
| Including only studies with high average severity at baseline (HAMD>24)            | 0.20 (0.13,0.27)        | 0%         |
| Multi-center vs single center trials                                               | 0.18 (0.13,0.24)        | 10%        |
| Including all studies with accepted dose range                                     | 0.20 (0.15,0.25)        | 0%         |

### 7.6.3 Sensitivity analyses

#### 7.6.3.1 Excluding studies with no unpublished data

|  | Response       |        |       |                    |        |       | Dropouts for any reason |        |       |                    |        |       |
|--|----------------|--------|-------|--------------------|--------|-------|-------------------------|--------|-------|--------------------|--------|-------|
|  | OR drug vs PLA |        |       | beta of comparison |        |       | OR drug vs PLA          |        |       | beta of comparison |        |       |
|  | 2.5%           | median | 97.5% | 2.5%               | median | 97.5% | 2.5%                    | median | 97.5% | 2.5%               | median | 97.5% |

|                 |      |      |      |  |      |      |      |
|-----------------|------|------|------|--|------|------|------|
| Agomelatine     | 1.33 | 1.53 | 1.76 |  | 0.76 | 0.89 | 1.03 |
| Amitriptyline   | 1.65 | 2.05 | 2.56 |  | 0.69 | 0.87 | 1.08 |
| Bupropion       | 1.20 | 1.43 | 1.71 |  | 0.80 | 0.96 | 1.15 |
| Citalopram      | 1.27 | 1.49 | 1.74 |  | 0.84 | 1.01 | 1.19 |
| Clomipramine    | 0.90 | 1.31 | 1.88 |  | 1.02 | 1.46 | 2.11 |
| Desvenlafaxine  | 1.16 | 1.49 | 1.90 |  | 1.07 | 1.39 | 1.81 |
| Duloxetine      | 1.61 | 1.81 | 2.04 |  | 1.00 | 1.13 | 1.29 |
| Escitalopram    | 1.43 | 1.62 | 1.85 |  | 0.86 | 0.99 | 1.13 |
| Fluoxetine      | 1.27 | 1.43 | 1.61 |  | 0.80 | 0.91 | 1.02 |
| Fluvoxamine     | 0.94 | 1.36 | 1.97 |  | 0.83 | 1.20 | 1.75 |
| Levomilnacipran | 1.24 | 1.59 | 2.05 |  | 0.94 | 1.19 | 1.52 |
| Milnacipran     | -    | -    | -    |  | -    | -    | -    |
| Mirtazapine     | 1.46 | 1.74 | 2.08 |  | 0.86 | 1.02 | 1.21 |
| Nefazodone      | 1.23 | 1.69 | 2.34 |  | 0.62 | 0.85 | 1.17 |
| Paroxetine      | 1.51 | 1.66 | 1.84 |  | 0.90 | 0.99 | 1.09 |
| Reboxetine      | 1.11 | 1.32 | 1.58 |  | 0.99 | 1.19 | 1.42 |
| Sertraline      | 1.29 | 1.60 | 1.97 |  | 0.82 | 1.01 | 1.23 |
| Trazodone       | 0.94 | 1.38 | 2.02 |  | 0.95 | 1.40 | 2.05 |
| Venlafaxine     | 1.49 | 1.70 | 1.94 |  | 0.93 | 1.06 | 1.21 |
| Vilazodone      | 1.09 | 1.44 | 1.90 |  | 0.92 | 1.26 | 1.71 |
| Vortioxetine    | 1.43 | 1.65 | 1.91 |  | 0.88 | 1.03 | 1.20 |

(230 studies included for response)

(264 studies included for dropout)

### 7.6.3.2 Excluding studies with imputed response

|                 | Response       |        |       |                    |        |       |
|-----------------|----------------|--------|-------|--------------------|--------|-------|
|                 | OR drug vs PLA |        |       | beta of comparison |        |       |
|                 | 2.5%           | median | 97.5% | 2.5%               | median | 97.5% |
| Agomelatine     | 1.48           | 1.69   | 1.94  |                    |        |       |
| Amitriptyline   | 1.87           | 2.16   | 2.49  |                    |        |       |
| Bupropion       | 1.32           | 1.57   | 1.87  |                    |        |       |
| Citalopram      | 1.35           | 1.60   | 1.88  |                    |        |       |
| Clomipramine    | 1.18           | 1.53   | 1.99  |                    |        |       |
| Desvenlafaxine  | 1.21           | 1.46   | 1.77  |                    |        |       |
| Duloxetine      | 1.68           | 1.88   | 2.11  |                    |        |       |
| Escitalopram    | 1.55           | 1.76   | 2.01  |                    |        |       |
| Fluoxetine      | 1.42           | 1.56   | 1.71  |                    |        |       |
| Fluvoxamine     | 1.40           | 1.76   | 2.20  |                    |        |       |
| Levomilnacipran | 1.24           | 1.59   | 2.05  |                    |        |       |
| Milnacipran     | 1.46           | 1.95   | 2.62  |                    |        |       |

|              |      |      |      |
|--------------|------|------|------|
| Mirtazapine  | 1.73 | 2.04 | 2.41 |
| Nefazodone   | 1.39 | 1.87 | 2.52 |
| Paroxetine   | 1.66 | 1.82 | 2.00 |
| Reboxetine   | 1.18 | 1.40 | 1.67 |
| Sertraline   | 1.52 | 1.73 | 1.96 |
| Trazodone    | 1.25 | 1.55 | 1.92 |
| Venlafaxine  | 1.67 | 1.85 | 2.06 |
| Vilazodone   | 1.33 | 1.84 | 2.56 |
| Vortioxetine | 1.45 | 1.68 | 1.93 |

(321 studies included for response)

### 7.6.3.3 Adjusted for effect of novel agents

|                 | Response       |        |       |                    |        |       |
|-----------------|----------------|--------|-------|--------------------|--------|-------|
|                 | OR drug vs PLA |        |       | beta of comparison |        |       |
|                 | 2.5%           | median | 97.5% | 2.5%               | median | 97.5% |
| Agomelatine     | 1.37           | 1.56   | 1.78  | 1.09               | 1.18   | 1.27  |
| Amitriptyline   | 2.07           | 2.36   | 2.68  |                    |        |       |
| Bupropion       | 1.31           | 1.54   | 1.80  |                    |        |       |
| Citalopram      | 1.33           | 1.52   | 1.74  |                    |        |       |
| Clomipramine    | 1.40           | 1.76   | 2.22  |                    |        |       |
| Desvenlafaxine  | 1.24           | 1.48   | 1.78  |                    |        |       |
| Duloxetine      | 1.64           | 1.84   | 2.05  |                    |        |       |
| Escitalopram    | 1.43           | 1.59   | 1.78  |                    |        |       |
| Fluoxetine      | 1.47           | 1.60   | 1.75  |                    |        |       |
| Fluvoxamine     | 1.43           | 1.71   | 2.05  |                    |        |       |
| Levomilnacipran | 1.25           | 1.59   | 2.03  |                    |        |       |
| Milnacipran     | 1.20           | 1.55   | 1.99  |                    |        |       |
| Mirtazapine     | 1.50           | 1.74   | 2.03  |                    |        |       |
| Nefazodone      | 1.25           | 1.59   | 2.02  |                    |        |       |
| Paroxetine      | 1.63           | 1.76   | 1.91  |                    |        |       |
| Reboxetine      | 1.11           | 1.32   | 1.57  |                    |        |       |
| Sertraline      | 1.46           | 1.64   | 1.84  |                    |        |       |
| Trazodone       | 1.27           | 1.54   | 1.87  |                    |        |       |
| Venlafaxine     | 1.65           | 1.83   | 2.03  |                    |        |       |
| Vilazodone      | 1.28           | 1.60   | 1.99  |                    |        |       |
| Vortioxetine    | 1.43           | 1.65   | 1.89  |                    |        |       |

Adjustment took place only in head-to-head trials. To increase power we did not account for differences between the interventions but assumed a single coefficient B for the effect of novel/experimental over older/control trial interventions which was estimated at B= 1.18 (1.09,1.28)

All coefficients were assumed exchangeable.

#### 7.6.3.4 Including all the studies that used the drugs within the accepted doses

|                 | Response       |        |       |                    |        |       | Dropouts for any reason |        |       |                    |        |       |
|-----------------|----------------|--------|-------|--------------------|--------|-------|-------------------------|--------|-------|--------------------|--------|-------|
|                 | OR drug vs PLA |        |       | beta of comparison |        |       | OR drug vs PLA          |        |       | beta of comparison |        |       |
|                 | 2.5%           | median | 97.5% | 2.5%               | median | 97.5% | 2.5%                    | median | 97.5% | 2.5%               | median | 97.5% |
| Agomelatine     | 1.44           | 1.64   | 1.87  |                    |        |       | 0.72                    | 0.84   | 0.97  |                    |        |       |
| Amitriptyline   | 1.92           | 2.14   | 2.38  |                    |        |       | 0.88                    | 0.99   | 1.11  |                    |        |       |
| Bupropion       | 1.40           | 1.58   | 1.80  |                    |        |       | 0.85                    | 0.97   | 1.11  |                    |        |       |
| Citalopram      | 1.39           | 1.57   | 1.77  |                    |        |       | 0.81                    | 0.94   | 1.08  |                    |        |       |
| Clomipramine    | 1.27           | 1.56   | 1.91  |                    |        |       | 0.94                    | 1.21   | 1.55  |                    |        |       |
| Desvenlafaxine  | 1.24           | 1.49   | 1.78  |                    |        |       | 0.88                    | 1.08   | 1.33  |                    |        |       |
| Duloxetine      | 1.65           | 1.85   | 2.07  |                    |        |       | 0.96                    | 1.08   | 1.22  |                    |        |       |
| Escitalopram    | 1.51           | 1.68   | 1.87  |                    |        |       | 0.81                    | 0.91   | 1.03  |                    |        |       |
| Fluoxetine      | 1.41           | 1.52   | 1.65  |                    |        |       | 0.80                    | 0.88   | 0.96  |                    |        |       |
| Fluvoxamine     | 1.41           | 1.68   | 2.01  |                    |        |       | 0.93                    | 1.12   | 1.35  |                    |        |       |
| Levomilnacipran | 1.24           | 1.59   | 2.04  |                    |        |       | 0.93                    | 1.19   | 1.53  |                    |        |       |
| Milnacipran     | 1.37           | 1.74   | 2.22  |                    |        |       | 0.73                    | 0.96   | 1.26  |                    |        |       |
| Mirtazapine     | 1.60           | 1.84   | 2.12  |                    |        |       | 0.85                    | 0.98   | 1.14  |                    |        |       |
| Nefazodone      | 1.23           | 1.53   | 1.90  |                    |        |       | 0.76                    | 0.94   | 1.17  |                    |        |       |
| Paroxetine      | 1.62           | 1.75   | 1.89  |                    |        |       | 0.87                    | 0.94   | 1.03  |                    |        |       |
| Reboxetine      | 1.15           | 1.36   | 1.60  |                    |        |       | 0.97                    | 1.16   | 1.39  |                    |        |       |
| Sertraline      | 1.46           | 1.62   | 1.80  |                    |        |       | 0.88                    | 0.99   | 1.11  |                    |        |       |
| Trazodone       | 1.29           | 1.55   | 1.86  |                    |        |       | 0.90                    | 1.10   | 1.36  |                    |        |       |
| Venlafaxine     | 1.59           | 1.74   | 1.91  |                    |        |       | 0.92                    | 1.01   | 1.12  |                    |        |       |
| Vilazodone      | 1.21           | 1.46   | 1.77  |                    |        |       | 0.89                    | 1.12   | 1.42  |                    |        |       |
| Vortioxetine    | 1.44           | 1.66   | 1.91  |                    |        |       | 0.86                    | 1.01   | 1.19  |                    |        |       |

(474 studies included for response)

(464 studies included for dropout)

#### 7.6.4 Summary of significance in the regression coefficients from meta-regressions

The following table has been constructed using the convention that statistically significant effects are identified by a 95% CrI that excludes the value of 1. Because of multiple-testing issues significance levels should be higher than nominal and hence this table is for presentation purposes only. Bold corresponds to coefficients that exclude a 10% relative increase or decrease in the odds (OR 1.1 or 0.9).

|  | <i>Response</i> | <i>Dropout</i> |
|--|-----------------|----------------|
|--|-----------------|----------------|

|                 | Small study effects | Year | Sponsorship | Probability of receiving placebo | Multi-center studies | Baseline severity | Small study effects | Year | Sponsorship | Prob of receiving placebo | Multicenter studies | Baseline severity |
|-----------------|---------------------|------|-------------|----------------------------------|----------------------|-------------------|---------------------|------|-------------|---------------------------|---------------------|-------------------|
| Agomelatine     |                     |      |             |                                  |                      |                   |                     |      | X           |                           |                     |                   |
| Amitriptyline   | X                   | X    |             | X                                | X                    | X                 | X                   | X    |             | X                         | X                   |                   |
| Bupropion       | X                   | X    |             |                                  |                      | X                 |                     |      |             |                           |                     |                   |
| Citalopram      |                     |      |             |                                  | X                    |                   |                     |      |             |                           | X                   |                   |
| Clomipramine    |                     |      |             |                                  |                      |                   |                     |      |             |                           |                     |                   |
| Desvenlafaxine  |                     |      |             |                                  |                      |                   |                     |      |             | X                         |                     |                   |
| Duloxetine      |                     | X    |             |                                  |                      |                   | X                   |      |             |                           |                     | X                 |
| Escitalopram    |                     |      |             |                                  |                      |                   |                     |      |             |                           |                     |                   |
| Fluoxetine      | X                   | X    |             |                                  | X                    |                   |                     | X    |             |                           | X                   | X                 |
| Fluvoxamine     | X                   |      |             | X                                |                      | X                 |                     |      |             |                           |                     |                   |
| Levomilnacipran |                     |      |             |                                  |                      |                   |                     |      |             |                           |                     |                   |
| Milnacipran     |                     |      |             |                                  |                      |                   |                     |      |             |                           |                     |                   |
| Mirtazapine     |                     |      |             |                                  |                      |                   |                     |      |             |                           |                     | X                 |
| Nefazodone      |                     |      |             |                                  |                      |                   |                     |      |             |                           |                     |                   |
| Paroxetine      |                     | X    |             |                                  | X                    |                   |                     | X    |             |                           | X                   |                   |
| Reboxetine      |                     | X    |             |                                  |                      |                   | X                   | X    |             |                           |                     | X                 |
| Sertraline      |                     | X    |             |                                  |                      |                   |                     | X    |             |                           |                     | X                 |
| Trazodone       | X                   |      |             | X                                | X                    |                   |                     |      |             |                           |                     |                   |
| Venlafaxine     |                     | X    |             |                                  |                      |                   |                     | X    |             |                           |                     |                   |
| Vilazodone      |                     |      |             |                                  |                      |                   |                     |      |             |                           |                     |                   |
| Vortioxetine    |                     |      |             |                                  |                      |                   |                     |      |             |                           |                     |                   |

### 7.6.5 Odds-ratios for response and dropout for any reason adjusted for covariates.

Percentage (%) change between adjusted and unadjusted ORs were estimated when the adjusted ORs could be considered as more 'trustworthy', e.g. when extrapolated at studies with very large sample size or estimated from multicenter studies

#### 7.6.5.1 Unadjusted

|             | Response       |        |       |                    |        |       | Dropouts for any reason |        |       |                    |        |       |
|-------------|----------------|--------|-------|--------------------|--------|-------|-------------------------|--------|-------|--------------------|--------|-------|
|             | OR drug vs PLA |        |       | beta of comparison |        |       | OR drug vs PLA          |        |       | beta of comparison |        |       |
|             | 2.5%           | median | 97.5% | 2.5%               | median | 97.5% | 2.5%                    | median | 97.5% | 2.5%               | median | 97.5% |
| Agomelatine | 1.44           | 1.65   | 1.88  |                    |        |       | 0.72                    | 0.84   | 0.97  |                    |        |       |

|                 |      |      |      |      |      |      |
|-----------------|------|------|------|------|------|------|
| Amitriptyline   | 1.89 | 2.13 | 2.41 | 0.83 | 0.95 | 1.08 |
| Bupropion       | 1.35 | 1.58 | 1.86 | 0.81 | 0.96 | 1.14 |
| Citalopram      | 1.33 | 1.52 | 1.74 | 0.80 | 0.94 | 1.09 |
| Clomipramine    | 1.21 | 1.49 | 1.85 | 1.01 | 1.30 | 1.68 |
| Desvenlafaxine  | 1.24 | 1.49 | 1.79 | 0.88 | 1.08 | 1.33 |
| Duloxetine      | 1.66 | 1.85 | 2.07 | 0.96 | 1.09 | 1.23 |
| Escitalopram    | 1.50 | 1.68 | 1.87 | 0.80 | 0.90 | 1.02 |
| Fluoxetine      | 1.40 | 1.52 | 1.66 | 0.80 | 0.88 | 0.96 |
| Fluvoxamine     | 1.41 | 1.69 | 2.02 | 0.91 | 1.10 | 1.33 |
| Levomilnacipran | 1.24 | 1.59 | 2.05 | 0.93 | 1.19 | 1.53 |
| Milnacipran     | 1.37 | 1.74 | 2.23 | 0.73 | 0.95 | 1.26 |
| Mirtazapine     | 1.64 | 1.89 | 2.20 | 0.85 | 0.99 | 1.15 |
| Nefazodone      | 1.32 | 1.67 | 2.12 | 0.72 | 0.93 | 1.19 |
| Paroxetine      | 1.61 | 1.75 | 1.90 | 0.87 | 0.95 | 1.03 |
| Reboxetine      | 1.16 | 1.37 | 1.63 | 0.96 | 1.16 | 1.40 |
| Sertraline      | 1.49 | 1.67 | 1.87 | 0.85 | 0.96 | 1.08 |
| Trazodone       | 1.25 | 1.51 | 1.83 | 0.93 | 1.15 | 1.42 |
| Venlafaxine     | 1.61 | 1.78 | 1.96 | 0.93 | 1.04 | 1.15 |
| Vilazodone      | 1.28 | 1.60 | 2.00 | 0.88 | 1.14 | 1.47 |
| Vortioxetine    | 1.45 | 1.66 | 1.92 | 0.86 | 1.01 | 1.19 |

### 7.6.5.2 Adjusted for small-study effects

|                 | Response       |        |       |                    |        |       | Dropouts for any reason |        |       |                    |        |       |
|-----------------|----------------|--------|-------|--------------------|--------|-------|-------------------------|--------|-------|--------------------|--------|-------|
|                 | OR drug vs PLA |        |       | beta of comparison |        |       | OR drug vs PLA          |        |       | beta of comparison |        |       |
|                 | 2.5%           | median | 97.5% | 2.5%               | median | 97.5% | 2.5%                    | median | 97.5% | 2.5%               | median | 97.5% |
| Agomelatine     | 1.24           | 1.53   | 1.88  | 0.03               | 2.19   | 157.9 | 0.74                    | 0.92   | 1.14  | 0.03               | 0.51   | 7.78  |
| Amitriptyline   | 1.51           | 1.75   | 2.04  | 2.40               | 7.10   | 21.12 | 0.99                    | 1.15   | 1.35  | 0.05               | 0.13   | 0.37  |
| Bupropion       | 1.11           | 1.34   | 1.62  | 1.21               | 4.56   | 19.18 | 0.87                    | 1.07   | 1.32  | 0.11               | 0.46   | 1.91  |
| Citalopram      | 1.19           | 1.45   | 1.76  | 0.02               | 1.27   | 64.39 | 0.80                    | 0.99   | 1.22  | 0.08               | 0.95   | 11.54 |
| Clomipramine    | 1.08           | 1.34   | 1.67  | -                  | -      | -     | 1.12                    | 1.46   | 1.91  | 0.01               | 0.15   | 1.75  |
| Desvenlafaxine  | 0.62           | 1.14   | 2.04  | -                  | -      | -     | 0.64                    | 1.18   | 2.18  | -                  | -      | -     |
| Duloxetine      | 1.26           | 1.56   | 1.93  | -                  | -      | -     | 1.09                    | 1.36   | 1.70  | 0.00               | 0.05   | 0.70  |
| Escitalopram    | 1.51           | 1.80   | 2.13  | 0.00               | 0.05   | 1.07  | 0.78                    | 0.94   | 1.15  | 0.10               | 1.09   | 11.95 |
| Fluoxetine      | 1.21           | 1.34   | 1.50  | 1.43               | 3.77   | 10.03 | 0.86                    | 0.97   | 1.10  | 0.15               | 0.46   | 1.41  |
| Fluvoxamine     | 1.16           | 1.42   | 1.75  | 1.04               | 3.71   | 13.79 | 1.00                    | 1.24   | 1.54  | 0.13               | 0.50   | 1.88  |
| Levomilnacipran | 1.00           | 3.52   | 14.08 | -                  | -      | -     | 0.93                    | 1.37   | 2.07  | 0.00               | 0.10   | 20.76 |
| Milnacipran     | 1.19           | 1.52   | 1.95  | -                  | -      | -     | 0.81                    | 1.06   | 1.40  | -                  | -      | -     |
| Mirtazapine     | 1.38           | 1.66   | 2.00  | 0.62               | 3.32   | 17.94 | 0.91                    | 1.12   | 1.38  | 0.05               | 0.29   | 1.88  |
| Nefazodone      | 0.97           | 1.40   | 2.02  | 0.21               | 4.66   | 102.8 | 0.73                    | 1.09   | 1.66  | 0.01               | 0.24   | 5.69  |

|              |      |      |      |      |      |       |      |      |      |      |      |       |
|--------------|------|------|------|------|------|-------|------|------|------|------|------|-------|
| Paroxetine   | 1.42 | 1.57 | 1.75 | 0.84 | 2.01 | 4.79  | 0.94 | 1.05 | 1.16 | 0.31 | 0.61 | 1.19  |
| Reboxetine   | 0.86 | 1.06 | 1.31 | -    | -    | -     | 1.22 | 1.55 | 1.97 | 0.00 | 0.03 | 0.22  |
| Sertraline   | 1.33 | 1.54 | 1.78 | 0.21 | 1.24 | 7.32  | 0.82 | 0.97 | 1.13 | 0.60 | 2.48 | 10.72 |
| Trazodone    | 1.08 | 1.32 | 1.62 | 1.13 | 2.45 | 6.48  | 1.01 | 1.30 | 1.67 | 0.05 | 0.32 | 1.86  |
| Venlafaxine  | 1.35 | 1.56 | 1.81 | 0.64 | 6.38 | 66.02 | 1.01 | 1.19 | 1.40 | 0.02 | 0.16 | 1.26  |
| Vilazodone   | 1.44 | 2.89 | 5.74 | 0.00 | 0.00 | 4.74  | 0.45 | 1.13 | 2.77 | -    | -    | -     |
| Vortioxetine | 1.06 | 1.62 | 2.48 | -    | -    | -     | 0.63 | 0.93 | 1.36 | -    | -    | -     |

\*Parameters with estimated intervals from 0 to >100 have been substituted by NA

The ORs presented are extrapolated for a study with infinite sample size (zero variance).

Then the OR of each active intervention j is multiplied by beta for one unit increase in the variance of the logOR.

Coefficients assumed exchangeable in response and dropout: beta[1,6], beta[1,12], beta[1,13]

### 7.6.5.3 Adjusted for year of studies

|                 | Response       |        |       |                    |        |       | Dropouts for any reason |        |       |                    |        |       |
|-----------------|----------------|--------|-------|--------------------|--------|-------|-------------------------|--------|-------|--------------------|--------|-------|
|                 | OR drug vs PLA |        |       | beta of comparison |        |       | OR drug vs PLA          |        |       | beta of comparison |        |       |
|                 | 2.5%           | median | 97.5% | 2.5%               | median | 97.5% | 2.5%                    | median | 97.5% | 2.5%               | median | 97.5% |
| Agomelatine     | 0.94           | 1.27   | 1.72  | 0.53               | 0.76   | 1.09  | 0.72                    | 1.05   | 1.50  | 0.80               | 1.24   | 1.91  |
| Amitriptyline   | 1.64           | 1.96   | 2.35  | 1.02               | 1.26   | 1.55  | 0.87                    | 1.07   | 1.31  | 0.62               | 0.77   | 0.96  |
| Bupropion       | 1.34           | 1.56   | 1.82  | 1.06               | 1.25   | 1.48  | 0.83                    | 0.99   | 1.17  | 0.76               | 0.92   | 1.11  |
| Citalopram      | 1.31           | 1.54   | 1.80  | 0.81               | 1.01   | 1.26  | 0.79                    | 0.95   | 1.14  | 0.73               | 0.94   | 1.22  |
| Clomipramine    | 1.18           | 1.64   | 2.28  | 0.65               | 1.05   | 1.70  | 0.89                    | 1.40   | 2.21  | 0.38               | 0.72   | 1.39  |
| Desvenlafaxine  | 1.11           | 2.04   | 3.69  | 0.80               | 1.29   | 2.04  | 0.76                    | 1.68   | 3.64  | 0.77               | 1.43   | 2.60  |
| Duloxetine      | 1.11           | 1.44   | 1.88  | 0.58               | 0.76   | 1.01  | 0.89                    | 1.17   | 1.54  | 0.79               | 1.05   | 1.41  |
| Escitalopram    | 1.44           | 1.85   | 2.39  | 0.86               | 1.19   | 1.64  | 0.82                    | 1.10   | 1.48  | 0.86               | 1.26   | 1.83  |
| Fluoxetine      | 1.47           | 1.60   | 1.74  | 1.22               | 1.38   | 1.57  | 0.78                    | 0.85   | 0.94  | 0.68               | 0.79   | 0.91  |
| Fluvoxamine     | 1.35           | 1.66   | 2.05  | 0.82               | 1.07   | 1.40  | 0.85                    | 1.06   | 1.33  | 0.78               | 1.10   | 1.54  |
| Levomilnacipran | 0.59           | 2.60   | 11.57 | 0.45               | 1.50   | 5.03  | 0.06                    | 0.33   | 1.71  | 0.09               | 0.35   | 1.33  |
| Milnacipran     | 1.43           | 1.82   | 2.33  | 0.82               | 1.08   | 1.43  | 0.69                    | 0.93   | 1.25  | 0.61               | 0.85   | 1.19  |
| Mirtazapine     | 1.64           | 1.93   | 2.27  | 0.85               | 1.17   | 1.61  | 0.85                    | 1.01   | 1.21  | 0.68               | 0.96   | 1.35  |
| Nefazodone      | 1.25           | 1.80   | 2.61  | 0.33               | 1.01   | 3.12  | 0.65                    | 0.98   | 1.48  | 0.23               | 0.75   | 2.42  |
| Paroxetine      | 1.66           | 1.80   | 1.95  | 0.95               | 1.06   | 1.18  | 0.85                    | 0.93   | 1.01  | 0.78               | 0.87   | 0.98  |
| Reboxetine      | 1.24           | 1.46   | 1.72  | 1.21               | 1.87   | 2.92  | 0.92                    | 1.11   | 1.33  | 0.28               | 0.46   | 0.77  |
| Sertraline      | 1.58           | 1.78   | 2.00  | 1.01               | 1.27   | 1.60  | 0.80                    | 0.91   | 1.04  | 0.55               | 0.72   | 0.93  |
| Trazodone       | 1.36           | 1.64   | 1.98  | 0.83               | 1.00   | 1.21  | 0.89                    | 1.10   | 1.37  | 0.69               | 0.85   | 1.05  |
| Venlafaxine     | 1.86           | 2.12   | 2.42  | 1.30               | 1.59   | 1.95  | 0.77                    | 0.89   | 1.03  | 0.51               | 0.64   | 0.81  |
| Vilazodone      | 0.31           | 1.13   | 4.11  | 0.26               | 0.69   | 1.86  | 0.20                    | 0.87   | 3.51  | 0.26               | 0.82   | 2.39  |
| Vortioxetine    | 0.72           | 1.56   | 3.30  | 0.53               | 0.96   | 1.72  | 0.30                    | 0.79   | 2.00  | 0.38               | 0.79   | 1.63  |

The ORs are estimated/extrapolated for a study published in 1999 (centralisation value). Then, for every ten years increase, the OR is multiplied by beta.

No coefficients were assumed exchangeable.

#### 7.6.5.4 Adjusted for sponsorship

|                 | Response       |        |       |                    |        |       | Dropouts for any reason |        |       |                    |        |       |
|-----------------|----------------|--------|-------|--------------------|--------|-------|-------------------------|--------|-------|--------------------|--------|-------|
|                 | OR drug vs PLA |        |       | beta of comparison |        |       | OR drug vs PLA          |        |       | beta of comparison |        |       |
|                 | 2.5%           | median | 97.5% | 2.5%               | median | 97.5% | 2.5%                    | median | 97.5% | 2.5%               | median | 97.5% |
| Agomelatine     | 1.44           | 1.78   | 2.19  | 0.60               | 0.85   | 1.18  | 0.62                    | 0.75   | 0.92  | 1.03               | 1.40   | 1.90  |
| Amitriptyline   | 1.97           | 2.32   | 2.72  | 0.47               | 0.73   | 1.14  | 0.79                    | 0.94   | 1.12  | 0.66               | 1.00   | 1.52  |
| Bupropion       | 1.20           | 1.61   | 2.16  | 0.65               | 0.97   | 1.46  | 0.74                    | 0.96   | 1.24  | 0.73               | 1.04   | 1.46  |
| Citalopram      | 1.23           | 1.48   | 1.79  | 0.79               | 1.04   | 1.38  | 0.67                    | 0.84   | 1.06  | 0.85               | 1.24   | 1.81  |
| Clomipramine    | 1.10           | 1.50   | 2.05  | 0.35               | 0.77   | 1.33  | 0.90                    | 1.35   | 1.98  | 0.47               | 0.96   | 2.17  |
| Desvenlafaxine  | 1.04           | 1.62   | 2.51  | 0.52               | 0.89   | 1.54  | 0.78                    | 1.20   | 2.01  | 0.43               | 0.86   | 1.46  |
| Duloxetine      | 1.52           | 1.81   | 2.16  | 0.81               | 1.04   | 1.35  | 1.06                    | 1.27   | 1.52  | 0.47               | 0.66   | 0.91  |
| Escitalopram    | 1.47           | 1.73   | 2.03  | 0.73               | 0.93   | 1.20  | 0.74                    | 0.87   | 1.03  | 0.80               | 1.06   | 1.42  |
| Fluoxetine      | 1.31           | 1.48   | 1.67  | 0.85               | 1.06   | 1.33  | 0.76                    | 0.87   | 1.00  | 0.81               | 1.02   | 1.29  |
| Fluvoxamine     | 1.23           | 1.56   | 1.96  | 0.99               | 1.49   | 2.27  | 0.84                    | 1.15   | 1.58  | 0.45               | 0.80   | 1.40  |
| Levomilnacipran | 1.10           | 1.98   | 4.25  | 0.35               | 0.79   | 1.42  | 0.84                    | 1.44   | 3.15  | 0.32               | 0.80   | 1.40  |
| Milnacipran     | 1.21           | 1.65   | 2.23  | 0.43               | 0.86   | 1.70  | 0.70                    | 0.96   | 1.32  | 0.54               | 1.07   | 2.10  |
| Mirtazapine     | 1.59           | 1.91   | 2.29  | 0.65               | 0.88   | 1.21  | 0.78                    | 0.94   | 1.14  | 0.87               | 1.17   | 1.56  |
| Nefazodone      | 1.05           | 1.56   | 2.30  | 0.66               | 1.14   | 2.00  | 0.62                    | 0.94   | 1.44  | 0.53               | 0.95   | 1.69  |
| Paroxetine      | 1.59           | 1.80   | 2.03  | 0.73               | 0.90   | 1.11  | 0.83                    | 0.94   | 1.06  | 0.85               | 1.03   | 1.26  |
| Reboxetine      | 0.94           | 1.30   | 1.76  | 0.68               | 0.99   | 1.52  | 0.84                    | 1.22   | 1.76  | 0.57               | 0.93   | 1.53  |
| Sertraline      | 1.44           | 1.69   | 1.97  | 0.71               | 0.96   | 1.31  | 0.74                    | 0.87   | 1.03  | 0.85               | 1.15   | 1.57  |
| Trazodone       | 1.17           | 1.48   | 1.87  | 0.69               | 1.26   | 2.34  | 0.90                    | 1.15   | 1.47  | 0.54               | 0.95   | 1.67  |
| Venlafaxine     | 1.52           | 1.75   | 2.02  | 0.84               | 1.08   | 1.40  | 0.91                    | 1.06   | 1.23  | 0.68               | 0.88   | 1.14  |
| Vilazodone      | 1.24           | 1.90   | 3.23  | 0.36               | 0.77   | 1.32  | 0.70                    | 1.33   | 3.41  | 0.32               | 0.86   | 1.60  |
| Vortioxetine    | 1.43           | 1.97   | 2.93  | 0.41               | 0.76   | 1.21  | 0.66                    | 0.97   | 1.34  | 0.71               | 1.10   | 1.95  |

The ORs are extrapolated for a study without sponsoring. When the study is sponsored then the OR is on average multiplied by beta. Hence, beta>1 means that sponsoring magnifies the efficacy of the active intervention. It was not possible to estimate effects for interventions that are sponsored in all included studies (or not sponsored in all included studies) such as vortioxetine.

#### 7.6.5.5 Adjusted for probability of receiving placebo

|  | Response       |  |  |                    |  |  | Dropouts for any reason |  |  |                    |  |  |
|--|----------------|--|--|--------------------|--|--|-------------------------|--|--|--------------------|--|--|
|  | OR drug vs PLA |  |  | beta of comparison |  |  | OR drug vs PLA          |  |  | beta of comparison |  |  |



|                 | 2.5% median 97.5% |        |       |      |        |       | 2.5% median 97.5% |        |       |      |        |       |
|-----------------|-------------------|--------|-------|------|--------|-------|-------------------|--------|-------|------|--------|-------|
|                 | 2.5%              | median | 97.5% | 2.5% | median | 97.5% | 2.5%              | median | 97.5% | 2.5% | median | 97.5% |
| Agomelatine     | 1.25              | 1.57   | 1.98  | 0.47 | 1.04   | 2.28  | 0.67              | 0.87   | 1.14  | 0.39 | 0.93   | 2.22  |
| Amitriptyline   | 2.40              | 3.16   | 4.17  | 1.75 | 4.02   | 9.37  | 0.48              | 0.66   | 0.89  | 0.11 | 0.29   | 0.72  |
| Bupropion       | 1.23              | 1.60   | 2.08  | 0.44 | 1.29   | 3.70  | 0.65              | 0.86   | 1.14  | 0.17 | 0.50   | 1.45  |
| Citalopram      | 1.02              | 1.42   | 1.97  | 0.38 | 0.99   | 2.67  | 0.77              | 1.15   | 1.69  | 0.48 | 1.52   | 4.57  |
| Clomipramine    | 0.97              | 1.28   | 1.69  | -    | -      | -     | 0.01              | 0.19   | 1.79  | -    | -      | -     |
| Desvenlafaxine  | 1.10              | 1.58   | 2.30  | 0.19 | 1.54   | 12.96 | 0.50              | 0.75   | 1.13  | 0.01 | 0.09   | 0.92  |
| Duloxetine      | 1.69              | 2.09   | 2.59  | 0.82 | 1.80   | 4.02  | 0.74              | 0.94   | 1.19  | 0.21 | 0.49   | 1.16  |
| Escitalopram    | 1.13              | 1.39   | 1.72  | 0.31 | 0.63   | 1.35  | 0.86              | 1.09   | 1.37  | 0.74 | 1.62   | 3.63  |
| Fluoxetine      | 1.45              | 1.73   | 2.06  | 0.97 | 1.85   | 3.57  | 0.66              | 0.80   | 0.96  | 0.31 | 0.62   | 1.19  |
| Fluvoxamine     | 1.61              | 2.60   | 4.10  | 1.16 | 4.00   | 13.17 | 0.53              | 0.90   | 1.56  | 0.13 | 0.51   | 1.90  |
| Levomilnacipran | 1.19              | 1.63   | 2.24  | 0.13 | 1.29   | 12.97 | 0.75              | 1.05   | 1.46  | 0.02 | 0.26   | 2.72  |
| Milnacipran     | 1.06              | 1.42   | 1.91  | -    | -      | -     | 0.00              | 0.08   | 2.68  | -    | -      | -     |
| Mirtazapine     | 1.40              | 1.96   | 2.72  | 0.55 | 1.41   | 3.57  | 0.63              | 0.88   | 1.24  | 0.23 | 0.61   | 1.60  |
| Nefazodone      | 1.29              | 2.07   | 3.31  | 0.58 | 2.49   | 10.70 | 0.45              | 0.72   | 1.17  | 0.08 | 0.36   | 1.71  |
| Paroxetine      | 1.47              | 1.76   | 2.13  | 0.69 | 1.34   | 2.68  | 0.77              | 0.92   | 1.11  | 0.36 | 0.73   | 1.43  |
| Reboxetine      | 1.25              | 1.69   | 2.30  | 0.92 | 2.69   | 8.12  | 0.66              | 0.91   | 1.25  | 0.10 | 0.32   | 1.07  |
| Sertraline      | 1.30              | 1.65   | 2.08  | 0.59 | 1.27   | 2.63  | 0.89              | 1.14   | 1.46  | 0.64 | 1.41   | 3.10  |
| Trazodone       | 1.41              | 1.97   | 2.76  | 1.17 | 3.13   | 8.54  | 0.84              | 1.19   | 1.69  | 0.31 | 0.90   | 2.60  |
| Venlafaxine     | 1.66              | 2.10   | 2.66  | 0.91 | 1.92   | 4.06  | 0.66              | 0.85   | 1.08  | 0.21 | 0.48   | 1.01  |
| Vilazodone      | 1.34              | 1.85   | 2.55  | 0.55 | 3.30   | 19.91 | 0.72              | 1.01   | 1.41  | 0.04 | 0.29   | 2.18  |
| Vortioxetine    | 0.91              | 1.26   | 1.76  | 0.08 | 0.30   | 1.22  | 0.74              | 1.06   | 1.54  | 0.26 | 1.13   | 5.31  |

The ORs estimated are for a study with 0% probability of receiving placebo (head-to-head studies). Then, the ORs are multiplied by beta for every 20% increase in the probability;  $\beta_{[1,j]} < 1$  means that the higher the probability of receiving placebo, the smaller the effectiveness of the intervention.

Betas were not estimable for clomipramine and milnacipran because they feature only in head-to-head studies (so the covariate is always 0%).

#### 7.6.5.6 Multicenter trials

|                | Response       |        |       |                    |        |       | Dropouts for any reason |        |       |                    |        |       |
|----------------|----------------|--------|-------|--------------------|--------|-------|-------------------------|--------|-------|--------------------|--------|-------|
|                | OR drug vs PLA |        |       | beta of comparison |        |       | OR drug vs PLA          |        |       | beta of comparison |        |       |
|                | 2.5%           | median | 97.5% | 2.5%               | median | 97.5% | 2.5%                    | median | 97.5% | 2.5%               | median | 97.5% |
| Agomelatine    | 1.42           | 1.61   | 1.84  | -                  | -      | -     | 0.75                    | 0.86   | 0.99  | -                  | -      | -     |
| Amitriptyline  | 1.67           | 1.92   | 2.21  | 1.24               | 1.74   | 2.44  | 0.90                    | 1.05   | 1.22  | 0.44               | 0.63   | 0.88  |
| Bupropion      | 1.29           | 1.51   | 1.77  | 0.16               | 0.91   | 6.49  | 0.84                    | 0.99   | 1.17  | -                  | -      | -     |
| Citalopram     | 1.27           | 1.45   | 1.66  | 1.10               | 3.18   | 9.50  | 0.84                    | 0.98   | 1.14  | 0.03               | 0.19   | 0.95  |
| Clomipramine   | 1.15           | 1.43   | 1.77  | 0.41               | 1.63   | 8.92  | 1.09                    | 1.41   | 1.82  | -                  | -      | -     |
| Desvenlafaxine | 1.24           | 1.49   | 1.78  | -                  | -      | -     | 0.88                    | 1.08   | 1.32  | -                  | -      | -     |

|                 |      |      |      |      |      |       |      |      |      |      |      |      |
|-----------------|------|------|------|------|------|-------|------|------|------|------|------|------|
| Duloxetine      | 1.64 | 1.83 | 2.04 | -    | -    | -     | 0.98 | 1.10 | 1.24 | -    | -    | -    |
| Escitalopram    | 1.47 | 1.64 | 1.82 | 0.93 | 3.50 | 13.41 | 0.82 | 0.92 | 1.04 | 0.01 | 0.13 | 1.00 |
| Fluoxetine      | 1.33 | 1.45 | 1.58 | 1.28 | 1.84 | 2.64  | 0.84 | 0.93 | 1.02 | 0.40 | 0.58 | 0.84 |
| Fluvoxamine     | 1.28 | 1.55 | 1.87 | 0.83 | 1.37 | 2.29  | 0.95 | 1.16 | 1.42 | 0.55 | 0.94 | 1.60 |
| Levomilnacipran | 1.25 | 1.59 | 2.03 | -    | -    | -     | 0.94 | 1.19 | 1.52 | -    | -    | -    |
| Milnacipran     | 1.28 | 1.64 | 2.09 | -    | -    | -     | 0.77 | 1.01 | 1.32 | -    | -    | -    |
| Mirtazapine     | 1.48 | 1.75 | 2.07 | 0.98 | 1.62 | 2.72  | 0.91 | 1.09 | 1.30 | 0.35 | 0.61 | 1.04 |
| Nefazodone      | 1.24 | 1.62 | 2.10 | 0.65 | 1.15 | 2.05  | 0.70 | 0.93 | 1.23 | 0.55 | 1.01 | 1.82 |
| Paroxetine      | 1.53 | 1.67 | 1.81 | 1.14 | 1.51 | 2.00  | 0.92 | 1.00 | 1.09 | 0.53 | 0.69 | 0.90 |
| Reboxetine      | 1.14 | 1.34 | 1.59 | -    | -    | -     | 0.99 | 1.19 | 1.42 | -    | -    | -    |
| Sertraline      | 1.43 | 1.60 | 1.81 | 0.54 | 1.06 | 2.09  | 0.88 | 1.00 | 1.13 | 0.88 | 2.32 | 6.53 |
| Trazodone       | 1.13 | 1.39 | 1.72 | 1.14 | 2.17 | 4.12  | 0.96 | 1.21 | 1.53 | 0.36 | 0.73 | 1.46 |
| Venlafaxine     | 1.61 | 1.78 | 1.97 | 0.24 | 0.49 | 0.99  | 0.94 | 1.05 | 1.17 | 0.74 | 1.56 | 3.27 |
| Vilazodone      | 1.28 | 1.59 | 1.98 | -    | -    | -     | 0.90 | 1.15 | 1.47 | -    | -    | -    |
| Vortioxetine    | 1.45 | 1.66 | 1.90 | -    | -    | -     | 0.87 | 1.02 | 1.19 | -    | -    | -    |

The ORs estimated are estimated from studies in multi-center trials. Then, the ORs are multiplied by beta for single center trials

#### 7.6.5.7 Adjusted for baseline severity (continuous)

|                 | Response       |        |       |                    |        |       | Dropouts for any reason |        |       |                    |        |       |
|-----------------|----------------|--------|-------|--------------------|--------|-------|-------------------------|--------|-------|--------------------|--------|-------|
|                 | OR drug vs PLA |        |       | beta of comparison |        |       | OR drug vs PLA          |        |       | beta of comparison |        |       |
|                 | 2.5%           | median | 97.5% | 2.5%               | median | 97.5% | 2.5%                    | median | 97.5% | 2.5%               | median | 97.5% |
| Agomelatine     | 1.33           | 1.57   | 1.84  | 0.76               | 1.36   | 2.43  | 0.75                    | 0.89   | 1.06  | 0.39               | 0.71   | 1.30  |
| Amitriptyline   | 1.77           | 2.03   | 2.32  | 1.09               | 1.58   | 2.31  | 0.83                    | 0.96   | 1.11  | 0.38               | 0.63   | 1.05  |
| Bupropion       | 1.27           | 1.51   | 1.81  | 1.12               | 2.17   | 4.22  | 0.76                    | 0.94   | 1.15  | 0.34               | 0.99   | 2.90  |
| Citalopram      | 1.33           | 1.60   | 1.92  | 0.84               | 1.28   | 1.93  | 0.77                    | 0.95   | 1.16  | 0.54               | 0.86   | 1.36  |
| Clomipramine    | 1.19           | 1.49   | 1.87  | 0.59               | 0.98   | 1.65  | 0.98                    | 1.27   | 1.65  | 0.47               | 0.80   | 1.37  |
| Desvenlafaxine  | 0.92           | 1.44   | 2.27  | 0.04               | 0.79   | 16.78 | 1.17                    | 1.99   | 3.40  | -                  | -      | -     |
| Duloxetine      | 1.54           | 1.80   | 2.10  | 0.64               | 0.94   | 1.36  | 1.09                    | 1.29   | 1.53  | 1.07               | 1.59   | 2.35  |
| Escitalopram    | 1.42           | 1.62   | 1.85  | 0.64               | 0.88   | 1.22  | 0.81                    | 0.93   | 1.07  | 0.77               | 1.10   | 1.58  |
| Fluoxetine      | 1.38           | 1.50   | 1.64  | 0.95               | 1.27   | 1.68  | 0.81                    | 0.89   | 0.97  | 0.54               | 0.72   | 0.96  |
| Fluvoxamine     | 1.36           | 1.63   | 1.96  | 1.24               | 2.58   | 5.38  | 0.94                    | 1.14   | 1.39  | 0.25               | 0.55   | 1.24  |
| Levomilnacipran | 1.22           | 1.60   | 2.10  | 0.40               | 1.03   | 2.64  | 0.90                    | 1.19   | 1.56  | 0.24               | 0.63   | 1.66  |
| Milnacipran     | 1.38           | 1.77   | 2.28  | 0.46               | 1.57   | 5.39  | 0.73                    | 0.96   | 1.26  | 0.16               | 0.59   | 2.14  |
| Mirtazapine     | 1.58           | 1.85   | 2.16  | 0.97               | 1.72   | 3.06  | 0.86                    | 1.01   | 1.19  | 0.28               | 0.51   | 0.94  |
| Nefazodone      | 1.31           | 1.67   | 2.11  | 0.42               | 2.54   | 15.56 | 0.73                    | 0.94   | 1.20  | 0.06               | 0.35   | 2.10  |
| Paroxetine      | 1.60           | 1.74   | 1.89  | 0.78               | 1.01   | 1.30  | 0.89                    | 0.97   | 1.05  | 0.63               | 0.82   | 1.07  |
| Reboxetine      | 0.76           | 1.08   | 1.51  | 0.89               | 3.29   | 12.33 | 1.30                    | 1.87   | 2.67  | 0.02               | 0.10   | 0.44  |
| Sertraline      | 1.46           | 1.66   | 1.89  | 0.83               | 1.22   | 1.78  | 0.78                    | 0.90   | 1.03  | 0.33               | 0.51   | 0.80  |
| Trazodone       | 1.31           | 1.61   | 1.97  | 0.40               | 0.88   | 1.97  | 0.95                    | 1.18   | 1.47  | 0.21               | 0.49   | 1.14  |

|              |      |      |      |      |      |      |      |      |      |      |      |      |
|--------------|------|------|------|------|------|------|------|------|------|------|------|------|
| Venlafaxine  | 1.57 | 1.74 | 1.92 | 0.98 | 1.35 | 1.86 | 0.93 | 1.03 | 1.15 | 0.51 | 0.72 | 1.00 |
| Vilazodone   | 1.04 | 1.40 | 1.89 | 0.28 | 0.62 | 1.32 | 0.81 | 1.13 | 1.58 | 0.42 | 0.92 | 2.04 |
| Vortioxetine | 1.39 | 1.65 | 1.96 | 0.71 | 1.03 | 1.50 | 0.83 | 1.01 | 1.22 | 0.58 | 0.87 | 1.31 |

The ORs are estimated/extrapolated for a study with average baseline severity of 24.5 on HAM-D17 (centralisation value). Then, for 10 units of increase, the OR is multiplied by beta. However, we observed that the association might not be linear and hence we performed a subgroup analysis of studies with average score of 24 or below (moderate to low severity) versus studies with average severity above 24 (severe).

No coefficients were assumed exchangeable.

#### 7.6.5.8 Adjusted for baseline severity (dichotomised)

|                 | Response |        |       |      |        |       | Dropouts for any reason |        |       |      |        |       |
|-----------------|----------|--------|-------|------|--------|-------|-------------------------|--------|-------|------|--------|-------|
|                 | <=24     |        |       | >24  |        |       | <=24                    |        |       | >24  |        |       |
|                 | 2.5%     | median | 97.5% | 2.5% | median | 97.5% | 2.5%                    | median | 97.5% | 2.5% | median | 97.5% |
| Agomelatine     | -        | -      | -     | 1.46 | 1.70   | 1.98  | -                       | -      | -     | 0.70 | 0.83   | 0.97  |
| Amitriptyline   | 1.52     | 1.93   | 2.45  | 1.89 | 2.20   | 2.57  | 0.79                    | 1.02   | 1.31  | 0.74 | 0.87   | 1.03  |
| Bupropion       | 0.89     | 1.27   | 1.80  | 1.36 | 1.69   | 2.11  | 0.63                    | 0.99   | 1.54  | 0.74 | 0.91   | 1.12  |
| Citalopram      | 1.20     | 1.43   | 1.70  | 1.30 | 1.71   | 2.24  | 0.76                    | 0.95   | 1.18  | 0.70 | 0.92   | 1.20  |
| Clomipramine    | 1.13     | 1.57   | 2.20  | 0.90 | 1.27   | 1.79  | 0.88                    | 1.30   | 1.94  | 0.84 | 1.23   | 1.80  |
| Desvenlafaxine  | 1.17     | 1.45   | 1.81  | 0.97 | 1.80   | 3.34  | 0.81                    | 1.04   | 1.33  | 0.70 | 1.50   | 3.37  |
| Duloxetine      | 1.54     | 1.78   | 2.05  | 1.49 | 1.94   | 2.52  | 0.85                    | 1.00   | 1.17  | 1.07 | 1.40   | 1.83  |
| Escitalopram    | 1.46     | 1.73   | 2.04  | 1.35 | 1.60   | 1.91  | 0.68                    | 0.83   | 1.01  | 0.79 | 0.95   | 1.13  |
| Fluoxetine      | 1.15     | 1.36   | 1.61  | 1.40 | 1.55   | 1.73  | 0.76                    | 0.92   | 1.11  | 0.76 | 0.85   | 0.94  |
| Fluvoxamine     | 0.96     | 1.32   | 1.82  | 1.52 | 1.92   | 2.42  | 0.75                    | 1.12   | 1.69  | 0.85 | 1.06   | 1.33  |
| Levomilnacipran | 1.07     | 1.66   | 2.60  | 1.09 | 1.54   | 2.19  | 0.84                    | 1.36   | 2.20  | 0.84 | 1.17   | 1.64  |
| Milnacipran     | 1.06     | 1.62   | 2.46  | 1.36 | 1.91   | 2.71  | 0.56                    | 0.94   | 1.56  | 0.64 | 0.91   | 1.31  |
| Mirtazapine     | 1.27     | 1.70   | 2.26  | 1.62 | 1.97   | 2.40  | 0.89                    | 1.22   | 1.68  | 0.70 | 0.85   | 1.03  |
| Nefazodone      | 1.05     | 1.52   | 2.20  | 1.25 | 1.75   | 2.46  | 0.66                    | 0.98   | 1.46  | 0.64 | 0.90   | 1.27  |
| Paroxetine      | 1.45     | 1.65   | 1.89  | 1.58 | 1.78   | 2.01  | 0.83                    | 0.96   | 1.11  | 0.81 | 0.91   | 1.02  |
| Reboxetine      | -        | -      | -     | 1.17 | 1.41   | 1.70  | -                       | -      | -     | 0.94 | 1.14   | 1.37  |
| Sertraline      | 1.23     | 1.47   | 1.75  | 1.49 | 1.81   | 2.20  | 0.88                    | 1.07   | 1.30  | 0.65 | 0.80   | 0.98  |
| Trazodone       | 1.27     | 1.78   | 2.49  | 1.07 | 1.41   | 1.85  | 0.85                    | 1.24   | 1.81  | 0.79 | 1.05   | 1.39  |
| Venlafaxine     | 1.25     | 1.51   | 1.82  | 1.57 | 1.79   | 2.04  | 0.78                    | 0.97   | 1.20  | 0.87 | 1.00   | 1.14  |
| Vilazodone      | 1.15     | 1.55   | 2.11  | 1.04 | 1.61   | 2.50  | 0.83                    | 1.21   | 1.75  | 0.68 | 1.04   | 1.59  |
| Vortioxetine    | 1.31     | 1.61   | 1.97  | 1.34 | 1.72   | 2.20  | 0.84                    | 1.06   | 1.35  | 0.76 | 0.99   | 1.28  |

The percentage change for this variable is between subgroups and shows the % decrease in the ORs for response or dropout between moderate/severe depression vs severe depression (=OR<sub>low/moderate</sub>/OR<sub>severe</sub> - 1).

### 7.6.5.9 Adjusted for dosing schedule

|                 | Response   |        |       |               |        |       | Dropouts for any reason |        |       |               |        |       |
|-----------------|------------|--------|-------|---------------|--------|-------|-------------------------|--------|-------|---------------|--------|-------|
|                 | Fixed dose |        |       | Flexible dose |        |       | Fixed dose              |        |       | Flexible dose |        |       |
|                 | 2.5%       | median | 97.5% | 2.5%          | median | 97.5% | 2.5%                    | median | 97.5% | 2.5%          | median | 97.5% |
| Agomelatine     | 1.13       | 1.38   | 1.67  | 0.99          | 1.31   | 1.74  | 0.82                    | 1.01   | 1.25  | 0.51          | 0.69   | 0.94  |
| Amitriptyline   | 1.29       | 1.85   | 2.69  | 0.83          | 1.24   | 1.82  | 0.82                    | 1.16   | 1.68  | 0.51          | 0.77   | 1.12  |
| Bupropion       | 1.07       | 1.40   | 1.83  | 0.87          | 1.21   | 1.68  | 0.71                    | 0.96   | 1.29  | 0.71          | 1.02   | 1.46  |
| Citalopram      | 1.19       | 1.42   | 1.69  | 0.84          | 1.11   | 1.46  | 0.87                    | 1.06   | 1.29  | 0.55          | 0.77   | 1.07  |
| Clomipramine    | 1.06       | 1.58   | 2.35  | 0.61          | 0.99   | 1.63  | 0.79                    | 1.20   | 1.84  | 0.66          | 1.15   | 1.98  |
| Desvenlafaxine  | 1.24       | 1.49   | 1.79  | -             | -      | -     | 0.88                    | 1.08   | 1.33  | -             | -      | -     |
| Duloxetine      | 1.63       | 1.85   | 2.11  | 0.44          | 0.92   | 1.92  | 0.96                    | 1.10   | 1.26  | 0.39          | 0.82   | 1.71  |
| Escitalopram    | 1.54       | 1.82   | 2.13  | 0.67          | 0.84   | 1.06  | 0.66                    | 0.79   | 0.95  | 1.05          | 1.36   | 1.74  |
| Fluoxetine      | 1.20       | 1.38   | 1.60  | 0.96          | 1.15   | 1.38  | 0.84                    | 0.99   | 1.17  | 0.67          | 0.82   | 1.00  |
| Fluvoxamine     | 0.75       | 1.13   | 1.73  | 1.03          | 1.64   | 2.59  | 0.94                    | 1.34   | 1.93  | 0.48          | 0.74   | 1.13  |
| Levomilnacipran | 1.05       | 1.56   | 2.33  | 0.62          | 1.04   | 1.73  | 1.02                    | 1.53   | 2.28  | 0.40          | 0.67   | 1.11  |
| Milnacipran     | 1.06       | 1.46   | 2.03  | 0.59          | 1.42   | 3.47  | 0.73                    | 1.03   | 1.46  | 0.45          | 1.53   | 5.33  |
| Mirtazapine     | 1.35       | 1.78   | 2.35  | 0.81          | 1.12   | 1.56  | 0.88                    | 1.16   | 1.54  | 0.55          | 0.77   | 1.07  |
| Nefazodone      | 0.38       | 1.01   | 2.58  | 0.66          | 1.75   | 4.72  | 0.51                    | 1.36   | 3.51  | 0.24          | 0.65   | 1.79  |
| Paroxetine      | 1.40       | 1.59   | 1.81  | 0.97          | 1.15   | 1.37  | 0.88                    | 1.00   | 1.14  | 0.76          | 0.91   | 1.08  |
| Reboxetine      | 1.35       | 2.09   | 3.27  | 0.39          | 0.63   | 1.01  | 0.45                    | 0.74   | 1.23  | 0.93          | 1.60   | 2.77  |
| Sertraline      | 0.86       | 1.27   | 1.91  | 0.90          | 1.37   | 2.07  | 0.87                    | 1.26   | 1.83  | 0.48          | 0.72   | 1.07  |
| Trazodone       | 0.62       | 1.34   | 2.82  | 0.54          | 1.16   | 2.56  | 0.62                    | 1.35   | 3.13  | 0.35          | 0.83   | 1.87  |
| Venlafaxine     | 1.47       | 1.74   | 2.06  | 0.85          | 1.04   | 1.29  | 0.89                    | 1.06   | 1.27  | 0.75          | 0.94   | 1.19  |
| Vilazodone      | 1.26       | 1.58   | 1.98  | -             | -      | -     | 0.90                    | 1.16   | 1.50  | -             | -      | -     |
| Vortioxetine    | 1.44       | 1.67   | 1.94  | -             | -      | -     | 0.87                    | 1.02   | 1.21  | -             | -      | -     |

The percentage change for this variable is between subgroups and shows the % decrease in the ORs for response or dropout between fixed vs flexible dose ( $=OR_{fixed}/OR_{flexible} - 1$ ).

### 7.6.6 Summary of the findings from meta-regressions and subgroup analyses

The effect of amitriptyline (response and dropout) was moderated by all but one variable. The other drugs had variable associations, depending on outcome and analysis.

**Variables that impact on the relative response and dropout of interventions over placebo.** The use of placebo in trials is the strongest explanation of heterogeneity among those evaluated (section 7.6.2). Smaller studies and older studies presented larger effects of the active interventions versus placebo (in particular for amitriptyline, bupropion, fluoxetine and reboxetine) (see sections 7.6.2, 7.6.5). These three variables were considered the most important effect modifiers to consider further.

**Variables with questionable impact on the effectiveness of interventions over placebo.** Multi-center trials tended to show smaller relative responses and larger dropout rates for active versus placebo. However, the relative change in the odds ratios between multi-center studies and all data was very small and the drop in heterogeneity negligible. Studies with patients with more severe depression showed larger effectiveness and less dropout than studies with moderate/low depression for most drugs and for most active interventions. The impact of baseline severity appears to be important for the effectiveness of fluvoxamine and the dropout rates of desvenlafaxine, reboxetine and sertraline. However the heterogeneity remains unchanged once accounting for differences in baseline severity and given the risk of ecological bias we did not consider this evidence conclusive. Analysis of studies with fixed dosing schedule showed smaller relative response and larger dropout rates compared to flexible dose. However, none of these differences was significant and the change in heterogeneity was negligible.

**Variables that do not impact on the effectiveness of interventions over placebo.** Excluding studies for which we had no access to unpublished data or for which we had imputed the response did not impact on the estimates or the heterogeneity. Likewise, including all studies with accepted dose range did not have any material impact on the estimates or the heterogeneity. We could not detect any important impact of sponsorship. Accounting for novel agent effects (wish bias) yields a statistically significant coefficient indicating that the effectiveness of an intervention is magnified by on average 10% (OR 1.1) when it is the experimental intervention in a comparison rather than the reference. However, the novel/experimental-agent adjusted ORs and the heterogeneity were not materially different to those from the unadjusted model. Note that this model is the only one that uses exchangeable coefficients for all interventions and hence the power to estimate the impact of this variable is very large.

## 8 Analyses of the head-to-head trials network

### 8.1 Results from network meta-analyses

The results below show the relative efficacy and acceptability of all drugs versus reboxetine.

#### 8.1.1 Response

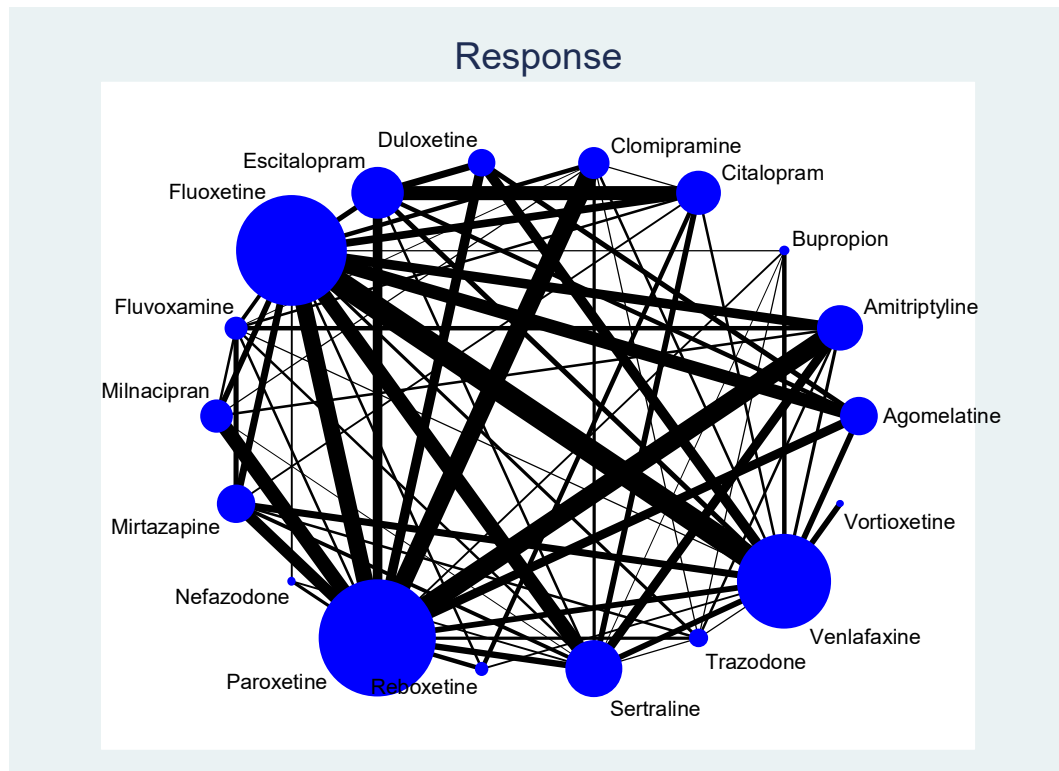

## Response

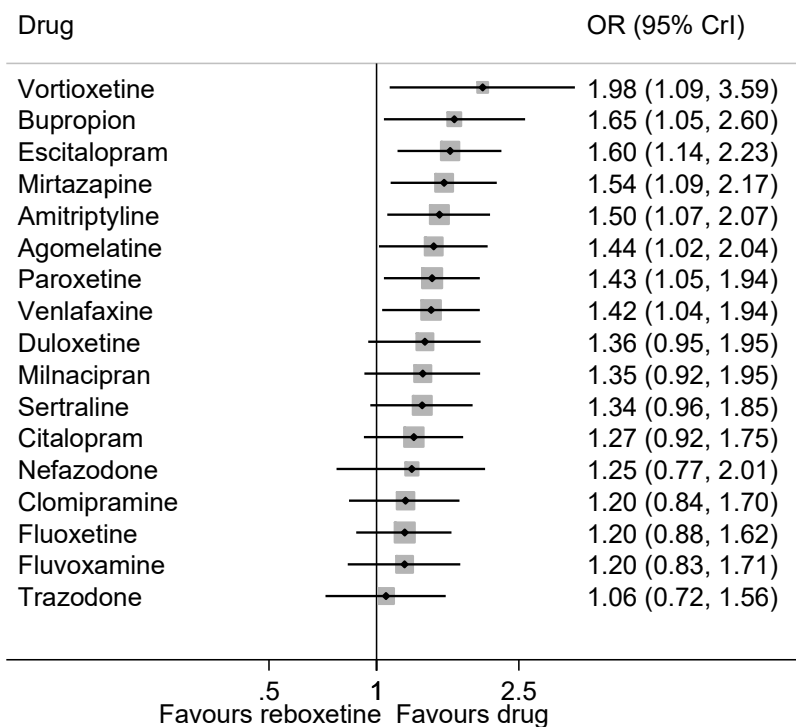

|                     |                     |                     |                     |                     |                     |                     |                     |                     |                     |                     |                     |      |  |  |  |  |  |  |  |
|---------------------|---------------------|---------------------|---------------------|---------------------|---------------------|---------------------|---------------------|---------------------|---------------------|---------------------|---------------------|------|--|--|--|--|--|--|--|
| Agom                |                     |                     |                     |                     |                     |                     |                     |                     |                     |                     |                     |      |  |  |  |  |  |  |  |
| 0.96<br>(0.76,1.24) | Amit                |                     |                     |                     |                     |                     |                     |                     |                     |                     |                     |      |  |  |  |  |  |  |  |
| 0.87<br>(0.59,1.30) | 0.91<br>(0.62,1.31) | Bupr                |                     |                     |                     |                     |                     |                     |                     |                     |                     |      |  |  |  |  |  |  |  |
| 1.13<br>(0.88,1.47) | 1.18<br>(0.93,1.49) | 1.30<br>(0.88,1.93) | Cita                |                     |                     |                     |                     |                     |                     |                     |                     |      |  |  |  |  |  |  |  |
| 1.20<br>(0.91,1.59) | 1.24<br>(0.98,1.58) | 1.37<br>(0.93,2.04) | 1.06<br>(0.82,1.38) | Clom                |                     |                     |                     |                     |                     |                     |                     |      |  |  |  |  |  |  |  |
| 1.06<br>(0.82,1.37) | 1.10<br>(0.84,1.42) | 1.21<br>(0.81,1.81) | 0.93<br>(0.71,1.22) | 0.88<br>(0.66,1.18) | Dulo                |                     |                     |                     |                     |                     |                     |      |  |  |  |  |  |  |  |
| 0.90<br>(0.71,1.14) | 0.93<br>(0.74,1.17) | 1.03<br>(0.70,1.51) | 0.79<br>(0.65,0.97) | 0.75<br>(0.58,0.97) | 0.85<br>(0.67,1.08) | Esci                |                     |                     |                     |                     |                     |      |  |  |  |  |  |  |  |
| 1.20<br>(0.99,1.48) | 1.25<br>(1.06,1.48) | 1.38<br>(0.97,1.97) | 1.06<br>(0.87,1.29) | 1.00<br>(0.81,1.24) | 1.14<br>(0.91,1.44) | 1.34<br>(1.11,1.61) | Fluo                |                     |                     |                     |                     |      |  |  |  |  |  |  |  |
| 1.20<br>(0.91,1.61) | 1.25<br>(0.99,1.59) | 1.38<br>(0.93,2.07) | 1.06<br>(0.82,1.39) | 1.01<br>(0.76,1.32) | 1.14<br>(0.85,1.54) | 1.34<br>(1.03,1.75) | 1.00<br>(0.80,1.25) | Fluvo               |                     |                     |                     |      |  |  |  |  |  |  |  |
| 1.07<br>(0.80,1.44) | 1.11<br>(0.86,1.43) | 1.23<br>(0.81,1.85) | 0.94<br>(0.71,1.26) | 0.89<br>(0.67,1.19) | 1.01<br>(0.74,1.38) | 1.19<br>(0.90,1.58) | 0.89<br>(0.70,1.13) | 0.89<br>(0.67,1.17) | Miln                |                     |                     |      |  |  |  |  |  |  |  |
| 0.93<br>(0.72,1.21) | 0.97<br>(0.77,1.21) | 1.07<br>(0.73,1.57) | 0.82<br>(0.65,1.05) | 0.78<br>(0.60,1.01) | 0.88<br>(0.67,1.16) | 1.04<br>(0.82,1.32) | 0.78<br>(0.64,0.94) | 0.78<br>(0.60,0.99) | 0.87<br>(0.66,1.15) | Mirt                |                     |      |  |  |  |  |  |  |  |
| 1.15<br>(0.76,1.76) | 1.19<br>(0.80,1.78) | 1.32<br>(0.80,2.20) | 1.01<br>(0.67,1.54) | 0.96<br>(0.63,1.45) | 1.09<br>(0.71,1.68) | 1.28<br>(0.86,1.94) | 0.96<br>(0.66,1.40) | 0.95<br>(0.63,1.46) | 1.07<br>(0.70,1.67) | 1.23<br>(0.82,1.86) | Nefa                |      |  |  |  |  |  |  |  |
| 1.01<br>(0.82,1.24) | 1.05<br>(0.89,1.23) | 1.16<br>(0.81,1.64) | 0.89<br>(0.72,1.09) | 0.84<br>(0.68,1.03) | 0.95<br>(0.76,1.19) | 1.12<br>(0.93,1.35) | 0.84<br>(0.73,0.95) | 0.84<br>(0.67,1.04) | 0.94<br>(0.75,1.18) | 1.08<br>(0.89,1.30) | 0.88<br>(0.60,1.27) | Paro |  |  |  |  |  |  |  |

|                         |                         |                         |                         |                         |                         |                         |                         |                         |                         |                         |                         |                         |                         |                         |                         |                         |      |
|-------------------------|-------------------------|-------------------------|-------------------------|-------------------------|-------------------------|-------------------------|-------------------------|-------------------------|-------------------------|-------------------------|-------------------------|-------------------------|-------------------------|-------------------------|-------------------------|-------------------------|------|
| 1.44<br>(1.02,2.0<br>4) | 1.50<br>(1.07,2.0<br>7) | 1.65<br>(1.05,2.6<br>0) | 1.27<br>(0.92,1.7<br>5) | 1.20<br>(0.84,1.7<br>0) | 1.36<br>(0.95,1.9<br>5) | 1.60<br>(1.14,2.2<br>3) | 1.20<br>(0.88,1.6<br>2) | 1.20<br>(0.83,1.7<br>1) | 1.35<br>(0.92,1.9<br>5) | 1.54<br>(1.09,2.1<br>7) | 1.25<br>(0.77,2.0<br>1) | 1.43<br>(1.05,1.9<br>4) | Rebo                    |                         |                         |                         |      |
| 1.07<br>(0.85,1.3<br>7) | 1.11<br>(0.92,1.3<br>5) | 1.23<br>(0.85,1.7<br>9) | 0.95<br>(0.76,1.1<br>8) | 0.90<br>(0.71,1.1<br>3) | 1.02<br>(0.79,1.3<br>2) | 1.20<br>(0.97,1.4<br>8) | 0.89<br>(0.76,1.0<br>5) | 0.89<br>(0.70,1.1<br>3) | 1.00<br>(0.77,1.3<br>0) | 1.15<br>(0.93,1.4<br>3) | 0.93<br>(0.63,1.3<br>7) | 1.07<br>(0.90,1.2<br>6) | 0.75<br>(0.54,1.0<br>4) | Sert                    |                         |                         |      |
| 1.36<br>(0.99,1.8<br>7) | 1.41<br>(1.06,1.8<br>6) | 1.56<br>(1.04,2.3<br>1) | 1.20<br>(0.88,1.6<br>3) | 1.13<br>(0.83,1.5<br>4) | 1.28<br>(0.92,1.7<br>9) | 1.51<br>(1.12,2.0<br>4) | 1.13<br>(0.87,1.4<br>6) | 1.13<br>(0.82,1.5<br>5) | 1.27<br>(0.91,1.7<br>6) | 1.45<br>(1.09,1.9<br>4) | 1.18<br>(0.75,1.8<br>4) | 1.35<br>(1.04,1.7<br>5) | 0.94<br>(0.64,1.3<br>9) | 1.26<br>(0.95,1.6<br>7) | Traz                    |                         |      |
| 1.01<br>(0.82,1.2<br>6) | 1.05<br>(0.87,1.2<br>7) | 1.16<br>(0.82,1.6<br>5) | 0.90<br>(0.72,1.1<br>0) | 0.85<br>(0.67,1.0<br>6) | 0.96<br>(0.77,1.2<br>1) | 1.13<br>(0.93,1.3<br>7) | 0.84<br>(0.73,0.9<br>7) | 0.84<br>(0.66,1.0<br>7) | 0.95<br>(0.73,1.2<br>3) | 1.09<br>(0.89,1.3<br>3) | 0.88<br>(0.59,1.3<br>0) | 1.01<br>(0.86,1.1<br>7) | 0.70<br>(0.51,0.9<br>7) | 0.94<br>(0.78,1.1<br>3) | 0.75<br>(0.57,0.9<br>8) | Veni                    |      |
| 0.73<br>(0.42,1.2<br>6) | 0.76<br>(0.44,1.2<br>9) | 0.83<br>(0.45,1.5<br>4) | 0.64<br>(0.37,1.1<br>1) | 0.61<br>(0.35,1.0<br>5) | 0.69<br>(0.40,1.2<br>0) | 0.81<br>(0.47,1.3<br>9) | 0.60<br>(0.36,1.0<br>2) | 0.60<br>(0.34,1.0<br>5) | 0.68<br>(0.39,1.2<br>0) | 0.78<br>(0.45,1.3<br>4) | 0.63<br>(0.33,1.1<br>9) | 0.72<br>(0.43,1.2<br>2) | 0.51<br>(0.28,0.9<br>2) | 0.68<br>(0.39,1.1<br>6) | 0.54<br>(0.30,0.9<br>5) | 0.72<br>(0.43,1.1<br>9) | Vort |

OR>1 favour the treatment in the column

### 8.1.2 Dropouts for any reason

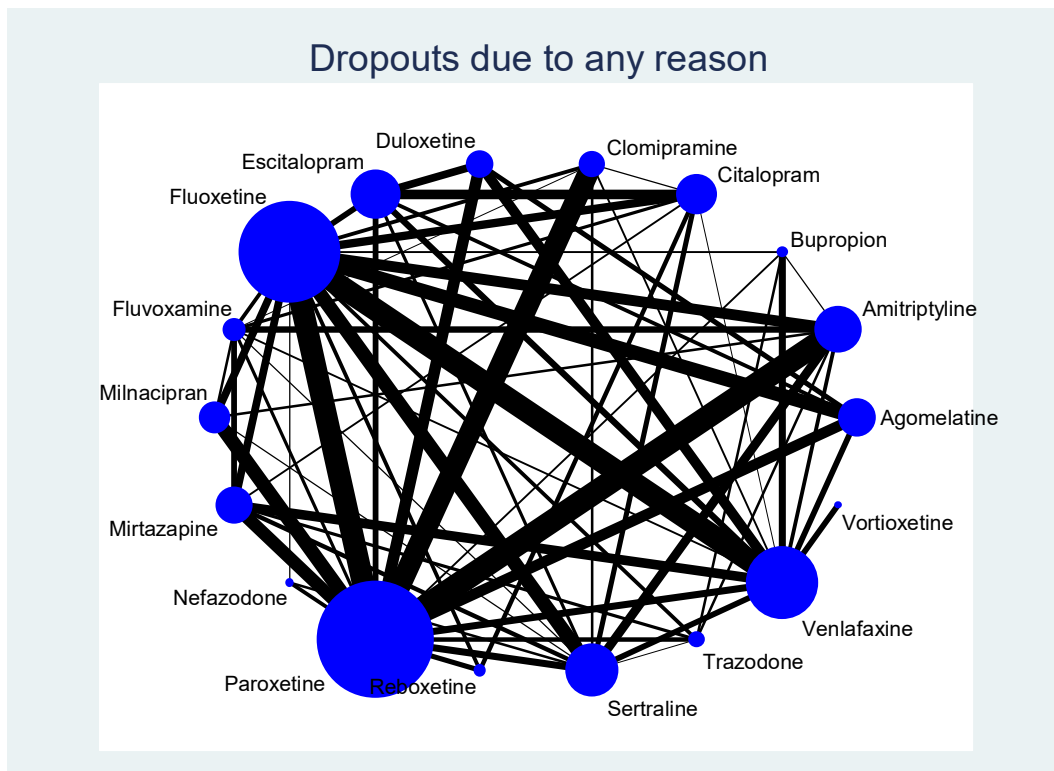



### Dropouts due to any reason

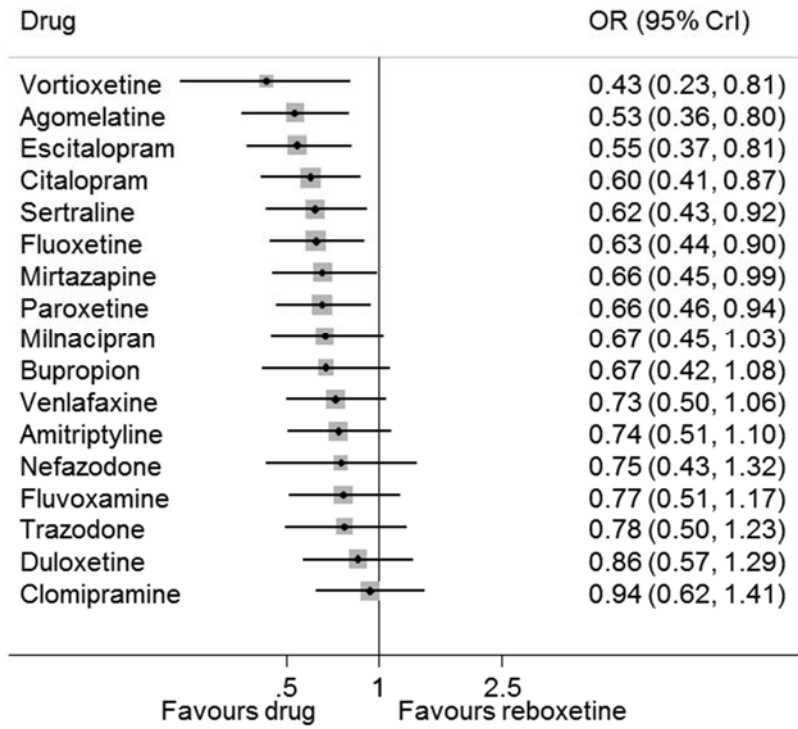

|                     |                     |                     |                     |                     |                     |                     |                     |                     |                     |                     |                     |                     |                     |                     |                     |                     |             |  |
|---------------------|---------------------|---------------------|---------------------|---------------------|---------------------|---------------------|---------------------|---------------------|---------------------|---------------------|---------------------|---------------------|---------------------|---------------------|---------------------|---------------------|-------------|--|
|                     |                     |                     |                     |                     |                     |                     |                     |                     |                     |                     |                     |                     |                     |                     |                     |                     |             |  |
| <b>Agom</b>         |                     |                     |                     |                     |                     |                     |                     |                     |                     |                     |                     |                     |                     |                     |                     |                     |             |  |
| 0.72<br>(0.55,0.92) | <b>Amit</b>         |                     |                     |                     |                     |                     |                     |                     |                     |                     |                     |                     |                     |                     |                     |                     |             |  |
| 0.80<br>(0.54,1.15) | 1.10<br>(0.78,1.58) | <b>Bupr</b>         |                     |                     |                     |                     |                     |                     |                     |                     |                     |                     |                     |                     |                     |                     |             |  |
| 0.89<br>(0.66,1.19) | 1.23<br>(0.94,1.64) | 1.11<br>(0.76,1.67) | <b>Cita</b>         |                     |                     |                     |                     |                     |                     |                     |                     |                     |                     |                     |                     |                     |             |  |
| 0.57<br>(0.42,0.77) | 0.79<br>(0.60,1.05) | 0.71<br>(0.49,1.07) | 0.64<br>(0.47,0.87) | <b>Clom</b>         |                     |                     |                     |                     |                     |                     |                     |                     |                     |                     |                     |                     |             |  |
| 0.62<br>(0.47,0.82) | 0.87<br>(0.66,1.15) | 0.78<br>(0.53,1.18) | 0.70<br>(0.51,0.95) | 1.10<br>(0.80,1.51) | <b>Dulo</b>         |                     |                     |                     |                     |                     |                     |                     |                     |                     |                     |                     |             |  |
| 0.97<br>(0.74,1.27) | 1.35<br>(1.05,1.74) | 1.23<br>(0.84,1.80) | 1.09<br>(0.85,1.42) | 1.71<br>(1.27,2.29) | 1.56<br>(1.19,2.01) | <b>Esci</b>         |                     |                     |                     |                     |                     |                     |                     |                     |                     |                     |             |  |
| 0.85<br>(0.68,1.05) | 1.18<br>(0.99,1.42) | 1.07<br>(0.76,1.50) | 0.96<br>(0.76,1.21) | 1.49<br>(1.16,1.90) | 1.37<br>(1.06,1.73) | 0.87<br>(0.70,1.09) | <b>Fluo</b>         |                     |                     |                     |                     |                     |                     |                     |                     |                     |             |  |
| 0.69<br>(0.51,0.97) | 0.97<br>(0.74,1.24) | 0.87<br>(0.59,1.30) | 0.78<br>(0.57,1.06) | 1.22<br>(0.88,1.67) | 1.12<br>(0.80,1.53) | 0.71<br>(0.53,0.96) | 0.82<br>(0.64,1.04) | <b>Fluv</b>         |                     |                     |                     |                     |                     |                     |                     |                     |             |  |
| 0.79<br>(0.58,1.09) | 1.10<br>(0.84,1.45) | 1.00<br>(0.66,1.49) | 0.89<br>(0.64,1.23) | 1.40<br>(1.00,1.92) | 1.28<br>(0.91,1.75) | 0.81<br>(0.60,1.11) | 0.94<br>(0.72,1.20) | 1.14<br>(0.84,1.56) | <b>Milin</b>        |                     |                     |                     |                     |                     |                     |                     |             |  |
| 0.81<br>(0.61,1.05) | 1.12<br>(0.89,1.42) | 1.01<br>(0.70,1.47) | 0.91<br>(0.68,1.21) | 1.41<br>(1.05,1.91) | 1.30<br>(0.96,1.72) | 0.83<br>(0.63,1.08) | 0.95<br>(0.77,1.16) | 1.16<br>(0.89,1.52) | 1.02<br>(0.75,1.37) | <b>Mirt</b>         |                     |                     |                     |                     |                     |                     |             |  |
| 0.70<br>(0.44,1.14) | 0.98<br>(0.62,1.55) | 0.89<br>(0.51,1.54) | 0.79<br>(0.49,1.32) | 1.24<br>(0.76,2.00) | 1.13<br>(0.69,1.83) | 0.72<br>(0.45,1.18) | 0.83<br>(0.54,1.30) | 1.01<br>(0.62,1.71) | 0.88<br>(0.54,1.44) | 0.87<br>(0.55,1.41) | <b>Nefa</b>         |                     |                     |                     |                     |                     |             |  |
| 0.81<br>(0.65,1.00) | 1.12<br>(0.95,1.34) | 1.02<br>(0.73,1.43) | 0.91<br>(0.71,1.17) | 1.42<br>(1.12,1.79) | 1.30<br>(1.02,1.63) | 0.83<br>(0.67,1.03) | 0.95<br>(0.83,1.09) | 1.16<br>(0.90,1.49) | 1.02<br>(0.80,1.31) | 1.00<br>(0.82,1.23) | 1.15<br>(0.74,1.78) | <b>Paro</b>         |                     |                     |                     |                     |             |  |
| 0.53<br>(0.36,0.80) | 0.74<br>(0.51,1.10) | 0.67<br>(0.42,1.08) | 0.60<br>(0.41,0.87) | 0.94<br>(0.62,1.41) | 0.86<br>(0.57,1.29) | 0.55<br>(0.37,0.81) | 0.63<br>(0.44,0.90) | 0.77<br>(0.51,1.17) | 0.67<br>(0.45,1.03) | 0.66<br>(0.45,0.99) | 0.75<br>(0.43,1.32) | 0.66<br>(0.46,0.94) | <b>Rebo</b>         |                     |                     |                     |             |  |
| 0.86<br>(0.66,1.13) | 1.20<br>(0.97,1.47) | 1.08<br>(0.75,1.56) | 0.97<br>(0.74,1.25) | 1.51<br>(1.15,1.96) | 1.38<br>(1.04,1.80) | 0.88<br>(0.69,1.12) | 1.01<br>(0.84,1.21) | 1.23<br>(0.94,1.63) | 1.08<br>(0.82,1.44) | 1.06<br>(0.84,1.35) | 1.23<br>(0.77,1.90) | 1.06<br>(0.88,1.28) | 1.61<br>(1.09,2.34) | <b>Sert</b>         |                     |                     |             |  |
| 0.69<br>(0.48,0.98) | 0.96<br>(0.70,1.31) | 0.87<br>(0.57,1.30) | 0.77<br>(0.53,1.13) | 1.21<br>(0.83,1.73) | 1.10<br>(0.76,1.59) | 0.70<br>(0.49,1.00) | 0.81<br>(0.60,1.09) | 0.99<br>(0.69,1.42) | 0.86<br>(0.60,1.25) | 0.85<br>(0.62,1.18) | 0.98<br>(0.57,1.64) | 0.85<br>(0.63,1.15) | 1.29<br>(0.81,2.01) | 0.80<br>(0.58,1.11) | <b>Traz</b>         |                     |             |  |
| 0.74<br>(0.58,0.92) | 1.02<br>(0.83,1.26) | 0.92<br>(0.66,1.30) | 0.83<br>(0.64,1.07) | 1.29<br>(0.99,1.67) | 1.18<br>(0.92,1.49) | 0.75<br>(0.60,0.94) | 0.87<br>(0.74,1.01) | 1.06<br>(0.80,1.38) | 0.93<br>(0.71,1.22) | 0.91<br>(0.73,1.13) | 1.04<br>(0.66,1.65) | 0.91<br>(0.77,1.07) | 1.38<br>(0.94,1.99) | 0.86<br>(0.70,1.05) | 1.07<br>(0.77,1.47) | <b>Venl</b>         |             |  |
| 1.24<br>(0.71,2.19) | 1.72<br>(1.00,3.05) | 1.55<br>(0.85,2.94) | 1.40<br>(0.78,2.48) | 2.20<br>(1.22,3.90) | 1.99<br>(1.13,3.52) | 1.27<br>(0.73,2.25) | 1.46<br>(0.85,2.53) | 1.78<br>(1.00,3.24) | 1.56<br>(0.89,2.84) | 1.53<br>(0.89,2.72) | 1.76<br>(0.90,3.56) | 1.53<br>(0.90,2.66) | 2.32<br>(1.24,4.41) | 1.45<br>(0.84,2.54) | 1.80<br>(0.98,3.38) | 1.69<br>(1.01,2.86) | <b>Vort</b> |  |

OR<1 favour the treatment in the column

### 8.1.3 Efficacy continuous

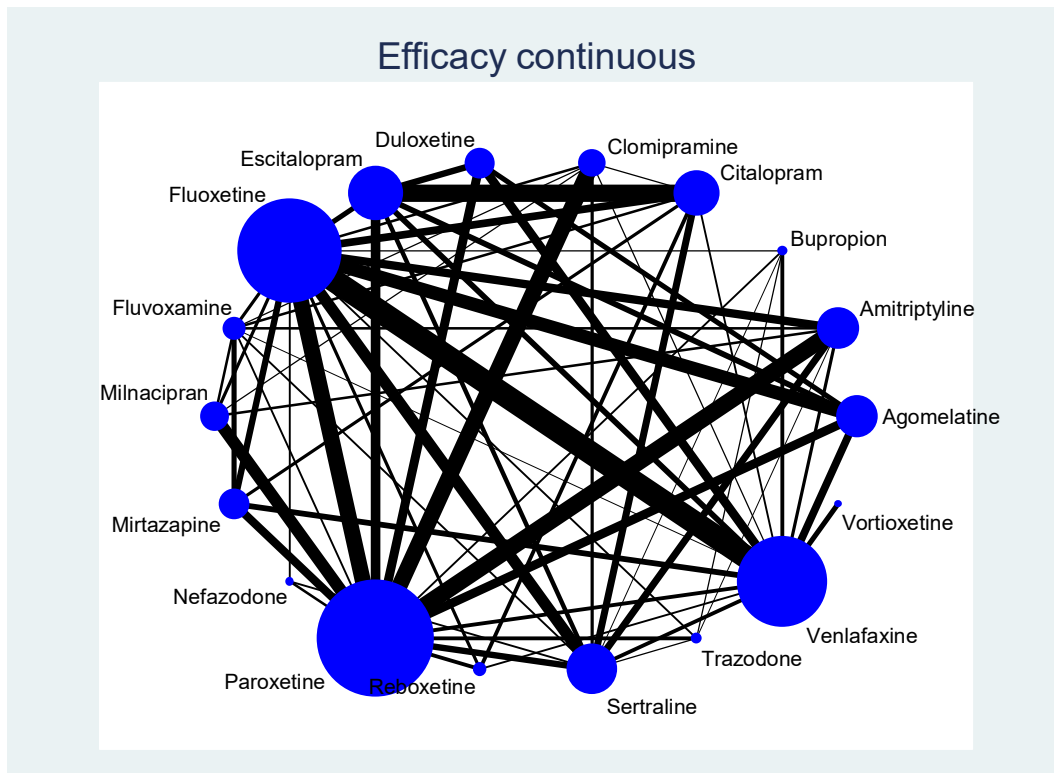

Efficacy continuous

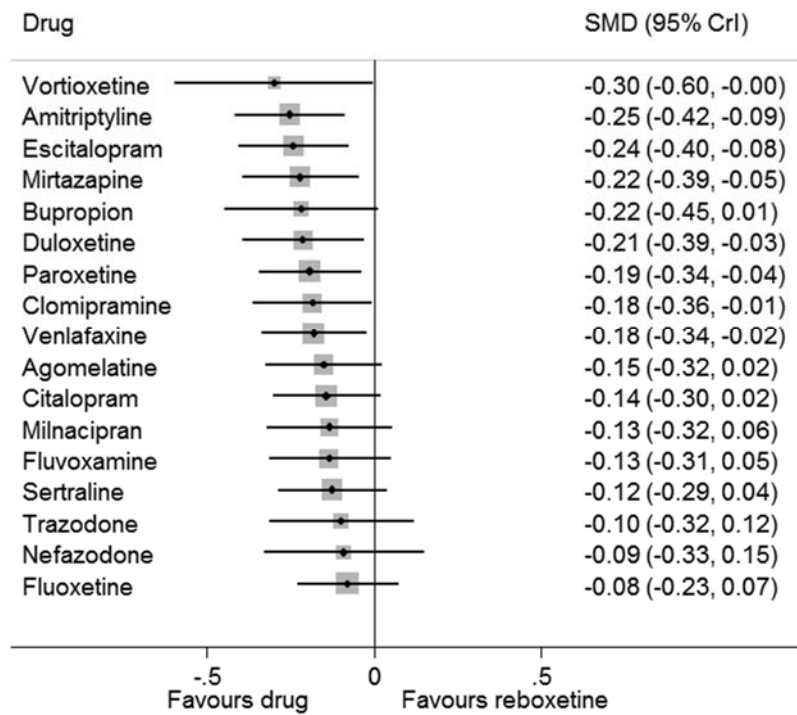

|                    |                    |                    |                    |                    |                    |                    |                    |                    |                    |                    |                    |                    |                   |                    |                   |                   |             |
|--------------------|--------------------|--------------------|--------------------|--------------------|--------------------|--------------------|--------------------|--------------------|--------------------|--------------------|--------------------|--------------------|-------------------|--------------------|-------------------|-------------------|-------------|
|                    |                    |                    |                    |                    |                    |                    |                    |                    |                    |                    |                    |                    |                   |                    |                   |                   |             |
| 0.10 (-0.02,0.22)  | <b>Amit</b>        |                    |                    |                    |                    |                    |                    |                    |                    |                    |                    |                    |                   |                    |                   |                   |             |
| 0.07 (-0.13,0.26)  | -0.04 (-0.22,0.16) | <b>Bupr</b>        |                    |                    |                    |                    |                    |                    |                    |                    |                    |                    |                   |                    |                   |                   |             |
| -0.01 (-0.13,0.11) | -0.11 (-0.23,0.01) | -0.08 (-0.27,0.12) | <b>Cita</b>        |                    |                    |                    |                    |                    |                    |                    |                    |                    |                   |                    |                   |                   |             |
| 0.03 (-0.11,0.17)  | -0.07 (-0.19,0.06) | -0.03 (-0.24,0.17) | 0.04 (-0.09,0.12)  | <b>Clom</b>        |                    |                    |                    |                    |                    |                    |                    |                    |                   |                    |                   |                   |             |
| 0.06 (-0.07,0.19)  | -0.04 (-0.17,0.09) | -0.00 (-0.21,0.20) | 0.07 (-0.06,0.21)  | 0.03 (-0.12,0.18)  | <b>Dulo</b>        |                    |                    |                    |                    |                    |                    |                    |                   |                    |                   |                   |             |
| 0.09 (-0.02,0.20)  | -0.01 (-0.12,0.10) | 0.02 (-0.17,0.21)  | 0.10 (0.01,0.19)   | 0.06 (-0.08,0.19)  | 0.03 (-0.09,0.15)  | <b>Esci</b>        |                    |                    |                    |                    |                    |                    |                   |                    |                   |                   |             |
| -0.07 (-0.17,0.03) | -0.17 (-0.26,0.09) | -0.14 (-0.32,0.04) | -0.06 (-0.16,0.03) | -0.10 (-0.22,0.01) | -0.13 (-0.25,0.02) | -0.16 (-0.25,0.07) | <b>Fluo</b>        |                    |                    |                    |                    |                    |                   |                    |                   |                   |             |
| -0.02 (-0.16,0.12) | -0.12 (-0.25,0.01) | -0.08 (-0.29,0.12) | -0.01 (-0.14,0.12) | -0.05 (-0.20,0.09) | -0.08 (-0.23,0.07) | -0.11 (-0.24,0.02) | 0.05 (-0.06,0.17)  | <b>Fluv</b>        |                    |                    |                    |                    |                   |                    |                   |                   |             |
| -0.02 (-0.17,0.13) | -0.12 (-0.25,0.01) | -0.08 (-0.30,0.13) | -0.01 (-0.16,0.14) | -0.05 (-0.20,0.10) | -0.08 (-0.24,0.08) | -0.11 (-0.25,0.04) | 0.05 (-0.07,0.18)  | 0.00 (-0.15,0.15)  | <b>Miln</b>        |                    |                    |                    |                   |                    |                   |                   |             |
| 0.07 (-0.06,0.20)  | -0.03 (-0.16,0.09) | 0.00 (-0.20,0.20)  | 0.08 (-0.04,0.22)  | 0.04 (-0.11,0.18)  | 0.01 (-0.14,0.15)  | -0.02 (-0.14,0.10) | 0.14 (0.04,0.25)   | 0.09 (-0.04,0.22)  | 0.09 (-0.06,0.24)  | <b>Mirt</b>        |                    |                    |                   |                    |                   |                   |             |
| -0.06 (-0.27,0.15) | -0.16 (-0.36,0.04) | -0.13 (-0.38,0.13) | -0.05 (-0.26,0.16) | -0.09 (-0.31,0.12) | -0.12 (-0.34,0.09) | -0.15 (-0.36,0.05) | 0.01 (-0.18,0.20)  | -0.04 (-0.26,0.17) | -0.04 (-0.26,0.18) | -0.13 (-0.34,0.08) | <b>Nefa</b>        |                    |                   |                    |                   |                   |             |
| 0.04 (-0.06,0.14)  | -0.06 (-0.14,0.02) | -0.02 (-0.20,0.15) | 0.05 (-0.05,0.15)  | 0.01 (-0.10,0.12)  | -0.02 (-0.13,0.09) | -0.05 (-0.14,0.04) | 0.11 (0.05,0.18)   | 0.06 (-0.06,0.17)  | 0.06 (-0.06,0.18)  | -0.03 (-0.13,0.08) | 0.10 (-0.09,0.29)  | <b>Paro</b>        |                   |                    |                   |                   |             |
| -0.15 (-0.32,0.02) | -0.25 (-0.42,0.09) | -0.22 (-0.45,0.01) | -0.14 (-0.30,0.02) | -0.18 (-0.36,0.01) | -0.21 (-0.39,0.03) | -0.24 (-0.40,0.08) | -0.08 (-0.23,0.07) | -0.13 (-0.31,0.05) | -0.13 (-0.32,0.06) | -0.22 (-0.39,0.05) | -0.09 (-0.33,0.15) | -0.19 (-0.34,0.04) | <b>Rebo</b>       |                    |                   |                   |             |
| -0.03 (-0.15,0.09) | -0.13 (-0.23,0.03) | -0.09 (-0.28,0.10) | -0.02 (-0.12,0.09) | -0.06 (-0.18,0.06) | -0.09 (-0.22,0.04) | -0.12 (-0.22,0.01) | 0.05 (-0.04,0.13)  | -0.01 (-0.13,0.11) | -0.01 (-0.15,0.13) | -0.10 (-0.22,0.03) | 0.03 (-0.16,0.23)  | -0.07 (-0.15,0.02) | 0.12 (-0.04,0.29) | <b>Sert</b>        |                   |                   |             |
| -0.05 (-0.24,0.14) | -0.15 (-0.33,0.02) | -0.12 (-0.33,0.10) | -0.04 (-0.22,0.14) | -0.08 (-0.28,0.12) | -0.11 (-0.31,0.08) | -0.14 (-0.32,0.04) | 0.02 (-0.15,0.19)  | -0.03 (-0.22,0.16) | -0.03 (-0.23,0.17) | -0.12 (-0.31,0.07) | 0.01 (-0.24,0.25)  | -0.09 (-0.26,0.07) | 0.10 (-0.12,0.32) | -0.03 (-0.20,0.15) | <b>Traz</b>       |                   |             |
| 0.03 (-0.08,0.13)  | -0.07 (-0.17,0.03) | -0.04 (-0.21,0.14) | 0.04 (-0.06,0.16)  | -0.00 (-0.13,0.13) | -0.03 (-0.15,0.08) | -0.06 (-0.15,0.04) | 0.10 (0.03,0.18)   | 0.05 (-0.07,0.17)  | 0.05 (-0.09,0.18)  | -0.04 (-0.15,0.07) | 0.09 (-0.11,0.29)  | -0.01 (-0.09,0.07) | 0.18 (0.02,0.34)  | 0.06 (-0.04,0.19)  | 0.08 (-0.09,0.25) | <b>Venl</b>       |             |
| 0.15 (-0.13,0.43)  | 0.05 (-0.23,0.33)  | 0.08 (-0.23,0.43)  | 0.16 (-0.12,0.44)  | 0.12 (-0.17,0.41)  | 0.08 (-0.19,0.33)  | 0.06 (-0.21,0.33)  | 0.22 (-0.04,0.49)  | 0.17 (-0.12,0.46)  | 0.17 (-0.12,0.46)  | 0.08 (-0.20,0.33)  | 0.21 (-0.11,0.51)  | 0.11 (-0.16,0.38)  | 0.30 (0.00,0.60)  | 0.17 (-0.10,0.45)  | 0.20 (-0.11,0.51) | 0.12 (-0.14,0.38) | <b>Vort</b> |

SMD<0 favours the treatment in the column

## 8.1.4 Remission

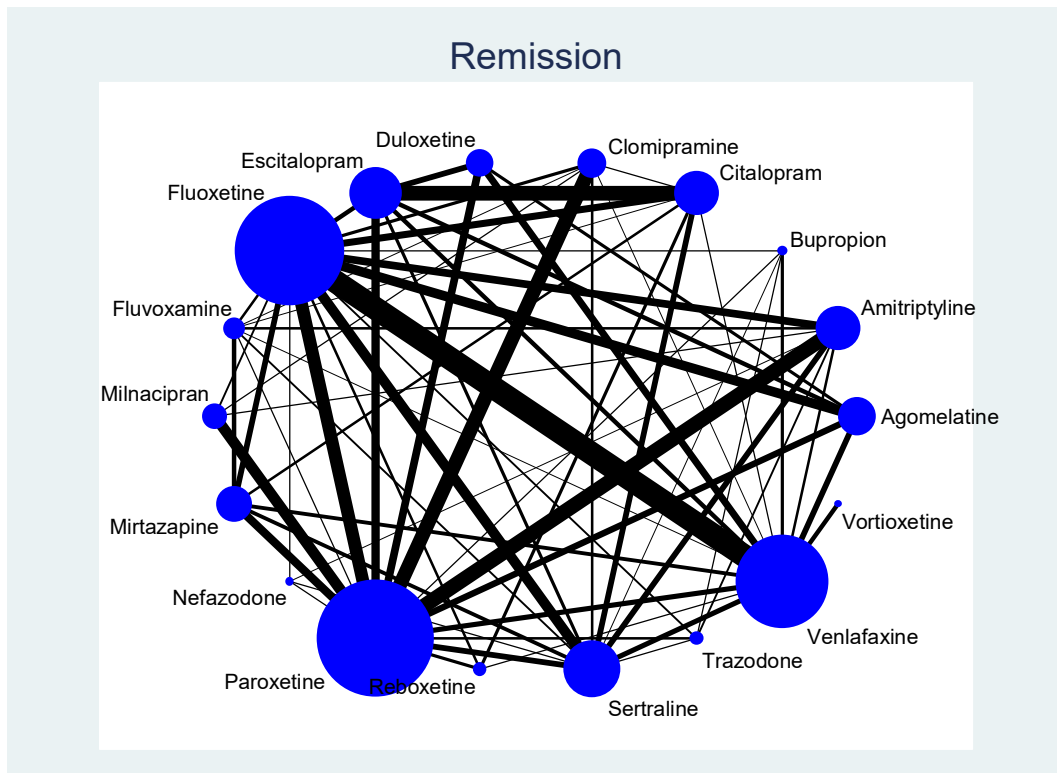

## Remission

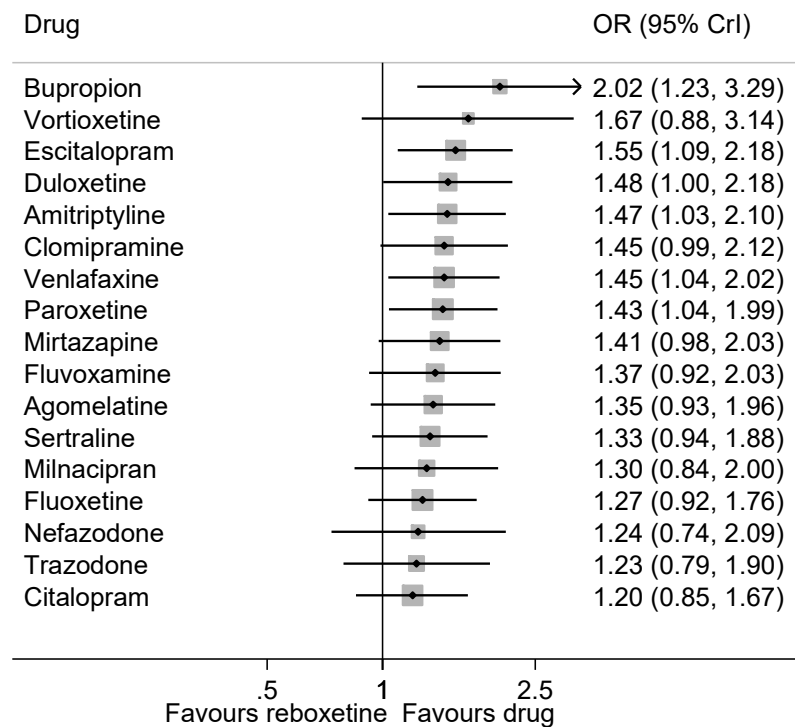

|                     |                     |                     |                     |                     |                     |                     |                     |                     |                     |                     |                     |                     |                     |                     |                     |                     |                  |
|---------------------|---------------------|---------------------|---------------------|---------------------|---------------------|---------------------|---------------------|---------------------|---------------------|---------------------|---------------------|---------------------|---------------------|---------------------|---------------------|---------------------|------------------|
| Agom                |                     |                     |                     |                     |                     |                     |                     |                     |                     |                     |                     |                     |                     |                     |                     |                     |                  |
| 0.92<br>(0.71,1.19) | <b>Amit</b>         |                     |                     |                     |                     |                     |                     |                     |                     |                     |                     |                     |                     |                     |                     |                     |                  |
| 0.67<br>(0.44,1.03) | 0.73<br>(0.48,1.10) | <b>Bupr</b>         |                     |                     |                     |                     |                     |                     |                     |                     |                     |                     |                     |                     |                     |                     |                  |
| 1.13<br>(0.87,1.48) | 1.23<br>(0.97,1.57) | 1.69<br>(1.11,2.57) | <b>Cita</b>         |                     |                     |                     |                     |                     |                     |                     |                     |                     |                     |                     |                     |                     |                  |
| 0.94<br>(0.70,1.26) | 1.02<br>(0.78,1.32) | 1.40<br>(0.90,2.17) | 0.83<br>(0.63,1.09) | <b>Clom</b>         |                     |                     |                     |                     |                     |                     |                     |                     |                     |                     |                     |                     |                  |
| 0.91<br>(0.69,1.21) | 0.99<br>(0.75,1.32) | 1.36<br>(0.87,2.12) | 0.81<br>(0.61,1.07) | 0.98<br>(0.71,1.34) | <b>Dulo</b>         |                     |                     |                     |                     |                     |                     |                     |                     |                     |                     |                     |                  |
| 0.87<br>(0.69,1.12) | 0.95<br>(0.76,1.20) | 1.30<br>(0.86,1.97) | 0.77<br>(0.64,0.94) | 0.93<br>(0.71,1.23) | 0.96<br>(0.74,1.24) | <b>Esci</b>         |                     |                     |                     |                     |                     |                     |                     |                     |                     |                     |                  |
| 1.06<br>(0.86,1.33) | 1.16<br>(0.97,1.38) | 1.59<br>(1.08,2.35) | 0.94<br>(0.77,1.15) | 1.14<br>(0.90,1.44) | 1.16<br>(0.91,1.50) | 1.22<br>(1.01,1.47) | <b>Fluo</b>         |                     |                     |                     |                     |                     |                     |                     |                     |                     |                  |
| 0.99<br>(0.72,1.36) | 1.08<br>(0.82,1.41) | 1.47<br>(0.94,2.31) | 0.87<br>(0.65,1.17) | 1.06<br>(0.77,1.44) | 1.08<br>(0.77,1.51) | 1.13<br>(0.84,1.51) | 0.93<br>(0.72,1.19) | <b>Fluv</b>         |                     |                     |                     |                     |                     |                     |                     |                     |                  |
| 1.04<br>(0.73,1.49) | 1.13<br>(0.83,1.56) | 1.55<br>(0.96,2.51) | 0.92<br>(0.65,1.30) | 1.11<br>(0.79,1.57) | 1.14<br>(0.79,1.65) | 1.19<br>(0.85,1.67) | 0.98<br>(0.72,1.32) | 1.05<br>(0.73,1.54) | <b>Miin</b>         |                     |                     |                     |                     |                     |                     |                     |                  |
| 0.96<br>(0.73,1.27) | 1.05<br>(0.82,1.33) | 1.43<br>(0.94,2.19) | 0.85<br>(0.66,1.09) | 1.03<br>(0.77,1.36) | 1.05<br>(0.78,1.42) | 1.10<br>(0.86,1.41) | 0.90<br>(0.73,1.11) | 0.97<br>(0.74,1.28) | 0.92<br>(0.65,1.31) | <b>Mirt</b>         |                     |                     |                     |                     |                     |                     |                  |
| 1.09<br>(0.68,1.74) | 1.19<br>(0.76,1.85) | 1.63<br>(0.92,2.87) | 0.97<br>(0.61,1.53) | 1.17<br>(0.72,1.88) | 1.20<br>(0.74,1.94) | 1.25<br>(0.79,1.97) | 1.03<br>(0.67,1.57) | 1.11<br>(0.68,1.78) | 1.05<br>(0.63,1.74) | 1.14<br>(0.72,1.81) | <b>Nefa</b>         |                     |                     |                     |                     |                     |                  |
| 0.94<br>(0.76,1.18) | 1.03<br>(0.86,1.22) | 1.41<br>(0.95,2.08) | 0.83<br>(0.68,1.03) | 1.01<br>(0.81,1.26) | 1.03<br>(0.81,1.31) | 1.08<br>(0.89,1.31) | 0.89<br>(0.77,1.02) | 0.95<br>(0.74,1.23) | 0.91<br>(0.68,1.21) | 0.98<br>(0.80,1.21) | 0.86<br>(0.56,1.33) | <b>Paro</b>         |                     |                     |                     |                     |                  |
| 1.35<br>(0.93,1.96) | 1.47<br>(1.03,2.10) | 2.02<br>(1.23,3.29) | 1.20<br>(0.85,1.67) | 1.45<br>(0.99,2.12) | 1.48<br>(1.00,2.18) | 1.55<br>(1.09,2.18) | 1.27<br>(0.92,1.76) | 1.37<br>(0.92,2.03) | 1.30<br>(0.84,2.00) | 1.41<br>(0.98,2.03) | 1.24<br>(0.74,2.09) | 1.43<br>(1.04,1.99) | <b>Rebo</b>         |                     |                     |                     |                  |
| 1.02<br>(0.79,1.32) | 1.11<br>(0.91,1.36) | 1.52<br>(1.01,2.28) | 0.90<br>(0.72,1.12) | 1.09<br>(0.84,1.40) | 1.11<br>(0.85,1.47) | 1.17<br>(0.94,1.44) | 0.96<br>(0.81,1.13) | 1.03<br>(0.79,1.35) | 0.98<br>(0.70,1.36) | 1.06<br>(0.84,1.34) | 0.93<br>(0.61,1.44) | 1.08<br>(0.90,1.29) | 0.75<br>(0.53,1.07) | <b>Sert</b>         |                     |                     |                  |
| 1.10<br>(0.77,1.59) | 1.20<br>(0.87,1.65) | 1.64<br>(1.05,2.58) | 0.98<br>(0.68,1.39) | 1.18<br>(0.81,1.71) | 1.21<br>(0.82,1.77) | 1.26<br>(0.89,1.79) | 1.04<br>(0.76,1.41) | 1.12<br>(0.76,1.64) | 1.06<br>(0.70,1.60) | 1.15<br>(0.80,1.64) | 1.01<br>(0.61,1.70) | 1.17<br>(0.86,1.60) | 0.82<br>(0.53,1.26) | 1.08<br>(0.78,1.50) | <b>Traz</b>         |                     |                  |
| 0.94<br>(0.75,1.17) | 1.02<br>(0.83,1.25) | 1.40<br>(0.95,2.06) | 0.83<br>(0.67,1.03) | 1.00<br>(0.78,1.29) | 1.03<br>(0.80,1.31) | 1.07<br>(0.88,1.31) | 0.88<br>(0.75,1.02) | 0.95<br>(0.72,1.24) | 0.90<br>(0.65,1.24) | 0.98<br>(0.78,1.22) | 0.86<br>(0.55,1.33) | 0.99<br>(0.84,1.17) | 0.69<br>(0.50,0.97) | 0.92<br>(0.76,1.11) | 0.85<br>(0.61,1.18) | <b>Venl</b>         |                  |
| 0.81<br>(0.45,1.45) | 0.88<br>(0.50,1.56) | 1.21<br>(0.62,2.33) | 0.72<br>(0.40,1.28) | 0.87<br>(0.48,1.56) | 0.89<br>(0.49,1.59) | 0.93<br>(0.52,1.64) | 0.76<br>(0.43,1.32) | 0.82<br>(0.45,1.48) | 0.78<br>(0.41,1.44) | 0.84<br>(0.47,1.50) | 0.74<br>(0.37,1.48) | 0.86<br>(0.49,1.50) | 0.60<br>(0.32,1.13) | 0.80<br>(0.45,1.40) | 0.73<br>(0.39,1.37) | 0.87<br>(0.51,1.47) | <b>Vo<br/>rt</b> |

OR>1 favours the treatment in the column

### 8.1.5 Dropouts due to adverse events

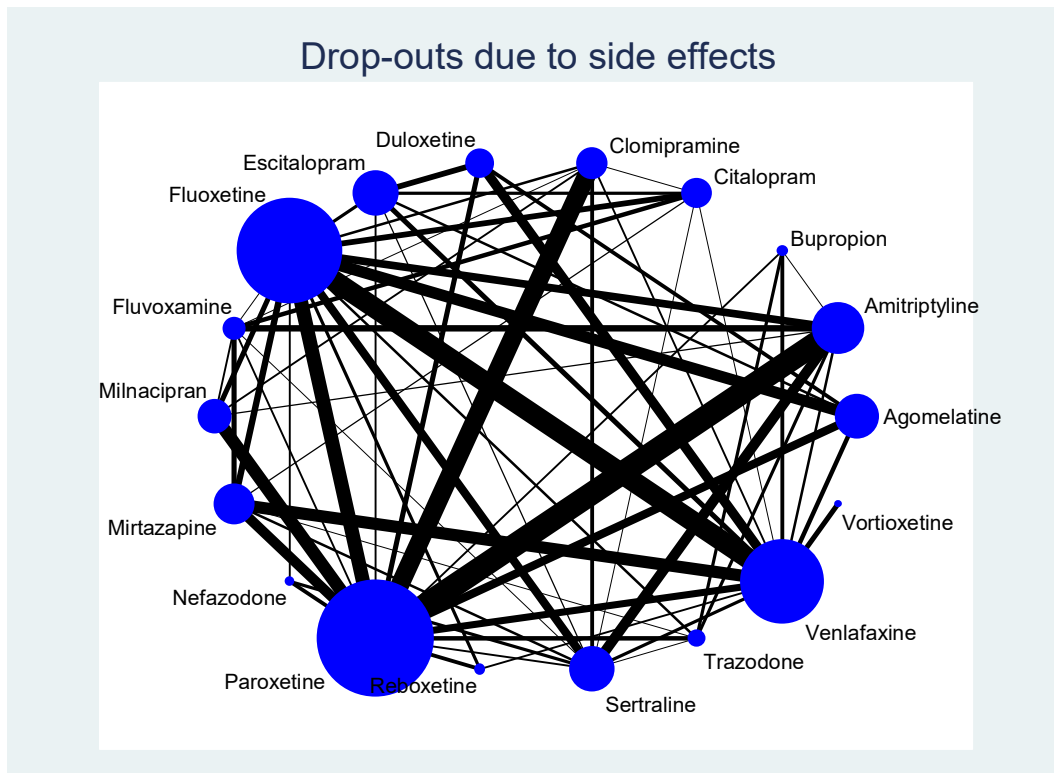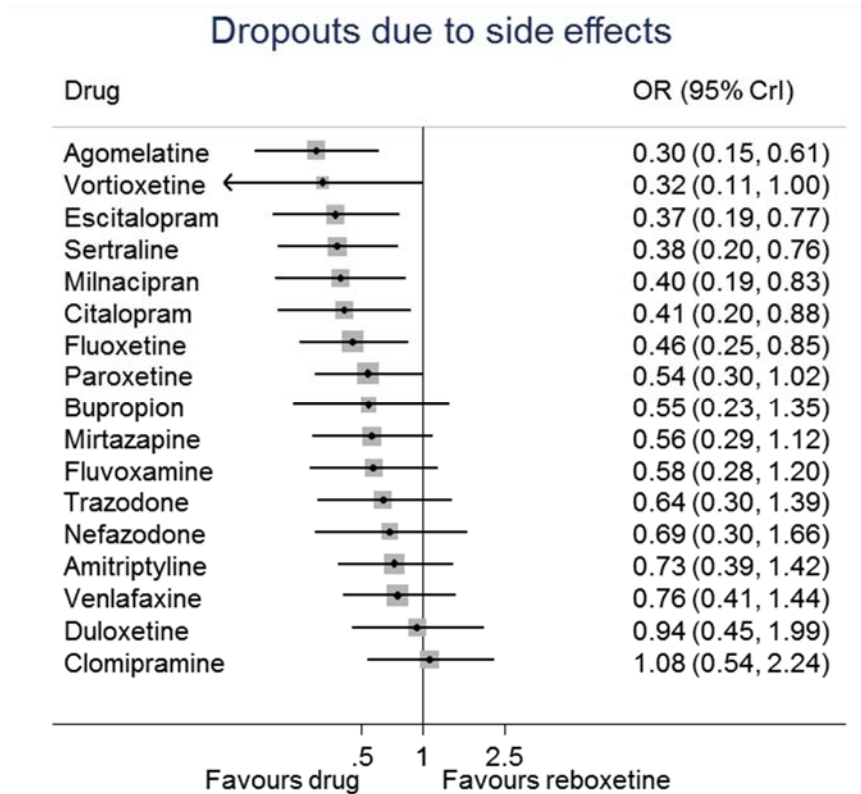

|                     |                     |                     |                     |                     |                     |                     |                     |                     |                     |                     |                     |                     |                     |                     |                     |                     |             |  |
|---------------------|---------------------|---------------------|---------------------|---------------------|---------------------|---------------------|---------------------|---------------------|---------------------|---------------------|---------------------|---------------------|---------------------|---------------------|---------------------|---------------------|-------------|--|
| Agom                |                     |                     |                     |                     |                     |                     |                     |                     |                     |                     |                     |                     |                     |                     |                     |                     |             |  |
| 0.41<br>(0.26,0.64) | <b>Amit</b>         |                     |                     |                     |                     |                     |                     |                     |                     |                     |                     |                     |                     |                     |                     |                     |             |  |
| 0.55<br>(0.26,1.13) | 1.33<br>(0.68,2.61) | <b>Bupr</b>         |                     |                     |                     |                     |                     |                     |                     |                     |                     |                     |                     |                     |                     |                     |             |  |
| 0.73<br>(0.41,1.28) | 1.76<br>(1.06,2.96) | 1.32<br>(0.61,2.89) | <b>Cita</b>         |                     |                     |                     |                     |                     |                     |                     |                     |                     |                     |                     |                     |                     |             |  |
| 0.28<br>(0.16,0.47) | 0.67<br>(0.44,1.04) | 0.51<br>(0.24,1.05) | 0.38<br>(0.21,0.68) | <b>Clom</b>         |                     |                     |                     |                     |                     |                     |                     |                     |                     |                     |                     |                     |             |  |
| 0.32<br>(0.19,0.53) | 0.78<br>(0.47,1.29) | 0.58<br>(0.27,1.26) | 0.44<br>(0.24,0.80) | 1.15<br>(0.66,2.04) | <b>Dulo</b>         |                     |                     |                     |                     |                     |                     |                     |                     |                     |                     |                     |             |  |
| 0.81<br>(0.50,1.30) | 1.95<br>(1.23,3.13) | 1.46<br>(0.70,3.10) | 1.11<br>(0.66,1.88) | 2.89<br>(1.70,5.00) | 2.51<br>(1.55,4.10) | <b>Esci</b>         |                     |                     |                     |                     |                     |                     |                     |                     |                     |                     |             |  |
| 0.66<br>(0.44,0.97) | 1.60<br>(1.19,2.16) | 1.20<br>(0.62,2.34) | 0.91<br>(0.57,1.44) | 2.38<br>(1.58,3.59) | 2.06<br>(1.30,3.28) | 0.82<br>(0.54,1.24) | <b>Fluo</b>         |                     |                     |                     |                     |                     |                     |                     |                     |                     |             |  |
| 0.53<br>(0.30,0.89) | 1.27<br>(0.83,1.94) | 0.95<br>(0.45,2.00) | 0.72<br>(0.42,1.23) | 1.89<br>(1.11,3.20) | 1.63<br>(0.91,2.94) | 0.65<br>(0.38,1.12) | 0.79<br>(0.52,1.21) | <b>Fluv</b>         |                     |                     |                     |                     |                     |                     |                     |                     |             |  |
| 0.76<br>(0.44,1.34) | 1.84<br>(1.16,3.02) | 1.38<br>(0.65,3.02) | 1.05<br>(0.57,1.94) | 2.73<br>(1.63,4.73) | 2.37<br>(1.30,4.41) | 0.94<br>(0.53,1.68) | 1.15<br>(0.74,1.83) | 1.45<br>(0.85,2.53) | <b>Miln</b>         |                     |                     |                     |                     |                     |                     |                     |             |  |
| 0.54<br>(0.33,0.86) | 1.29<br>(0.88,1.92) | 0.97<br>(0.48,1.97) | 0.73<br>(0.43,1.23) | 1.92<br>(1.20,3.10) | 1.66<br>(0.98,2.83) | 0.66<br>(0.40,1.08) | 0.81<br>(0.57,1.14) | 1.02<br>(0.65,1.60) | 0.70<br>(0.41,1.17) | <b>Mirt</b>         |                     |                     |                     |                     |                     |                     |             |  |
| 0.44<br>(0.21,0.89) | 1.05<br>(0.55,2.04) | 0.79<br>(0.33,1.91) | 0.60<br>(0.28,1.26) | 1.57<br>(0.77,3.17) | 1.36<br>(0.64,2.88) | 0.54<br>(0.26,1.12) | 0.66<br>(0.35,1.23) | 0.83<br>(0.40,1.71) | 0.57<br>(0.27,1.19) | 0.82<br>(0.41,1.61) | <b>Nefa</b>         |                     |                     |                     |                     |                     |             |  |
| 0.56<br>(0.37,0.83) | 1.35<br>(1.03,1.78) | 1.01<br>(0.53,1.95) | 0.76<br>(0.47,1.24) | 1.99<br>(1.39,2.94) | 1.73<br>(1.10,2.76) | 0.69<br>(0.45,1.05) | 0.84<br>(0.65,1.09) | 1.06<br>(0.70,1.62) | 0.73<br>(0.47,1.11) | 1.04<br>(0.74,1.48) | 1.28<br>(0.69,2.39) | <b>Paro</b>         |                     |                     |                     |                     |             |  |
| 0.30<br>(0.15,0.61) | 0.73<br>(0.39,1.42) | 0.55<br>(0.23,1.35) | 0.41<br>(0.20,0.88) | 1.08<br>(0.54,2.24) | 0.94<br>(0.45,1.99) | 0.37<br>(0.19,0.77) | 0.46<br>(0.25,0.85) | 0.58<br>(0.28,1.20) | 0.40<br>(0.19,0.83) | 0.56<br>(0.29,1.12) | 0.69<br>(0.30,1.66) | 0.54<br>(0.30,1.02) | <b>Rebo</b>         |                     |                     |                     |             |  |
| 0.79<br>(0.48,1.27) | 1.91<br>(1.33,2.76) | 1.43<br>(0.71,2.90) | 1.08<br>(0.64,1.83) | 2.83<br>(1.81,4.50) | 2.46<br>(1.45,4.17) | 0.98<br>(0.60,1.59) | 1.19<br>(0.84,1.69) | 1.50<br>(0.94,2.43) | 1.04<br>(0.61,1.74) | 1.48<br>(0.97,2.25) | 1.81<br>(0.95,3.46) | 1.42<br>(1.00,2.01) | 2.62<br>(1.32,5.10) | <b>Sert</b>         |                     |                     |             |  |
| 0.47<br>(0.26,0.85) | 1.14<br>(0.69,1.89) | 0.85<br>(0.43,1.71) | 0.65<br>(0.34,1.23) | 1.69<br>(0.93,3.06) | 1.46<br>(0.77,2.77) | 0.58<br>(0.32,1.06) | 0.71<br>(0.43,1.16) | 0.89<br>(0.49,1.63) | 0.62<br>(0.33,1.15) | 0.88<br>(0.50,1.52) | 1.08<br>(0.50,2.33) | 0.85<br>(0.52,1.37) | 1.56<br>(0.72,3.28) | 0.60<br>(0.34,1.03) | <b>Traz</b>         |                     |             |  |
| 0.40<br>(0.26,0.59) | 0.97<br>(0.69,1.36) | 0.72<br>(0.38,1.39) | 0.55<br>(0.34,0.89) | 1.43<br>(0.93,2.22) | 1.24<br>(0.80,1.93) | 0.50<br>(0.33,0.74) | 0.60<br>(0.46,0.79) | 0.76<br>(0.48,1.20) | 0.52<br>(0.32,0.85) | 0.75<br>(0.52,1.07) | 0.91<br>(0.48,1.77) | 0.72<br>(0.53,0.96) | 1.32<br>(0.69,2.46) | 0.51<br>(0.35,0.73) | 0.85<br>(0.50,1.43) | <b>Ven</b>          |             |  |
| 0.93<br>(0.34,2.56) | 2.25<br>(0.86,6.11) | 1.69<br>(0.56,5.24) | 1.28<br>(0.45,3.61) | 3.34<br>(1.22,9.36) | 2.90<br>(1.06,8.13) | 1.15<br>(0.42,3.22) | 1.40<br>(0.55,3.71) | 1.77<br>(0.64,4.99) | 1.22<br>(0.43,3.47) | 1.74<br>(0.66,4.72) | 2.13<br>(0.70,6.67) | 1.67<br>(0.64,4.43) | 3.09<br>(1.00,9.37) | 1.18<br>(0.44,3.20) | 1.98<br>(0.69,5.74) | 2.32<br>(0.94,5.94) | <b>Vort</b> |  |

Values<1 favour the treatment in the column



## 8.2 Assessment of transitivity

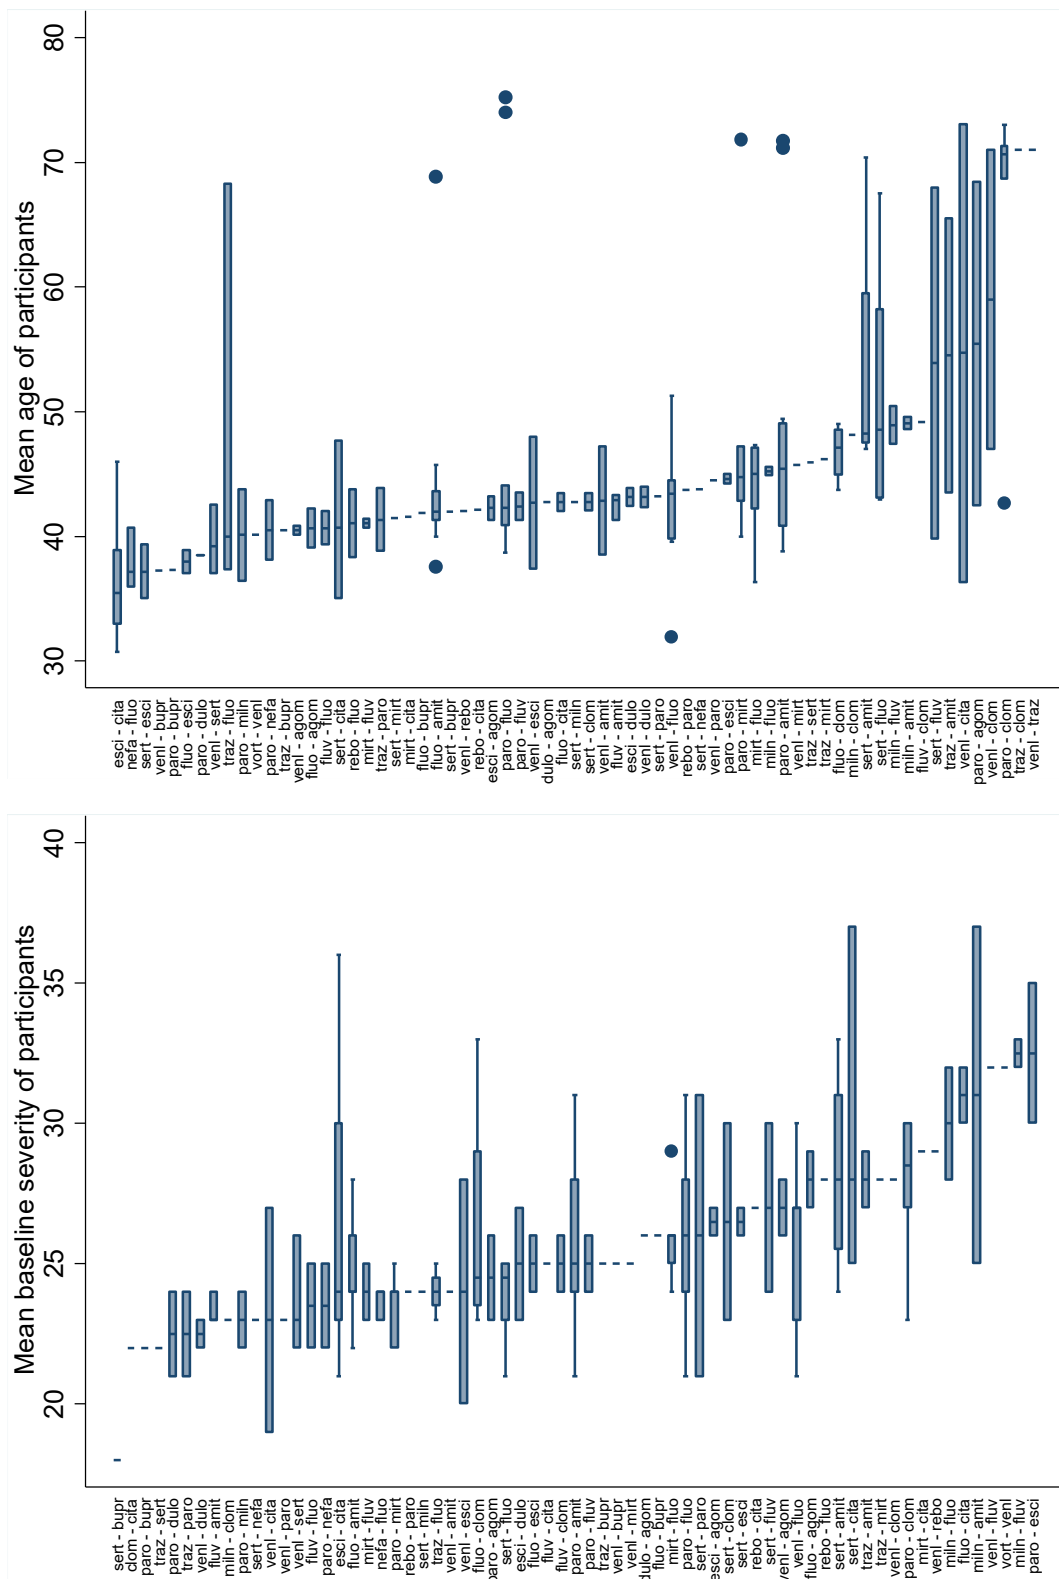

Examination of possible effect modifiers indicated that age was evenly distributed across comparisons but not baseline severity. However, we could not detect any important impact of the baseline severity in the previous meta-regressions.

### 8.3 Inconsistency

#### 8.3.1 Response

##### 8.3.1.1 Loop-specific approach

Loops With Evidence of Statistical Inconsistency:

| Loop           | IF    | seIF  | z_value | p_value | CI_95       | Loop_Heterog_tau2 |
|----------------|-------|-------|---------|---------|-------------|-------------------|
| cita-fluv-venl | 1.243 | 0.599 | 2.077   | 0.038   | (0.07,2.42) | 0.000             |
| clom-fluo-traz | 1.161 | 0.524 | 2.215   | 0.027   | (0.13,2.19) | 0.000             |
| fluv-sert-venl | 1.133 | 0.554 | 2.046   | 0.041   | (0.05,2.22) | 0.000             |
| cita-clom-fluo | 1.031 | 0.470 | 2.192   | 0.028   | (0.11,1.95) | 0.000             |
| agom-paro-venl | 0.927 | 0.387 | 2.396   | 0.017   | (0.17,1.69) | 0.028             |
| agom-dulo-esci | 0.844 | 0.348 | 2.424   | 0.015   | (0.16,1.53) | 0.000             |
| mirt-paro-venl | 0.843 | 0.420 | 2.007   | 0.045   | (0.02,1.67) | 0.054             |
| clom-fluo-sert | 0.801 | 0.356 | 2.249   | 0.025   | (0.10,1.50) | 0.000             |
| agom-dulo-venl | 0.690 | 0.319 | 2.160   | 0.031   | (0.06,1.32) | 0.000             |
| clom-fluo-paro | 0.645 | 0.307 | 2.100   | 0.036   | (0.04,1.25) | 0.019             |
| amit-fluo-sert | 0.533 | 0.246 | 2.164   | 0.030   | (0.05,1.02) | 0.000             |

Loops Without Evidence of Statistical Inconsistency:

| Loop                | IF    | seIF  | z_value | p_value | CI_95       | Loop_Heterog_tau2 |
|---------------------|-------|-------|---------|---------|-------------|-------------------|
| cita-clom-venl      | 1.891 | 1.255 | 1.507   | 0.132   | (0.00,4.35) | 0.492             |
| bupr-sert-traz      | 1.385 | 1.151 | 1.203   | 0.229   | (0.00,3.64) | 0.000             |
| fluo-miln-sert      | 1.242 | 0.964 | 1.288   | 0.198   | (0.00,3.13) | 0.019             |
| clom-fluo-fluv      | 1.149 | 0.613 | 1.873   | 0.061   | (0.00,2.35) | 0.000             |
| cita-sert-venl      | 1.118 | 0.892 | 1.253   | 0.210   | (0.00,2.87) | 0.284             |
| clom-fluv-sert      | 1.102 | 0.650 | 1.695   | 0.090   | (0.00,2.38) | 0.000             |
| fluv-mirt-venl      | 1.037 | 0.749 | 1.385   | 0.166   | (0.00,2.50) | 0.126             |
| amit-fluv-venl      | 0.933 | 0.985 | 0.948   | 0.343   | (0.00,2.86) | 0.237             |
| cita-clom-mirt-paro | 0.899 | 0.826 | 1.088   | 0.277   | (0.00,2.52) | 0.105             |
| miln-paro-sert      | 0.872 | 0.939 | 0.928   | 0.353   | (0.00,2.71) | 0.000             |
| cita-clom-paro-rebo | 0.842 | 0.934 | 0.901   | 0.367   | (0.00,2.67) | 0.137             |
| cita-esci-venl      | 0.834 | 0.548 | 1.522   | 0.128   | (0.00,1.91) | 0.119             |
| cita-fluo-venl      | 0.806 | 0.430 | 1.876   | 0.061   | (0.00,1.65) | 0.039             |
| cita-clom-mirt-traz | 0.775 | 0.711 | 1.089   | 0.276   | (0.00,2.17) | 0.000             |
| fluo-fluv-sert      | 0.755 | 0.407 | 1.856   | 0.063   | (0.00,1.55) | 0.000             |
| fluo-sert-traz      | 0.750 | 0.525 | 1.430   | 0.153   | (0.00,1.78) | 0.014             |
| fluo-traz-venl      | 0.743 | 0.517 | 1.438   | 0.150   | (0.00,1.76) | 0.011             |
| cita-fluv-sert      | 0.736 | 0.928 | 0.793   | 0.428   | (0.00,2.55) | 0.213             |
| cita-fluo-mirt      | 0.735 | 0.462 | 1.591   | 0.112   | (0.00,1.64) | 0.014             |
| bupr-fluo-traz      | 0.734 | 0.996 | 0.737   | 0.461   | (0.00,2.69) | 0.215             |
| fluo-fluv-miln      | 0.719 | 0.432 | 1.665   | 0.096   | (0.00,1.57) | 0.010             |
| fluo-fluv-venl      | 0.718 | 0.494 | 1.453   | 0.146   | (0.00,1.69) | 0.000             |
| fluv-paro-sert      | 0.670 | 0.467 | 1.435   | 0.151   | (0.00,1.58) | 0.000             |
| amit-sert-traz      | 0.666 | 0.554 | 1.201   | 0.230   | (0.00,1.75) | 0.024             |
| amit-miln-sert      | 0.642 | 1.096 | 0.585   | 0.558   | (0.00,2.79) | 0.110             |
| clom-miln-sert      | 0.641 | 1.026 | 0.624   | 0.532   | (0.00,2.65) | 0.000             |
| amit-paro-venl      | 0.621 | 0.478 | 1.299   | 0.194   | (0.00,1.56) | 0.093             |
| clom-fluv-paro      | 0.616 | 0.733 | 0.840   | 0.401   | (0.00,2.05) | 0.086             |
| fluv-mirt-sert      | 0.615 | 0.799 | 0.769   | 0.442   | (0.00,2.18) | 0.225             |
| esci-paro-venl      | 0.608 | 0.469 | 1.297   | 0.195   | (0.00,1.53) | 0.066             |
| amit-traz-venl      | 0.594 | 0.566 | 1.050   | 0.294   | (0.00,1.70) | 0.000             |
| amit-fluv-miln      | 0.587 | 0.881 | 0.666   | 0.505   | (0.00,2.31) | 0.308             |
| bupr-paro-venl      | 0.582 | 0.447 | 1.303   | 0.193   | (0.00,1.46) | 0.000             |

|       |                     |       |       |       |       |             |       |
|-------|---------------------|-------|-------|-------|-------|-------------|-------|
|       | cita-fluo-rebo      | 0.575 | 0.383 | 1.499 | 0.134 | (0.00,1.33) | 0.000 |
|       | nefa-paro-sert      | 0.546 | 0.566 | 0.964 | 0.335 | (0.00,1.65) | 0.039 |
| cita- | esci-mirt-paro      | 0.538 | 0.523 | 1.029 | 0.304 | (0.00,1.56) | 0.047 |
|       | esci-sert-venl      | 0.537 | 0.543 | 0.990 | 0.322 | (0.00,1.60) | 0.074 |
|       | fluo-paro-traz      | 0.502 | 0.389 | 1.289 | 0.197 | (0.00,1.26) | 0.004 |
|       | cita-mirt-sert      | 0.487 | 1.388 | 0.351 | 0.726 | (0.00,3.21) | 0.463 |
|       | fluo-paro-venl      | 0.481 | 0.248 | 1.936 | 0.053 | (0.00,0.97) | 0.000 |
|       | fluo-nefa-sert      | 0.470 | 0.464 | 1.013 | 0.311 | (0.00,1.38) | 0.000 |
|       | cita-esci-sert      | 0.465 | 0.597 | 0.779 | 0.436 | (0.00,1.64) | 0.139 |
|       | amit-fluo-traz      | 0.456 | 0.424 | 1.076 | 0.282 | (0.00,1.29) | 0.000 |
|       | agom-esci-paro      | 0.450 | 0.307 | 1.467 | 0.142 | (0.00,1.05) | 0.000 |
|       | cita-clom-sert      | 0.448 | 0.886 | 0.506 | 0.613 | (0.00,2.18) | 0.159 |
|       | fluv-miln-paro      | 0.446 | 0.429 | 1.041 | 0.298 | (0.00,1.29) | 0.000 |
| amit- | clom-miln-traz      | 0.445 | 1.176 | 0.378 | 0.705 | (0.00,2.75) | 0.301 |
|       | cita-esci-paro-rebo | 0.435 | 0.466 | 0.932 | 0.351 | (0.00,1.35) | 0.031 |
| clom- | fluv-mirt-traz      | 0.407 | 1.157 | 0.352 | 0.725 | (0.00,2.67) | 0.265 |
|       | bupr-sert-venl      | 0.391 | 1.057 | 0.370 | 0.712 | (0.00,2.46) | 0.000 |
|       | esci-fluo-venl      | 0.386 | 0.303 | 1.272 | 0.203 | (0.00,0.98) | 0.000 |
| amit- | clom-miln-venl      | 0.383 | 0.841 | 0.455 | 0.649 | (0.00,2.03) | 0.122 |
| cita- | clom-esci-paro      | 0.377 | 0.584 | 0.645 | 0.519 | (0.00,1.52) | 0.069 |
|       | agom-fluo-venl      | 0.361 | 0.251 | 1.440 | 0.150 | (0.00,0.85) | 0.001 |
|       | cita-esci-fluo      | 0.358 | 0.316 | 1.134 | 0.257 | (0.00,0.98) | 0.012 |
|       | esci-fluo-paro      | 0.356 | 0.280 | 1.272 | 0.203 | (0.00,0.90) | 0.000 |
| amit- | clom-fluv-traz      | 0.356 | 1.096 | 0.325 | 0.745 | (0.00,2.50) | 0.220 |
|       | fluo-sert-venl      | 0.340 | 0.247 | 1.378 | 0.168 | (0.00,0.82) | 0.000 |
|       | dulo-paro-venl      | 0.337 | 0.436 | 0.774 | 0.439 | (0.00,1.19) | 0.058 |
|       | fluo-miln-paro      | 0.332 | 0.266 | 1.249 | 0.212 | (0.00,0.85) | 0.005 |
|       | dulo-esci-paro      | 0.321 | 0.364 | 0.883 | 0.377 | (0.00,1.03) | 0.038 |
|       | fluo-fluv-mirt      | 0.314 | 0.512 | 0.614 | 0.539 | (0.00,1.32) | 0.098 |
|       | cita-fluv-mirt      | 0.306 | 0.508 | 0.602 | 0.547 | (0.00,1.30) | 0.000 |
|       | amit-fluv-sert      | 0.303 | 0.572 | 0.529 | 0.597 | (0.00,1.42) | 0.098 |
|       | amit-paro-sert      | 0.296 | 0.359 | 0.827 | 0.408 | (0.00,1.00) | 0.067 |
|       | clom-sert-venl      | 0.293 | 0.429 | 0.684 | 0.494 | (0.00,1.13) | 0.000 |
|       | amit-fluo-venl      | 0.287 | 0.315 | 0.911 | 0.363 | (0.00,0.90) | 0.000 |
|       | esci-fluo-sert      | 0.278 | 0.368 | 0.757 | 0.449 | (0.00,1.00) | 0.000 |
|       | cita-fluo-sert      | 0.275 | 0.365 | 0.754 | 0.451 | (0.00,0.99) | 0.029 |
|       | amit-paro-traz      | 0.269 | 0.512 | 0.525 | 0.600 | (0.00,1.27) | 0.081 |
|       | clom-fluv-venl      | 0.262 | 0.727 | 0.360 | 0.719 | (0.00,1.69) | 0.000 |
| cita- | esci-fluv-paro      | 0.255 | 0.517 | 0.493 | 0.622 | (0.00,1.27) | 0.022 |
|       | amit-fluo-paro      | 0.247 | 0.231 | 1.068 | 0.286 | (0.00,0.70) | 0.020 |
|       | fluv-miln-sert      | 0.243 | 1.002 | 0.243 | 0.808 | (0.00,2.21) | 0.000 |
|       | fluo-rebo-venl      | 0.227 | 0.425 | 0.533 | 0.594 | (0.00,1.06) | 0.000 |
|       | clom-fluo-miln      | 0.219 | 0.492 | 0.444 | 0.657 | (0.00,1.18) | 0.000 |
|       | clom-fluv-miln      | 0.218 | 0.707 | 0.308 | 0.758 | (0.00,1.60) | 0.000 |
|       | fluo-mirt-paro      | 0.210 | 0.279 | 0.751 | 0.453 | (0.00,0.76) | 0.023 |
|       | bupr-paro-traz      | 0.185 | 0.558 | 0.332 | 0.740 | (0.00,1.28) | 0.000 |
| cita- | fluv-paro-rebo      | 0.181 | 0.526 | 0.345 | 0.730 | (0.00,1.21) | 0.000 |
| cita- | paro-rebo-sert      | 0.181 | 0.949 | 0.191 | 0.849 | (0.00,2.04) | 0.144 |
|       | clom-paro-sert      | 0.180 | 0.483 | 0.373 | 0.709 | (0.00,1.13) | 0.069 |
|       | bupr-traz-venl      | 0.175 | 0.592 | 0.296 | 0.767 | (0.00,1.34) | 0.000 |
|       | cita-fluo-fluv      | 0.169 | 0.417 | 0.405 | 0.685 | (0.00,0.99) | 0.000 |
|       | clom-fluo-venl      | 0.169 | 0.380 | 0.445 | 0.657 | (0.00,0.91) | 0.000 |
|       | fluo-paro-rebo      | 0.163 | 0.371 | 0.438 | 0.661 | (0.00,0.89) | 0.000 |
|       | bupr-fluo-venl      | 0.161 | 0.436 | 0.371 | 0.711 | (0.00,1.02) | 0.000 |
|       | clom-paro-venl      | 0.149 | 0.585 | 0.255 | 0.799 | (0.00,1.30) | 0.119 |
|       | mirt-paro-sert      | 0.127 | 0.456 | 0.278 | 0.781 | (0.00,1.02) | 0.049 |
|       | cita-mirt-venl      | 0.120 | 1.096 | 0.109 | 0.913 | (0.00,2.27) | 0.206 |
|       | esci-paro-sert      | 0.119 | 0.494 | 0.241 | 0.809 | (0.00,1.09) | 0.043 |
|       | fluo-mirt-traz      | 0.117 | 0.594 | 0.197 | 0.844 | (0.00,1.28) | 0.079 |
|       | bupr-fluo-sert      | 0.110 | 1.087 | 0.102 | 0.919 | (0.00,2.24) | 0.000 |
|       | cita-rebo-venl      | 0.107 | 0.485 | 0.221 | 0.825 | (0.00,1.06) | 0.000 |
|       | fluv-mirt-paro      | 0.099 | 0.566 | 0.175 | 0.861 | (0.00,1.21) | 0.121 |
|       | amit-sert-venl      | 0.094 | 0.358 | 0.261 | 0.794 | (0.00,0.80) | 0.000 |
|       | mirt-paro-traz      | 0.091 | 0.516 | 0.177 | 0.859 | (0.00,1.10) | 0.049 |
|       | fluo-mirt-venl      | 0.084 | 0.263 | 0.317 | 0.751 | (0.00,0.60) | 0.000 |
|       | fluo-mirt-sert      | 0.083 | 0.310 | 0.266 | 0.790 | (0.00,0.69) | 0.000 |
| cita- | mirt-paro-rebo      | 0.080 | 0.736 | 0.109 | 0.913 | (0.00,1.52) | 0.074 |
|       | agom-esci-venl      | 0.080 | 0.353 | 0.226 | 0.821 | (0.00,0.77) | 0.000 |
|       | clom-miln-paro      | 0.080 | 0.637 | 0.125 | 0.900 | (0.00,1.33) | 0.069 |
|       | dulo-esci-venl      | 0.075 | 0.299 | 0.249 | 0.803 | (0.00,0.66) | 0.000 |
|       | amit-fluv-paro      | 0.071 | 0.547 | 0.129 | 0.897 | (0.00,1.14) | 0.125 |
|       | amit-fluo-miln      | 0.069 | 0.426 | 0.162 | 0.871 | (0.00,0.90) | 0.037 |
|       | fluo-fluv-paro      | 0.062 | 0.404 | 0.153 | 0.878 | (0.00,0.85) | 0.000 |
|       | agom-dulo-paro      | 0.061 | 0.484 | 0.127 | 0.899 | (0.00,1.01) | 0.071 |
|       | bupr-fluo-paro      | 0.061 | 0.511 | 0.118 | 0.906 | (0.00,1.06) | 0.000 |
|       | agom-esci-fluo      | 0.054 | 0.327 | 0.166 | 0.868 | (0.00,0.69) | 0.000 |
|       | cita-clom-fluv      | 0.051 | 0.707 | 0.072 | 0.942 | (0.00,1.44) | 0.000 |

|                     |       |       |       |       |              |       |
|---------------------|-------|-------|-------|-------|--------------|-------|
| agom-fluo-paro      | 0.049 | 0.256 | 0.192 | 0.847 | (0.00, 0.55) | 0.012 |
| amit-fluv-mirt-traz | 0.045 | 1.124 | 0.040 | 0.968 | (0.00, 2.25) | 0.343 |
| amit-miln-paro      | 0.039 | 0.474 | 0.082 | 0.935 | (0.00, 0.97) | 0.091 |
| amit-fluo-fluv      | 0.038 | 0.362 | 0.104 | 0.917 | (0.00, 0.75) | 0.001 |
| fluo-nefa-paro      | 0.035 | 0.426 | 0.081 | 0.935 | (0.00, 0.87) | 0.000 |
| bupr-paro-sert      | 0.026 | 1.086 | 0.024 | 0.981 | (0.00, 2.16) | 0.000 |
| fluo-paro-sert      | 0.019 | 0.249 | 0.077 | 0.939 | (0.00, 0.51) | 0.000 |

### 8.3.1.2 Side-splitting

| Side      | Direct   |           | Indirect  |           | Difference |           |       |
|-----------|----------|-----------|-----------|-----------|------------|-----------|-------|
|           | Coef.    | Std. Err. | Coef.     | Std. Err. | Coef.      | Std. Err. | P> z  |
| agom dulo | .2747857 | .2521974  | -.1595808 | .1448596  | .4343666   | .2908399  | 0.135 |
| agom esci | .2054692 | .2408502  | .2012154  | .1296101  | -.4066846  | .2734618  | 0.137 |
| agom fluo | .1357624 | .1648437  | -.2062446 | .1277267  | .0704822   | .2083064  | 0.735 |
| agom paro | .1551196 | .1852912  | -.0805797 | .1215433  | .2356993   | .221775   | 0.288 |
| agom venl | .3075187 | .2167293  | .0777467  | .1179195  | -.3852654  | .2467538  | 0.118 |
| amit fluo | .0651015 | .1565131  | -.2752606 | .0972169  | .2101591   | .1842438  | 0.254 |
| amit fluv | .0808348 | .2454107  | -.2664355 | .1358457  | .1856008   | .2805513  | 0.508 |
| amit miln | .1623724 | .304638   | -.0946298 | .1371863  | -.0677427  | .3339434  | 0.839 |
| amit paro | .0742893 | .116934   | -.0240856 | .1085608  | -.0502037  | .1590613  | 0.752 |
| amit sert | .2467633 | .1722422  | -.0570727 | .1111317  | -.1896906  | .2049945  | 0.355 |
| amit traz | .3321745 | .3105124  | -.3472934 | .1565595  | .0151189   | .3475844  | 0.965 |
| amit venl | .1725341 | .2808635  | -.0327869 | .1010942  | -.1397471  | .2983635  | 0.640 |
| bupr fluo | .1733529 | .3950105  | -.3428694 | .1940512  | .1695165   | .4401013  | 0.700 |
| bupr paro | .0008167 | .3688016  | -.1811793 | .198299   | .1803626   | .4187328  | 0.667 |
| bupr sert | .0645379 | 1.026878  | -.2147268 | .1856432  | .2792648   | 1.043524  | 0.789 |
| bupr traz | .7396673 | .3970234  | -.338129  | .2279451  | -.4015383  | .4578063  | 0.380 |
| bupr venl | .1588537 | .2613484  | -.1287387 | .2311477  | -.030115   | .3489015  | 0.931 |
| cita clom | .566757  | .405286   | -.1276823 | .1379348  | .6944393   | .4281153  | 0.105 |
| cita esci | .3783393 | .138393   | .0653837  | .1462349  | .3129556   | .2014659  | 0.120 |
| cita fluo | .0363134 | .1954565  | -.0889415 | .1131575  | .1252548   | .2258606  | 0.579 |
| cita fluv | .1017411 | .3325821  | -.0566913 | .1447811  | -.0450497  | .3627292  | 0.901 |
| cita mirt | .2805174 | .3845445  | .2336776  | .1270722  | -.514195   | .4049961  | 0.204 |
| cita rebo | .5478923 | .2551439  | -.061945  | .1954906  | -.4859473  | .3214265  | 0.131 |
| cita sert | .0976222 | .2306307  | .0313835  | .1237106  | .0662387   | .2617504  | 0.800 |
| cita venl | .5232255 | .328357   | .1839263  | .1121416  | -.7071518  | .3478198  | 0.042 |
| clom fluo | .4955394 | .237831   | -.1203524 | .1159442  | .6158918   | .2645773  | 0.020 |
| clom fluv | .6174436 | .5273701  | .0385519  | .1443414  | -.6559955  | .5467663  | 0.230 |
| clom miln | .1397618 | .4214485  | .1060928  | .1501441  | .033669    | .4473947  | 0.940 |
| clom paro | .0880156 | .1431286  | .247075   | .1418997  | -.1590594  | .2014555  | 0.430 |
| clom sert | .0457217 | .2709229  | .1160337  | .1283141  | -.0703121  | .2997657  | 0.815 |
| clom traz | .4884265 | .4170583  | -.070085  | .1682902  | -.4183415  | .4499332  | 0.352 |
| clom venl | .4928066 | .3075177  | .1142274  | .1226623  | .3785792   | .3313251  | 0.253 |
| dulo esci | .3669248 | .199267   | .0520941  | .1457318  | .3148307   | .2468565  | 0.202 |
| dulo paro | .0309282 | .1846976  | .0836151  | .1375155  | -.1145433  | .2303862  | 0.619 |
| dulo venl | .1057734 | .1788444  | .0010995  | .1416467  | .1046739   | .2281406  | 0.646 |
| esci fluo | .0205539 | .2311082  | -.3449254 | .0999251  | .3654793   | .2517818  | 0.147 |
| esci paro | .0895839 | .1839402  | -.1280329 | .1076797  | .0384491   | .2130404  | 0.857 |
| esci sert | .0701931 | .3045527  | -.2187811 | .1131823  | .2889742   | .3250565  | 0.374 |
| esci venl | -.190284 | .2248258  | -.1034011 | .1078458  | -.0868829  | .2493693  | 0.728 |
| fluo fluv | .0316354 | .2641408  | -.0144651 | .1221473  | .0461005   | .291005   | 0.874 |
| fluo miln | .1548268 | .2169856  | .215453   | .1369002  | -.3702797  | .2569164  | 0.150 |
| fluo mirt | .4269079 | .1913256  | .1808898  | .1079203  | .2460181   | .2199582  | 0.263 |
| fluo nefa | .0352549 | .3287834  | .0511978  | .2311843  | -.0159429  | .4019553  | 0.968 |
| fluo paro | .2370718 | .124605   | .144114   | .0756787  | .0929579   | .1456865  | 0.523 |
| fluo rebo | .0121576 | .2920174  | -.2437954 | .1743634  | .2316377   | .34024    | 0.496 |
| fluo sert | .3510676 | .1330612  | -.0244881 | .096269   | .3755557   | .1642331  | 0.022 |
| fluo traz | .181445  | .2821071  | -.2135178 | .1481638  | .3949628   | .3186684  | 0.215 |
| fluo venl | .2068751 | .116299   | .1438903  | .0917313  | .0629848   | .1478048  | 0.670 |
| fluv miln | .5392037 | .2944311  | -.0063849 | .1583282  | .5455886   | .3343015  | 0.103 |
| fluv mirt | .1301778 | .2307367  | .2934699  | .1462627  | -.1632921  | .2731689  | 0.550 |
| fluv paro | .1317394 | .3224493  | .1814294  | .1190114  | -.04969    | .3438289  | 0.885 |
| fluv sert | .4419129 | .3211516  | .1988713  | .1289356  | -.6407842  | .3460867  | 0.064 |
| fluv venl | .8605795 | .4432719  | .1201468  | .1230326  | .7404327   | .4600292  | 0.107 |
| miln paro | .0481103 | .1658708  | .0678289  | .1531688  | -.0197186  | .2257712  | 0.930 |
| miln sert | -.735707 | .9252808  | .0078936  | .129881   | -.7436006  | .934352   | 0.426 |
| mirt paro | .0185567 | .1538993  | -.1228408 | .1166973  | .1413975   | .1931442  | 0.464 |
| mirt sert | .0262103 | .2719722  | -.1659296 | .1154465  | .1921398   | .2954603  | 0.515 |
| mirt traz | .4073069 | .3225476  | -.3578452 | .1625971  | -.0494616  | .3612129  | 0.891 |
| mirt venl | .3120889 | .2014071  | .0042085  | .1145826  | -.3162974  | .2317168  | 0.172 |
| nefa paro | .2623066 | .2916347  | .0227264  | .2478449  | .2395802   | .3822987  | 0.531 |
| nefa sert | .1541506 | .3489625  | .1505375  | .2306913  | -.3046881  | .418322   | 0.466 |

|            |          |          |           |          |           |          |       |
|------------|----------|----------|-----------|----------|-----------|----------|-------|
| paro rebo- | .4029367 | .2696105 | -.3275587 | .1830298 | -.0753779 | .3258677 | 0.817 |
| paro sert  | .1010077 | .2117524 | -.09617   | .0910794 | .1971777  | .230704  | 0.393 |
| paro traz- | .5463717 | .2755833 | -.2243151 | .1486195 | -.3220565 | .3131467 | 0.304 |
| paro venl  | .4529244 | .2261595 | -.0595068 | .0805538 | .5124312  | .2401329 | 0.033 |
| rebo venl- | .0436749 | .3426637 | .4494012  | .1709662 | -.4930762 | .3829462 | 0.198 |
| sert traz  | .5806286 | .4163348 | -.335826  | .1479145 | .9164546  | .4418295 | 0.038 |
| sert venl  | .1664371 | .2101924 | .0407784  | .1001232 | .1256587  | .2328428 | 0.589 |
| traz venl  | .7681215 | .4332836 | .2406392  | .1459659 | .5274823  | .4584009 | 0.250 |

### 8.3.1.3 Design-by-treatment test

$$\text{chi2}(60) = 61.50$$

$$\text{Prob} > \text{chi2} = 0.3182$$

## 8.3.2 Dropouts for any reason

### 8.3.2.1 Loop-specific approach

Loops With Evidence of Statistical Inconsistency:

| Loop                | IF    | seIF  | z_value | p_value | CI_95        | Loop_Heterog_tau2 |
|---------------------|-------|-------|---------|---------|--------------|-------------------|
| cita-clom-venl      | 2.706 | 1.055 | 2.566   | 0.010   | (0.64, 4.77) | 0.000             |
| cita-esci-venl      | 2.327 | 0.879 | 2.647   | 0.008   | (0.60, 4.05) | 0.000             |
| cita-fluo-venl      | 2.167 | 0.864 | 2.508   | 0.012   | (0.47, 3.86) | 0.001             |
| cita-clom-mirt-paro | 1.946 | 0.699 | 2.786   | 0.005   | (0.58, 3.32) | 0.000             |
| cita-clom-sert      | 1.534 | 0.652 | 2.354   | 0.019   | (0.26, 2.81) | 0.000             |
| agom-dulo-venl      | 1.312 | 0.392 | 3.349   | 0.001   | (0.54, 2.08) | 0.000             |
| cita-mirt-paro-rebo | 1.251 | 0.599 | 2.087   | 0.037   | (0.08, 2.43) | 0.000             |
| fluv-mirt-venl      | 1.180 | 0.539 | 2.190   | 0.029   | (0.12, 2.24) | 0.000             |
| agom-paro-venl      | 0.851 | 0.361 | 2.359   | 0.018   | (0.14, 1.56) | 0.000             |
| cita-fluo-sert      | 0.757 | 0.368 | 2.054   | 0.040   | (0.03, 1.48) | 0.008             |
| amit-fluo-paro      | 0.490 | 0.240 | 2.042   | 0.041   | (0.02, 0.96) | 0.000             |

Loops Without Evidence of Statistical Inconsistency:

| Loop                | IF    | seIF  | z_value | p_value | CI_95        | Loop_Heterog_tau2 |
|---------------------|-------|-------|---------|---------|--------------|-------------------|
| cita-sert-venl      | 1.365 | 1.167 | 1.170   | 0.242   | (0.00, 3.65) | 0.283             |
| fluo-sert-traz      | 1.173 | 0.839 | 1.398   | 0.162   | (0.00, 2.82) | 0.085             |
| amit-bupr-fluo      | 1.145 | 0.678 | 1.689   | 0.091   | (0.00, 2.47) | 0.000             |
| amit-fluv-sert      | 1.105 | 0.612 | 1.806   | 0.071   | (0.00, 2.30) | 0.029             |
| cita-fluo-mirt      | 1.020 | 0.528 | 1.931   | 0.054   | (0.00, 2.05) | 0.000             |
| agom-dulo-esci      | 1.002 | 0.724 | 1.384   | 0.166   | (0.00, 2.42) | 0.161             |
| cita-esci-mirt-paro | 0.981 | 0.557 | 1.763   | 0.078   | (0.00, 2.07) | 0.000             |
| cita-mirt-venl      | 0.981 | 0.960 | 1.022   | 0.307   | (0.00, 2.86) | 0.000             |
| amit-fluv-venl      | 0.981 | 0.676 | 1.450   | 0.147   | (0.00, 2.31) | 0.042             |
| cita-clom-esci-paro | 0.965 | 0.595 | 1.622   | 0.105   | (0.00, 2.13) | 0.000             |
| cita-fluv-sert      | 0.924 | 1.314 | 0.703   | 0.482   | (0.00, 3.50) | 0.484             |
| clom-fluo-fluv      | 0.902 | 0.909 | 0.992   | 0.321   | (0.00, 2.68) | 0.000             |
| amit-bupr-paro      | 0.885 | 0.735 | 1.205   | 0.228   | (0.00, 2.32) | 0.040             |
| cita-esci-sert      | 0.789 | 0.519 | 1.520   | 0.129   | (0.00, 1.81) | 0.043             |
| clom-fluv-paro      | 0.776 | 0.881 | 0.881   | 0.379   | (0.00, 2.50) | 0.000             |
| cita-clom-fluo      | 0.774 | 0.608 | 1.273   | 0.203   | (0.00, 1.97) | 0.000             |
| amit-sert-traz      | 0.741 | 0.728 | 1.018   | 0.309   | (0.00, 2.17) | 0.000             |
| amit-bupr-venl      | 0.735 | 0.637 | 1.153   | 0.249   | (0.00, 1.98) | 0.000             |
| fluo-nefa-sert      | 0.731 | 0.648 | 1.127   | 0.260   | (0.00, 2.00) | 0.029             |
| fluv-paro-sert      | 0.697 | 0.678 | 1.028   | 0.304   | (0.00, 2.03) | 0.033             |
| cita-clom-paro-rebo | 0.696 | 0.635 | 1.095   | 0.273   | (0.00, 1.94) | 0.000             |
| fluv-mirt-sert      | 0.696 | 0.851 | 0.818   | 0.413   | (0.00, 2.36) | 0.095             |
| bupr-fluo-traz      | 0.692 | 1.269 | 0.545   | 0.586   | (0.00, 3.18) | 0.379             |
| fluo-fluv-venl      | 0.679 | 0.564 | 1.203   | 0.229   | (0.00, 1.79) | 0.009             |

|                     |       |       |       |       |             |       |
|---------------------|-------|-------|-------|-------|-------------|-------|
| miln-paro-sert      | 0.675 | 0.614 | 1.100 | 0.271 | (0.00,1.88) | 0.000 |
| mirt-sert-traz      | 0.669 | 0.735 | 0.910 | 0.363 | (0.00,2.11) | 0.000 |
| bupr-paro-traz      | 0.656 | 0.610 | 1.076 | 0.282 | (0.00,1.85) | 0.000 |
| fluo-mirt-traz      | 0.647 | 0.634 | 1.020 | 0.308 | (0.00,1.89) | 0.092 |
| amit-mirt-traz-venl | 0.634 | 0.606 | 1.047 | 0.295 | (0.00,1.82) | 0.000 |
| mirt-paro-traz      | 0.634 | 0.535 | 1.186 | 0.236 | (0.00,1.68) | 0.027 |
| fluv-mirt-paro      | 0.614 | 0.431 | 1.423 | 0.155 | (0.00,1.46) | 0.000 |
| clom-fluv-sert      | 0.592 | 1.393 | 0.425 | 0.671 | (0.00,3.32) | 0.288 |
| fluo-nefa-paro      | 0.580 | 0.551 | 1.053 | 0.292 | (0.00,1.66) | 0.000 |
| mirt-paro-sert      | 0.573 | 0.376 | 1.525 | 0.127 | (0.00,1.31) | 0.000 |
| cita-paro-rebo-sert | 0.551 | 0.520 | 1.060 | 0.289 | (0.00,1.57) | 0.007 |
| amit-fluv-paro      | 0.549 | 0.469 | 1.170 | 0.242 | (0.00,1.47) | 0.038 |
| esci-fluo-paro      | 0.544 | 0.352 | 1.545 | 0.122 | (0.00,1.24) | 0.000 |
| amit-fluo-sert      | 0.544 | 0.296 | 1.837 | 0.066 | (0.00,1.12) | 0.000 |
| agom-esci-paro      | 0.542 | 0.407 | 1.333 | 0.183 | (0.00,1.34) | 0.000 |
| fluo-fluv-sert      | 0.534 | 0.675 | 0.792 | 0.428 | (0.00,1.86) | 0.057 |
| clom-paro-venl      | 0.525 | 0.482 | 1.088 | 0.277 | (0.00,1.47) | 0.000 |
| amit-fluv-miln      | 0.518 | 0.564 | 0.919 | 0.358 | (0.00,1.62) | 0.009 |
| amit-miln-sert      | 0.517 | 0.691 | 0.748 | 0.454 | (0.00,1.87) | 0.000 |
| bupr-sert-traz-venl | 0.497 | 1.304 | 0.382 | 0.703 | (0.00,3.05) | 0.330 |
| fluo-paro-rebo      | 0.487 | 0.403 | 1.210 | 0.226 | (0.00,1.28) | 0.000 |
| cita-fluo-rebo      | 0.449 | 0.437 | 1.028 | 0.304 | (0.00,1.30) | 0.000 |
| amit-fluv-mirt-traz | 0.431 | 0.593 | 0.727 | 0.467 | (0.00,1.59) | 0.000 |
| mirt-sert-venl      | 0.411 | 0.657 | 0.626 | 0.532 | (0.00,1.70) | 0.112 |
| clom-sert-venl      | 0.410 | 0.870 | 0.472 | 0.637 | (0.00,2.12) | 0.221 |
| agom-esci-venl      | 0.370 | 0.430 | 0.861 | 0.389 | (0.00,1.21) | 0.000 |
| esci-paro-sert      | 0.367 | 0.572 | 0.641 | 0.521 | (0.00,1.49) | 0.060 |
| esci-fluo-sert      | 0.363 | 0.523 | 0.693 | 0.488 | (0.00,1.39) | 0.063 |
| cita-fluv-mirt      | 0.353 | 0.600 | 0.589 | 0.556 | (0.00,1.53) | 0.000 |
| amit-bupr-traz      | 0.348 | 0.731 | 0.476 | 0.634 | (0.00,1.78) | 0.000 |
| amit-fluo-miln      | 0.344 | 0.451 | 0.763 | 0.445 | (0.00,1.23) | 0.000 |
| fluo-fluv-mirt      | 0.335 | 0.435 | 0.771 | 0.441 | (0.00,1.19) | 0.000 |
| cita-fluo-fluv      | 0.331 | 0.479 | 0.691 | 0.489 | (0.00,1.27) | 0.000 |
| fluo-paro-venl      | 0.331 | 0.273 | 1.212 | 0.226 | (0.00,0.87) | 0.000 |
| agom-fluo-venl      | 0.330 | 0.348 | 0.951 | 0.342 | (0.00,1.01) | 0.022 |
| agom-dulo-paro      | 0.329 | 0.354 | 0.929 | 0.353 | (0.00,1.02) | 0.000 |
| cita-esci-fluo      | 0.314 | 0.356 | 0.880 | 0.379 | (0.00,1.01) | 0.000 |
| fluo-miln-sert      | 0.311 | 0.620 | 0.501 | 0.616 | (0.00,1.53) | 0.006 |
| mirt-paro-venl      | 0.303 | 0.324 | 0.937 | 0.349 | (0.00,0.94) | 0.000 |
| clom-paro-sert      | 0.297 | 0.418 | 0.710 | 0.478 | (0.00,1.12) | 0.000 |
| amit-fluo-venl      | 0.289 | 0.367 | 0.787 | 0.431 | (0.00,1.01) | 0.000 |
| cita-fluv-paro-rebo | 0.284 | 0.587 | 0.483 | 0.629 | (0.00,1.43) | 0.000 |
| cita-esci-paro-rebo | 0.269 | 0.475 | 0.568 | 0.570 | (0.00,1.20) | 0.000 |
| fluv-sert-venl      | 0.249 | 1.253 | 0.199 | 0.842 | (0.00,2.71) | 0.444 |
| bupr-mirt-traz-venl | 0.248 | 0.569 | 0.435 | 0.664 | (0.00,1.36) | 0.000 |
| clom-fluo-venl      | 0.235 | 0.523 | 0.450 | 0.653 | (0.00,1.26) | 0.003 |
| fluo-paro-sert      | 0.215 | 0.292 | 0.736 | 0.461 | (0.00,0.79) | 0.000 |
| cita-clom-fluv      | 0.203 | 1.007 | 0.202 | 0.840 | (0.00,2.18) | 0.000 |
| bupr-fluo-paro      | 0.197 | 0.585 | 0.336 | 0.737 | (0.00,1.34) | 0.000 |
| dulo-esci-paro      | 0.195 | 0.567 | 0.344 | 0.731 | (0.00,1.31) | 0.128 |
| esci-sert-venl      | 0.195 | 0.726 | 0.269 | 0.788 | (0.00,1.62) | 0.197 |
| fluo-mirt-paro      | 0.193 | 0.289 | 0.667 | 0.505 | (0.00,0.76) | 0.000 |
| amit-paro-sert      | 0.185 | 0.310 | 0.597 | 0.551 | (0.00,0.79) | 0.000 |
| agom-fluo-paro      | 0.181 | 0.260 | 0.696 | 0.487 | (0.00,0.69) | 0.000 |
| agom-esci-fluo      | 0.180 | 0.439 | 0.410 | 0.682 | (0.00,1.04) | 0.021 |
| amit-paro-traz      | 0.178 | 0.537 | 0.332 | 0.740 | (0.00,1.23) | 0.042 |
| fluo-paro-traz      | 0.178 | 0.423 | 0.419 | 0.675 | (0.00,1.01) | 0.005 |
| fluo-fluv-miln      | 0.171 | 0.491 | 0.349 | 0.727 | (0.00,1.13) | 0.000 |
| fluo-mirt-venl      | 0.165 | 0.304 | 0.543 | 0.587 | (0.00,0.76) | 0.000 |
| amit-fluo-traz      | 0.159 | 0.494 | 0.323 | 0.747 | (0.00,1.13) | 0.000 |
| amit-sert-venl      | 0.158 | 0.455 | 0.348 | 0.728 | (0.00,1.05) | 0.020 |
| esci-fluo-venl      | 0.145 | 0.376 | 0.386 | 0.700 | (0.00,0.88) | 0.017 |
| fluo-mirt-sert      | 0.141 | 0.380 | 0.371 | 0.711 | (0.00,0.89) | 0.005 |
| amit-paro-venl      | 0.139 | 0.408 | 0.340 | 0.734 | (0.00,0.94) | 0.011 |
| cita-mirt-sert      | 0.137 | 0.572 | 0.239 | 0.811 | (0.00,1.26) | 0.000 |
| dulo-paro-venl      | 0.132 | 0.324 | 0.409 | 0.683 | (0.00,0.77) | 0.000 |
| fluo-miln-paro      | 0.120 | 0.280 | 0.427 | 0.669 | (0.00,0.67) | 0.000 |
| bupr-fluo-venl      | 0.113 | 0.519 | 0.217 | 0.828 | (0.00,1.13) | 0.017 |
| nefa-paro-sert      | 0.103 | 0.517 | 0.199 | 0.842 | (0.00,1.12) | 0.000 |
| fluo-sert-venl      | 0.092 | 0.377 | 0.245 | 0.807 | (0.00,0.83) | 0.056 |
| fluo-fluv-paro      | 0.086 | 0.452 | 0.190 | 0.849 | (0.00,0.97) | 0.000 |
| esci-paro-venl      | 0.061 | 0.386 | 0.159 | 0.874 | (0.00,0.82) | 0.000 |
| fluv-miln-sert      | 0.056 | 1.119 | 0.050 | 0.960 | (0.00,2.25) | 0.183 |
| clom-fluo-paro      | 0.040 | 0.332 | 0.119 | 0.905 | (0.00,0.69) | 0.000 |
| fluv-miln-paro      | 0.034 | 0.489 | 0.071 | 0.944 | (0.00,0.99) | 0.000 |
| dulo-esci-venl      | 0.025 | 0.477 | 0.053 | 0.958 | (0.00,0.96) | 0.068 |
| clom-fluo-sert      | 0.018 | 0.465 | 0.039 | 0.969 | (0.00,0.93) | 0.000 |

|                     |       |       |       |       |             |       |
|---------------------|-------|-------|-------|-------|-------------|-------|
| cita-esci-fluv-paro | 0.014 | 0.543 | 0.026 | 0.979 | (0.00,1.08) | 0.000 |
| bupr-paro-venl      | 0.012 | 0.506 | 0.025 | 0.980 | (0.00,1.00) | 0.000 |
| clom-fluv-venl      | 0.011 | 1.014 | 0.011 | 0.991 | (0.00,2.00) | 0.000 |
| amit-miln-paro      | 0.010 | 0.445 | 0.022 | 0.983 | (0.00,0.88) | 0.019 |
| amit-fluo-fluv      | 0.008 | 0.410 | 0.021 | 0.984 | (0.00,0.81) | 0.000 |

### 8.3.2.2 Side-splitting

| Side       | Direct   |           | Indirect  |           | Difference |           |       |
|------------|----------|-----------|-----------|-----------|------------|-----------|-------|
|            | Coef.    | Std. Err. | Coef.     | Std. Err. | Coef.      | Std. Err. | P> z  |
| agom dulo- | .1481216 | .2591986  | .6396765  | .1443544  | -.7877981  | .2966852  | 0.008 |
| agom esci  | .2397861 | .2919887  | -.0200878 | .1419339  | .2598739   | .324622   | 0.423 |
| agom fluo  | .2563222 | .1640613  | .0867768  | .1358545  | .1695453   | .2117746  | 0.423 |
| agom paro  | .0186653 | .1840965  | .2930637  | .1290091  | -.2743984  | .2248431  | 0.222 |
| agom venl  | .718039  | .2363567  | .1717818  | .1222956  | .5462572   | .266145   | 0.040 |
| amit bupr  | .5764195 | .5237737  | -.1900441 | .1851085  | .7664636   | .5555215  | 0.168 |
| amit fluo- | .4283316 | .171572   | -.053039  | .1028903  | -.3752926  | .2000564  | 0.061 |
| amit fluv- | .2776619 | .2342912  | .1743344  | .1498418  | -.4519962  | .2781556  | 0.104 |
| amit miln- | .0183109 | .3718603  | -.0952345 | .1431375  | .0769236   | .3983168  | 0.847 |
| amit paro  | .0086852 | .1215845  | -.2061398 | .115156   | .214825    | .1671171  | 0.199 |
| amit sert- | .0302221 | .1971315  | -.2149731 | .1233489  | .1847511   | .232623   | 0.427 |
| amit traz  | .1442308 | .3686544  | -.0081396 | .1747364  | .1523704   | .4078954  | 0.709 |
| amit venl- | .0079104 | .30938    | -.0192096 | .1084152  | .0112993   | .3279154  | 0.973 |
| bupr fluo  | .1402558 | .4130355  | -.0847723 | .1817897  | .2250281   | .4512713  | 0.618 |
| bupr paro  | .2883554 | .4142058  | -.0559859 | .1827296  | .3443413   | .4527212  | 0.447 |
| bupr traz- | .0800426 | .3760925  | .2038381  | .2334629  | -.2838807  | .442663   | 0.521 |
| bupr venl  | .1485547 | .2342833  | .0276953  | .229131   | .1208594   | .3277036  | 0.712 |
| cita clom- | .4906219 | .5060083  | .5239905  | .1571142  | -1.014612  | .5298389  | 0.05  |
| cita esci- | .2911876 | .1881383  | .0617449  | .1674529  | -.3529325  | .2519925  | 0.161 |
| cita fluo- | .1420769 | .2047063  | .1079371  | .1357768  | -.250014   | .2456676  | 0.309 |
| cita fluv  | .3485738 | .3337713  | .1992701  | .1665542  | .1493037   | .3730196  | 0.689 |
| cita mirt  | .8601197 | .4494768  | .0046426  | .1424429  | .8554771   | .4715075  | 0.070 |
| cita rebo  | .4728521 | .2815487  | .5138439  | .2320413  | -.0409918  | .3648463  | 0.911 |
| cita sert  | .4715263 | .2515499  | -.1245576 | .1430265  | .5960839   | .2891466  | 0.039 |
| cita venl  | 2.154643 | .8337837  | .1213496  | .1259603  | 2.033294   | .8432443  | 0.016 |
| clom fluo- | .4233596 | .2904297  | -.395739  | .1344692  | -.0276206  | .3199491  | 0.931 |
| clom fluv  | .6359839 | .8155056  | -.237897  | .160877   | .8738809   | .8312225  | 0.293 |
| clom paro- | .4316628 | .1363726  | -.2031864 | .1891448  | -.2284764  | .233158   | 0.327 |
| clom sert- | .5923985 | .3437739  | -.3776454 | .146842   | -.2147531  | .3742026  | 0.566 |
| clom venl- | .0606247 | .4228216  | -.2869998 | .1366108  | .2263751   | .4443429  | 0.610 |
| dulo esci- | .5764256 | .2120457  | -.3435293 | .1584891  | -.2328963  | .2647957  | 0.379 |
| dulo paro  | -.153148 | .1797998  | -.320009  | .1468818  | .1668609   | .2322052  | 0.472 |
| dulo venl- | .4471851 | .1833211  | .0027329  | .1427816  | -.449918   | .2324948  | 0.053 |
| esci fluo- | .1682946 | .2406889  | .1919826  | .114824   | -.3602772  | .2664812  | 0.176 |
| esci paro  | .318897  | .2410639  | .1394872  | .1171341  | .1794098   | .2682203  | 0.504 |
| esci sert  | .0617732 | .3284748  | .1245345  | .129822   | -.0627614  | .3531738  | 0.859 |
| esci venl  | .1086348 | .2310139  | .3058658  | .1250286  | -.1972309  | .2627265  | 0.453 |
| fluo fluv  | .1544566 | .3028321  | .2055013  | .1327658  | -.0510447  | .3309703  | 0.877 |
| fluo miln  | .0739673 | .2128905  | .0652938  | .1498162  | .0086735   | .2603505  | 0.973 |
| fluo mirt- | .0214108 | .2146199  | .0732734  | .1138881  | -.0946842  | .2431691  | 0.697 |
| fluo nefa  | .5678896 | .453223   | .0419022  | .2435346  | .5259874   | .5144989  | 0.307 |
| fluo paro- | .0520726 | .1252834  | .0901345  | .0810986  | -.1422071  | .149332   | 0.341 |
| fluo rebo  | .1648873 | .2907283  | .619195   | .2061443  | -.4543077  | .3563983  | 0.202 |
| fluo sert- | .1503814 | .1554658  | .0598886  | .1091688  | -.2102701  | .1900234  | 0.268 |
| fluo traz  | .419724  | .2922967  | .0855953  | .174006   | .3341287   | .3401738  | 0.326 |
| fluo venl  | .1256649 | .1262349  | .1417501  | .1008705  | -.0160852  | .1618434  | 0.921 |
| fluv miln- | .2603573 | .3419958  | -.096468  | .1703102  | -.1638893  | .3820285  | 0.668 |
| fluv mirt  | .1584327 | .2483018  | -.2661683 | .1576238  | .424601    | .294111   | 0.149 |
| fluv paro- | .2929141 | .3263337  | -.1260715 | .1300402  | -.1668426  | .3512849  | 0.635 |
| fluv sert  | -.879688 | .468195   | -.1455606 | .1392814  | -.7341274  | .488769   | 0.133 |
| fluv venl- | .7075936 | .4501581  | -.0024729 | .1350686  | -.7051207  | .4699849  | 0.134 |
| miln paro  | .0063752 | .1684073  | -.0469917 | .1689909  | .0533669   | .2389022  | 0.823 |
| miln sert- | .5332983 | .560766   | -.0481639 | .1426691  | -.4851344  | .5786303  | 0.402 |
| mirt paro  | .1618315 | .1636529  | -.0966993 | .1226802  | .2585307   | .2044442  | 0.206 |
| mirt sert  | -.269815 | .2775062  | -.0184461 | .1272447  | -.2513688  | .3052882  | 0.410 |
| mirt traz- | .1623425 | .3394146  | .2038089  | .1838224  | -.3661514  | .3859961  | 0.343 |
| mirt venl  | .3138311 | .1931975  | -.0128804 | .1251598  | .3267116   | .2301958  | 0.156 |
| nefa paro- | .0409628 | .3020986  | -.1822794 | .2994612  | .1413166   | .425062   | 0.740 |
| nefa sert  | .0016963 | .3786828  | -.2552128 | .2669577  | .256909    | .4633218  | 0.579 |
| paro rebo  | .7006942 | .2684461  | .2355098  | .2167271  | .4651845   | .345013   | 0.178 |
| paro sert  | .1390516 | .2221847  | -.0980123 | .1004749  | .2370639   | .2438279  | 0.331 |
| paro traz  | .2945897 | .2838392  | .060267   | .1755716  | .2343226   | .3333859  | 0.482 |

```

paro venl-.1506307 .2223719 .124587 .0881634 -.2752177 .239216 0.250
sert traz-.5618102 .6071661 .2399672 .1688958 -.8017774 .6302194 0.203
sert venl .1844182 .2408344 .1367055 .1118982 .0477128 .2655927 0.857

```

### 8.3.2.3 Design-by-treatment test

$\chi^2(57) = 70.47$

Prob >  $\chi^2 = 0.0544$

## 8.3.3 Efficacy continuous

### 8.3.3.1 Loop-specific approach

Loops With Evidence of Statistical Inconsistency:

| Loop                | IF    | seIF  | z_value | p_value | CI_95       | Loop_Heterog_tau2 |
|---------------------|-------|-------|---------|---------|-------------|-------------------|
| clom-fluo-miln      | 1.015 | 0.284 | 3.570   | 0.000   | (0.46,1.57) | 0.000             |
| amit-clom-miln-sert | 0.837 | 0.298 | 2.807   | 0.005   | (0.25,1.42) | 0.000             |
| clom-fluv-miln      | 0.724 | 0.337 | 2.151   | 0.031   | (0.06,1.38) | 0.000             |
| cita-clom-fluo      | 0.590 | 0.257 | 2.293   | 0.022   | (0.09,1.09) | 0.000             |
| agom-dulo-esci      | 0.530 | 0.161 | 3.282   | 0.001   | (0.21,0.85) | 0.000             |
| agom-dulo-venl      | 0.357 | 0.147 | 2.424   | 0.015   | (0.07,0.65) | 0.000             |

Loops Without Evidence of Statistical Inconsistency:

| Loop                | IF    | seIF  | z_value | p_value | CI_95       | Loop_Heterog_tau2 |
|---------------------|-------|-------|---------|---------|-------------|-------------------|
| amit-clom-miln-venl | 0.876 | 0.545 | 1.608   | 0.108   | (0.00,1.94) | 0.053             |
| clom-miln-paro      | 0.609 | 0.415 | 1.468   | 0.142   | (0.00,1.42) | 0.038             |
| cita-clom-venl      | 0.579 | 0.329 | 1.757   | 0.079   | (0.00,1.22) | 0.000             |
| cita-clom-sert      | 0.503 | 0.336 | 1.496   | 0.135   | (0.00,1.16) | 0.017             |
| clom-fluv-sert      | 0.436 | 0.296 | 1.473   | 0.141   | (0.00,1.02) | 0.000             |
| clom-fluo-fluv      | 0.435 | 0.289 | 1.504   | 0.133   | (0.00,1.00) | 0.000             |
| cita-clom-fluv      | 0.403 | 0.328 | 1.229   | 0.219   | (0.00,1.05) | 0.000             |
| cita-clom-paro-rebo | 0.380 | 0.611 | 0.622   | 0.534   | (0.00,1.58) | 0.070             |
| fluv-sert-venl      | 0.369 | 0.370 | 0.999   | 0.318   | (0.00,1.09) | 0.018             |
| cita-clom-mirt-paro | 0.365 | 0.562 | 0.649   | 0.516   | (0.00,1.47) | 0.082             |
| cita-fluv-sert      | 0.338 | 0.330 | 1.025   | 0.305   | (0.00,0.99) | 0.023             |
| bupr-sert-traz      | 0.321 | 0.569 | 0.564   | 0.573   | (0.00,1.44) | 0.000             |
| dulo-esci-paro      | 0.315 | 0.173 | 1.824   | 0.068   | (0.00,0.65) | 0.008             |
| agom-esci-paro      | 0.305 | 0.202 | 1.513   | 0.130   | (0.00,0.70) | 0.013             |
| cita-esci-fluv-paro | 0.303 | 0.257 | 1.180   | 0.238   | (0.00,0.81) | 0.006             |
| agom-paro-venl      | 0.297 | 0.197 | 1.512   | 0.131   | (0.00,0.68) | 0.007             |
| amit-fluv-venl      | 0.290 | 0.316 | 0.918   | 0.359   | (0.00,0.91) | 0.000             |
| amit-fluv-miln      | 0.284 | 0.379 | 0.749   | 0.454   | (0.00,1.03) | 0.040             |
| clom-fluo-paro      | 0.274 | 0.204 | 1.344   | 0.179   | (0.00,0.67) | 0.017             |
| cita-fluo-rebo      | 0.273 | 0.189 | 1.442   | 0.149   | (0.00,0.64) | 0.000             |
| bupr-fluo-sert      | 0.260 | 0.541 | 0.481   | 0.631   | (0.00,1.32) | 0.000             |
| amit-paro-traz      | 0.260 | 0.338 | 0.768   | 0.442   | (0.00,0.92) | 0.016             |
| cita-fluo-fluv      | 0.247 | 0.200 | 1.238   | 0.216   | (0.00,0.64) | 0.000             |
| fluv-miln-paro      | 0.245 | 0.222 | 1.102   | 0.270   | (0.00,0.68) | 0.000             |
| cita-clom-esci-paro | 0.231 | 0.338 | 0.685   | 0.493   | (0.00,0.89) | 0.026             |
| amit-bupr-traz-venl | 0.230 | 0.355 | 0.647   | 0.518   | (0.00,0.93) | 0.000             |
| cita-esci-fluo      | 0.224 | 0.137 | 1.630   | 0.103   | (0.00,0.49) | 0.000             |
| fluo-paro-rebo      | 0.205 | 0.180 | 1.134   | 0.257   | (0.00,0.56) | 0.000             |
| fluo-fluv-venl      | 0.200 | 0.298 | 0.672   | 0.502   | (0.00,0.78) | 0.004             |
| bupr-fluo-venl      | 0.194 | 0.249 | 0.780   | 0.435   | (0.00,0.68) | 0.006             |
| bupr-fluo-paro      | 0.186 | 0.259 | 0.715   | 0.475   | (0.00,0.69) | 0.000             |
| cita-fluo-mirt      | 0.175 | 0.225 | 0.778   | 0.437   | (0.00,0.62) | 0.012             |
| cita-esci-venl      | 0.171 | 0.214 | 0.796   | 0.426   | (0.00,0.59) | 0.005             |



|                     |       |       |       |       |             |       |
|---------------------|-------|-------|-------|-------|-------------|-------|
| amit-fluo-traz      | 0.167 | 0.409 | 0.407 | 0.684 | (0.00,0.97) | 0.030 |
| cita-esci-mirt-paro | 0.166 | 0.297 | 0.560 | 0.576 | (0.00,0.75) | 0.029 |
| clom-paro-sert      | 0.166 | 0.310 | 0.535 | 0.593 | (0.00,0.77) | 0.040 |
| fluo-fluv-sert      | 0.157 | 0.205 | 0.766 | 0.444 | (0.00,0.56) | 0.000 |
| clom-fluo-sert      | 0.156 | 0.199 | 0.785 | 0.432 | (0.00,0.55) | 0.000 |
| cita-fluv-paro-rebo | 0.154 | 0.265 | 0.581 | 0.561 | (0.00,0.67) | 0.000 |
| esci-fluo-venl      | 0.151 | 0.166 | 0.913 | 0.361 | (0.00,0.48) | 0.006 |
| cita-esci-paro-rebo | 0.148 | 0.235 | 0.630 | 0.529 | (0.00,0.61) | 0.008 |
| esci-fluo-paro      | 0.148 | 0.143 | 1.030 | 0.303 | (0.00,0.43) | 0.003 |
| fluo-paro-traz      | 0.147 | 0.226 | 0.648 | 0.517 | (0.00,0.59) | 0.005 |
| fluo-sert-traz      | 0.146 | 0.270 | 0.540 | 0.589 | (0.00,0.67) | 0.002 |
| fluo-fluv-miln      | 0.144 | 0.221 | 0.652 | 0.514 | (0.00,0.58) | 0.000 |
| esci-fluo-sert      | 0.141 | 0.159 | 0.890 | 0.374 | (0.00,0.45) | 0.000 |
| cita-esci-sert      | 0.138 | 0.184 | 0.753 | 0.452 | (0.00,0.50) | 0.009 |
| clom-fluv-paro      | 0.138 | 0.394 | 0.350 | 0.727 | (0.00,0.91) | 0.049 |
| fluo-rebo-venl      | 0.137 | 0.227 | 0.605 | 0.545 | (0.00,0.58) | 0.005 |
| clom-fluv-venl      | 0.131 | 0.394 | 0.332 | 0.740 | (0.00,0.90) | 0.000 |
| fluv-paro-sert      | 0.130 | 0.238 | 0.547 | 0.585 | (0.00,0.60) | 0.000 |
| dulo-paro-venl      | 0.126 | 0.151 | 0.838 | 0.402 | (0.00,0.42) | 0.000 |
| bupr-paro-sert      | 0.126 | 0.540 | 0.233 | 0.816 | (0.00,1.18) | 0.000 |
| fluo-miln-paro      | 0.125 | 0.150 | 0.833 | 0.405 | (0.00,0.42) | 0.000 |
| amit-paro-venl      | 0.116 | 0.260 | 0.448 | 0.654 | (0.00,0.63) | 0.019 |
| fluo-paro-venl      | 0.116 | 0.138 | 0.834 | 0.404 | (0.00,0.39) | 0.002 |
| agom-fluo-paro      | 0.112 | 0.123 | 0.911 | 0.362 | (0.00,0.35) | 0.003 |
| agom-esci-venl      | 0.108 | 0.177 | 0.610 | 0.542 | (0.00,0.46) | 0.005 |
| fluo-mirt-venl      | 0.106 | 0.168 | 0.632 | 0.527 | (0.00,0.44) | 0.010 |
| fluv-mirt-venl      | 0.106 | 0.351 | 0.301 | 0.763 | (0.00,0.79) | 0.019 |
| amit-fluv-paro      | 0.105 | 0.285 | 0.369 | 0.712 | (0.00,0.66) | 0.016 |
| fluo-mirt-paro      | 0.103 | 0.188 | 0.547 | 0.584 | (0.00,0.47) | 0.025 |
| cita-fluv-mirt      | 0.102 | 0.208 | 0.490 | 0.624 | (0.00,0.51) | 0.000 |
| mirt-paro-venl      | 0.097 | 0.405 | 0.240 | 0.811 | (0.00,0.89) | 0.068 |
| clom-fluo-venl      | 0.092 | 0.257 | 0.359 | 0.720 | (0.00,0.60) | 0.002 |
| cita-fluo-venl      | 0.092 | 0.209 | 0.441 | 0.659 | (0.00,0.50) | 0.005 |
| bupr-paro-venl      | 0.092 | 0.234 | 0.392 | 0.695 | (0.00,0.55) | 0.000 |
| agom-fluo-venl      | 0.084 | 0.144 | 0.581 | 0.561 | (0.00,0.37) | 0.007 |
| amit-fluo-fluv      | 0.079 | 0.221 | 0.358 | 0.720 | (0.00,0.51) | 0.004 |
| agom-dulo-paro      | 0.078 | 0.186 | 0.420 | 0.675 | (0.00,0.44) | 0.007 |
| dulo-esci-venl      | 0.078 | 0.145 | 0.540 | 0.589 | (0.00,0.36) | 0.000 |
| bupr-fluo-traz      | 0.077 | 0.314 | 0.247 | 0.805 | (0.00,0.69) | 0.000 |
| fluo-nefa-paro      | 0.074 | 0.213 | 0.350 | 0.726 | (0.00,0.49) | 0.000 |
| amit-fluo-miln      | 0.074 | 0.288 | 0.257 | 0.797 | (0.00,0.64) | 0.023 |
| fluv-mirt-paro      | 0.072 | 0.357 | 0.202 | 0.840 | (0.00,0.77) | 0.065 |
| clom-paro-venl      | 0.071 | 0.519 | 0.137 | 0.891 | (0.00,1.09) | 0.070 |
| amit-fluo-sert      | 0.070 | 0.132 | 0.533 | 0.594 | (0.00,0.33) | 0.000 |
| amit-sert-venl      | 0.066 | 0.190 | 0.349 | 0.727 | (0.00,0.44) | 0.001 |
| nefa-paro-sert      | 0.064 | 0.229 | 0.278 | 0.781 | (0.00,0.51) | 0.000 |
| bupr-paro-traz      | 0.058 | 0.281 | 0.205 | 0.838 | (0.00,0.61) | 0.000 |
| amit-miln-paro      | 0.058 | 0.236 | 0.244 | 0.807 | (0.00,0.52) | 0.017 |
| cita-fluo-sert      | 0.057 | 0.133 | 0.428 | 0.669 | (0.00,0.32) | 0.000 |
| bupr-sert-venl      | 0.052 | 0.528 | 0.099 | 0.921 | (0.00,1.09) | 0.000 |
| fluo-fluv-mirt      | 0.047 | 0.238 | 0.197 | 0.844 | (0.00,0.51) | 0.018 |
| esci-paro-sert      | 0.046 | 0.193 | 0.238 | 0.812 | (0.00,0.43) | 0.009 |
| cita-fluv-venl      | 0.045 | 0.332 | 0.136 | 0.892 | (0.00,0.70) | 0.000 |
| fluo-paro-sert      | 0.043 | 0.124 | 0.351 | 0.725 | (0.00,0.29) | 0.000 |
| cita-paro-rebo-sert | 0.042 | 0.343 | 0.122 | 0.903 | (0.00,0.71) | 0.018 |
| agom-esci-fluo      | 0.041 | 0.162 | 0.254 | 0.799 | (0.00,0.36) | 0.003 |
| fluo-nefa-sert      | 0.040 | 0.240 | 0.169 | 0.866 | (0.00,0.51) | 0.000 |
| cita-mirt-venl      | 0.040 | 0.224 | 0.180 | 0.857 | (0.00,0.48) | 0.000 |
| cita-rebo-venl      | 0.039 | 0.252 | 0.153 | 0.878 | (0.00,0.53) | 0.000 |
| amit-sert-traz      | 0.028 | 0.321 | 0.088 | 0.930 | (0.00,0.66) | 0.000 |
| amit-fluo-venl      | 0.025 | 0.173 | 0.144 | 0.885 | (0.00,0.37) | 0.007 |
| fluo-fluv-paro      | 0.024 | 0.211 | 0.116 | 0.908 | (0.00,0.44) | 0.000 |
| cita-mirt-paro-rebo | 0.022 | 0.624 | 0.036 | 0.972 | (0.00,1.24) | 0.099 |
| amit-paro-sert      | 0.021 | 0.162 | 0.129 | 0.897 | (0.00,0.34) | 0.008 |
| amit-fluv-sert      | 0.010 | 0.224 | 0.047 | 0.963 | (0.00,0.45) | 0.000 |
| cita-mirt-paro-sert | 0.009 | 0.434 | 0.020 | 0.984 | (0.00,0.86) | 0.056 |
| amit-fluo-paro      | 0.004 | 0.124 | 0.036 | 0.972 | (0.00,0.25) | 0.008 |
| fluo-sert-venl      | 0.004 | 0.143 | 0.029 | 0.977 | (0.00,0.28) | 0.001 |
| esci-sert-venl      | 0.003 | 0.231 | 0.012 | 0.990 | (0.00,0.45) | 0.014 |

### 8.3.3.2 Side-splitting

| Side       | Direct   |           | Indirect  |           | Difference |           |       |
|------------|----------|-----------|-----------|-----------|------------|-----------|-------|
|            | Coef.    | Std. Err. | Coef.     | Std. Err. | Coef.      | Std. Err. | P> z  |
| agom dulo- | .2372621 | .1246922  | -.004516  | .0723209  | -.2327461  | .1441474  | 0.106 |
| agom esci  | .1064611 | .1096172  | -.1554867 | .0623718  | .2619478   | .1260936  | 0.038 |
| agom fluo  | .0646071 | .0831887  | .0763364  | .0619722  | -.0117294  | .103677   | 0.910 |
| agom paro- | .1564327 | .0925606  | .0060971  | .0591666  | -.1625298  | .1099062  | 0.139 |
| agom venl  | .0617733 | .0982373  | -.0648789 | .0603852  | .1266522   | .115314   | 0.272 |
| amit fluo  | .1707998 | .08211    | .1722394  | .0530301  | -.0014395  | .0977522  | 0.988 |
| amit fluv- | .0219119 | .1619977  | .1455029  | .0700747  | -.1674148  | .1765041  | 0.343 |
| amit miln  | .0902417 | .1542771  | .1168112  | .0765152  | -.0265695  | .1722542  | 0.877 |
| amit paro  | .0692971 | .0621417  | .0503619  | .0583015  | .0189352   | .0852328  | 0.824 |
| amit sert  | .1601147 | .0944628  | .1115442  | .0603864  | .0485704   | .1121158  | 0.665 |
| amit traz  | .0020891 | .2622183  | .1659     | .0938482  | -.1638109  | .2785065  | 0.556 |
| amit venl  | .1070927 | .1354572  | .0637587  | .0545633  | .0433339   | .1460585  | 0.767 |
| bupr fluo  | .2774453 | .2004499  | .1032407  | .1014366  | .1742046   | .2246542  | 0.438 |
| bupr paro- | .0140928 | .1915195  | .0380372  | .1034224  | -.05213    | .2176601  | 0.811 |
| bupr sert- | .0629924 | .5102624  | .0982792  | .0973715  | -.1612716  | .5194698  | 0.756 |
| bupr traz  | .1271642 | .2064127  | .1091969  | .1304603  | .0179673   | .2441845  | 0.941 |
| bupr venl- | .0013175 | .1368964  | .0663124  | .1202997  | -.0676299  | .1822433  | 0.711 |
| cita clom- | .3747901 | .2140697  | -.0049093 | .0708785  | -.3698808  | .2254985  | 0.101 |
| cita esci- | .1688673 | .0615004  | -.0087766 | .0715224  | -.1600908  | .0943031  | 0.090 |
| cita fluo  | .0540477 | .0990789  | .06396    | .0545127  | -.0099124  | .113088   | 0.930 |
| cita fluv  | .1855169 | .1567446  | -.0290573 | .0727418  | .2145742   | .1728012  | 0.214 |
| cita mirt  | .0202473 | .1455782  | -.1002115 | .0687101  | .1204587   | .1609785  | 0.454 |
| cita rebo  | .2558838 | .1372913  | .085245   | .0978406  | .1706387   | .1685873  | 0.311 |
| cita sert  | .0320441 | .1003025  | .0087544  | .0633933  | .0232897   | .1186685  | 0.844 |
| cita venl  | .0658868 | .1827417  | -.0498076 | .0544945  | .1156944   | .1906939  | 0.544 |
| clom fluo- | .1599586 | .1496697  | .1510045  | .0643846  | -.3109631  | .1629168  | 0.056 |
| clom fluv  | .1574928 | .2281729  | .0383311  | .0783087  | .1191617   | .2412369  | 0.621 |
| clom miln  | .688798  | .2257066  | -.0406472 | .0805896  | .7294452   | .2396626  | 0.002 |
| clom paro- | .0048725 | .0757833  | -.0132244 | .0809899  | .0083519   | .1108997  | 0.940 |
| clom sert  | -.086769 | .1376204  | .0958134  | .0712522  | -.1825824  | .1550196  | 0.239 |
| clom venl- | .1378385 | .2185344  | .0142365  | .0656801  | -.152075   | .228191   | 0.505 |
| dulo esci- | .1926235 | .1003116  | .0546759  | .0711967  | -.2472994  | .1230103  | 0.044 |
| dulo paro  | .1576163 | .0918776  | -.0540704 | .0687091  | .2116868   | .1147619  | 0.065 |
| dulo venl- | .0580184 | .0909714  | .0879704  | .07111    | -.1459888  | .1154285  | 0.206 |
| esci fluo- | .0005546 | .1113246  | .1931755  | .0485245  | -.1937301  | .1214485  | 0.111 |
| esci paro  | .0383115 | .0922882  | .0533117  | .0522797  | -.0150001  | .1060485  | 0.888 |
| esci sert  | .0591822 | .1211814  | .1291358  | .0579021  | -.0699536  | .1343053  | 0.602 |
| esci venl  | .065861  | .1078968  | .0588171  | .0536147  | .0070439   | .120589   | 0.953 |
| fluo fluv- | .1126686 | .1351202  | -.0390349 | .0643987  | -.0736337  | .1497068  | 0.623 |
| fluo miln- | .1652961 | .1471023  | -.0352478 | .0717488  | -.1300483  | .1636673  | 0.427 |
| fluo mirt- | .1964439 | .0988048  | -.117288  | .0623759  | -.0791559  | .1170072  | 0.499 |
| fluo nefa  | -.040939 | .1653198  | .0047798  | .1190907  | -.0457188  | .2037492  | 0.822 |
| fluo paro- | .1048271 | .0619164  | -.1159429 | .0404309  | .0111158   | .0739577  | 0.881 |
| fluo rebo  | -.066511 | .1413458  | .1407458  | .0894675  | -.2072568  | .1673351  | 0.216 |
| fluo sert- | .0839804 | .0757402  | -.0282443 | .0521699  | -.0557361  | .0919646  | 0.544 |
| fluo traz  | .0545399 | .1809548  | -.0162014 | .0950267  | -.0383385  | .204651   | 0.851 |
| fluo venl- | .0853557 | .0597703  | -.1130421 | .0482949  | .0276864   | .0769361  | 0.719 |
| fluv miln- | .1922666 | .1474932  | .0570737  | .0873882  | -.2493403  | .1714301  | 0.146 |
| fluv mirt- | .0637746 | .1144129  | -.0988758 | .0807128  | .0351013   | .1400172  | 0.802 |
| fluv paro- | .0120494 | .1727242  | -.066089  | .0620355  | .0540395   | .1835298  | 0.768 |
| fluv sert  | .1942694 | .1613438  | -.0281696 | .0693959  | .222439    | .1756396  | 0.205 |
| fluv venl- | .1647312 | .2664656  | -.0424986 | .0645521  | -.1222327  | .2741731  | 0.656 |
| miln paro- | .0658244 | .0873911  | -.0389923 | .0870669  | -.0268321  | .1233602  | 0.828 |
| mirt paro  | .0551035 | .0895213  | .0124208  | .0652775  | .0426828   | .1112353  | 0.701 |
| mirt venl  | .0052368 | .1072257  | .0499178  | .0652481  | -.044681   | .1255176  | 0.722 |
| nefa paro- | .1476319 | .1467949  | -.0670285 | .1276729  | -.0806034  | .194544   | 0.679 |
| nefa sert- | 4.77e-09 | .1852943  | -.0494861 | .1172212  | .0494861   | .2192596  | 0.821 |
| paro rebo  | .238503  | .1386985  | .1733964  | .0926324  | .0651066   | .1667873  | 0.696 |
| paro sert  | .0699296 | .1041508  | .0656133  | .0490683  | .0043163   | .1151462  | 0.970 |
| paro traz  | .1938981 | .1260637  | .0092994  | .1088734  | .1845987   | .1666091  | 0.268 |
| paro venl- | .0787694 | .1351125  | .0194973  | .042685   | -.0982667  | .1416948  | 0.488 |
| rebo venl- | .1513167 | .1745292  | -.1910701 | .0883765  | .0397534   | .1956293  | 0.839 |
| sert traz- | .1307873 | .1984509  | .0583241  | .0973059  | -.1891114  | .2210231  | 0.392 |
| sert venl  | .0093521 | .1260996  | -.0673504 | .0530686  | .0767025   | .1368114  | 0.575 |

### 8.3.3.3 Design-by-treatment test

chi2( 55) = 42.81

Prob > chi2 = 0.8145

## 8.3.4 Remission

### 8.3.4.1 Loop-specific approach

Loops With Evidence of Statistical Inconsistency:

| Loop           | IF    | seIF  | z_value | p_value | CI_95        | Loop_Heterog_tau2 |
|----------------|-------|-------|---------|---------|--------------|-------------------|
| cita-clom-venl | 2.334 | 0.710 | 3.288   | 0.001   | (0.94, 3.73) | 0.000             |
| cita-clom-fluo | 1.707 | 0.493 | 3.464   | 0.001   | (0.74, 2.67) | 0.000             |
| cita-esci-venl | 1.345 | 0.639 | 2.103   | 0.035   | (0.09, 2.60) | 0.184             |
| cita-clom-sert | 1.332 | 0.573 | 2.323   | 0.020   | (0.21, 2.46) | 0.031             |
| clom-fluo-miln | 1.108 | 0.543 | 2.041   | 0.041   | (0.04, 2.17) | 0.000             |
| agom-dulo-esci | 1.088 | 0.350 | 3.105   | 0.002   | (0.40, 1.77) | 0.000             |
| agom-dulo-venl | 1.006 | 0.326 | 3.090   | 0.002   | (0.37, 1.64) | 0.000             |
| cita-fluo-venl | 0.782 | 0.395 | 1.977   | 0.048   | (0.01, 1.56) | 0.009             |
| fluo-paro-venl | 0.533 | 0.258 | 2.063   | 0.039   | (0.03, 1.04) | 0.009             |

Loops Without Evidence of Statistical Inconsistency:

| Loop                | IF    | seIF  | z_value | p_value | CI_95        | Loop_Heterog_tau2 |
|---------------------|-------|-------|---------|---------|--------------|-------------------|
| cita-clom-mirt-paro | 1.447 | 0.797 | 1.814   | 0.070   | (0.00, 3.01) | 0.111             |
| cita-clom-fluv      | 1.444 | 0.783 | 1.846   | 0.065   | (0.00, 2.98) | 0.000             |
| bupr-sert-traz      | 1.428 | 1.218 | 1.173   | 0.241   | (0.00, 3.82) | 0.000             |
| cita-clom-paro-rebo | 1.322 | 1.085 | 1.219   | 0.223   | (0.00, 3.45) | 0.206             |
| cita-sert-venl      | 1.159 | 0.675 | 1.717   | 0.086   | (0.00, 2.48) | 0.189             |
| cita-fluv-sert      | 1.032 | 0.743 | 1.389   | 0.165   | (0.00, 2.49) | 0.111             |
| clom-fluo-fluv      | 0.959 | 0.604 | 1.588   | 0.112   | (0.00, 2.14) | 0.000             |
| agom-paro-venl      | 0.938 | 0.486 | 1.931   | 0.053   | (0.00, 1.89) | 0.070             |
| cita-esci-fluv-paro | 0.919 | 0.861 | 1.067   | 0.286   | (0.00, 2.61) | 0.157             |
| clom-fluv-sert      | 0.906 | 0.649 | 1.397   | 0.162   | (0.00, 2.18) | 0.000             |
| bupr-sert-venl      | 0.889 | 1.288 | 0.691   | 0.490   | (0.00, 3.41) | 0.157             |
| cita-clom-esci-paro | 0.843 | 0.792 | 1.064   | 0.287   | (0.00, 2.39) | 0.180             |
| fluv-mirt-venl      | 0.841 | 0.515 | 1.632   | 0.103   | (0.00, 1.85) | 0.000             |
| bupr-paro-venl      | 0.828 | 0.480 | 1.726   | 0.084   | (0.00, 1.77) | 0.000             |
| cita-fluv-venl      | 0.797 | 0.700 | 1.138   | 0.255   | (0.00, 2.17) | 0.000             |
| cita-esci-fluo      | 0.790 | 0.507 | 1.558   | 0.119   | (0.00, 1.78) | 0.143             |
| fluo-fluv-venl      | 0.738 | 0.502 | 1.469   | 0.142   | (0.00, 1.72) | 0.000             |
| paro-sert-traz      | 0.720 | 0.478 | 1.507   | 0.132   | (0.00, 1.66) | 0.000             |
| cita-mirt-venl      | 0.706 | 0.733 | 0.963   | 0.335   | (0.00, 2.14) | 0.102             |
| cita-fluo-fluv      | 0.696 | 0.536 | 1.298   | 0.194   | (0.00, 1.75) | 0.000             |
| cita-fluv-mirt      | 0.674 | 0.551 | 1.222   | 0.222   | (0.00, 1.75) | 0.000             |
| amit-sert-traz      | 0.666 | 0.502 | 1.328   | 0.184   | (0.00, 1.65) | 0.000             |
| cita-esci-sert      | 0.615 | 0.559 | 1.101   | 0.271   | (0.00, 1.71) | 0.189             |
| cita-esci-mirt-paro | 0.607 | 0.615 | 0.988   | 0.323   | (0.00, 1.81) | 0.126             |
| clom-fluo-paro      | 0.604 | 0.363 | 1.663   | 0.096   | (0.00, 1.32) | 0.063             |
| esci-fluo-paro      | 0.563 | 0.291 | 1.938   | 0.053   | (0.00, 1.13) | 0.010             |
| fluo-sert-traz      | 0.535 | 0.480 | 1.115   | 0.265   | (0.00, 1.47) | 0.000             |
| bupr-fluo-sert      | 0.534 | 1.180 | 0.453   | 0.651   | (0.00, 2.85) | 0.000             |
| amit-fluo-miln      | 0.526 | 0.499 | 1.055   | 0.292   | (0.00, 1.50) | 0.000             |
| amit-fluv-venl      | 0.502 | 0.649 | 0.773   | 0.439   | (0.00, 1.77) | 0.043             |
| agom-esci-paro      | 0.483 | 0.342 | 1.413   | 0.158   | (0.00, 1.15) | 0.018             |
| cita-esci-paro-rebo | 0.479 | 0.792 | 0.605   | 0.545   | (0.00, 2.03) | 0.169             |
| bupr-paro-traz      | 0.474 | 0.593 | 0.800   | 0.424   | (0.00, 1.64) | 0.000             |
| fluv-paro-sert      | 0.445 | 0.522 | 0.852   | 0.394   | (0.00, 1.47) | 0.000             |
| fluv-mirt-paro      | 0.433 | 0.446 | 0.971   | 0.332   | (0.00, 1.31) | 0.000             |
| clom-miln-paro      | 0.432 | 0.722 | 0.598   | 0.550   | (0.00, 1.85) | 0.111             |

|                     |       |       |       |       |             |       |
|---------------------|-------|-------|-------|-------|-------------|-------|
| cita-fluv-paro-rebo | 0.431 | 0.661 | 0.652 | 0.514 | (0.00,1.73) | 0.000 |
| esci-paro-venl      | 0.427 | 0.503 | 0.849 | 0.396 | (0.00,1.41) | 0.082 |
| esci-sert-venl      | 0.418 | 0.401 | 1.043 | 0.297 | (0.00,1.20) | 0.025 |
| clom-fluo-sert      | 0.400 | 0.373 | 1.072 | 0.284 | (0.00,1.13) | 0.000 |
| amit-miln-paro      | 0.380 | 0.405 | 0.937 | 0.349 | (0.00,1.17) | 0.000 |
| agom-fluo-venl      | 0.368 | 0.237 | 1.550 | 0.121 | (0.00,0.83) | 0.000 |
| mirt-paro-venl      | 0.366 | 0.416 | 0.880 | 0.379 | (0.00,1.18) | 0.048 |
| amit-nefa-paro      | 0.362 | 0.754 | 0.480 | 0.631 | (0.00,1.84) | 0.000 |
| bupr-fluo-traz      | 0.359 | 0.636 | 0.565 | 0.572 | (0.00,1.61) | 0.000 |
| amit-paro-venl      | 0.352 | 0.409 | 0.861 | 0.389 | (0.00,1.15) | 0.031 |
| fluo-fluv-sert      | 0.347 | 0.429 | 0.808 | 0.419 | (0.00,1.19) | 0.000 |
| agom-dulo-paro      | 0.343 | 0.381 | 0.900 | 0.368 | (0.00,1.09) | 0.022 |
| amit-fluo-nefa      | 0.327 | 0.775 | 0.421 | 0.674 | (0.00,1.85) | 0.000 |
| esci-fluo-venl      | 0.323 | 0.289 | 1.120 | 0.263 | (0.00,0.89) | 0.000 |
| esci-paro-sert      | 0.319 | 0.324 | 0.987 | 0.324 | (0.00,0.95) | 0.002 |
| paro-sert-venl      | 0.312 | 0.573 | 0.544 | 0.586 | (0.00,1.43) | 0.143 |
| amit-fluv-sert      | 0.310 | 0.442 | 0.702 | 0.483 | (0.00,1.18) | 0.000 |
| clom-fluv-paro      | 0.309 | 0.801 | 0.386 | 0.700 | (0.00,1.88) | 0.145 |
| amit-clom-miln-venl | 0.307 | 0.769 | 0.400 | 0.689 | (0.00,1.81) | 0.000 |
| fluo-sert-venl      | 0.294 | 0.244 | 1.202 | 0.229 | (0.00,0.77) | 0.000 |
| cita-fluo-rebo      | 0.293 | 0.380 | 0.772 | 0.440 | (0.00,1.04) | 0.000 |
| fluo-nefa-sert      | 0.291 | 0.541 | 0.538 | 0.591 | (0.00,1.35) | 0.000 |
| amit-clom-miln-sert | 0.289 | 0.624 | 0.463 | 0.643 | (0.00,1.51) | 0.000 |
| nefa-paro-sert      | 0.286 | 0.533 | 0.537 | 0.592 | (0.00,1.33) | 0.000 |
| amit-clom-fluv-miln | 0.280 | 0.877 | 0.320 | 0.749 | (0.00,2.00) | 0.056 |
| fluo-mirt-paro      | 0.268 | 0.256 | 1.046 | 0.296 | (0.00,0.77) | 0.000 |
| clom-paro-venl      | 0.262 | 0.917 | 0.286 | 0.775 | (0.00,2.06) | 0.238 |
| bupr-fluo-paro      | 0.251 | 0.583 | 0.430 | 0.667 | (0.00,1.39) | 0.005 |
| cita-rebo-venl      | 0.248 | 0.539 | 0.461 | 0.645 | (0.00,1.30) | 0.000 |
| dulo-esci-paro      | 0.247 | 0.299 | 0.827 | 0.408 | (0.00,0.83) | 0.010 |
| mirt-sert-venl      | 0.242 | 0.507 | 0.477 | 0.633 | (0.00,1.23) | 0.069 |
| amit-fluo-traz      | 0.238 | 0.434 | 0.547 | 0.584 | (0.00,1.09) | 0.000 |
| bupr-paro-sert      | 0.235 | 1.170 | 0.200 | 0.841 | (0.00,2.53) | 0.000 |
| dulo-paro-venl      | 0.232 | 0.455 | 0.509 | 0.611 | (0.00,1.12) | 0.055 |
| fluo-rebo-venl      | 0.214 | 0.454 | 0.470 | 0.638 | (0.00,1.10) | 0.000 |
| esci-fluo-sert      | 0.201 | 0.325 | 0.618 | 0.537 | (0.00,0.84) | 0.000 |
| fluv-mirt-sert      | 0.188 | 0.547 | 0.343 | 0.731 | (0.00,1.26) | 0.051 |
| cita-mirt-paro-rebo | 0.185 | 0.456 | 0.405 | 0.685 | (0.00,1.08) | 0.006 |
| mirt-paro-sert      | 0.175 | 0.317 | 0.554 | 0.580 | (0.00,0.80) | 0.001 |
| cita-mirt-sert      | 0.173 | 0.650 | 0.266 | 0.790 | (0.00,1.45) | 0.112 |
| amit-fluo-venl      | 0.146 | 0.323 | 0.454 | 0.650 | (0.00,0.78) | 0.000 |
| cita-fluo-mirt      | 0.143 | 0.360 | 0.398 | 0.690 | (0.00,0.85) | 0.004 |
| amit-nefa-sert      | 0.142 | 0.781 | 0.182 | 0.856 | (0.00,1.67) | 0.000 |
| fluo-paro-traz      | 0.137 | 0.396 | 0.347 | 0.729 | (0.00,0.91) | 0.000 |
| clom-fluo-venl      | 0.129 | 0.536 | 0.240 | 0.811 | (0.00,1.18) | 0.000 |
| cita-paro-rebo-sert | 0.128 | 0.562 | 0.228 | 0.820 | (0.00,1.23) | 0.048 |
| clom-paro-sert      | 0.121 | 0.563 | 0.215 | 0.830 | (0.00,1.22) | 0.114 |
| dulo-esci-venl      | 0.120 | 0.305 | 0.394 | 0.694 | (0.00,0.72) | 0.000 |
| fluo-fluv-mirt      | 0.115 | 0.366 | 0.316 | 0.752 | (0.00,0.83) | 0.000 |
| amit-fluo-sert      | 0.106 | 0.265 | 0.401 | 0.688 | (0.00,0.63) | 0.000 |
| clom-fluv-venl      | 0.093 | 0.810 | 0.114 | 0.909 | (0.00,1.68) | 0.000 |
| amit-fluo-paro      | 0.088 | 0.220 | 0.402 | 0.688 | (0.00,0.52) | 0.000 |
| agom-fluo-paro      | 0.080 | 0.285 | 0.282 | 0.778 | (0.00,0.64) | 0.021 |
| fluo-paro-rebo      | 0.078 | 0.365 | 0.215 | 0.830 | (0.00,0.79) | 0.000 |
| amit-bupr-traz-venl | 0.076 | 0.606 | 0.125 | 0.901 | (0.00,1.26) | 0.000 |
| amit-fluo-fluv      | 0.069 | 0.384 | 0.181 | 0.857 | (0.00,0.82) | 0.000 |
| fluo-paro-sert      | 0.069 | 0.254 | 0.272 | 0.785 | (0.00,0.57) | 0.000 |
| amit-paro-sert      | 0.066 | 0.271 | 0.244 | 0.808 | (0.00,0.60) | 0.000 |
| amit-fluv-paro      | 0.062 | 0.484 | 0.128 | 0.898 | (0.00,1.01) | 0.015 |
| fluo-miln-paro      | 0.058 | 0.345 | 0.168 | 0.867 | (0.00,0.73) | 0.000 |
| fluo-nefa-paro      | 0.053 | 0.517 | 0.103 | 0.918 | (0.00,1.07) | 0.000 |
| bupr-fluo-venl      | 0.051 | 0.490 | 0.104 | 0.917 | (0.00,1.01) | 0.000 |
| fluo-fluv-paro      | 0.050 | 0.465 | 0.108 | 0.914 | (0.00,0.96) | 0.000 |
| cita-fluo-sert      | 0.050 | 0.291 | 0.171 | 0.864 | (0.00,0.62) | 0.010 |
| fluo-mirt-sert      | 0.044 | 0.308 | 0.142 | 0.887 | (0.00,0.65) | 0.000 |
| amit-sert-venl      | 0.041 | 0.375 | 0.110 | 0.913 | (0.00,0.78) | 0.001 |
| agom-esci-venl      | 0.039 | 0.330 | 0.118 | 0.906 | (0.00,0.69) | 0.000 |
| clom-sert-venl      | 0.023 | 0.694 | 0.033 | 0.974 | (0.00,1.38) | 0.080 |
| fluo-mirt-venl      | 0.012 | 0.289 | 0.042 | 0.966 | (0.00,0.58) | 0.000 |
| amit-paro-traz      | 0.012 | 0.409 | 0.029 | 0.977 | (0.00,0.81) | 0.003 |
| agom-esci-fluo      | 0.005 | 0.310 | 0.017 | 0.986 | (0.00,0.61) | 0.000 |

### 8.3.4.2 Side-splitting

| Side      | Direct    |           | Indirect  |           | Difference |           |       |
|-----------|-----------|-----------|-----------|-----------|------------|-----------|-------|
|           | Coef.     | Std. Err. | Coef.     | Std. Err. | Coef.      | Std. Err. | P> z  |
| agom dulo | .6234503  | .2592641  | -.0729466 | .1430137  | .6963969   | .2960926  | 0.019 |
| agom esci | -.2207425 | .2303707  | .2382185  | .1287231  | -.458961   | .2638932  | 0.082 |
| agom fluo | .0370261  | .1725256  | -.1067063 | .1276805  | .1437324   | .2145508  | 0.503 |
| agom paro | .19437    | .1950423  | .0059383  | .1237384  | .1884317   | .2310855  | 0.415 |
| agom venl | -.2595933 | .2023589  | .182695   | .1211126  | -.4422883  | .2358413  | 0.061 |
| amit fluo | .1433022  | .159218   | -.1483395 | .1042078  | .0050373   | .1904468  | 0.979 |
| amit fluv | -.0600327 | .2709023  | -.0711222 | .1542565  | .0110895   | .3115862  | 0.972 |
| amit miln | -.4157296 | .399406   | -.0749736 | .164075   | -.340756   | .4317937  | 0.430 |
| amit nefa | .0953102  | .6811125  | -.2002606 | .2327999  | .2955708   | .7197986  | 0.681 |
| amit paro | -.0102981 | .122258   | -.0495495 | .1146336  | .0392513   | .1676749  | 0.815 |
| amit sert | -.1118952 | .1957148  | -.1034456 | .1150287  | -.0084496  | .2270131  | 0.970 |
| amit traz | -.3104324 | .3156806  | -.1409792 | .1849787  | -.1694532  | .3658706  | 0.643 |
| amit venl | .0626154  | .2929606  | -.0366823 | .1049696  | .0992978   | .311206   | 0.750 |
| bupr fluo | -.4560423 | .4467389  | -.4547051 | .2084543  | -.0013371  | .4929797  | 0.998 |
| bupr paro | .0285874  | .4007722  | -.4448935 | .2142873  | .4734809   | .4544638  | 0.297 |
| bupr sert | .2231389  | 1.10581   | -.4347678 | .200193   | .6579067   | 1.123785  | 0.558 |
| bupr traz | -.7463913 | .4157567  | -.3945967 | .2581918  | -.3517946  | .4894044  | 0.472 |
| bupr venl | -.4392146 | .2829709  | -.2495941 | .2517055  | -.1896205  | .3787192  | 0.617 |
| cita clom | 1.298033  | .4297473  | .0577907  | .138904   | 1.240243   | .4516382  | 0.006 |
| cita esci | .4928984  | .1173185  | -.1213499 | .1382455  | .6142483   | .18149    | 0.001 |
| cita fluo | -.0584436 | .1914976  | .0917294  | .110443   | -.1501731  | .221089   | 0.497 |
| cita fluv | -.5833963 | .4693608  | .2066134  | .150065   | -.7900097  | .4927667  | 0.109 |
| cita mirt | -.0870114 | .2986062  | .2002014  | .1327638  | -.2872127  | .3267903  | 0.379 |
| cita rebo | -.4534166 | .2685338  | -.0432042 | .1990596  | -.4102124  | .3342681  | 0.220 |
| cita sert | .0501854  | .206055   | .1119497  | .123842   | -.0617643  | .2404041  | 0.797 |
| cita venl | -.7682205 | .3517416  | .2646464  | .1096716  | -1.032867  | .3690367  | 0.005 |
| clom fluo | .3421894  | .2431069  | -.2460549 | .1275312  | .5882444   | .2743276  | 0.032 |
| clom fluv | -.4363221 | .5106611  | -.0021753 | .162141   | -.4341468  | .5357873  | 0.418 |
| clom miln | -.498664  | .418871   | -.0256673 | .1777178  | -.4729968  | .4550126  | 0.29  |
| clom paro | -.0319974 | .148244   | .0253304  | .1569356  | -.0573279  | .2158805  | 0.791 |
| clom sert | .0911531  | .2859228  | -.1182206 | .1362064  | .2093737   | .3167069  | 0.509 |
| clom venl | .2876819  | .5005675  | -.0176248 | .1262816  | .3053067   | .5162507  | 0.554 |
| dulo esci | .2420548  | .2069254  | -.063441  | .147557   | .3054958   | .2541282  | 0.229 |
| dulo paro | -.0878558 | .1875057  | .0062097  | .1441552  | -.0940655  | .23652    | 0.691 |
| dulo venl | .1272084  | .1882259  | -.1108109 | .1441451  | .2380193   | .2370676  | 0.315 |
| esci fluo | .2536616  | .2184839  | -.2663022 | .0964278  | .5199638   | .2387526  | 0.029 |
| esci paro | -.0669473 | .1828704  | -.0680956 | .1061064  | .0011484   | .2114458  | 0.996 |
| esci sert | .1976214  | .2499216  | -.2102412 | .1119537  | .4078626   | .2738098  | 0.136 |
| esci venl | .0028297  | .2238301  | -.0764378 | .106041   | .0792675   | .2476641  | 0.749 |
| fluo fluv | .1689046  | .2761632  | .0552206  | .1400451  | .1136839   | .3096127  | 0.713 |
| fluo miln | .2608349  | .3363229  | -.0319458 | .160884   | .2927807   | .3728228  | 0.432 |
| fluo mirt | .1366917  | .1966925  | .0854065  | .116125   | .0512852   | .2283761  | 0.822 |
| fluo nefa | -.0740596 | .3825706  | .000529   | .256416   | -.0745886  | .460532   | 0.871 |
| fluo paro | .2364097  | .1287154  | .0695953  | .0790252  | .1668144   | .1509597  | 0.269 |
| fluo rebo | -.1039729 | .2865555  | -.298179  | .1822568  | .1942061   | .3397262  | 0.568 |
| fluo sert | .1509848  | .146175   | -.0092996 | .098973   | .1602844   | .1764611  | 0.364 |
| fluo traz | .0607136  | .2959498  | -.0739122 | .1800549  | .1346259   | .346533   | 0.698 |
| fluo venl | .1026671  | .11057    | .136408   | .0965059  | -.0337408  | .1464736  | 0.818 |
| fluv mirt | -.1767502 | .2254925  | .1278427  | .1672736  | -.3045929  | .2807534  | 0.278 |
| fluv paro | .107648   | .3875086  | .0285051  | .1341185  | .0791429   | .4100911  | 0.847 |
| fluv sert | -.3744894 | .3387209  | .0240879  | .1451651  | -.3985773  | .3685026  | 0.279 |
| fluv venl | .6321095  | .4499498  | -.0136255 | .138065   | .6457349   | .4706555  | 0.170 |
| miln paro | .0356936  | .1713673  | .1959236  | .2279966  | -.16023    | .2851266  | 0.574 |
| mirt paro | .1288186  | .1637282  | .100516   | .1238685  | -.2293346  | .2054311  | 0.264 |
| mirt sert | -.0098147 | .2672884  | -.0674565 | .1230049  | .0576418   | .2942334  | 0.845 |
| mirt venl | -.0298415 | .2405777  | .0361494  | .1200942  | -.0659909  | .2688693  | 0.806 |
| nefa paro | .2704112  | .3601378  | .0669878  | .264014   | .2034234   | .4465036  | 0.649 |
| nefa sert | -.0655973 | .4017572  | .1164611  | .2565356  | -.1820584  | .4766753  | 0.703 |
| paro rebo | -.4105341 | .272158   | -.3315163 | .1896937  | -.0790179  | .3317434  | 0.812 |
| paro sert | -.0279577 | .2085221  | -.0841285 | .0948523  | .0561709   | .2291453  | 0.806 |
| paro traz | -.2905221 | .2754681  | -.0915147 | .1842626  | -.1990073  | .3315104  | 0.548 |
| paro venl | .4098544  | .2264543  | -.0517998 | .0846832  | .4616542   | .2416861  | 0.056 |
| rebo venl | -.04652   | .3897696  | .4449159  | .1732643  | -.4914359  | .4265453  | 0.249 |
| sert traz | .4587335  | .3943884  | -.1857429 | .1759788  | .6444764   | .4318689  | 0.136 |
| sert venl | .219623   | .206775   | .0457009  | .1028339  | .1739221   | .2309029  | 0.451 |

### 8.3.4.3 Design-by-treatment test

chi2( 56) = 69.35

Prob > chi2 = 0.0652

## 8.3.5 Dropouts due to adverse events

### 8.3.5.1 Loop-specific approach

Loops With Evidence of Statistical Inconsistency:

| Loop           | IF    | seIF  | z_value | p_value | CI_95        | Loop_Heterog_tau2 |
|----------------|-------|-------|---------|---------|--------------|-------------------|
| mirt-sert-traz | 3.232 | 1.092 | 2.960   | 0.003   | (1.09, 5.37) | 0.000             |
| paro-sert-traz | 2.189 | 1.058 | 2.069   | 0.039   | (0.12, 4.26) | 0.000             |
| Plac-mirt-sert | 1.997 | 0.690 | 2.892   | 0.004   | (0.64, 3.35) | 0.126             |
| agom-dulo-venl | 1.909 | 0.587 | 3.252   | 0.001   | (0.76, 3.06) | 0.000             |
| agom-dulo-esci | 1.904 | 0.792 | 2.405   | 0.016   | (0.35, 3.46) | 0.087             |
| cita-fluo-venl | 1.876 | 0.933 | 2.011   | 0.044   | (0.05, 3.70) | 0.020             |
| amit-mirt-sert | 1.673 | 0.602 | 2.780   | 0.005   | (0.49, 2.85) | 0.000             |
| dulo-venl-vort | 1.577 | 0.427 | 3.694   | 0.000   | (0.74, 2.41) | 0.017             |
| esci-paro-venl | 1.297 | 0.579 | 2.240   | 0.025   | (0.16, 2.43) | 0.000             |
| agom-paro-venl | 1.278 | 0.489 | 2.612   | 0.009   | (0.32, 2.24) | 0.000             |
| amit-fluo-sert | 1.270 | 0.439 | 2.896   | 0.004   | (0.41, 2.13) | 0.029             |
| Plac-fluv-mirt | 1.199 | 0.428 | 2.803   | 0.005   | (0.36, 2.04) | 0.000             |
| Plac-dulo-venl | 1.025 | 0.338 | 3.032   | 0.002   | (0.36, 1.69) | 0.037             |
| amit-fluo-paro | 0.795 | 0.340 | 2.338   | 0.019   | (0.13, 1.46) | 0.000             |
| Plac-dulo-esci | 0.675 | 0.300 | 2.252   | 0.024   | (0.09, 1.26) | 0.000             |
| Plac-paro-venl | 0.583 | 0.297 | 1.962   | 0.050   | (0.00, 1.17) | 0.009             |

Loops Without Evidence of Statistical Inconsistency:

| Loop                | IF    | seIF  | z_value | p_value | CI_95        | Loop_Heterog_tau2 |
|---------------------|-------|-------|---------|---------|--------------|-------------------|
| Plac-cita-clom      | 3.244 | 1.849 | 1.755   | 0.079   | (0.00, 6.87) | 0.000             |
| cita-clom-fluv      | 2.428 | 1.998 | 1.216   | 0.224   | (0.00, 6.34) | 0.000             |
| clom-fluv-mirt-venl | 2.094 | 1.436 | 1.458   | 0.145   | (0.00, 4.91) | 0.000             |
| clom-fluo-fluv      | 1.985 | 1.700 | 1.167   | 0.243   | (0.00, 5.32) | 0.000             |
| bupr-esci-sert-traz | 1.957 | 1.789 | 1.094   | 0.274   | (0.00, 5.46) | 0.658             |
| Plac-clom-sert      | 1.904 | 1.254 | 1.517   | 0.129   | (0.00, 4.36) | 0.141             |
| Plac-clom-fluo      | 1.879 | 1.209 | 1.555   | 0.120   | (0.00, 4.25) | 0.058             |
| amit-clom-fluv-venl | 1.798 | 1.489 | 1.207   | 0.227   | (0.00, 4.72) | 0.000             |
| Plac-cita-venl      | 1.677 | 0.908 | 1.847   | 0.065   | (0.00, 3.46) | 0.057             |
| Plac-clom-venl      | 1.622 | 1.279 | 1.269   | 0.205   | (0.00, 4.13) | 0.104             |
| fluo-sert-traz      | 1.604 | 0.990 | 1.620   | 0.105   | (0.00, 3.54) | 0.000             |
| cita-fluo-sert      | 1.584 | 0.977 | 1.622   | 0.105   | (0.00, 3.50) | 0.000             |
| cita-mirt-sert      | 1.570 | 1.196 | 1.313   | 0.189   | (0.00, 3.91) | 0.000             |
| cita-clom-fluo      | 1.544 | 1.614 | 0.957   | 0.339   | (0.00, 4.71) | 0.000             |
| agom-dulo-fluo      | 1.533 | 1.172 | 1.307   | 0.191   | (0.00, 3.83) | 0.000             |
| Plac-sert-traz      | 1.501 | 1.002 | 1.497   | 0.134   | (0.00, 3.47) | 0.132             |
| cita-paro-venl      | 1.472 | 0.994 | 1.481   | 0.139   | (0.00, 3.42) | 0.000             |
| bupr-paro-venl      | 1.417 | 0.756 | 1.875   | 0.061   | (0.00, 2.90) | 0.000             |
| Plac-clom-paro      | 1.375 | 1.075 | 1.279   | 0.201   | (0.00, 3.48) | 0.000             |
| amit-sert-traz      | 1.295 | 0.961 | 1.347   | 0.178   | (0.00, 3.18) | 0.006             |
| Plac-amit-clom-miln | 1.263 | 1.688 | 0.748   | 0.454   | (0.00, 4.57) | 0.267             |
| amit-fluv-sert      | 1.252 | 0.948 | 1.320   | 0.187   | (0.00, 3.11) | 0.073             |
| amit-bupr-fluo      | 1.232 | 1.410 | 0.873   | 0.382   | (0.00, 4.00) | 0.223             |
| mirt-paro-sert      | 1.221 | 0.772 | 1.581   | 0.114   | (0.00, 2.73) | 0.000             |
| fluv-mirt-paro      | 1.202 | 0.843 | 1.427   | 0.154   | (0.00, 2.85) | 0.165             |
| cita-esci-venl      | 1.170 | 0.971 | 1.204   | 0.228   | (0.00, 3.07) | 0.043             |
| Plac-dulo-fluo      | 1.154 | 1.121 | 1.030   | 0.303   | (0.00, 3.35) | 0.038             |
| agom-esci-fluo      | 1.142 | 0.589 | 1.940   | 0.052   | (0.00, 2.30) | 0.000             |
| Plac-cita-mirt      | 1.130 | 0.708 | 1.595   | 0.111   | (0.00, 2.52) | 0.025             |
| cita-esci-sert      | 1.130 | 1.064 | 1.062   | 0.288   | (0.00, 3.21) | 0.055             |

|       |                |       |       |       |       |              |       |
|-------|----------------|-------|-------|-------|-------|--------------|-------|
|       | cita-fluo-fluv | 1.100 | 1.128 | 0.976 | 0.329 | (0.00, 3.31) | 0.000 |
|       | amit-bupr-venl | 1.095 | 1.323 | 0.828 | 0.408 | (0.00, 3.69) | 0.000 |
|       | cita-clom-paro | 1.054 | 1.660 | 0.635 | 0.525 | (0.00, 4.31) | 0.041 |
|       | mirt-sert-venl | 1.049 | 0.696 | 1.507 | 0.132 | (0.00, 2.41) | 0.000 |
|       | clom-fluv-paro | 1.038 | 1.687 | 0.616 | 0.538 | (0.00, 4.34) | 0.231 |
|       | cita-fluv-sert | 1.024 | 1.238 | 0.827 | 0.408 | (0.00, 3.45) | 0.000 |
|       | cita-esci-paro | 1.020 | 0.667 | 1.529 | 0.126 | (0.00, 2.33) | 0.000 |
|       | clom-fluo-miln | 1.001 | 0.813 | 1.231 | 0.218 | (0.00, 2.59) | 0.000 |
|       | amit-fluv-paro | 0.991 | 0.640 | 1.548 | 0.122 | (0.00, 2.25) | 0.000 |
|       | clom-fluv-sert | 0.986 | 2.541 | 0.388 | 0.698 | (0.00, 5.97) | 1.291 |
|       | dulo-esci-paro | 0.960 | 0.504 | 1.904 | 0.057 | (0.00, 1.95) | 0.000 |
|       | Plac-nefa-sert | 0.950 | 0.600 | 1.581 | 0.114 | (0.00, 2.13) | 0.074 |
|       | dulo-fluo-paro | 0.943 | 1.115 | 0.846 | 0.398 | (0.00, 3.13) | 0.000 |
|       | amit-fluo-miln | 0.935 | 0.960 | 0.975 | 0.330 | (0.00, 2.82) | 0.070 |
|       | Plac-paro-sert | 0.933 | 0.561 | 1.663 | 0.096 | (0.00, 2.03) | 0.003 |
|       | amit-bupr-traz | 0.885 | 1.323 | 0.669 | 0.503 | (0.00, 3.48) | 0.000 |
|       | Plac-amit-bupr | 0.884 | 1.259 | 0.702 | 0.483 | (0.00, 3.35) | 0.132 |
|       | amit-fluo-traz | 0.862 | 0.777 | 1.109 | 0.267 | (0.00, 2.39) | 0.101 |
|       | esci-fluo-paro | 0.837 | 0.503 | 1.663 | 0.096 | (0.00, 1.82) | 0.000 |
|       | cita-fluo-mirt | 0.830 | 0.743 | 1.116 | 0.264 | (0.00, 2.29) | 0.000 |
|       | Plac-cita-paro | 0.824 | 0.526 | 1.567 | 0.117 | (0.00, 1.86) | 0.000 |
|       | fluo-mirt-sert | 0.815 | 0.620 | 1.315 | 0.189 | (0.00, 2.03) | 0.000 |
|       | fluo-mirt-traz | 0.812 | 0.704 | 1.153 | 0.249 | (0.00, 2.19) | 0.000 |
|       | cita-fluo-paro | 0.806 | 0.591 | 1.363 | 0.173 | (0.00, 1.96) | 0.000 |
|       | dulo-esci-fluo | 0.799 | 1.186 | 0.674 | 0.500 | (0.00, 3.12) | 0.037 |
|       | amit-fluv-miln | 0.794 | 0.994 | 0.799 | 0.425 | (0.00, 2.74) | 0.000 |
|       | cita-paro-sert | 0.794 | 1.134 | 0.700 | 0.484 | (0.00, 3.02) | 0.000 |
|       | cita-mirt-venl | 0.788 | 1.067 | 0.738 | 0.460 | (0.00, 2.88) | 0.000 |
|       | fluo-traz-venl | 0.773 | 0.671 | 1.152 | 0.249 | (0.00, 2.09) | 0.030 |
|       | clom-fluo-sert | 0.762 | 0.684 | 1.115 | 0.265 | (0.00, 2.10) | 0.000 |
|       | dulo-esci-venl | 0.745 | 0.671 | 1.110 | 0.267 | (0.00, 2.06) | 0.114 |
|       | Plac-fluo-sert | 0.736 | 0.377 | 1.951 | 0.051 | (0.00, 1.48) | 0.072 |
|       | Plac-sert-venl | 0.724 | 0.515 | 1.406 | 0.160 | (0.00, 1.73) | 0.095 |
|       | cita-clom-sert | 0.722 | 1.788 | 0.404 | 0.686 | (0.00, 4.23) | 0.000 |
| amit- | cita-fluv-venl | 0.690 | 1.069 | 0.645 | 0.519 | (0.00, 2.78) | 0.000 |
|       | agom-esci-venl | 0.690 | 0.694 | 0.994 | 0.320 | (0.00, 2.05) | 0.000 |
|       | bupr-traz-venl | 0.681 | 0.714 | 0.954 | 0.340 | (0.00, 2.08) | 0.000 |
|       | Plac-agom-esci | 0.680 | 0.526 | 1.292 | 0.196 | (0.00, 1.71) | 0.000 |
|       | fluo-fluv-paro | 0.672 | 1.193 | 0.563 | 0.573 | (0.00, 3.01) | 0.044 |
|       | agom-esci-paro | 0.671 | 0.659 | 1.019 | 0.308 | (0.00, 1.96) | 0.000 |
|       | Plac-cita-sert | 0.671 | 0.960 | 0.699 | 0.485 | (0.00, 2.55) | 0.053 |
|       | Plac-amit-fluv | 0.671 | 0.446 | 1.505 | 0.132 | (0.00, 1.54) | 0.062 |
|       | paro-rebo-venl | 0.666 | 1.011 | 0.659 | 0.510 | (0.00, 2.65) | 0.336 |
|       | fluo-miln-paro | 0.665 | 0.425 | 1.566 | 0.117 | (0.00, 1.50) | 0.000 |
|       | Plac-esci-sert | 0.649 | 0.520 | 1.248 | 0.212 | (0.00, 1.67) | 0.046 |
|       | amit-sert-venl | 0.648 | 0.652 | 0.994 | 0.320 | (0.00, 1.93) | 0.000 |
|       | esci-paro-sert | 0.644 | 0.801 | 0.805 | 0.421 | (0.00, 2.21) | 0.000 |
|       | Plac-desv-dulo | 0.637 | 0.396 | 1.609 | 0.108 | (0.00, 1.41) | 0.000 |
|       | Plac-fluv-sert | 0.636 | 0.867 | 0.734 | 0.463 | (0.00, 2.34) | 0.068 |
|       | amit-fluo-venl | 0.634 | 0.603 | 1.050 | 0.294 | (0.00, 1.82) | 0.050 |
|       | cita-esci-fluo | 0.623 | 0.488 | 1.276 | 0.202 | (0.00, 1.58) | 0.000 |
|       | Plac-fluo-fluv | 0.605 | 1.053 | 0.574 | 0.566 | (0.00, 2.67) | 0.019 |
| amit- | clom-miln-sert | 0.595 | 1.119 | 0.531 | 0.595 | (0.00, 2.79) | 0.052 |
|       | clom-fluv-miln | 0.588 | 1.490 | 0.395 | 0.693 | (0.00, 3.51) | 0.000 |
|       | Plac-amit-fluo | 0.578 | 0.374 | 1.544 | 0.123 | (0.00, 1.31) | 0.131 |
|       | Plac-bupr-paro | 0.574 | 0.627 | 0.915 | 0.360 | (0.00, 1.80) | 0.000 |
|       | fluo-paro-traz | 0.570 | 0.603 | 0.944 | 0.345 | (0.00, 1.75) | 0.000 |
|       | Plac-agom-dulo | 0.567 | 0.429 | 1.323 | 0.186 | (0.00, 1.41) | 0.000 |
|       | Plac-fluo-traz | 0.563 | 0.602 | 0.935 | 0.350 | (0.00, 1.74) | 0.079 |
|       | bupr-paro-traz | 0.553 | 0.828 | 0.668 | 0.504 | (0.00, 2.18) | 0.000 |
|       | amit-fluo-fluv | 0.547 | 1.125 | 0.486 | 0.627 | (0.00, 2.75) | 0.026 |
|       | bupr-fluo-paro | 0.540 | 0.720 | 0.750 | 0.453 | (0.00, 1.95) | 0.009 |
|       | Plac-fluo-rebo | 0.518 | 0.344 | 1.508 | 0.132 | (0.00, 1.19) | 0.050 |
|       | clom-sert-venl | 0.514 | 0.790 | 0.651 | 0.515 | (0.00, 2.06) | 0.000 |
|       | amit-miln-paro | 0.511 | 0.809 | 0.632 | 0.528 | (0.00, 2.10) | 0.000 |
|       | Plac-cita-vila | 0.493 | 0.452 | 1.092 | 0.275 | (0.00, 1.38) | 0.000 |
|       | agom-fluo-venl | 0.492 | 0.441 | 1.116 | 0.265 | (0.00, 1.36) | 0.000 |
|       | fluo-fluv-sert | 0.482 | 1.669 | 0.289 | 0.773 | (0.00, 3.75) | 0.194 |
|       | amit-paro-sert | 0.480 | 0.575 | 0.835 | 0.404 | (0.00, 1.61) | 0.000 |
|       | Plac-clom-fluv | 0.479 | 1.661 | 0.288 | 0.773 | (0.00, 3.73) | 0.000 |
|       | amit-traz-venl | 0.471 | 0.759 | 0.621 | 0.535 | (0.00, 1.96) | 0.000 |
|       | bupr-fluo-venl | 0.466 | 0.629 | 0.742 | 0.458 | (0.00, 1.70) | 0.048 |
|       | cita-fluv-paro | 0.452 | 0.800 | 0.565 | 0.572 | (0.00, 2.02) | 0.000 |
|       | bupr-fluo-traz | 0.446 | 1.059 | 0.421 | 0.674 | (0.00, 2.52) | 0.301 |
|       | cita-mirt-paro | 0.445 | 0.820 | 0.543 | 0.587 | (0.00, 2.05) | 0.000 |
|       | Plac-nefa-paro | 0.445 | 0.448 | 0.993 | 0.321 | (0.00, 1.32) | 0.000 |
|       | Plac-fluo-mirt | 0.439 | 0.362 | 1.214 | 0.225 | (0.00, 1.15) | 0.073 |

|       |                |       |       |       |       |             |       |
|-------|----------------|-------|-------|-------|-------|-------------|-------|
|       | Plac-agom-paro | 0.433 | 0.274 | 1.580 | 0.114 | (0.00,0.97) | 0.000 |
|       | fluo-mirt-paro | 0.421 | 0.358 | 1.176 | 0.240 | (0.00,1.12) | 0.000 |
|       | fluo-paro-venl | 0.420 | 0.308 | 1.363 | 0.173 | (0.00,1.02) | 0.000 |
|       | clom-paro-sert | 0.420 | 0.820 | 0.513 | 0.608 | (0.00,2.03) | 0.077 |
| amit- | clom-miln-venl | 0.416 | 1.184 | 0.351 | 0.725 | (0.00,2.74) | 0.000 |
|       | Plac-amit-mirt | 0.415 | 0.431 | 0.963 | 0.335 | (0.00,1.26) | 0.091 |
|       | amit-paro-traz | 0.411 | 0.591 | 0.695 | 0.487 | (0.00,1.57) | 0.000 |
|       | dulo-paro-venl | 0.408 | 0.401 | 1.015 | 0.310 | (0.00,1.19) | 0.000 |
|       | amit-fluo-mirt | 0.402 | 0.455 | 0.885 | 0.376 | (0.00,1.29) | 0.000 |
|       | nefa-paro-sert | 0.401 | 0.791 | 0.507 | 0.612 | (0.00,1.95) | 0.000 |
|       | fluo-fluv-miln | 0.395 | 1.212 | 0.326 | 0.744 | (0.00,2.77) | 0.000 |
|       | cita-fluv-mirt | 0.395 | 0.794 | 0.497 | 0.619 | (0.00,1.95) | 0.000 |
|       | fluo-nefa-paro | 0.390 | 0.723 | 0.540 | 0.589 | (0.00,1.81) | 0.000 |
|       | fluv-miln-paro | 0.387 | 1.059 | 0.366 | 0.715 | (0.00,2.46) | 0.133 |
|       | Plac-esci-paro | 0.384 | 0.433 | 0.887 | 0.375 | (0.00,1.23) | 0.000 |
|       | agom-fluo-paro | 0.366 | 0.311 | 1.175 | 0.240 | (0.00,0.98) | 0.000 |
|       | Plac-bupr-esci | 0.358 | 0.470 | 0.763 | 0.445 | (0.00,1.28) | 0.000 |
|       | Plac-esci-venl | 0.357 | 0.419 | 0.850 | 0.395 | (0.00,1.18) | 0.047 |
|       | clom-paro-venl | 0.356 | 0.618 | 0.576 | 0.565 | (0.00,1.57) | 0.000 |
|       | Plac-amit-paro | 0.343 | 0.246 | 1.398 | 0.162 | (0.00,0.82) | 0.012 |
|       | Plac-venl-vort | 0.342 | 0.366 | 0.935 | 0.350 | (0.00,1.06) | 0.048 |
|       | Plac-cita-fluv | 0.337 | 0.446 | 0.756 | 0.449 | (0.00,1.21) | 0.000 |
|       | Plac-esci-fluo | 0.328 | 0.323 | 1.014 | 0.311 | (0.00,0.96) | 0.000 |
|       | Plac-agom-venl | 0.323 | 0.426 | 0.757 | 0.449 | (0.00,1.16) | 0.005 |
|       | clom-fluo-paro | 0.318 | 0.536 | 0.592 | 0.554 | (0.00,1.37) | 0.000 |
|       | amit-fluv-mirt | 0.273 | 0.537 | 0.509 | 0.611 | (0.00,1.32) | 0.000 |
|       | bupr-esci-fluo | 0.271 | 0.830 | 0.327 | 0.744 | (0.00,1.90) | 0.227 |
|       | cita-sert-venl | 0.267 | 1.286 | 0.208 | 0.835 | (0.00,2.79) | 0.000 |
|       | Plac-amit-traz | 0.260 | 0.703 | 0.370 | 0.711 | (0.00,1.64) | 0.214 |
|       | amit-mirt-traz | 0.260 | 0.703 | 0.371 | 0.711 | (0.00,1.64) | 0.000 |
|       | clom-fluo-venl | 0.256 | 0.745 | 0.344 | 0.731 | (0.00,1.72) | 0.004 |
|       | Plac-bupr-traz | 0.252 | 0.559 | 0.450 | 0.653 | (0.00,1.35) | 0.010 |
|       | esci-sert-venl | 0.251 | 0.727 | 0.346 | 0.729 | (0.00,1.68) | 0.030 |
|       | Plac-bupr-venl | 0.247 | 0.517 | 0.478 | 0.632 | (0.00,1.26) | 0.061 |
|       | amit-paro-venl | 0.243 | 0.558 | 0.435 | 0.663 | (0.00,1.34) | 0.000 |
|       | fluo-mirt-venl | 0.239 | 0.350 | 0.684 | 0.494 | (0.00,0.92) | 0.000 |
|       | Plac-dulo-vort | 0.239 | 0.275 | 0.870 | 0.385 | (0.00,0.78) | 0.032 |
|       | fluo-rebo-venl | 0.239 | 0.685 | 0.349 | 0.727 | (0.00,1.58) | 0.035 |
|       | mirt-paro-venl | 0.238 | 0.408 | 0.584 | 0.559 | (0.00,1.04) | 0.000 |
|       | mirt-traz-venl | 0.234 | 0.667 | 0.352 | 0.725 | (0.00,1.54) | 0.000 |
|       | Plac-paro-traz | 0.232 | 0.472 | 0.490 | 0.624 | (0.00,1.16) | 0.000 |
|       | Plac-mirt-venl | 0.230 | 0.396 | 0.581 | 0.561 | (0.00,1.00) | 0.088 |
|       | Plac-fluo-nefa | 0.229 | 0.663 | 0.345 | 0.730 | (0.00,1.53) | 0.044 |
|       | agom-dulo-paro | 0.223 | 0.471 | 0.474 | 0.635 | (0.00,1.15) | 0.000 |
|       | Plac-bupr-fluo | 0.219 | 0.467 | 0.469 | 0.639 | (0.00,1.13) | 0.072 |
|       | Plac-cita-esci | 0.217 | 0.347 | 0.624 | 0.533 | (0.00,0.90) | 0.000 |
|       | Plac-fluo-paro | 0.215 | 0.187 | 1.149 | 0.251 | (0.00,0.58) | 0.000 |
|       | Plac-paro-rebo | 0.209 | 0.321 | 0.650 | 0.516 | (0.00,0.84) | 0.068 |
|       | esci-fluo-sert | 0.208 | 0.585 | 0.355 | 0.722 | (0.00,1.36) | 0.000 |
|       | Plac-rebo-venl | 0.202 | 0.727 | 0.277 | 0.782 | (0.00,1.63) | 0.129 |
|       | Plac-mirt-traz | 0.201 | 0.683 | 0.294 | 0.769 | (0.00,1.54) | 0.125 |
|       | Plac-cita-fluo | 0.198 | 0.432 | 0.457 | 0.648 | (0.00,1.04) | 0.037 |
|       | Plac-agom-fluo | 0.189 | 0.278 | 0.680 | 0.496 | (0.00,0.73) | 0.000 |
|       | paro-traz-venl | 0.183 | 0.604 | 0.303 | 0.762 | (0.00,1.37) | 0.000 |
|       | mirt-paro-traz | 0.179 | 0.651 | 0.275 | 0.784 | (0.00,1.45) | 0.000 |
|       | Plac-traz-venl | 0.176 | 0.638 | 0.275 | 0.783 | (0.00,1.43) | 0.114 |
|       | fluv-mirt-sert | 0.145 | 1.870 | 0.078 | 0.938 | (0.00,3.81) | 0.623 |
|       | Plac-amit-sert | 0.142 | 0.345 | 0.413 | 0.680 | (0.00,0.82) | 0.091 |
|       | fluo-fluv-mirt | 0.124 | 1.102 | 0.113 | 0.910 | (0.00,2.28) | 0.000 |
|       | dulo-fluo-venl | 0.118 | 1.135 | 0.104 | 0.917 | (0.00,2.34) | 0.006 |
|       | Plac-mirt-paro | 0.117 | 0.313 | 0.375 | 0.708 | (0.00,0.73) | 0.000 |
|       | amit-bupr-paro | 0.079 | 1.324 | 0.060 | 0.952 | (0.00,2.67) | 0.000 |
|       | cita-clom-venl | 0.060 | 1.802 | 0.033 | 0.974 | (0.00,3.59) | 0.000 |
|       | esci-fluo-venl | 0.059 | 0.476 | 0.125 | 0.901 | (0.00,0.99) | 0.018 |
| amit- | bupr-esci-sert | 0.055 | 1.492 | 0.037 | 0.970 | (0.00,2.98) | 0.130 |
|       | Plac-dulo-paro | 0.045 | 0.241 | 0.188 | 0.851 | (0.00,0.52) | 0.000 |
|       | fluo-paro-rebo | 0.045 | 0.454 | 0.100 | 0.921 | (0.00,0.94) | 0.130 |
|       | Plac-fluo-venl | 0.033 | 0.247 | 0.135 | 0.893 | (0.00,0.52) | 0.078 |
|       | amit-mirt-paro | 0.028 | 0.398 | 0.071 | 0.944 | (0.00,0.81) | 0.000 |
|       | Plac-amit-venl | 0.027 | 0.602 | 0.045 | 0.964 | (0.00,1.21) | 0.158 |
|       | Plac-fluv-paro | 0.024 | 0.574 | 0.042 | 0.967 | (0.00,1.15) | 0.000 |
|       | amit-mirt-venl | 0.024 | 0.592 | 0.040 | 0.968 | (0.00,1.18) | 0.000 |
|       | clom-miln-paro | 0.018 | 0.615 | 0.029 | 0.977 | (0.00,1.22) | 0.000 |
|       | bupr-esci-paro | 0.017 | 1.202 | 0.014 | 0.989 | (0.00,2.37) | 0.364 |
|       | fluo-paro-sert | 0.016 | 0.606 | 0.026 | 0.979 | (0.00,1.20) | 0.000 |
|       | bupr-esci-venl | 0.015 | 1.355 | 0.011 | 0.991 | (0.00,2.67) | 0.654 |
|       | fluo-sert-venl | 0.006 | 0.511 | 0.011 | 0.991 | (0.00,1.01) | 0.000 |



### 8.3.5.2 Side-splitting

| Side      | Direct<br>Coef. | Std. Err. | Indirect<br>Coef. | Std. Err. | Difference<br>Coef. | Std. Err. | P> z  |
|-----------|-----------------|-----------|-------------------|-----------|---------------------|-----------|-------|
| agom dulo | .071656         | .4231495  | 1.405661          | .2628502  | -1.334005           | .4981423  | 0.007 |
| agom esci | 1.183817        | .5066484  | -.0648548         | .254886   | 1.248672            | .5671449  | 0.028 |
| agom fluo | .3706843        | .286011   | .3627269          | .2337901  | .0079574            | .36879    | 0.983 |
| agom paro | .383754         | .3136438  | .6267815          | .2259473  | -.2430274           | .3866153  | 0.530 |
| agom venl | 1.299743        | .4048458  | .715701           | .2098939  | .5840418            | .4558364  | 0.200 |
| amit bupr | .4834188        | 1.193323  | -.3274338         | .3292175  | .8108526            | 1.237904  | 0.512 |
| amit fluo | -1.07203        | .2791787  | -.1672649         | .1624183  | -.9047652           | .3230952  | 0.005 |
| amit fluv | -.5677627       | .3420054  | -.0500238         | .2602087  | -.5177389           | .4298427  | 0.228 |
| amit miln | -.5868086       | .7981444  | -.5337424         | .2341838  | -.0530663           | .8317911  | 0.949 |
| amit paro | -.0168418       | .1767244  | -.4596895         | .1920549  | .4428477            | .2584835  | 0.087 |
| amit sert | -.2152856       | .2842755  | -.7730865         | .2176022  | .5578009            | .3579508  | 0.119 |
| amit traz | -.0859177       | .471326   | -.1143251         | .285858   | .0284074            | .551027   | 0.959 |
| amit venl | .0054928        | .5012419  | .0829282          | .1720514  | -.0774353           | .5299573  | 0.884 |
| bupr paro | -.5487831       | .6374914  | .2260854          | .3483917  | -.7748685           | .7264795  | 0.286 |
| bupr traz | .326327         | .4962342  | .0360934          | .4380122  | .2902337            | .6618935  | 0.661 |
| bupr venl | .6167637        | .4548642  | .1193331          | .414267   | .4974305            | .6152384  | 0.419 |
| cita clom | 2.269283        | 1.519873  | .8128087          | .2834529  | 1.456474            | 1.546078  | 0.346 |
| cita esci | -.4432333       | .4348477  | .1032593          | .3250728  | -.5464926           | .5437309  | 0.315 |
| cita fluo | -.4855696       | .3610326  | .4249282          | .2820119  | -.9104978           | .4580013  | 0.047 |
| cita fluv | .588455         | .4144032  | .0296754          | .3266222  | .5587796            | .5276476  | 0.290 |
| cita mirt | .6931459        | .6654509  | .193572           | .2700347  | .4995739            | .7181529  | 0.487 |
| cita sert | .8615676        | .9047157  | -.170473          | .2701657  | 1.032041            | .9435401  | 0.274 |
| cita venl | 1.85453         | .8654943  | .452154           | .2465058  | 1.402376            | .8999133  | 0.119 |
| clom fluo | -1.195107       | .5183874  | -.7146526         | .2088795  | -.4804544           | .558886   | 0.390 |
| clom fluv | .747199         | 1.288331  | -.6752484         | .2608237  | 1.422447            | 1.314468  | 0.279 |
| clom miln | -.6505839       | .5973387  | -.973166          | .2742317  | .322582             | .6572796  | 0.624 |
| clom paro | -.5825751       | .2341298  | -.6320714         | .2759904  | .0494963            | .3616185  | 0.891 |
| clom sert | -.8167654       | .438163   | -.9920341         | .2510942  | .1752688            | .5049326  | 0.729 |
| clom venl | -.4744552       | .5866441  | -.2800555         | .2196129  | -.1943997           | .6264034  | 0.756 |
| dulo esci | -1.061139       | .3658429  | -.7236774         | .3006593  | -.3374615           | .4737016  | 0.476 |
| dulo paro | -.1851954       | .4138518  | -.6200026         | .2452327  | .4348072            | .4810534  | 0.366 |
| dulo venl | -.6915066       | .2857055  | .1876045          | .2597468  | -.879111            | .3860944  | 0.023 |
| esci fluo | .3611136        | .4651178  | .1302325          | .2230887  | .2308811            | .5158207  | 0.654 |
| esci paro | -.3045203       | .6379104  | .4287341          | .2169662  | -.7332544           | .6737983  | 0.276 |
| esci sert | .1814836        | .6962149  | -.0163941         | .2522738  | .1978777            | .7407068  | 0.789 |
| esci venl | .8293866        | .3767247  | .5811644          | .2369215  | .2482222            | .4445195  | 0.577 |
| fluo fluv | -.0416727       | 1.046043  | .1711334          | .2135561  | -.2128061           | 1.067619  | 0.842 |
| fluo miln | -.4566506       | .3845329  | -.001843          | .2460835  | -.4548076           | .4565038  | 0.319 |
| fluo mirt | .0564188        | .3332664  | .2263635          | .1907598  | -.1699447           | .3846514  | 0.659 |
| fluo nefa | .1851866        | .6155243  | .4474093          | .3483146  | -.2622226           | .7072437  | 0.711 |
| fluo paro | -.0722141       | .2249153  | .2756809          | .1383221  | -.347895            | .2641764  | 0.188 |
| fluo rebo | .2278386        | .446757   | 1.168849          | .3729275  | -.9410108           | .5816663  | 0.106 |
| fluo sert | -.3597736       | .3026713  | -.0827884         | .1999158  | -.2769852           | .3620075  | 0.444 |
| fluo traz | .0803763        | .4862792  | .3661402          | .275688   | -.2857639           | .5589255  | 0.609 |
| fluo venl | .5364349        | .2017689  | .4366562          | .1697112  | .0997787            | .2658142  | 0.707 |
| fluv miln | -.8220612       | .5841142  | -.1684841         | .2884123  | -.6535772           | .6510852  | 0.315 |
| fluv mirt | .5114504        | .3760972  | -.2259915         | .2670842  | .7374419            | .4612917  | 0.110 |
| fluv paro | -.3844132       | .5626446  | .0781584          | .2191207  | -.4625715           | .604305   | 0.444 |
| fluv sert | -.8418464       | .8098143  | -.2818538         | .2460689  | -.5599927           | .8464093  | 0.508 |
| miln paro | .0940082        | .2654121  | .5627967          | .2845691  | -.4687885           | .3892262  | 0.228 |
| mirt paro | .3585103        | .2705784  | -.1929263         | .1978386  | .5514365            | .3342919  | 0.099 |
| mirt sert | -1.497602       | .5478545  | -.1739024         | .2124937  | -1.323699           | .5876208  | 0.024 |
| mirt traz | .9473778        | .8792269  | .0284872          | .2793004  | .9188906            | .9225231  | 0.319 |
| mirt venl | .3734289        | .277695   | .2460855          | .2132989  | .1273434            | .3501583  | 0.716 |
| nefa paro | -.3140989       | .4379402  | -.1091499         | .4100725  | -.204949            | .599888   | 0.733 |
| nefa sert | -.5389955       | .5011198  | -.5579279         | .392667   | .0189325            | .6366385  | 0.976 |
| paro rebo | 1.329225        | .4299984  | .0590205          | .3747589  | 1.270205            | .5703887  | 0.026 |
| paro sert | -.6578174       | .5735042  | -.3172846         | .1765423  | -.3405328           | .5982339  | 0.569 |
| paro traz | .354115         | .4303295  | .0159896          | .2822347  | .3381254            | .5138797  | 0.511 |
| paro venl | -.3671985       | .3387162  | .4119245          | .1442397  | -.779123            | .3682331  | 0.034 |
| rebo venl | .0761882        | .6217788  | -.4126537         | .3415725  | .4888419            | .7094227  | 0.491 |
| sert traz | -1.203967       | .8669622  | .6348165          | .2792131  | -1.838783           | .9108145  | 0.044 |
| sert venl | .8204454        | .4443081  | .6094643          | .1985195  | .2109812            | .4866533  | 0.665 |

### 8.3.5.3 Design-by-treatment test

$$\text{chi2}(54) = 80.05$$

$$\text{Prob} > \text{chi2} = 0.0034$$

## 8.4 Comparison-adjusted funnel plots (active vs fluoxetine)

We drew comparison-adjusted funnel plots for all drugs against fluoxetine, because this was the most often studied drugs and has been considered standard SSRI. The comparison-adjusted funnel plots against fluoxetine suggested no funnel plot asymmetry.

### 8.4.1 Response

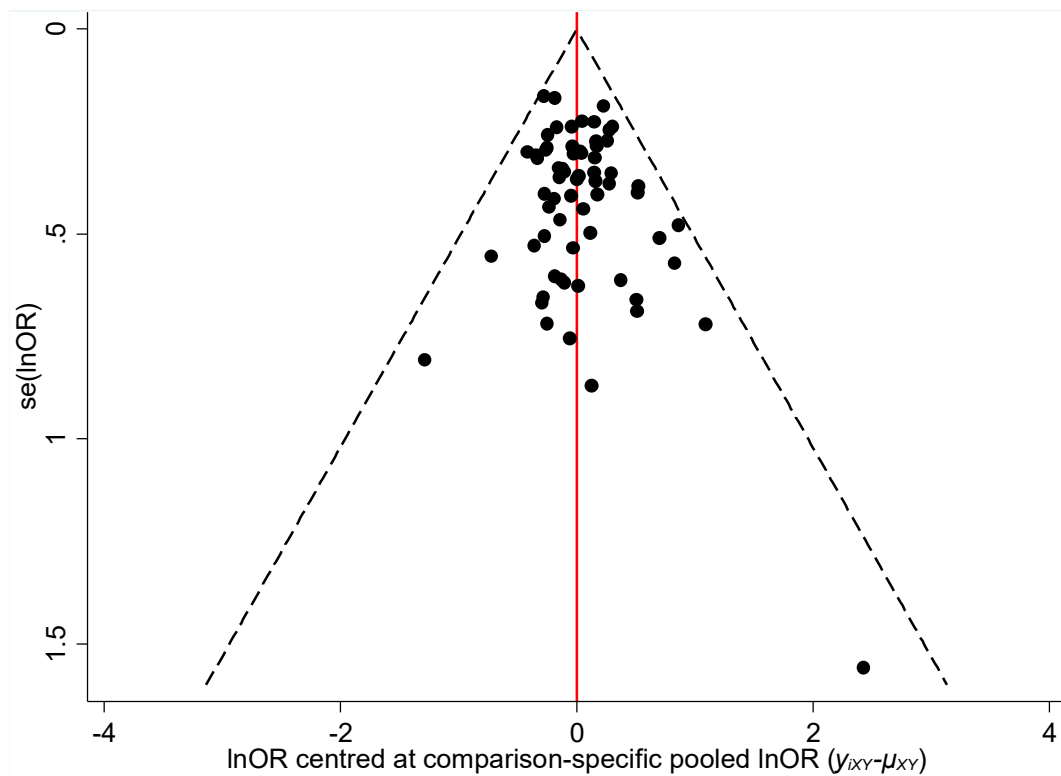

### 8.4.2 Dropouts for any reason

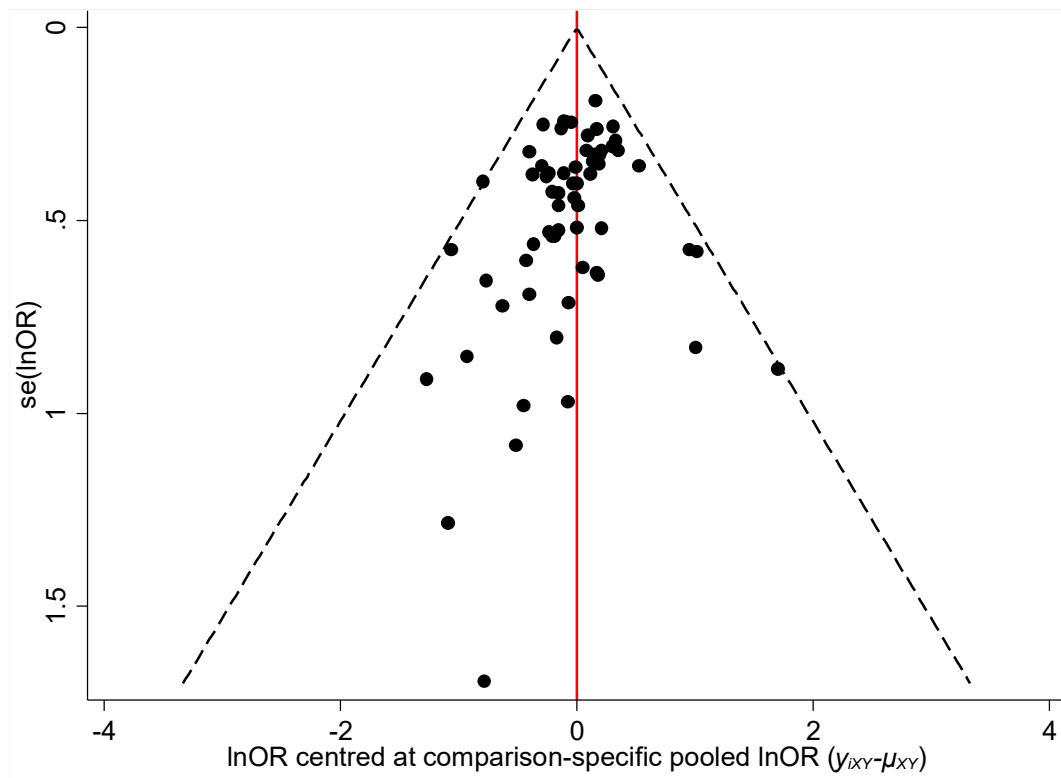

### 8.4.3 Efficacy continuous

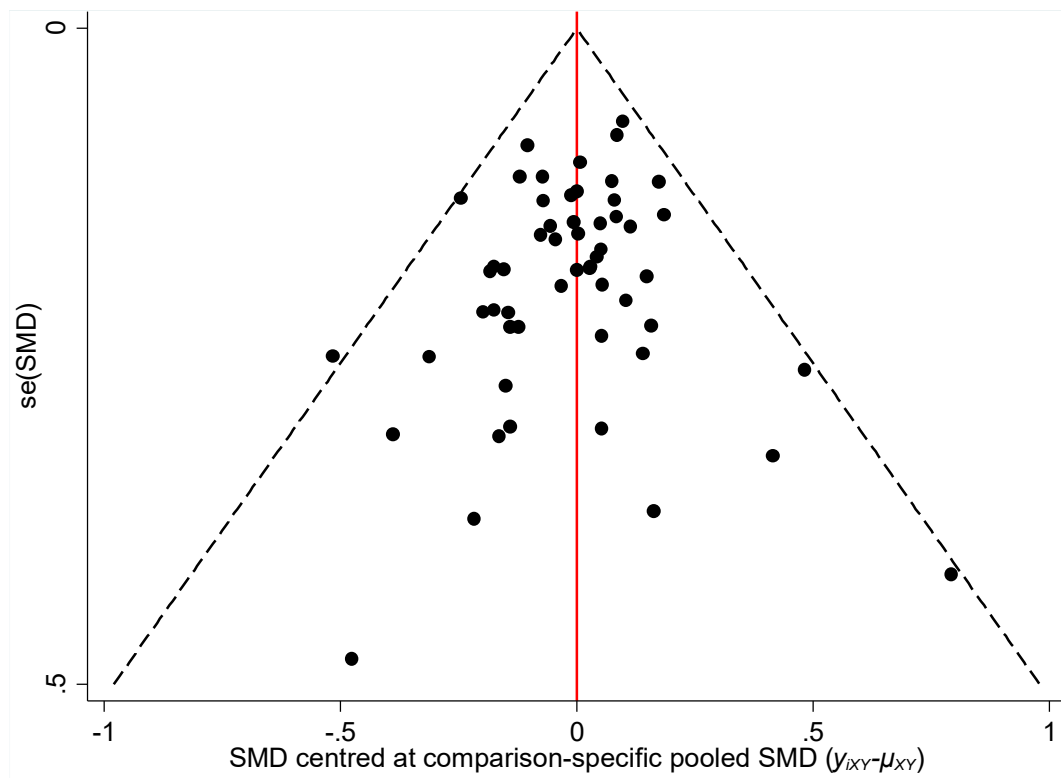

#### 8.4.4 Remission

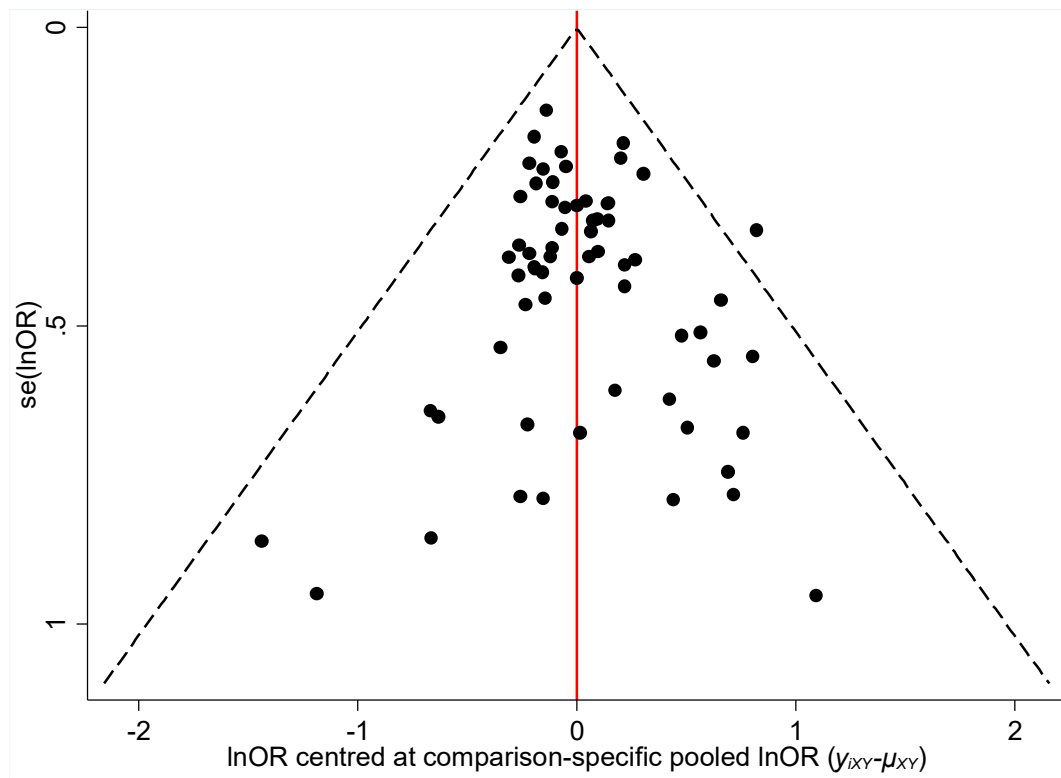

#### 8.4.5 Dropouts due to adverse events

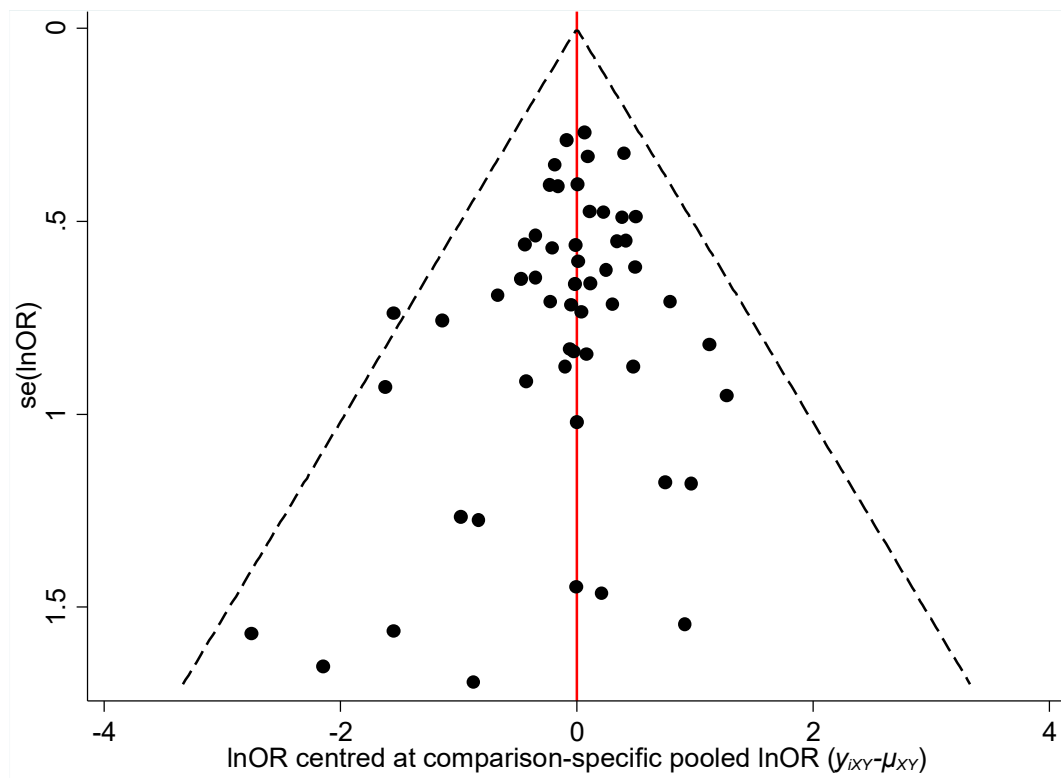

## 8.5 Meta-regressions and sensitivity analyses

### 8.5.1 Changes in heterogeneity after accounting for potential effect modifiers

The following table shows the evidence about the impact of various potential effect modifiers in the relative efficacy of interventions according to the findings of the meta-regressions. We examined only variance and year as these were the most important potential effect modifiers in the entire network (see section 7.6.2). All basic coefficients (i.e. for every comparison between fluoxetine and any other drug) were assumed exchangeable in the models. None of the mean coefficients were significant: small study-effects: B= 2,99 (1.41, 6.81) for response and B= 0.69 (0.33,1.34) for dropouts year: B= 1.00 (0.98,1.02) for response and B=1.00 (0.98,1.03) for dropouts

#### Changes in heterogeneity

| Variable                                       | Heterogeneity standard deviation median and 95% CrI | Relative change in the variance |
|------------------------------------------------|-----------------------------------------------------|---------------------------------|
| <b>Response</b>                                |                                                     |                                 |
| None                                           | 0.16 (0.04,0.25)                                    | -                               |
| Study variance                                 | 0.13 (0.01,0.23)                                    | 19%                             |
| Study year                                     | 0.12 (0.01,0.23)                                    | 25%                             |
| Including all studies with accepted dose range | 0.14 (0.03,0.23)                                    | 13%                             |
| <b>Dropout</b>                                 |                                                     |                                 |
| None                                           | 0.11 (0.01,0.23)                                    | -                               |
| Study variance                                 | 0.10 (0.00,0.23)                                    | 9%                              |
| Study year                                     | 0.10 (0.00,0.23)                                    | 9%                              |
| Including all studies with accepted dose range | 0.14 (0.02,0.25)                                    | 0%                              |

### 8.5.2 Odds-ratios for response and dropout for any reason adjusted for covariates

#### 8.5.2.1 Unadjusted

|               | Response       |        |       |                    |        |       | Dropouts for any reason |        |       |                    |        |       |
|---------------|----------------|--------|-------|--------------------|--------|-------|-------------------------|--------|-------|--------------------|--------|-------|
|               | OR drug vs PLA |        |       | beta of comparison |        |       | OR drug vs PLA          |        |       | beta of comparison |        |       |
|               | 2.5%           | median | 97.5% | 2.5%               | median | 97.5% | 2.5%                    | median | 97.5% | 2.5%               | median | 97.5% |
| Agomelatine   | 1.02           | 1.44   | 2.04  |                    |        |       | 0.36                    | 0.53   | 0.80  |                    |        |       |
| Amitriptyline | 1.07           | 1.50   | 2.07  |                    |        |       | 0.51                    | 0.74   | 1.10  |                    |        |       |
| Bupropion     | 1.05           | 1.65   | 2.60  |                    |        |       | 0.42                    | 0.67   | 1.08  |                    |        |       |
| Citalopram    | 0.92           | 1.27   | 1.75  |                    |        |       | 0.41                    | 0.60   | 0.87  |                    |        |       |
| Clomipramine  | 0.84           | 1.20   | 1.70  |                    |        |       | 0.62                    | 0.94   | 1.41  |                    |        |       |
| Duloxetine    | 0.95           | 1.36   | 1.95  |                    |        |       | 0.57                    | 0.86   | 1.29  |                    |        |       |
| Escitalopram  | 1.14           | 1.60   | 2.23  |                    |        |       | 0.37                    | 0.55   | 0.81  |                    |        |       |
| Fluoxetine    | 0.88           | 1.20   | 1.62  |                    |        |       | 0.44                    | 0.63   | 0.90  |                    |        |       |

|              |      |      |      |      |      |      |
|--------------|------|------|------|------|------|------|
| Fluvoxamine  | 0.83 | 1.20 | 1.71 | 0.51 | 0.77 | 1.17 |
| Milnacipran  | 0.92 | 1.35 | 1.95 | 0.45 | 0.67 | 1.03 |
| Mirtazapine  | 1.09 | 1.54 | 2.17 | 0.45 | 0.66 | 0.99 |
| Nefazodone   | 0.77 | 1.25 | 2.01 | 0.43 | 0.75 | 1.32 |
| Paroxetine   | 1.05 | 1.43 | 1.94 | 0.46 | 0.66 | 0.94 |
| Sertraline   | 0.96 | 1.34 | 1.85 | 0.43 | 0.62 | 0.92 |
| Trazodone    | 0.72 | 1.06 | 1.56 | 0.50 | 0.78 | 1.23 |
| Venlafaxine  | 1.04 | 1.42 | 1.94 | 0.50 | 0.73 | 1.06 |
| Vortioxetine | 1.09 | 1.98 | 3.59 | 0.23 | 0.43 | 0.81 |

### 8.5.2.2 Adjusted for small-study effects

|               | Response       |        |       |                    |        |       | Dropouts for any reason |        |       |                    |        |       |
|---------------|----------------|--------|-------|--------------------|--------|-------|-------------------------|--------|-------|--------------------|--------|-------|
|               | OR drug vs PLA |        |       | beta of comparison |        |       | OR drug vs PLA          |        |       | beta of comparison |        |       |
|               | 2.5%           | median | 97.5% | 2.5%               | median | 97.5% | 2.5%                    | median | 97.5% | 2.5%               | median | 97.5% |
| Agomelatine   | 1.09           | 1.53   | 2.11  | 0.53               | 2.91   | 16.25 | 0.35                    | 0.52   | 0.77  | 0.18               | 0.75   | 5.54  |
| Amitriptyline | 1.17           | 1.62   | 2.23  | 0.85               | 2.41   | 5.35  | 0.49                    | 0.71   | 1.02  | 0.29               | 0.64   | 1.28  |
| Bupropion     | 1.12           | 1.73   | 2.65  | 0.59               | 2.93   | 15.27 | 0.41                    | 0.65   | 1.05  | 0.18               | 0.74   | 4.49  |
| Citalopram    | 0.98           | 1.34   | 1.82  | 0.60               | 2.97   | 16.68 | 0.40                    | 0.58   | 0.83  | 0.10               | 0.65   | 2.61  |
| Clomipramine  | 0.92           | 1.30   | 1.80  | 1.10               | 3.08   | 10.46 | 0.61                    | 0.91   | 1.35  | 0.17               | 0.72   | 3.35  |
| Duloxetine    | 1.00           | 1.42   | 2.00  | 0.55               | 2.96   | 18.63 | 0.56                    | 0.84   | 1.25  | 0.11               | 0.70   | 3.72  |
| Escitalopram  | 1.23           | 1.70   | 2.33  | 0.85               | 3.18   | 22.33 | 0.35                    | 0.53   | 0.78  | 0.34               | 0.82   | 2.70  |
| Fluoxetine    | 0.97           | 1.30   | 1.75  | -                  | -      | -     | 0.42                    | 0.60   | 0.85  | -                  | -      | -     |
| Fluvoxamine   | 0.86           | 1.23   | 1.74  | 0.62               | 2.90   | 13.72 | 0.51                    | 0.76   | 1.14  | 0.13               | 0.66   | 2.42  |
| Milnacipran   | 0.97           | 1.39   | 1.97  | 0.27               | 2.58   | 9.48  | 0.44                    | 0.66   | 0.99  | 0.14               | 0.71   | 3.59  |
| Mirtazapine   | 1.09           | 1.52   | 2.10  | 1.66               | 3.77   | 19.26 | 0.45                    | 0.66   | 1.00  | 0.16               | 0.60   | 1.33  |
| Nefazodone    | 0.74           | 1.21   | 1.91  | 0.62               | 2.67   | 8.58  | 0.41                    | 0.73   | 1.29  | 0.42               | 1.00   | 4.46  |
| Paroxetine    | 1.09           | 1.47   | 1.96  | 0.95               | 3.00   | 11.36 | 0.45                    | 0.65   | 0.92  | 0.13               | 0.59   | 1.53  |
| Sertraline    | 0.99           | 1.37   | 1.86  | 1.38               | 3.86   | 45.74 | 0.43                    | 0.62   | 0.91  | 0.07               | 0.57   | 1.63  |
| Trazodone     | 0.71           | 1.04   | 1.52  | 0.91               | 2.75   | 7.66  | 0.48                    | 0.76   | 1.22  | 0.41               | 0.93   | 3.38  |
| Venlafaxine   | 1.07           | 1.45   | 1.96  | 0.86               | 2.73   | 7.85  | 0.50                    | 0.72   | 1.04  | 0.14               | 0.57   | 1.37  |
| Vortioxetine  | 1.15           | 2.01   | 3.50  | 0.56               | 2.96   | 18.32 | 0.23                    | 0.42   | 0.79  | 0.11               | 0.70   | 3.72  |

### 8.5.2.3 Adjusted for year of studies

|               | Response       |        |       |                    |        |       | Dropouts for any reason |        |       |                    |        |       |
|---------------|----------------|--------|-------|--------------------|--------|-------|-------------------------|--------|-------|--------------------|--------|-------|
|               | OR drug vs PLA |        |       | beta of comparison |        |       | OR drug vs PLA          |        |       | beta of comparison |        |       |
|               | 2.5%           | median | 97.5% | 2.5%               | median | 97.5% | 2.5%                    | median | 97.5% | 2.5%               | median | 97.5% |
| Agomelatine   | 0.82           | 1.35   | 2.18  | 0.63               | 0.98   | 1.42  | 0.32                    | 0.54   | 0.86  | 0.65               | 0.98   | 1.41  |
| Amitriptyline | 1.00           | 1.44   | 2.06  | 0.75               | 1.00   | 1.29  | 0.54                    | 0.79   | 1.18  | 0.67               | 0.91   | 1.20  |
| Bupropion     | 0.95           | 1.51   | 2.36  | 0.73               | 1.05   | 1.53  | 0.44                    | 0.70   | 1.18  | 0.78               | 1.05   | 1.52  |

|              |      |      |      |      |      |      |      |      |      |      |      |      |
|--------------|------|------|------|------|------|------|------|------|------|------|------|------|
| Citalopram   | 0.79 | 1.14 | 1.61 | 0.64 | 0.87 | 1.16 | 0.43 | 0.62 | 0.92 | 0.80 | 1.08 | 1.58 |
| Clomipramine | 0.79 | 1.18 | 1.74 | 0.65 | 0.97 | 1.33 | 0.61 | 0.95 | 1.50 | 0.68 | 0.99 | 1.43 |
| Duloxetine   | 0.56 | 1.08 | 1.77 | 0.42 | 0.82 | 1.21 | 0.62 | 1.03 | 2.34 | 0.82 | 1.17 | 2.60 |
| Escitalopram | 1.01 | 1.58 | 2.40 | 0.67 | 1.02 | 1.49 | 0.39 | 0.60 | 1.07 | 0.78 | 1.09 | 1.97 |
| Fluoxetine   | 0.83 | 1.15 | 1.58 | -    | -    | -    | 0.46 | 0.64 | 0.92 | -    | -    | -    |
| Fluvoxamine  | 0.79 | 1.15 | 1.65 | 0.58 | 0.88 | 1.22 | 0.53 | 0.79 | 1.21 | 0.79 | 1.08 | 1.74 |
| Milnacipran  | 0.87 | 1.28 | 1.85 | 0.71 | 0.95 | 1.23 | 0.46 | 0.69 | 1.06 | 0.75 | 0.99 | 1.33 |
| Mirtazapine  | 0.99 | 1.43 | 2.05 | 0.63 | 0.95 | 1.31 | 0.47 | 0.70 | 1.07 | 0.78 | 1.08 | 1.71 |
| Nefazodone   | 0.75 | 1.20 | 1.93 | 0.66 | 1.05 | 1.84 | 0.45 | 0.76 | 1.35 | 0.61 | 0.99 | 1.59 |
| Paroxetine   | 1.00 | 1.38 | 1.88 | 0.79 | 0.98 | 1.21 | 0.48 | 0.66 | 0.98 | 0.78 | 0.98 | 1.23 |
| Sertraline   | 0.93 | 1.31 | 1.82 | 0.82 | 1.10 | 1.49 | 0.44 | 0.63 | 0.93 | 0.66 | 0.94 | 1.27 |
| Trazodone    | 0.67 | 1.01 | 1.50 | 0.69 | 0.99 | 1.35 | 0.51 | 0.79 | 1.27 | 0.74 | 1.02 | 1.47 |
| Venlafaxine  | 1.10 | 1.55 | 2.14 | 1.01 | 1.38 | 1.91 | 0.49 | 0.70 | 1.03 | 0.59 | 0.90 | 1.21 |
| Vortioxetine | 0.45 | 1.34 | 3.27 | 0.57 | 1.00 | 1.63 | 0.22 | 0.49 | 1.60 | 0.65 | 1.01 | 1.66 |

## 9 GRADE for the primary outcomes

### 9.1 Response

#### 9.1.1 Summary of study limitations of the included studies

The colours in the circles indicate the percentage of low RoB studies [green], moderate RoB studies [yellow] and high RoB studies [red] involving each antidepressant.

The colours of the line then indicate the summative RoB assessment of each comparison based on the above information – low RoB comparison [green] and moderate RoB comparison [yellow]. There was no comparison which was judged to be at high RoB.

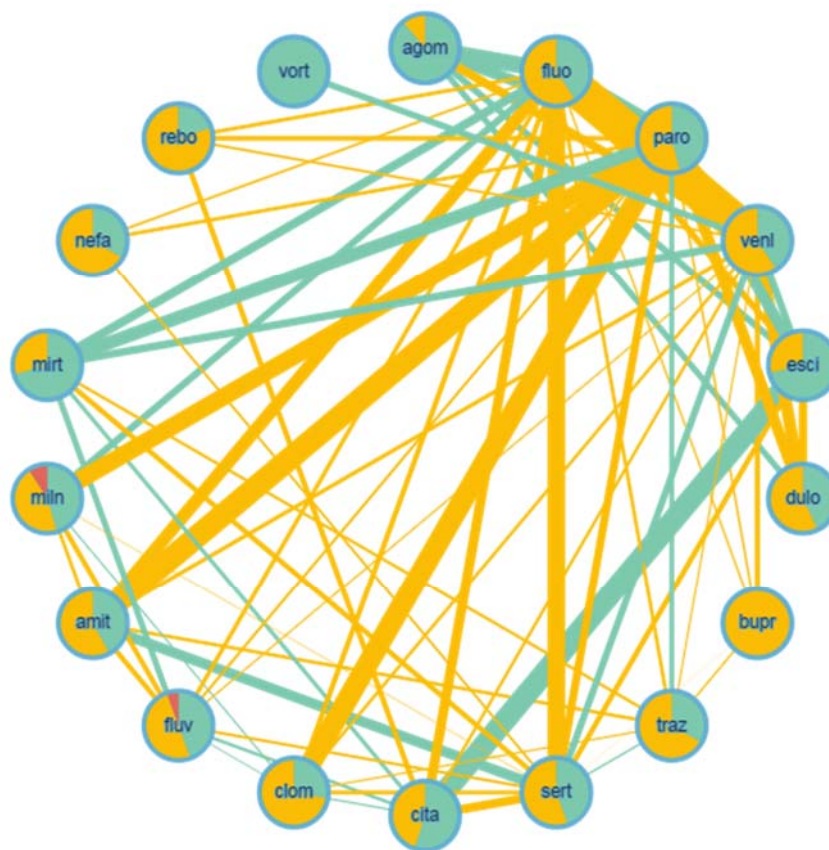

#### 9.1.2 Contribution of low or moderate RoB comparisons to each network estimate

Based on the above assessment of RoB for each comparison and the contribution matrix detailing contribution of each direct comparison to all network estimates, the following bar graphs show the percentage of low or moderate RoB contributions for each network estimate.



The judgements about study limitations in each direct comparison is shown at the beginning of the graph. Each bar corresponds to a NMA relative treatment effect and shows how much information comes from comparisons at low risk of bias [green] or moderate risk of bias [yellow].

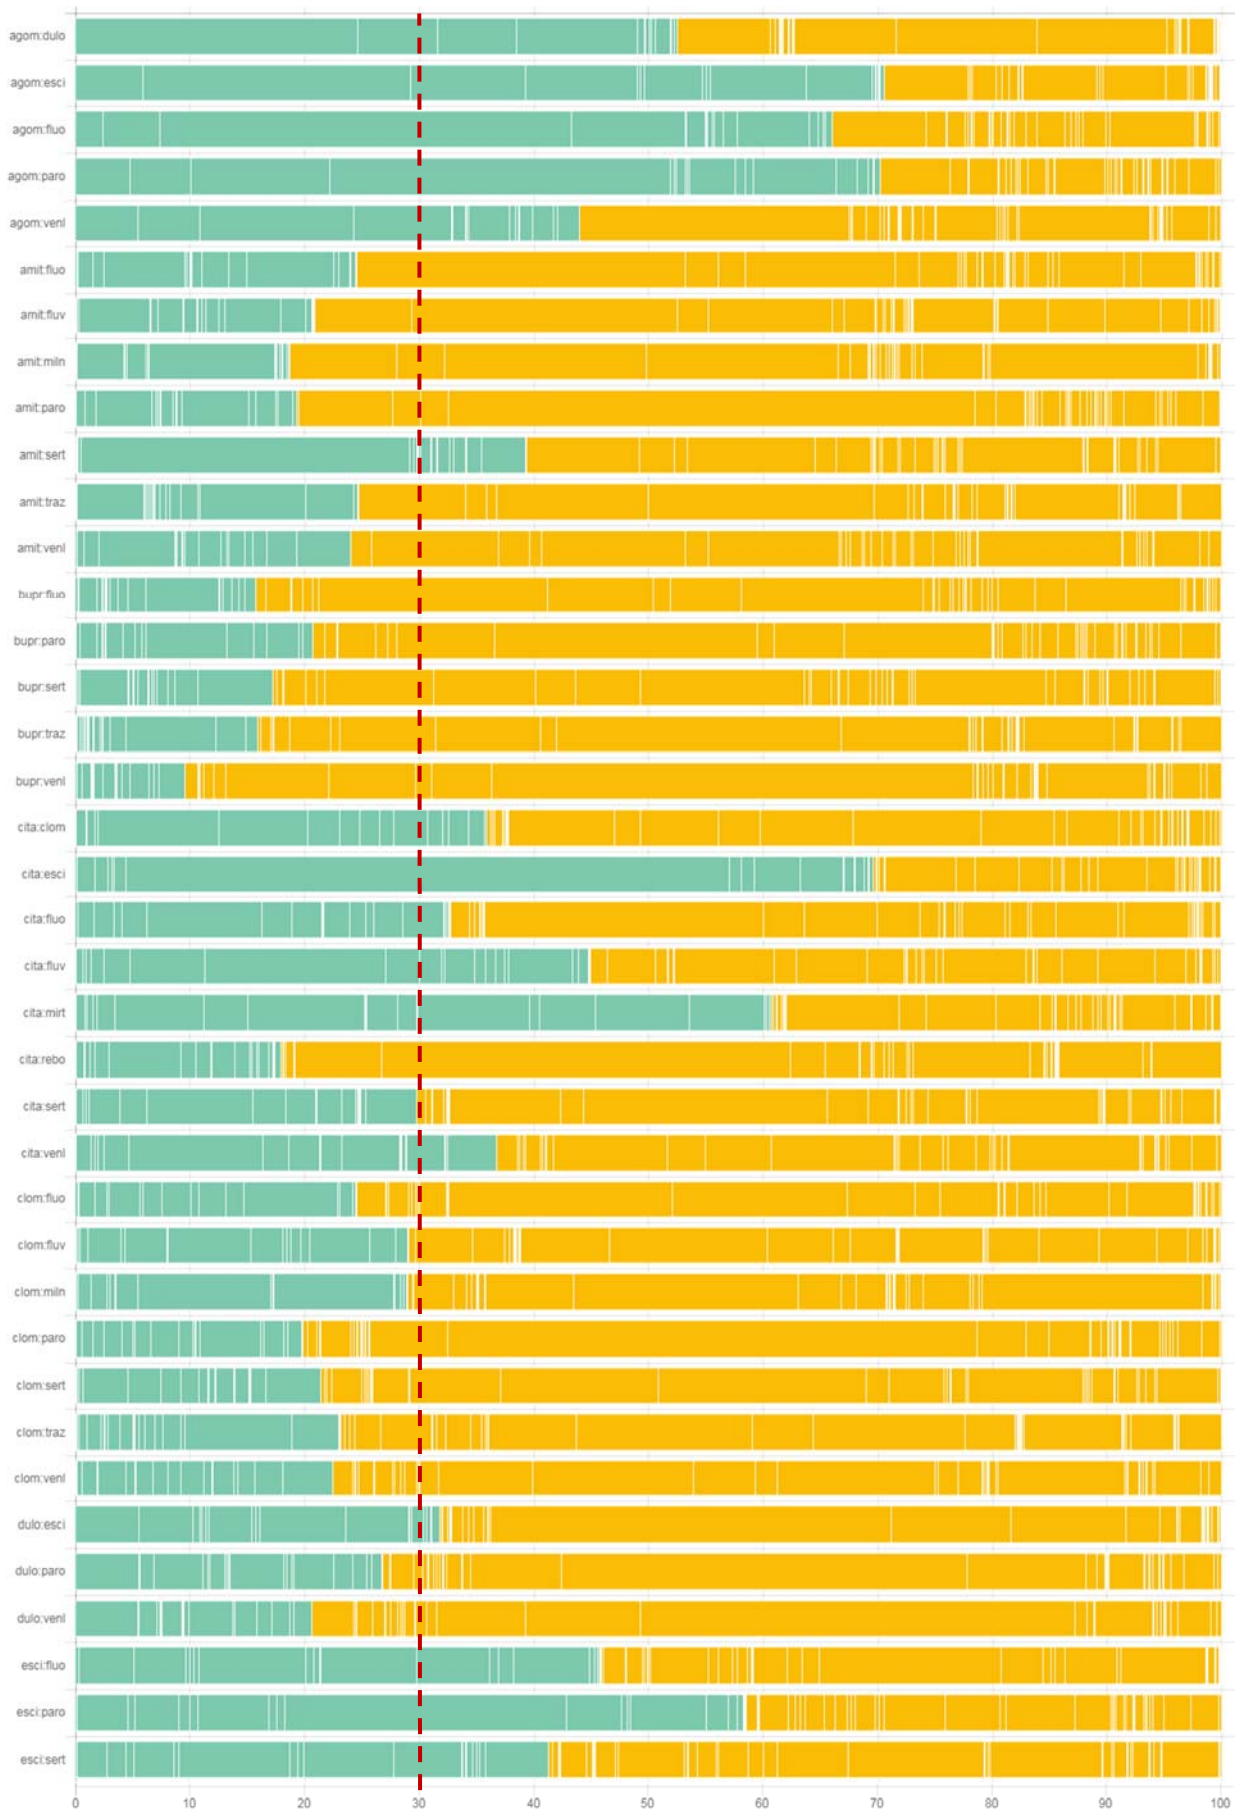

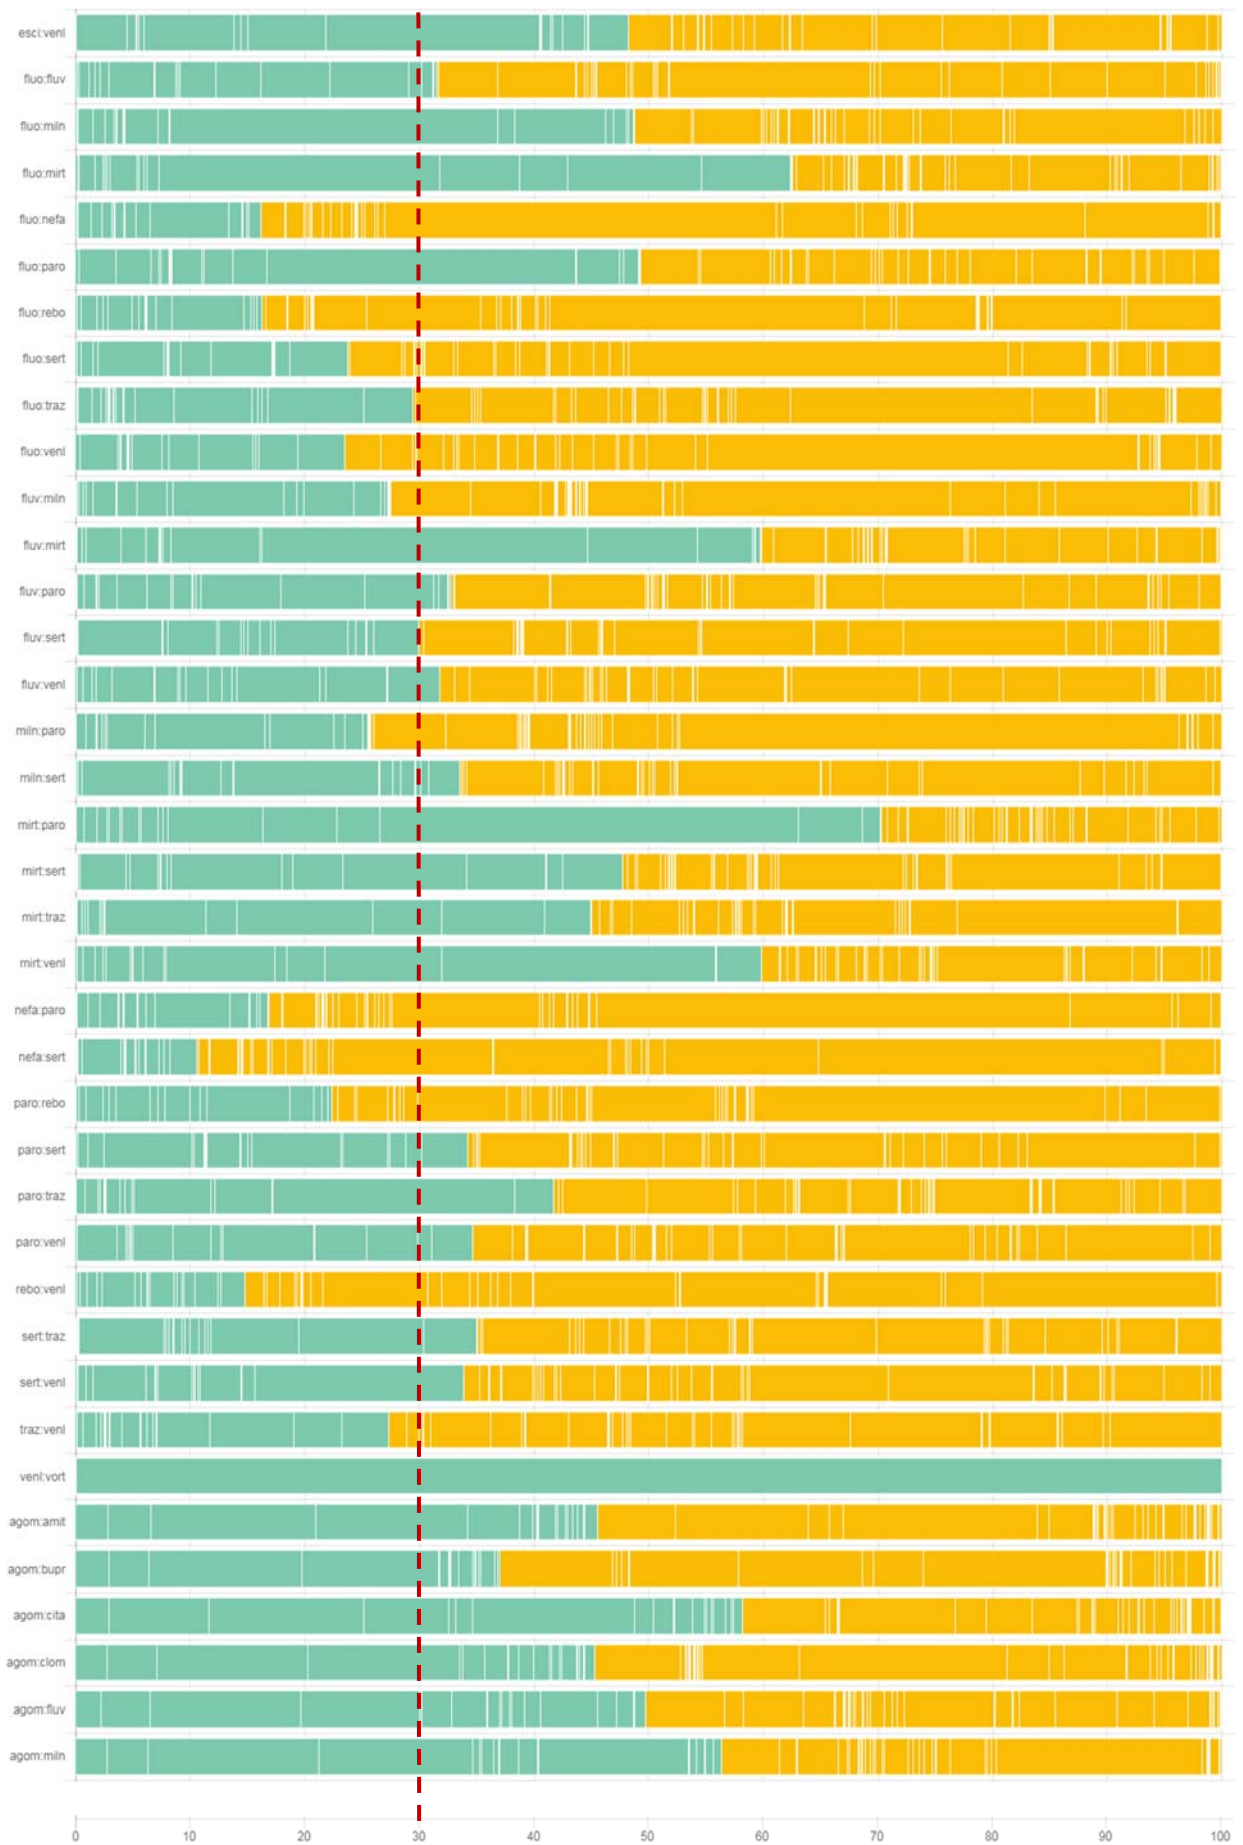

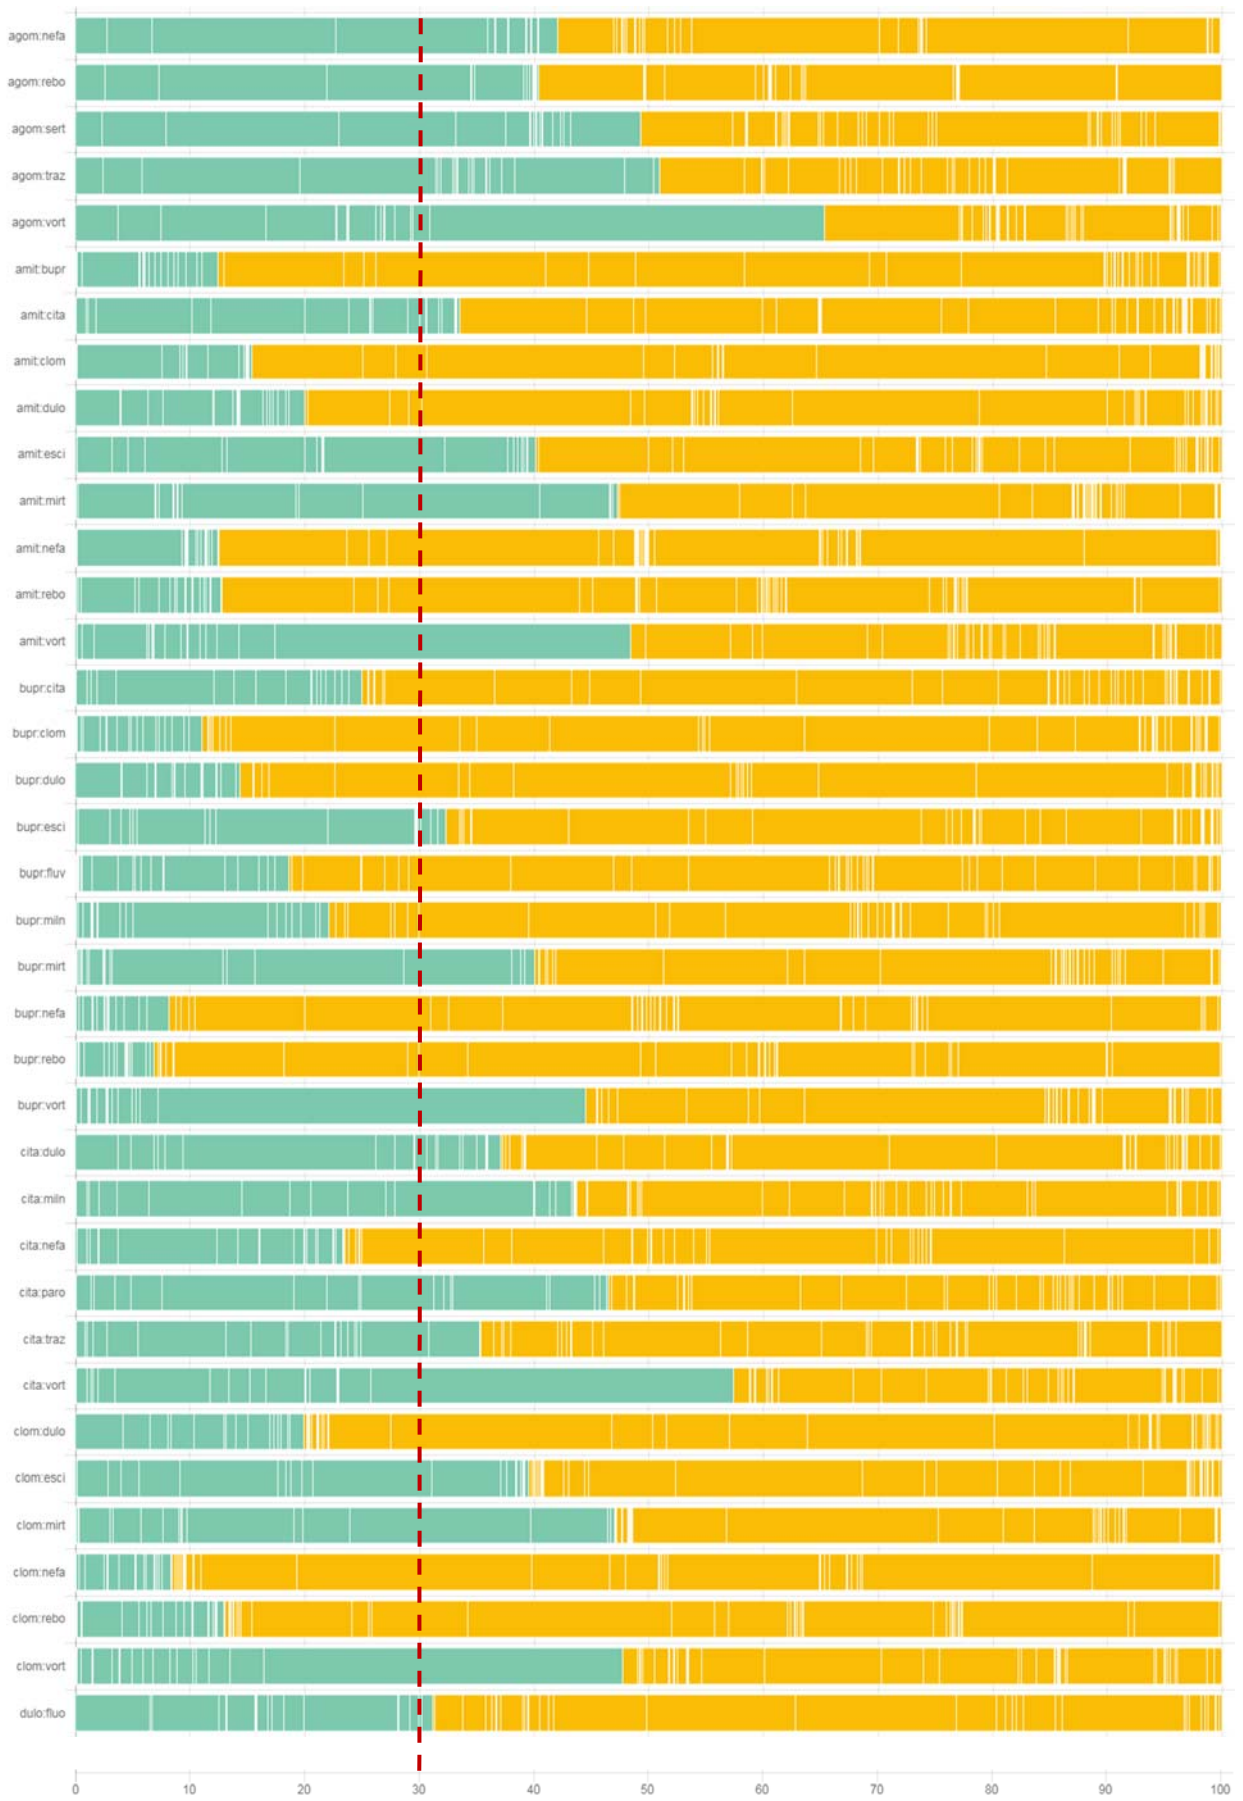

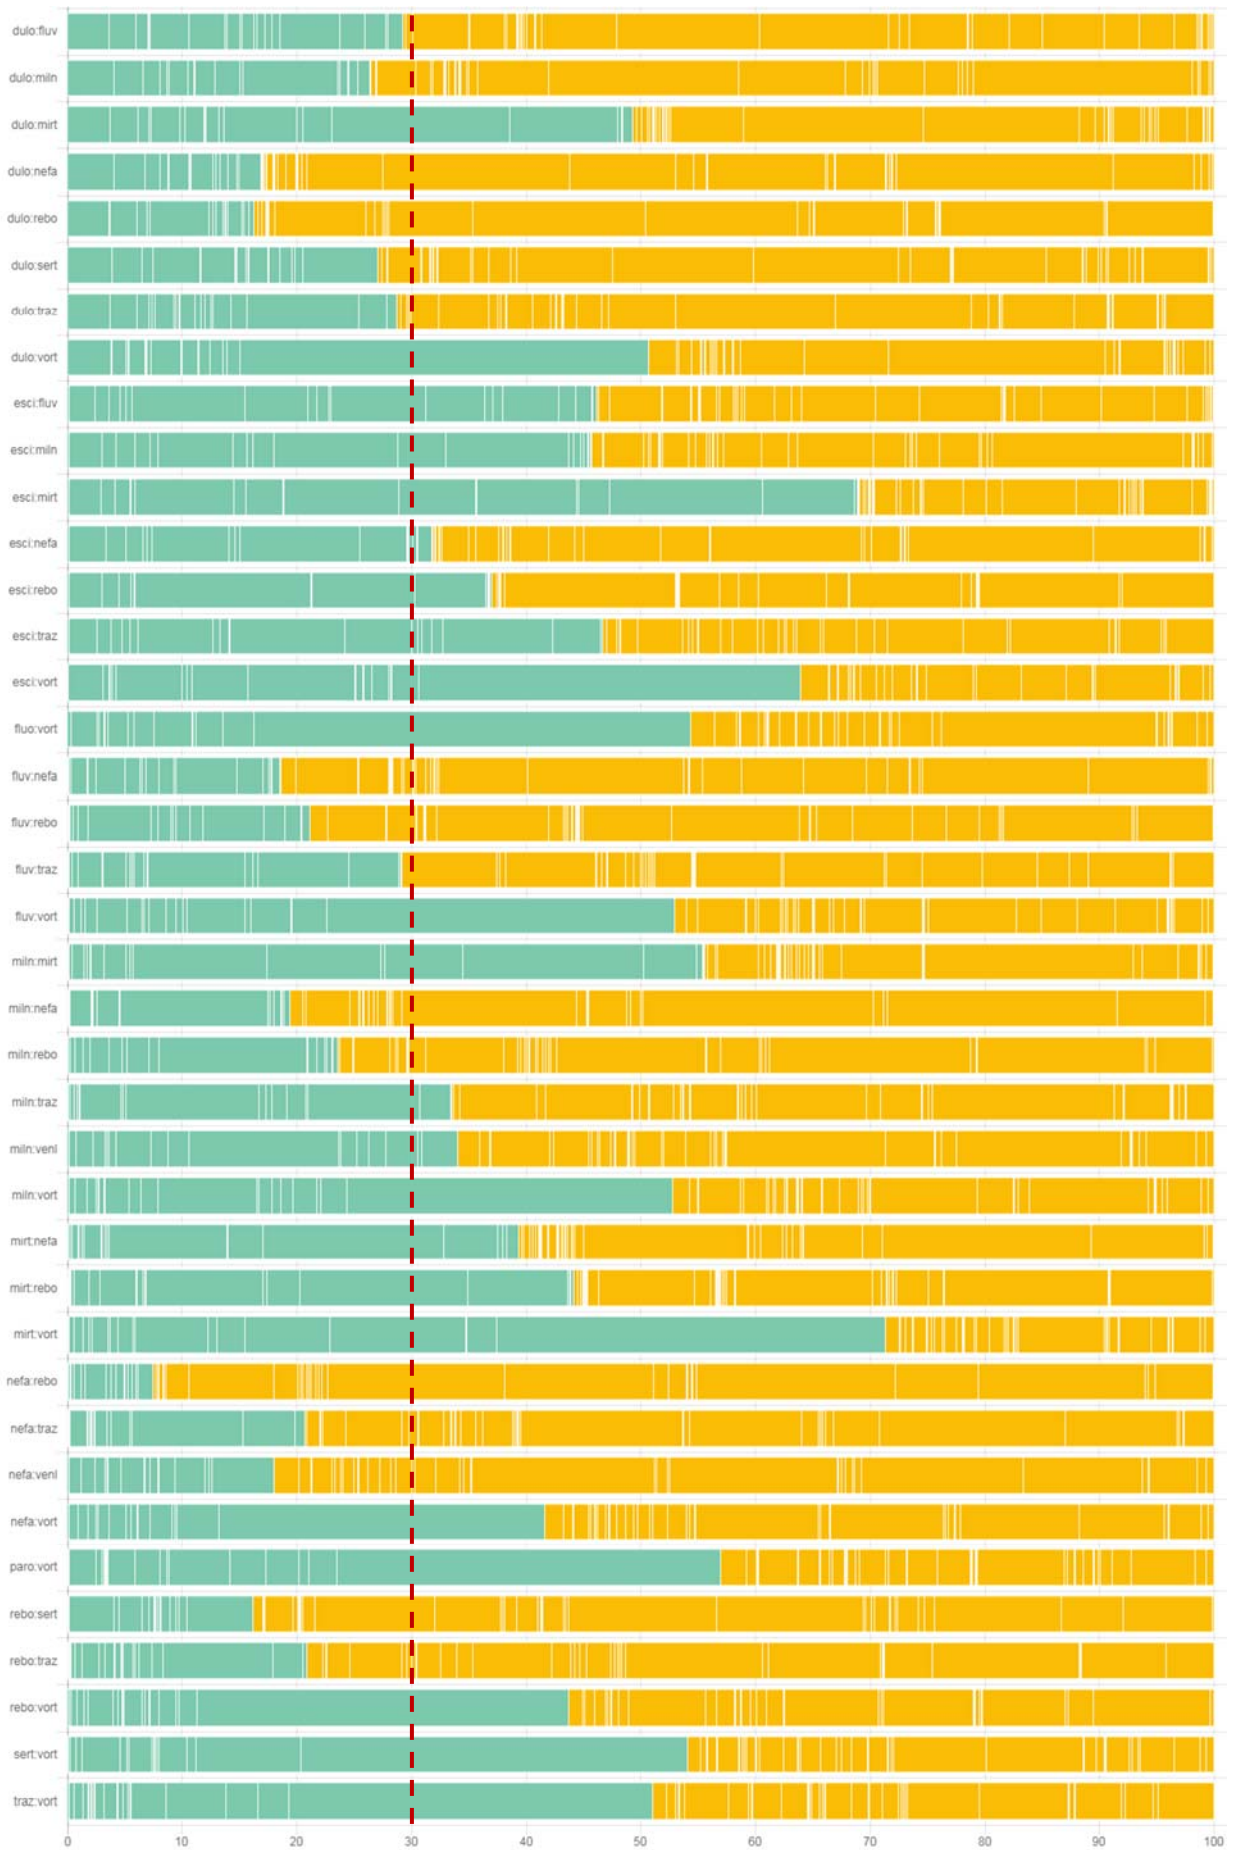

### 9.1.3 Table of reasons for downgrading

Based on all the above information, we GRADEd each network estimate according to the following criteria.

- (1) **Study limitations:** We downgraded by one level when the contributions from low RoB comparisons were less than 30% and contributions from moderate RoB comparisons were 70% or greater.
- (2) **Imprecision:** We considered a clinically meaningful threshold for OR to be 0.80 or 1.25 and downgraded the estimate if the OR point estimate is 1 or more and the lower limit of its CrI is below 0.80; or if the OR point estimate is less than 1 and the upper limit of its CrI is above 1.25.
- (3) **Inconsistency:** We rated two concepts, heterogeneity and incoherence (inconsistency), in this domain. For heterogeneity, we looked at the common tau and found that it is low compared to the expected value as reported in the literature (Turner RM et al (2012) *Int J Epidemiol*, 41, 818-827), so we did not downgrade any network estimate for heterogeneity. For inconsistency, we looked at the results of side splitting (8.3.1.2) and we downgraded the comparisons with important inconsistency ( $p < 0.10$ ), where we have not downgraded for imprecision (we did not downgrade the same network estimate for both imprecision and inconsistency).
- (4) **Indirectness:** We have assured transitivity in our network by limiting the included studies to non-psychotic non-refractory unipolar major depression, because bipolarity, psychotic features, subthreshold depression and treatment refractoriness are established treatment modifiers for antidepressants. We further ran various meta-regressions depression severity, and except for placebo-controlled trials, assured that they did not violate transitivity of the network. However, we downgraded singly-connected nodes for indirectness because evaluation of transitivity for such nodes is unclear.
- (5) **Publication bias:** The comparison-adjusted funnel plot (8.4.1) did not suggest presence of overall publication bias in comparison with the old, standard drug fluoxetine. Further, there was no network estimate for which the meta-regression for small-study effects suggested the statistically significant influence of small-study effects (8.5.2.2). We managed to retrieve supplementary and unpublished information included in the available systematic reviews and network meta-analyses, and we are confident that we have all available information that is possible to capture from clinical trial registries, regulatory agencies' repositories and drug companies' websites (particularly for the newest and most recently marketed antidepressants). However, we cannot completely rule out the possibility that some studies are still missing. Considering that the field of antidepressant trials in the past has been prone to publication bias, the review team decided by default to downgrade all the included studies for potential publication bias by one level.

|              | Study limitations                                                 | Imprecision                                                 | Inconsistency | Indirectness                                                                                                                       | Publication bias | GRADE    |
|--------------|-------------------------------------------------------------------|-------------------------------------------------------------|---------------|------------------------------------------------------------------------------------------------------------------------------------|------------------|----------|
| Agom vs Amit | No downgrade                                                      | No downgrade                                                | No downgrade  | No downgrade                                                                                                                       | Downgrade        | MODERATE |
| Agom vs Bupr | No downgrade                                                      | Downgrade because point estimate <1.0 but upper limit >1.25 | No downgrade  | No downgrade                                                                                                                       | Downgrade        | LOW      |
| Agom vs Cita | No downgrade                                                      | No downgrade                                                | No downgrade  | No downgrade                                                                                                                       | Downgrade        | MODERATE |
| Agom vs Clom | No downgrade                                                      | No downgrade                                                | No downgrade  | No downgrade                                                                                                                       | Downgrade        | MODERATE |
| Agom vs Dulo | No downgrade                                                      | No downgrade                                                | No downgrade  | No downgrade                                                                                                                       | Downgrade        | MODERATE |
| Agom vs Esci | No downgrade                                                      | No downgrade                                                | No downgrade  | No downgrade                                                                                                                       | Downgrade        | MODERATE |
| Agom vs Fluo | No downgrade                                                      | No downgrade                                                | No downgrade  | No downgrade                                                                                                                       | Downgrade        | MODERATE |
| Agom vs Fluv | No downgrade                                                      | No downgrade                                                | No downgrade  | No downgrade                                                                                                                       | Downgrade        | MODERATE |
| Agom vs Miln | No downgrade                                                      | No downgrade                                                | No downgrade  | No downgrade                                                                                                                       | Downgrade        | MODERATE |
| Agom vs Mirt | No downgrade                                                      | No downgrade                                                | No downgrade  | No downgrade                                                                                                                       | Downgrade        | MODERATE |
| Agom vs Nefa | No downgrade                                                      | Downgrade because point estimate >1.0 but lower limit <0.80 | No downgrade  | No downgrade                                                                                                                       | Downgrade        | LOW      |
| Agom vs Paro | No downgrade                                                      | No downgrade                                                | No downgrade  | No downgrade                                                                                                                       | Downgrade        | MODERATE |
| Agom vs Rebo | No downgrade                                                      | No downgrade                                                | No downgrade  | No downgrade                                                                                                                       | Downgrade        | MODERATE |
| Agom vs Sert | No downgrade                                                      | No downgrade                                                | No downgrade  | No downgrade                                                                                                                       | Downgrade        | MODERATE |
| Agom vs Traz | No downgrade                                                      | No downgrade                                                | No downgrade  | No downgrade                                                                                                                       | Downgrade        | MODERATE |
| Agom vs Venl | No downgrade                                                      | No downgrade                                                | No downgrade  | No downgrade                                                                                                                       | Downgrade        | MODERATE |
| Agom vs Vort | No downgrade                                                      | Downgrade because point estimate <1.0 but upper limit >1.25 | No downgrade  | Downgrade because of concerns about transitivity. Vort is a singly connected node and hence evaluation of transitivity is unclear. | Downgrade        | VERY LOW |
| Amit vs Bupr | Downgrade because >70% contribution from moderate RoB comparisons | Downgrade because point estimate <1.0 but upper limit >1.25 | No downgrade  | No downgrade                                                                                                                       | Downgrade        | VERY LOW |
| Amit vs Cita | No downgrade                                                      | No downgrade                                                | No downgrade  | No downgrade                                                                                                                       | Downgrade        | MODERATE |
| Amit vs Clom | Downgrade because >70% contribution from moderate RoB comparisons | No downgrade                                                | No downgrade  | No downgrade                                                                                                                       | Downgrade        | LOW      |
| Amit vs Dulo | Downgrade because >70% contribution from moderate RoB comparisons | No downgrade                                                | No downgrade  | No downgrade                                                                                                                       | Downgrade        | LOW      |

|              |                                                                   |                                                             |              |                                                                                                                                    |           |          |
|--------------|-------------------------------------------------------------------|-------------------------------------------------------------|--------------|------------------------------------------------------------------------------------------------------------------------------------|-----------|----------|
| Amit vs Esci | No downgrade                                                      | No downgrade                                                | No downgrade | No downgrade                                                                                                                       | Downgrade | MODERATE |
| Amit vs Fluo | Downgrade because >70% contribution from moderate RoB comparisons | No downgrade                                                | No downgrade | No downgrade                                                                                                                       | Downgrade | LOW      |
| Amit vs Fluv | Downgrade because >70% contribution from moderate RoB comparisons | No downgrade                                                | No downgrade | No downgrade                                                                                                                       | Downgrade | LOW      |
| Amit vs Miln | Downgrade because >70% contribution from moderate RoB comparisons | No downgrade                                                | No downgrade | No downgrade                                                                                                                       | Downgrade | LOW      |
| Amit vs Mirt | No downgrade                                                      | No downgrade                                                | No downgrade | No downgrade                                                                                                                       | Downgrade | MODERATE |
| Amit vs Nefa | Downgrade because >70% contribution from moderate RoB comparisons | No downgrade                                                | No downgrade | No downgrade                                                                                                                       | Downgrade | LOW      |
| Amit vs Paro | Downgrade because >70% contribution from moderate RoB comparisons | No downgrade                                                | No downgrade | No downgrade                                                                                                                       | Downgrade | LOW      |
| Amit vs Rebo | Downgrade because >70% contribution from moderate RoB comparisons | No downgrade                                                | No downgrade | No downgrade                                                                                                                       | Downgrade | LOW      |
| Amit vs Sert | No downgrade                                                      | No downgrade                                                | No downgrade | No downgrade                                                                                                                       | Downgrade | MODERATE |
| Amit vs Traz | Downgrade because >70% contribution from moderate RoB comparisons | No downgrade                                                | No downgrade | No downgrade                                                                                                                       | Downgrade | LOW      |
| Amit vs Venl | Downgrade because >70% contribution from moderate RoB comparisons | No downgrade                                                | No downgrade | No downgrade                                                                                                                       | Downgrade | LOW      |
| Amit vs Vort | No downgrade                                                      | Downgrade because point estimate <1.0 but upper limit >1.25 | No downgrade | Downgrade because of concerns about transitivity. Vort is a singly connected node and hence evaluation of transitivity is unclear. | Downgrade | VERY LOW |



|                     |                                                                   |                                                             |              |              |           |          |
|---------------------|-------------------------------------------------------------------|-------------------------------------------------------------|--------------|--------------|-----------|----------|
| <b>Bupr vs Cita</b> | Downgrade because >70% contribution from moderate RoB comparisons | No downgrade                                                | No downgrade | No downgrade | Downgrade | LOW      |
| <b>Bupr vs Clom</b> | Downgrade because >70% contribution from moderate RoB comparisons | No downgrade                                                | No downgrade | No downgrade | Downgrade | LOW      |
| <b>Bupr vs Dulo</b> | Downgrade because >70% contribution from moderate RoB comparisons | No downgrade                                                | No downgrade | No downgrade | Downgrade | LOW      |
| <b>Bupr vs Esci</b> | No downgrade                                                      | Downgrade because point estimate >1.0 but lower limit <0.80 | No downgrade | No downgrade | Downgrade | LOW      |
| <b>Bupr vs Fluo</b> | Downgrade because >70% contribution from moderate RoB comparisons | No downgrade                                                | No downgrade | No downgrade | Downgrade | LOW      |
| <b>Bupr vs Fluv</b> | Downgrade because >70% contribution from moderate RoB comparisons | No downgrade                                                | No downgrade | No downgrade | Downgrade | LOW      |
| <b>Bupr vs Miln</b> | Downgrade because >70% contribution from moderate RoB comparisons | No downgrade                                                | No downgrade | No downgrade | Downgrade | LOW      |
| <b>Bupr vs Mirt</b> | No downgrade                                                      | Downgrade because point estimate >1.0 but lower limit <0.80 | No downgrade | No downgrade | Downgrade | LOW      |
| <b>Bupr vs Nefa</b> | Downgrade because >70% contribution from moderate RoB comparisons | Downgrade because point estimate >1.0 but lower limit <0.80 | No downgrade | No downgrade | Downgrade | VERY LOW |
| <b>Bupr vs Paro</b> | Downgrade because >70% contribution from moderate RoB comparisons | No downgrade                                                | No downgrade | No downgrade | Downgrade | LOW      |
| <b>Bupr vs Rebo</b> | Downgrade because >70% contribution from moderate RoB comparisons | No downgrade                                                | No downgrade | No downgrade | Downgrade | LOW      |

|                     |                                                                   |                                                             |              |                                                                                                                                    |           |          |
|---------------------|-------------------------------------------------------------------|-------------------------------------------------------------|--------------|------------------------------------------------------------------------------------------------------------------------------------|-----------|----------|
| <b>Bupr vs Sert</b> | Downgrade because >70% contribution from moderate RoB comparisons | No downgrade                                                | No downgrade | No downgrade                                                                                                                       | Downgrade | LOW      |
| <b>Bupr vs Traz</b> | Downgrade because >70% contribution from moderate RoB comparisons | No downgrade                                                | No downgrade | No downgrade                                                                                                                       | Downgrade | LOW      |
| <b>Bupr vs Venl</b> | Downgrade because >70% contribution from moderate RoB comparisons | No downgrade                                                | No downgrade | No downgrade                                                                                                                       | Downgrade | LOW      |
| <b>Bupr vs Vort</b> | No downgrade                                                      | Downgrade because point estimate <1.0 but upper limit >1.25 | No downgrade | Downgrade because of concerns about transitivity. Vort is a singly connected node and hence evaluation of transitivity is unclear. | Downgrade | VERY LOW |
| <b>Cita vs Clom</b> | No downgrade                                                      | No downgrade                                                | No downgrade | No downgrade                                                                                                                       | Downgrade | MODERATE |
| <b>Cita vs Dulo</b> | No downgrade                                                      | No downgrade                                                | No downgrade | No downgrade                                                                                                                       | Downgrade | MODERATE |
| <b>Cita vs Esci</b> | No downgrade                                                      | No downgrade                                                | No downgrade | No downgrade                                                                                                                       | Downgrade | MODERATE |
| <b>Cita vs Fluo</b> | No downgrade                                                      | No downgrade                                                | No downgrade | No downgrade                                                                                                                       | Downgrade | MODERATE |
| <b>Cita vs Fluv</b> | No downgrade                                                      | No downgrade                                                | No downgrade | No downgrade                                                                                                                       | Downgrade | MODERATE |
| <b>Cita vs Miln</b> | No downgrade                                                      | Downgrade because point estimate <1.0 but upper limit >1.25 | No downgrade | No downgrade                                                                                                                       | Downgrade | LOW      |
| <b>Cita vs Mirt</b> | No downgrade                                                      | No downgrade                                                | No downgrade | No downgrade                                                                                                                       | Downgrade | MODERATE |
| <b>Cita vs Nefa</b> | Downgrade because >70% contribution from moderate RoB comparisons | Downgrade because point estimate >1.0 but lower limit <0.80 | No downgrade | No downgrade                                                                                                                       | Downgrade | VERY LOW |
| <b>Cita vs Paro</b> | No downgrade                                                      | No downgrade                                                | No downgrade | No downgrade                                                                                                                       | Downgrade | MODERATE |
| <b>Cita vs Rebo</b> | Downgrade because >70% contribution from moderate RoB comparisons | No downgrade                                                | No downgrade | No downgrade                                                                                                                       | Downgrade | LOW      |
| <b>Cita vs Sert</b> | Downgrade because >70% contribution from moderate RoB comparisons | No downgrade                                                | No downgrade | No downgrade                                                                                                                       | Downgrade | LOW      |
| <b>Cita vs Traz</b> | No downgrade                                                      | No downgrade                                                | No downgrade | No downgrade                                                                                                                       | Downgrade | MODERATE |

|                     |                                                                   |                                                             |                                      |                                                                                                                                    |           |          |
|---------------------|-------------------------------------------------------------------|-------------------------------------------------------------|--------------------------------------|------------------------------------------------------------------------------------------------------------------------------------|-----------|----------|
| <b>Cita vs Venl</b> | No downgrade                                                      | No downgrade                                                | Downgrade for side-splitting p=0.042 | No downgrade                                                                                                                       | Downgrade | LOW      |
| <b>Cita vs Vort</b> | No downgrade                                                      | No downgrade                                                | No downgrade                         | Downgrade because of concerns about transitivity. Vort is a singly connected node and hence evaluation of transitivity is unclear. | Downgrade | LOW      |
| <b>Clom vs Dulo</b> | Downgrade because >70% contribution from moderate RoB comparisons | No downgrade                                                | No downgrade                         | No downgrade                                                                                                                       | Downgrade | LOW      |
| <b>Clom vs Esci</b> | No downgrade                                                      | No downgrade                                                | No downgrade                         | No downgrade                                                                                                                       | Downgrade | MODERATE |
| <b>Clom vs Fluo</b> | Downgrade because >70% contribution from moderate RoB comparisons | No downgrade                                                | Downgrade for side-splitting p=0.020 | No downgrade                                                                                                                       | Downgrade | VERY LOW |
| <b>Clom vs Fluv</b> | Downgrade because >70% contribution from moderate RoB comparisons | Downgrade because point estimate >1.0 but lower limit <0.80 | No downgrade                         | No downgrade                                                                                                                       | Downgrade | VERY LOW |
| <b>Clom vs Miln</b> | Downgrade because >70% contribution from moderate RoB comparisons | No downgrade                                                | No downgrade                         | No downgrade                                                                                                                       | Downgrade | LOW      |
| <b>Clom vs Mirt</b> | No downgrade                                                      | No downgrade                                                | No downgrade                         | No downgrade                                                                                                                       | Downgrade | MODERATE |
| <b>Clom vs Nefa</b> | Downgrade because >70% contribution from moderate RoB comparisons | Downgrade because point estimate <1.0 but upper limit >1.25 | No downgrade                         | No downgrade                                                                                                                       | Downgrade | VERY LOW |
| <b>Clom vs Paro</b> | Downgrade because >70% contribution from moderate RoB comparisons | No downgrade                                                | No downgrade                         | No downgrade                                                                                                                       | Downgrade | LOW      |
| <b>Clom vs Rebo</b> | Downgrade because >70% contribution from moderate RoB comparisons | No downgrade                                                | No downgrade                         | No downgrade                                                                                                                       | Downgrade | LOW      |
| <b>Clom vs Sert</b> | Downgrade because >70% contribution from moderate RoB comparisons | No downgrade                                                | No downgrade                         | No downgrade                                                                                                                       | Downgrade | LOW      |

|                     |                                                                   |                                                             |              |                                                                                                                                    |           |          |
|---------------------|-------------------------------------------------------------------|-------------------------------------------------------------|--------------|------------------------------------------------------------------------------------------------------------------------------------|-----------|----------|
| <b>Clom vs Traz</b> | Downgrade because >70% contribution from moderate RoB comparisons | No downgrade                                                | No downgrade | No downgrade                                                                                                                       | Downgrade | LOW      |
| <b>Clom vs Venl</b> | Downgrade because >70% contribution from moderate RoB comparisons | No downgrade                                                | No downgrade | No downgrade                                                                                                                       | Downgrade | LOW      |
| <b>Clom vs Vort</b> | No downgrade                                                      | No downgrade                                                | No downgrade | Downgrade because of concerns about transitivity. Vort is a singly connected node and hence evaluation of transitivity is unclear. | Downgrade | LOW      |
| <b>Dulo vs Esei</b> | No downgrade                                                      | No downgrade                                                | No downgrade | No downgrade                                                                                                                       | Downgrade | MODERATE |
| <b>Dulo vs Fluo</b> | No downgrade                                                      | No downgrade                                                | No downgrade | No downgrade                                                                                                                       | Downgrade | MODERATE |
| <b>Dulo vs Fluv</b> | Downgrade because >70% contribution from moderate RoB comparisons | No downgrade                                                | No downgrade | No downgrade                                                                                                                       | Downgrade | LOW      |
| <b>Dulo vs Miln</b> | Downgrade because >70% contribution from moderate RoB comparisons | Downgrade because point estimate >1.0 but lower limit <0.80 | No downgrade | No downgrade                                                                                                                       | Downgrade | VERY LOW |
| <b>Dulo vs Mirt</b> | No downgrade                                                      | No downgrade                                                | No downgrade | No downgrade                                                                                                                       | Downgrade | MODERATE |
| <b>Dulo vs Nefa</b> | Downgrade because >70% contribution from moderate RoB comparisons | Downgrade because point estimate >1.0 but lower limit <0.80 | No downgrade | No downgrade                                                                                                                       | Downgrade | VERY LOW |
| <b>Dulo vs Paro</b> | Downgrade because >70% contribution from moderate RoB comparisons | No downgrade                                                | No downgrade | No downgrade                                                                                                                       | Downgrade | LOW      |
| <b>Dulo vs Rebo</b> | Downgrade because >70% contribution from moderate RoB comparisons | No downgrade                                                | No downgrade | No downgrade                                                                                                                       | Downgrade | LOW      |
| <b>Dulo vs Sert</b> | Downgrade because >70% contribution from moderate RoB comparisons | Downgrade because point estimate >1.0 but lower limit <0.80 | No downgrade | No downgrade                                                                                                                       | Downgrade | VERY LOW |

|              |                                                                   |                                                             |              |                                                                                                                                    |           |          |
|--------------|-------------------------------------------------------------------|-------------------------------------------------------------|--------------|------------------------------------------------------------------------------------------------------------------------------------|-----------|----------|
| Dulo vs Traz | Downgrade because >70% contribution from moderate RoB comparisons | No downgrade                                                | No downgrade | No downgrade                                                                                                                       | Downgrade | LOW      |
| Dulo vs Venl | Downgrade because >70% contribution from moderate RoB comparisons | No downgrade                                                | No downgrade | No downgrade                                                                                                                       | Downgrade | LOW      |
| Dulo vs Vort | No downgrade                                                      | No downgrade                                                | No downgrade | Downgrade because of concerns about transitivity. Vort is a singly connected node and hence evaluation of transitivity is unclear. | Downgrade | LOW      |
| Esci vs Fluo | No downgrade                                                      | No downgrade                                                | No downgrade | No downgrade                                                                                                                       | Downgrade | MODERATE |
| Esci vs Fluv | No downgrade                                                      | No downgrade                                                | No downgrade | No downgrade                                                                                                                       | Downgrade | MODERATE |
| Esci vs Miln | No downgrade                                                      | No downgrade                                                | No downgrade | No downgrade                                                                                                                       | Downgrade | MODERATE |
| Esci vs Mirt | No downgrade                                                      | No downgrade                                                | No downgrade | No downgrade                                                                                                                       | Downgrade | MODERATE |
| Esci vs Nefa | No downgrade                                                      | No downgrade                                                | No downgrade | No downgrade                                                                                                                       | Downgrade | MODERATE |
| Esci vs Paro | No downgrade                                                      | No downgrade                                                | No downgrade | No downgrade                                                                                                                       | Downgrade | MODERATE |
| Esci vs Rebo | No downgrade                                                      | No downgrade                                                | No downgrade | No downgrade                                                                                                                       | Downgrade | MODERATE |
| Esci vs Sert | No downgrade                                                      | No downgrade                                                | No downgrade | No downgrade                                                                                                                       | Downgrade | MODERATE |
| Esci vs Traz | No downgrade                                                      | No downgrade                                                | No downgrade | No downgrade                                                                                                                       | Downgrade | MODERATE |
| Esci vs Venl | No downgrade                                                      | No downgrade                                                | No downgrade | No downgrade                                                                                                                       | Downgrade | MODERATE |
| Esci vs Vort | No downgrade                                                      | Downgrade because point estimate <1.0 but upper limit >1.25 | No downgrade | Downgrade because of concerns about transitivity. Vort is a singly connected node and hence evaluation of transitivity is unclear. | Downgrade | VERY LOW |
| Fluo vs Fluv | No downgrade                                                      | No downgrade                                                | No downgrade | No downgrade                                                                                                                       | Downgrade | MODERATE |
| Fluo vs Miln | No downgrade                                                      | No downgrade                                                | No downgrade | No downgrade                                                                                                                       | Downgrade | MODERATE |
| Fluo vs Mirt | No downgrade                                                      | No downgrade                                                | No downgrade | No downgrade                                                                                                                       | Downgrade | MODERATE |
| Fluo vs Nefa | Downgrade because >70% contribution from moderate RoB comparisons | Downgrade because point estimate <1.0 but upper limit >1.25 | No downgrade | No downgrade                                                                                                                       | Downgrade | VERY LOW |
| Fluo vs Paro | No downgrade                                                      | No downgrade                                                | No downgrade | No downgrade                                                                                                                       | Downgrade | MODERATE |
| Fluo vs Rebo | Downgrade because >70% contribution from moderate RoB comparisons | No downgrade                                                | No downgrade | No downgrade                                                                                                                       | Downgrade | LOW      |

|              |                                                                   |                                                             |                                          |                                                                                                                                    |           |          |
|--------------|-------------------------------------------------------------------|-------------------------------------------------------------|------------------------------------------|------------------------------------------------------------------------------------------------------------------------------------|-----------|----------|
| Fluo vs Sert | Downgrade because >70% contribution from moderate RoB comparisons | No downgrade                                                | Downgrade because side-splitting p=0.022 | No downgrade                                                                                                                       | Downgrade | VERY LOW |
| Fluo vs Traz | Downgrade because >70% contribution from moderate RoB comparisons | No downgrade                                                | No downgrade                             | No downgrade                                                                                                                       | Downgrade | LOW      |
| Fluo vs Venl | Downgrade because >70% contribution from moderate RoB comparisons | No downgrade                                                | No downgrade                             | No downgrade                                                                                                                       | Downgrade | LOW      |
| Fluo vs Vort | No downgrade                                                      | No downgrade                                                | No downgrade                             | Downgrade because of concerns about transitivity. Vort is a singly connected node and hence evaluation of transitivity is unclear. | Downgrade | LOW      |
| Fluv vs Miln | Downgrade because >70% contribution from moderate RoB comparisons | No downgrade                                                | No downgrade                             | No downgrade                                                                                                                       | Downgrade | LOW      |
| Fluv vs Mirt | No downgrade                                                      | No downgrade                                                | No downgrade                             | No downgrade                                                                                                                       | Downgrade | MODERATE |
| Fluv vs Nefa | Downgrade because >70% contribution from moderate RoB comparisons | Downgrade because point estimate <1.0 but upper limit >1.25 | No downgrade                             | No downgrade                                                                                                                       | Downgrade | VERY LOW |
| Fluv vs Paro | No downgrade                                                      | No downgrade                                                | No downgrade                             | No downgrade                                                                                                                       | Downgrade | MODERATE |
| Fluv vs Rebo | Downgrade because >70% contribution from moderate RoB comparisons | No downgrade                                                | No downgrade                             | No downgrade                                                                                                                       | Downgrade | LOW      |
| Fluv vs Sert | No downgrade                                                      | No downgrade                                                | Downgrade because side-splitting p=0.069 | No downgrade                                                                                                                       | Downgrade | LOW      |
| Fluv vs Traz | Downgrade because >70% contribution from moderate RoB comparisons | No downgrade                                                | No downgrade                             | No downgrade                                                                                                                       | Downgrade | LOW      |
| Fluv vs Venl | No downgrade                                                      | No downgrade                                                | No downgrade                             | No downgrade                                                                                                                       | Downgrade | MODERATE |

|              |                                                                   |                                                             |              |                                                                                                                                    |           |          |
|--------------|-------------------------------------------------------------------|-------------------------------------------------------------|--------------|------------------------------------------------------------------------------------------------------------------------------------|-----------|----------|
| Fluv vs Vort | No downgrade                                                      | No downgrade                                                | No downgrade | Downgrade because of concerns about transitivity. Vort is a singly connected node and hence evaluation of transitivity is unclear. | Downgrade | LOW      |
| Miln vs Mirt | No downgrade                                                      | No downgrade                                                | No downgrade | No downgrade                                                                                                                       | Downgrade | MODERATE |
| Miln vs Nefa | Downgrade because >70% contribution from moderate RoB comparisons | Downgrade because point estimate >1.0 but lower limit <0.80 | No downgrade | No downgrade                                                                                                                       | Downgrade | VERY LOW |
| Miln vs Paro | Downgrade because >70% contribution from moderate RoB comparisons | No downgrade                                                | No downgrade | No downgrade                                                                                                                       | Downgrade | LOW      |
| Miln vs Rebo | Downgrade because >70% contribution from moderate RoB comparisons | No downgrade                                                | No downgrade | No downgrade                                                                                                                       | Downgrade | LOW      |
| Miln vs Sert | No downgrade                                                      | Downgrade because point estimate <1.0 but upper limit >1.25 | No downgrade | No downgrade                                                                                                                       | Downgrade | LOW      |
| Miln vs Traz | No downgrade                                                      | No downgrade                                                | No downgrade | No downgrade                                                                                                                       | Downgrade | MODERATE |
| Miln vs Venl | No downgrade                                                      | No downgrade                                                | No downgrade | No downgrade                                                                                                                       | Downgrade | MODERATE |
| Miln vs Vort | No downgrade                                                      | No downgrade                                                | No downgrade | Downgrade because of concerns about transitivity. Vort is a singly connected node and hence evaluation of transitivity is unclear. | Downgrade | LOW      |
| Mirt vs Nefa | No downgrade                                                      | No downgrade                                                | No downgrade | No downgrade                                                                                                                       | Downgrade | MODERATE |
| Mirt vs Paro | No downgrade                                                      | No downgrade                                                | No downgrade | No downgrade                                                                                                                       | Downgrade | MODERATE |
| Mirt vs Rebo | No downgrade                                                      | No downgrade                                                | No downgrade | No downgrade                                                                                                                       | Downgrade | MODERATE |
| Mirt vs Sert | No downgrade                                                      | No downgrade                                                | No downgrade | No downgrade                                                                                                                       | Downgrade | MODERATE |
| Mirt vs Traz | No downgrade                                                      | No downgrade                                                | No downgrade | No downgrade                                                                                                                       | Downgrade | MODERATE |
| Mirt vs Venl | No downgrade                                                      | No downgrade                                                | No downgrade | No downgrade                                                                                                                       | Downgrade | MODERATE |
| Mirt vs Vort | No downgrade                                                      | Downgrade because point estimate <1.0 but upper limit >1.25 | No downgrade | Downgrade because of concerns about transitivity. Vort is a singly connected node and hence evaluation of transitivity is unclear. | Downgrade | VERY LOW |

|              |                                                                   |                                                             |                                      |                                                                                                                                    |           |          |
|--------------|-------------------------------------------------------------------|-------------------------------------------------------------|--------------------------------------|------------------------------------------------------------------------------------------------------------------------------------|-----------|----------|
| Nefa vs Paro | Downgrade because >70% contribution from moderate RoB comparisons | Downgrade because point estimate <1.0 but upper limit >1.25 | No downgrade                         | No downgrade                                                                                                                       | Downgrade | VERY LOW |
| Nefa vs Rebo | Downgrade because >70% contribution from moderate RoB comparisons | Downgrade because point estimate >1.0 but lower limit <0.80 | No downgrade                         | No downgrade                                                                                                                       | Downgrade | VERY LOW |
| Nefa vs Sert | Downgrade because >70% contribution from moderate RoB comparisons | Downgrade because point estimate <1.0 but upper limit >1.25 | No downgrade                         | No downgrade                                                                                                                       | Downgrade | VERY LOW |
| Nefa vs Traz | Downgrade because >70% contribution from moderate RoB comparisons | Downgrade because point estimate >1.0 but lower limit <0.80 | No downgrade                         | No downgrade                                                                                                                       | Downgrade | VERY LOW |
| Nefa vs Venl | Downgrade because >70% contribution from moderate RoB comparisons | Downgrade because point estimate <1.0 but upper limit >1.25 | No downgrade                         | No downgrade                                                                                                                       | Downgrade | VERY LOW |
| Nefa vs Vort | No downgrade                                                      | No downgrade                                                | No downgrade                         | Downgrade because of concerns about transitivity. Vort is a singly connected node and hence evaluation of transitivity is unclear. | Downgrade | LOW      |
| Paro vs Rebo | Downgrade because >70% contribution from moderate RoB comparisons | No downgrade                                                | No downgrade                         | No downgrade                                                                                                                       | Downgrade | LOW      |
| Paro vs Sert | No downgrade                                                      | No downgrade                                                | No downgrade                         | No downgrade                                                                                                                       | Downgrade | MODERATE |
| Paro vs Traz | No downgrade                                                      | No downgrade                                                | No downgrade                         | No downgrade                                                                                                                       | Downgrade | MODERATE |
| Paro vs Venl | No downgrade                                                      | No downgrade                                                | Downgrade for side-splitting p=0.033 | No downgrade                                                                                                                       | Downgrade | LOW      |
| Paro vs Vort | No downgrade                                                      | No downgrade                                                | No downgrade                         | Downgrade because of concerns about transitivity. Vort is a singly connected node and hence evaluation of transitivity is unclear. | Downgrade | LOW      |



|              |                                                                   |                                                             |                                      |                                                                                                                                    |           |          |
|--------------|-------------------------------------------------------------------|-------------------------------------------------------------|--------------------------------------|------------------------------------------------------------------------------------------------------------------------------------|-----------|----------|
| Rebo vs Sert | Downgrade because >70% contribution from moderate RoB comparisons | No downgrade                                                | No downgrade                         | No downgrade                                                                                                                       | Downgrade | LOW      |
| Rebo vs Traz | Downgrade because >70% contribution from moderate RoB comparisons | Downgrade because point estimate <1.0 but upper limit >1.25 | No downgrade                         | No downgrade                                                                                                                       | Downgrade | VERY LOW |
| Rebo vs Venl | Downgrade because >70% contribution from moderate RoB comparisons | No downgrade                                                | No downgrade                         | No downgrade                                                                                                                       | Downgrade | LOW      |
| Rebo vs Vort | No downgrade                                                      | No downgrade                                                | No downgrade                         | Downgrade because of concerns about transitivity. Vort is a singly connected node and hence evaluation of transitivity is unclear. | Downgrade | LOW      |
| Sert vs Traz | No downgrade                                                      | No downgrade                                                | Downgrade for side-splitting p=0.038 | No downgrade                                                                                                                       | Downgrade | LOW      |
| Sert vs Venl | No downgrade                                                      | No downgrade                                                | No downgrade                         | No downgrade                                                                                                                       | Downgrade | MODERATE |
| Sert vs Vort | No downgrade                                                      | No downgrade                                                | No downgrade                         | Downgrade because of concerns about transitivity. Vort is a singly connected node and hence evaluation of transitivity is unclear. | Downgrade | LOW      |
| Traz vs Venl | Downgrade because >70% contribution from moderate RoB comparisons | No downgrade                                                | No downgrade                         |                                                                                                                                    | Downgrade | LOW      |
| Traz vs Vort | No downgrade                                                      | No downgrade                                                | No downgrade                         | Downgrade because of concerns about transitivity. Vort is a singly connected node and hence evaluation of transitivity is unclear. | Downgrade | LOW      |

|              |              |              |              |                                                                                                                                    |           |     |
|--------------|--------------|--------------|--------------|------------------------------------------------------------------------------------------------------------------------------------|-----------|-----|
| Venl vs Vort | No downgrade | No downgrade | No downgrade | Downgrade because of concerns about transitivity. Vort is a singly connected node and hence evaluation of transitivity is unclear. | Downgrade | LOW |
|--------------|--------------|--------------|--------------|------------------------------------------------------------------------------------------------------------------------------------|-----------|-----|

## 9.2 Dropouts for any reason

### 9.2.1 Summary of study limitations of the included studies

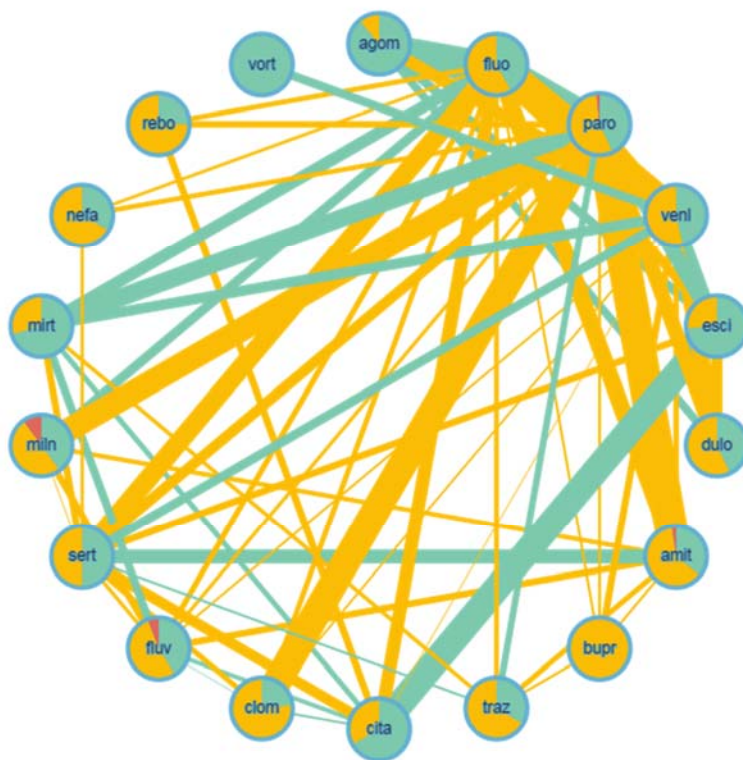

### 9.2.2 Contribution of low or moderate RoB comparisons to each network estimate

Based on the above assessment of RoB for each comparison and the contribution matrix detailing contribution of each direct comparison to all network estimates, the following bar graphs show the percentage of low or moderate RoB contributions for each network estimate.

The judgements about study limitations in each direct comparison is shown at the beginning of the graph. Each bar corresponds to a NMA relative treatment effect and shows how much information comes from comparisons at low risk of bias [green] or moderate risk of bias [yellow].

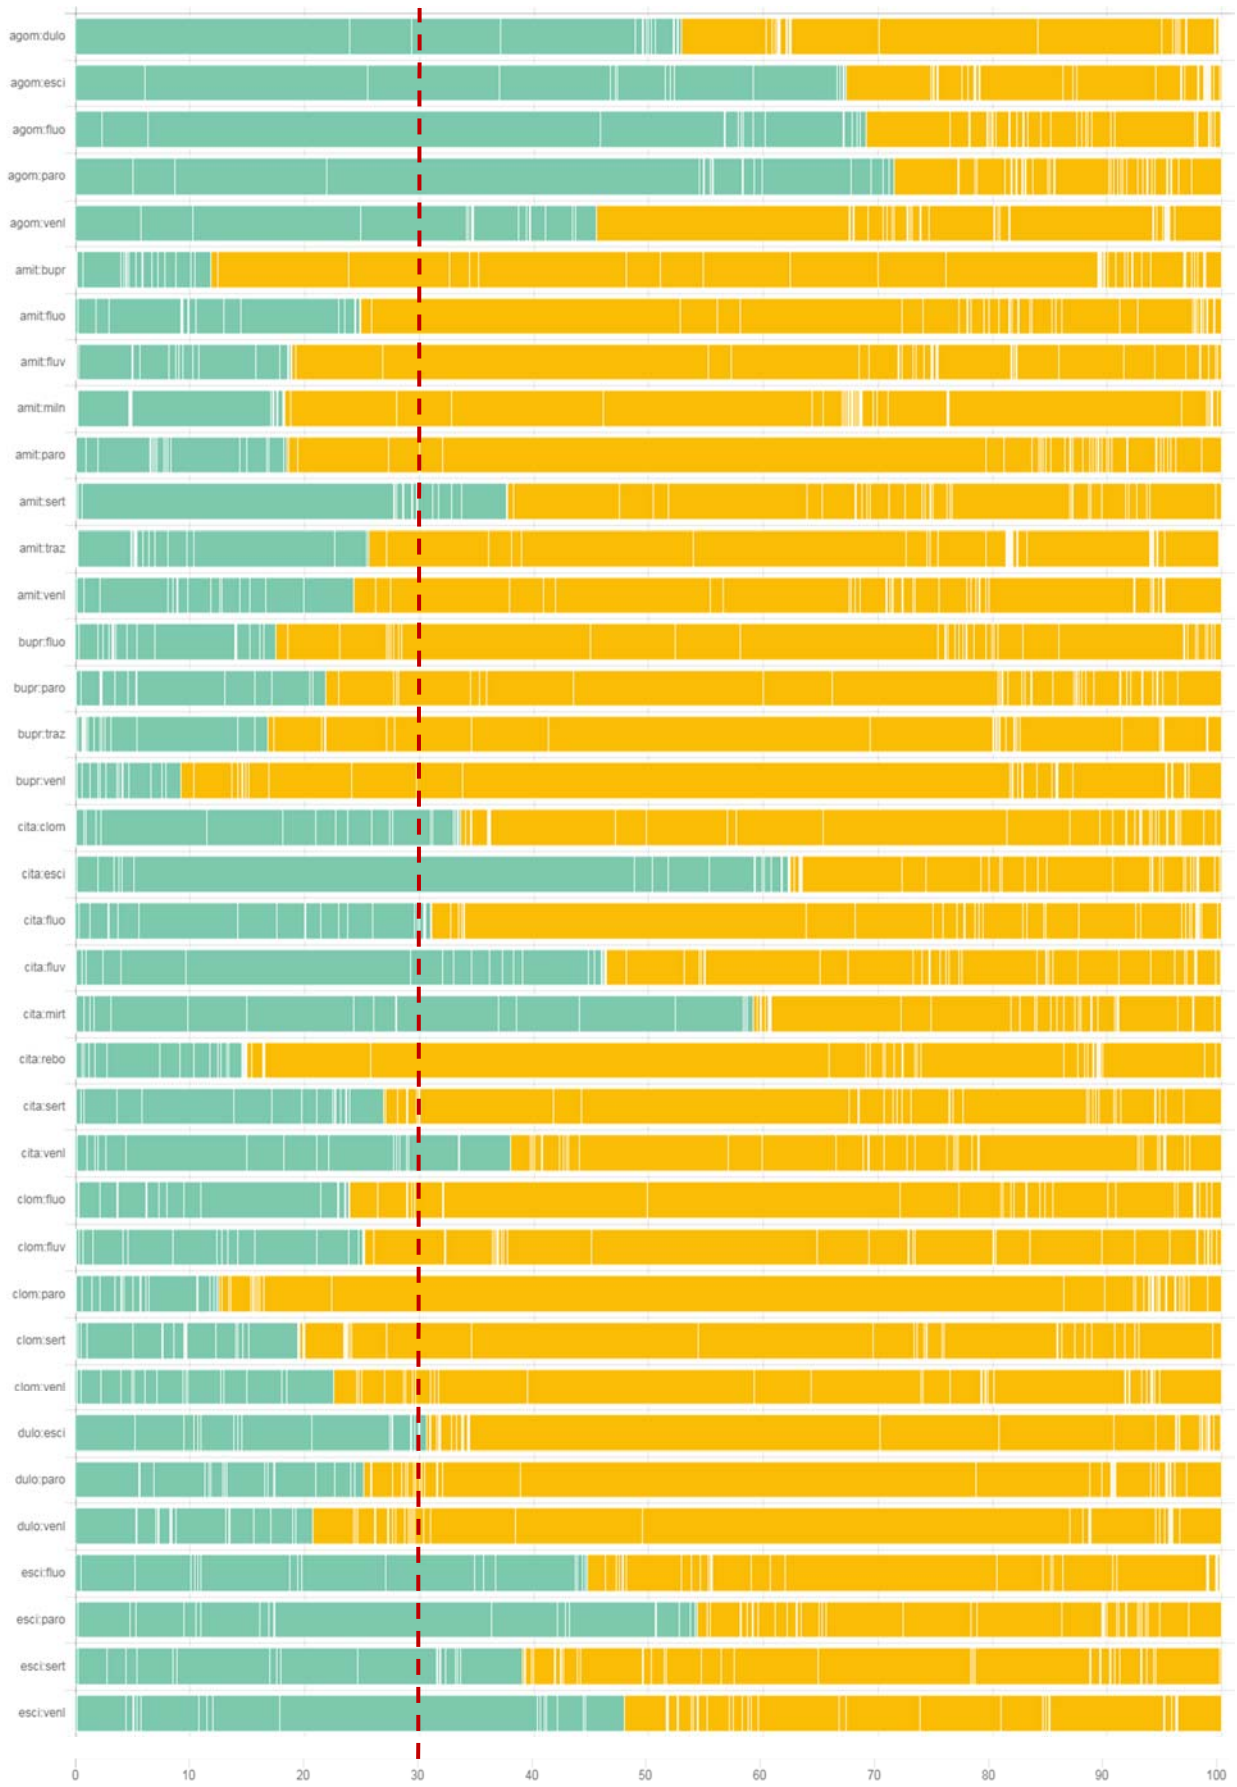

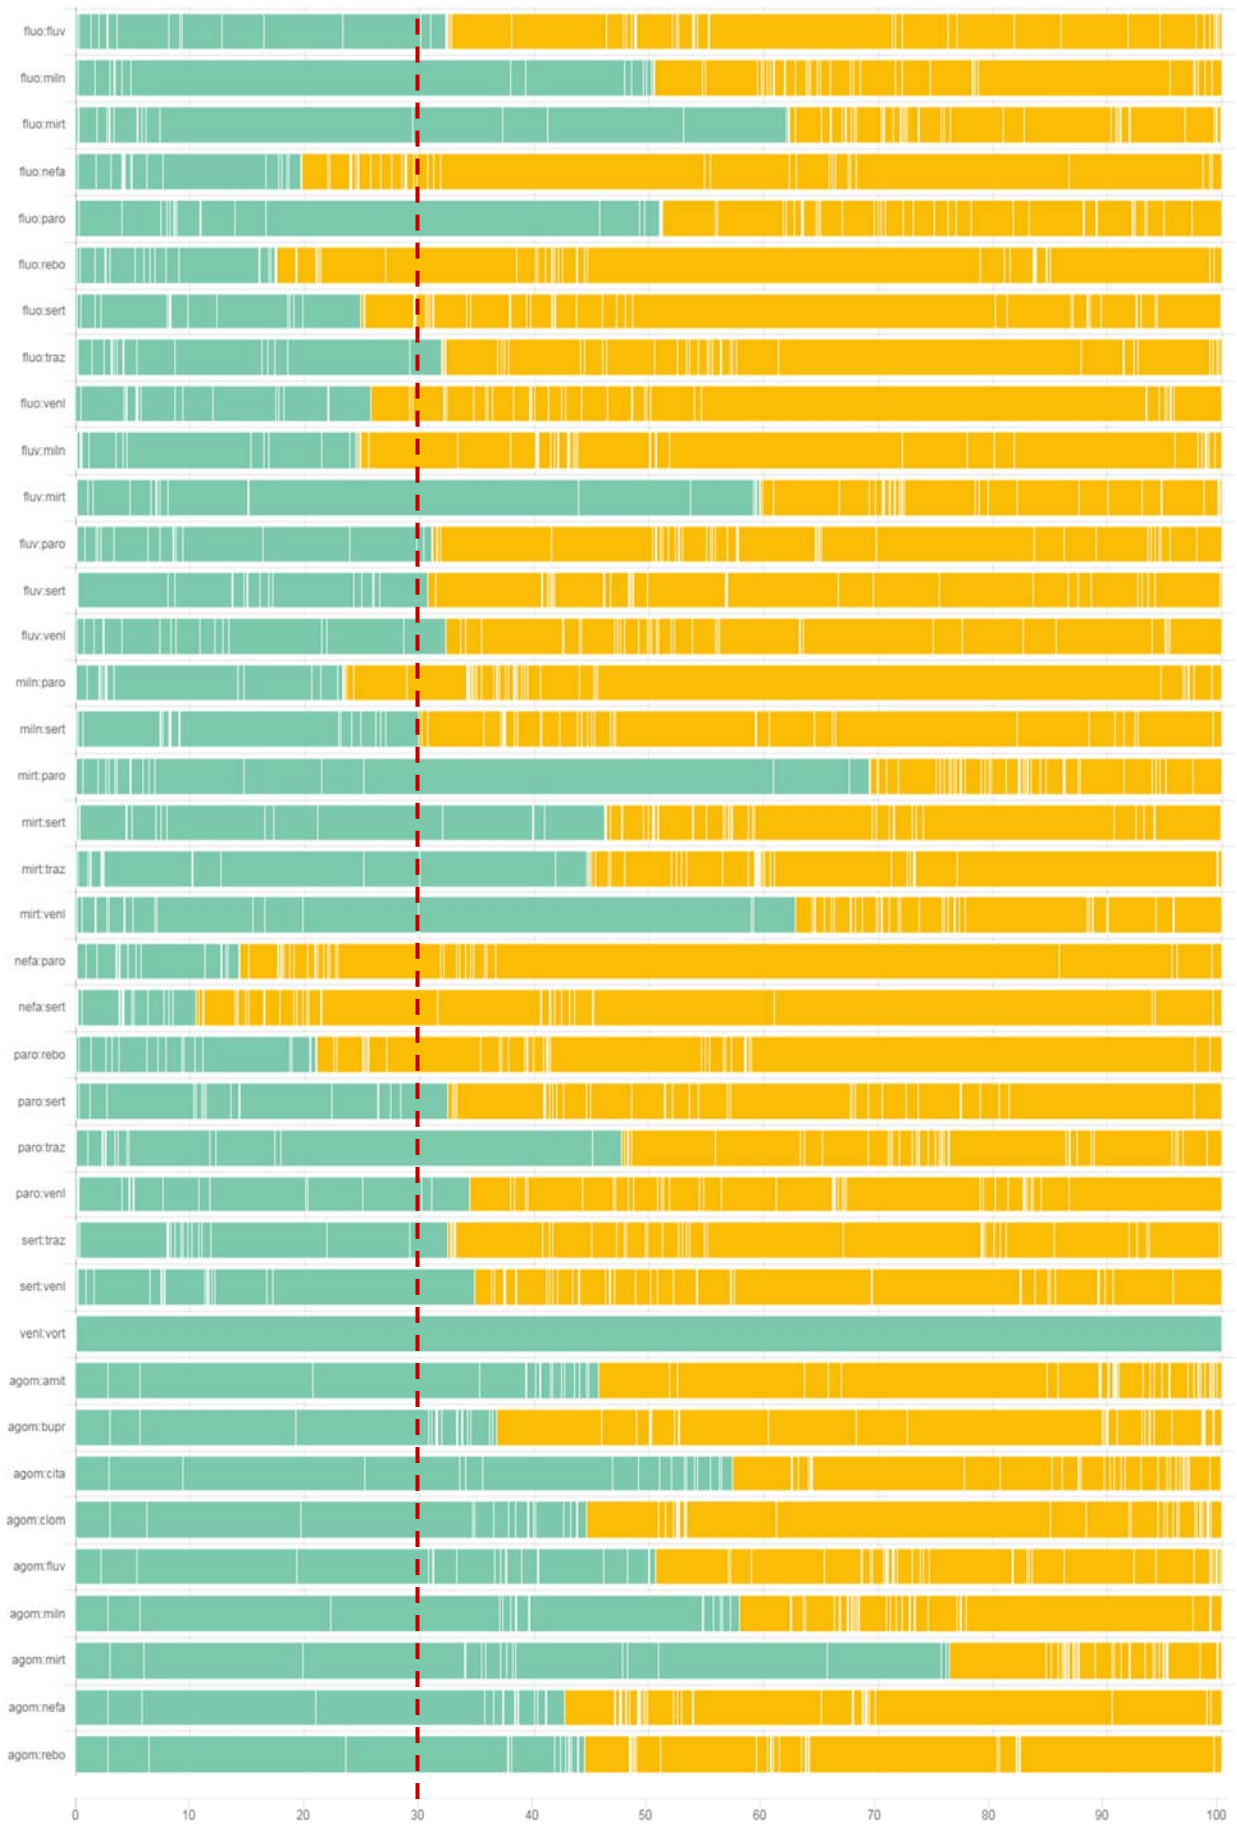

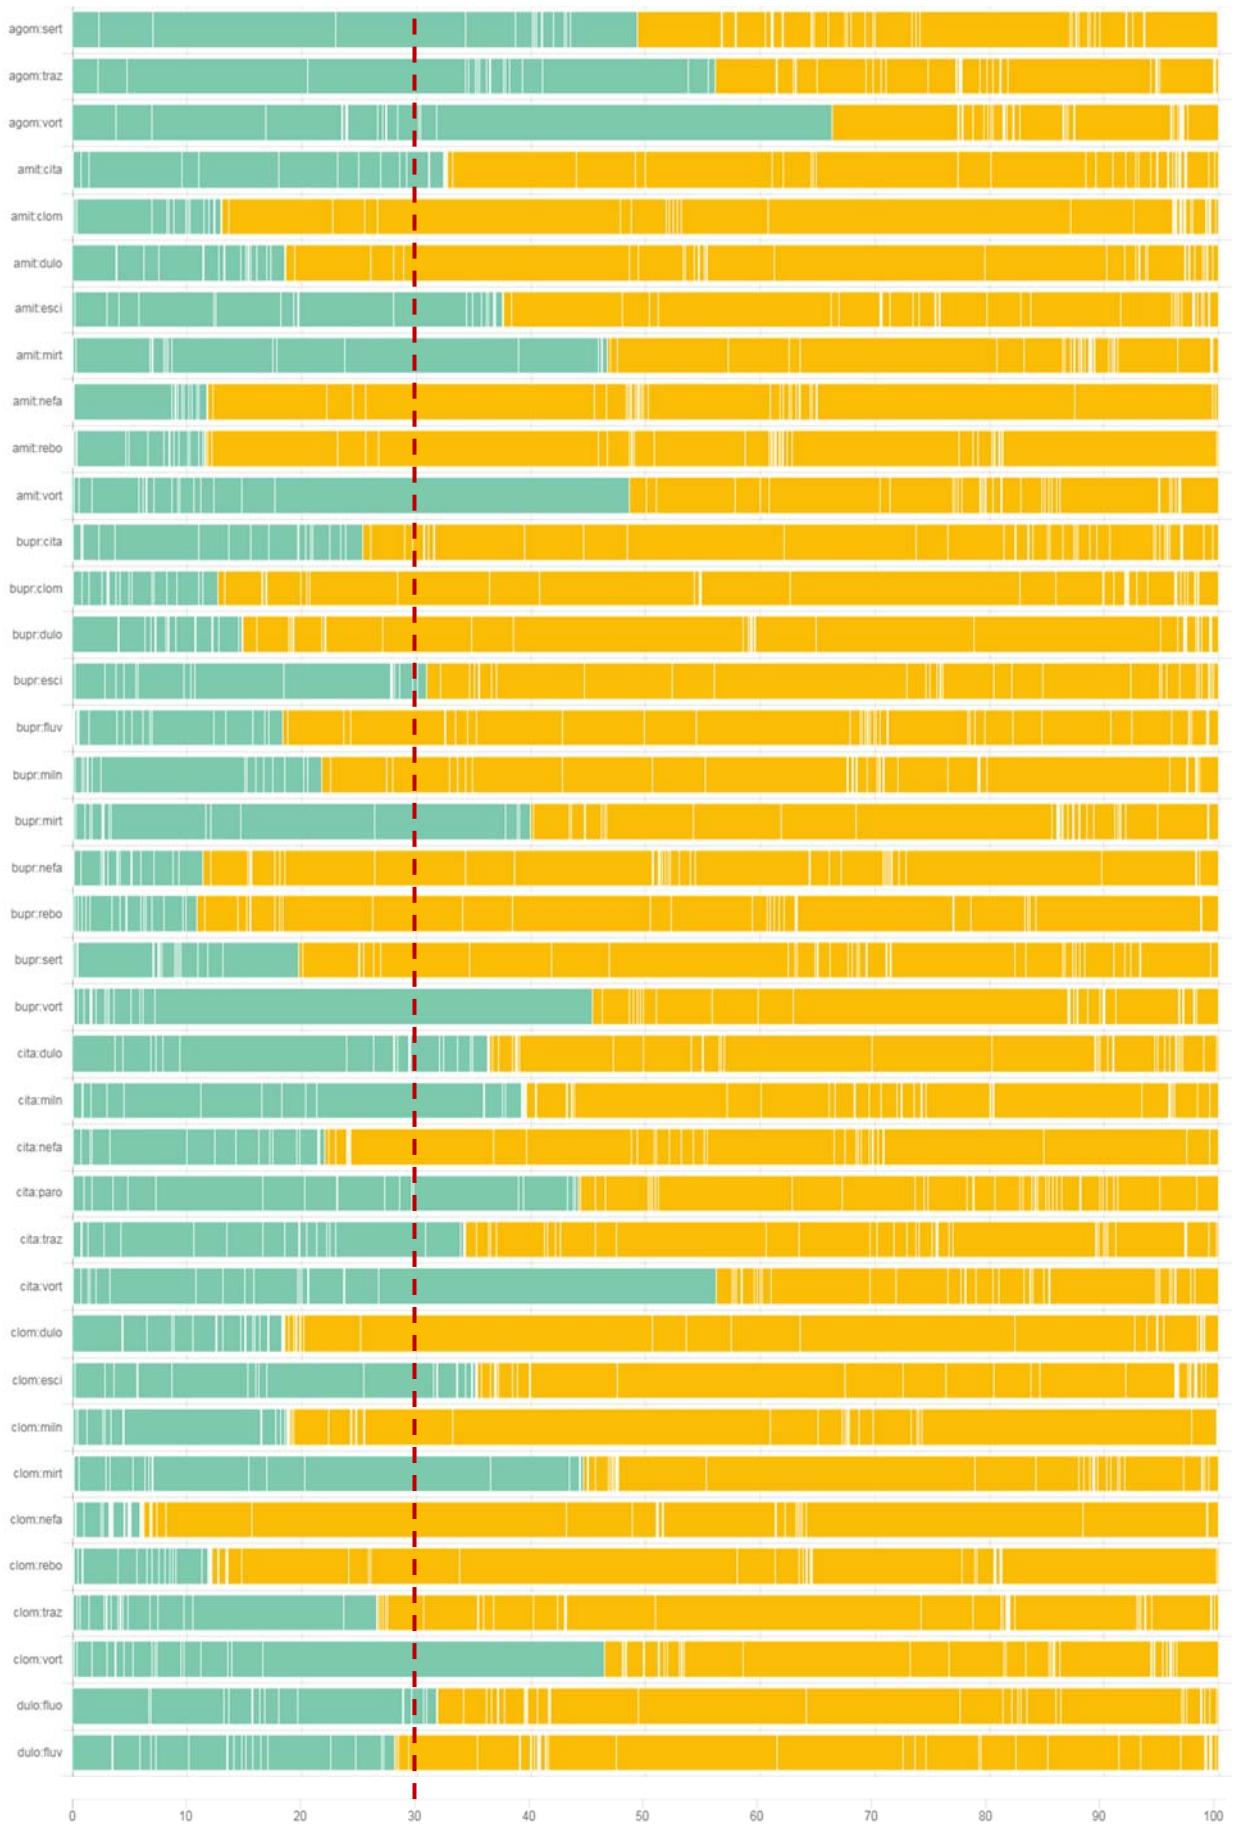

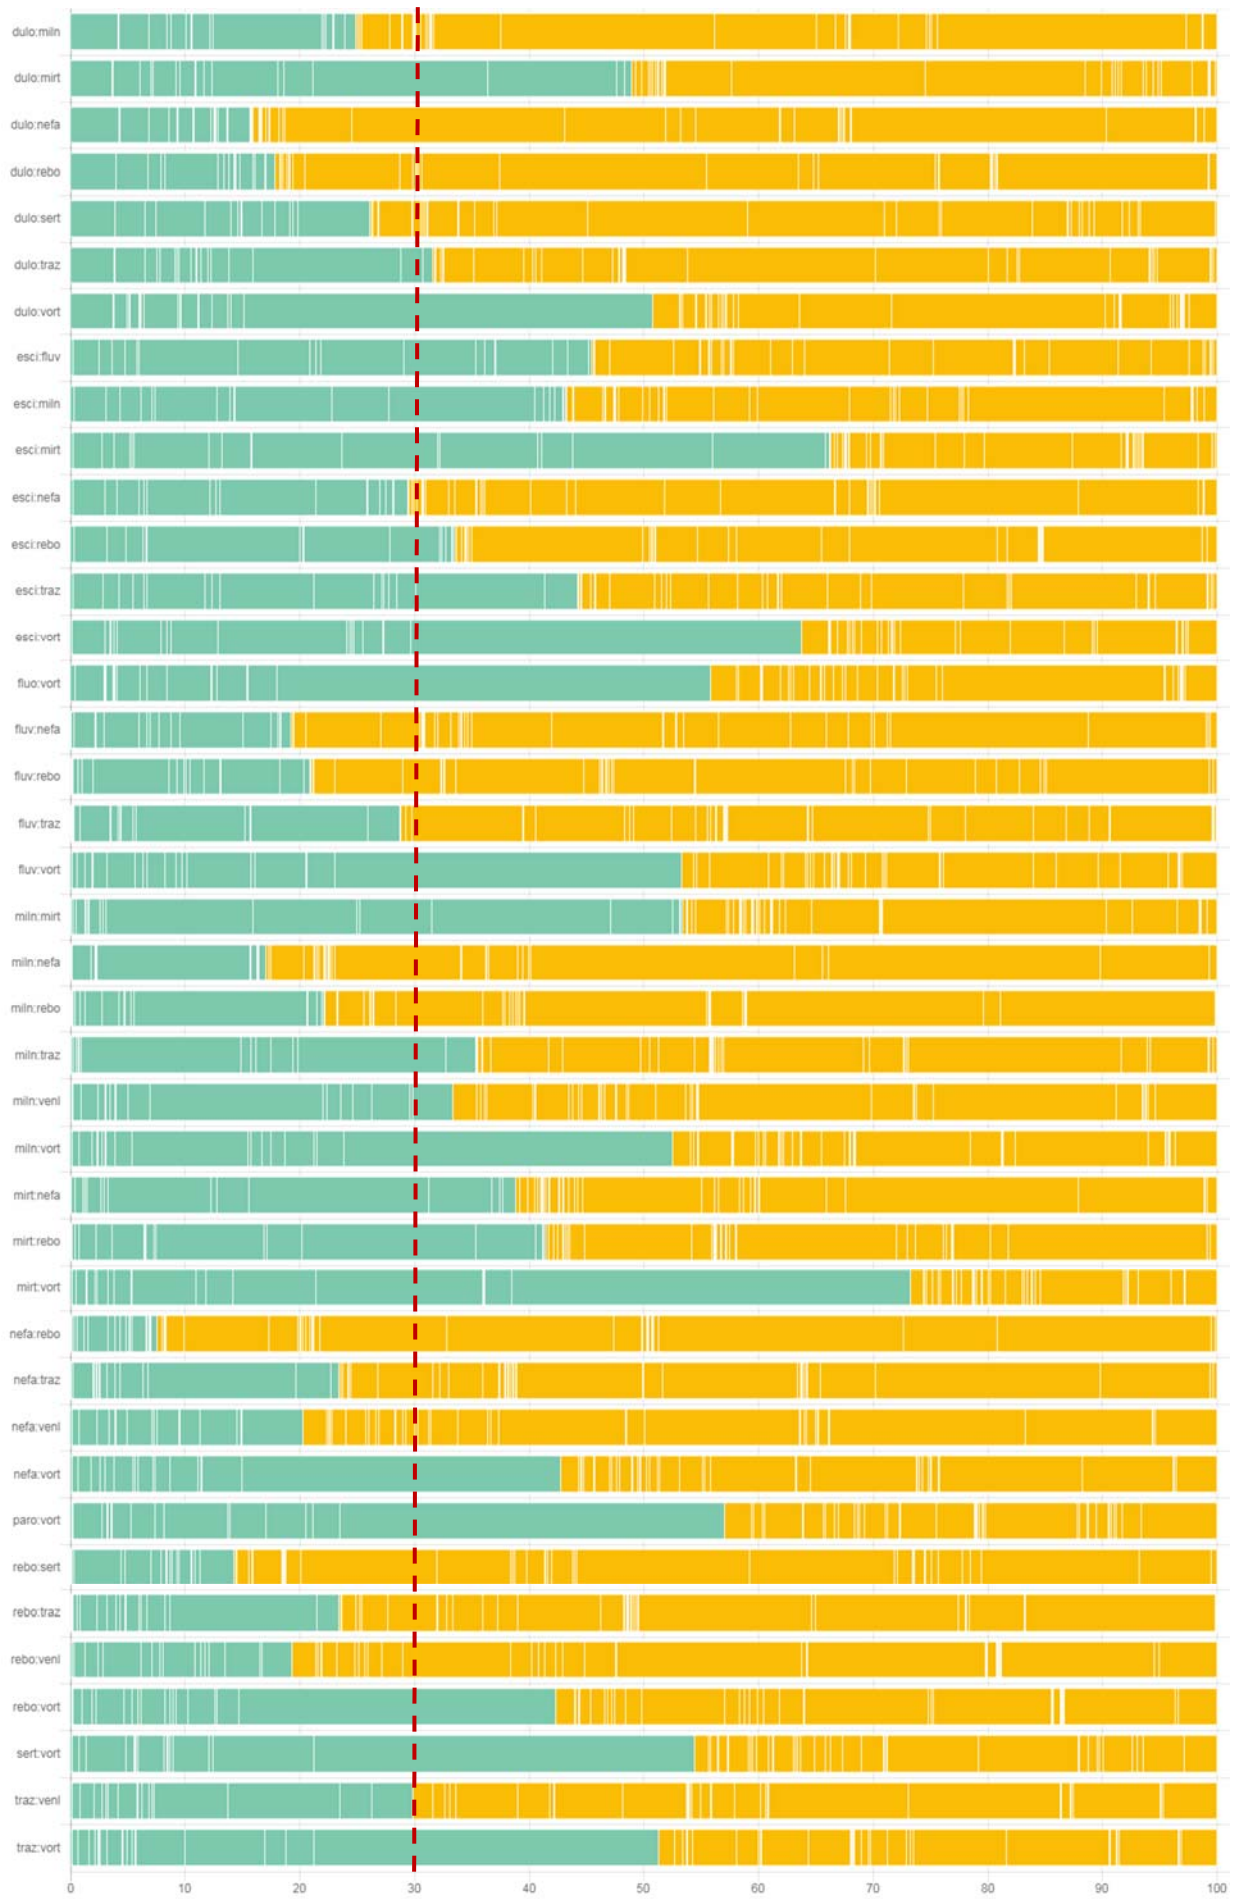

### 9.2.3 Table of reasons for downgrading

- (1) **Study limitations:** We downgraded by one level when the contributions from low RoB comparisons were less than 30% and contributions from moderate RoB comparisons were greater than 70%.
- (2) **Imprecision:** We considered a clinically meaningful threshold for OR to be 0.80 or 1.25 and downgraded the estimate if the OR point estimate is 1 or more and the lower limit of its CrI is below 0.80; or if the OR point estimate is less than 1 and the upper limit of its CrI is above 1.25.
- (3) **Inconsistency:** We rated two concepts, heterogeneity and incoherence (inconsistency), in this domain. For heterogeneity, we looked at the common tau and found that it is low compared to the expected value as reported in the literature (Turner RM et al (2012) *Int J Epidemiol*, 41, 818-827), so we did not downgrade any network estimate for heterogeneity. For inconsistency, we looked at the results of side splitting (8.3.2.2) and we downgraded the comparisons with important inconsistency ( $p < 0.10$ ), where we have not downgraded for imprecision (we did not downgrade the same network estimate for both imprecision and inconsistency). The design-by-treatment test was also suggestive of inconsistency in the network (8.3.2.3).
- (4) **Indirectness:** We have assured transitivity in our network by limiting the included studies to non-psychotic non-refractory unipolar major depression, because bipolarity, psychotic features, subthreshold depression and treatment refractoriness are established treatment modifiers for antidepressants. We further ran various meta-regressions, and assured that they did not violate transitivity of the network. However, we downgraded singly-connected nodes for indirectness because evaluation of transitivity for such nodes is unclear.
- (5) **Publication bias:** The comparison-adjusted funnel plot (8.4.2) was not suggestive of funnel plot asymmetry in comparison with the old, standard drug fluoxetine. There was no network estimate for which the meta-regression for small-study effects suggested the statistically significant influence of small-study effects (8.5.2.2). We managed to retrieve supplementary and unpublished information included in the available systematic reviews and network meta-analyses, and we are confident that we have all available information that is possible to capture from clinical trial registries, regulatory agencies' repositories and drug companies' websites (particularly for the newest and most recently marketed antidepressants). However, we cannot completely rule out the possibility that some studies are still missing. Considering that the field of antidepressant trials in the past has been prone to publication bias, the review team decided by default to downgrade all the included studies for potential publication bias by one level.



|              | Study limitations                                                 | Imprecision                                                 | Inconsistency                        | Indirectness                                      | Publication bias | GRADE    |
|--------------|-------------------------------------------------------------------|-------------------------------------------------------------|--------------------------------------|---------------------------------------------------|------------------|----------|
| Agom vs Amit | No downgrade                                                      | No downgrade                                                | No downgrade                         | No downgrade                                      | Downgrade        | MODERATE |
| Agom vs Bupr | No downgrade                                                      | No downgrade                                                | No downgrade                         | No downgrade                                      | Downgrade        | MODERATE |
| Agom vs Cita | No downgrade                                                      | No downgrade                                                | No downgrade                         | No downgrade                                      | Downgrade        | MODERATE |
| Agom vs Clom | No downgrade                                                      | No downgrade                                                | No downgrade                         | No downgrade                                      | Downgrade        | MODERATE |
| Agom vs Dulo | No downgrade                                                      | No downgrade                                                | Downgrade for side-splitting p=0.008 | No downgrade                                      | Downgrade        | LOW      |
| Agom vs Esci | No downgrade                                                      | No downgrade                                                | No downgrade                         | No downgrade                                      | Downgrade        | MODERATE |
| Agom vs Fluo | No downgrade                                                      | No downgrade                                                | Downgrade for side-splitting p=0.061 | No downgrade                                      | Downgrade        | LOW      |
| Agom vs Fluv | No downgrade                                                      | No downgrade                                                | Downgrade for side-splitting p=0.091 | No downgrade                                      | Downgrade        | LOW      |
| Agom vs Miln | No downgrade                                                      | No downgrade                                                | No downgrade                         | No downgrade                                      | Downgrade        | MODERATE |
| Agom vs Mirt | No downgrade                                                      | No downgrade                                                | No downgrade                         | No downgrade                                      | Downgrade        | MODERATE |
| Agom vs Nefa | No downgrade                                                      | No downgrade                                                | No downgrade                         | No downgrade                                      | Downgrade        | MODERATE |
| Agom vs Paro | No downgrade                                                      | No downgrade                                                | No downgrade                         | No downgrade                                      | Downgrade        | MODERATE |
| Agom vs Rebo | No downgrade                                                      | No downgrade                                                | No downgrade                         | No downgrade                                      | Downgrade        | MODERATE |
| Agom vs Sert | No downgrade                                                      | No downgrade                                                | No downgrade                         | No downgrade                                      | Downgrade        | MODERATE |
| Agom vs Traz | No downgrade                                                      | No downgrade                                                | No downgrade                         | No downgrade                                      | Downgrade        | MODERATE |
| Agom vs Venl | No downgrade                                                      | No downgrade                                                | Downgrade for side-splitting p=0.040 | No downgrade                                      | Downgrade        | LOW      |
| Agom vs Vort | No downgrade                                                      | No downgrade                                                | No downgrade                         | Downgrade because of concerns about transitivity. | Downgrade        | LOW      |
| Amit vs Bupr | Downgrade because >70% contribution from moderate RoB comparisons | Downgrade because point estimate >1.0 but lower limit <0.80 | No downgrade                         | No downgrade                                      | Downgrade        | VERY LOW |
| Amit vs Cita | No downgrade                                                      | No downgrade                                                | No downgrade                         | No downgrade                                      | Downgrade        | MODERATE |
| Amit vs Clom | Downgrade because >70% contribution from moderate RoB comparisons | No downgrade                                                | No downgrade                         | No downgrade                                      | Downgrade        | LOW      |
| Amit vs Dulo | Downgrade because >70% contribution from moderate RoB comparisons | No downgrade                                                | No downgrade                         | No downgrade                                      | Downgrade        | LOW      |
| Amit vs Esci | No downgrade                                                      | No downgrade                                                | No downgrade                         | No downgrade                                      | Downgrade        | MODERATE |
| Amit vs Fluo | Downgrade because >70% contribution from moderate RoB comparisons | No downgrade                                                | No downgrade                         | No downgrade                                      | Downgrade        | LOW      |

|                     |                                                                   |                                                             |              |                                                   |           |          |
|---------------------|-------------------------------------------------------------------|-------------------------------------------------------------|--------------|---------------------------------------------------|-----------|----------|
| <b>Amit vs Fluv</b> | Downgrade because >70% contribution from moderate RoB comparisons | No downgrade                                                | No downgrade | No downgrade                                      | Downgrade | LOW      |
| <b>Amit vs Miln</b> | Downgrade because >70% contribution from moderate RoB comparisons | No downgrade                                                | No downgrade | No downgrade                                      | Downgrade | LOW      |
| <b>Amit vs Mirt</b> | No downgrade                                                      | No downgrade                                                | No downgrade | No downgrade                                      | Downgrade | MODERATE |
| <b>Amit vs Nefa</b> | Downgrade because >70% contribution from moderate RoB comparisons | Downgrade because point estimate <1.0 but upper limit >1.25 | No downgrade | No downgrade                                      | Downgrade | VERY LOW |
| <b>Amit vs Paro</b> | Downgrade because >70% contribution from moderate RoB comparisons | No downgrade                                                | No downgrade | No downgrade                                      | Downgrade | LOW      |
| <b>Amit vs Rebo</b> | Downgrade because >70% contribution from moderate RoB comparisons | No downgrade                                                | No downgrade | No downgrade                                      | Downgrade | LOW      |
| <b>Amit vs Sert</b> | No downgrade                                                      | No downgrade                                                | No downgrade | No downgrade                                      | Downgrade | MODERATE |
| <b>Amit vs Traz</b> | Downgrade because >70% contribution from moderate RoB comparisons | Downgrade because point estimate <1.0 but upper limit >1.25 | No downgrade | No downgrade                                      | Downgrade | VERY LOW |
| <b>Amit vs Venl</b> | Downgrade because >70% contribution from moderate RoB comparisons | No downgrade                                                | No downgrade | No downgrade                                      | Downgrade | LOW      |
| <b>Amit vs Vort</b> | No downgrade                                                      | No downgrade                                                | No downgrade | Downgrade because of concerns about transitivity. | Downgrade | LOW      |
| <b>Bupr vs Cita</b> | Downgrade because >70% contribution from moderate RoB comparisons | Downgrade because point estimate >1.0 but lower limit <0.80 | No downgrade | No downgrade                                      | Downgrade | VERY LOW |
| <b>Bupr vs Clom</b> | Downgrade because >70% contribution from moderate RoB comparisons | No downgrade                                                | No downgrade | No downgrade                                      | Downgrade | LOW      |

|                     |                                                                   |                                                             |              |              |           |          |
|---------------------|-------------------------------------------------------------------|-------------------------------------------------------------|--------------|--------------|-----------|----------|
| <b>Bupr vs Dulo</b> | Downgrade because >70% contribution from moderate RoB comparisons | No downgrade                                                | No downgrade | No downgrade | Downgrade | LOW      |
| <b>Bupr vs Esci</b> | No downgrade                                                      | No downgrade                                                | No downgrade | No downgrade | Downgrade | MODERATE |
| <b>Bupr vs Fluo</b> | Downgrade because >70% contribution from moderate RoB comparisons | Downgrade because point estimate >1.0 but lower limit <0.80 | No downgrade | No downgrade | Downgrade | VERY LOW |
| <b>Bupr vs Fluv</b> | Downgrade because >70% contribution from moderate RoB comparisons | Downgrade because point estimate <1.0 but upper limit >1.25 | No downgrade | No downgrade | Downgrade | VERY LOW |
| <b>Bupr vs Miln</b> | Downgrade because >70% contribution from moderate RoB comparisons | Downgrade because point estimate >1.0 but lower limit <0.80 | No downgrade | No downgrade | Downgrade | VERY LOW |
| <b>Bupr vs Mirt</b> | No downgrade                                                      | Downgrade because point estimate >1.0 but lower limit <0.80 | No downgrade | No downgrade | Downgrade | LOW      |
| <b>Bupr vs Nefa</b> | Downgrade because >70% contribution from moderate RoB comparisons | Downgrade because point estimate <1.0 but upper limit >1.25 | No downgrade | No downgrade | Downgrade | VERY LOW |
| <b>Bupr vs Paro</b> | Downgrade because >70% contribution from moderate RoB comparisons | Downgrade because point estimate >1.0 but lower limit <0.80 | No downgrade | No downgrade | Downgrade | VERY LOW |
| <b>Bupr vs Rebo</b> | Downgrade because >70% contribution from moderate RoB comparisons | No downgrade                                                | No downgrade | No downgrade | Downgrade | LOW      |
| <b>Bupr vs Sert</b> | Downgrade because >70% contribution from moderate RoB comparisons | Downgrade because point estimate >1.0 but lower limit <0.80 | No downgrade | No downgrade | Downgrade | VERY LOW |
| <b>Bupr vs Traz</b> | Downgrade because >70% contribution from moderate RoB comparisons | Downgrade because point estimate <1.0 but upper limit >1.25 | No downgrade | No downgrade | Downgrade | VERY LOW |

|                     |                                                                   |                                                             |                                      |                                                   |           |          |
|---------------------|-------------------------------------------------------------------|-------------------------------------------------------------|--------------------------------------|---------------------------------------------------|-----------|----------|
| <b>Bupr vs Venl</b> | Downgrade because >70% contribution from moderate RoB comparisons | Downgrade because point estimate <1.0 but upper limit >1.25 | No downgrade                         | No downgrade                                      | Downgrade | VERY LOW |
| <b>Bupr vs Vort</b> | No downgrade                                                      | No downgrade                                                | No downgrade                         | Downgrade because of concerns about transitivity. | Downgrade | LOW      |
| <b>Cita vs Clom</b> | No downgrade                                                      | No downgrade                                                | Downgrade for side-splitting p=0.056 | No downgrade                                      | Downgrade | LOW      |
| <b>Cita vs Dulo</b> | No downgrade                                                      | No downgrade                                                | No downgrade                         | No downgrade                                      | Downgrade | MODERATE |
| <b>Cita vs Esci</b> | No downgrade                                                      | No downgrade                                                | No downgrade                         | No downgrade                                      | Downgrade | MODERATE |
| <b>Cita vs Fluo</b> | No downgrade                                                      | No downgrade                                                | No downgrade                         | No downgrade                                      | Downgrade | MODERATE |
| <b>Cita vs Fluv</b> | No downgrade                                                      | No downgrade                                                | No downgrade                         | No downgrade                                      | Downgrade | MODERATE |
| <b>Cita vs Miln</b> | No downgrade                                                      | No downgrade                                                | No downgrade                         | No downgrade                                      | Downgrade | MODERATE |
| <b>Cita vs Mirt</b> | No downgrade                                                      | No downgrade                                                | Downgrade for side-splitting p=0.069 | No downgrade                                      | Downgrade | LOW      |
| <b>Cita vs Nefa</b> | Downgrade because >70% contribution from moderate RoB comparisons | Downgrade because point estimate <1.0 but upper limit >1.25 | No downgrade                         | No downgrade                                      | Downgrade | VERY LOW |
| <b>Cita vs Paro</b> | No downgrade                                                      | No downgrade                                                | No downgrade                         | No downgrade                                      | Downgrade | MODERATE |
| <b>Cita vs Rebo</b> | Downgrade because >70% contribution from moderate RoB comparisons | No downgrade                                                | No downgrade                         | No downgrade                                      | Downgrade | LOW      |
| <b>Cita vs Sert</b> | Downgrade because >70% contribution from moderate RoB comparisons | No downgrade                                                | Downgrade for side-splitting p=0.039 | No downgrade                                      | Downgrade | VERY LOW |
| <b>Cita vs Traz</b> | No downgrade                                                      | No downgrade                                                | No downgrade                         | No downgrade                                      | Downgrade | MODERATE |
| <b>Cita vs Venl</b> | No downgrade                                                      | No downgrade                                                | Downgrade for side-splitting p=0.016 | No downgrade                                      | Downgrade | LOW      |
| <b>Cita vs Vort</b> | No downgrade                                                      | No downgrade                                                | No downgrade                         | Downgrade because of concerns about transitivity. | Downgrade | LOW      |
| <b>Clom vs Dulo</b> | Downgrade because >70% contribution from moderate RoB comparisons | No downgrade                                                | No downgrade                         | No downgrade                                      | Downgrade | LOW      |
| <b>Clom vs Esci</b> | No downgrade                                                      | No downgrade                                                | No downgrade                         | No downgrade                                      | Downgrade | MODERATE |
| <b>Clom vs Fluo</b> | Downgrade because >70% contribution from moderate RoB comparisons | No downgrade                                                | No downgrade                         | No downgrade                                      | Downgrade | LOW      |

|                     |                                                                   |                                                             |              |                                                   |           |          |
|---------------------|-------------------------------------------------------------------|-------------------------------------------------------------|--------------|---------------------------------------------------|-----------|----------|
| <b>Clom vs Fluv</b> | Downgrade because >70% contribution from moderate RoB comparisons | No downgrade                                                | No downgrade | No downgrade                                      | Downgrade | LOW      |
| <b>Clom vs Miln</b> | Downgrade because >70% contribution from moderate RoB comparisons | No downgrade                                                | No downgrade | No downgrade                                      | Downgrade | LOW      |
| <b>Clom vs Mirt</b> | No downgrade                                                      | No downgrade                                                | No downgrade | No downgrade                                      | Downgrade | MODERATE |
| <b>Clom vs Nefa</b> | Downgrade because >70% contribution from moderate RoB comparisons | Downgrade because point estimate >1.0 but lower limit <0.80 | No downgrade | No downgrade                                      | Downgrade | VERY LOW |
| <b>Clom vs Paro</b> | Downgrade because >70% contribution from moderate RoB comparisons | No downgrade                                                | No downgrade | No downgrade                                      | Downgrade | LOW      |
| <b>Clom vs Rebo</b> | Downgrade because >70% contribution from moderate RoB comparisons | Downgrade because point estimate <1.0 but upper limit >1.25 | No downgrade | No downgrade                                      | Downgrade | VERY LOW |
| <b>Clom vs Sert</b> | Downgrade because >70% contribution from moderate RoB comparisons | No downgrade                                                | No downgrade | No downgrade                                      | Downgrade | LOW      |
| <b>Clom vs Traz</b> | Downgrade because >70% contribution from moderate RoB comparisons | No downgrade                                                | No downgrade | No downgrade                                      | Downgrade | LOW      |
| <b>Clom vs Venl</b> | Downgrade because >70% contribution from moderate RoB comparisons | No downgrade                                                | No downgrade | No downgrade                                      | Downgrade | LOW      |
| <b>Clom vs Vort</b> | No downgrade                                                      | No downgrade                                                | No downgrade | Downgrade because of concerns about transitivity. | Downgrade | LOW      |
| <b>Dulo vs Esci</b> | No downgrade                                                      | No downgrade                                                | No downgrade | No downgrade                                      | Downgrade | MODERATE |
| <b>Dulo vs Fluo</b> | No downgrade                                                      | No downgrade                                                | No downgrade | No downgrade                                      | Downgrade | MODERATE |
| <b>Dulo vs Fluv</b> | Downgrade because >70% contribution from moderate RoB comparisons | No downgrade                                                | No downgrade | No downgrade                                      | Downgrade | LOW      |

|              |                                                                   |                                                             |                                      |                                                   |           |          |
|--------------|-------------------------------------------------------------------|-------------------------------------------------------------|--------------------------------------|---------------------------------------------------|-----------|----------|
| Dulo vs Miln | Downgrade because >70% contribution from moderate RoB comparisons | No downgrade                                                | No downgrade                         | No downgrade                                      | Downgrade | LOW      |
| Dulo vs Mirt | No downgrade                                                      | No downgrade                                                | No downgrade                         | No downgrade                                      | Downgrade | MODERATE |
| Dulo vs Nefa | Downgrade because >70% contribution from moderate RoB comparisons | Downgrade because point estimate >1.0 but lower limit <0.80 | No downgrade                         | No downgrade                                      | Downgrade | VERY LOW |
| Dulo vs Paro | Downgrade because >70% contribution from moderate RoB comparisons | No downgrade                                                | No downgrade                         | No downgrade                                      | Downgrade | LOW      |
| Dulo vs Rebo | Downgrade because >70% contribution from moderate RoB comparisons | Downgrade because point estimate <1.0 but upper limit >1.25 | No downgrade                         | No downgrade                                      | Downgrade | VERY LOW |
| Dulo vs Sert | Downgrade because >70% contribution from moderate RoB comparisons | No downgrade                                                | No downgrade                         | No downgrade                                      | Downgrade | LOW      |
| Dulo vs Traz | No downgrade                                                      | Downgrade because point estimate >1.0 but lower limit <0.80 | No downgrade                         | No downgrade                                      | Downgrade | LOW      |
| Dulo vs Venl | Downgrade because >70% contribution from moderate RoB comparisons | No downgrade                                                | Downgrade for side-splitting p=0.052 | No downgrade                                      | Downgrade | VERY LOW |
| Dulo vs Vort | No downgrade                                                      | No downgrade                                                | No downgrade                         | Downgrade because of concerns about transitivity. | Downgrade | LOW      |
| Esci vs Fluo | No downgrade                                                      | No downgrade                                                | No downgrade                         | No downgrade                                      | Downgrade | MODERATE |
| Esci vs Fluv | No downgrade                                                      | No downgrade                                                | No downgrade                         | No downgrade                                      | Downgrade | MODERATE |
| Esci vs Miln | No downgrade                                                      | No downgrade                                                | No downgrade                         | No downgrade                                      | Downgrade | MODERATE |
| Esci vs Mirt | No downgrade                                                      | No downgrade                                                | No downgrade                         | No downgrade                                      | Downgrade | MODERATE |
| Esci vs Nefa | Downgrade because >70% contribution from moderate RoB comparisons | No downgrade                                                | No downgrade                         | No downgrade                                      | Downgrade | LOW      |
| Esci vs Paro | No downgrade                                                      | No downgrade                                                | No downgrade                         | No downgrade                                      | Downgrade | MODERATE |
| Esci vs Rebo | No downgrade                                                      | No downgrade                                                | No downgrade                         | No downgrade                                      | Downgrade | MODERATE |
| Esci vs Sert | No downgrade                                                      | No downgrade                                                | No downgrade                         | No downgrade                                      | Downgrade | MODERATE |
| Esci vs Traz | No downgrade                                                      | No downgrade                                                | No downgrade                         | No downgrade                                      | Downgrade | MODERATE |
| Esci vs Venl | No downgrade                                                      | No downgrade                                                | No downgrade                         | No downgrade                                      | Downgrade | MODERATE |

|              |                                                                   |                                                             |              |                                                   |           |          |
|--------------|-------------------------------------------------------------------|-------------------------------------------------------------|--------------|---------------------------------------------------|-----------|----------|
| Esci vs Vort | No downgrade                                                      | Downgrade because point estimate >1.0 but lower limit <0.80 | No downgrade | Downgrade because of concerns about transitivity. | Downgrade | VERY LOW |
| Fluo vs Fluv | No downgrade                                                      | No downgrade                                                | No downgrade | No downgrade                                      | Downgrade | MODERATE |
| Fluo vs Miln | No downgrade                                                      | No downgrade                                                | No downgrade | No downgrade                                      | Downgrade | MODERATE |
| Fluo vs Mirt | No downgrade                                                      | No downgrade                                                | No downgrade | No downgrade                                      | Downgrade | MODERATE |
| Fluo vs Nefa | Downgrade because >70% contribution from moderate RoB comparisons | No downgrade                                                | No downgrade | No downgrade                                      | Downgrade | LOW      |
| Fluo vs Paro | No downgrade                                                      | No downgrade                                                | No downgrade | No downgrade                                      | Downgrade | MODERATE |
| Fluo vs Rebo | Downgrade because >70% contribution from moderate RoB comparisons | No downgrade                                                | No downgrade | No downgrade                                      | Downgrade | LOW      |
| Fluo vs Sert | Downgrade because >70% contribution from moderate RoB comparisons | No downgrade                                                | No downgrade | No downgrade                                      | Downgrade | LOW      |
| Fluo vs Traz | No downgrade                                                      | No downgrade                                                | No downgrade | No downgrade                                      | Downgrade | MODERATE |
| Fluo vs Venl | Downgrade because >70% contribution from moderate RoB comparisons | No downgrade                                                | No downgrade | No downgrade                                      | Downgrade | LOW      |
| Fluo vs Vort | No downgrade                                                      | No downgrade                                                | No downgrade | Downgrade because of concerns about transitivity. | Downgrade | LOW      |
| Fluv vs Miln | Downgrade because >70% contribution from moderate RoB comparisons | No downgrade                                                | No downgrade | No downgrade                                      | Downgrade | LOW      |
| Fluv vs Mirt | No downgrade                                                      | No downgrade                                                | No downgrade | No downgrade                                      | Downgrade | MODERATE |
| Fluv vs Nefa | Downgrade because >70% contribution from moderate RoB comparisons | Downgrade because point estimate >1.0 but lower limit <0.80 | No downgrade | No downgrade                                      | Downgrade | VERY LOW |
| Fluv vs Paro | No downgrade                                                      | No downgrade                                                | No downgrade | No downgrade                                      | Downgrade | MODERATE |
| Fluv vs Rebo | Downgrade because >70% contribution from moderate RoB comparisons | No downgrade                                                | No downgrade | No downgrade                                      | Downgrade | LOW      |
| Fluv vs Sert | No downgrade                                                      | No downgrade                                                | No downgrade | No downgrade                                      | Downgrade | MODERATE |

|              |                                                                   |                                                             |              |                                                   |           |          |
|--------------|-------------------------------------------------------------------|-------------------------------------------------------------|--------------|---------------------------------------------------|-----------|----------|
| Fluv vs Traz | Downgrade because >70% contribution from moderate RoB comparisons | Downgrade because point estimate >1.0 but lower limit <0.80 | No downgrade | No downgrade                                      | Downgrade | VERY LOW |
| Fluv vs Venl | No downgrade                                                      | No downgrade                                                | No downgrade | No downgrade                                      | Downgrade | MODERATE |
| Fluv vs Vort | No downgrade                                                      | No downgrade                                                | No downgrade | Downgrade because of concerns about transitivity. | Downgrade | LOW      |
| Miln vs Mirt | No downgrade                                                      | Downgrade because point estimate >1.0 but lower limit <0.80 | No downgrade | No downgrade                                      | Downgrade | LOW      |
| Miln vs Nefa | Downgrade because >70% contribution from moderate RoB comparisons | Downgrade because point estimate <1.0 but upper limit >1.25 | No downgrade | No downgrade                                      | Downgrade | VERY LOW |
| Miln vs Paro | Downgrade because >70% contribution from moderate RoB comparisons | Downgrade because point estimate <1.0 but upper limit >1.25 | No downgrade | No downgrade                                      | Downgrade | VERY LOW |
| Miln vs Rebo | Downgrade because >70% contribution from moderate RoB comparisons | No downgrade                                                | No downgrade | No downgrade                                      | Downgrade | LOW      |
| Miln vs Sert | No downgrade                                                      | No downgrade                                                | No downgrade | No downgrade                                      | Downgrade | MODERATE |
| Miln vs Traz | No downgrade                                                      | No downgrade                                                | No downgrade | No downgrade                                      | Downgrade | MODERATE |
| Miln vs Venl | No downgrade                                                      | No downgrade                                                | No downgrade | No downgrade                                      | Downgrade | MODERATE |
| Miln vs Vort | No downgrade                                                      | No downgrade                                                | No downgrade | Downgrade because of concerns about transitivity. | Downgrade | LOW      |
| Mirt vs Nefa | No downgrade                                                      | Downgrade because point estimate <1.0 but upper limit >1.25 | No downgrade | No downgrade                                      | Downgrade | LOW      |
| Mirt vs Paro | No downgrade                                                      | No downgrade                                                | No downgrade | No downgrade                                      | Downgrade | MODERATE |
| Mirt vs Rebo | No downgrade                                                      | No downgrade                                                | No downgrade | No downgrade                                      | Downgrade | MODERATE |
| Mirt vs Sert | No downgrade                                                      | No downgrade                                                | No downgrade | No downgrade                                      | Downgrade | MODERATE |
| Mirt vs Traz | No downgrade                                                      | No downgrade                                                | No downgrade | No downgrade                                      | Downgrade | MODERATE |
| Mirt vs Venl | No downgrade                                                      | No downgrade                                                | No downgrade | No downgrade                                      | Downgrade | MODERATE |
| Mirt vs Vort | No downgrade                                                      | No downgrade                                                | No downgrade | Downgrade because of concerns about transitivity. | Downgrade | LOW      |



|              |                                                                   |                                                             |              |                                                   |           |          |
|--------------|-------------------------------------------------------------------|-------------------------------------------------------------|--------------|---------------------------------------------------|-----------|----------|
| Nefa vs Paro | Downgrade because >70% contribution from moderate RoB comparisons | Downgrade because point estimate >1.0 but lower limit <0.80 | No downgrade | No downgrade                                      | Downgrade | VERY LOW |
| Nefa vs Rebo | Downgrade because >70% contribution from moderate RoB comparisons | Downgrade because point estimate <1.0 but upper limit >1.25 | No downgrade | No downgrade                                      | Downgrade | VERY LOW |
| Nefa vs Sert | Downgrade because >70% contribution from moderate RoB comparisons | No downgrade                                                | No downgrade | No downgrade                                      | Downgrade | LOW      |
| Nefa vs Traz | Downgrade because >70% contribution from moderate RoB comparisons | Downgrade because point estimate <1.0 but upper limit >1.25 | No downgrade | No downgrade                                      | Downgrade | VERY LOW |
| Nefa vs Venl | Downgrade because >70% contribution from moderate RoB comparisons | Downgrade because point estimate <1.0 but upper limit >1.25 | No downgrade | No downgrade                                      | Downgrade | VERY LOW |
| Nefa vs Vort | No downgrade                                                      | No downgrade                                                | No downgrade | Downgrade because of concerns about transitivity. | Downgrade | LOW      |
| Paro vs Rebo | Downgrade because >70% contribution from moderate RoB comparisons | No downgrade                                                | No downgrade | No downgrade                                      | Downgrade | LOW      |
| Paro vs Sert | No downgrade                                                      | No downgrade                                                | No downgrade | No downgrade                                      | Downgrade | MODERATE |
| Paro vs Traz | No downgrade                                                      | No downgrade                                                | No downgrade | No downgrade                                      | Downgrade | MODERATE |
| Paro vs Venl | No downgrade                                                      | No downgrade                                                | No downgrade | No downgrade                                      | Downgrade | MODERATE |
| Paro vs Vort | No downgrade                                                      | No downgrade                                                | No downgrade | Downgrade because of concerns about transitivity. | Downgrade | LOW      |
| Rebo vs Sert | Downgrade because >70% contribution from moderate RoB comparisons | No downgrade                                                | No downgrade | No downgrade                                      | Downgrade | LOW      |
| Rebo vs Traz | Downgrade because >70% contribution from moderate RoB comparisons | No downgrade                                                | No downgrade | No downgrade                                      | Downgrade | LOW      |
| Rebo vs Venl | Downgrade because >70% contribution from moderate RoB comparisons | No downgrade                                                | No downgrade | No downgrade                                      | Downgrade | LOW      |

|              |                                                                   |                                                             |              |                                                   |           |          |
|--------------|-------------------------------------------------------------------|-------------------------------------------------------------|--------------|---------------------------------------------------|-----------|----------|
| Rebo vs Vort | No downgrade                                                      | No downgrade                                                | No downgrade | Downgrade because of concerns about transitivity. | Downgrade | LOW      |
| Sert vs Traz | No downgrade                                                      | No downgrade                                                | No downgrade | No downgrade                                      | Downgrade | MODERATE |
| Sert vs Venl | No downgrade                                                      | No downgrade                                                | No downgrade | No downgrade                                      | Downgrade | MODERATE |
| Sert vs Vort | No downgrade                                                      | No downgrade                                                | No downgrade | Downgrade because of concerns about transitivity. | Downgrade | LOW      |
| Traz vs Venl | Downgrade because >70% contribution from moderate RoB comparisons | Downgrade because point estimate >1.0 but lower limit <0.80 | No downgrade | No downgrade                                      | Downgrade | VERY LOW |
| Traz vs Vort | No downgrade                                                      | No downgrade                                                | No downgrade | Downgrade because of concerns about transitivity. | Downgrade | LOW      |
| Venl vs Vort | No downgrade                                                      | No downgrade                                                | No downgrade | Downgrade because of concerns about transitivity. | Downgrade | LOW      |

## 10 SUCRA and cumulative probability plots

### 10.1 All trials

474 studies (with at least two arms at licensed dose), 106 966 participants

#### 10.1.1 Response

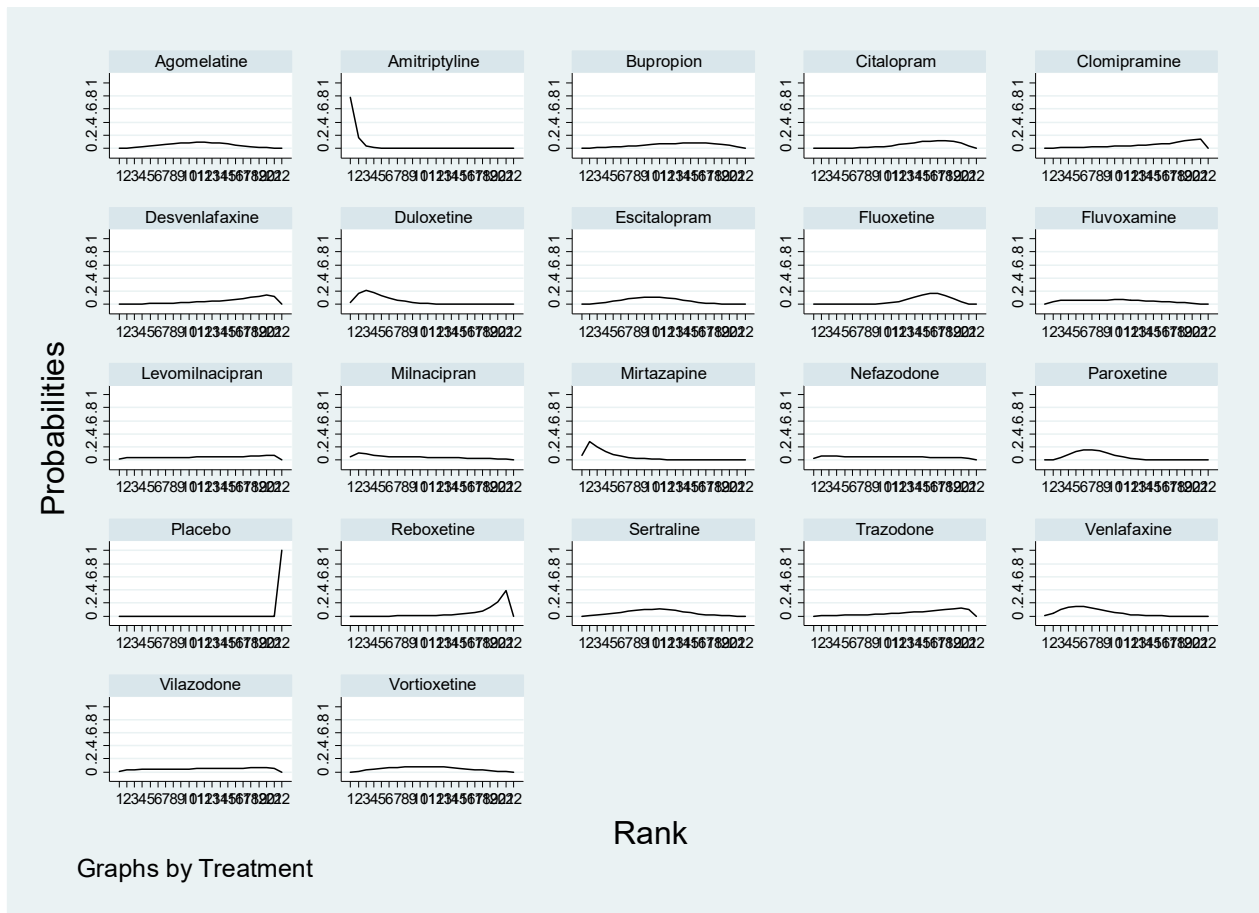

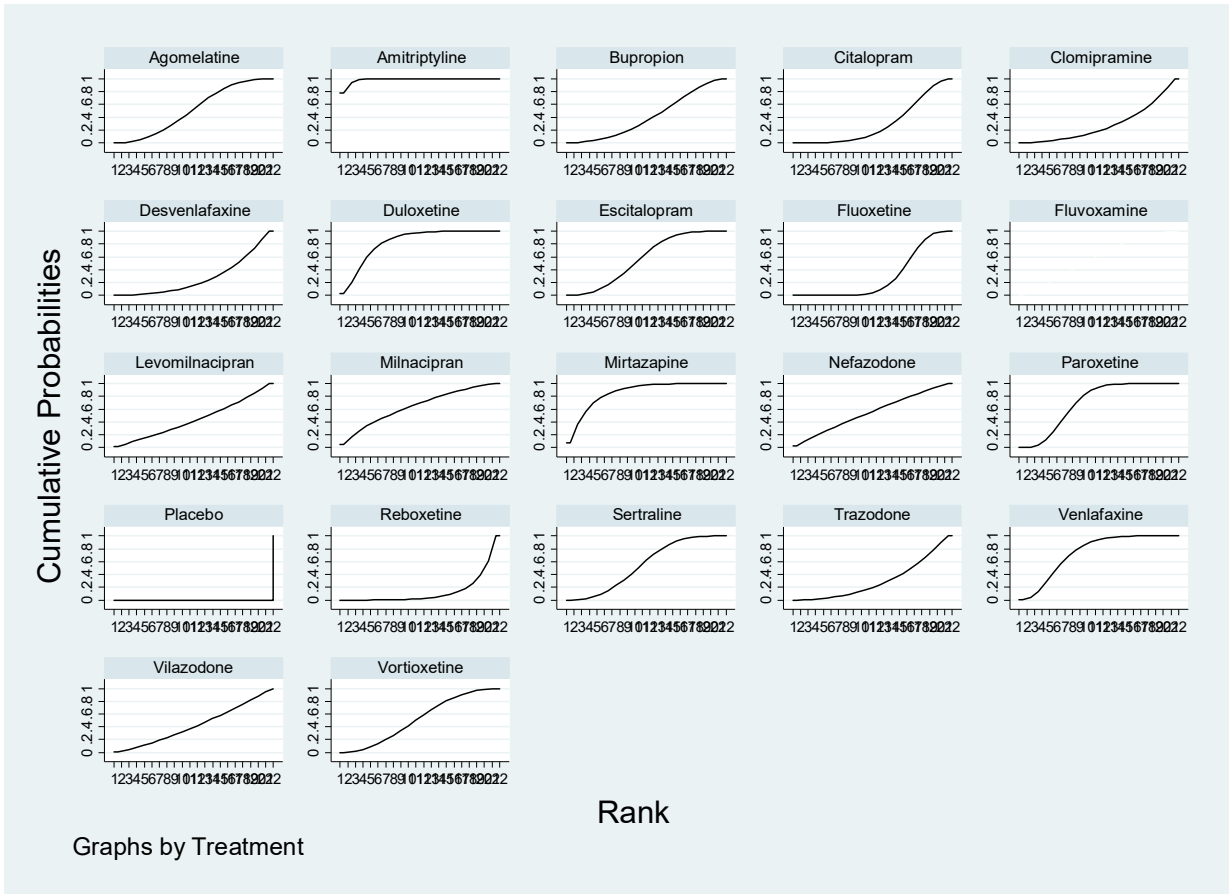

| Treatment       | SUCRA | PrBest | MeanRank |
|-----------------|-------|--------|----------|
| Placebo         | 0.0   | 0.0    | 22.0     |
| Agomelatine     | 51.6  | 0.0    | 11.2     |
| Amitriptyline   | 98.6  | 78.1   | 1.3      |
| Bupropion       | 41.4  | 0.1    | 13.3     |
| Citalopram      | 30.4  | 0.0    | 15.6     |
| Clomipramine    | 29.4  | 0.1    | 15.8     |
| Desvenlafaxine  | 27.7  | 0.0    | 16.2     |
| Duloxetine      | 83.0  | 2.6    | 4.6      |
| Escitalopram    | 56.9  | 0.0    | 10.0     |
| Fluoxetine      | 29.2  | 0.0    | 15.9     |
| Fluvoxamine     | 58.1  | 0.7    | 9.8      |
| Levomilnacipran | 44.5  | 1.6    | 12.7     |
| Milnacipran     | 64.6  | 5.2    | 8.4      |
| Mirtazapine     | 85.7  | 7.6    | 4.0      |
| Nefazodone      | 55.3  | 2.7    | 10.4     |
| Paroxetine      | 70.1  | 0.0    | 7.3      |
| Reboxetine      | 13.6  | 0.0    | 19.1     |
| Sertraline      | 55.2  | 0.0    | 10.4     |
| Trazodone       | 30.8  | 0.0    | 15.5     |
| Venlafaxine     | 74.3  | 0.2    | 6.4      |
| Vilazodone      | 45.2  | 0.9    | 12.5     |
| Vortioxetine    | 54.6  | 0.2    | 10.5     |

## 10.1.2 Dropouts for any reason

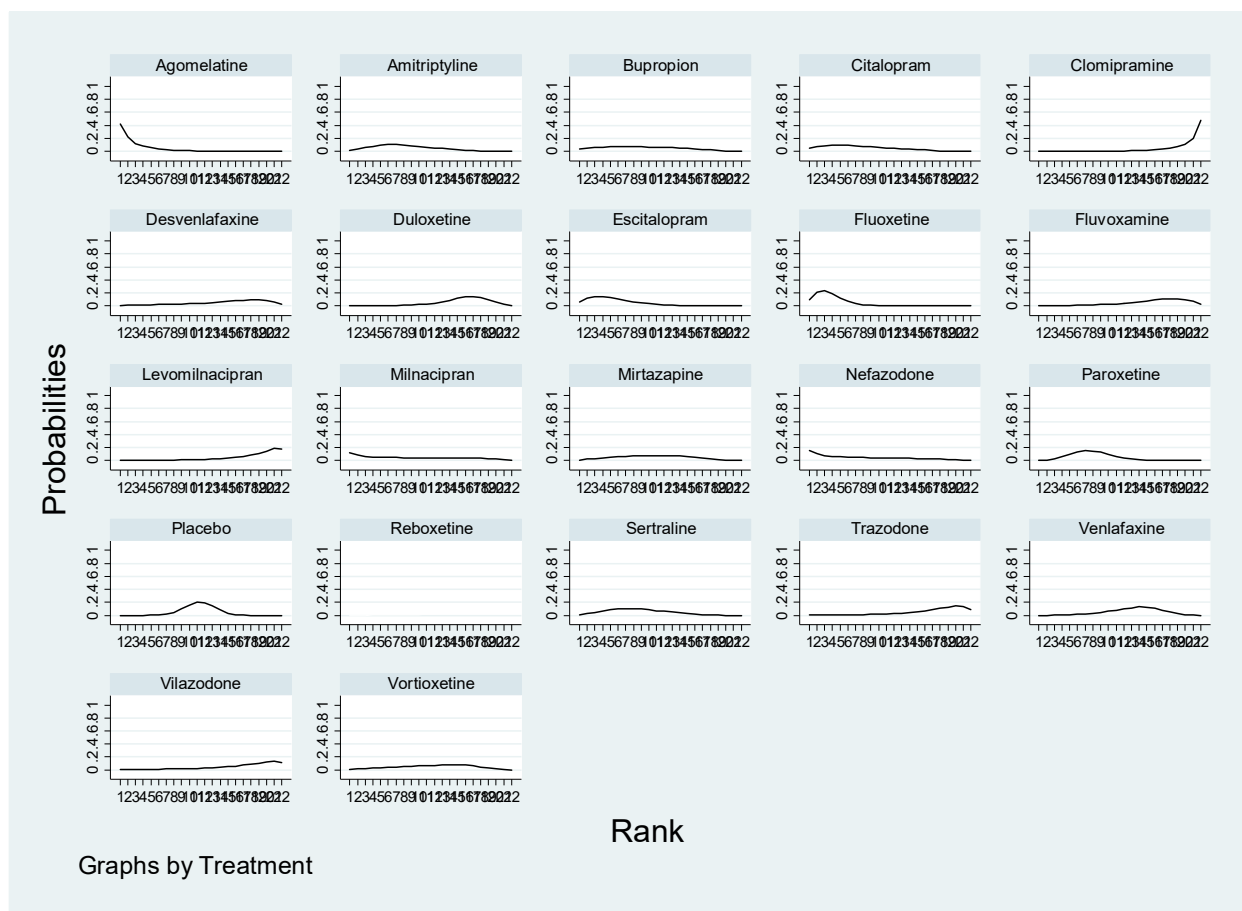

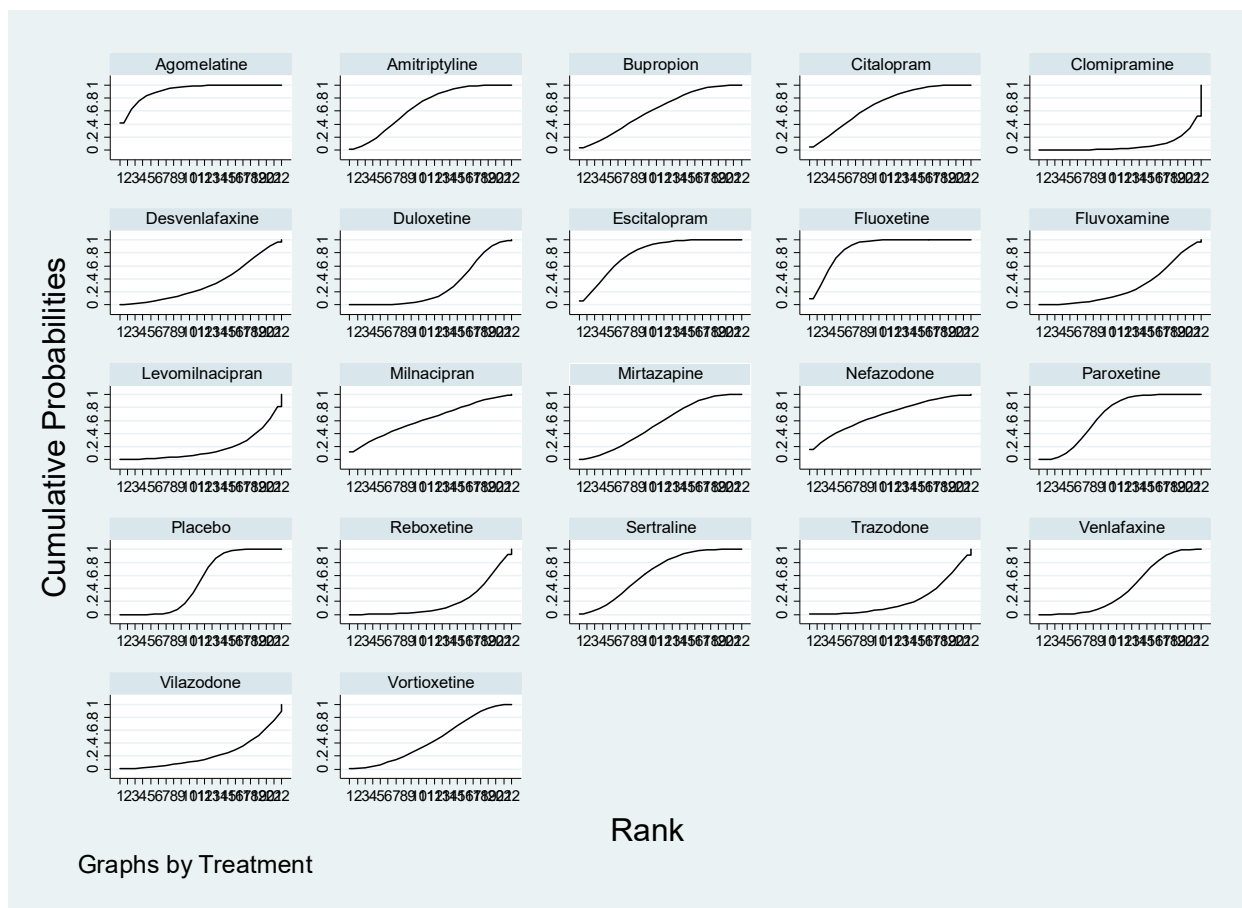

| Treatment       | SUCRA | PrBest | MeanRank |
|-----------------|-------|--------|----------|
| Placebo         | 50.7  | 0.0    | 11.3     |
| Agomelatine     | 91.9  | 41.3   | 2.7      |
| Amitriptyline   | 66.9  | 1.7    | 8.0      |
| Bupropion       | 61.6  | 3.1    | 9.1      |
| Citalopram      | 69.7  | 5.2    | 7.4      |
| Clomipramine    | 7.9   | 0.0    | 20.3     |
| Desvenlafaxine  | 34.1  | 0.6    | 14.8     |
| Duloxetine      | 29.5  | 0.0    | 15.8     |
| Escitalopram    | 79.5  | 6.5    | 5.3      |
| Fluoxetine      | 87.4  | 9.1    | 3.6      |
| Fluvoxamine     | 28.9  | 0.1    | 15.9     |
| Levomilnacipran | 18.0  | 0.2    | 18.2     |
| Milnacipran     | 62.3  | 12.6   | 8.9      |
| Mirtazapine     | 55.1  | 1.0    | 10.4     |
| Nefazodone      | 69.0  | 15.9   | 7.5      |
| Paroxetine      | 67.4  | 0.1    | 7.8      |
| Reboxetine      | 19.7  | 0.0    | 17.9     |
| Sertraline      | 64.2  | 1.1    | 8.5      |
| Trazodone       | 22.2  | 0.1    | 17.3     |
| Venlafaxine     | 40.8  | 0.0    | 13.4     |
| Vilazodone      | 25.1  | 0.6    | 16.7     |
| Vortioxetine    | 47.9  | 0.7    | 11.9     |

### 10.1.3 Efficacy as continuous outcome

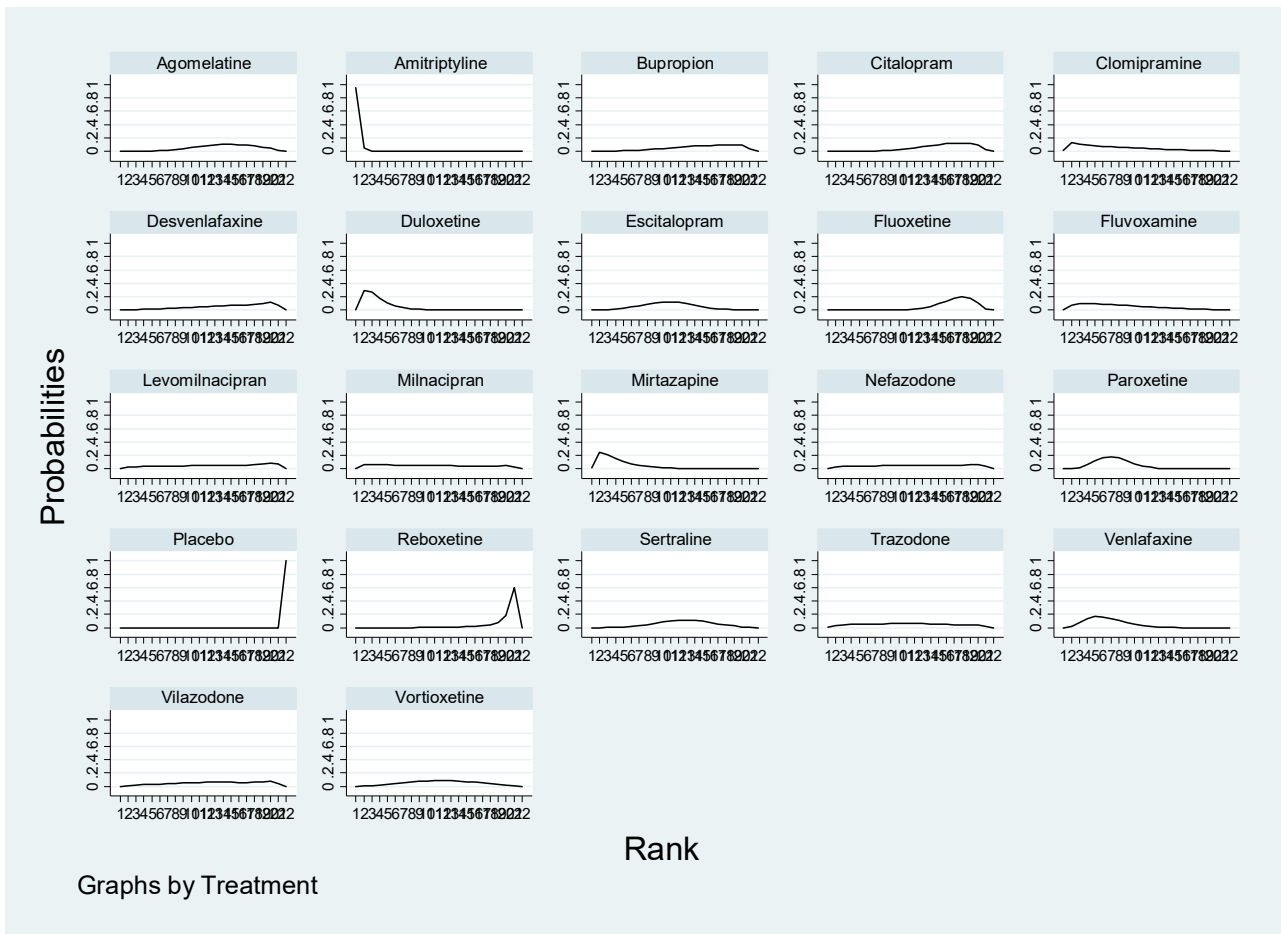

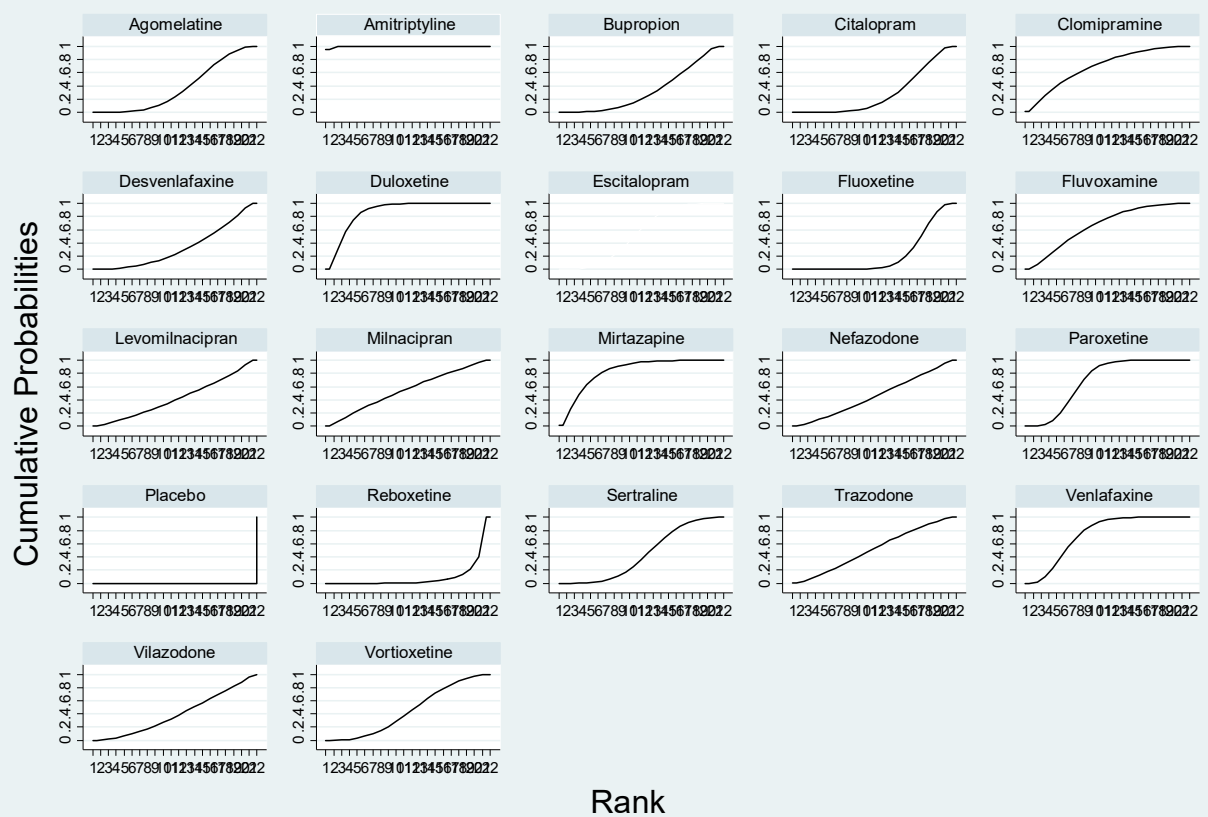

Graphs by Treatment

| Treatment       | SUCRA | PrBest | MeanRank |
|-----------------|-------|--------|----------|
| Placebo         | 0.0   | 0.0    | 22.0     |
| Agomelatine     | 37.5  | 0.0    | 14.1     |
| Amitriptyline   | 99.7  | 94.7   | 1.1      |
| Bupropion       | 33.0  | 0.0    | 15.1     |
| Citalopram      | 29.0  | 0.0    | 15.9     |
| Clomipramine    | 69.3  | 1.5    | 7.4      |
| Desvenlafaxine  | 33.1  | 0.0    | 15.0     |
| Duloxetine      | 87.2  | 0.9    | 3.7      |
| Escitalopram    | 54.1  | 0.0    | 10.6     |
| Fluoxetine      | 22.9  | 0.0    | 17.2     |
| Fluvoxamine     | 66.7  | 0.4    | 8.0      |
| Levomilnacipran | 42.9  | 0.3    | 13.0     |
| Milnacipran     | 55.0  | 0.7    | 10.5     |
| Mirtazapine     | 83.6  | 1.2    | 4.4      |
| Nefazodone      | 46.4  | 0.2    | 12.3     |
| Paroxetine      | 69.7  | 0.0    | 7.4      |
| Reboxetine      | 9.7   | 0.0    | 20.0     |
| Sertraline      | 44.1  | 0.0    | 12.7     |
| Trazodone       | 51.7  | 0.2    | 11.1     |
| Venlafaxine     | 74.0  | 0.0    | 6.5      |
| Vilazodone      | 42.8  | 0.1    | 13.0     |
| Vortioxetine    | 47.6  | 0.0    | 12.0     |



### 10.1.4 Remission

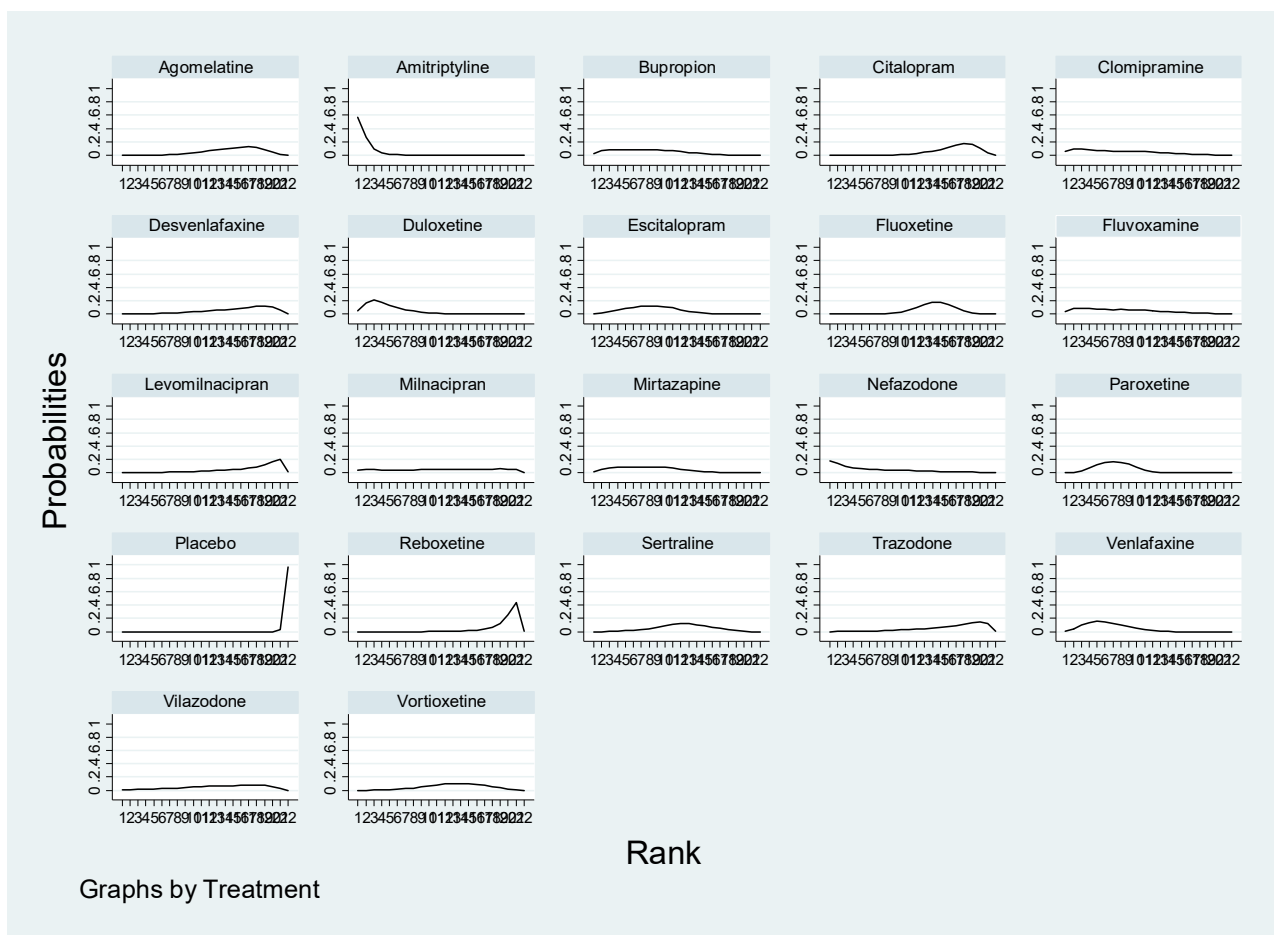

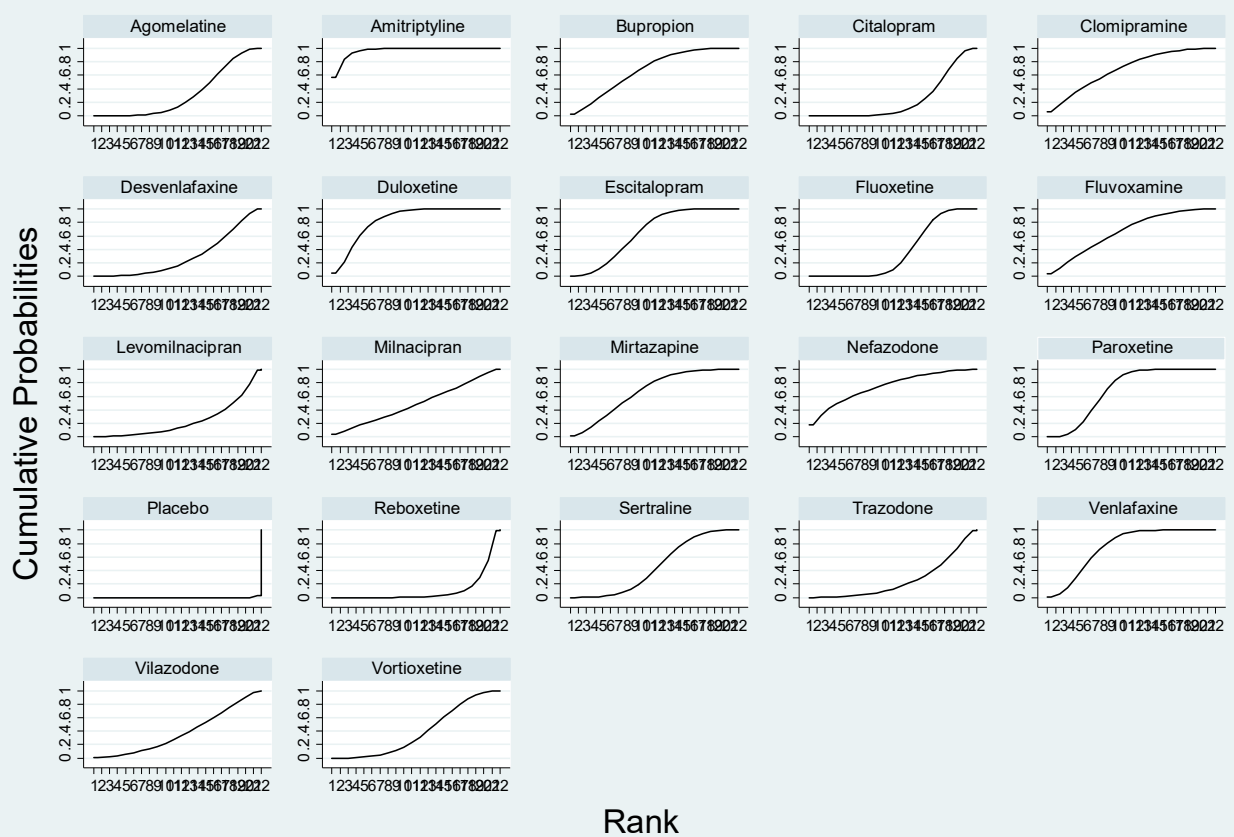

Graphs by Treatment

| Treatment       | SUCRA | PrBest | MeanRank |
|-----------------|-------|--------|----------|
| Placebo         | 0.1   | 0.0    | 22.0     |
| Agomelatine     | 32.4  | 0.0    | 15.2     |
| Amitriptyline   | 96.6  | 57.3   | 1.7      |
| Bupropion       | 68.0  | 2.7    | 7.7      |
| Citalopram      | 24.0  | 0.0    | 17.0     |
| Clomipramine    | 69.2  | 6.3    | 7.5      |
| Desvenlafaxine  | 29.9  | 0.0    | 15.7     |
| Duloxetine      | 83.9  | 5.1    | 4.4      |
| Escitalopram    | 65.3  | 0.2    | 8.3      |
| Fluoxetine      | 36.5  | 0.0    | 14.3     |
| Fluvoxamine     | 66.7  | 4.1    | 8.0      |
| Levomilnacipran | 24.0  | 0.2    | 17.0     |
| Milnacipran     | 49.6  | 3.6    | 11.6     |
| Mirtazapine     | 67.7  | 1.6    | 7.8      |
| Nefazodone      | 74.6  | 17.7   | 6.3      |
| Paroxetine      | 70.3  | 0.0    | 7.2      |
| Reboxetine      | 10.9  | 0.0    | 19.7     |
| Sertraline      | 46.3  | 0.0    | 12.3     |
| Trazodone       | 26.2  | 0.0    | 16.5     |
| Venlafaxine     | 75.3  | 0.6    | 6.2      |
| Vilazodone      | 40.7  | 0.5    | 13.5     |
| Vortioxetine    | 41.8  | 0.0    | 13.2     |

### 10.1.5 Dropouts due to adverse events

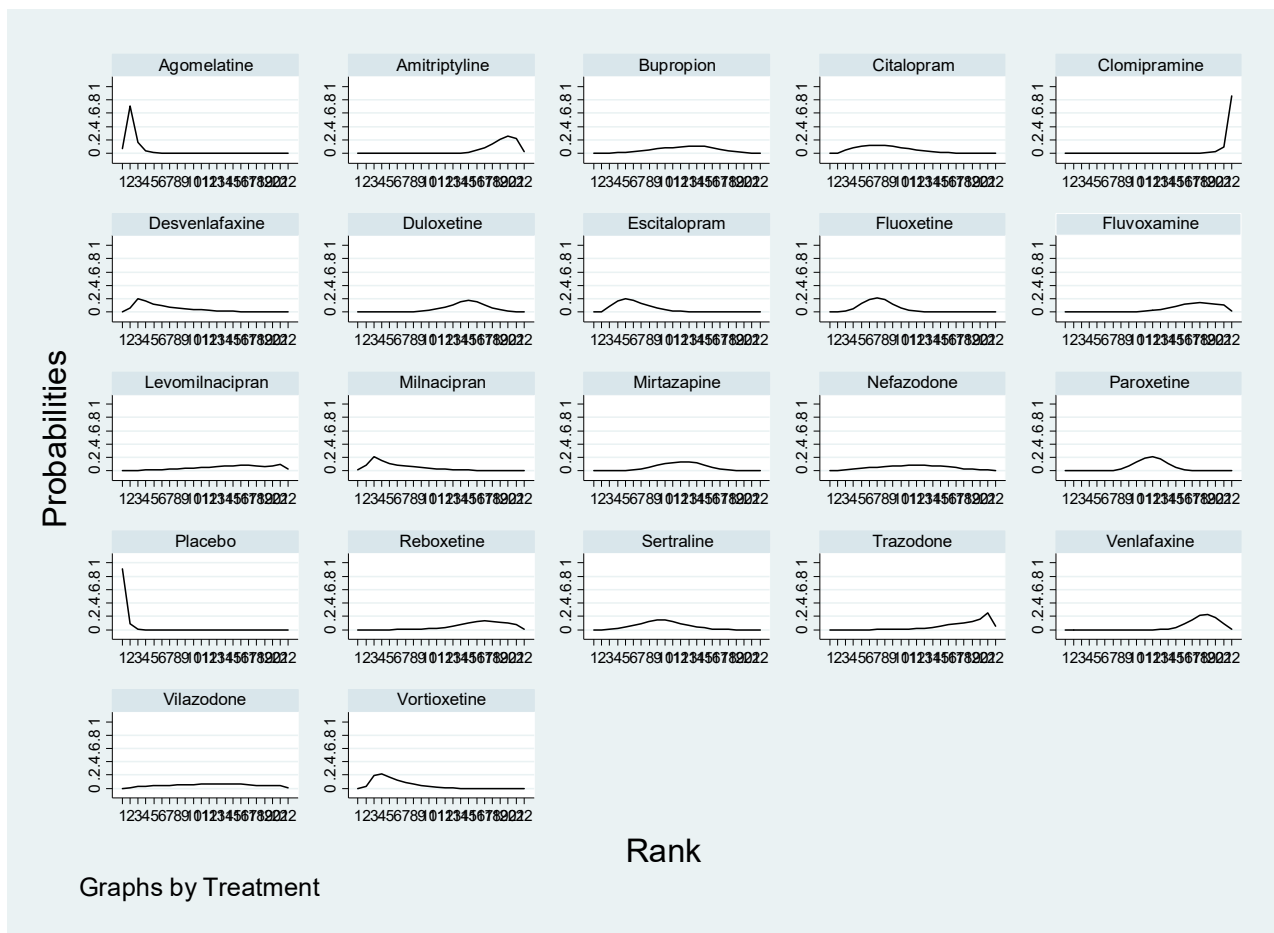

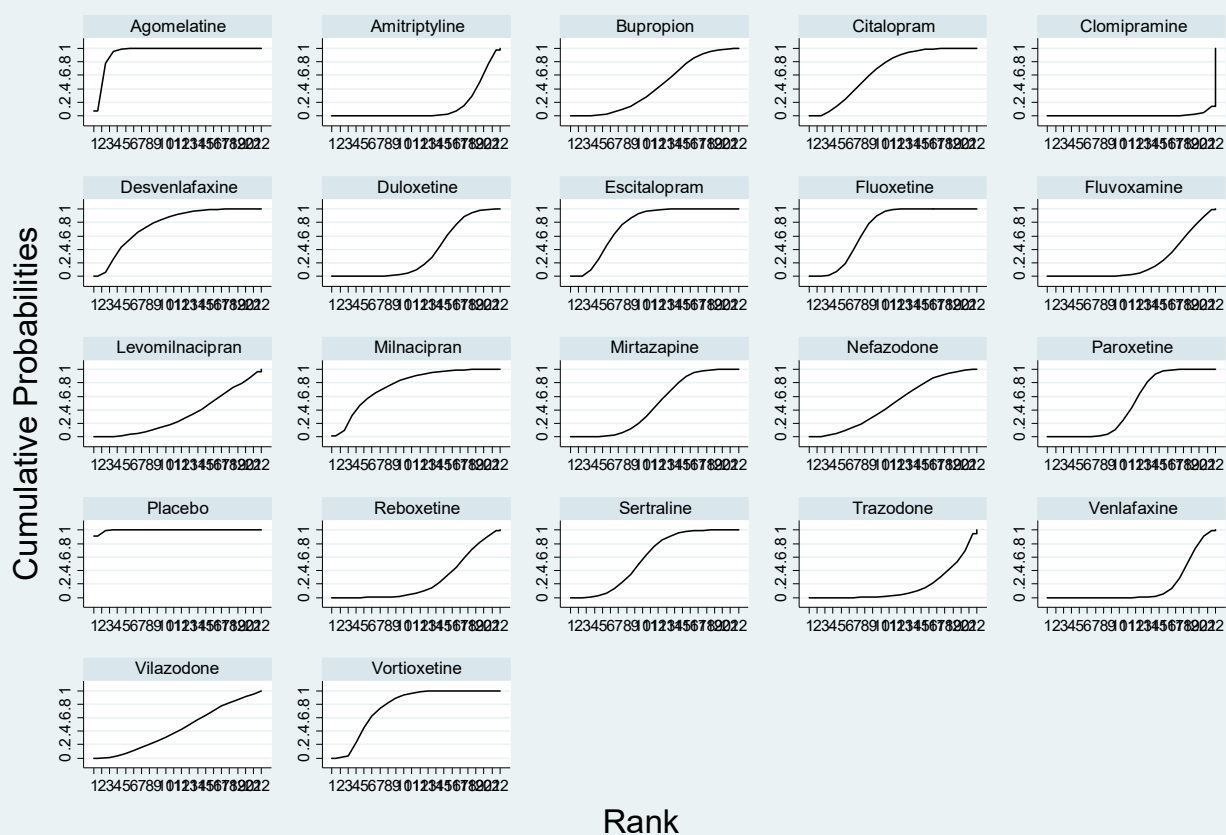

Graphs by Treatment

| Treatment       | SUCRA | PrBest | MeanRank |
|-----------------|-------|--------|----------|
| Placebo         | 99.6  | 91.0   | 1.1      |
| Agomelatine     | 94.2  | 7.3    | 2.2      |
| Amitriptyline   | 13.4  | 0.0    | 19.2     |
| Bupropion       | 44.6  | 0.0    | 12.6     |
| Citalopram      | 66.8  | 0.0    | 8.0      |
| Clomipramine    | 1.2   | 0.0    | 21.8     |
| Desvenlafaxine  | 76.1  | 0.4    | 6.0      |
| Duloxetine      | 34.7  | 0.0    | 14.7     |
| Escitalopram    | 75.9  | 0.0    | 6.1      |
| Fluoxetine      | 70.8  | 0.0    | 7.1      |
| Fluvoxamine     | 22.4  | 0.0    | 17.3     |
| Levomilnacipran | 33.3  | 0.0    | 15.0     |
| Milnacipran     | 76.6  | 1.2    | 5.9      |
| Mirtazapine     | 48.0  | 0.0    | 11.9     |
| Nefazodone      | 49.8  | 0.0    | 11.5     |
| Paroxetine      | 48.6  | 0.0    | 11.8     |
| Reboxetine      | 25.8  | 0.0    | 16.6     |
| Sertraline      | 59.0  | 0.0    | 9.6      |
| Trazodone       | 16.6  | 0.0    | 18.5     |
| Venlafaxine     | 17.3  | 0.0    | 18.4     |
| Vilazodone      | 46.0  | 0.0    | 12.3     |
| Vortioxetine    | 79.3  | 0.0    | 5.3      |

## 10.2 Head-to-head trials

194 studies (with at least two arms at licensed dose), 34 196 participants

### 10.2.1 Response

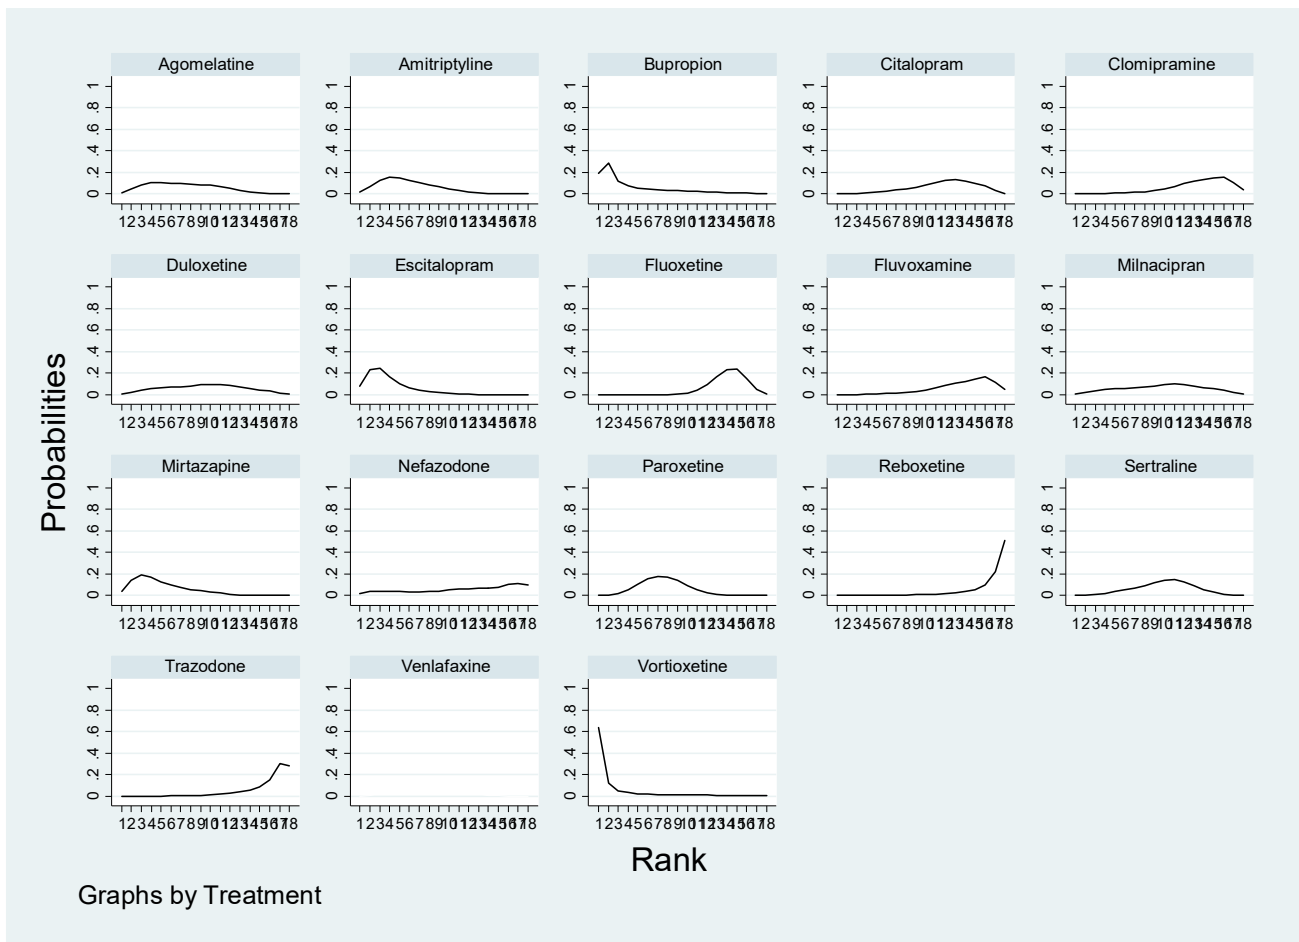

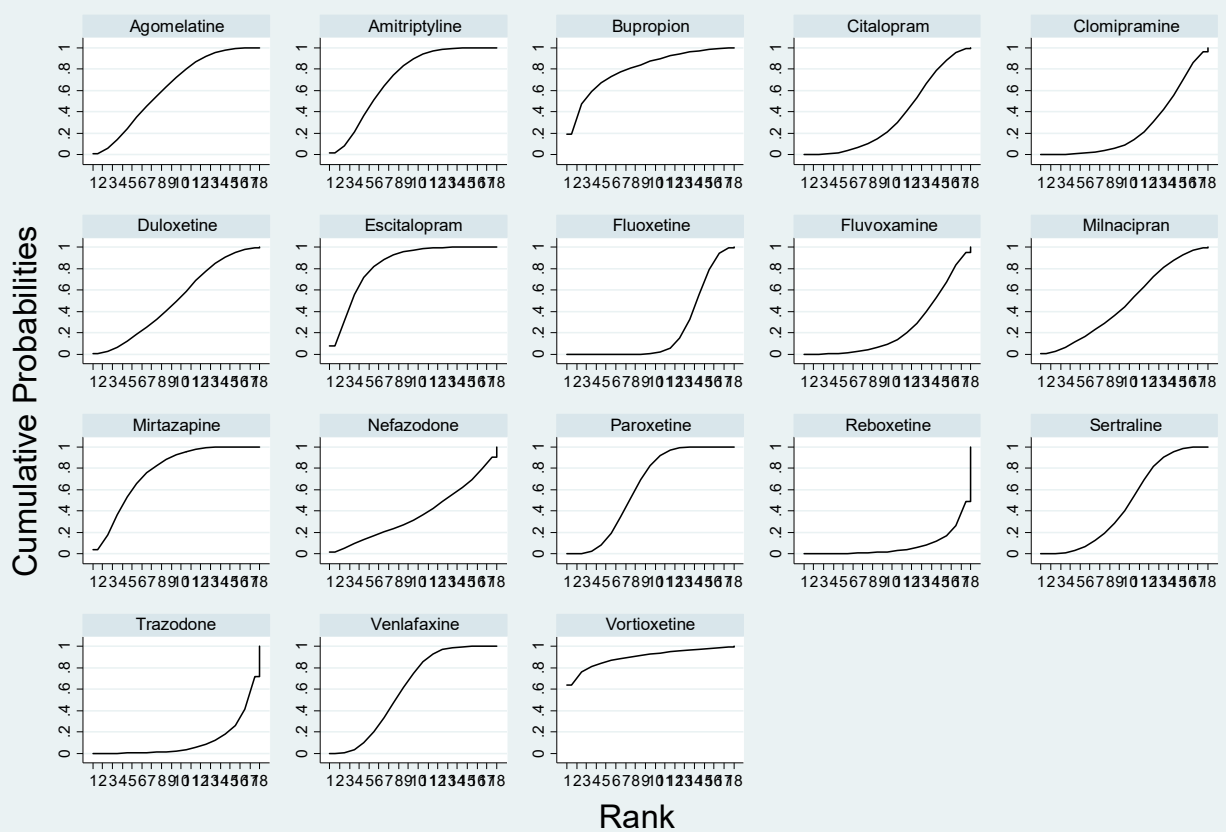

Graphs by Treatment

| Treatment     | SUCRA | PrBest | MeanRank |
|---------------|-------|--------|----------|
| Agomelatine   | 62.9  | 1.2    | 7.3      |
| Amitriptyline | 71.7  | 1.5    | 5.8      |
| Bupropion     | 80.3  | 19.5   | 4.4      |
| Citalopram    | 36.1  | 0.0    | 11.9     |
| Clomipramine  | 25.9  | 0.0    | 13.6     |
| Duloxetine    | 50.7  | 0.5    | 9.4      |
| Escitalopram  | 83.6  | 7.5    | 3.8      |
| Fluoxetine    | 22.7  | 0.0    | 14.1     |
| Fluvoxamine   | 25.1  | 0.0    | 13.7     |
| Milnacipran   | 48.2  | 0.7    | 9.8      |
| Mirtazapine   | 76.9  | 3.8    | 4.9      |
| Nefazodone    | 37.3  | 1.6    | 11.7     |
| Paroxetine    | 62.1  | 0.1    | 7.4      |
| Reboxetine    | 7.7   | 0.0    | 16.7     |
| Sertraline    | 47.1  | 0.0    | 10.0     |
| Trazodone     | 11.3  | 0.0    | 16.1     |
| Venlafaxine   | 60.3  | 0.0    | 7.7      |
| Vortioxetine  | 90.1  | 63.6   | 2.7      |

## 10.2.2 Dropouts for any reason

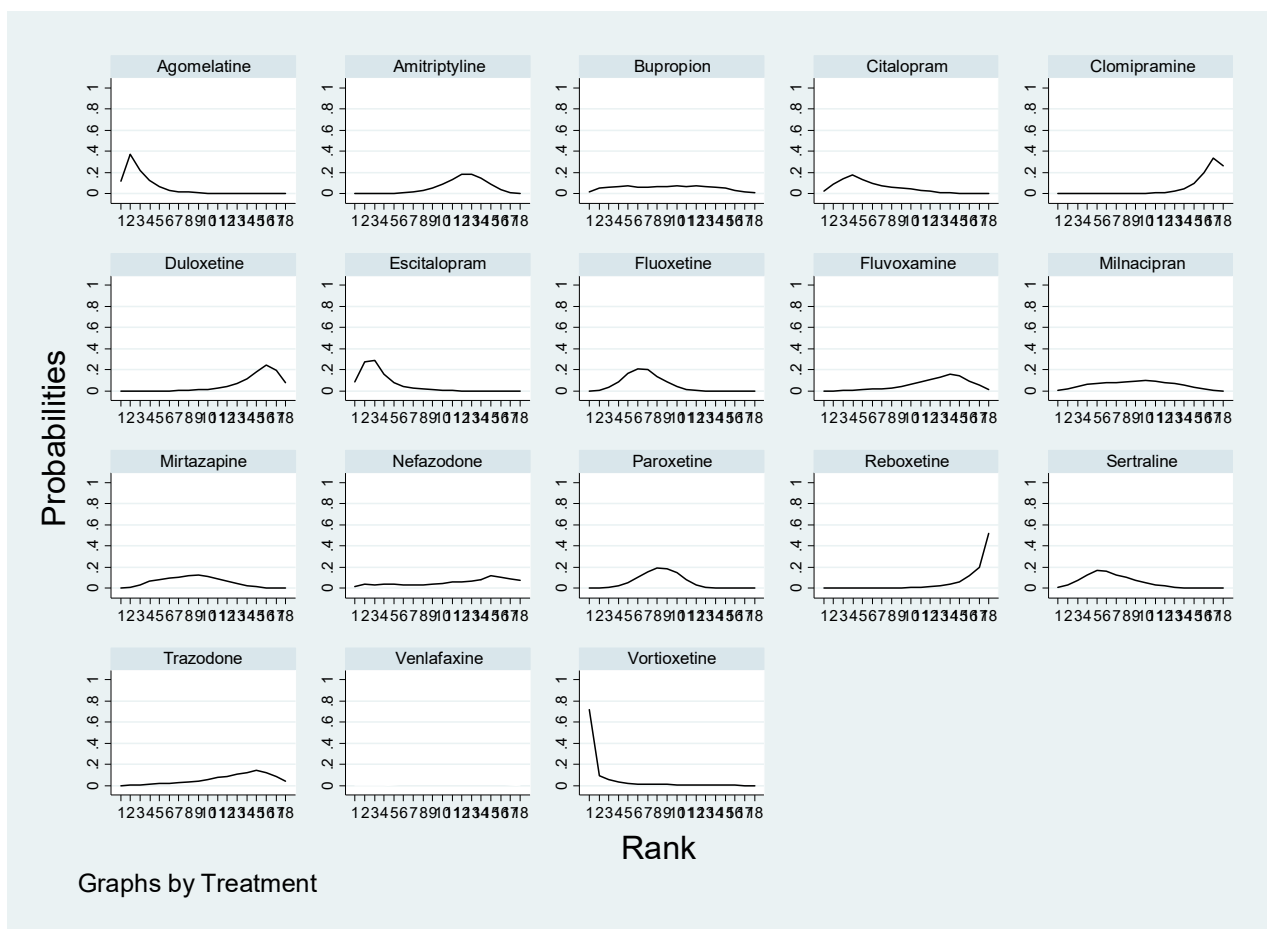

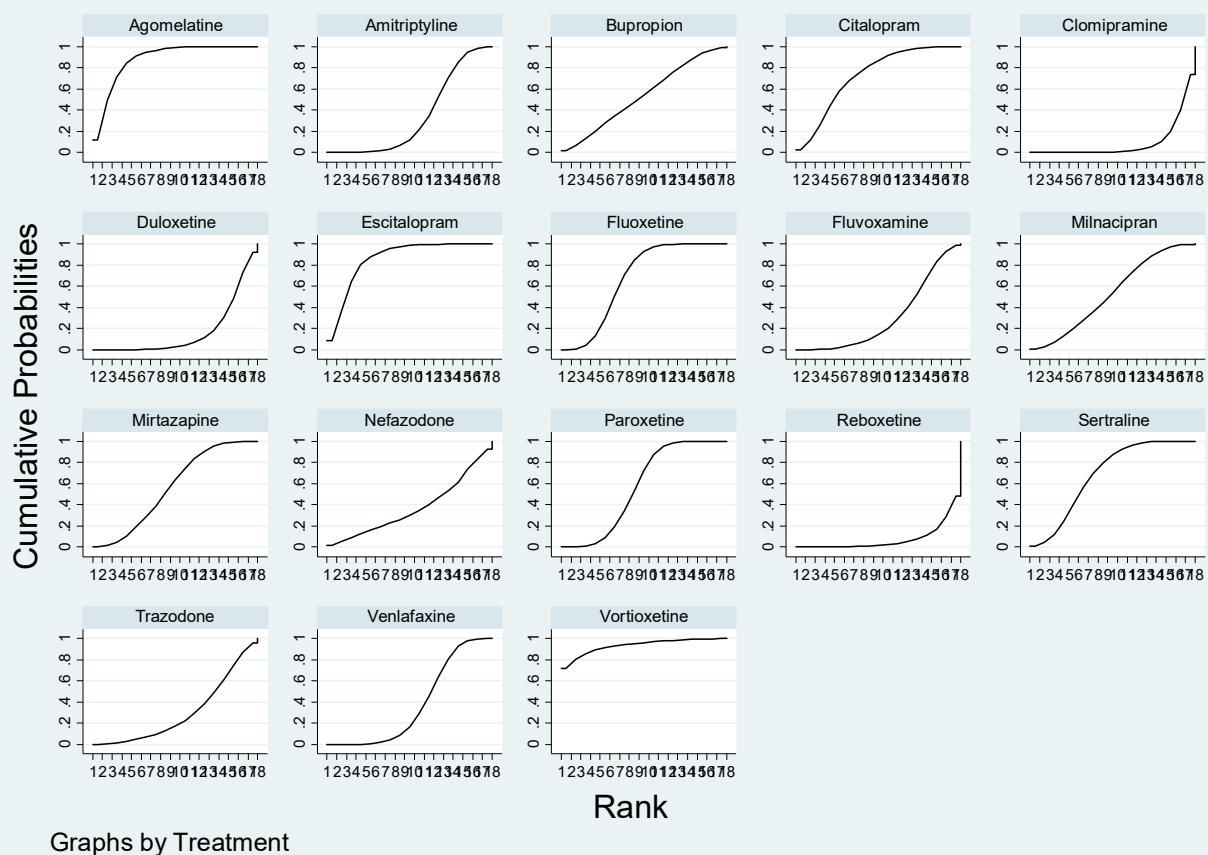

| Treatment     | SUCRA | PrBest | MeanRank |
|---------------|-------|--------|----------|
| Agomelatine   | 88.1  | 12.3   | 3.0      |
| Amitriptyline | 34.3  | 0.0    | 12.2     |
| Bupropion     | 53.7  | 1.6    | 8.9      |
| Citalopram    | 72.7  | 2.5    | 5.6      |
| Clomipramine  | 9.2   | 0.0    | 16.4     |
| Duloxetine    | 17.1  | 0.0    | 15.1     |
| Escitalopram  | 85.9  | 8.7    | 3.4      |
| Fluoxetine    | 67.4  | 0.0    | 6.5      |
| Fluvoxamine   | 30.8  | 0.0    | 12.8     |
| Milnacipran   | 53.2  | 0.5    | 9.0      |
| Mirtazapine   | 56.4  | 0.2    | 8.4      |
| Nefazodone    | 36.8  | 1.4    | 11.7     |
| Paroxetine    | 57.2  | 0.0    | 8.3      |
| Reboxetine    | 7.5   | 0.0    | 16.7     |
| Sertraline    | 68.4  | 1.1    | 6.4      |
| Trazodone     | 30.3  | 0.1    | 12.9     |
| Venlafaxine   | 37.8  | 0.0    | 11.6     |
| Vortioxetine  | 93.3  | 71.5   | 2.1      |



### 10.2.3 Efficacy as continuous outcome

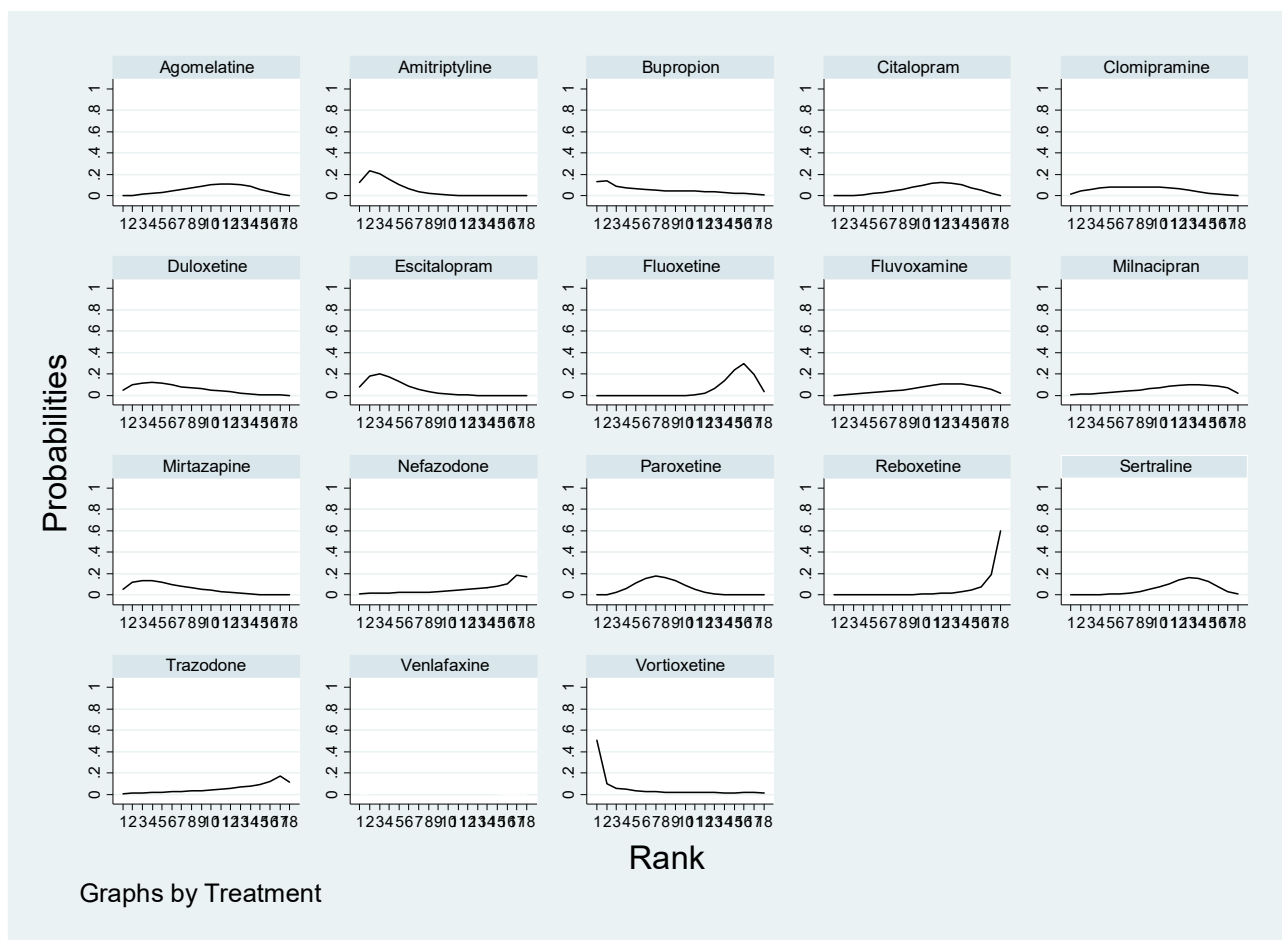

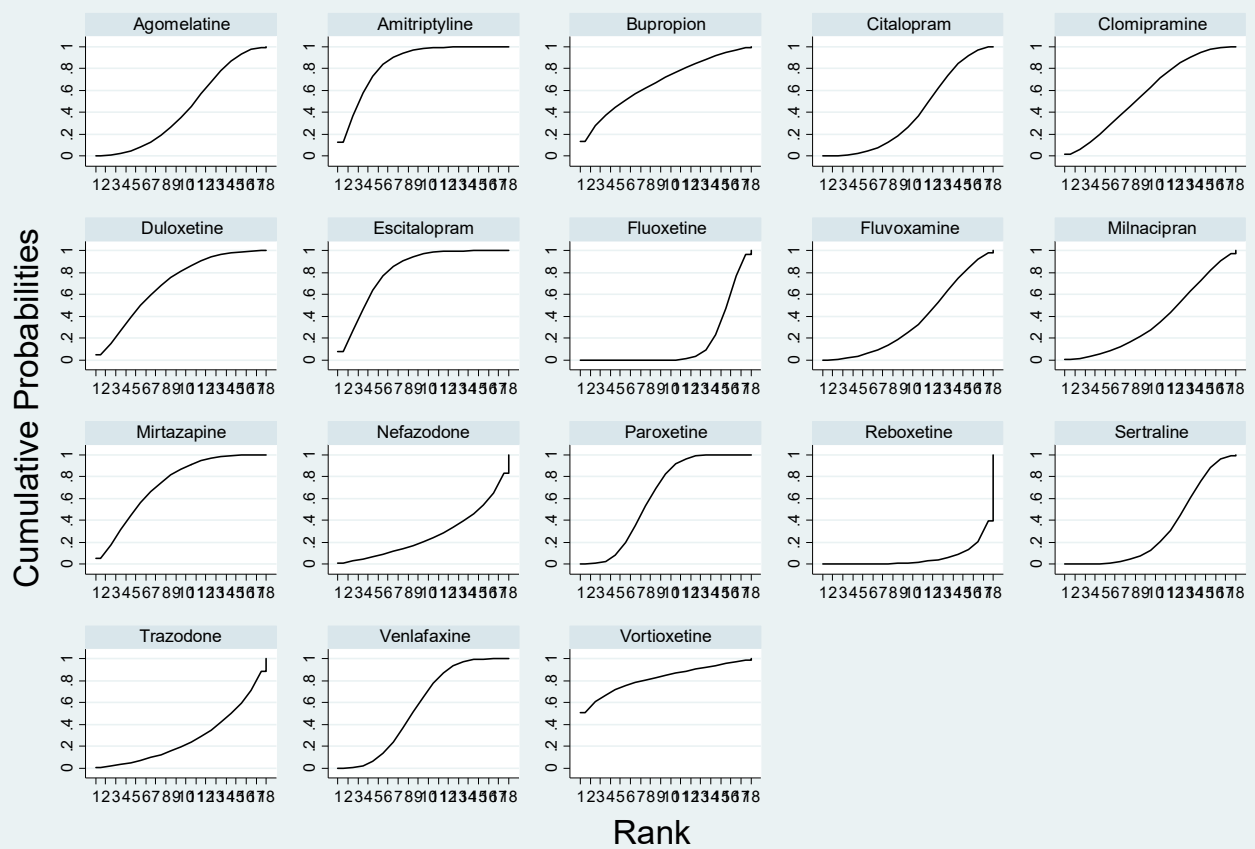

Graphs by Treatment

| Treatment     | SUCRA | PrBest | MeanRank |
|---------------|-------|--------|----------|
| Agomelatine   | 43.3  | 0.2    | 10.6     |
| Amitriptyline | 84.8  | 12.9   | 3.6      |
| Bupropion     | 67.5  | 13.4   | 6.5      |
| Citalopram    | 39.3  | 0.0    | 11.3     |
| Clomipramine  | 58.0  | 1.9    | 8.1      |
| Duloxetine    | 69.7  | 4.7    | 6.1      |
| Escitalopram  | 81.6  | 8.2    | 4.1      |
| Fluoxetine    | 15.1  | 0.0    | 15.4     |
| Fluvoxamine   | 36.6  | 0.1    | 11.8     |
| Milnacipran   | 37.4  | 0.4    | 11.6     |
| Mirtazapine   | 73.3  | 5.6    | 5.5      |
| Nefazodone    | 27.2  | 1.1    | 13.4     |
| Paroxetine    | 62.3  | 0.1    | 7.4      |
| Reboxetine    | 5.9   | 0.0    | 17.0     |
| Sertraline    | 32.0  | 0.0    | 12.6     |
| Trazodone     | 27.8  | 0.6    | 13.3     |
| Venlafaxine   | 56.2  | 0.1    | 8.4      |
| Vortioxetine  | 82.1  | 50.7   | 4.0      |

## 10.2.4 Remission

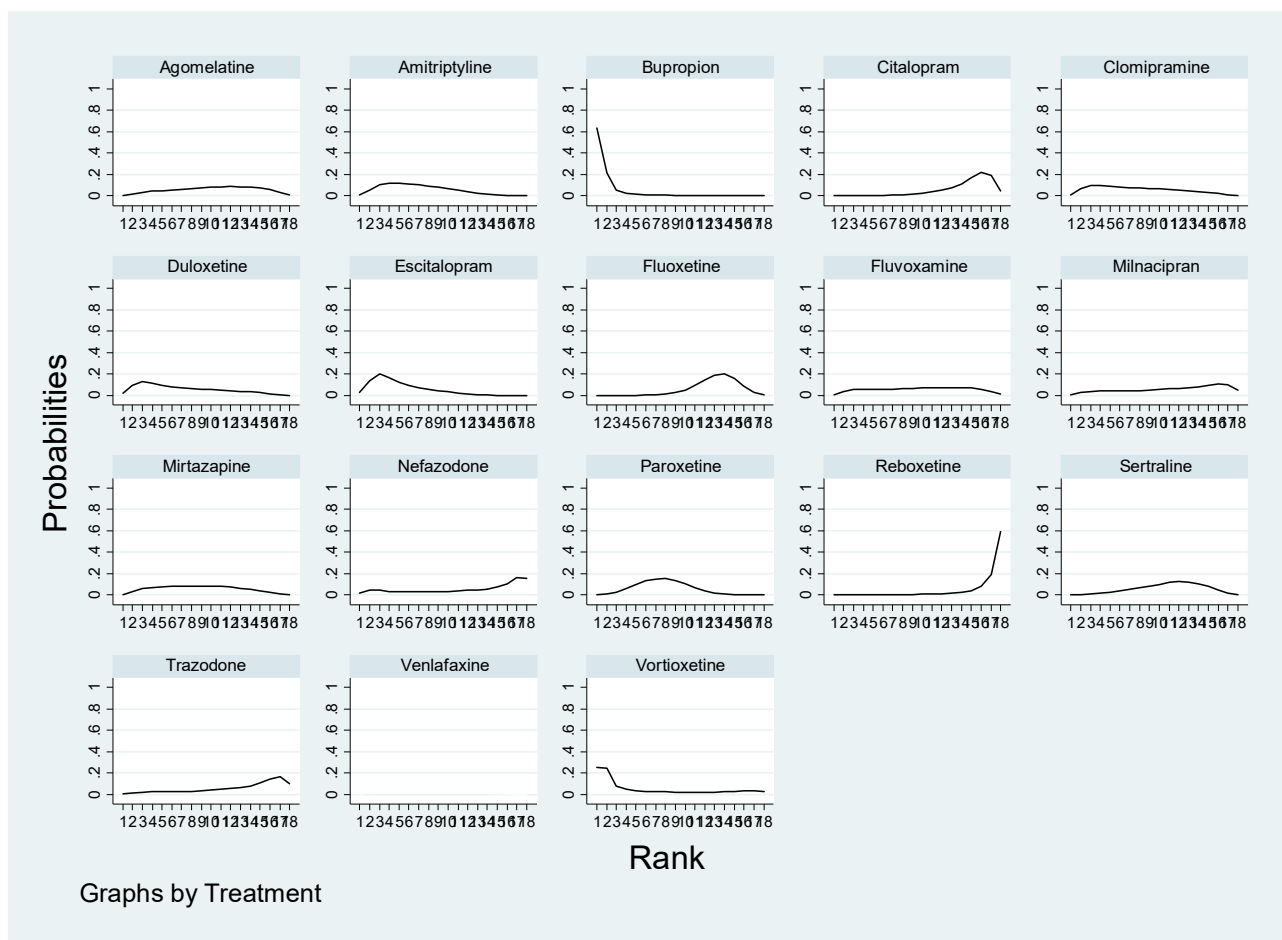

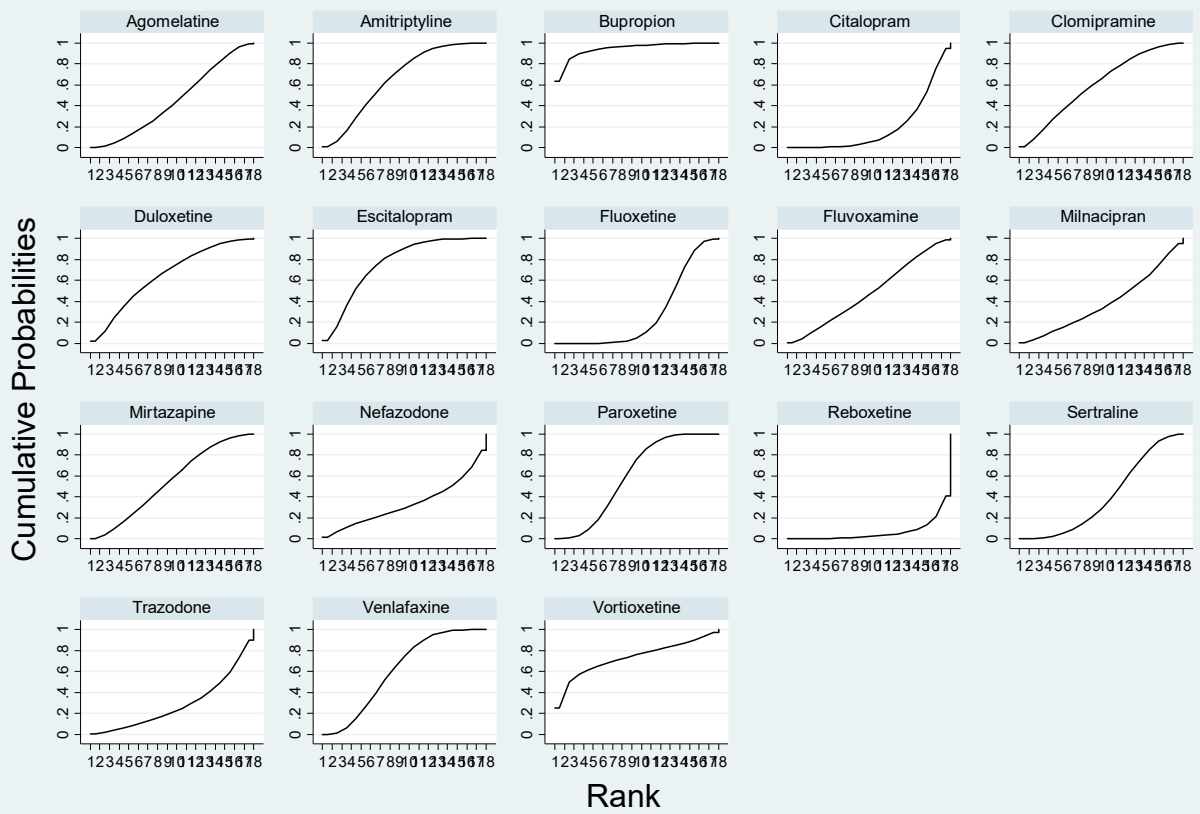

Graphs by Treatment

| Treatment     | SUCRA | PrBest | MeanRank |
|---------------|-------|--------|----------|
| Agomelatine   | 45.0  | 0.2    | 10.4     |
| Amitriptyline | 66.1  | 0.8    | 6.8      |
| Bupropion     | 94.4  | 63.5   | 2.0      |
| Citalopram    | 19.8  | 0.0    | 14.6     |
| Clomipramine  | 60.4  | 1.3    | 7.7      |
| Duloxetine    | 64.9  | 2.1    | 7.0      |
| Escitalopram  | 76.0  | 2.6    | 5.1      |
| Fluoxetine    | 28.5  | 0.0    | 13.2     |
| Fluvoxamine   | 48.3  | 0.7    | 9.8      |
| Milnacipran   | 38.5  | 0.7    | 11.5     |
| Mirtazapine   | 54.8  | 0.5    | 8.7      |
| Nefazodone    | 33.6  | 1.9    | 12.3     |
| Paroxetine    | 60.1  | 0.1    | 7.8      |
| Reboxetine    | 6.4   | 0.0    | 16.9     |
| Sertraline    | 40.2  | 0.0    | 11.2     |
| Trazodone     | 28.6  | 0.2    | 13.1     |
| Venlafaxine   | 61.5  | 0.1    | 7.6      |
| Vortioxetine  | 73.1  | 25.4   | 5.6      |

## 10.2.5 Dropouts due to adverse eventss

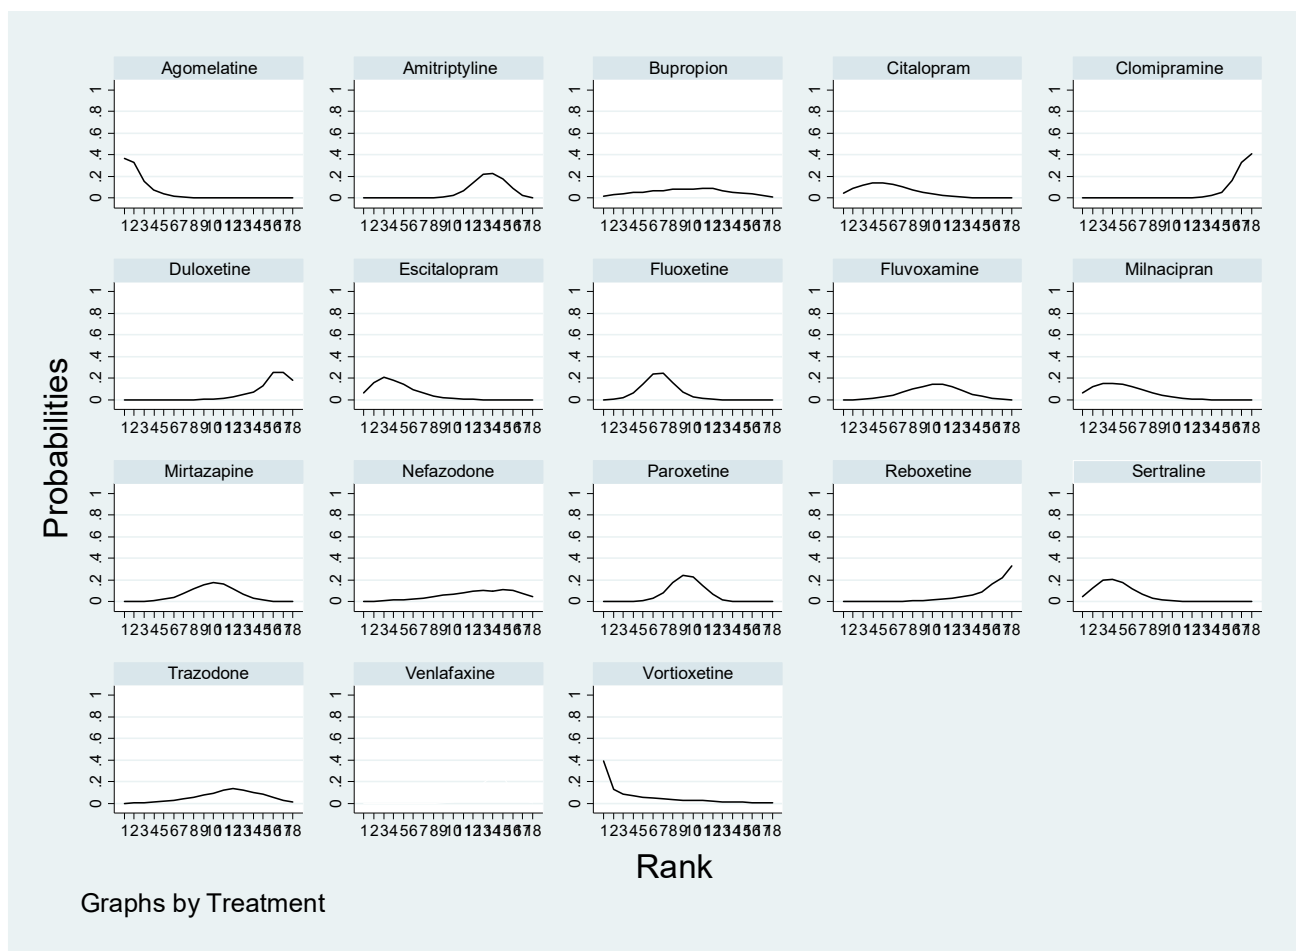

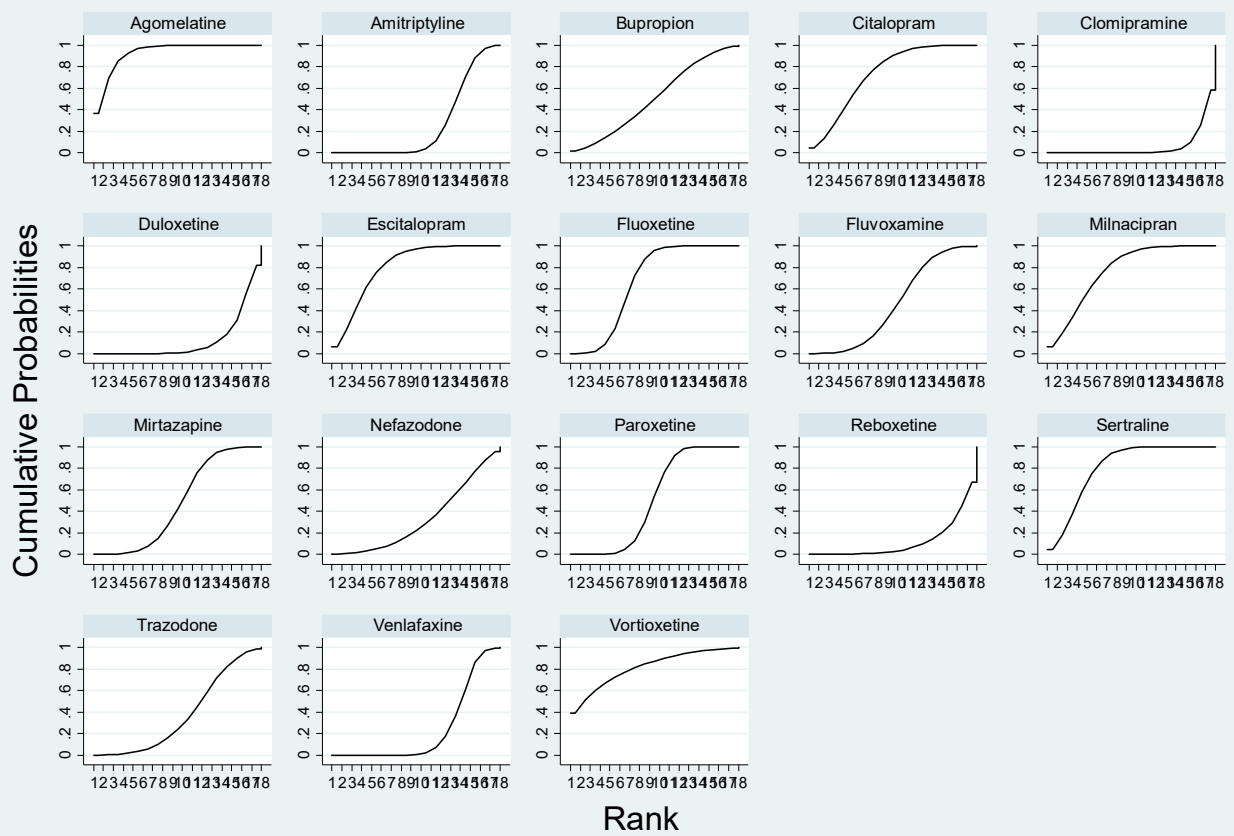

Graphs by Treatment

| Treatment     | SUCRA | PrBest | MeanRank |
|---------------|-------|--------|----------|
| Agomelatine   | 92.9  | 36.9   | 2.2      |
| Amitriptyline | 26.2  | 0.0    | 13.5     |
| Bupropion     | 50.9  | 1.8    | 9.4      |
| Citalopram    | 73.4  | 4.5    | 5.5      |
| Clomipramine  | 5.9   | 0.0    | 17.0     |
| Duloxetine    | 12.4  | 0.0    | 15.9     |
| Escitalopram  | 81.0  | 6.5    | 4.2      |
| Fluoxetine    | 66.9  | 0.0    | 6.6      |
| Fluvoxamine   | 46.2  | 0.0    | 10.1     |
| Milnacipran   | 77.0  | 6.4    | 4.9      |
| Mirtazapine   | 47.7  | 0.0    | 9.9      |
| Nefazodone    | 33.0  | 0.2    | 12.4     |
| Paroxetine    | 51.1  | 0.0    | 9.3      |
| Reboxetine    | 11.9  | 0.0    | 16.0     |
| Sertraline    | 80.5  | 4.7    | 4.3      |
| Trazodone     | 37.5  | 0.1    | 11.6     |
| Venlafaxine   | 23.9  | 0.0    | 13.9     |
| Vortioxetine  | 81.6  | 38.8   | 4.1      |

## 11 Post hoc sensitivity analyses and meta-regression analyses (as requested by peer reviewers)

### 11.1 Meta-regression using the mean age of participants as covariate

|                 | Response       |        |       |                    |        |       | Dropouts for any reason |        |       |                    |        |       |
|-----------------|----------------|--------|-------|--------------------|--------|-------|-------------------------|--------|-------|--------------------|--------|-------|
|                 | OR drug vs PLA |        |       | beta of comparison |        |       | OR drug vs PLA          |        |       | beta of comparison |        |       |
|                 | 2.5%           | median | 97.5% | 2.5%               | median | 97.5% | 2.5%                    | median | 97.5% | 2.5%               | median | 97.5% |
| Agomelatine     | 1.44           | 1.64   | 1.88  | 0.84               | 0.96   | 1.09  | 0.73                    | 0.85   | 0.98  | 0.90               | 1.04   | 1.20  |
| Amitriptyline   | 1.92           | 2.18   | 2.48  | 1.00               | 1.18   | 1.38  | 0.82                    | 0.94   | 1.08  | 0.73               | 0.87   | 1.03  |
| Bupropion       | 1.53           | 2.00   | 2.65  | 0.41               | 0.65   | 1.00  | 0.64                    | 0.84   | 1.11  | 0.84               | 1.29   | 1.98  |
| Citalopram      | 1.36           | 1.57   | 1.82  | 0.92               | 1.07   | 1.25  | 0.80                    | 0.95   | 1.13  | 0.63               | 0.79   | 0.98  |
| Clomipramine    | 1.03           | 1.36   | 1.78  | 0.86               | 1.06   | 1.30  | 1.00                    | 1.37   | 1.85  | 0.81               | 1.05   | 1.36  |
| Desvenlafaxine  | 1.22           | 1.48   | 1.80  | 0.62               | 0.99   | 1.56  | 0.82                    | 1.03   | 1.30  | 0.80               | 1.35   | 2.29  |
| Duloxetine      | 1.66           | 1.86   | 2.08  | 0.73               | 0.85   | 0.99  | 0.97                    | 1.10   | 1.24  | 0.92               | 1.06   | 1.21  |
| Escitalopram    | 1.47           | 1.65   | 1.84  | 0.97               | 1.09   | 1.23  | 0.81                    | 0.92   | 1.04  | 0.82               | 0.95   | 1.09  |
| Fluoxetine      | 1.40           | 1.53   | 1.66  | 1.04               | 1.14   | 1.25  | 0.81                    | 0.89   | 0.98  | 0.81               | 0.90   | 0.99  |
| Fluvoxamine     | 1.50           | 1.82   | 2.21  | 0.71               | 1.02   | 1.46  | 0.76                    | 0.98   | 1.25  | 0.60               | 1.12   | 2.13  |
| Levomilnacipran | 1.24           | 1.69   | 2.30  | 0.09               | 0.55   | 3.45  | 0.74                    | 1.04   | 1.46  | 0.46               | 2.99   | 19.38 |
| Milnacipran     | 1.34           | 1.72   | 2.20  | 0.49               | 0.83   | 1.39  | 0.70                    | 0.94   | 1.25  | 0.64               | 1.17   | 2.16  |
| Mirtazapine     | 1.59           | 1.85   | 2.16  | 0.75               | 0.92   | 1.13  | 0.86                    | 1.01   | 1.19  | 0.96               | 1.19   | 1.49  |
| Nefazodone      | 1.15           | 1.84   | 2.97  | 0.34               | 0.93   | 2.55  | 0.45                    | 0.76   | 1.28  | 0.46               | 1.36   | 3.99  |
| Paroxetine      | 1.60           | 1.74   | 1.89  | 0.88               | 0.98   | 1.08  | 0.87                    | 0.96   | 1.04  | 0.90               | 1.00   | 1.12  |
| Reboxetine      | 1.22           | 1.59   | 2.08  | 0.30               | 0.62   | 1.28  | 0.79                    | 1.09   | 1.51  | 0.52               | 1.19   | 2.75  |
| Sertraline      | 1.46           | 1.64   | 1.85  | 0.94               | 1.07   | 1.22  | 0.84                    | 0.96   | 1.09  | 0.81               | 0.92   | 1.06  |
| Trazodone       | 1.21           | 1.47   | 1.80  | 1.03               | 1.26   | 1.54  | 0.96                    | 1.19   | 1.48  | 0.67               | 0.88   | 1.15  |
| Venlafaxine     | 1.56           | 1.73   | 1.91  | 0.90               | 1.03   | 1.19  | 0.92                    | 1.04   | 1.16  | 0.87               | 1.05   | 1.26  |
| Vilazodone      | 0.52           | 1.48   | 4.06  | 0.10               | 1.91   | 42.35 | 0.49                    | 1.45   | 4.31  | 0.02               | 0.42   | 9.92  |
| Vortioxetine    | 1.45           | 1.67   | 1.92  | 0.74               | 0.91   | 1.11  | 0.86                    | 1.01   | 1.19  | 0.76               | 0.97   | 1.26  |

### 11.2 Meta-regression using the sex distribution (percentage of females in each study) as covariate

|                | Response       |        |       |                    |        |       | Dropouts for any reason |        |       |                    |        |        |
|----------------|----------------|--------|-------|--------------------|--------|-------|-------------------------|--------|-------|--------------------|--------|--------|
|                | OR drug vs PLA |        |       | beta of comparison |        |       | OR drug vs PLA          |        |       | beta of comparison |        |        |
|                | 2.5%           | median | 97.5% | 2.5%               | median | 97.5% | 2.5%                    | median | 97.5% | 2.5%               | median | 97.5%  |
| Agomelatine    | 1.10           | 1.47   | 1.95  | 0.55               | 0.80   | 1.14  | 0.60                    | 0.85   | 1.21  | 0.75               | 3.88   | 260.34 |
| Amitriptyline  | 1.47           | 1.89   | 2.43  | 0.77               | 0.97   | 1.23  | 0.72                    | 0.93   | 1.20  | 0.87               | 3.05   | 36.23  |
| Bupropion      | 0.84           | 1.27   | 1.91  | 0.80               | 1.06   | 1.40  | 0.87                    | 1.37   | 2.15  | 0.61               | 0.16   | 3.49   |
| Citalopram     | 1.28           | 1.65   | 2.12  | 0.42               | 0.63   | 0.92  | 0.69                    | 0.93   | 1.25  | -                  | -      | -      |
| Clomipramine   | 1.01           | 1.53   | 2.31  | 0.78               | 1.11   | 1.59  | 0.79                    | 1.30   | 2.13  | 0.66               | 1.00   | 69.76  |
| Desvenlafaxine | 1.20           | 1.50   | 1.89  | 0.84               | 0.99   | 1.16  | 0.84                    | 1.09   | 1.42  | 0.91               | 2.50   | 15.61  |

|                 |      |      |      |      |      |      |      |      |       |      |      |       |
|-----------------|------|------|------|------|------|------|------|------|-------|------|------|-------|
| Duloxetine      | 1.74 | 2.20 | 2.80 | 0.77 | 1.17 | 1.80 | 0.79 | 1.01 | 1.29  | 0.45 | 0.03 | 2.00  |
| Escitalopram    | 1.23 | 1.54 | 1.93 | 0.70 | 0.86 | 1.06 | 0.70 | 0.88 | 1.12  | 0.92 | 3.84 | 35.37 |
| Fluoxetine      | 1.34 | 1.55 | 1.81 | 0.77 | 0.92 | 1.10 | 0.71 | 0.83 | 0.97  | 0.91 | 3.15 | 26.39 |
| Fluvoxamine     | 0.93 | 1.46 | 2.29 | 0.56 | 0.90 | 1.48 | 0.69 | 1.14 | 1.86  | 0.49 | 0.09 | 8.36  |
| Levomilnacipran | 1.09 | 1.48 | 2.01 | 0.16 | 0.52 | 1.65 | 0.95 | 1.27 | 1.68  | -    | -    | -     |
| Milnacipran     | 0.58 | 1.16 | 2.32 | -    | -    | -    | 0.49 | 1.01 | 2.13  | -    | -    | -     |
| Mirtazapine     | 1.23 | 1.60 | 2.08 | 0.76 | 1.09 | 1.56 | 0.94 | 1.25 | 1.64  | 0.45 | 0.02 | 0.93  |
| Nefazodone      | 1.42 | 1.86 | 2.45 | 0.61 | 0.87 | 1.26 | 0.63 | 0.84 | 1.12  | 0.64 | 0.74 | 44.61 |
| Paroxetine      | 1.57 | 1.81 | 2.10 | 0.99 | 1.12 | 1.26 | 0.76 | 0.88 | 1.01  | 0.82 | 0.44 | 1.38  |
| Reboxetine      | 1.21 | 1.48 | 1.82 | 0.94 | 1.24 | 1.65 | 0.86 | 1.07 | 1.32  | 0.62 | 0.18 | 3.13  |
| Sertraline      | 1.17 | 1.46 | 1.82 | 0.92 | 1.23 | 1.64 | 0.74 | 0.94 | 1.19  | 0.78 | 1.68 | 34.88 |
| Trazodone       | 1.24 | 1.62 | 2.14 | -    | -    | -    | 0.89 | 1.20 | 1.60  | -    | -    | -     |
| Venlafaxine     | 1.54 | 1.79 | 2.07 | 0.89 | 1.07 | 1.29 | 0.92 | 1.08 | 1.26  | 0.85 | 1.23 | 8.04  |
| Vilazodone      | 0.19 | 0.97 | 4.70 | -    | -    | -    | 0.57 | 2.58 | 12.01 | -    | -    | -     |
| Vortioxetine    | 1.47 | 1.73 | 2.06 | 0.84 | 1.09 | 1.42 | 0.77 | 0.94 | 1.14  | 0.50 | 0.02 | 0.41  |

### 11.3 Sensitivity analysis excluding studies including bipolar patients

|                 | Response       |        |       |                    |        |       | Dropouts for any reason |        |       |                    |        |       |
|-----------------|----------------|--------|-------|--------------------|--------|-------|-------------------------|--------|-------|--------------------|--------|-------|
|                 | OR drug vs PLA |        |       | beta of comparison |        |       | OR drug vs PLA          |        |       | beta of comparison |        |       |
|                 | 2.5%           | median | 97.5% | 2.5%               | median | 97.5% | 2.5%                    | median | 97.5% | 2.5%               | median | 97.5% |
| Agomelatine     | 1.42           | 1.62   | 1.86  |                    |        |       | 0.72                    | 0.83   | 0.97  |                    |        |       |
| Amitriptyline   | 1.88           | 2.14   | 2.44  |                    |        |       | 0.83                    | 0.95   | 1.10  |                    |        |       |
| Bupropion       | 1.35           | 1.58   | 1.86  |                    |        |       | 0.80                    | 0.95   | 1.12  |                    |        |       |
| Citalopram      | 1.32           | 1.52   | 1.75  |                    |        |       | 0.81                    | 0.97   | 1.15  |                    |        |       |
| Clomipramine    | 1.18           | 1.49   | 1.88  |                    |        |       | 0.98                    | 1.27   | 1.66  |                    |        |       |
| Desvenlafaxine  | 1.24           | 1.49   | 1.79  |                    |        |       | 0.88                    | 1.08   | 1.33  |                    |        |       |
| Duloxetine      | 1.65           | 1.85   | 2.07  |                    |        |       | 0.96                    | 1.09   | 1.23  |                    |        |       |
| Escitalopram    | 1.50           | 1.67   | 1.87  |                    |        |       | 0.80                    | 0.91   | 1.02  |                    |        |       |
| Fluoxetine      | 1.39           | 1.51   | 1.65  |                    |        |       | 0.80                    | 0.88   | 0.96  |                    |        |       |
| Fluvoxamine     | 1.41           | 1.71   | 2.07  |                    |        |       | 0.92                    | 1.13   | 1.38  |                    |        |       |
| Levomilnacipran | 1.24           | 1.59   | 2.05  |                    |        |       | 0.93                    | 1.19   | 1.53  |                    |        |       |
| Milnacipran     | 1.21           | 1.62   | 2.17  |                    |        |       | 0.68                    | 0.95   | 1.32  |                    |        |       |
| Mirtazapine     | 1.63           | 1.89   | 2.20  |                    |        |       | 0.85                    | 0.99   | 1.15  |                    |        |       |
| Nefazodone      | 1.35           | 1.86   | 2.57  |                    |        |       | 0.54                    | 0.75   | 1.05  |                    |        |       |
| Paroxetine      | 1.61           | 1.74   | 1.90  |                    |        |       | 0.87                    | 0.95   | 1.03  |                    |        |       |
| Reboxetine      | 1.06           | 1.28   | 1.54  |                    |        |       | 1.00                    | 1.22   | 1.48  |                    |        |       |
| Sertraline      | 1.44           | 1.65   | 1.90  |                    |        |       | 0.84                    | 0.98   | 1.14  |                    |        |       |
| Trazodone       | 1.21           | 1.49   | 1.84  |                    |        |       | 0.87                    | 1.09   | 1.37  |                    |        |       |
| Venlafaxine     | 1.61           | 1.78   | 1.97  |                    |        |       | 0.92                    | 1.02   | 1.14  |                    |        |       |
| Vilazodone      | 1.27           | 1.60   | 2.01  |                    |        |       | 0.89                    | 1.15   | 1.48  |                    |        |       |



|              |      |      |      |  |      |      |      |
|--------------|------|------|------|--|------|------|------|
| Vortioxetine | 1.44 | 1.66 | 1.92 |  | 0.86 | 1.01 | 1.19 |
|--------------|------|------|------|--|------|------|------|

11.4 Sensitivity analysis for study duration (8 weeks or less versus more than 8 weeks)

|                 | Response |        |       |      |        |       | Dropouts for any reason |        |       |      |        |       |
|-----------------|----------|--------|-------|------|--------|-------|-------------------------|--------|-------|------|--------|-------|
|                 | <=8      |        |       | >8   |        |       | <=8                     |        |       | >8   |        |       |
|                 | 2.5%     | median | 97.5% | 2.5% | median | 97.5% | 2.5%                    | median | 97.5% | 2.5% | median | 97.5% |
| Agomelatine     | 1.41     | 1.73   | 2.13  | 1.26 | 1.49   | 1.76  | 0.68                    | 0.85   | 1.06  | 0.65 | 0.81   | 1.01  |
| Amitriptyline   | 1.90     | 2.16   | 2.46  | 1.30 | 2.14   | 3.57  | 0.84                    | 0.96   | 1.10  | 0.46 | 0.74   | 1.21  |
| Bupropion       | 1.32     | 1.57   | 1.87  | 1.16 | 1.95   | 3.28  | 0.80                    | 0.96   | 1.15  | 0.55 | 0.96   | 1.71  |
| Citalopram      | 1.30     | 1.51   | 1.76  | 1.03 | 1.47   | 2.11  | 0.80                    | 0.96   | 1.15  | 0.64 | 1.00   | 1.58  |
| Clomipramine    | 1.15     | 1.48   | 1.90  | 0.97 | 1.41   | 2.06  | 0.93                    | 1.25   | 1.69  | 0.90 | 1.56   | 2.73  |
| Desvenlafaxine  | 1.18     | 1.45   | 1.79  | 1.13 | 1.86   | 3.03  | 0.92                    | 1.15   | 1.44  | 0.38 | 0.71   | 1.34  |
| Duloxetine      | 1.67     | 1.90   | 2.16  | 1.31 | 1.69   | 2.17  | 1.01                    | 1.15   | 1.31  | 0.50 | 0.72   | 1.02  |
| Escitalopram    | 1.52     | 1.71   | 1.94  | 1.02 | 1.37   | 1.82  | 0.79                    | 0.90   | 1.02  | 0.72 | 1.04   | 1.51  |
| Fluoxetine      | 1.37     | 1.51   | 1.67  | 1.32 | 1.54   | 1.77  | 0.81                    | 0.90   | 1.00  | 0.68 | 0.82   | 0.98  |
| Fluvoxamine     | 1.42     | 1.70   | 2.05  | -    | -      | -     | 0.92                    | 1.11   | 1.34  | -    | -      | -     |
| Levomilnacipran | 1.11     | 1.49   | 2.02  | 1.27 | 1.99   | 3.12  | 1.01                    | 1.33   | 1.76  | 0.42 | 0.76   | 1.37  |
| Milnacipran     | 1.29     | 1.80   | 2.52  | 1.13 | 1.56   | 2.19  | 0.68                    | 0.97   | 1.40  | 0.60 | 0.95   | 1.48  |
| Mirtazapine     | 1.66     | 1.94   | 2.27  | 0.61 | 1.20   | 2.29  | 0.85                    | 0.99   | 1.17  | 0.49 | 1.04   | 2.16  |
| Nefazodone      | 1.36     | 1.74   | 2.23  | 0.09 | 0.44   | 1.77  | 0.70                    | 0.91   | 1.17  | 0.37 | 1.98   | 13.40 |
| Paroxetine      | 1.66     | 1.83   | 2.01  | 1.30 | 1.50   | 1.74  | 0.85                    | 0.94   | 1.04  | 0.85 | 1.01   | 1.20  |
| Reboxetine      | 1.21     | 1.45   | 1.75  | 0.46 | 0.85   | 1.58  | 0.93                    | 1.14   | 1.38  | 0.72 | 1.62   | 3.70  |
| Sertraline      | 1.48     | 1.68   | 1.91  | 1.16 | 1.61   | 2.24  | 0.82                    | 0.94   | 1.07  | 0.77 | 1.13   | 1.66  |
| Trazodone       | 1.25     | 1.52   | 1.86  | -    | -      | -     | 0.93                    | 1.15   | 1.43  | -    | -      | -     |
| Venlafaxine     | 1.62     | 1.83   | 2.06  | 1.41 | 1.68   | 2.00  | 0.92                    | 1.05   | 1.19  | 0.81 | 1.01   | 1.26  |
| Vilazodone      | 1.18     | 1.55   | 2.03  | 1.13 | 1.72   | 2.62  | 0.80                    | 1.09   | 1.48  | 0.77 | 1.32   | 2.24  |
| Vortioxetine    | 1.45     | 1.68   | 1.95  | 0.86 | 1.43   | 2.44  | 0.88                    | 1.03   | 1.21  | 0.55 | 0.92   | 1.53  |

11.5 Sensitivity analysis for country (North America only vs other)

|               | Response      |        |       |       |        |       | Dropouts for any reason |        |       |       |        |       |
|---------------|---------------|--------|-------|-------|--------|-------|-------------------------|--------|-------|-------|--------|-------|
|               | North America |        |       | Other |        |       | North America           |        |       | Other |        |       |
|               | 2.5%          | median | 97.5% | 2.5%  | median | 97.5% | 2.5%                    | median | 97.5% | 2.5%  | median | 97.5% |
| Agomelatine   | -             | -      | -     | 1.23  | 1.65   | 2.23  | -                       | -      | -     | 0.53  | 0.73   | 1.01  |
| Amitriptyline | 1.94          | 2.32   | 2.77  | 1.49  | 1.83   | 2.25  | 0.78                    | 0.95   | 1.15  | 0.71  | 0.89   | 1.12  |
| Bupropion     | 1.41          | 1.65   | 1.95  | 0.46  | 0.87   | 1.66  | 0.81                    | 0.97   | 1.16  | -     | -      | -     |
| Citalopram    | 1.29          | 1.59   | 1.96  | 1.11  | 1.41   | 1.78  | 0.84                    | 1.10   | 1.43  | 0.59  | 0.79   | 1.04  |
| Clomipramine  | -             | -      | -     | 0.98  | 1.30   | 1.73  | -                       | -      | -     | 0.79  | 1.13   | 1.61  |

|                 |      |      |      |      |      |      |      |      |      |      |      |      |
|-----------------|------|------|------|------|------|------|------|------|------|------|------|------|
| Desvenlafaxine  | 1.16 | 1.42 | 1.73 | -    | -    | -    | 0.84 | 1.08 | 1.39 | -    | -    | -    |
| Duloxetine      | 1.48 | 1.72 | 2.00 | 1.40 | 1.93 | 2.67 | 0.97 | 1.16 | 1.39 | 0.58 | 0.85 | 1.24 |
| Escitalopram    | 1.36 | 1.58 | 1.83 | 1.35 | 1.68 | 2.10 | 0.85 | 1.02 | 1.22 | 0.52 | 0.67 | 0.87 |
| Fluoxetine      | 1.45 | 1.62 | 1.82 | 1.11 | 1.32 | 1.58 | 0.73 | 0.83 | 0.95 | 0.73 | 0.89 | 1.08 |
| Fluvoxamine     | 1.65 | 2.27 | 3.16 | 0.93 | 1.23 | 1.63 | 0.81 | 1.10 | 1.50 | 0.74 | 1.02 | 1.40 |
| Levomilnacipran | 1.14 | 1.50 | 1.96 | -    | -    | -    | 0.98 | 1.33 | 1.80 | -    | -    | -    |
| Milnacipran     | -    | -    | -    | 1.13 | 1.52 | 2.05 | -    | -    | -    | 0.65 | 0.89 | 1.24 |
| Mirtazapine     | 1.57 | 1.97 | 2.47 | 1.34 | 1.71 | 2.19 | 0.74 | 0.95 | 1.22 | 0.73 | 0.95 | 1.24 |
| Nefazodone      | 1.38 | 1.79 | 2.33 | 0.67 | 1.19 | 2.13 | 0.65 | 0.87 | 1.16 | 0.62 | 1.19 | 2.31 |
| Paroxetine      | 1.47 | 1.65 | 1.85 | 1.39 | 1.64 | 1.94 | 0.94 | 1.07 | 1.21 | 0.70 | 0.85 | 1.02 |
| Reboxetine      | 0.92 | 1.19 | 1.53 | 0.68 | 1.03 | 1.56 | 1.00 | 1.34 | 1.80 | 0.83 | 1.31 | 2.06 |
| Sertraline      | 1.48 | 1.72 | 2.01 | 1.18 | 1.47 | 1.83 | 0.85 | 1.01 | 1.20 | 0.68 | 0.88 | 1.14 |
| Trazodone       | 1.20 | 1.56 | 2.02 | 1.00 | 1.37 | 1.88 | 0.87 | 1.17 | 1.56 | 0.72 | 1.04 | 1.50 |
| Venlafaxine     | 1.46 | 1.70 | 1.99 | 1.41 | 1.72 | 2.09 | 0.84 | 1.02 | 1.24 | 0.79 | 0.98 | 1.21 |
| Vilazodone      | 1.30 | 1.62 | 2.01 | -    | -    | -    | 0.88 | 1.17 | 1.55 | -    | -    | -    |
| Vortioxetine    | 0.95 | 1.20 | 1.51 | 1.18 | 1.88 | 3.01 | 0.83 | 1.11 | 1.48 | 0.37 | 0.63 | 1.10 |

## ***12 Changes to the protocol***

Of the seven pre-planned network meta-regressions, we did not conduct one by ‘response to placebo’ because this was logically inappropriate to conduct. That is, the two primary outcomes of interest, OR for response already contains this information and it would not make sense to regress OR for response (i.e. response to drug over response to placebo) on response to placebo.
